# Supplementary material for: Global patterns of enhancer activity during sea urchin embryogenesis assessed by eRNA profiling
Source: HighWire-hosted journal article supplement (doi:10.1101/gr.275684.121), 2021-07-30
Supplement: Supplemental_Table_S1.xlsx [file Supplemental_Table_S1.xlsx]

## Sheet: Sheet1
Cluster	Motif Rank	Pvalue (P<1.00E-12)	Targets (%)	Background (%)	Best Match (JASPAR/HOMER)	Match Score
1	1	1e-34	8.85	3.67	SOX15	0.87
	2	1e-30	6.15	2.26	SPDEF	0.87
	3	1e-27	6.97	2.86	PITX3	0.93
	4	1e-21	2.24	0.5	KLF16	0.86
	5	1e-20	0.57	0.01	BBX_1	0.69
	6	1e-19	16.14	10.48	SOX1_1	0.64
	7	1e-18	36.22	28.46	SOX11_1	0.73
	8	1e-15	3.09	1.12	LEC2	0.76
	9	1e-15	22.93	16.93	CUX1	0.8
	10	1e-15	0.6	0.04	RTG3	0.77
	11	1e-13	0.32	0.01	AGL42	0.78
	12	1e-13	1.6	0.4	TEC1	0.66
2	1	1e-34	14.17	4.16	STAT5a::STAT5b	0.95
	2	1e-34	12.84	3.55	JUNB(var.2)	0.93
	3	1e-27	31.5	17.16	SOX15	0.93
	4	1e-16	17.13	8.71	ETS1(ETS)	0.76
	5	1e-15	6.32	1.87	FOSB::JUNB	0.96
	6	1e-14	30.17	19.64	PITX3	0.9
	7	1e-14	4.28	0.95	NKX2_5(var.2)	0.74
	8	1e-14	2.75	0.38	AT1G72740	0.67
	9	1e-13	3.26	0.58	FOXJ1_1	0.76
	10	1e-13	0.61	0	OSR2_1	0.63
3	1	1e-18	1.25	0.02	PI	0.62
	2	1e-13	1.25	0.06	ELT_3	0.73
4	1	1e-18	3.86	0.33	SIX2	0.62
	2	1e-14	2.78	0.19	ZFP691_1	0.79
	3	1e-14	1.08	0.01	ATF3	0.67
	4	1e-13	3.55	0.42	ARF2	0.66
5	1	1e-32	33.52	15.55	SOX15	0.87
	2	1e-18	8.76	2.28	JUNB(var.2)	0.97
	3	1e-16	3.42	0.34	ZFP691_2	0.71
	4	1e-15	4.51	0.73	FOS::JUND	0.83
	5	1e-15	6.43	1.55	BREu	0.72
	6	1e-14	5.75	1.31	DUX	0.83
	7	1e-13	0.82	0	SIX2	0.61
	8	1e-13	4.1	0.73	RGM1	0.64
6	1	1e-23	27.81	12.21	SOX15	0.88
	2	1e-17	12.4	3.83	CCAAT-box	0.77
	3	1e-15	1.17	0	SPDEF_2	0.69
	4	1e-14	1.34	0.01	YER130C	0.61
	5	1e-14	1.01	0	NR2E3	0.7
	6	1e-14	1.01	0	STP3	0.68
	7	1e-13	16.08	7.01	HAT2	0.78
	8	1e-13	1.84	0.06	FOXB1	0.74
7	1	1e-17	2.91	0.16	ZFP691_2	0.72
	2	1e-13	1.07	0.01	ZBTB3_1	0.74
8	1	1e-14	0.96	0	DAL82	0.66
	2	1e-14	28.48	16.12	SOX13	0.92
	3	1e-14	23.84	12.53	GSC	0.95
	4	1e-14	1.44	0.02	MSX2	0.73
9	1	1e-15	16.85	6.85	HLH_11	0.68
	2	1e-14	2.69	0.14	GCR1	0.71
	3	1e-13	3.23	0.25	RUNX2	0.62
	4	1e-13	1.25	0.01	AT1G47655	0.69
	5	1e-13	10.57	3.48	GATA6	0.9
10	1	1e-13	3.06	0.22	GATA5_1	0.66
11	1	1e-18	25.92	12.6	AZF1	0.74
	2	1e-16	6.08	1.1	POU5F1::SOX2	0.71
	3	1e-15	1.44	0.01	SWI5	0.74
	4	1e-13	2.24	0.12	NFYA	0.78
	5	1e-13	1.6	0.04	SMAD3_1	0.64
12	1	1e-66	11.7	2.54	STAT5a::STAT5b	0.94
	2	1e-56	7.94	1.36	HSF4	0.95
	3	1e-40	6.42	1.27	MEF2A	0.93
	4	1e-35	9.82	3.15	JUNB(var.2)	0.98
	5	1e-35	22.24	11.42	SOX15	0.93
	6	1e-33	6.24	1.42	FOS::JUNB	0.97
	7	1e-29	0.91	0.01	YY1	0.6
	8	1e-27	0.85	0.01	GCR2	0.72
	9	1e-25	0.91	0.01	TOS8	0.64
	10	1e-23	2.97	0.44	NFKB2	0.94
	11	1e-23	0.67	0	NHLH1	0.64
	12	1e-23	7.82	2.82	NFYA	0.94
	13	1e-22	0.91	0.01	LEC2	0.64
	14	1e-20	8.36	3.42	MAX	0.91
	15	1e-20	4	0.98	CEBPG	0.93
	16	1e-18	0.61	0.01	AT1G49560	0.56
	17	1e-16	0.91	0.03	OSR1_2	0.62
	18	1e-15	2.48	0.52	IRX5	0.76
	19	1e-13	0.42	0	SWI5	0.73
13	1	1e-40	34.5	13.33	SOX15	0.91
	2	1e-24	7.31	0.99	TEF	0.96
	3	1e-19	2.7	0.09	NFYA	0.82
	4	1e-18	38	22.17	SOX9	0.79
	5	1e-16	1.11	0	LYS14	0.73
	6	1e-15	1.27	0.01	SOX18_2	0.67
	7	1e-14	1.27	0.01	BARHL2	0.69
	8	1e-14	1.75	0.04	AT5G18450	0.69
	9	1e-14	27.98	15.7	SOX1_1	0.75
	10	1e-13	2.07	0.08	ERF7	0.67
	11	1e-13	3.66	0.44	GSC2	0.84
	12	1e-13	4.93	0.87	SPDEF	0.91
	13	1e-13	3.02	0.27	E2FA	0.78
14	1	1e-37	8.47	1	SWI5	0.83
	2	1e-14	16.95	8.25	ELF3(ETS)	0.9
	3	1e-14	2.48	0.21	PBX1	0.62
	4	1e-13	0.78	0	WRKY62	0.58
	5	1e-13	9.91	3.72	SOX9	0.87
15	1	1e-18	12.88	4.73	SOX10	0.8
	2	1e-15	25.88	14.62	CIN5	0.94
	3	1e-15	1.89	0.08	ZIC1_2	0.6
	4	1e-15	1.77	0.07	DDIT3::CEBPA	0.73
	5	1e-13	1.39	0.04	ZNF143	0.69
	6	1e-13	3.28	0.46	ID4	0.7
16	1	1e-34	8.97	1.73	SWI5	0.85
	2	1e-27	16.72	6.56	SOX9	0.9
	3	1e-19	12.03	4.71	EWS:ERG-fusion(ETS)	0.99
	4	1e-18	2.34	0.17	RGM1	0.73
	5	1e-15	0.82	0.01	YAP5	0.63
	6	1e-14	11.01	4.74	SOX17_2	0.73
	7	1e-13	4.49	1.1	SPL8	0.64
	8	1e-13	1.63	0.11	BBX_1	0.66
	9	1e-13	7.03	2.53	MYB98	0.75
17	1	1e-42	23.23	8.16	SOX9	0.91
	2	1e-31	10.89	2.57	PITX1	0.96
	3	1e-18	0.9	0	EBF1	0.67
	4	1e-16	0.9	0.01	GAT1	0.71
	5	1e-13	2.92	0.42	TCF7L2	0.77
	6	1e-13	0.67	0	ZBTB12_2	0.69
	7	1e-13	8.64	3.3	SOX12_2	0.73
18	1	1e-101	22.53	3.91	TP73	0.8
	2	1e-33	21.05	8.63	SOX15	0.88
	3	1e-22	5.83	1.14	SOX10	0.69
	4	1e-21	3.16	0.3	FOXK1_1	0.62
	5	1e-20	3.66	0.45	YLR278C	0.67
	6	1e-20	2.57	0.19	MBP1::SWI6	0.79
	7	1e-19	10.87	4.03	NR2E3	0.64
	8	1e-18	5.24	1.16	TSAR1	0.63
	9	1e-16	2.77	0.31	JUN::JUNB	0.76
	10	1e-15	4.05	0.83	NFYA	0.88
	11	1e-15	0.89	0.01	KLF7_2	0.74
	12	1e-14	0.99	0.02	DOF2	0.68
	13	1e-14	1.19	0.04	RORC	0.69
	14	1e-13	0.89	0.02	FOSL1::JUN(var.2)	0.76
19	1	1e-27	5.05	0.6	TEF	0.9
	2	1e-23	32.21	18.41	SOX13	0.93
	3	1e-23	4	0.44	SWI5	0.8
	4	1e-20	21.47	10.91	WRKY63	0.79
	5	1e-19	23.26	12.37	FOXP3	0.8
	6	1e-19	3.47	0.42	SOX17_2	0.68
	7	1e-16	5.26	1.25	HNF1A	0.88
	8	1e-15	3.26	0.48	GFI1	0.72
	9	1e-13	22.63	13.67	PITX3	0.74
20	1	1e-43	12.32	1.31	SWI5	0.78
	2	1e-16	3.21	0.17	OTX1	0.69
	3	1e-15	8.21	1.91	ERG(ETS)	0.84
	4	1e-14	1.07	0	GCM1	0.69
	5	1e-14	2.32	0.08	NFE2	0.61
	6	1e-14	12.68	4.46	SOX14_2	0.83
	7	1e-13	7.86	1.96	LIM4	0.9

## Sheet: README
Supplemental Table S1: Summary of cluster-specific transcription factor binding motif enrichment.
