# Supplementary material for: Global patterns of enhancer activity during sea urchin embryogenesis assessed by eRNA profiling
Source: HighWire-hosted journal article supplement (doi:10.1101/gr.275684.121), 2021-07-30
Supplement: Supplemental_Table_S2.xlsx [file Supplemental_Table_S2.xlsx]

## Sheet: Sheet1
Single-gene CRM analysis
Gene	Gene ID	Cufflinks WHL	Scaffold (v3.1)	Overlap with eRNA peak(s)?	Reference(s)
Sp-alx1	SPU_025302	WHL22.731056	Scaffold881	No	Damle and Davidson (2011)
Sp-blimp1/krox	SPU_027235	WHL22.5073	Scaffold1008	Yes (Module CR2)	Livi and Davidson (2006); Smith et al. (2008a)
Sp-cycD	SPU_007013	WHL22.727579	Scaffold87	Yes (Region 2, 5, and 6)	McCarty and Coffman (2013)
Sp-cyIIa or Sp-cskaIIa	SPU_009482	WHL22.184359	Scaffold1400	No	Arnone et al. (1998); Martin et al. (2001)
Sp-cyIIIb or Sp-cplcaIIIb	SPU_009433	WHL22.288460	Scaffold213	Yes (Region C)	Xu et al. (1996)
Sp-delta	SPU_016128	WHL22.423696	Scaffold329	Yes (Module R11)	Revilla-i-Domingo et al. (2004)
Sp-endo16	SPU_011038	WHL22.415061	Scaffold329	No	Yuh and Davidson (1996); Yuh et al. (2001); Yuh et al. (2005)
Sp-eve	SPU_012253	WHL22.442145	Scaffold348	Yes (Module 5P)	Smith et al. (2008b)
Sp-foxa	SPU_006676	WHL22.439762	Scaffold345	Yes (Module K)	Ben-Tabou de-Leon and Davidson. (2010)
Sp-gatae	SPU_010635	WHL22.78013	Scaffold127	Yes (Module 10 and 24)	Lee et al. (2007)
Sp-gcm	SPU_006462	WHL22.54333	Scaffold118	No	Ransick and Davidson (2006); Ransick and Davidson (2012)
Sp-hox11/13b	SPU_002631	WHL22.630181	Scaffold636	Yes (Module E and sub-module ME)	Cui et al. (2017)
Sp-nodal	SPU_011064	WHL22.61754	Scaffold1203	Yes (Modules 5P and INT)	Nam et al. (2007)
Sp-onecut	SPU_016449	WHL22.288683	Scaffold224	Yes (proximal CRM)	Barsi and Davidson (2016)
Sp-otx	SPU_010424	WHL22.532435	Scaffold468	Yes (Element Otx6 and Otx11)	Yuh et al. (2002); Yuh et al. (2004)
Sp-pks1	SPU_002895	WHL22.202707	Scaffold174	Yes	Calestani and Rogers (2010)
Sp-sip1	SPU_026620	WHL22.768399	Scaffold993	No	Nam et al (2010); Li et al. (2013)
Sp-sm30a	SPU_000825	WHL22.518127	Scaffold4453	Yes (repressive element)	Frudakis and Wilt (1995); Yamasu and Wilt (1999)
Sp-sm50	SPU_018811	WHL22.742398	Scaffold903	No	Makabe et al. (1995); Walters et al. (2008)
Sp-spec2a	SPU_026687	WHL22.416148	Scaffold3107	No	Gan et al. (1990); Gan and Klein (1993); Mao et al. (1994); Li et al. (2002)
Sp-tbr	SPU_025584	WHL22.503644	Scaffold424	Yes (Modules γ(2) and C)	Wahl et al. (2009)
Sp-tbx2/3	SPU_023386	WHL22.457020	Scaffold364	Yes (Module U and B)	Ben-Tabou de-Leon et al. (2013)
Sp-wnt8	SPU_020371	WHL22.8923	Scaffold102	No	Minokawa et al. (2005)
Genome-wide/high-throughput CRM discovery
Nam et al. (2010)
Gene	Gene ID	Cufflinks WHL	Scaffold (v3.1)	Overlap with eRNA peak(s)?
Sp-atbf1	SPU_017348	WHL22.369567	Scaffold28	Yes (Atbf1_Uf_02; Atbf1_Uf_06)
Sp-bmp2/4	SPU_000669	WHL22.438846	Scaffold344	Yes (Bmp24_Ur_03; Bmp24_Ur_01)
Sp-chrd	SPU_004983	WHL22.124093	Scaffold1440	Yes (Chordin_Ir_02; Chordin_Ur_03)
Sp-dach	SPU_028061	WHL22.169355	Scaffold1640	Yes (Dach_If_09)
Sp-dlx	SPU_002815	WHL22.107309	Scaffold119	Yes (Dlx_Ir_02)
Sp-dri	SPU_005718	WHL22.544150	Scaffold48	Yes (Dri_Ir_02)
Sp-elk	SPU_012469	WHL22.626998	Scaffold630	Yes (Elk_Ur_01; Elk_Ir_01; Elk_Ir_03)
Sp-ese	SPU_024903	WHL22.110532	Scaffold1386	Yes (Ese_Ir_01-3)
Sp-foxB	SPU_004551	WHL22.743430	Scaffold912	No
Sp-foxJ1	SPU_027969	WHL22.468365	Scaffold378	Yes (FoxJ1_Uf_01; FoxJ1_Uf_03)
Sp-foxn2/3	SPU_015243	WHL22.607384	Scaffold592	Yes (FoxN23_Uf_01)
Sp-foxO	SPU_009178	WHL22.241099	Scaffold199	Yes (FoxO_Dr_02)
Sp-gataC	SPU_027015	WHL22.660411	Scaffold704	Yes (GataC_Uf_02)
Sp-gsc	SPU_015982	WHL22.531818	Scaffold468	Yes (Gsc_Uf_01)
Sp-hnf1	SPU_008196	WHL22.83266	Scaffold129	Yes (Hnf1_Ir_02)
Sp-id	SPU_015374	WHL22.467043	Scaffold376	Yes (Id_Uf_01; Id_Uf_03)
Sp-irxA	SPU_010351	WHL22.651130	Scaffold688	Yes (IrxA_Df_05)
Sp-lim1	SPU_006991	WHL22.720614	Scaffold857	Yes (Lim1_Ir_01)
Sp-myc	SPU_003166	WHL22.687558	Scaffold770	Yes (Myc_Ur_01)
Sp-nfe2	SPU_011174	WHL22.621478	Scaffold62	No
Sp-nk1	SPU_012491	WHL22.152063	Scaffold1564	Yes (Nk1_Uf_01)
Sp-nkx2-2	SPU_000756	WHL22.739246	Scaffold901	Yes (NK22_Uf_01-3)
Sp-not	SPU_002129	WHL22.632281	Scaffold641	Yes (Not_Ur_01)
Sp-prox1	SPU_015984	WHL22.531966	Scaffold468	Yes (Prox_Ur_02; Prox_Ur_03)
Sp-soxB1	SPU_022820	WHL22.104606	Scaffold1358	Yes (SoxB1_If_01; SoxB1_Uf_01)
Sp-tbx2/3	SPU_023386	WHL22.457020	Scaffold364	Yes (Tbx23_Ur_01)
Sp-univin	SPU_000668	WHL22.438771	Scaffold344	Yes (Univin_Ir_01-2)
Sp-z13	SPU_021947	WHL22.407274	Scaffold3133	Yes (Z13_Uf_01)
Sp-z188	SPU_023727	WHL22.198668	Scaffold153	Yes (Z188_Ir_01; Z188_Ir_02)
Shashikant et al. 2018
Gene	Gene ID	Cufflinks WHL	Scaffold (v3.1)	Overlap with eRNA peak(s)?
Intergenic	none	none	Scaffold149	No
Sp-c-lectin/PMC1	SPU_027906	WHL22.411802	Scaffold317	Yes
Sp-emi/tm	none	WHL22.691495	Scaffold780	No
Sp-hypp_2386	SPU_018405	WHL22.239326	Scaffold198	No
Sp-kirrelL	SPU_024995	WHL22.699052	Scaffold8	Yes
Sp-mitf	SPU_008175	WHL22.677144	Scaffold743	Yes
Sp-msp130r2	SPU_016506	WHL22.451280	Scaffold358	Yes
Sp-sh2d5	SPU_026362	WHL22.637506	Scaffold652	No
SPU_023052	SPU_023052	WHL22.364101	Scaffold279	No
Khor et al. 2019
Gene	Gene ID	Cufflinks WHL	Scaffold (v3.1)	Overlap with eRNA peak(s)?
Sp-alx4	SPU_022816	WHL22.731149	Scaffold88	No
Sp-anpep_1	SPU_023693	WHL22.119959	Scaffold142	No
Sp-clect_14 (Sp-sm20)	SPU_005991	WHL22.39473	Scaffold1119	No
Sp-clect_25	SPU_011163	WHL22.411845	Scaffold317	No
Sp-c-lectin/PMC1 (Sp-sm49)	SPU_027906	WHL22.411802	Scaffold317	Yes
Sp-emi/tm	none	WHL22.691495	Scaffold780	No
Sp-fbn2	SPU_028567	WHL22.314476	Scaffold2416	No
Sp-fos	SPU_021173	WHL22.538480	Scaffold477	Yes
Sp-foxB	SPU_004551	WHL22.743430	Scaffold912	No
Sp-hypp_2998	SPU_018406	WHL22.239379	Scaffold198	Yes
Sp-hypp_3018	SPU_012929	WHL22.279611	Scaffold219	No
Sp-hypp_3152 (Sp-p16r1)	SPU_018403	WHL22.239320	Scaffold198	No
Sp-hypp_3153 (Sp-p16r2)	SPU_018408	WHL22.239394	Scaffold198	Yes
Sp-kirrelL	SPU_024995	WHL22.699052	Scaffold8	Yes
Sp-msp130r2	SPU_016506	WHL22.451280	Scaffold358	Yes
Sp-msp130r3	SPU_013823	WHL22.438994	Scaffold343	No
Sp-msp130r3_1	SPU_006387	WHL22.438997	Scaffold343	No
Sp-mtmmpb	SPU_028749	WHL22.312057	Scaffold240	No
Sp-mtmmpd	SPU_013669	WHL22.312130	Scaffold240	No
Sp-nk7	SPU_022573	WHL22.567485	Scaffold520	No
Sp-p16	SPU_018408	WHL22.239481	Scaffold198	No
Sp-serpL4	SPU_013378	WHL22.121357	Scaffold143	No
Sp-slc26a5	SPU_016155	WHL22.228208	Scaffold192	Yes
Wang et al. 2019
Gene	Gene ID	Cufflinks WHL	Scaffold (v3.1)	Overlap with eRNA peak(s)?
Sp-arhgap28	SPU_02768	WHL22.409669	Scaffold315	Yes
Sp-astacin1	SPU_019655	WHL22.642085	Scaffold663	No
Sp-colp3a	SPU_003768	WHL22.590901	Scaffold559	Yes
Sp-csrnp2	SPU_014613	WHL22.749825	Scaffold931	No
Sp-dri	SPU_005718	WHL22.544154	Scaffold48	No
Sp-hypp2998	SPU_018407	WHL22.239379	Scaffold198	No
Sp-mitf	SPU_008175	WHL22.677144	Scaffold743	No
Sp-p58a	SPU_000439	WHL22.23776	Scaffold107	No

## Sheet: README
Supplemental Table S2: Literature survey of cis-regulatory modules and summary of eRNA peak overlap.
