# Supplementary material for: Global patterns of enhancer activity during sea urchin embryogenesis assessed by eRNA profiling
Source: HighWire-hosted journal article supplement (doi:10.1101/gr.275684.121), 2021-07-30
Supplement: Supplemental_Table_S3.xlsx [file Supplemental_Table_S3.xlsx]

## Sheet: Sheet1
Cluster	Motif Rank	Pvalue (P<1.00E-11)	Targets (%)	Background (%)	Best Match (JASPAR/HOMER)	Match Score
1	NA
2	NA
3	1	1e-12	8.7	0.03	SOX6	0.71
4	1	1e-15	27.89	6.45	Ets1-distal(ETS)	0.95
	2	1e-14	25.17	5.55	FOS::JUN	0.98
5	1	1e-13	3.42	0.01	RORA	0.65
6	1	1e-12	6.72	0.12	MOT2	0.71

## Sheet: README
Supplemental Table S3: Summary of cluster-specific transcription factor binding motif enrichment with eRNAs located within 20 kb of gene differentially expressed by PMCs.
