# Supplementary material for: Global patterns of enhancer activity during sea urchin embryogenesis assessed by eRNA profiling
Source: HighWire-hosted journal article supplement (doi:10.1101/gr.275684.121), 2021-07-30
Supplement: Supplemental_Table_S4.xlsx [file Supplemental_Table_S4.xlsx]

## Sheet: Sheet1
eRNA peak name (genome v3.1)	Scaffold (genome v3.1)	Start (genome v3.1)	End (genome v3.1)	Closest gene (genome v3.1 WHL ID)	Closest gene (genome v3.1 SPU ID)	Sequence (genome v3.1)	Distance (genome v3.1 - bp)	eRNA peak name (genome v5.0)	Scaffold (genome v5.0)	Start (genome v5.0)	End (genome v5.0)	Closest gene (genome v5.0)	Distance (genome v5.0 - bp)	Sequence (genome v5.0)
Scaffold1:101849-102131	Scaffold1	101849	102131	WHL22.207	SPU_017128	CTCTCTTTTGCAGCAATAGAACTCTTTCCAACAATGTATGATGTGTATTGCCCCAAACTAGAAGACCGTAATTCAAATATGGCAAGATCAATGAAGAATACAGCATAAATAATGATGATTGCGGTAAGTACAATTTTAGTCTATTAATAACACCAATATTGCGCGAAATGGTTTTACAAATATTATCAATGTGTGGTTTCCATTTTTTCAAAAAGGACATCATCCGGATATAGATTATTCTTTCCAAAACTTTAGAAAATGAAGATAATAAAGAAATCGGGC	8920	NW_022145610.1:6277275-6278202	NW_022145610.1	6277275	6278202	LOC755803	0	CTCTCTTTTGCAGCAATAGAACTCTTTCCAACAATGTATGATGTGTATTGCTCCAAACTAGAAGACCGTAATTAAAATATGGCAAGATCAATGAAGAATACagcataaataatgatgattgtggtaAGTACAATTTTAGTCTATTAATAACACCAATATTGCGCGaaatgattttacaaatattatcaatGTGTGGTTTCCAAGAAAGTTTATCATCGACTGTTATACCCAAGAATTTGGTGAGAGGGACATGTTTCAAAGGGGTattgtcaaaaataatgtcagagGGTAATGAATCCAAAGAGTTACTAAATAGCATGTAGTTTGTTTTCTGGAGCTTAAGTGACAATTTATTCGCTTGTATCCATTGCAATATATTTAATAACTCGGCATTGATTT…
Scaffold1:1027596-1027957	Scaffold1	1027596	1027957	WHL22.362	N/A	TCATCTACAATCCTAAACCTAATCTAAACCCCAGACAATCCAAACCCTAACCCCATAACACTGACGGAACAAAGACCGTGTTGCGCTTGTTACCAGAGCATGATTAGTATGTCGGCTCACCGAACCGAAAGCACCGAGAAACGAGTACCATTCTCGTTGCTAAGGGGAACGCGACGCTTGTCGTACCGCCCCCTTGTTCGGAGCAACGTGCATTAACGTGGCCGTGTCAATTTTGTGTGAAGCAGAGTCGGCTGTCATATAATACCATGAAGATGTACTTGCTTGACCTACGGATTAGGATAGCATTCCATCTTATTGAGTCAATGTCAATCCGTATTGAGTCAATGTCAATCCGTATTAT	0	NW_022145545.1:1267355-1267698	NW_022145545.1	1267355	1267698	LOC115918126	0	ATAATACGGATTGACATTGACTCAATAAGATGGAATGTTCTCCTAATCTGCAGGTCAAGCAAGTCCATCTTCATGGTATTATATGACAGCCGACTCTGCTTCACACAAAATTGACACGGCCACGCTAATGCACGTTGCTCCGAACAAGGGGGCGGTACGACAAGCGTCGCGCTCCCCTTAGCAACCAGAGTGGTACTCGTTTCTCGGTGCTTTCGGTTCGGTGATCCGACATACTAAATATGCAGCTCCGGTGACAAACGCAACAcgggctttattttgtcaattttaTGGGGTTAGGGTTTGGATTGTCTGGGGTTTAGATTAGGTTTAGGGTTTTAGATAA
Scaffold1:1029417-1029697	Scaffold1	1029417	1029697	WHL22.362	N/A	AATTGCGGTTATATTTCTCCGATCCCAAATCAATATCGTTCATGTTTTGTATGTTGCAGTATAAGACTCTATAAGGTAACGGATTGTATTGTTTGGGATCGCTGTGGCAAATTGCCCTTAGGCGCTTATAAATAGTTGAAGTGACGGGATCAATAGTTAGATAAAACGAGAAAGGTGGACGCTTGTATTGTTTCGGTGCTAAGGAACATTTTGATGACAAGTTTTTTATTGATTAGAATGCCGAGAGAATGGGAACGTGCTGGAAAGATGTGACGAAAAC	0	NW_022145545.1:1265593-1265873	NW_022145545.1	1265593	1265873	LOC115918126	0	GTTTTCGTCACATCTTTCCAGCACGTTCTCATTCTCCCGGCATTCTAAtcaataaaaacatgtatttaaaatgttCCTTAGCACCGAAACAATACAAGCTTCCACCTTTCTCGTTTTATCTAACTATCGATCCCGTCACTTCAACTATTTATGAGCGCCTCAGGGCAATTTGCCACAGCGGCCTCAAACAAAACAATCCTTTACCTTATAGAGTCTTATACTGCAACATACAAAACATGAACGATATTGATTTTGGATGGGAGAAGATATAACCGCAATT
Scaffold1:1031528-1031559	Scaffold1	1031528	1031559	WHL22.362	N/A	GCCCACGTGGTGTTCATAACTCCCATAATCA	0	NW_022145545.1:1263735-1263772	NW_022145545.1	1263735	1263772	LOC115918126	0	TCATGAATAGTAAGGGAGTTATGAACACCACGTGGGC
Scaffold1:1042826-1043113	Scaffold1	1042826	1043113	WHL22.397	SPU_006396	ACTGAATCTTTGGTTTGTTGTCAATATGTCACAAAGTACTTTGCCCGTAAACACTACCCTTTGAAATTGATATACCGGTTGATGACTAAATGCTTCTAGTGCAGTAGATACAAAGATACAAGTAATTTGTAAATTGTTTTATTTTGCTCGAGTTGATAGAAGCAAGTATATCATTGCTCAAAGTCGTGTATGTGATGCTTGAAATGACTATGTTTGGTTGTTTACAGTGAGGTGATCCCAGCAGTGACCATGTTTGAGAAGAGGGCAGTCAGACCTACGCCATGGAA	0	NW_022145613.1:6563798-6564085	NW_022145613.1	6563798	6564085	LOC583472	0	ACTGAATCTTTGGTTTGTTGTCAATATGTCACAAAGTACTTTGCCCGTAAACACTACCCTTTGAAATTGATATACCGGTTGATGACTAAATGCTTCTAGTGCAGTAGATACAAAGATACAAGtaatttgtaaattgttttattttgctcGAGTTGATAGAAGCAAGTATATCATTGCTCAAAGTCGTGTATGTGATGCTTGAAATGACTATGTTTGGTTGTTTACAGTGAGGTGATCCCAGCAGTGACCATGTTTGAGAAGAGGGCAGTCAGACCTACGCCATGGAA
Scaffold1:1051912-1052077	Scaffold1	1051912	1052077	WHL22.397	SPU_006396	ACCAACTTACTCAACAGTACCTGTCATTTTATGACATAAGGCTGAGAATGTTGATGAGATTATGATATTTTCTTCGCATAAGCATGTCCTTGCACTGGATTTGATTTCTGTAGTATTGATTTGAACAATTCTGTAATTTAAAAAAAAAATGTTGTTTATTTTCTA	0	NW_022145613.1:6572884-6573049	NW_022145613.1	6572884	6573049	LOC583472	0	ACCAACTTACTCAACAGTACCTGTCATTTTATGACATAAGGCTGAGAATGTTGATGAGATTATGATATTTTCTTCGCATAAGCATGTCCTTGCACTGGATTTGATTTCTGTAGTATTGATTTGAACAAttctgtaatttaaaaaaaaaatgttgtttattttcta
Scaffold1:1056543-1056881	Scaffold1	1056543	1056881	WHL22.397	SPU_006396	CTTTCAGGAAAGTCCAAACACCCTCGGCTATTGCCTCGGGCGTGTTAGCTTGTTCCAAAGGTACCCTGTGTGGGTAATTCTTACAAATGCCCTCACTGCTGTGTATTATTTGTATATTCATGCAATATTCTGGAAATTGAAATATATTTATATTGTTAATAATACTTGCCCAGCTTTCGTAGCCATGAGTTAAGTGTTGAATAATTTTAGTTAGACCAACAACTCTGGAAATAATGTATGGTGACCCTTCTCTAAACTTACAGAGAAATATATTCATTTGAAAATAAAATCCAAGAGTTTGGAAAGGCTTGAGGTTTGTTGGAGATCTGATACTGGGG	0	NW_022145613.1:6577515-6577853	NW_022145613.1	6577515	6577853	LOC583472	749	CTTTCAGGaaagtccaaacaccctcggctattgcctcgggcgtgttagcttgttccaaaggtaccctgtgtgggtaattcttacaaatgccctcactgctgtgtattatttgtatattcatgCAATATTctggaaattgaaatatatttatattgttaatAATACTTGCCCAGCTTTCGTAGCCATGAGTTAAGTGTTGAATAATTTTAGTTAGACCAACAACTCTGGAAATAATGTATGGTGACCCTTCTCTAAACTTACagagaaatatattcatttgaaaataaaatccaaGAGTTTGGAAAGGCTTGAGGTTTGTTGGAGATCTGATACTGGGG
Scaffold1:1060751-1061279	Scaffold1	1060751	1061279	WHL22.397	SPU_006396	AGGAAATATATCATTTACCAAATATATCATTTTTAACATGGAGCCCGCGGGCCCTTTGCCCCCCCCCCCCCCACACCACACACACACCCACCCCCAAACAACATCCGCCACTGTAAAAAGTAAATGGAATTTTCATACGAGAGAGCTACATTGTAAAACGTGTGGGTTTAAAGAGTTGAATTGCGGACAGTGATTCCTGAATCCGCGTACAACAAACTGAGAACTCCCACCCGTAGAGAAAAAGAAGTAACTAAGCCTATTCACAGAGAGGTACTAATCGGAACCCTTAACCACTTTCTAATTTTCAGAGCTGAACAAAAGGCTCTGTGATAATCTCTTGTACATTGTACATTTGTAATTGTTCCCCTATACATCATACCGGGAGGTCTTGGTTCATAG…	793	NW_022145613.1:6581723-6582251	NW_022145613.1	6581723	6582251	LOC583472	4957	AGGAAATATatcatttaccaaatatatcatttttaacATGGAGCCCGCGGgccctttgccccccccccccccacaccacacacacacccacccccAAACAACATCCGCCACTGTAAAAAGTAAATGGAATTTTCATACGAGAGAGCTACATTGTAAAACGTGTGGGTTTAAAGAGTTGAATTGCGGACAGTGATTCCTGAATCCGCGTACAACAAACTGAGAACTCCCACCCGTAGAGAAAAAGAAGTAACTAAGCCTATTCACAGAGAGGTACTAATCGGAACCCTTAACCACTTTCTAATTTTCAGAGCTGAACAAAAGGCTCTGTGATAATCtcttgtacattgtacatttgtaaTTGTTCCCCTATACATCATACCGGGAGGTCTTGGTTCATAG…
Scaffold1:1064274-1064490	Scaffold1	1064274	1064490	WHL22.397	SPU_006396	CGAGTATTAGAATAAATCACAACTCCCTCCAAACGTTGACACTAATAATGAATAATGGGCGTACAGACAGCACCACCAACAAAAGACAAGGGCGATGACACTCATTAGAGAGAGAGAAAAAAAGGAAAGAGAGAGAGGGGAGGGAGTGAGGGAGAGAGAGAGAGAGAGAGAGAGAGAGAGAGAGAGAGAGAGAGAGAGAAGGGGAGAGAGTTAGGT	4316	NW_022145545.1:1231839-1231848	NW_022145545.1	1231839	1231848	LOC593186	4760	TAATACTCG
Scaffold1:1065607-1066149	Scaffold1	1065607	1066149	WHL22.397	SPU_006396	GGAGTCGAGATATGATTTCTTGATTATTACCCTGATTATGGGGACTGACCTAGAAGGCCAACCATAGGATGGATGTTGACTTGAACCCGGATAGGTTTATAGGAAGACAAATGATATGACCACTATATCTATTCGCACATCCCTCGCAGACAAAGACATTGCTTTACAATGGCCTATTGGCAAAATGATGAATGCATCTGCAGGAGGGAGAGGGGGCTTCGAATATGGGTGGGTGGGGCCCGTGGGGGGGGGGGGGGTCATGGGACGTTGCTTTAATTACTTCATCACACAACTCATACAACCAAGAAGTGTAACAAATAAATGGATTCGAGACTCACCGGACTCGTAAAACGTTCGCTTCGTCTGAATCACGATCACCGCTTGGCATTGTCCAAGCTA…	5649	NW_022145613.1:6586581-6586752	NW_022145613.1	6586581	6586752	DVR1	7217	GGAGTCGAGATATGATTTCTTGATTATTACCCTGATTATGGGGACTGACCTAGAAGGCCAACCATAGGATGGATGTTGACTTGAACCCGGATAGGTTTATAGGAAGACAAATGATATGACCACTATATCTATTCGCACATCCCTCGCAGACAAAGACATTGCTTTACAATG
Scaffold1:1066216-1066390	Scaffold1	1066216	1066390	WHL22.397	SPU_006396	CGACTTGAAGTAAATCGACATCATTTTTTGAATGGCTTGGGTGCTTCCATCCGGAAAGTGTTTTCTTAAATGTGTAGAATACAGAGATTGTTCTTTTACAAAATGAAAACAAAAAGAAGGAGGTAGTAATGTTTTTTCTCTCTCCGTTAATTTTTTTCATTACTCTTAATTACG	6258	NW_022145545.1:1229713-1229887	NW_022145545.1	1229713	1229887	LOC593186	6721	CGTAATTAAGagtaatgaaaaaaattaacggagagagaaaaaacattaCTACctccttctttttgttctcattttgtAAAAGAACAATCTCTGTATTCTACACATTTAAGAAAACACTTTCCGGATGGAAGCACCCAAGCCATTCAAAAAATGATGTCGATTTACTTCAAGTCG
Scaffold1:1066625-1066805	Scaffold1	1066625	1066805	WHL22.400	SPU_002662	TTTCTCCAGGAGGTGGGGGTACACATGTTCTATAATCCATTTTCCGTTGTGTACAATCATTGTAGGACTCTGCCAATATACATGACGTAATGGCCTTAAATTAAGTCGTGAACAGATGCACATGTTTACTATGTAGATGACAACTGTCTGATATCAGTAGCAAAAACGGTCATAGAGGTT	5960	NW_022145613.1:6587598-6587778	NW_022145613.1	6587598	6587778	DVR1	6191	TTTCTCCAGGAGGTGGGGGTACACATGTTCTATAATCCATTTTCCGTTGTGTACAATCATTGTAGGACTCTGCCAATATACATGACGTAATGGCCTTAAATTAAGTCGTGAACAGATGCACATGTTTACTATGTAGATGACAACTGTCTGATATCAGTAGCAAAAACGGTCATAGAGGTT
Scaffold1:1071134-1071456	Scaffold1	1071134	1071456	WHL22.400	SPU_002662	AACATGAACACCCAACAGACCTGAGTCTGCGAATACCCATTGCGGCGGTCTCTGCCTAACATTTTCTTACAAACTAAAATTTGAGCGCGCGGGCGCCGCAAGGAAACAGTCTGCTCAACCAATTAGAGGCGGGGATGTATCGTCTGCAAATTTCATTTCATTTATTTGATATTACCAGGCAGGTACGTTGATACTAAACTGTGCCTCACCATTATCAGGTGTTTGTATAAGCGTCAGGAAATTATGCGCAGTTATTAGTGTATAGTAATTATGTGAGTCATGGACGGTCGATAACTTGCACGCATGAAGGCGTGGATATTCT	1309	NW_022145613.1:6592106-6592428	NW_022145613.1	6592106	6592428	DVR1	1541	AACATGAACACCCAACAGACCTGAGTCTGCGAATACCCATTGCGGCGGTCTCTGCCTAACATTTTCTTACAAACTAAAATTTGAGCGCGCGGGCGCCGCAAGGAAACAGTCTGCTCAACCAATTAGAGGCGGGGATGTATCGTctgcaaatttcatttcatttatttgatattACCAGGCAGGTACGTTGATACTAAACTGTGCCTCACCATTATCAGGTGTTTGTATAAGCGTCAGGAAATTATGCGCAGTTATTAGTGTATAGTAATTATGTGAGTCATGGACGGTCGATAACTTGCACGCATGAAGGCGTGGATATTCT
Scaffold1:1093281-1093384	Scaffold1	1093281	1093384	WHL22.400	SPU_002662	TGATTGCCCTTTTCTCTCTGAGATATTTGAATATGTATAGGATGGTCAATTTGCCCCTGACTGATGTATTGAAGGTCAGAATAAAGGGATGAAAATTAGCCCG	0	NW_022145545.1:1203376-1203479	NW_022145545.1	1203376	1203479	LOC764641	22692	CGGGCTAATTTTCATCCCTTTATTCTGACCTTCAATACATCAGTCAGGGGCAAATTGACCATCCTATACATATTCAAATATCTCAGAGAGAAAAGGgcaatca
Scaffold1:1192388-1192734	Scaffold1	1192388	1192734	WHL22.527	N/A	AATGCGCAAAGGAAAGTGAACATGAAAATGCCTACAGAAGTATTGCGGATTAACTGCAAAACGCTTTAAGTCTAAATCTCCTTTCATTGTTCTGTTAAGAAGATTTGTCCATTGTGAACATTTCCGTCTTTACTTCTAAATAAAATCCGTATTTAGAAGAAGAAAATACCATGACAAATACATATATGTTTAAAGCGACTTTTGCCAAAGATGAGTATGACATACCATTTATAATATCAATGTCCACATACATGGATTGTTATCAAACGTATCGTTATGGGCCTCAGGATCAAGGGTCGGACCTTTTATAAGTTCGTTCAAGTAATGCGTAGTAACTACAGGATAG	0	NW_022145545.1:1097109-1097468	NW_022145545.1	1097109	1097468	LOC115918717	0	CTATCCTGTAGTTACTACGCATTACTTGAACGAACTTATAAAAGGTCCGACCCTTGATCCTGAGACTCAGGCCCATAACGATACGTTTGATAATAATCCATGTATGTGGACATAGATATTATAAATGGTATTTCATACTCATCTTTGGCAAAAGTCGCTTTaaacatatatgtatttgtcatgtttttttcttcttctaaatgcGTTCGACGGATTTTATTTAGAAGTAAAGACGGAAATGTTCACAATGGACAAATCTTCTTAACAGAACAATGAAAGGAGATTTAGACTTAAAGCGTTTTGCAGTTAATCCGCAATACTTCTGTAGGCATTTTCAAGTTCACTTTCCTTTGCGCATT
Scaffold1:1441192-1441414	Scaffold1	1441192	1441414	WHL22.5361	N/A	CATCAAATGTAGCATACACCCTGTACATGACATGTCCCAAGAACAGAGCTCCTGGGCAAATACTTTGGCAACTGTTCAAGAGAGTGTGGGGAATCTTTGTCCCTGGTATAACAAGAGTAACCACAGAGTATACAGGTACTGTACACAAACAAGATAATGGAAAATCCTGATCCACAATTAACAGTGACTATATACGCAACAGACATGCATTCACACTGCACG	0	NW_022145611.1:16214923-16215141	NW_022145611.1	16214923	16215141	LOC100890259	0	CGTGCAGTGTGAATGCATGTCTGTTGCGTAGTCACTGTTAATTGTGGATCAGGATTTTCCATTATCTTGTTTGTGTACAGTACCTGTATACTCTGTGGTTACTCTTGTTATACCAGGGACAAAGATTCCCCACACTCTCTTGAACAGTTGCCAAAGTATTTGCCCAGGAGCTCTGTTCTTGGGACATGTCATGTACAGGGTGTATGCTACATTTGATG
Scaffold1:1502230-1502680	Scaffold1	1502230	1502680	WHL22.5424	SPU_007387	CATGTGAATATAGAAGGGTACAACAAACAAGACACTAGAGAACTACCAAATGAAGATCCAAGTCCAAGTTGCCTTCAATAGAGTACAAAGATTGACGTCAAAGTCACGTCATACTAGCTAAGTTGTCAAGGTTGATGGTTCCAAACAATGTTGTGCTAAATAATGGCATGGTGCATGAGCATGCACAACAGCACCAAACACTGAATTTGCACTGCTCCAGCCTGTCGCTTGAACAATTTCGGAGTGAACCTCATACCATTAAATGTTCTGTTGTTTGGAACCAGCAACCTGAACAATGAGGGAGTATGACGTTAGCACTTTGGTACTCTATGCCTCAACCATCACATTGTTCTCTACATGAATCTATTTGCTCACAATTCCAAACAATGCAAAATACTC…	922	NW_022145613.1:6877588-6878038	NW_022145613.1	6877588	6878038	LOC587883	0	ggtaactacagtacatacatgcatgtatattattttcaggTAGTTTTGCTTGAGTATTTTGCATTGTTTGGAATTGTGAGCAAATAGATTCATGTAGAGAACAATGTGATGGTTGAGGCATAGAGTACCAAAGTGCTAACGTCATACTCCCTCATTGTtcaggttgctggttccaaacaacagAACATTTAATGGTATGAGGTTCACTCCGAAATTGTTCAAGCGACAGGCTGGAGCAGtgcaaattcagtgtttggtGCTGTTGTGCATGCTCATGCACCATGCCATTATTTAGCACAACATTGTTTGGAACCATCAACCTTGACAACTTAGCTAGTATGACGTGACTTTGACGTCAATCTTTGTACTCTATTGAAGGCAACTTGGACTTGGATCTTC…
Scaffold1:1579738-1579963	Scaffold1	1579738	1579963	WHL22.5759	SPU_002011	GAGTCTGACCTATCCTTTCATGTCCAACACAATCACCGTCTCGTGTATTTGGATCGCACATTGTTGTGTCTAATTGCGATAATCTCGTATTTGTAAGGTCATCCATTGTGATGGCGTGGATATCAATAAGCTTGATTTTATAGAGGTGTGAGCCCTTGATAGATCCATTTACAATCCTGTCTAGTGGAACGTAAACATATTTACTCGAGATTTCGCTTCATCTGC	0	NW_022145611.1:15749532-15749757	NW_022145611.1	15749532	15749757	LOC105440661	1048	GCAGATGAAGCGAAATCTCGAGTAAATATGTTTACGTTCCACTAGACAGGATTGTAAATGGATCTATCAAGGGCTCACACCTCTATAAAATCAAGCCTATTGATATCCACGCCATCACAATGGATGACCTTACAAATACGAGATTATCGCAATTAGACACAACAATGTGCGATCCAAATACACGAGACGGTGATTGTGTTGGACATGAAAGGATAGGTCAGACTC
Scaffold1:1581453-1581791	Scaffold1	1581453	1581791	WHL22.5759	SPU_002011	AGTGACACAAATGTACAGGTAAGTAGCGGACGGAGCTCAATGGGGCTCTTATAAGTTATTTGCATCCACTACTATAGATACACAGTGTTTATTCTTAGCTCCTGTGTAACTTTAGGATCAATAACACAACAAAAGCACACCGGAGCTGCAGCAATCAGGGTCTTATAGCTATTGGTGAGAAGAGCAGACAATGCAGGGAGAAGAATTGAAGGAGAAGTGGATTCATTCAAAAGAAAGCGGATTGGAGGAAGAAAACAAAATAATCGATGGCACCTTAGTGACCAGTTACTAAAGCGGGCGGTTGTAATGGGGGTAATAATGCTGGTGCCACTGGATCT	0	NW_022145613.1:6831697-6832035	NW_022145613.1	6831697	6832035	LOC100890540	0	AGATCCAGTGGCACCAGCATTATTACCCCCATTACAACCGCCCGCTTTAGTAACTGGTCACTAAGGTGCCatcgattattttgttttcttcctccaaTCCGCTTTCTTTTGAATGAATCCACTTCTCCTTCAATTCTTCTCCCTGCATTGTCTGCTCTTCTCACCAATAGCTATAAGACCCTGATTGCTGCAGCTCCGGTGTGCTTTTGTTGTGTTATTGATCCTAAAGTTACACAGGAGCTAAGAATAAACACTGTGTATCTATAGTAGTGGATGCAAATAACTTATAAGAGCCCCATTGAGCTCCGTCCGCTACTTACCTGTACATTTGTGTCACT
Scaffold1:1586934-1587325	Scaffold1	1586934	1587325	WHL22.5759	SPU_002011	CGCCTAGCAAAATGTTTTAAAAAAGAAGGAACTACTCCGAAAACAATATTTTAAACAAGAAAAAACCATAGCCCTAACATATTTAAAGTTTTAAACTTTGTCCATTTCCGCCAAATTTGAATTTGTAAAAAGTATCTAGACTACATCAGTAGTATGAATTTCAGACAACTCGCCCTGGACAACTCGACACAATACCCTGGACATCTCGCCACAATACCCTGGACAACTCGACCGTGACGATTTGTCCAGGGTATTGTGTCGAGCTGTCTTTGTGGCGAGTTGTCTGGACTCCTAAATGTACATGTAAACCCTGCACTTGGATGTACGAGTATAAATTTGGGTGTTGGAAAAATCGGGGTTAAGTTTTCTCTAAAAGAGGATCCGAGACATT	0	NW_022145613.1:6825977-6826581	NW_022145613.1	6825977	6826581	LOC100890540	0	aatgtctcGGATCCTCTTTTAGAGAAAACTTAACCCCGATTTTTCCAACACCCAAATTTATACTCGTACATCCAAGTGCAgggtttacatgtacatttaggagtccagacaactcgccacaaagacagctcgacacaataccctggacaaatCGTCAcggtcgagttgtccagggtggggtgccttTTCGAACAgctcgccacacttttttcccctcatgatttctaTCCCtcactgtgtttataaaagaataatgaatacataaaatgacaatttcatctaagatgagggattttagatctagaaatcatgagggggaaaaaagtgtggcgagctgtccgaaaaggcaccccaccctggacaactcgccatagcgagttgtccagggtattgtggcga…
Scaffold1:1589896-1590164	Scaffold1	1589896	1590164	WHL22.553	SPU_009911	CAACGAAACCATACTCGAGACGAAACCATTATCTCTATTGTCACGCAGCTGTGGTAATTGACAAAAGAGCATTTATACGCTTCATTTGTGAAGCTTTCCAGAAAGGTATATCCTCCACCACACAAGACTATCACTTCTATTGTGACCGGTGTCATCATCAGACAACGCAAACCTAAATGCCTGTGTGCGCTCCCTTTTGTTATCTCGAGACAGCTTAATTATCGACATCGGCTGTCCCGAAAAGCCACCTAGCGGATCCTTTCTAATC	0	NW_022145611.1:15747400-15747668	NW_022145611.1	15747400	15747668	LOC577374	115	GATTAGAAAGGATCCGCTAGGTGGCTTTTCGGGACAGCCGATGTCGATAATTAAGCTGTCTCGAGATAACAAAAGGGAGCGCACACAGGCATTTAGGTTTGCGTTGTCTGATGATGACACCGGTCACAATAGAAGTGATAGTCTTGTGTGGTGGAGGATATACCTTTCTGGAAAGCTTCACAAATGAAGCGTATAAATGCTCTTTTGTCAATTACCACAGCTGCGTGACAATAGAGATAATGGTTTCGTCTCGAGTATGGTTTCGTTG
Scaffold1:1596169-1596363	Scaffold1	1596169	1596363	WHL22.770	SPU_002010	GAATGCAATCGCAATATACAAAGAATTATGCTCTTAAAATTTGGTGCCCAGAAACTTCTTATTAATGACTAAAACGCTCTGCACAAAGTTGTTTACATGTATTGTGAGCGCACAGCGCAGTCAGTGACGCAACAATACATGCGCATCTGAAAACATGCGGCCTTATATCTAAAAGTTCGTTCAACCATGCAGGC	2420	NW_022145613.1:6820422-6820616	NW_022145613.1	6820422	6820616	LOC115918355	937	GCCTGCATGGTTGAACGAACTTTTAGATATAAGGCCGCATGTTTTCAGATGCGCATGTATTGTTGCGTCACTGActgcgctgtgcgctcacaatacatgtaaacaacTTTGTGCAGAGCGTTTTAGTCATTAATAAGAAGTTTCTGGGCACCAAATTTTAAGAGCATAATTCTTTGTATATTGCGATTGCATTC
Scaffold1:1628333-1628483	Scaffold1	1628333	1628483	WHL22.1024	SPU_002020	TGATTATTTATTTTTACAGATCAATGCGAAGCAGGCCGATTTTCAACATCCGGCTTATCTCCTTGTATCCAATGCCCCCTGCACACGTTCCAGTCGCTGATTGGACAGACGATGTGCTTTGAATGCCCGGATGGAAGAAAGACATGGAAC	0	NW_022145613.1:6791044-6791193	NW_022145613.1	6791044	6791193	LOC115919782	0	GTTCCATGTCTTTCTTCCATCCGGGCATTCAAAGCACATCGTCTGTCCAATCAGCGACTGAAAGGTGTGCAGGGGGCATTGGATACAAGGAGATAAGCCGGATGTTGAAAATCGGCCTGCTTCGCATTGATCTGTAAAATACATAATCA
Scaffold1:1662452-1662817	Scaffold1	1662452	1662817	WHL22.1417	SPU_026944	ACGTCGTAGAGGGCCACCAAAGGGCCCCCACAAAGACTAGTTTTTATCCAGATACTTGTATTTCTATCTATATTAATAATTTCCAAACGAAAACATATCGAATGCCAAAATTTGAACATAATAAATCATCAATGATAATTGGTTAATTAATAACGCTTTAAGAAATCATTTTTTTTGAAAATATCAAATATAGTTCGACATACTGTTTTTTATAAAAAAATTCATTAGAGCAAGTCTCCAAAACTAGACCAAACATGACGTCCGCGCTCGCTCGCCAGAGCTCTGTATACGTTTACACGTTAGTCAGTATACAGTGCAGTGCATGCAGTGTACTTGTGTATGGGTGGTATACAGGTTACACGTCA	0	NW_022145613.1:6759663-6760028	NW_022145613.1	6759663	6760028	LOC115918353	0	TGACGTGTAACCTGTATACCACCCATACACAAGTACACTGCATGCACTGCACTGTATACTGACTAACGTGTAAACGTATACAGAGCTCTGGCGAGCGAGCGCGGACGTCATGTTTGGTCTAGTTTTGGAGACTTGCTCTAatgaatttttttataaaaaacagtATGTCGAactatatttgatattttcaaaaaaaatgatttcttaAAGCGTTATTAATTAACCAATTATCATTGATGATTTATTATGTTCAAATTTTGGCATTCGATATGTTttcgtttggaaattattaatATAGATAGAAATACAAGTATCTGGATAAAAACTAGTCTTTGTGGGGGCCCTTTGGTGGCCCTCTACGACGT
Scaffold1:16645-16784	Scaffold1	16645	16784	WHL22.47	SPU_016802	CGTCAAATGATCACCCTTTTCGTTCGTCAAGTCAGCAGTCTTGATCTGAAATAAACAATTGAAAGATGAGGCTTGAATACGCTGAATTAAATCCTGATTTTAGGATCTGTCATTTAGGGAGAGGGACGCTTTTAGAGGA	0	NW_022145601.1:22346786-22346925	NW_022145601.1	22346786	22346925	LOC100887917	0	TCCTCTAAAAGCGTCCCTCTCCCTAAATGACAGATCCTAAAATCAGGATTTAATTCAGCGTATTCAAgcctcatctttctattgttTATTTCAGGTCAAGACTGCTGACTTGAAGAACGACAAGGGTGATCATTTGACG
Scaffold1:1740006-1740191	Scaffold1	1740006	1740191	WHL22.775	SPU_021893	TGGAACATGCATGTGCCTTCAGAACACTATGCCCCAGATTGTTAACACGTGGCAGTTGATGGCACCAGTATATTCAGAGAGTTCTGTTTACCGGTTCAATAACTTTCAATTACCACCAAATATTGACTCTAGGTTTCAGCAGTATTGTCACAGCCAGTAGAGCAATTGTTGCCGGTATGAGTGTG	0	NW_022145598.1:16879399-16879584	NW_022145598.1	16879399	16879584	LOC587169	0	CACACTCATACCGGCAACAATTGCTCTACTGGCTGTGACAATACTGCTGAAACCTAGAGTCAATATTTGGTGGCAATTGAAAGTTATTGGACCGATAAACAGTGCTCTCTGAATATACTGGTGCCATCAACTGCCACGTGGTAATAATTTGAGGCATAGTGTTCTGAAGGTACATGCATGTTCAA
Scaffold1:1874728-1874764	Scaffold1	1874728	1874764	WHL22.860	SPU_006127	CAGTGAACTTGGTACACGGTTTGATAAATAATCCAG	72232	NW_022145606.1:11435484-11435520	NW_022145606.1	11435484	11435520	LOC115927220	19800	CAGTGAACTTGGTACACGGTTTGATAAATAATCCag
Scaffold1:1878649-1878999	Scaffold1	1878649	1878999	WHL22.860	SPU_006127	ATTCAGTAGCCCACCACTAAGTACAACAGGGTTACACACAAAAAATGATTTTCAAATTCAGAAAATGGTGCTTCTGTGATTAAACTTTCTCATCATTCGCAATCTTGAGTATGTGAAATACAAACAGGGCATAGAGGATCTCCTCAGGAAAGGCTATGCAGAGGAAGTTAGTGAGGAGACTAGGCAACCCAAGGACACCCCTGTTTGGTATTTGCCCCACCATCCAGTCTTGAATCCCCAAAAACCAGACAAGATGCGAATCGTGTTCGATTGTGCGGCCAAGCACCAAGGGGTATCTTTGAATGATGCAGTGTTACAGGGGCCGGACCTTATAAACAATTTGATGGGAG	67997	NW_022145596.1:18280710-18280883	NW_022145596.1	18280710	18280883	LOC100889508	0	CTCCCATCAAATTGTTGATAAGGTCCGGCCCCTGTAACACTGCATCATTCAAAGATACCCCTTGGTGCTTGGCCGCACAATCGAACACGATTCGCATCTTGTCTGGTTTTTGGGGATTCAAGACTGGATGGTGGGGCAAATACCAAACAGGGGTGTCCTTGGGTTGCCTAGTC
Scaffold1:2078595-2078771	Scaffold1	2078595	2078771	WHL22.1090	SPU_027231	TGTTCTATCACCTTCTCTTATGTTATTCTTAAGGACAACAGCTAGCCCCGTTCCTAAACTGCTATAGTCATGTGACCTAACATTGCGAAGTGTCAGCTGCGAACGTTTATATAAACCCAAAACGCCAAATTACACCCAAAAATCACACTTCAGTTTGGAATGTTTCGGGCTTGGCA	0	NW_022145602.1:6172330-6172506	NW_022145602.1	6172330	6172506	LOC100893134	0	TGCCAAGCCCGAAACATTCCAAACTGAAGTGTGATTTTTGGGTGTAATTTGGCGTTTTGGGTTTATATAAACGTTCGCAGCTGACACTTCGCAATGTTAGGTCACATGACTATAGCAGTTTAGGAACGGGGCTAGCTGTTGTCcttaagaataacataagagaaggtgatagaaca
Scaffold1:2090215-2090254	Scaffold1	2090215	2090254	WHL22.1090	SPU_027231	ACCCTCATATTCAAAATATGACAATGTACAGCTAAAGGT	0	NW_022145558.1:1954050-1954089	NW_022145558.1	1954050	1954089	LOC115927903	19369	ACCTTTAGCTGTacattgtcatattttgaatatgagggt
Scaffold1:424105-424252	Scaffold1	424105	424252	WHL22.1900	SPU_009849	CTCGTAGCTTTACCCTCGCTTTGGCTGAACTGCACCTGAGCCCTTCCCGCATGACGTTTTAAACGTTGACATCTCGCGAGGAAATCGCTAATTTCCACGCTAACTTCCCCTGCTCTCTAGGCAGACTTCCCGGGCCATGCCGAGGTT	0	NW_022145614.1:26057544-26057691	NW_022145614.1	26057544	26057691	LOC593733	0	AACCTCGGCATGGACCGGGAAGTCTGCCTAGAGAGCAGGGGAAGTTAGCGTGGAAATTAGCGATTTCCTCGCGAGATGTCAACGTTTAAAACGTCATGCGGGAAGGGCTCAGGTGCAGTTTAGCCAAAGCGAGGGTAAAGCTACGAG
Scaffold1:439363-439741	Scaffold1	439363	439741	WHL22.1900	SPU_009849	CTCCTGAGTCATACAGTTCTGAAAAATTGACATTTTAGTAATTTGGTGTCTTGGAAGGAATGGGAAAGTTGCCCGCCACTACATCACAGAGACGTTACTGATTCAGCCAATTTGAAGAGCAAATACCTAAAGTGATTAGTCGATTACAACTTAATACAAAATAAATAAATAATAATTTTCTCCTTTTTTGTCCAATTTGATTCATACTGTCACTAGTCCACTTCTCTGAGTTGTGTGCTTTATTATGGAGTACTTTGCTATCACATTTAGATTTCCCTTTAATCATGAATTATCTGATCACTTGAGAATTCATTAGTGGGTTCTAGTATAGGGAGAGGTCTACGACCATATTAGGGCAGACAGTTGGTGGGGGAAGAG	0	NW_022145614.1:26041061-26041439	NW_022145614.1	26041061	26041439	LOC593733	0	CTCTTCCCCCACCAACTGTCTGCCCTAATATGGTCGTAGACCTCTCCCTATACTAGAACCCACTAATGAATTCTCAAGTGATCAGATAATTCAtgattaaagggaaatctaaaTGTGATAGCAAAGTACTCCATAATAAAGCACACAACTCAGAGAAGTGGACTAGTGACAGTATGAATCAAATTggacaaaaaaggagaaaattattatttatttattttgtattaagttGTAATCGACTAATCACTTTAGGTAtttgctcttcaaattggctgaatcagtaacgtctctgtgatgtagtggcgggCAACTTTCCCATTCCTTCCAAGACACCAAAttactaaaatgtcaatttttcagaactgtatgactcaggag
Scaffold1:468060-468282	Scaffold1	468060	468282	WHL22.1900	SPU_009849	AAGTCCAAACAAACATGTACAGTACATGTAGATAACAATTTCTCGGAAATAAATATAGTGGCATACTGTCTGTACATGTACATGCATGTAGATGGCAATAACATATTTTTGCAGGTTTGTGCTTATGTACCAGCATTTTAAATCTGCACTTCAACCTTACTTGTATTTTTAGATCACATCATTTTTACGAGGAAATACACGTTCATGTACATGTAGGCCTAC	0	NW_022145614.1:26012336-26012559	NW_022145614.1	26012336	26012559	LOC593733	0	gtaggcctacatgtacatgaacgtGTATTTCCTTGTAAAAATTATGTGATCTAAAAATACAAGTAAGGTTGAAGTGCAGATTTAAAATGCTGGTACATAAGCACAAACCtgcaaaaatatgttattgccatctacatgcatgtacatgtacagacagTATGCCCACTATATTTATTTCCGAGAAATtgttatctacatgtactgtacatgtttgtttgGACTT
Scaffold1:485253-485636	Scaffold1	485253	485636	WHL22.1948	SPU_025520	CTGGACTAAAAAAGAATAGGAAGAATAGACATAAGAGATTCTTTTTCTACAAATAAAGCAAGGTAAGGCTAGTACCAATATACAGAAGTCATGAGCTTTAGGGCGCGTTCATGCTTGATTTTGACGGCCAGAATCAGGCATCTGTTACGCGTTTAGTTTAAAACACGGTTGCGTCTTAGCTCACTTTTGTAGAATCACCGAAAAACGGCGATCACGATCGCCGATCGTAAACTCACAAAAAGATGCGTTTACAATTTGTAAACGCGTTTAAATGGGGTCAACGCACTGACCTCTAGTGGGTCTACGTAGCATGCACAGTGAAGGTTTGCGAATCCAGCTGGAAGACCATTAAGGCCACACACGGAGAATTGCCTGGGGAGCCA	104	NW_022145614.1:25996422-25996523	NW_022145614.1	25996422	25996523	LOC575037	1846	CTAAAGCTCATGACTTCTGTATATTGGTACTAGCCTTACCTTGctttatttgtagaaaaagaATCTCTTTTGTCTATTCTTCCTATTCTTTTTTAGTCCAG
Scaffold1:578279-578489	Scaffold1	578279	578489	WHL22.1022	SPU_006634	TGCCTATGCCAGCCTGTGTTGAACTTATTCCGCTAGATTTTAGCCGCTAGGCCCCTCCCACAAACTTGCCACGGCCGTATTGTTATGCCCCCAAAATCCCCCAAAATGTCATTTTACCTTGTTCATTTCCAATTTTAAATTAGGCCTAGGCTATAATACATCGGTTCCATTTACTAACTGGATTGATATTGTAACGGGTTTTGTCCGGGG	931	NW_022145605.1:38490655-38490658	NW_022145605.1	38490655	38490658	LOC115926509	7201	CCC
Scaffold1:626388-626744	Scaffold1	626388	626744	WHL22.364	SPU_007235	TGAGGATAAAAAAGAGAAATCTCTCAAGCGCAGAATTTCACACCTGACTCATCCGTGGGCGTTTGCTCATGAATATTCATAAAGCAGGTGTCAACGAGCAATCAATTTGAATCGATAGGCGTAGTATTGAGCTCATTATGTAAATCCTGGGTAATCTCAAGAGGAATTACGTGTCGGATCTTCTTCTTCAAGGATCAAAATCTCATTTGTCTCTGCCTTGAGATGGACAATATGGACAACGTGGACAAATTTACTTAGATCTCTCTCTCTCTCTCTCCCCCTCTCTCTCTCTCCTTCCTTCCACCTTCTCTCTTTATATCTCCACCTCTTCTGTCAGTCTCTATGTCCCTCCTCAT	0	NW_022145545.1:1622236-1622592	NW_022145545.1	1622236	1622592	LOC115924977	16944	ATGAGGAGGGACATAGAGACTGACAGAAGAGGtggagatataaagagagaaggtggaaggaaggagagagagagagggggagagagagagagagagatctaagTAAATTTGTCCACGTTGTCCATATTGTCCATCTCAAGGCAGAGACAAATGAGATTTTGATCCTTGAAGAAGAAGATCCGACACGTAATTCCTCTTGAGATTACCCAGGATTTACATAATGAGCTCAATACTACGCCTATCGATTCAAATTGATTGCTCGTTGACACCTgctttatgaatattcatgagcaaacGCCCACGGATGAGTCAGGTGTGAAATTCTGCGCTTGAGagatttctcttttttatcCTCA
Scaffold1:641270-641596	Scaffold1	641270	641596	WHL22.364	SPU_007235	GACAAACAGTCTTTTCGTTGTATTTTGTCGAACATCGATCAACCGTATTTTGCATCTTGGGGAATCAATTATTACAAAACAAAAATTCCAATCTGGTATTACAGCATACTCTGCAACATAATGTACGTCGCGTGATGCAGGATGTGCCAAATAAGTGGCGCCACTTGTGTCCATTCATTATAGAAAATCACGTGACATGAAATCTAAACCACGTGATCTTTTTACCGGCGTCTCTAATGGTTTATTTGGCTTGACGAAGGGAAAGGCCGCTCAACCAATGGGGAATTAAGTCATGAATAAGACATTTGCAGAAATAATTCAAGGAC	0	NW_022145545.1:1607251-1607577	NW_022145545.1	1607251	1607577	LOC582454	7330	GTCCTTGAATTATTTCTGCAAATGTCTTATTCATGACTTAATTCCCCATTGGTTGAGCGGCCTTTCCCTTCGTCAAGCCAAATAAACCATTAGAGACGCCGGTAAAAAGATCACGTGGTTTAGATTTCATGTCACGTGATTTTCTATAATGAATGGACACAAGTGGCGCCACTTATTTGGCACATCCTGCATCACGCGACGTACATTATGTTGCAGAGTATGCTGTAATACCAGATtggaatttttgttttgtaataattGATTCCCCAAGATGCAAAATACGGTTGATCGATGTTCGACAAAATACAACGAAAAGACTGTTTGTC
Scaffold1:650947-651312	Scaffold1	650947	651312	WHL22.364	SPU_007235	AAAGCAAATGTCGAAGGAGCAAAATGGCGTGTTGTTGCTGGTACTCCATGCCCACATCCTTGACTGACTTGTGCATAATTATATTGAATGCATTGTGCGAATCATGTTCCAATCCCAAAACAGAATTGTAATTCAATCACATTTGACATTGGCATCTTACAGGTAAAAAATGATTGGTACACACAATTCGCATGTCTCTACGCATACAACGTTACATTTCCTTGCCCAAGCTGGCTCGATCGTAGCATCGGCAAATCATATTTATGTACCGCTAAAGCAAATATATTCACGGACTTTTATTCACTGGAAATTTAAGGATTTTCTTCGCTGCGCTAACTTAAATATAAATGCAAGAAACGTCAGGA	0	NW_022145545.1:1597128-1597493	NW_022145545.1	1597128	1597493	LOC582454	0	TCCTGACGtttcttgcatttatatttaagttagcgcagcgAAGAAAATCCTTAAATTTCCAGTGAATAAAAGTCCGTGAATATATTTGCTTTAGCGGTACATAAATATGATTTGCCGATGCTACGATCGAGCCAGCTTGGGCAAGGAAATGTAACGTTGTATGCGTAGAGACATGCGAATTGTGTGTACCAATCATTTTTTACCTGTAAGATGCCAATGTCAAATGTGATTGAATTACAATTCTGTTTTGGGATTGGAACATGATTCGCACAATgcattcaatataattatgcacAAGTCAGTCAAGGATGTGGGCATGGAGTACCAGCAACAACACGCCATTTTGCTCCTTCGACATTTGCTTT
Scaffold1:65949-66366	Scaffold1	65949	66366	WHL22.203	SPU_017127	GATAACTGATCTTGAATGCCCGGATGGTGCGGCCAGCCTAGCCGACTGCACGTTTGAAACGATGGAAGTGGAGAAAGCAGAGAACTGTAATATTGACCAAGTAGCTGGAGTTGTATGCTCGAGTAAGTCAGTTTACATGATTATGTTGTATATCAAAAGCCCACCGCATGCTTTGCGACGCCACAAATCCGATTTGCCAAGAAATCGCAATATTAGATCAAATATGGACTTTCAACGTGTCTAGTCGTTTTTTAACCGAGGTCCTTAACTGTGACATGAACCATAAAAAGGTTATTGTTATTATACCAGTAATAGTAGTTCGTCTAGGCGGAGTAAAGGACAGATTGCTTTACATCGGGGGCAACCGCGGAAAAGGTCTCATGTCACGATCCGGAAATG…	0	NW_022145601.1:22302398-22302812	NW_022145601.1	22302398	22302812	LOC578326	0	AtagaaaaaaaacccaaagcATTTCCGAATCGTGACGTCAGACCTGTTCCGCGGTTGCCCCCGATGTAAAGCCAATCTGTCCTTTACTCCGTCTAGACGAACTACTATACCAGTTTACTAAAATAACCTTTTTATTGTTCATACCACAGTTTAGGACCTCAGTATAAAGATTAGACCCGTTGAAACTCCACATTTGATGTAATATTGCGATTTCTTGGCAAATCGGATCCGTGGCGTCGCAAAGCATGCGGTGGGCTTTTGATATACAACATAATCATGTAAACTGACTTACTCGAGCATACGACACCAGCTACTTGGTCAATATCACAGTTCTCTGCTTTCTCCACTTCCATCGTTTCAAACGTGCAGTCGGCTAGGCTGGCCGCACCATCCGGGCAT…
Scaffold1:679658-679675	Scaffold1	679658	679675	WHL22.364	SPU_007235	CTTTCATTACAGAGGGG	0	NW_022145613.1:6191811-6191828	NW_022145613.1	6191811	6191828	LOC115919803	0	CTTTCATTACAGAGGGG
Scaffold1:7356-7749	Scaffold1	7356	7749	WHL22.47	SPU_016802	AGAGACGAAGAGACACACGATGGACGAGAATCCACTCGCGTCAACGGGTGTAGCAAATCCTATTGTAACGGGTGTGCGGCGTGCCCCGAATAGACCTCTTGCTATAGGATACGCTTTGTAGCATGTAAGAGAAATACACATTAACAGATGACTCACTCAGGTGATGGGATGTAGCCAATATGTACGCTCAACGGGTTGAGCGAACCCGTGTTATGGGTCTTTCTATAGGATATGCTTTGTGGGCCAGGCGCCAACATAACAGTGTACGTGTATTACACACTCTCAGGTCACACACATGCACACACCACAGTCGATTCGAGTCGAGGCGATTGCGACAACTGGCGCAAACCATGGACCTATTTTCACGTAAAATCTTTACTCTGAAAATAATTA	3954	NW_022145612.1:21223511-21223777	NW_022145612.1	21223511	21223777	LOC577498	0	agagacaaagagacacaCGATAGACGAGAATCAactcgcgtcaacgggtgtagcaaaTCTAATTGCAACGGGCGCGGCGTTCGCTGAGTAAGGCATCTTACAATAAGATATCCTTTGTAGACCAGGCGCCCATAGTGTACGTGTATTACACGCTCTCaggtcacacacatgcacacagtacagtcgattcgagtcgaggcgattgctacaactggcgcaaaccatggacctattttcacgtaaaatctttactctgaaaataatta
Scaffold1:741118-741302	Scaffold1	741118	741302	WHL22.126	SPU_007233	CCACTTCCATGGGAGGGGGATACAGATAATGGTCAGGAACATGTGAGATTTAAATACTAAGATAAGGATCAAATGTTCTGAAAGTTTTGGTAACCTCTCCTCACCTGGCGTCTCTGTAGAGATGTATTGAACAAGAGTACAACATCAGCAAGGCAGCAGACAAAGACATGCAGTCATCATGCAA	2303	NW_022145545.1:1512813-1512998	NW_022145545.1	1512813	1512998	LOC582838	0	TTGCATGATGACTGCATGTCTTTGTCTGCTGCCTTGCTGATGTTGTACTCTTGTTCAATACATCTCTACAGAGACGCCAGGTGAGGAGACGTTACCCAAAACTTTCAGAACATTTGATCCTTATCTCAGTATTTTAATCTCACATGTTCCTGACCATTATCTGTATCCCCCTCCCATTGAAGTGG
Scaffold1:749041-749362	Scaffold1	749041	749362	WHL22.126	SPU_007233	CACTCCTCCCTCCCTCCCTCCCTCCCTCCCTCCCTTTCATCTCGGAGTTCATCTTCCTGATCTCAAAGAGGAATTTCAAGCAGCCTCACAAGCTCAAAATTCATTAATGTCTACCGGTACTGGTACATCTGTTTTCAAGATAGTTGAATCAACATCTGGGGGGAAATGCCAATAAAGACTGTCCTGTATACACAGTATGGATAAACCCAAAACTTTCCCTGTCTTCTCCAATTTAACNNNNNNNNNNNNNNNNNNNNNNNNNNNNNNNNNNNNNNNNNNNNNNNNNNTGTTACATGTGCGAATGATCCCTTGCATAGCCCT	0	NW_022145545.1:1505205-1505865	NW_022145545.1	1505205	1505865	LOC582838	0	ACTGCTATGCAAGGGATCATTCGCACATGTAACAGTAAACCGCCTTTACAAAATAGGCATAGCAAAAGAAAATTGACCGTAGTATGCTACATTATGACtcaatttcccccccccccctccccaatttaaaaaaatacaaaacaaacagaacaaCGATACTAATAACTGTAGAAAGAATTGACATTAATGAACAATGATTAGCAAAGTCTCTATCCGAAAAGAAttgataataaattaaaaatgagcTAAAAATGTAGTTCTATTTAGCTTTTGAATTCGGTTACTATTACATTGACCTTCTGTTCTGAATACTTTGTATCAcagagaacaacaacaaaagcattGCAAAActaatatttgaaagaaaattggttTGCAAACCAATTTCGTGTTAAATTG…
Scaffold1:752870-753156	Scaffold1	752870	753156	WHL22.126	SPU_007233	GCACACATACAGTGCAATGTACATGTACATGTACATGTACAAAGTACAAGGGTAAATCAAACAAAATATCAGTGAAAAAAATAGACGGGGGCTCAGGGCGAAATAGCCCCCAAAATGCCCAAAAGAGCCAAACTTGTTATAATTCAAGTAGTGATGAAATTTTACAGAACAACATTCCGTACTGTACACTGTACACATGTACTCATACAAGTCTGTACATGTTCATACAGTGTACATGAATACGCTCTTTTCACTTGTGAGCAGGGGAGAACCAAGGGGACATACC	0	NW_022145613.1:6254927-6255213	NW_022145613.1	6254927	6255213	LOC115918347	0	GCACACATACagtgcaatgtacatgtacatgtacatgtacaaagtacaagggtaaatcaaacaaaatatcagtgaaaaaaatagacgggggctcagggcgaaatagcccccaaaatgcccaaaagagccaaACTTGTTATAATTCAAGTAGTGATGAAATTTTACAGAACAACATTCCgtactgtacactgtacacatgTACTCATACAAGTCTGTACAtgttcatacagtgtacatgaataCGCTCTTTTCACTTGTGAGCAGGGGAGAACCAAGGGGACATACC
Scaffold1:753629-753935	Scaffold1	753629	753935	WHL22.126	SPU_007233	GAAAGCTGTATTACACATCAAAGCTGTATACCTTGAACATAATTCAGCCGAATCACTCCCCAAGTTCATATAACTGCAAGTGTGAGAACTGACGTAGTTTGTGCTATGGTGACTGGTGACGACAGATGCAATCATGCATGTCATCCCAATTCACCTAATGACTCTTCATGACTGTATTGGCAGAGACACAAATTCCATGATGCGTGGTGTGTTTTGGACACAGGACCTTTCAAAATGACAATTGGAGCATGCCAACTTGATGACAAATTTGGTCAGCACTTCTCCATCCCTAATTTTCACAGTACA	0	NW_022145613.1:6255686-6255992	NW_022145613.1	6255686	6255992	LOC115918347	0	GAAAGCTGTATTACACATCAAAGCTGTATACCTTGAACATAATTCAGCCGAATCACTCCCCAAGTTCATATAACTGCAAGTGTGAGAACTGACGTAGTTTGTGCTATGGTGACTGGTGACGACAGATGCAATCATGCATGTCATCCCAATTCACCTAATGACTCTTCATGACTGTATTGGCAGAGACACAAATTCCATGATGCGTGGTGTGTTTTGGACACAGGACCTTTCAAAATGACAATTGGAGCATGCCAACTTGATGACAAATTTGGTCAGCACTTCTCCATCCCTAATTttcacagtaca
Scaffold1:756570-756821	Scaffold1	756570	756821	WHL22.126	SPU_007233	ACCTAAATTGATGATAATTCCTGGCCCTAATGCCACTAAAGTAACTGTCTGTGAGCAGTCAGACAAAAGAGTGCCCTACAAAAGATTTGGCCATTGAGGTGAGTCAGCTGTGAAAGAATTCAATGAATTGGACCTTTCACTATCCATCAGTTCCTTTGTGGGAGGGACCATTGAACTGTTGTTACCGCTCTCTGCACAAAAGGGTTGGTTTACAAAAGCAGGTGAGGAAAAACATCTTTGAATTTAGATTC	2058	NW_022145545.1:1497643-1497894	NW_022145545.1	1497643	1497894	LOC582838	0	GAATCTAAATTCAAAGATGTTTTTCCTCACCTGCTTTTGTAAACCAACCCTTTTGTGCAGAGAGCGGTAACAACAGTTCAATGGTCCCTCCCACAAAGGAACTGATGGATAGTGAAAGGTCCAATTCATTGAATTCTTTCACAGCTGACTCACCTCAATGGCCAAATCTTTTGTAGGGCACTCTTTTGTCTGACTGCTCACAGACAGTTACTTTAGTGGCATTAGGGCCAGGAATTATCATCAATTTAGGT
Scaffold1:778785-779147	Scaffold1	778785	779147	WHL22.170	SPU_002656	GCCCAGTAAAAATGGGAAACGTACATAAATGGAATACGAAATGAACAGTATAAAACAGTTAAAATAAATTGAATTGGTATGGTATGGTATTTATTGAATCCTGCATCGAAGTTAAATATACTGAATTGCACAATGATATACATGTACATTGCGTTTTAAAAACAAGTGTACAATTTAAAACAGTATTATTTACATAATCATAAATACACGTGTACATATTTTTTTTAATTTGATTTCATTTCATTTTTGCATTTTGCCAAATATAATATAACTGAATAACAAACAACGTATCGATGTAAGGTATAATACAACATATACAAACAATAACTTCTTTATGTCAAAATCGCAGCACTGATTAGAGG	0	NW_022145545.1:1477493-1477855	NW_022145545.1	1477493	1477855	LOC115918702	946	CCTCTAATCAGTGCTGCGATTTTGACATAAAGaagttattgtttgtatatgttgtattataccttacatcgATACGTtgtttgttattcagttatattatatttggcaaaatgcaaaaatgaaatgaaatcaaattaaaaaaaatatgtacacgtgtatttatgattatgtaaataataCTGTTTTAAATTGTACACTTGTTTTTAAAacgcaatgtacatgtatatcattgtgCAATTCAGTATATTTAACTTCGATGCAGGattcaataaataccataccataccaattcaatttattttaactgTTTTATACTGTTCATTTCGTATTCCATTTATGTACGTTTCCCATTTTTACTGGGC
Scaffold1:786549-786924	Scaffold1	786549	786924	WHL22.170	SPU_002656	ACTAACTTAAATTGATAGTTTAACAGGTTTGGGCCCACTCCACTCCACAGTGCACTCCCAATCGTAACAATCGTCCAATCAACTGATAGATAAAACTTCTACCGTTACGTAATACCTCACCATCAGCCAACCAGAGGGAAGCACAAGGAAGGAAGAGGGAGTGACCTCATACTTACCACCGCCATTGGTCAGGCATTGTTTCCCTTCCTGGTCATCACTAACTCTATTGTTATTACCCACCCCACTTCCTCTCTACCTGCGACCCATCCCCACGCAAAGGAGGTACACCCTTGATCCTAACAATAGACTTGAACTTGCTGCTTCCCCTGTATTGTCCGCTTATTTCCTCCCAAACAATAGTCTACTGTTCTCAAT	6501	NW_022145545.1:1470000-1470092	NW_022145545.1	1470000	1470092	LOC115924967	0	TATCTATCAGTTGATTGGACGATTGTTACGATTGGGAGTGCACTGTGGAGTGGAGTGGGCCCAAACCTGTTAAACTATCAATTTAAGTTAGT
Scaffold1:842206-842504	Scaffold1	842206	842504	WHL22.309	SPU_002659	TGTAAATAAAAGTGGAGGTGTGTTATGTTTGCTGTACCTGTTGGAGTGTTGGTACAAGTTTTCAATTCAATTTTGTAATGTTTGCATTCATGATCGCTCAGAATTATTAACAATGAAATAGACTCGATATTCAATTCCTCGTGTACAATAGTGCCTTTGTGGTTGAGTGTGTTTACACTGTGTCTCCAAATGTATCATTGTGTAGGAGATTCTCAGTACACTTGACGAGACTGTTAATCGGATCAACGCAGAGGGCGACGCTCACAGTTCATTCTGCTTGTTCTTCATGAGTCATGGC	0	NW_022145545.1:1417576-1417874	NW_022145545.1	1417576	1417874	LOC115918722	0	GCCATGACTCATGAAGAACAAGCAGAATGAACTGTGAGCGTCGCCCTCTGCGTTGATCCGATTAACAGTCTCGTCAAGTGTACTGAGAATCTCCTACACAATGATACATTTGGAGACACAGTGTAAACACACTCAACCACAAAGGCACTATTGTACACGAGGAATTGAATATCGAGTCTATTTCATTGTTAATAATTCTGAGCGATCATGAatgcaaacattacaaaattgaattgaaaacttGTACCAACACTCCAACAGGTACAGCAAACATAACACACCTCCACTTTTATTTACA
Scaffold1:872558-872846	Scaffold1	872558	872846	WHL22.616	SPU_002660	GCTGAAGAAAAAGAAAAAGGAGAAGAAGAGGATGTGACAGTGCTGCTGCTACTGATGATGATGATGATGATGATGATAGTGATGACGTTAGTGATGGTAATGTTGTCGAAGGAGAAAGAAGAGGATGAACAGAAGTGTGAACAGAAAAAAAATTAGTTAACGCTTCCAAATATATTCCTATCAGGTATCTAATGCAAATGATGGACCATAAGGACGAGAGTGCGACCCGTCTTCGAGATCATCTCATCCCCTTAGCCGACGACAAAACGCTTGTTAGAATGTTGGACC	0	NW_022145545.1:1385864-1386151	NW_022145545.1	1385864	1386151	LOC115918059	0	GCTCCAACATTCTAACAAGCGTTTTGTCGTCGGCTAGGGGATGAGATGATCTCGAAGACGGGTCGCACTCTCGTCGAAATGGTCCATCATTTGCATTAGATACCTGATAGGAATATATTTGGAAGCGttaactaattttttttctgttcacACTTCTgttcatcctcttctttctccttcgaCAACATTACCATCACTAacgtcatcactatcatcatcatcatcatcatcatcagtagcaGCAGCACTGTCacatcctcttcttctcctttttctttttcttcagc
Scaffold1:875761-876014	Scaffold1	875761	876014	WHL22.616	SPU_002660	CCTTCTTGAGTAGGTCTGTATAGGTAAGATGAGGTCTTCCAGGTTTCTTCTTCCCGTGATAAGAGTAAAAGCTGAGATATTGGTTCGTTGATGTTCCTACAGCTGTGATATGGTGTAATAATGAAGCCCTAAACAAAAATTGCGCTTCAAAATGATCATAAAGTGCCTCAAAAAATAAAAATCTTTGAGTGACCGGTTTTACCATACTTGTTTTCCCCAATAGACTGTGATGTAATAAAAAAAAAACGTTGGG	0	NW_022145545.1:1382532-1382940	NW_022145545.1	1382532	1382940	LOC115918059	0	cccaacgttttttttttattacatcacagtctattggggaaaacaagtatggtaaaaccggtcactcaaagatttttattttttgaggcactttatgatcattttgaagcgcaatttttgtttagggcttcattattacaccatatcacagctGTAGGAACATCAACGAACCAATATCTCAGCTTTTACTCTTATCACGGGAAGAAGAaacctgggccccgttgcacaaaacttaccattgacggtaactttgccatcaatggtaactaccatggaaaccttgattttgattggctgttgagcaatgttaccatggtagttgccattgatggcaaagttaccatcaatggtaagatGCAACGGGCCCTGGAAGACCTCATCTTACCTATACAGACCTAC…
Scaffold1:887504-887897	Scaffold1	887504	887897	WHL22.616	SPU_002660	GGTATCTCTTTGGCTATCCTGCTTCGGGATAGCTATACGAGGAATTTTTGTGTGTGGACACGGGGTCAGTCTAGTGTCGTTAAATCGTAACAACCACTCCCTTGGACCTTGTATTATTTACACAATTTCAAGCTGTCGAAATCACTGGAGCGAAGGAGAGTAACATGTATAGCAAGAATGCCTATTAGTATTATACCATATTCTACCATTCTTGACCAGAAGTACGTTTTAAACTCTATCCCATTGAATGTTGTGTCCAGTACTAAGGGCGTGTTCTGCTGTTTAATTCGAGGGCTTTTTTGTGCTCTTTAAAAAGAGCACATAACAGGGGCAGTGCAATTTAAATATCAGGGGGTGGATTAGAGTTTATTTATAACAAGAAATGAAAGGGTT	0	NW_022145545.1:1370677-1371070	NW_022145545.1	1370677	1371070	LOC115918059	0	AACCCTTTCATTTCTTGTTataaataaactctaatccaccccctgatatttaaattgcactgcccctgTTATGtgctctttttaaagagcacaaaaaAGCCCTCGAATTAAACAGCAGAACACGCCCTTAGtactggacacaacattcaatgggataGAGTTTAAAACgtacttctggtcaagaatggtagaatATGGTATAATACTAATAGGCATTCTTGCTATACATGTTACTCTCCTTCGCTCCAGTGATTTCGACAGCttgaaattgtgtaaataatacaAGGTCCAAGGGAGTGGTTGTTACGATTTAACGACACTAGACTGaccccgtgtccacacacacaaattcCTCGTATAGCTATCCCGAAGCAGGATAGCCAAAGAGATACC
Scaffold1:894468-894621	Scaffold1	894468	894621	WHL22.616	SPU_002660	CCCATGTGCAAACACAACAGTTAATGAACGATTCGAAATATATTCCTATCAGGTATCTAAAGCAAATGATGGACCTTTTCGACGAGAGTGCGACCCGTCTTCGAGATCATCTCATCCCCTTAGCCGACGACAAAACGCTTGTTAGAATGTTGG	0	NW_022145545.1:1364445-1364598	NW_022145545.1	1364445	1364598	LOC115918059	0	CCAACATTCTAACAAGCGTTTTGTCGTCGGCTAAGGGGATGAGATGATCTCGAAGACGGGTCGCACTCTCGTCGAAAAGGTCCATCATTTGCTTTAGATACCTGATAGGAATATATTTCGAATCGTTCATTAACTGTTGTGTTTGcacttctg
Scaffold1:915947-916367	Scaffold1	915947	916367	WHL22.616	SPU_002660	CGAGAAAGACCTACACAAACGCTCGTCACACACAAAAAAACACACACCCACACTTTCGTAATCTTGTAATTGAATTTCACATCAATGATATATGACTTCATTCGATTTGCAAACGTACGGACATGCAATCATGGAAGGAAAATAGATTTGTAAAACCCAGAGGAGAGCAACAGTTGACAAGTCATTTCTACAATGAATTATTAATCTTTAAAATGGTATCCAAATAAATGAGATATACATGTACTCACTTGAAAATCGGATCCACCATGCCTGGTCGCATCTTGCAATCATCGAAAGTGATGTTCCTATTCATTCTCCTGCCGGCTTGTTAGAATCTCGACTATGAACGAGTGAAACGCATGCCGTTTCCGTCATTATTTGTGGCTAAAAATTAATCCT…	11934	NW_022145545.1:1341281-1341701	NW_022145545.1	1341281	1341701	LOC115924677	2288	TGCCATCTATTCAAATATCCAAGGATTAATTTTTAGCCACAAATAATGACGGAAACGGCATGCGTTTCACTCGTTCATAGTCGAGATTCTAACAAGCCGGCAGGAGAATGAATAGGAACATCACTTTCGATGATTGCAAGATGCGACCAGGCATGGTGGATCCGATTTTCAagtgagtacatgtatatctcattTATTTGGATACCATTTTAAAGATTAATAATTCATTGTAGAAATGACTTGTCAACTGTTGCTCTCCTCTGGGTTTTACAAATCTATTTTCCTTCCATGATTGCATGTCCGTACGTTTGCAAATCGAATGAAGTCATATATCATTGATGTGAAATTCAATTACAAGATTACGaaagtgtgggtgtgtgtttttttgtgtgtgacgAG…
Scaffold1:97960-98217	Scaffold1	97960	98217	WHL22.207	SPU_017128	CGACTGTTATACCCAAGAATTTGGTAAGAGGGACATGTTTCAAAGGGGTATTGTCAAAAATAATGTCAGAGGGTAATGAATCCAAAGAGTTACTAAATAGCATGTAGTTTGTTTTCTGGAGATTAAGTGACAATTTATTTGCTTGTATCCATTGCAATATATTCAATAACTCATTGTACAATTGATTTTAGCAAGTGGTTGAAATCAAAAGAAGAAAAAATATGATATGCCTGGTAATACTGGGAATCTTTTGTTTG	5031	NW_022145615.1:9268872-9269129	NW_022145615.1	9268872	9269129	LOC100891208	4691	CGACTGTTATACCCAAGAATTTGGTAAGAGGGACATGTTTCAAAGGGGTattgtcaaaaataatgtcagagGGTAATGAATCCAAAGAGTTACTAAATAGCATGTAGTTTGTTTTCTGGAGATTAAGTGACAATTTATTTGCTTGTATCCATTGCAATATATTCAATAACTCATTGTACAATTGATTTTAGCAAGTGGTTgaaatcaaaagaagaaaaaatatgatatgcCTGGTAATACTGGgaatcttttgtttg
Scaffold10:1120530-1120774	Scaffold10	1120530	1120774	WHL22.1863	SPU_020069	CCACTTCATCCGTCAGCTCTGTATTCCTGGCTTCAGAACTCCTCAATTTGCTACAGAGATAATGTGAAAGCGGGAAAAATAATTATAATTCTATTAGATCACTAATCTCAATGAAGTGTGATAATGGATGATAACTTACCACTACCACTATCATGATTACAGCTACAGTTAAACGCCCATCAGCGCCACATGAAGCCTTGAGTCCTGCAACGATATGTACCCTGGCATGGGCCTCACAGCAAAG	0	NW_022145611.1:16807114-16807374	NW_022145611.1	16807114	16807374	LOC576491	0	CTTCGCTGTGTGGCCCATATCAGGGAACAGATCGTTGCAGGACTCCAGGCTACATGTAGCGCTTAGGGTGTTTAATTGTAGCTATAGtcatggtagtggtagtggcaAGTTATCATCTTGGAAGAGGGAATCGCTGTACAATCACTTCATTGAGATTAGTGATCTAAtagaattataattatttttcccGCTTTCACATTATCTCTGTAGCAAATTGAGGAGTTCTGAAGCCAGGAATACAGAGCTGACGGATGAAGTGG
Scaffold10:1141956-1142165	Scaffold10	1141956	1142165	WHL22.1981	SPU_020069	CCCCACCTCCCCCCAACCCATATGCCACGTACATGTAACCTAAGATTCTGGTCATTAATGTGCTGCCTGAAATTGAAAAAAGACACACTCACATATTCCCTTCCCCTCCCATCTCCCCCCTCCCCCCCCCCCCCCCAAAAAAAAGGGCACATACCCATCCTTAAACCAATGCACATAATCAAAATAATTTTCACACATAACTGTCATCA	0	NW_022145611.1:16790962-16791166	NW_022145611.1	16790962	16791166	LOC576491	0	TGATGACAGTTATGtgtgaaaattattttgattatgtGCATTGGTTTAAGGATGGGTGTGTGCgcgcttctttttttttgggggggggggagatgggagGGGAAGGGAATATGTGAGTGtgtcttttttcaatttcaggcAGCACATTAATGACTAGAATCTTAGGTTACATGTATGTGGCATATGGGttggggggaggtgggg
Scaffold10:1188241-1188329	Scaffold10	1188241	1188329	WHL22.1981	SPU_020069	GGTATCCATTAATGAGATCCGTACACTTCCCTCCATGCATACAAGGATCACTGCTGCATTCATCCACGTTCGTCTCGCATTCGATGCC	11241	NW_022145611.1:16745516-16745604	NW_022145611.1	16745516	16745604	LOC105443877	0	GGCATCGAATGCGAGACGAACGTGGATGAATGCAGCAGTGATCCTTGTATGCATGGAGGGAAGTGTACGGATCTCATTAATGGATACC
Scaffold10:1212472-1212715	Scaffold10	1212472	1212715	WHL22.2488	SPU_020069	CACTGTGCCTCGCCACAGATGGCGCTATTCCATAACATCCTCCTTTGTTTATAAAACAAGAGAATTTTAGATGCATTGACAAGATTAAACATCTTCATTTTAACTGAGTCCATTCCATATTAACTGAGTCTGTTTGCCACTTGTCATTCAGTCCATTTTCTACTTTCATAAATGAATCCATGTGTTGGGTGTCCATGGTGATACCAAACATTGCGACGCTCACTGTTGAATTGATGAACGAAG	935	NW_022145609.1:23008297-23008503	NW_022145609.1	23008297	23008503	LOC105444823	2567	CACTGTGCCTCGCCACAGATGGCGCTATTCCATAACATCCTCCTTTGTTTATAAAACAAGAGAATTTTAGATGCATTGACAAGATTAAACATCTTCATTTTAACTGAGTTCATTCCGTATTAACTGAGTCTGTTCGCCACTTGTCATTCAGTCCTTTTTCTACTTTCATAAATGAATCCATGTGTTGGGTGTCCATGGTaatacca
Scaffold10:1246915-1247254	Scaffold10	1246915	1247254	WHL22.2631	SPU_020068	CGTTTTCCAACGAGAAAAATACTTGGAAGCATTACAATGGCCCAGACGACAATGGCAAGTGCAAAAGATGGATGGATAAGACGGTAGATCAATCGTAGACGGTTGTCAAAACATGAATAAATGTGCATTACAATACGACGTGTCCTTCTAATGTTTCCACTTGCCTGCTTCTCCAGGGCTCTCATCGTAATGATGTTCTATATAGCGTATGTGTGAGGCTGATGGAATACTCTGATACGAGCCTGTGGTTTACCATTTCTTCTTCCTTACAAACTCTCTCCACATCTCTCTTTCTGTCTGTCTGTCTCTTCTCCATAGCTCTCGCTCTCTCATCTTCTG	0	NW_022145611.1:16691687-16691990	NW_022145611.1	16691687	16691990	LOC100889010	0	CAGAAGATGAGAGAGCAAGAGCTatggagagacagacagacagaaagagagatgtgGAGAGAGTTTGTAAGGAAGAAGAAATGGTAAACCACAGGCTCGATCAGAGTATTCCATCAGCCTCACACATACGCTATATAGAACATCATTACGATGAGAGCCCTGGAGAAGCAGGCAAGTGGAAACATTAGAAGGACATGTCGTATTGTAATGcacatttattcatgttttgacaACCGTCTACGATTGATCTACCGTCTTATCCATCCATCTTTTGCACTTGCCATTGTCGTCTGGGCCATTGTA
Scaffold10:1270917-1271254	Scaffold10	1270917	1271254	WHL22.2631	SPU_020068	CCTCTTCAGCCAAACATGTTTGTATTGCTTGTAGATAAGTCCTGAATAATTGTGAACTAAAAAGATGTATATCTTTGAGCTCAATAATGAATCATGGATATTTCCATGATTAATTTTTTTTTCTGAGTCACATTTGTATAGTGCATAATACTGCATTTTTATTAAGCCCTTAACATTGTAATCATTATAACCCTGGTCCTTGGATTCAATTGCTAATTCGCACATGATAGTGTACACATTCTGCTCCCTGGGGAGTATTCTGGCTAGGAACCATTTTACAAGTGCATAAATGCCAATCCAACAACATTAATGTTCCCCATTTCTCATTCTTTCTCTC	0	NW_022145611.1:16668890-16669227	NW_022145611.1	16668890	16669227	LOC100889010	0	gagagaaagaatgagaaatggGGAACATTAATGTTGTTGGATTGGCATTTATGCACTTGTAAAATGGTTCCTAGCcagaatactccccagggagcagAATGTGTACACTATCATGTGCGaattagcaattgaatccaagGACCAGGGttataatgattacaatgtTAAGGGCTTAATAAAAATGCAGTATTATGcactatacaaatgtgactcagaaaaaaaaattaatcatggAAATATCCATGATTCATTATTGAGCTCAAAGATATACATCTTTTTAGTTCACAATTATTCAGGACTTATCTACAAGCAATACAAACATGTTTGGCTGAAGAGG
Scaffold10:1278095-1278195	Scaffold10	1278095	1278195	WHL22.2631	SPU_020068	CCCATACCTTTTCCTGCTTACATTGTTTTCTGTTCGTTTTCTTGTTCTTTCTCTCTCTCTCTCTCTTCTACATTTTCTTTCCCATTTGTTCTCCTTTTTG	0	NW_022145611.1:16658310-16658410	NW_022145611.1	16658310	16658410	LOC100889010	0	caaaaaggagaacaaatgggaaagaaaatgtagaagagagagagagagagaaagaacaagaaaacgAACAGAAAACAATGTAAGCAGGAAAAGGTATGGG
Scaffold10:1300863-1300879	Scaffold10	1300863	1300879	WHL22.2631	SPU_020068	CTGGTATATCCAAATC	0	NW_022145611.1:16634928-16634944	NW_022145611.1	16634928	16634944	LOC100889010	0	GATTTGGATATACCAG
Scaffold10:1328884-1329217	Scaffold10	1328884	1329217	WHL22.2631	SPU_020068	ACCCAAGATTGAATGGAATTAACTTTTTAACAACAATCTTTTGTACAGATCTTATATACAGTATCATCCTTTTATACATGATGACATTGATGATGATGATGATGATGACATCATCATGTTATCATAATCATCTCTAGGAAGCCAATTGAAGCTGGAAACCATTGTTATTTATCCCACTGTTATAAATATACTGTAGTGCATACATGTAGTTTTCAACCTTGTCACCACTACTTCCATTTTCTCCCACATCCTCCCTTTGTATTATACAAGTACATGACATAAAAAAAATTCATGATTTACATGAACATCATCAAACATCTTAAATAATCATTG	0	NW_022145611.1:16606590-16606923	NW_022145611.1	16606590	16606923	LOC100889010	0	CAATGATTATTTAAGATGTTTGATGATGTTCATGtaaatcatgaattttttttatgtcATGTACTTGTATAATACAAAGGGAGGATGTGGGAGAAAATGGAAGTAGTGGTGACAAGGttgaaaactacatgtatgcactACAGTATATTTATAACAGTGGGATAAATAACAATGGTTTCCAGCTTCAATTGGCTTCCTAgagatgattatgataacatgatgatgtcatcatcatcatcatcatcaatgtcatcatGTATAAAAGGATGATACTGTATATAAGATCTGTACAAAAGATTGTTGTTAAAAAGTTAATTCCATTCAATCTTGggt
Scaffold10:1386322-1386671	Scaffold10	1386322	1386671	WHL22.1498	SPU_020062	GCAAACTTTTCACATGCAACGTGAGCACATCAGCTCACAACGGATGAGCTTCAACGTGTAGACCTCTAGAGTTGAGCGCTCGTAGAAAATTGGGGGAAGGAAGTTTGCTTGAGTATTTTTTATTAATCTCATTTCCTTTTTGTGTACGCAGAAGTAGTAGGGCTGTCCTAGACACTCCTAAACCATGGGTTGTATATCAGGGTAAAGTGGGATTGACAGGGCTTGTGAAGATTAGGGGAAATTTGGGGTGTTCTACTTTTCTTTCCCAAGATAGTCTGTGACTAATGTTTTTCAATTCTTTGAAAATGTCGTACGTGTAGTCACATGGTTGTAGAACCCACTTGTTTCC	0	NW_022145611.1:16551542-16551895	NW_022145611.1	16551542	16551895	LOC578423	15013	GGAAACAAGTGGGTTCCACGACCATGTGACTACATGTACGACATTTTCAAAGAATTGAAGAACATTAGTCACAGACTATCTTGGGAAAGAAAAGTAGAACACCCCAAATTTCCCCTAATCTTCACAAGCCCTGTCAATCCCACTTTACCCTGATATACAACCCATGGTTTAGGAGTGTCTAGGACAGCCCTACTACTTCTGCGTACACAAAAAGGAAATGAGATTAATAAAAAATACTCAAGCAAACTTCCTTCCCCCAATTTTCTACGAGCGCTCAACTCTAGAGGTCCACATATACGTTGAAGCCCATCCGCTGTGAGCTGATGTGCTCACGTTGCATGTGAAAAGTTTGC
Scaffold10:1420538-1420834	Scaffold10	1420538	1420834	WHL22.1498	SPU_020062	GTCAGTGGGATATTCTGTTTCAACTGCATTTCTTTTTCCACGTCGAAAGCTGGAAGCGTAAATGTCCTGGTAGGCTGTCAAGTTTAATACACACCTTGCATGATACTCATCCAGGAGTTAAAGGTACCAATGAAGTCTATTTTAATGAAAAATATTGATCTACTTTAAATTGCTATAAAAGTTAATTGTTTCATGATCAGCGATCATTGTATATCTTTTATTTTTTTATCGCATTTTGTAAACATGCTGGTGGCGATAATTCTCTAATCCTGAATGAATAATTTATCTGACGTGTG	0	N/A	N/A	N/A	N/A	N/A	N/A	N/A
Scaffold10:1432675-1432771	Scaffold10	1432675	1432771	WHL22.1498	SPU_020062	CAGCCATAGGCGCGATTTGAAATTCATCAAAATTTACCGGGAGCACCGGTAAATTTTAATATTCAATTTTTCTCGAAAGCAAAAGCGTTTTAGGGG	0	NW_022145612.1:61739794-61739890	NW_022145612.1	61739794	61739890	LOC575102	0	cggccgtaggcgctatttgaaactTATCAAAATATACTGGGAGCACCTGTAAATTTTTAGGTTCAATTTTTCtctaaagcagaagtgttttagggg
Scaffold10:1451007-1451288	Scaffold10	1451007	1451288	WHL22.1498	SPU_020062	CAAGTGACGCACAAATTAAATGTTTGATTGGCTGTCTGTCGTGGAAGATGTAGTCGAGTAGCATGTCTCCTCCAGCACCCGCCAAGAAAGCAGACATCTTGTGTGCAAAGATGTTAAATGGCCATAGATTATCGTGTATAGTAGGACGAGGTCAGCGTTTGTGTGTAGGAGAGGGGTTGCATTGTTGACCCGATTCCACATGCTTATGTTCTAATTCTCGGTATATGTCTCGCCATGCCAGCAACCTTTTTCTCTGTCTTTCTTGCCGTCTCTGTTGATGT	0	NW_022145611.1:16488997-16489278	NW_022145611.1	16488997	16489278	LOC100889329	0	ACATCAACAGAGACGgcaagaaagacagagaaaaaggTTGCTGGCATGGCGAGACATATACCGAGAATTAGAACATAAGCATGTGGAATCGGGTCAACAATGCAACCCCTCTCCTACACACAAACGCTGACCTCGTCTTACTTTACACGATAATCTATGGCCATTTAACATCTTTGCACACAAGATGTCTGCTTTCTTGGCGGGCGCTGGAGGAGACATGCTACTCGACTACATCTTCCACGACAGACAGCCAATCAAACATTTAATTTGTGCGTCACTTG
Scaffold10:1509086-1509342	Scaffold10	1509086	1509342	WHL22.1640	SPU_011667	GACTGTCCTTGGAAAGTTGTTGATTTTTGTACCAAGTCAGTGTGAATCATGGCCATGTAGCAAATCAGGCATGTAAATCTATTGTGTCCACCTGATGAACTGCAGTTCTTAAAACCATCTTTTGAATGGTTTTATGAGATTTGCTCACCCAACCATACAGCCAAATTGACAGCTTTTGAGTGGGAGGGGGGGGGGGGGGGGTGGCGGCGGCTACAAGAGCAATGATATTCTTTTTTTTTATACTTTAAACACATAC	0	NW_022145611.1:16443159-16443409	NW_022145611.1	16443159	16443409	LOC578356	0	GTATGTgtttaaagtaaaaaaagaatatcattgctcttgtagccccccccccccccccccccctctcccactcAAAAGCTGTCAATTTGGCTGCATGGTTTGGTGAGTAAATCTCATAAAACCATTCAAAAGATGGTTTTAAGAACTGCAGTTCATCAGGTGGACACAATAGATTTACATGCCTGATTTGCTACATGGCCATGATTCACACTGACTTGGTACAAAAATCAACAACTTTCCAAGGCCAGTC
Scaffold10:1522907-1523084	Scaffold10	1522907	1523084	WHL22.1640	SPU_011667	TGAAGTCTTATCTGATTGTTACCTATCACCATTGTTTGATGCTAAGAAATCACACAATACCCCTAGCCCTACCCCTAATATGGAAAACAGGAAGTTGCACACAATTTATTTGGAGTTTGGCTTCTCTCTCCAAGCCTTCCTACATTGTATAATAAGCGAGCTGTATGGAAAGGGAGT	0	N/A	N/A	N/A	N/A	N/A	N/A	N/A
Scaffold10:1525569-1526092	Scaffold10	1525569	1526092	WHL22.1640	SPU_011667	CCATGTACACTGTAGACCAAGAAATGTCATCAAATGACTCAAGTTTCCAGTTACAGTATTAGAATGCTCTTGAACCTGTACCTACACCTACATGTACATGTACTACAAACGCACCTGCATACTTGAAGTTTAGGTAGAAATATATGCATGATTTGCTCTTGTCAAAAGTGACTTTGTTTGCATTTAGGACCAGGGCTTGTTATCTTTTTGTGCAGTGGAGTGTGTACCTTGGACTAGTCAATGGATGACGTAATATGCGTAGGCCTACAAAACTGCATTCTTTTATCTAGTATGCAGTTCCGAAATAGAACTATATAACACCATGCCTGTAATGTATATCCATGATTCAGAGTGAATAACTGTTTAACTCCCACTCTTGTGATTCCCGCCTTTCCCGGA…	0	NW_022145611.1:16430044-16430529	NW_022145611.1	16430044	16430529	LOC578356	0	GGTTTATTCTTTCTAGTCTTCAGTCAAACAAGTCAGCATTGTTCGCAAAAACCTGTCTAGATTACACGAGCACAGAGACATCAAACATTATCTGCTTCAGAATTGAATTTTGTTGTGGATTATTTCCGGGAAAGGCGGGAATCAAATGAGTGGGAGTTACACTGTTATTCACACTGAATCATAGATATACATTACATGCATGGTGTTATATGGTTCTATTTCGGAACTGCATACTACATAAAAGAATGCAGTTTTGTAGGCCTACGCATATTACGTCATCCATTGACTAGTCCAAGGTACACACTCCACTGCACAAAAAGATAACAAGGCCTGGTCCTAAATGCAAACAAAGTCACTTTTGACAAGAGcaaatcatgcatatatttcTACCTAAACTTC…
Scaffold10:1613098-1613286	Scaffold10	1613098	1613286	WHL22.2445	SPU_016849	AAGGGTGGGCGGGGTCAGATATACTAGCGCAAATCTTGCATGTTTTTGGATATACGTAACGTACGCCCTTTGCGTACGCCTAAAGATAGCCTGTCAATGCGTGTGTAAAGCATTTGCGGGATAACGGACGAGTCTGAACTTGCGCTACGGTTATCTGTTATTCATTTGGAAAAGTTGGTAACTCGACC	0	N/A	N/A	N/A	N/A	N/A	N/A	N/A
Scaffold10:1646027-1646541	Scaffold10	1646027	1646541	WHL22.2464	SPU_016848	CCCACTTCCAGCTCTTCCAATACGGAAGGGAACATTACTAAGTGCTTGATCATGATCTTCATCCATGTTCAAGCTCCAGGCAAATTTGGAATAATCTGGACCTTGAAGTTTTTTTTACCAAAGTGACAGAAAAATGAACCTGCACCTACGTTTCGCAAGTGCATATGTGGGACTACACAATAATTTGCAAGCCAACGTTTGTTGTTCGTCTAGCGCCCTCTGTGTTCGGTTTAAAATGAGGAGGCGTCGGCGAATTTTCGGATCAAAGCGAGACCGGACAAACCAATAAATTCCGAGTTGAGACTGGAAAATAAGACATCTCAGGTGCCAGGTGAGAAGATCAATAACTTCAAATCACATTGAAGTTTTAAAATTTTCAATTTTGAGCTAATTTAGCGC…	0	NW_022145611.1:16325078-16325592	NW_022145611.1	16325078	16325592	LOC754911	0	actaacAAGAATTAGAAGGCCTAAAATAAATCCTAAACTTTAAATTTAACCACTGCAAATATCAGTATGTGGGACTAAACATCAATATTAACACTTTACTAACACTTGTTTCATAGCGCTAAATTAGctcaaaattgaaaattttaaaaCTTCAATGTGATTTGAAGTTATTGATCTTCTCACCTGGCACCTGAGATGTCTTATTTTCCAGTCTCAACTCGGAATTTATTGGTTTGTCCGGTCTCGCTTTGATCCGAAAATTCGCCGACGCCTCCTCATTTTAAACCGAACACAGAGGGCGCTAGACGAACAACAAACGTTGGCTTGCAAATTattgtgtagtcccacataTGCACTTGCGAAACGTAGGTGCAGGTTCATTTTTCTGtcactttggta…
Scaffold10:1686550-1686662	Scaffold10	1686550	1686662	WHL22.2167	SPU_016847	AGAACAGGATGTGCTCAAATCTTCACTGCTTCCTTTTTTGTAGTTCGGGTTAGCCCTAAAAGGTAGTTGATTGGATTTCTTTGGTTTTAGTACATTATCACTTGAGCCATTG	0	NW_022145611.1:16291918-16292030	NW_022145611.1	16291918	16292030	LOC586368	0	CAATGGCTCAAGTGATAATGTACTAAAACCAAAGAAATCCAATCAACTACCTTTTAGGGCTAACCCGAACTACAAAAAAGGAAGCAGTGAAGATTTGAGCACAtcctgttct
Scaffold10:1699330-1699707	Scaffold10	1699330	1699707	WHL22.2167	SPU_016847	AAAACAAAGAATGTGAAGATTCACTATGGACCTACTAGTACTATTTGCACTCAATCTTATTTATGACGACAGAAAGGAAACGCGTATAATTCGAAGAGGATTGTGGCGTCATAAAGGCTTCTCACTAACTTTGCGCGCTTTATGCTTTGTTTATTAACCTGATATGACGTCATAAAAAAGGACGCGTTACGCCTTGTTTTGTTTTTGTAAATCTTATTGTGACGTCATAAAGGGCTTTTGCATCCTTGGTTTTTGCCACAACAATCAAGGCAATCGGGGGAATTCTATTCGAGGTACAGGATTTCGACCCCCTGGGCTTGGGGTAAGTTTCTATCTTGGCGAATTAAAAAGACAGAAGAAAAAAAAATGTCCTCCGG	3675	NW_022145611.1:16279215-16279592	NW_022145611.1	16279215	16279592	LOC586394	578	CcggaggacatttttttttcttctgtctttTTAATTCGCCAAGATAGAAACTTACCCCAAGCCCAGGGGGTCGAAATCCTGTACCTCGAATAGAATTCCCCCGATTGCCTTGATTGTTGTGGCAAAAACCAAGGATGCAAAAGCcctttatgacgtcacaataagatttacaaaaacaaaacaaggcgTAACGCGTCCTTTTTTATGACGTCATATCAGGTTAATAAACAAAGCATAAAGCGCGCAAAGTTAGTGAGAAGCCTTTATGACGCCACAATCCTCTTCGAATTATACGCGTTTCCTTTCTGTCGTCATAAATAAGATTGAGTGCAAATAGTACTAGTAGGTCCATAGTGAATCTtcacattctttgtttt
Scaffold10:1705274-1705295	Scaffold10	1705274	1705295	WHL22.2167	SPU_016847	CTATGTAACGGACTTTCAATC	9619	N/A	N/A	N/A	N/A	N/A	N/A	N/A
Scaffold10:1727874-1728171	Scaffold10	1727874	1728171	WHL22.2181	SPU_020974	GAAAATAACAGGAATCTATTACGTACTGTACTACTCCGAGCTGTCGGAGCTGTGGCCTTCTCCAGTGTGTTGAATTCAACACCTTGTCTTTGTGACTTGCTGATGAGCTATGCACATGGGGTCTGACTCTACATTATGCATGCATCAATGACTGATGCAAATGAGATTTTAGAACTGGAGATTTGTAATGTATTTGCATTTTAAATTTACACAACTGGTGCTCTATTCAGGCTGGCTCTATTTACATGAATGACTTGTTACAGAATATATTCTATTTATGAGGTAATTTTCTACGGG	0	NW_022145611.1:16262134-16262418	NW_022145611.1	16262134	16262418	LOC100890399	0	CCCCTAGAAAATAACCTCATAAATAGAATATATTCTGTAACAAGTCTTTCATGTAAATAGAGCACCAGTTGTGTAAATTTAAAATGCAAATACATTACAAATCTCCAGTTCTAAAATCTCATTTTCATCAGTCATTGGTGCATGCATAATGTAGAGTCAGACCCCATGTGCATAGCTCATCAGCAAGTCACAAAGACAAGGTGTTGAACTCAACACACTGGAGAAGGCCACAGCTCCGACATGACACCGAGTAGTACAGTACGTAATAGATTCCTGGTATTTTC
Scaffold10:1732694-1733136	Scaffold10	1732694	1733136	WHL22.2181	SPU_020974	ACTTCCCTGGTTCGATTCATTGTATTGCATGGAGAGAAAAAACTGTCTGTAACACTTATCACATCTGAATGACCTATGGGTAGGAAAATGCATGAAGAACTATGCAGACTACTTGAACATTGTACCAATGGAGCTTATATGGAAGGCACCTCTCCTGTGGTGTATTTTAAGTGAATCAGATCTTCTTTCTTCCCCACTCATCTCTTACTTGTTGTACATCTACCACTTAGTAAAAGAGAAAGGCTTCATTAAGCCGAAGATAAAGAACTCACTCTTGGGGTGGTTAGGTTAAGCTTCTTTGTAACAAGATCTCAACTTCTATTCCTATAGTTATCTTTAAACGAATATAATAGTACCTGACCACAATTAAAAGACTTAACGAAGAATAGTCAACCCTGC…	0	NW_022145611.1:16258726-16259168	NW_022145611.1	16258726	16259168	LOC100890399	0	TGGCCGATATTGATCAAGCAATCGATGAGAAACCCCGCTCAGGGCAGGGTTGACTATTCTTCGTTAAGTCTTTTAATTGTGGTCAGGTACTATTATATTCGTTTAAAGATAACTATAGGAATAGAAGTTGAGATCTTGTTACAAAGAAGCTTAACCTAACCACCCCAAGAGTGAGTTCTTTATCTTCGGCTTAATGAAGCCTTTCTCTTTTACTAAGTGGTAGATGTACAACAAGTAAGAGATGAGTGGGGAAGAAAGAAGATCTGATTCACTTAAAATACACCACAGGAGAGGTGCCTTCCATATAAGCTCCATTGGTACAATGTTCAAGTAGTCTGCATAGTTCTTCATGCATTTTCCTACCCATAGGTCATTCAGATGTGATAAGTGTTACAGACA…
Scaffold10:1739781-1740078	Scaffold10	1739781	1740078	WHL22.2181	SPU_020974	GAAATGCAGGCTCAGATCTGTTTACACGTCATAGATCATTATACTTTAACCAGGGTAATGCTCTTCCCTTTGTTTGTGATGACTGCCCAACCTATTGAATTTGGAATTGTTAATATTTGAAGGAGATGACCGTGCGAAATTGTACTTCAATGTGGACTTGGAGTGACCAACTTCTTTTTTAAGAAATGAAATGTAGGGGAAACGTCATGCAATTTGTTTAGATTTTTGGCCCATATATGATTAAATACAATTATGAACATGTATGTGAGGGGTTGGAAGATTTATGATTCTGGGACA	0	NW_022145611.1:16251280-16251566	NW_022145611.1	16251280	16251566	LOC100890399	0	TGTCCCAgaatcataaatacatgtacacaaaggCTTTTGTATTTAATCATATATGGGCCAAAAATCGAAACAAATTGCATGACGTTTCCCctacatttcatttcttaaaaAAGAAGTTGGTCACTCCAAGTCCACATTGAAGTACCATTTCGCACGGTCATCTCCTTCAAATATTAACAAGTCCAAATTCAATAGGCTGGGCAGTCATCACAAACAAAGGGAAGAGCATTACCCTGGATAAAGTATAATGATCTATGACGTGTAAACAGATCTGAGCCTGCATTTC
Scaffold10:1767047-1767432	Scaffold10	1767047	1767432	WHL22.2214	N/A	TGATCGGCTCTTTGCCTTTCCCTTAGCCTTAGCGCCCTTACCACGTCCAGACATGATGATTGTTTAGTGGGGTTATCGATTCGAGAGAGAAAAGAGAACTGTGAAACTTTCAGCGTTCGTCAACAAATTTATACGTATCGCGAGGATCCACTCCCTGCGCTGTGCGAAGTTCGGTTAGCCAATGAAGGCGCGGGGTGTTGTTTGCTGTCCAATGGGAGCGAACCGCTCCGTGGCTCGACGGCACTCTGTAATTTGTGCATATACTTTGCATATACTTTGCATATACCGCCAAATTTTCAATCTGCGCGGCTACTACAGATTCATTCACAAAAATGTGAGCAGCACGCTTTGTCATGGTTATGCCGTAAACGATGGTATACCTATA	11482	NW_022145611.1:16271441-16271826	NW_022145611.1	16271441	16271826	LOC373352	0	TGATCGGCTCTTTGCCTTTCCCTTAGCCTTAGCGCCCTTACCACGTCCAGACATGATGATTGTTTAGTGGGGTTATCGATtcgagagagaaaagagaactGTGAAACTTTCAGCGTTCGTCAACAAATTTATACGTATCGCGAGGATCCACTCCCTGCGCTGTGCGAAGTTCGGTTAGCCAATGAAGGCGCGGGGTGTTGTTTGCTGTCCAATGGGAGCGAACCGCTCCGTGGCTCGACGGCACTCTGTAATTTGTGCATATACTTTGCATATACTTTGCATATACCGCCAAATTTTCAATCTGCGCGGCTACTACAGATTCATTCACAAAAATGTGAGCAGCACGCTTTGTCATGGTTATGCCGTAAACGATGGTATACCTATA
Scaffold10:1782760-1783397	Scaffold10	1782760	1783397	WHL22.2214	N/A	TCGAGCCGTTTTATTCACTTGTTATGAATGCAAGATGAAGTTGCTCTGTCAGGAAAGATTATGTGTGTCCACAAGTCCTCTCTATGAATAGAATCTGCTTTGCATACATTAGTTGTTGCTATGTCATTAGTGGTCAAGGGAAATTTTGTTGAAAAGGTATGCATGAAATGAGTATAGAGGTCAATACATGAAATCCCTACTGGTAAGTGAACAGATTTTGTACTCCAAAAACAATACCTGGCACTCAACTTTCCATTGTCCATGATAGACGATGAGACATACCTGCAACAGAGGATGAATACAGGTGCATGACACAGTGCCCTGCATTCTTTACCCACATACTTTCTCTTTTTAATTTGCATAACATCACAGTCAGTGATTGAACCTGTAAACATTCCA…	0	NW_022145611.1:16204293-16204930	NW_022145611.1	16204293	16204930	LOC757224	0	GATCATTATAAAAAACTAAATTGTAGAATCTTTGGAGGGAAAAAGAAAACTTAGGCTTTcccataaaacaaaagaaaacaaaatcaatgataccaacaatcatattttttattaaaaaaggaatCACATAACTAAAACTTTTATTCTAGAATAGAATGGGTTGTATATGTGAAGGGTGTCATAATTTGAAGGAGTGAAACAGGATAATGTAAAGTGGAGCTTGCTTCCTATTGCAAAATGGAATGTTTACAGGTTCAATCACTGACTGTGATGttatgcaaattaaaaagagaaagtaTGTGGGTAAAGAATGCAGGGCACTGTGTCATGCACCTGTATTCATCCTCTGTTGCAGGTATGTCTCATCGTCTATCATGGACAATGGAAAGTTGAGTGCCA…
Scaffold10:1874045-1874204	Scaffold10	1874045	1874204	WHL22.2236	SPU_011202	CAGGAGCTCCATTATGACCCCGAGGAGCCGCAAGAAATCACACTTGTCCTTTTCCTCTATGCCCTACACCTCCAATCCCTGCTTGTTTGACACCCAATTCAGGAAATGTTGAGTTAGAACGAGTGCAGGATTACACCAACAGGCACTGAGAAACACAAC	0	NW_022145611.1:16111475-16111635	NW_022145611.1	16111475	16111635	LOC757216	0	GTTGTGTTTCTCAGTGCCTGTTGGTGTAATCCTGCACTCGTTCTAACTCAACATTTCCTGAATTGGGTGTCAAACAAGCAGGGATTGGAGGTGTAGGGCATAGAGGAAAAGGACAAGTGTGATTTCTTGCGGCTCCTCGGGGGTCATAATGGAGCTCCTG
Scaffold10:1889437-1889774	Scaffold10	1889437	1889774	WHL22.2236	SPU_011202	CCTTCCGCAGATCTCTTCACATTAAGCAACATTTGGGCAAGTTTTGTATCAATCAATTCAACCTTTGGATTGGTCGGATGAATGAAAGACGGAAGAGAGGAGAGAAGAAATGGGGAGTGAAGAAAAGACGCTGAGAATAGCCCTGAATTCCCGGTGGACTGATGTTGCAGGTTATTCTCCCTTTAAGTCCCCTTGTCCCCTCCTGTCATTGTTACCTCTTCAATGAATTTGTTCTGATCTGGTCTGAAAAGAGGGAGGGCATACAACCATACCAACACAATGCCTCATGATGCGACATTGTTCATGGAATGCTAACTCTCTAGGTGGTAGTTGGTCT	0	NW_022145611.1:16095908-16096245	NW_022145611.1	16095908	16096245	LOC757216	0	AGACCAACTACCACCTAGAGAGTTAGCATTCCATGAACAATGTCGCATCATGAGGCATTGTGTTGGTATGGTTGTATGCCCTCCCTCTTTTCAGACCAGATCAGAACAAATTCATTGAAGAGGTAACAATGACAGGAGGGGACAAGGGGACTTAAAGGGAGAATAACCTGCAACATCAGTCCACCGGGAATTCAGGGCTATTCTCAGCGTCTTTTCTTCACTCCCCatttcttctctcctctcttccgtCTTTCATTCATCCGACCAATCCAAAGGttgaattgattgatacaaaacTTGCCCAAATGTTGCTTAATGTGAAGAGATCTGCGGAAGG
Scaffold10:1959526-1959676	Scaffold10	1959526	1959676	WHL22.2260	SPU_011201	TCCTCTTCTGTAAAGGGAACGTAAATAAACAAATACAAAAACCTGCTCAGTAAAGCTACAACTGAAAGACTTAGGTTCTCATAATGCTCTCCACACACAGTGAACTGAAATCAAGAGATATATCTCCTTAAATGAGCAGAATAGAAATTG	0	NW_022145611.1:16033270-16033420	NW_022145611.1	16033270	16033420	LOC575127	0	CAATTTCTATTCTGCTCATTTAAGGAGATATATCTCTTGATTTCAGTTCACTGTGTGTGGAGAGCATTATGAGAACCTAAGTCTTTCAGTTGTAGCTTTACTGAGCaggtttttgtatttgtttatttacgtTCCCTTTACAGAAGAGGA
Scaffold10:1973164-1973462	Scaffold10	1973164	1973462	WHL22.2260	SPU_011201	ATTTTAAAATGGTCTAGTCTATATAATTATAATTGCTATTTGTTTCACAGGGCCAGGGTTGAAAGTCCAGCCTGGAAATAAGCCTAGCGAAGCTCATTCATCAGAATTTTTTTCGTCAGCGATTAAAAGATTTATGAAATATTTGTTTGAGAAAATTTATTTGATTTGAATTAAAGTTCAATACTTCATTTATATATATTTTAATATTATCAAATAATTTTGTATATAAAATATGATGATTTAATGACACAATCACTTGAATTCAACGATTGGATGGCAAATTGGCAACAGTAAATTA	8135	NW_022145611.1:16024879-16024945	NW_022145611.1	16024879	16024945	LOC575127	0	ACTTTCAACCCTGGCCCTGTGAAACAAAtagcaattataattatatagactagaccattttaaaat
Scaffold10:2004813-2005188	Scaffold10	2004813	2005188	WHL22.2600	SPU_011196	TTTGTGATTTTCCATGCATTTTTACACCAGTGTGAATTCAACAAAGTTTACTTCCAGCCTATTGCTCCAGTGTTTTAGAAGAACTAGAAGTCACTTTGACAGTGATTTCTAAAAATTGTAGGAAAAATTTGTTAGCACGGCTTGGGTCAGTCAAAGTAAATTCATGTACAGTCAAACCTGCTTTATTGATCACCTGTCTACAAAGACCACATTTTTTGTTTCCCTTCTAAATTCTTATTGAAACATGTACTAAAGGAACCTGTACATAAAGACCACCTGCTTCTAAAGACCACTTTTCTTGTCTCCCTTAGATAGTCTTTATAGACAGGTTTCACTGTTCAATGAGGAGATACCGGTATGTAGTTTTTACAAGAG	0	N/A	N/A	N/A	N/A	N/A	N/A	N/A
Scaffold10:2034960-2035229	Scaffold10	2034960	2035229	WHL22.2609	SPU_011197	GAATCACAAAGTTAAATTTGTCAATGATGTAGATATAATTTCCACGTACAGCCTTTTACAACCATTCCATGATTCATATAGGGGAGAGAGAACACAATGGATATGAATGCAATAAATTCCCGTCCCTAAAAAATCATTGACTGATCAATACAAATATTATAAAAGAATAGATTGACTGCATGAAGAAACATACTGAAGGCGTTCAGACTGGACGTGCTCTTTGGAAATTATACGTCATAGTATTATATACCCACGCATGCATGTATGAC	4285	NW_022145611.1:15960859-15961128	NW_022145611.1	15960859	15961128	LOC574850	4233	GTCATACATGCATGCGTGGGTATATAATACTATGACGTATAATTTCCAAAGAGCACGTCCAGTCTGAACGCCTTCAGTATGTTTCTTCATGCAGTCAATCTattcttttataatatttgtattgatcaGTCAATGATTTTTTAGGGACGGGAATTTATTGCATTCATATCCATTGTGTTCTCTCTCCCCTATATGAATCATGGAATGGTTGTAAAAGGCTGTACGTGGAAATTATATCTACATCATTGACAAATTTAACTTTGTGATTC
Scaffold10:2052750-2052935	Scaffold10	2052750	2052935	WHL22.2612	SPU_011198	GTTAATATTCATCCTTAACCAGAAAATGAACAAACTCTAGGCTTGATGATGATGATGAATCAGAGGATCTGCTTGATGCGTATACTCCCGGCCCTAAGGCCAGACAGAAGAAGAGAGTCATGACGACACCAGACAACGTCACCAACAAGAGGACGCCTCTGAGAGAACACAATATCAAGAAAGAA	0	NW_022145611.1:15942990-15943175	NW_022145611.1	15942990	15943175	LOC574732	0	TTCTTTCTTGATATTGTGTTCTCTCAGGGGCGTCCTCTTGCTGCTGACGTTGTCTGGTGTCGTCATGACTCTCTTCTTCTGTCTGGCCTTAGGGCCGGGAGTATACGCATCAAGCAAATCCTctgattcatcatcatcatcaagccTAGAGTTGGTTCATTTTCTGGTTAAGGATGAATATtaac
Scaffold10:2103431-2103607	Scaffold10	2103431	2103607	WHL22.2817	N/A	TAAAATAATTCAGGCCTAAAAGTTCGGGCACAACATTAGCAGCGAGCAATACGTTATGTTTTGTTTTGCGGGGGTAAGATTCCCAACAGGATAAAGCCACTATAAGACATAATTAAGCACTTCCACCGATGATTAGGGGAAGTGTTGCACAAAGAAGAGTCATGTATTAGACTTGT	995	NW_022145611.1:1894205-1894381	NW_022145611.1	1894205	1894381	LOC100891053	981	TAAAATAATTCAGGCCTAAAAGTTCGGGCACAACATTAGCAGCGAGCAATacgttatgttttgttttgcgGGGGTAAGATTCCCAACAGGATAAAGCCACTATAAGACATAATTAAGCACTTCCACCGATGTTTAGGGGAAGTGTTGCACAAAGAAGAGTCATGTATTAGACttgt
Scaffold10:336336-336713	Scaffold10	336336	336713	WHL22.2847	SPU_000794	CATTTTGAAGAATGATTGTGCAATATGTAACATCAAAATTGGCTGAAGTTGGTGCCGTGGAAAAATAAACTAAACTGAACTGAACTGAACTGAGCATATGCATGACCCTGCATTTATATTTCATGTACAATTACATGTGAACTGTTATTTGGACATGTAGTGATTGTTCAATTGTTATCTTTACTTTGCTATTTCTAGGAACTGAAAGCATCCAGCTCTTTGCTTCAAACGACCTGCGTAACATCCTCCTCGTCAAAGGCCACAGGTCCATCTATCTCTGGGAAATTGACCAACCAGAATCGGCCTTGCGATCAAGGGAGTTGGAGCTTAAAGGAACGTGGTCTCTGATCGGTGGAGATAAGGCACCACTCCCAGGG	0	NW_022145609.1:15536158-15536535	NW_022145609.1	15536158	15536535	LOC105444595	0	CATTTTGAAGAATGATTGTGCAATATGTAACATCAAAATTGGCTGAAGTTGGTGCCGTGGAAAAATAaactaaactgaactgaactgaactgagcATATGCATGACCCTgcatttatatttcatgtacAATTACATGTGAACTGTTATTTGGACATGTAGTGATTGTTCAATTGTTATCTTTACTTTGCTATTTCTAGGAACTGAAAGCATCCAGCTCTTTGCTTCAAACGACCTGCGTAACATCCTCCTCGTCAAAGGCCACAGGTCCATCTATCTCTGGGAAATTGACCAACCAGAATCGGCCTTGCGATCAAGGGAGTTGGAGCTTAAAGGAACGTGGTCTCTGATCGGTGGAGATAAGGCACCACTCCCAGGG
Scaffold10:346786-347040	Scaffold10	346786	347040	WHL22.2847	SPU_000794	AGCAGAGCCAGGGTAATATTGGAGTGCCTTGCAGAATGACAAGTGCCTGTGTTCCCCTTTCCTATCAAATGAATACAATTACATGTACATGTATATTAACTAACTTAAGAGTTGGGACTGTTTGAACTGTTTTATCCTATTAAGAGATATTGTCATTTAGTTGGATAGTATACAGTGTTCTGTTACCTTGTGGAATTATGTTCGATTTAGAGGAAGGGAAAAACATGTATGAGTCATTTTGGGTTACAGCGGGG	0	NW_022145609.1:15546594-15546848	NW_022145609.1	15546594	15546848	LOC105444595	2906	AGCAGAGCCAGGGTAATATTGGAGTGCCTTGCAGAATGACAAGTGCCTGTGTTCCCCTTTCCTATCAAATgaatacaattacatgtacatgtatattaactaACTTAAGAGTTGGGACTGTTTGAACTGTTTTATCCTATTAAGAGATATTGTCATTTAGTTGGATAGTATACAGTGTTCTGTTACCTTGTGGAATTATGTTCGATTTAGAGGAAGGGAAAAACATGTATGAGTCATTTTGGGTTACAGCGGGG
Scaffold10:380057-380236	Scaffold10	380057	380236	WHL22.2847	SPU_000794	CTCAAAGGGGATCATGCACAAACATTAACAAATTTTTAATGATTTGTAACAAAAAATGATTATGTTTCTGTTTTAAATGATTAATTGTCACTATTGGTTTAAATTAAATAGTTTGATAGAGCATCTCCCATCCATGACTTTGGACAATCTTAAAATTTACATGTAGTTTTCAGAAAGAA	0	NW_022145609.1:15577322-15577500	NW_022145609.1	15577322	15577500	LOC100894098	24369	CTCAAAGGGGATCGTGcacaaacattaacaaatttgtaatgaattgtaacaaaaatgattatgtttCTGTTTTAAATGATTAATTGTCACTATTGGTTTAAATTAAATAGTTTAATAGAGCATCTCCCATCCATGACTTTGGACAATCTTAAAATTTACAAGTATTTTCCAGAAAGAA
Scaffold10:466338-466781	Scaffold10	466338	466781	WHL22.2869	SPU_000795	TCCTCTCATAAAGCACGATCGCAGAAAAGATAAGACTCATAAGATCAACCTTGTGAAATTTTAGCGCCTTGTGCGTCATCTATTAATTTGCGGACAAGACATATTACGTATTCGGAATATGATTTCTAAGGGCTATACAAAAGGGTATTACCCTTCATGGTTTATTGAGTCTTTGCGATCATTTTTTATTCTTGCTCTCTCTCCTCCCCCACTATTCTCTCTCTCTCTCTCTCTCTCTTTCTCTCTCTCTCTCTCTCTCTCTCTCTTACCTCCCCTACCATCCCCCCTCTCTCTCTCTCTCTCTCTCTCTTTCTCTCCTTTCTGGATCACCTTCTTCTCTTTCATTATGATCAGCTTCCTATATTTGTCCTTTTCCGTCTTTCGATTCTCCCCTTTCTT…	342	NW_022145609.1:15668069-15668534	NW_022145609.1	15668069	15668534	LOC100887991	3017	TCCTCTCATAAAGCACGATCGCAGAAAAGATAAGACTCATAAGATCAACCTTGCGAAATTTTAGCGCCTTGTGCGTCATCTATTAATTTGCGGACAAGACATATTACGTATTCGGAATATGATTTCTAAGGGCTATACAAAAGGGTATTACCCTTCATGGTTTATTGAGTCTTTGCgatcattttttattcttgctctctctcctcccccactattctctctctctctctctctctctctctctctctctctctctctctctctcactctctctctctctctctcacttccccatcattcccccctctctctctctctctctctctctctctttctctcctttctggatcaccttcttctctttcattatgatCAGCTTCCTATATTTGTCCTTTTCCG…
Scaffold10:550855-551002	Scaffold10	550855	551002	WHL22.1157	SPU_000792	CACTTTTTTCTGAGCTCATTATAATATAACTGCATGTCTATAAAATTGGAAAAGGAATAAACGTGCCGCGGATATACTCATTTTACACCCGGGCACTAACATCAAGTGGCACGACAATACGCTTCATTCGCCTCTCTCGACAAAGGC	21833	NW_022145609.1:15754575-15754722	NW_022145609.1	15754575	15754722	LOC575641	0	caCTTTTTTCTGAGCTCATTATAATATAACTGCATGTCTATAAAATTGGAAAAGGAATAAACGTGCCGCGGATATACTCATTTTACACCCGGGCACTAACATCAAGTGGCACGACAATACGCTTCATTCGCCTCTCTCGACAAAGGC
Scaffold10:56721-57039	Scaffold10	56721	57039	WHL22.1424	SPU_005112	AACACATTTGACTGTATACTAAGCAATCTAAATTAAATACACCTTAGTCTGAACAGGCTACGAGTCAGTCGGTGAGAGGGAAACCCCTTTGATGAATCCAATAGCTGTTGTCACTTGTCATAGGGTACCAGGAAATGAGGATTCCTTGGAGACTCGTTAATGAATCTCGTGTCTGTCTTAGTAATGAGACGTTCGTAAAGGAAATACCAATGAACTTAGTATGAGCGTCATTTACCACTATTAATTGCATGAGGCAAATAAACACATCAAACTTTAGCAAAATAACTATATACACAGCATTCACATGTTTGAAGTGTG	0	NW_022145558.1:783708-784026	NW_022145558.1	783708	784026	LOC580387	0	AACACATTTGACTGTATACTAAGCAATCTAAATTAAATACACCTTAGTCTGAACAGGCTACGAGTCAGTCGGTGAGAGGGAAACCCCTTTGATGAATCCAATAGCTGTTGTCACTTGTCATAGGGTACCAGGAAATGAGGATTCCTTGGAGACTCGTTAATGAATCTCGTGTCTGTCTTAGTAATGAGACGTTCGTAAAGGAAATACCAATGAACTTAGTATGAGCGTCATTTACCACTATTAATTGCATGAGGCAAATAAACACATCAAACTTTAGCAAAATAACTATATACACAGCATTCACATGTTTGAAGTGTG
Scaffold10:587054-587444	Scaffold10	587054	587444	WHL22.1161	SPU_000792	TGTCGATGGTTGAGCAACACTGGGCATCCACAACATCGACGACGTTTTCTAATGCTGTATTGGATTTAATAACAAAAAGAACAAATACAGAAAATATTAATTTAGGTGTTTTTAGGTGCTGACAAATTCTGGACCAATCCTGATCCTGGGCATCGTTTGACGAAACCTTCGTGACGTATTAAAGTGCATCTTACATCTTACATTCCCATCGGAACGTGTGATAATAAAGCATACCCGTTTCACTGGGATGTCTGCAAACTTGCACTTACGAGTTACGACGCGGTTTAGTGAAACGATGCCCTGTGACTAACCAGTAGCGATCTGTGCCTTGATTTAAAAATGATCATTGTAAGATCTAACGACAAGGGTACTTATTCCATAATTGATTGA	0	NW_022145609.1:15790676-15791066	NW_022145609.1	15790676	15791066	LOC100891662	0	TGTCGATGGTTGAGCAACACTGGGCATCCACAACATCGACGACGTTTTCTAATGCTGTATTGgatttaataacaaaaagaacaaatacagaaaatattaatttaggtGTTTTTAGGTGCTGACAAATTCTGGACCAATCCTGATCCTGGGCATCGTTTGACGAAACCTTCGTGACGTATTAAAGTGCATCTTACATCTTACATTCCCATCGGAACGTGTGATAATAAAGCATACCCGTTTAACTGGGATGTCTGCAAACTTGCACTTACGAGTTACGACGCGGTTTAGTGAAACGATGCCCTGTGACTAACCAGTAGCGATCTGTGCCTTGATTTAAAAATGATCATTGTAAGATCTAACGACAAGGGTACTTATTccataattgattga
Scaffold10:588713-588971	Scaffold10	588713	588971	WHL22.1161	SPU_000792	GATATTATTCACGTTGTTTGCGGTGTCACCTATTCGGTTCAACAAGTTTGAAAGAAAAAGGAACGCCATGTCTACAGTGGTTGGTGATCACGCTTCTCTTTACGAAATTACGAAGTTATGATGTTAACGCCCACTTCTTTATTCGACCATGACAATGAAAACGGGTCGCCATACAAAAGATACCACTCGGAGAACAAGTAACTTGTGCAGGATCATGATAAATGGGACAAAAAGTGAATAAGTTCACGGGTTACACTA	0	NW_022145609.1:15792335-15792594	NW_022145609.1	15792335	15792594	LOC100891662	0	gatattattcacGTTGTTTGCGGTGTCACCTATTCGGTTCAacaagtttgaaagaaaaaggaacgCCATGTCTACAGTGGTTGGTGATCACGCTTCTCTTTACGAAATTACGAAGTTATGATGTTAACGCCCACTTCTTTATTCGACCATGACAGTGAAAACAGGTCGCCATACAAAAGATACCACTCGGAGAACAAGTAACTTGTGCAGGATCATTGATAAATGGGACAAAAAGTGCATAAGTTCACGGGTGACACTA
Scaffold10:620234-620433	Scaffold10	620234	620433	WHL22.1286	SPU_000799	TGTCATCACAAGAGTGGATACTGCCTTGCTTTTCTCCGCGTGTTGATAAAGGCAATGCAATAGGTCAACTAAGCAGTGCGTCGTTGATAATCCCTTTATATTACCAAATTGTTTATTGTCGAGCTGCGACCCGATGTACTGCATCAGCCACTTCGACACAAAACCCTCAAATACCTTCGCAAAACTATCGGTCAAGGAG	1918	NW_022145607.1:42123043-42123242	NW_022145607.1	42123043	42123242	LOC115927978	0	TGTCATCACAAGCGTGGATACTGCCTTGCTTTTCTCCGCGTGTTGATAAAGGCAGTGCAATAGGTCAACTAGGCATTGCGTCGTTGATAATCCTTTTATATTACCAAATTGTTTATTGTCGAGCTGCGACCCGATGTGCTGCATTAGCCACTTTGACACAAAACCCTCAAATACCTTCGCAAAACTATCAGTCAAGGAG
Scaffold10:64234-64624	Scaffold10	64234	64624	WHL22.1424	SPU_005112	TAGCCCAACACTGTTAGCTCTACAGATCATGATCCTTGCGATCACAATACATGAACAATAGTTCACAATGGGTAATATTAACAGCAATCACAGCTCTCTATTATCCTCTCCCAGACAGNNNNNNNNNNNNNNNNNNNNNNNNNNNNNNNNNNNNNNNNNNNNNNNNNNNNNNNNNNNNNNNNNNNNNNNNNNNNNNNNNNNNNNNNNNNNNNNNNNNNNNNNNNNNNNNNNNNNNNNNNNNNNNNNNNNNNNNNNNNNNNNNNNNNNNNNNNNNNNNNNNNNNNNNNNNNNNNNNNNNNNNNNNNNNNNNNNNNNNCTCTCTCTCTCTCTCTTTCTCTCTACTCCCCCCCCCCCCCCTTCTTCAAAGGGGACTGGAGAAGATGGAGTGTG	0	NW_022145602.1:15473638-15473904	NW_022145602.1	15473638	15473904	LOC591869	0	TAGCCCAACACTGTTAGCTCTACAGATCATGATCCTTGCGATCACAATACATGAACAATAGTTCACAATGGGTAATATTAACAGCAATCACAGCTCTCTATTATCCTCTCCCAGACAGGTCGCACACAAGACCTAATCAAGTGTGACAGCACACTAGGTACCGTATATCATATACTGTCTctctatcccccctctctctctctctctctttctctctactcccccccccccccttcttcaaAGGGGACTGGAGAAGATGGAGTGTG
Scaffold10:678871-679406	Scaffold10	678871	679406	WHL22.12194	SPU_020053	GCGACCGGGTCGTATCAATATCATATTTTATAGATCATCAAGCCTGTTTGGATGGAATTTTGAGGGTGACAAGATAAGATGAAAAATTGTGAACGCCCTACATGTTTGTACATGTACTGTTAGACAGGATTATCACTTTAGTCTTATAGACCCTATCACCCAAAATGACAGGCGTGCTTGCGCTTGAATTATATTCATGCTGTACTGCAGCTATTGCAGAATGCTCGTTGGTTCATTGAAACGATTACATAATTTTCAAATGTTACCACACTCGCCCTCTCTGCAGAAGTGAACGATATAGACCTATCAAATCCATGTATGATCAAAAGGTGAGAAGCCCACAGAATGCATGTGTTACAGATCATTATAGATTGAAAACGGTAGTAAATATTTACATAA…	0	NW_022145611.1:17332344-17332879	NW_022145611.1	17332344	17332879	LOC577660	0	CCGGAAATTTATGAAATAGTGTCATGGTCAGACCGTGTTCAAAGTTTCTTTTTGTGTACTGCATGtttgtatgtactgtacatgtacatactgtatataaAGTGCACACATGTATATGACATGGTATCACAGATCgttatgtaaatatttactaCCGTTTTCAATCTATAATGATCTGTAACACATGCATTCTGTGGGCTTCTCACCTTTTGATCATACATGGATTTGATAGGTCTATATCGTTCACTTCTGCAGAGAGGGCGAGTGTGGTAACATTTGAAAATTATGTAATCGTTTCAATGAACCAACGAGCATTCTGCAATAGCTGCAGTACAGCATGAATATAATTCAAGCGCAAGCACGCCTGTCATTTTGGGTGATAGGGTCTATAAGACTAAA…
Scaffold10:726481-726713	Scaffold10	726481	726713	WHL22.12871	SPU_020054	CCACCTAATTTGCGGGCCAAAATCAATATCATTACGAAGTCCGATCCAGCAATTTCATTATCTCTGCATTTCACTGTTTGCGTGAGTGTCTTGTGTAAATATTGGGCTGTTTTAGTTCGGTGATGAGATAGGTCTGATGTACATGTATGTAGTAGTGTGGGCCGCTCTCAGTGCCACCATTCTACTCACATTCAAAACTAATTAGTTTCTAGGCTGGCCCGGTCTGCCAGCC	0	NW_022145611.1:17281120-17281352	NW_022145611.1	17281120	17281352	LOC577479	0	GGCTGGCAGACCGGGCCAGCCTAGAAACTAATTAGTTTTGAATGTGAGTAGAATGGTGGCACTGAGAGCGGCCCACactactacatacatgtacatcagaccTATCTCATCACCGAACTAAAACAGCCCAATATTTACACAAGACACTCACGCAAACAGTGAAATGCAGAGATAATGAAATTGCTGGATCGGACTTCGTAATGATATTGATTTTGGCCCGCAAATTAGGTGG
Scaffold10:751761-752092	Scaffold10	751761	752092	WHL22.12871	SPU_020054	ATGGGAGCATGCTGTGATTGTCAAGTACAGACAAGGTTTCACAAAGCATGCCATGGGGTCACATACTGGTTTCCTTCCCTTACTTTATAACTTCGTGAGTTGAATTGAGTTCTATCCTGATTTTGTTAGTTTCCCCTGCATACATGTTTTCACAGCAGGGTACCTTTCAGTGCATGAATGTGCTATGTGTGCCTCAATTTATGTTAAAAAGCCTCTTGTTAAGTGGTCTTTACACATTAGTCATGATCTATTGAGTGTTTTTTTTTCCTTCAGAATATACAGTAATTCAGGTTTATGACAACATGTAGGCTAGCTATCCAAAGTTTAGCCC	0	NW_022145611.1:17259006-17259337	NW_022145611.1	17259006	17259337	LOC577479	0	GGGCTAAACTTTGGATAGCTAGCCTACATGTTGTCATAAACCTGAATTACTGTATattctgaaggaaaaaaaaacactcaataGATCATGACTAATGTGTAAAGACCACTTAACAAGAGGCTTTTTAACATAAATTGAGGCACACATAGCACATTCATGCACTGAAAGGTACCTTGCTGTGAGAACATGTATGCAGGGGAAACGAACAAAATCAGGATAGAACTCAATTCAACTCACGAAGTTATAAAGTAAGGGAAGGAAACCAGTATGTGACCCCATGGCATGCTTTGTGAAACCTTGTCTGTACTTGACAATCACAGCATGCTCCCAT
Scaffold10:752130-752517	Scaffold10	752130	752517	WHL22.12871	SPU_020054	AGGGGGCTGAGGTGGTGCCCCCCACCATATATAAGACTATCATGCTCAAAGTTTGATGTCTCGGAGAACTCCACCCCTGTATTTCGAAATCGTATAATCGCAGAGTAACTCTTAAGTCTCAATGGAGAGAAACCTTCTGATCTATTGCATAACACTCAATGTGTGTTGCATGTACACTCCCAAAAACTACCCTTTTTTGCCTATGAACATGAAATGACCTGTGACGCTGCTGACAAGCAGCTATCACACTGGACGGACATCAAGGACCTTTTCTCCGAAAACAAGTAGTCAGGAAAAATCAATTTAGGATATATCCAATTTAGAATGACTGCTTATCGTCAGGTGATACACTCTCATCCCAAGTAGAGCCAGTAACGTGTATTATTG	0	NW_022145611.1:17258580-17258968	NW_022145611.1	17258580	17258968	LOC577479	0	CAATAATACACGTTACTGGCTCTACTTGGGATGAGAGTGTATCACCTGACGATAAGCAGTCATTCTAAATTGGATATATCCTAAATTGATTTTTCCTGACTACTCGTTTTCGGAGAAAAGGTCCTTGATGTCCGTCCAGTGTGATAGCTGCTTGTCAGCAGCGTCACAGGTCATTTCATGTTCATAGGCAAAAAAGGGTAGTTTTTGGGAGTGTACATGCAACACACATTGAAGTGTTATGCAATAGATCAGAAGGTTTCTCTCCATTGAGACGTAAGAGTTACTCTGCGATTATGCGATTTCGAAATACAGGGGTGGAGTTCTCCGAGACATCAACCTTTGAGCATGATAGTCTTATATATGGTGGGGGGCACCACCTCAGCCCCCT
Scaffold10:754685-755025	Scaffold10	754685	755025	WHL22.12871	SPU_020054	CCAGTAGCTGAGTAACATAGCTTAAACACATCCCTGGAATACGGGGGCAAGGCTGGAGAAACAGATGCTGTTTAGAAAACCGAATTATTTGTCACTCACGAGAGGAAATTGGCTCAAGCATGCTGCCGGAAAAAGGGTGGAGGAAAGGACAGATTTTCAGTCAGTGGGGTTATGACAAACTCACATGATGCGTCTGCGTTTATCCCCTGATAGAAGATTAACCCTGAGCCTTCGTGTATACATGTTCACATTCATGTTTGTGTAAGAGTTGGCAGGCGTTGATCCACGTTTTATTTCCTTATTTGCTTTTGCCTATTTGCACCTTGAACTGGGTCAAGCA	0	NW_022145611.1:17255946-17256290	NW_022145611.1	17255946	17256290	LOC577479	0	TGCTTGACCCAGTTCAAGGTGCAAATAGGCAGAAGCAAATAAGGAAATAAAACGTGGATCAACGCCTGCCAACTCTTACACAAACATGAATGTGAACATGTATACATGAAGGCTCAGGGTTAATCTTCTATCAGGGGATAAACGCAGACGCATCATGTGAGTTTGTCATAACCCCACTGACTGAAAATCTGTCCTTTCCTCCACCCTTTTTCCGGCAGCATGCTTGAGCCAATTTCCTCTCGTGAGTGACAAATAATTCGGTTTTCTAAACAGCATCTGTTTCTCCAGCCTTGCCCCTGTATTCCAGGGATGTGTTCAAGCTATGTTACTCAGCTACTGTATGG
Scaffold10:758189-758557	Scaffold10	758189	758557	WHL22.12871	SPU_020054	GAACATGGCCATGAAGTAAGTCTCTAGTCCCATGTATGATTCATGGCGTCTGTACATGTCAGCTGGATCAGCAAGAGAATTGCCTTTCCTGTGGGACAGGATCCTAGCTCATAGCCACTGTGAAGCATCGTTTCCTAATTGGCGATGGCACAGTTCAAGGATGTGTCTCACAGAAGCCCAGGACTTTGCTCAGGCTCTTAAAAGCTCCTAGCTGCCCTAGCGCTATGGTCATTGATGTTTTTAATGAGGAAGGTCATTAACTGCTCCCTAACGAACACCCGGATTAATGAGAGGGTGCCTCAACAATTTATGTCTCGTGAGCTGTACTTAACTGGACAGACTATTCTTGTCTCATTAGTCAGTCTCCG	0	NW_022145611.1:17252464-17252832	NW_022145611.1	17252464	17252832	LOC577479	0	AGGAGACTGACTAATGAGACAAGCATTGTCTGTCCAGTTAAGTACACCTCACGAGACATAAACTGTTGAGGCACCCTCTCATTAATCCGGGTGTTCGTTAAGGAGCAGTTAATGCCCTTCCTCATTAAAAACATCAATGACCATAGCGCTAGGACAGCCAGGAGCTTTTAAGAGCCTGAGCAGAGTCCTGGGCTTCTGTGAGACACATCCTTGAACTGTGCCACCGCCAATTAGGAAACGATGCTTCACAGTGGCTATGAGCTAGGATCCTGTCCCACAGGAAAGGCAATTCTCTTGCTGATCCAGCTGACATGTACAGCCGCCATGAATCATACATGGGACTAGAGACTTACTTCATGGCCATGTTC
Scaffold10:762577-762932	Scaffold10	762577	762932	WHL22.12871	SPU_020054	CCCCGTACTATAGGTGGGGCTAAGACCCCCCCTTAACCCCACCTATAGTACGGGGTTAAGCAAAATATTGCCAGTGTGAAAACAGTATAACCGGAAATAGTGTTACAACCCCCGTCTTGACTGCATCCATGCTTGGCAGGAGTTTCACTCCTTAATGAAATTCCAGGAGTATGACGTGTGTCAAAGGTCGTATTACGGAGACTGATCATGCGGTCTAACCTTACATGATTCACAAATTTTCTTCTCCTTTGAGCCAAGTATGTTCATGTGGTTTTGATTTCAAACAAAGAGGGTGACAATGAGGTCTGTTGTTGGTGCTAATATTCCCCAAATGTTCTTGCCAACATCCCAGAGG	0	NW_022145611.1:17248092-17248447	NW_022145611.1	17248092	17248447	LOC577479	0	CCTCTGGGATGTTGGCAAGAACATTTGGGGAATATTAGCACCAACAACAGACCTCATTGTCACCCTCTTTGTTTGAAATCAAAACCACATGAACATACTTGGCTCAAAGGAGAAGAAAATTTGTGAATCATGTAAGGTTAGACCGCATGATCAGTCTCCGTAATACGACCTTTGACACACGTCATACTCCTGGAATTTCATTAAGGAGTGAAACTCCTGCCAAGCATGGATGCAGTCAAGACGGGGGTTGTAACACTATTTCCGgttatactgttttcacactggcaatattttgcttaaccccgtactataggtggggttaagggggggtcttagccccacctatagtacgggg
Scaffold10:763365-763625	Scaffold10	763365	763625	WHL22.12871	SPU_020054	CTTTTATCTCCTTGGCTTTTGTTAATGTCCTTAATCACCCTCTTAATCTTCATTAATCTTCATTAATCTTCATTGTTGGGTTCATAGCTACGGTACTAATAATGCTCAGGTAGACACATAGTGTAGTTTCTGAGAAGGAGATCAACTTCCTTGTATGAAAGACAAACATTAGCTGAGAATGATATTCACCATTAGAGTGGAAAAGGAAGTAAACCCTTTATCACAATGATATCAGTGTTGGTCCCTTTCTGATTTCCTTA	0	NW_022145611.1:17247399-17247659	NW_022145611.1	17247399	17247659	LOC577479	0	TAAGGAAATCAGAAAGGGACCAACACTGATATCATTGTGATAAAGGGTTTACTTCCTTTTCCACTCTAATGGTGAATATCATTCTCAGCTAATGTTTGTCTTTCATACAAGGAAGTTGATCTCCTTCTCAGAAACTACACTATGTGTCTACCTGAGCATTATTAGTACCGTAGCTATGAACCCAACAATGAAGattaatgaagattaatgaaGATTAAGAGGGTGATTAAGGACATTAACAAAAGCCAAGGAGATAAAAG
Scaffold10:839376-840133	Scaffold10	839376	840133	WHL22.13090	SPU_020072	CTGCAATATCCGACAGCACATTATTTGATGAAGAAGACATGGCGGAATCACCTGAAAGAGCTAGAGCAGAGGAGCCTGTATCAATTTTTGAAGATTCAGAATCAATTTGACTTGTCAGACAATCAGCTTGTGATGCAATTGAATCATCAATTAACCCATTGTTACTTGAAGTTGATGTGCTGTCAGCAATCAACATTTGATCTTGATCTACAACTTCGGGAAAACTGTGTGCTTCTCCATCTCCTTGTCCATGCTGTTCAGCTTCTGGAATGACAGTTCCAGAATCTTGTTTATCATCATGATCATTTAACACGCCGCTACCCGGGGCTTCGGTGTTTGCGTCGGCTGTCTCTCCTGCTGCGGCAGAGAAGTTCATGTCATCTTCCTGTCCGGATTCGT…	0	NW_022145611.1:17175516-17176273	NW_022145611.1	17175516	17176273	LOC587367	0	GACTTTATTATGAACATCAATGTGCAACAATCAGGTGACCTCCAATAAAGGGGTTAGACTCTATCCGGGCGTTTTATATAGTTCTCATGCAAAGGTAATGTACTCAGTGCGTGGACATCATAATTAGACAAAAAACGACTGCGCGAGGTCCCCAGTACATTTTCAGGGTTTACTTTTGTTGAGAGCAGCTTTGATATGGCGGACGCGGAGGGTGTTGAAAAAGTAGATTCTACTCCTTCTGATCCCGATTCTGAGACCCAAGATGATTTAAAACAACAAGGCTTCAACGGGGAGAATACTACAGGAACAAAGGAAGGAAAATCGCTGGATTTATTGTCCGAGGCTCTTTCAAAAATGGACGAATCCGGACAGGAAGATGACATGAACTTCTCTGCCGCA…
Scaffold10:893828-894194	Scaffold10	893828	894194	WHL22.13294	SPU_020070	TCAAATTTTTTGGGCTGTATCAAGAAAAGAAAAGAAAACTCATTACAATCCAAAATAAGTGCTTGTCAAAACCATCTAGGAACCGACATCTTTTTCTCTTGGTAATATACATAAAATGAGTATTTGTCTACATCATTACTTGTAAATGGCCAAAGATAAACTGATTGCATCTTTGTGCAGCACAGATCTGCATATTTTAATCAGAAGTTGATTGCAATGACTTAAGACGATTCAACCATAATGGTCATTTTGTTAATGTCAAAACCATACATTAATATGCAGATCTGGAAACAACTGCAGAATACACAGGGGTAGTTTGGCTAATATGTTTTACGTCATTAATAAAGGTTACCATAGGTTTTAATT	0	NW_022145611.1:17134091-17134459	NW_022145611.1	17134091	17134459	LOC576982	0	AGCTAAACCTATGGTAACCTTTATTAATGACGTAAAACATATTAGCCAAGCTACCCCAGTGTATTCTGCAGTTGTTTCCAGATCTGCATATTAATGTATGGTTTTGACATTAACAAAATGACCATTATGGTTGAATCGACTTAAGTCATTGCAATCAACTTATAGTCTGATTAAAATATGCAGAtctgtgctgcacaaagatgcAATCAGTTTATTTTTGGCCATTTACAAGtaatgatgtagacaaatactcattttatgtacattacCAAGAGAAAAAGATGTCCCTAGCTGGTTTTGACAAGCACATATTTTGGATTGTAATgagttttctttccttttctcttgatACAGCCCAAAAAATTTGA
Scaffold10:898442-898807	Scaffold10	898442	898807	WHL22.13294	SPU_020070	CTGGTGAAGGAAACAAAAACATCCATGTAAAACCATCTTATCACTATTCCATTGTATTACAGGAAGGTGACAGAAATTACATGATAGGGTTCAATCATAAAGGAGAATAATCTACATCAAATTAGCCTGACTGAGCATTTTGTTTTGTCATACGACTTTGAATAATCGCTTTATTGGCTTCAAATAACGGACAGTTGGGCAGACTATTCTGACAGGTATCTCATAGCCAATTTGACCCTCTCTCTGACTTAGATGCAATTGGGAGAGCTTCTCAATGAATTCACATGGTGGTATATTGACAATTTCAGGAGTAAAATCTCTGCTTTTGATGTCATATTTTATGAGAATTACAGATCCTTTTCATA	0	N/A	N/A	N/A	N/A	N/A	N/A	N/A
Scaffold10:928855-929113	Scaffold10	928855	929113	WHL22.13294	SPU_020070	TCATCATCGTGCCAAACAGGAGTCTAATTCAAGATAGCCACCAGCCCACACTTCTGAGTCATACACTCCTCCATACTTGATAATGTTACTGAGATAGAGTTGACATTTGACCTATAAGAAATACAAATACCCCCCCCCCCCCACCCACCCTCCCTAAAAAAAAAAAAATATTGGGAAAATTTACTTTTTGTTATATATATGCAGTCGAAGACTAATGAAGGAGTTACACAATAATAATAATAATGATAATAATAGTGG	0	NW_022145611.1:17097887-17098146	NW_022145611.1	17097887	17098146	LOC576982	0	ccactattattatcattattattattattgtgtaaCTCCTTCATTAGTCTTCGACTgcatatatataacaaaaagtaaattttcccaatattattttttttttagggagggtgggtggggggggggggggtatttgtatttcttataGGTCAAATGTCAACTCTATCTCAGTAACATTATCAAGTATGGAGGAGTGTATGACTCAGAAGTGTGGGCTGGTGGCTATCTTGAATTAGACTCCTGTTTGGCACGATGATGA
Scaffold100:164533-164922	Scaffold100	164533	164922	WHL22.6050	SPU_021228	CTGACCGAAGCAAAATATAATTATTGTAACCTTTTTATCATTTGTTCCGATTTAGTTATCAAACCTTTTCATCTTTGTGTTCTCTTTTTGCAGAAAACAATTTTCTTCCTTCATTTGAAGAGTCATCGTTGAGTGCGGTGGTGTATAAAAATAATGTAGATGACGTCATTACATACGTCACCGCCACGGATAAAGACGGCGAAAAATGCCAAGACAGCGACGCGGACTGTCCATGCGCGCGAATTCTTTACGCCCTTGAGAGCGGAAACGAGGAATCTCTGTTCCGCATTCATCCAAAGACGGGAGCCATCCAACTCTCGGGAAAAGGTATCCGGGACAAGAGTGAATTCCCGCGCGCAGGAACAAAGGTGAAATTGGTGGTATCGGCG	0	NW_022145612.1:59800455-59800844	NW_022145612.1	59800455	59800844	LOC584294	0	CTGACCGaagcaaaatataattattgtaaccTTTTTATCATTTGTTCCGATTTAGTTATCAAACCTTTTCATCTTTGTGTTCTCTTTTTGCAGAAAACAATTTTCTTCCTTCATTTGAAGAGTCATCGTTGAGTGCGGTGGTGTataaaaataatgtagatgacgTCATTACATACGTCACCGCCACGGATAAAGACGGCGAAAAATGCCAAGACAGCGACGCGGACTGTCCATGCGCGCGAATTCTTTACGCCCTTGAGAGCGGAAACGAGGAATCTCTGTTCCGCATTCATCCAAAGACGGGAGCCATCCAACTCTCGGGAAAAGGTATCCGGGACAAGAGTGAATTCCCGCGCGCAGGAACAAAGGTGAAATTGGTGGTATCGGCG
Scaffold100:188592-188928	Scaffold100	188592	188928	WHL22.6053	SPU_021228	TACTCTTTAACATTAACATGCCAACACGTCGACTATAGTTTGTCATTACCAAATCGAAACGGTAAGAACGATATCCAAACACTCTTTACCTTAAAGTTTTTCGTGATCATCCAATCGATGAAAATGTTCACAGCTATGCAAAGAGATATTCACTTTAGGCCTACTCAAACTCGCACGTAAATTATGCAATTCTAAACCTATTTCACATCAGCTCGCCAGCTCACATCGCAATTACCATAGTAATGTTGCAATATCTGTACCCCTTTCACCGCAATTTAATCTCCCCGGTGAGATCGAGCGAGCAAATGAATTGACATCCATATTATTGATCTTTCT	398	NW_022145612.1:59825444-59826325	NW_022145612.1	59825444	59826325	LOC584274	94	TACTCTTTAACATTAACATGCCAACACGTCGACTATAGTTTGTCATTACCAAATCGAAACGGTAAGAACGATATCCAAACACTCTTtaccttaaagggaaagtccaccctgaaattaagttagttttaataggagtagaaaaattagagaaacaagtcagtgaaagtttgagcaaattccgattaaaaataaggaagttaggatttttgaagttgtgatcaatcaaacaaaaattggcaactctatgacgtatcatgcgagctcaacttccatttgctcagtactaaaaaaatctaaatttttcattttccctcaagaaaaatttaaaccatacatgcaccctaaatataataattgcaaatatgtttctatactccccctgcaaggaacaaatatata…
Scaffold100:227914-228203	Scaffold100	227914	228203	WHL22.6068	SPU_021229	TGGATGAGGCAAAATGTCATTAAGATAAAAACAAAATTTGTTCTTGTTCACTTTGTAATCCCACAAAAATATGGATTTATTTGGTATAAATGGTGATAAATCAACCTAACTTTAAAATCACATTTGCTCAATGCATTTAAAAAAGGACCAGAATGCACAATTGACGGAAATACTTTATAACAGATTTCGTACAACTCTTTCTAGTTTCTACATGTACACAGAGATGTATTCAGAGTCAAAGTCAAAGTTAAATATATCTTTTGTAAATATAAATTTGATTATTATGATA	0	N/A	N/A	N/A	N/A	N/A	N/A	N/A
Scaffold100:305940-306181	Scaffold100	305940	306181	WHL22.6147	SPU_004775	CCAGTCCAAAGAACTCTACAACACCGTGAGACAAATCTTTGGGGTACTTGTGTCTATAACGAGTCCCCTTCATTATGATTCGCTGCATGCACTATTATAATAGCGATGTAATTTTAGAGATCATTTTGCAGACATGTCTACTACTGTGCATCAAACATGTCAGACTTACCTGTTAGTAGTCCCATTAATGGGGTAGAGTCAGTCCATTGAGGGGGCAAAGGTTTTACTCGGGAAATGACAT	0	NW_022145612.1:59441664-59441938	NW_022145612.1	59441664	59441938	LOC585539	0	ATGTCATTTCCTGAGTAAAACCTTTGCCCCCTCAATGGACTGACTCTACCCCATTAATGGGACTACTAACAGATAAGTCTGACATGTTTGATGCACAGTAGTAGACATGTCTGCAAAATGATCTCTAAAATTACATCGCTATTATAATAGTGCATGCAGCGAACCATAATGAAGGGGACTCGTTATAGACACAGGTACCCCCACAGATTGATGTTTGTCTTTGTCTCACGGTGTTGTAGAGTTCTGATTTGACTTAGGAAATTATTTGGAGTAG
Scaffold100:317606-317931	Scaffold100	317606	317931	WHL22.6147	SPU_004775	CAGGGGAAAAAAGCATATAAAATAACATACGTGCTGAATGTAAAAATAAAAAGTCTACGTCATAATAGAATATATTACAAACCAGATAGAACCGGTATCAACATGGCTGCAAAGCCAGACATGCTGAGTGGAAAAATACAAAGCAAGGGAAATTAAGTCTCTCTAACCGCTATTTCGAAAATGGGATAACAATACTTATTGAAAACATGTACAATTTCAACAAATGTTTAAGAAATCGTGACATTTGGACACAATAATACGAAATCATTCACTGCAACGACGCACGGATTCTATAGTAAACAAATATACCATGCACGGAGAGGCT	4768	NW_022145612.1:59429936-59430261	NW_022145612.1	59429936	59430261	LOC585539	4663	agcctctccgtgcatggtatatttgtttactataGAATCCGTGCGTCGTTGCAGTGAATGATTTCGTATTATTGTGTCCAAATGTCACGATTTCTTAAACATTTGTTGAAATTGTACATGTTTTCAATAAGTATTGTTATCCCATTTTCGAAATAGCGGTTAGAGAGACTTAATTTCCCTTGCTTTGTATTTTTCCACTCAGCATGTCTGGCTTTGCAGCCATGTTGATACCGGTTCTATCTGGTTTGTAATATATTCTATTATGACGTAgactttttatttttacattcagCACGTATGTTATTTTATATGCTTTTTTCCCCTG
Scaffold100:436403-436775	Scaffold100	436403	436775	WHL22.2583	N/A	CTATCAATATCTGCGCTTGCAAATACAAAATATTTTATTCTTAGATCAATATTCAAATACCTAATTGTACATATTTCGCTTCTCAAATAATTGAATATTCAAGTATAAATGAAATGGAATGAAAATAACTGGTAATCGAATGAAAGTGTATCTTTGGGAGCATATCAACGGAATAACAAAAAAAAGAGGAAATAACATATACTCACTTTACGTGCGAACTTTGTTGCATTGCGTAGGGGGCGACAGGTGGTTTGTAGGCCCTATGTTAATAAAATAATAAAACACAGATAATGTTACATGCCACTGCTTTCATTGTATATACTTCTTTCTCTTTCATTTATCTATTTCTTTGAATGTATGTGTTTTAGAAAG	0	NW_022145612.1:59279813-59280185	NW_022145612.1	59279813	59280185	LOC752531	0	CTTTCTAAAACACATACATTCAaagaaatagataaatgaaagagaaagaagtatATACAATGAAAGCAGTGGCATGTAACATTATctgtgttttattattttattaacataGGGCCTACAAACCACCTGTCGCCCCCTACGCAATGCAACAAAGTTCGCACGTAAAGTGAGTATAtgttatttcctcttttttttgttattccGTTGATATGCTCCCAAAGATACACTTTCATTCGATTACCAGttattttcattccatttcatttatacTTGAATATTCAATTATTTGAGAAGCGAAATATGTACAATTAGGTATTTGAATATTGATCtaagaataaaatattttgtatttgcaaGCGCAGATATTGATAG
Scaffold100:452390-452757	Scaffold100	452390	452757	WHL22.2583	N/A	GTCCCCAAAAGACAAAGACAGCAGACTACCACATTCAAGATCAAGTTGATCGAATTTCTGACGTGTGCGCACCCGCCACAAACTTCCTAATGAGCTGGTGTGATGTTTGCTTGACATCAACATAGGGCGTTGAACGTACATGTCATGTTTATACAGTCAACTTGAGTGAATTGAAGCAAGTATTGATTAATGGTCGTTTGGTTTTGTCCTACACACTGTGTCTACATGGTTTATGCCAAATGTTTTGATGTTCCCCTTTTCCTTTGCTTCACCAACATGCGATCAAACAAAAGGACCCGTATTGAACACCGTCAGTATCTGGAGACCATGAGACATGGTGTATTGATTTTGACCATCATGACTCCGT	7029	NW_022145612.1:59261999-59262366	NW_022145612.1	59261999	59262366	LOC752531	0	ACGGAGTCATGATGGTCAAAATCAATACACCATGTCTCATGGTCTCCAGATACTGACGGTGTTCAATACGGGTCCTTTTGTTTGATCGCATGTTGGTgaagcaaaggaaaaggggaacatCAAAACATTTGGCATAAACCATGTAGACACAGTGTGTAGGACAAAACCAAACGACCATTAATCAATACTTGCTTCAATTCACTCAAGTTGACTGTATAAACATGACATGTACGTTCAACGCCCTATGTTGATGTCAAGCAAACATCACACCAGCTCATTAGGAAGTTTGTGGCGGGTGCGCACACGTCAGAAATTCGATCAACTTGATCTTGAATGTGGTAGTCTGCTGTCTTTGTCTTTTGGGGAC
Scaffold100:561347-561454	Scaffold100	561347	561454	WHL22.2783	SPU_008347	AAACTTTTACTTGTAATATATTTAGAATATGAAGGTATTATGAAGAGCCCTGCTTTTCAGGGAACATTTTTTCTCTATTACTTACTTTGGTTTACTTTGGTGTCGAG	0	NW_022145612.1:59157741-59157848	NW_022145612.1	59157741	59157848	LOC581730	0	CTCGACACCAAAGTAAACCAAAGTAAGTaatagagaaaaaatgttccctgaaaagcaggGCTCTTCATAataccttcatattctaaatatattacaagtaaaagttt
Scaffold100:563771-564255	Scaffold100	563771	564255	WHL22.2783	SPU_008347	GTAGCATGCACATGTTACTGTGTACTCTTTATACTTAACTTGTTGAAGGTGAGTTGTACATGTAGATGCACTAAGAATGTGGTCTGCGAGTAAGGCCATGACTTCATGAAGGTCATTTTCATCTTTCTTGACCTACAACAAGATTCTTGGAAGCCCTTTCATCATCAATATTGATTGATGACTACCTGTAGTCTCCCCTTCCCCCCCCCCCCCTCCCCTTTCAATGATAGATGGAGGATGTACATGTGATGTATTTGCTACTTGTCCTAAACCAGTCAATAAGATTAGGGAAACCTATTTTGTAGACAATTGCTCTCCATTGTTTGGAAGTGCATTGAATTGACGCTTGCATTGTGTACATGGTCAGCCATGGTAGGGCTGTCTGATCAAGTAAACAAA…	0	NW_022145612.1:59154966-59155450	NW_022145612.1	59154966	59155450	LOC581730	0	AGCTTGCAAGTTGCAAAATCCCTGACATGAAGGAACCATGTGGTCAACAAGTTCACCTTGACCAAGGCCATGTCTACTTCATGTTTGTTTACTTGGTCAGACAGCCCTACCATGGCTGACCATGTACACAATGCAAGCATCAATTCAATGCACTTCCAAACAATGGAGAGCAATTGTCTACAAAATAGGTTTCCCTAATCTTATTGACTGGTTTAGGACAAGTAGCAAATACATCACATGTACATCCTCCATCTATCattgaaaggggagggggggggggggggaaggggagacTACAGGTAGtcatcaatcaatattgatgatgaaagGGCTTCCAAGAATCTTGTTGTAGGTcaagaaagatgaaaatgacCTTCATGAAGTCATGGCCTTACTCGC…
Scaffold100:567409-568205	Scaffold100	567409	568205	WHL22.2783	SPU_008347	GAATGATTTTGCATTACATAATACAGGCCAAAGTATGTTGATGAGCAACCAAGTACTGTACTAGGACTATTGACAACTGTCTCACCTGAGGATGTCATTATTTTATGGACTTTGGATAATCTTAATGGCAACCGATCTTGACCTGATCTAAATGCAGGGTCAATTGGGTTATAGAAAGCCTACATGATGTTCAATGTCTGTACATGTGTTTAGGTGTCCAAACATGTGTCAGACCATGGACCTACATGTACATGTACTCCTATGGTCAGACCATGGTCAGACACTATTCTGGTGAGGGATTGTCCTAAAGTTTGTTGAATTTTGGTCATTACAATCAATCATCATTAATCACTCACTAGTCTAGTATGACACTTACATGTGTATGGGAGCAGCTAGGAT…	0	NW_022145612.1:59150801-59151579	NW_022145612.1	59150801	59151579	LOC581730	0	ccccaatagactgtagccTGTAGTCTAttaaaaaccgttgggaaaacgaaaaatgaaatgttgatttccaatcataaatatcttgataaccagACTGGTGagcggcttgtaaaagtcatggtattcctgactgacctaaagatttataattatgattgcagcatgagctaaatccaggattttgtttcagaatctgaggcaatgttacagagtcactttaaacCACTCCAACTCCCCACTTCCATCTTTTCCCAATGGGGACAATGGTCACTTCCTGCAAAGCATGTTGTAAAGTTATACTGCTTTGTTGCTCAGGGTTGCCATGGTCATGACAGTTCAGGATCCCACAACACCAGCATCACGAAATCCCACACCTCTTGGAACACCTTGTACAGGTAT…
Scaffold100:569629-570160	Scaffold100	569629	570160	WHL22.2783	SPU_008347	GAAAGTAAAGGGAAGTGGGAGTTGTACATGTAAACAACGGAACTGCTTTATTTTCATTTGCTTTAGAGTTTAGAATTGTGATTCACTTTTTAAGCTCTTGAGGAAATAGTAATATTGTATGACAGGATGAGAGCTAGCTCTACATAATAAAAATATATCAGAAAATTCAGTCAGTTGCATGCACATGCTTTATCATGCATGCAGGTACATAATTTCTGCACTTTTACTACTAGAGTGTACACTGTAGAATGCTTAAAAGATTAGCGCCCCCCCCTCCCTAATGTTGTTAAATAATGCATCCTTTGTAGGGAGCCAGAAGGATGTTAACTTGTATCACTTAATGCAATTAACACCCTTCATAATTTGAATGTCAACTGTTAATAATGATGATCATAATAA…	0	NW_022145612.1:59148825-59149353	NW_022145612.1	59148825	59149353	LOC581730	0	ATTAAACTTTCTTTGTTACTTAGCCTTTGTAAACAGAGAAGTTATGAAAAGGTCTGCTTCTTTTGTTTATACTTGAGtaaaatgtacacatgtactaaTTTGTAAAATGTAGTAGAAGTATCgtcattattatgatcatcattattaacaGTTGACATTCAAAATTATGAAGGGTGTTAATTGCATTAAGCAATAcaagttaacatccttctggctccctACAAAGGATGCATTATTTAACAAcattagggaggggggggggcgctaaTCTTTTAAGCATTCTACAGTGTACACTCTAGTACCAAAAGTGCAGAAATGATGTACCTGCATGCATGATAAAGCATGTGCATGCAACTGACTGAATTTTCTgatatctttttattatgtaGAGCTAGCTCT…
Scaffold100:598906-599238	Scaffold100	598906	599238	WHL22.2790	SPU_008350	CTCAACGATCAGATATTCAAAGATCAAATACATGAGCGACAATGTAGCTGACAGGAGAGTATACGTAATGACGTTCAGGCCTCGATTCATACAGGGCAATAATTATTGAACCAGTGTTATGCAAGCTATAAATCCCCCCCCCCCTCTCTCTCTCTCTCTCTCTCTCTCTCTCTCTCTCTCTCTCTCTCTCTCTCTCTATTTCTCTCTCTCCATATTGCATTCAGAATCTCTCATTAAAAAAACTCATTTACAATCTTTCAGTATTTTAATAGGCTCATTAAATCCTCCCTTTTTCTTTCTTCATATTTTCGTTCCTCTCAGGAGCTAATCCG	0	NW_022145612.1:59106794-59107115	NW_022145612.1	59106794	59107115	LOC105444287	0	CGGATTAGCTCCTGAGAGGAAcgaaaatatgaagaaagaaaaagggaggatTTAATGAGCCTATTAAAATACTGAAAGATTGTAAATGAGTTTTTTTAATGAGAGATTCTGAATgcaatatggagagagagaaatagagagagagagagagagagaaagagagagagagagagagagagagagaggggggggggatttataGCTTGCATAACACTGGTTCAATTGCCCTGTATGAATCGAGGCCTGAACGTCATTACGTATACTCTCCTGTCAGCTACATTGTCGCTCATGTATTTGATCTTTGAATATCTGATCGTTGAG
Scaffold100:623426-623620	Scaffold100	623426	623620	WHL22.3338	SPU_008348	TCCAATTAGTCAACACTGTAATACAATACACCCTTTTATGAAAGCAATAACAAACAAGCACCAACCAGTGAAGTGTAATCAATAGTCTTGTTGTTTACATGGAGAGTTCCCATGGAAACAGGGTACATACATACAGGTTTAAAGAGTGGCTGCTCCAAGACCTCTATCATAGAACTTTGTGTACTTCAATAGTT	0	NW_022145612.1:59081672-59081866	NW_022145612.1	59081672	59081866	LOC579958	1541	AACTATTGAAGTACACAAAGTTCTATGATAGAGGTCTTGGAGCAGCCACTCTTTAAACCTGTATGTATGTACCCTGTTTCCATGGGAACTCTCCATGTAAACAACAAGACTATTGATTACACTTCACTGGTTGGTGCTTGTTTGTTATTGCTTTCATAAAAGGGTGTATTGTATTACAGTGTTGACTAATTGGA
Scaffold100:663933-664083	Scaffold100	663933	664083	WHL22.3803	SPU_019581	AGCAATACTCGGCAGTCCCATGACGAGGTCCTCACGGCTGTTATCGGTGATTTCGGTTAAGTTCTCGATGATTCGGGAATAGTCGGAGAAATGCGCTATCCCGACGAAGCTACCGTCATCGATGGTGTAGCGAAGATATTGAGTGGCTGC	0	NW_022145612.1:59043233-59043383	NW_022145612.1	59043233	59043383	LOC592210	0	GCAGCCACTCAATATCTTCGCTACACCATCGATGACGGTAGCTTCGTCGGGATAGCGCATTTCTCCGACTATTCCCGAATCATCGAGAACTTAACCGAAATCACCGATAACAGCCGTGAGGACCTCGTCATGGGACTGCCGAGTATTGCT
Scaffold100:674088-674355	Scaffold100	674088	674355	WHL22.3803	SPU_019581	GAGCCTTCATTCTGAGAGTCGGGGTAATTAAGACAGATATATTCAACGACGTCAAATAGAATTGTTTGCTGATCATCTGGACATCTCCCGGATACTATCTTTGTTGCTACCTTGTAATCTTATTTACTAATCAAATTGTCGAATCCGGACTTACAACACGGTCAACATGTATACACACCTAAAATAAACCTCACCGAGCAGACGTACTACTTGTATATACCATATCTCATTCGTGAGCAATTGCTAGTACAACATTACAGAACGCGT	0	NW_022145612.1:59035579-59035846	NW_022145612.1	59035579	59035846	LOC592210	0	acgcGTTCTGTAATGTTGTACTAGCAATTGCTCACGAATGAGATATGGTATATACAAGTAGTACGTCTGCTCGGTGAGGTTTATTTTAGGTGTGTATACATGTTGACCGTGTTGTAAGTCCGGATTCGACAATTTGATTAGTAAATAAGATTACAAGGTAGCAACAAAGATAGTATCCGGGAGATGTCCAGATGATCAGCAAACAATTCTATTTGACGTCGTTGAATATATCTGTCTTAATTACCCCGACTCTCAGAATAAAGGCTC
Scaffold100:684996-685402	Scaffold100	684996	685402	WHL22.3426	SPU_019579	CCTTCTTTTTGTTAAATTTTAAAAATTCCTATTAATTCATAAAACTCCAACATGAGCTCATGTAAAATGAAATTGTAAAATCATGGCCCAGATTTGCACATGTTTTTGTCAAAGTGAATCCTTAGGCGAGCTGCCTTTTACCAATGTGCATTCACATTATTTTCTTCACACCTATCTACAAAGATTACTGAATCTGCACACACAGGGTAGGCCTATCTATCTAAAGGTATGTTGTTGGTGATAGGTTCTATGTGAAAGGTTTATAGAGAAAGATATATACCGGCCGGTAATTAATTCTATGTATACAATTTAAAAATGCAATTTTTAGCCCCCCCCCCCTCCCCACTCCCCCCTCCCTTGGTATTTATTGATTTCTCTCATTCACTAAACTTGTAGCTT…	0	N/A	N/A	N/A	N/A	N/A	N/A	N/A
Scaffold100:688233-688613	Scaffold100	688233	688613	WHL22.3426	SPU_019579	CCTCATTTATGTCTCATATTCTAGATGGATGAAATTGAAAGTGTAGTGATGCTTAACATTTTGTGTGAAATTCAAGTTGAAATCATACCTTGACTTACTCAGATTAATAAATTGATTTATGGATAATGTAGAAACAAAAATGACAAGAGTAGTATAGTAGGAAAGAAATGGTTACACTTATTTGAATTCAATAGTAAAACATATCAGAACAAACATAGTCAATGCAAGCTACTTATGCATACCATTTTTCTTCCAGCCTTTAACCATGCACATGGCCTGTGTGACATTTCGTATGTCATTGGAAGAGGTTCTAGCGGCTGCTACCATCAATGCAGCCAAGTCCATCGGGAGGGCAGCAACCCATGGGTCATTGGAGGTCG	0	NW_022145612.1:59021483-59021861	NW_022145612.1	59021483	59021861	LOC592194	0	TGACCTCCAATGACCCATGGGTTGCTGCCCTCCCGATGGACTTGGCTGCATTGATGGTAGCAGCCGCTAGAACCTCTTCCAATGACATACGAAATGTCACACAGGCCATGTGCATGGTTAAAGGCTGGAAGAAAATGGTATGCATTATAGTAGCTTGCTTTGACTGTTTGTTCTGATATGTTTTACTATTGAATTCAAATAAGTGTAACTATTTCTTTCCTTCTATACTagtcttatcattttgtttctaCATTATCCATATATCAATTTCTTAATCTGAGTAAGTCAAGGTATGATTTCAACTTGAATTTGACACAAAATTTTAAGCATCACTACACTTTCAATTTCATCAATCTAGATTATGAGACATAAATGAGG
Scaffold100:688934-689097	Scaffold100	688934	689097	WHL22.3426	SPU_019579	CCCTTTGCCCTCTCTCATATACATCTTCTGTTTCCATGGCAACAGATGGGAGCACTTTATCTATCAGATGGGATGTCATCAGGAGCTGCTCAAGATGGTGCTTAAGAGAGGAGAAATGGTCCATTCCAGTCAGCTCTAGCCACCTACCACTAAGCTCTATACC	0	NW_022145612.1:59020983-59021139	NW_022145612.1	59020983	59021139	LOC592194	0	AGAGCTTAGTGGTAGGTGGCTAGAGCTGACTGGAATGGACAATTTCTCCTCTCTTGATCACCATCTTGAGCAGCTCTTGATGACATCCCATCTGATAGATAAAGTGCTCCCATCTGTTACCATGGAAACAGAAGATGTATATGAGAGAGGGCAAAG
Scaffold100:891381-891621	Scaffold100	891381	891621	WHL22.3016	SPU_006104	TACTCTTACAGAGCCCCCGGAATATCAATGTTTAACAGTTTACTCATCACATTTCCCCCACCCCCCCCCCCCACCCCCACCCATTAATGTGGAGCACCAATTATGCTCTTCTGTCTCCACTACCGTACTTGAATATTACAGTAGGGGGATACTGATTTGTAAAATGAGTGAAGATTGCCTTGACATTTCTTCTACACAAATATATCCCTTGGTATAATTTGTTTTGAAATTTGGTTGCAG	0	NW_022145612.1:58766975-58767216	NW_022145612.1	58766975	58767216	LOC100892914	0	CTGCAaccaaatttcaaaacaaattataccaAGGGATATATTTGTGTAGAAGAAATGTCAAGGCAATCTTCACTCATTTTACAAATCAGTATCCCCCTACTGTAATATTCAAGTACGGTAGTGGAGACAGAAGAGCATAATTGGTGCTCCACATTaatgggtgggggtgggggggggggggtgggggaaatgTAATGAGTAAACTGTTAAACATTGATATTCCGGGGGCTCTGTAAGAGTA
Scaffold100:970693-970852	Scaffold100	970693	970852	WHL22.3020	SPU_006108	TGCGGAAAAATCACCGACTGAAAAGCTCAGTGATGTTTTGGCGCGTTTTAGTTGGTAATGCGCATGCGCGGCACTCCGATGCAAAAACTTTCCTCTTATGTTATTTTTTTTTTTTTTTTTAAATCATTCTATCACTTTCTCTTTCTGGCTTTCCTTATG	0	NW_022145553.1:635758-636300	NW_022145553.1	635758	636300	LOC115926831	7440	cataaggaataacataaggaaagacaaaaagagaaagtgatagaatgataaaaacaaagaataacgtaaggaaatacagaaagagggagtgatagaatgataaaaaacaaagaataacataagagaaggtgatagaaggaagaaataaagaataacataaggaaacacagaaagaggaagtgatagaatgataaaaaaacaaagaataacataagagaaggtgatacaaaaggaagaaacaaagaataacataaggaaagacagaaagagaaagtgatagaatgattaaaaaaacaaagaataacacaagagaaggtgataaaatgaatgaatgcagaataacataaggaaacacagaaagagaaagtgatagaaggaagtgataaagaataacataag…
Scaffold1001:143685-144112	Scaffold1001	143685	144112	WHL22.3106	SPU_018887	GTCGTATCAAACAGTATCAATACGTTTAAGTAGTGATATTTCTCCATCACACATACGACAATGTCTGTCTTTGATACAGTGTGAAAAAACGTTCGATCATCTAACTTCATTTTTTTTTTTAAATATCAAGTTAGTTTAAAAAACTCCTTTTAGGAACTGTTGGTAATTGGTTTACCTGAGTCATGTTATCATTGTTTAAAATATAAGGTGACGGGAAAGCTCATTGATGACATTGTTGTCTTCTGTTCGCCGTTGGTCAAAAGAGATAATAGGGACTTTTAGATTTGCACAACGACAATGTGGATTGCTACGGTCGACGTCCTTTTAATGCACTGCCTTGAATGGACGTCACACGTATCAGTCCACTCAAATCTAAAAGTCCCTAATATTAATCCTACA…	17109	NW_022145602.1:8061151-8061578	NW_022145602.1	8061151	8061578	LOC105438006	1073	GTCGTATCAAACAGTATCAATACGTTTAAGTAGTGATATTTCTCCATCACACATACGACAATGTCTGTCTTTGATACAGTGTGAAAAAACGTTCGATCATctaacttcatttttttttttaaatatcaagttAGTTTAAAAAACTCCTTTTAGGAACTGTTGGTAATTGGTTTACCTGAGTCATGTTatcattgtttaaaatataaGGTGACGGGAAAGCTCATTGATGACATTGTTGTCTTCTGTTCGCCGTTGGTCAAAagagataatagggacttttagatttgcacaacgacaatgtggattgctacggtcgacgtccttttaatgcactgccttgaatggacgtcacacgtatcagtccactcaaatctaaaagtccctaatattaatCCTACA…
Scaffold1001:39076-39463	Scaffold1001	39076	39463	WHL22.3158	SPU_009277	CCCACACCAGTGTTAGTTACCATCATGGTTTCTTTCATCTGTAGGCTGCACACTCTTTAGCATCACCTCAGGTTTATCTCGTCCTTGTTTCTCCTTTCATAGTCATTTCTGTCACTGTTGCATAATAGTTCCATCGCGTTCCATCTAGTGTTACCATCATGGTTTCTTTCATCCGTAGCCTGCACACTCTTTACCAGCGCCTCTTGATGTTTCTTGTTCACTTTCCATCATGTCCCCGTCAAATCAGTCCGACCCGTGAGTTTCTGGAGCCTTATCTACAGTGTAGTCCCCCTCCATTGTTTTCATCGTGGTTTCTTTCATCAGTAGGCTGCACACTCTTTACTAGCACCTCTTGATGTTTCTTGTTCACTTTCCATCATGTCTCCG	0	NW_022145603.1:9623728-9623988	NW_022145603.1	9623728	9623988	LOC576519	0	CCCACATCAGTGTTACCATCATGGTTTCTTTCATCCGTAGCCTGCACACTCTTTACTAGCACCTCTGGATGTTTCTCATTCACTTTCCATCATGTATGTCTCCGTCAAATCAGTCCTACCCGTGAGTTTCTGGAGCCTTATCTAGTCCCACATCAGTGTTCCCATATCAGTGTTCCCATCATGGTTTCTTTCGTCCGTAGACTGCACACTCTTTACTAGCACCTCTTGATGTTTCTCGTTCACTTTCCATCATGTCTCCG
Scaffold1001:75821-76048	Scaffold1001	75821	76048	WHL22.3228	SPU_009275	GTTTACCATGCATCTGAAAAACAAGCAAGAAAGATAAGGCTTGTCACAGTCAAGAGTACCAGTAACATCACAGGTACATGCAAAGTTGCTGTGAGGTTTTATTTGGTTTCAGTAATAAAGAGATAGTGAGTTATCTATACATGGCCAATCAATTAAATAGGAAAGTTCAGGGCAAAAAAAACTCAATTGTAATAAAGGCTGTAGAGTGCACTTCTGAGCCTTTGTTT	0	NW_022145603.1:9652534-9652761	NW_022145603.1	9652534	9652761	LOC576376	0	GTTTACCATGCATCTGACAAACAAGCAAGAAAGATAAGGCTTGTCACTGTCAAGAGTACCAGTAACATCACAAATACATGCAAAGTTGCTGTGAGGCTTTATTTGGTTTCAGTAATAAAGAGATAGTGAGTTATCTATACATGGCCAATCAATTAAATAGGAAAGTTCAGGGCAAAAAAAGCTCAATTGTAATAAAGGCTGTAGAGTGCACTTCTGAGCCTTTGTTT
Scaffold1002:103802-103949	Scaffold1002	103802	103949	WHL22.4059	SPU_021511	CGGGGATATCCTCTTGGATGACGTCATCTTTCAAAACTTCGAGAACCATTCGAAGTTCGTCTTTCCTAAAAGCATGAAATGTTACATAATGTATTCAAAATATATTATTCTGATCGAAATGTTATTATGATACTGTTTTCATTAAAT	0	NW_022145611.1:41100597-41100744	NW_022145611.1	41100597	41100744	LOC100894116	0	CGGGGATATCCTCTTGGATGACGTCATCTTTCAAAACTTCGAGAACCATTCGAAGTTCGTCTTTCCTAAAAGCATGAAATGTTACataatgtattcaaaatatattattctgatcgaaatgttattatgatactgttttcattaaat
Scaffold1002:19848-20406	Scaffold1002	19848	20406	WHL22.3324	SPU_017816	AATAATTCCAATCAGCCCCTAAACTCACTTTCCATACAACTCTCCTAGAGAGAGATGAGCTGCCAAGACACTAGGCAGACCACTTATTCTGACTCCCTTTAACAAGGTTATGTTGCTTAATCTCTGAAGAAAGAAGAGCAACCCATTCATTAGGACATGGGTATCCTGAATGTATTTAATACACAGCTCAATTCACTCTTTACTATGTCACAGAGCACTAGAACAAAAGAATTTTGTTCATGATAGGTCTGGGTATCAACCCAACTTAAGCCAAAATCTATAAAGACGGGCTTCATAGATTCAAAGCAGATTAGTGAGATTAGGTTGTAGGTTTGCCCATACAGTAAAGCAATTAGTCACGAAGAACAAAGCCAAGTATGACCATGGATTAGGTGATAA…	0	NW_022145611.1:40945153-40945711	NW_022145611.1	40945153	40945711	LOC575375	0	AATAATTCCAATCAGCCCCTAAACTCACTTTCCATACAACTCTCCTAGAGAGAGATGAGCTGCCAAGACACTAGGCAGACCACTTATTCTGACTCCCTTTAACAAGGTTATGTTGCTTAATCTCTGAAGAAAGAAGAGCAACCCATTCATTAGGACATGGGTATCCTGAATGTATTTAATACACAGCTCAATTCACTCTTTACTATGTCACAGAGCACTAGAACAAAagaattttgttcatgatagGTCTGGGTATCAACCCAACTTAAGCCAAAATCTATAAAGACGGGCTTCATAGATTCAAAGCAGATTAGTGAGATTAGGTTGTAGGTTTGCCCATACAGTAAAGCAATTAGTCACGAAGAACAAAGCCAAGTATGACCATGGATTAGGTGATAA…
Scaffold1002:295707-295831	Scaffold1002	295707	295831	WHL22.4022	SPU_001446	TCTCATGAGCACAGAGCATGTTCCTGTCAACAGGGAGCCCTAACACAGTCACATGACATGCATGCCATGCCCTTATTACTCAGTGGTGCCCCTATAAATAGCAGCAAACAACACCATAGGAATG	0	NW_022145611.1:41284447-41284571	NW_022145611.1	41284447	41284571	LOC754879	0	TCTCATGAGCACAGAGCATGTTCCTGTCAACAGGGAGCCCTAACACAGTCACATGACATGCATGCCATGCCCTTATTACTCAGTGGTGCCCCTATAAATAGCAGCAAACAACACCATAGGAATG
Scaffold1002:313900-314292	Scaffold1002	313900	314292	WHL22.3343	SPU_001445	TAGCTATGCCATTCTTACGCCCGAAATCATAAGCGATTGTCCGTAGCGCGCCGTCTGCGTGAGGCATTTTCCTTGCCTAATTCCGCCTAGACCCGCCCTAATTCCGCCCGATGGTGGGCGCGCATCAAAAGTATAGAAAAAGGAAACATCTCGGGTACACGTTAGGCCAAATCAAATTGCTTCCCAGTAGAATTCGATCTACATGTTATTAGGTGGTCTGTCAACGACAGATCACCTATTGTTTTCGTCAGAATTTTCTTTCTTTATTATTTATTTATTTATTTATTATTTATTTTTATTTCTCCCCACTTTTTTGTGTAGACGATAACTCAAGATCCGTCCAGTCAATTTCGTTCAATTGTGGCACAGTCATAGGTCATTGTCATGACACG	0	NW_022145611.1:39056305-39056697	NW_022145611.1	39056305	39056697	LOC592762	0	TAGCTATGCCATTCTTACGCCCGAAATCATAAGCGATTGTCCGTAGCGCGCCGTCTGCGTGAGGCATTTTCCTTGCCTAATTCCGCCTAGACCCGCCCTAATTCCGCCCGATGGTGGGCGCGCATCAAAAGtatagaaaaaggaaacatcTCGGGTACACGTTAGGCCAAATCAAATTGCTTCCCAGTAGAATTCGATCTACAtgttattaggtggtctgtcaacgacagatcacctattgttttcgtcagaattttctttctttattatttatttatttatttattatttatttttatttctccccacttttttgtgtagacgataactcaagatccgtccagtcaatttcgttcaattgtggcacagtcataggtcattgtcatgacacg
Scaffold1002:46471-46654	Scaffold1002	46471	46654	WHL22.3324	SPU_017816	AACCGTAGAAAATCTACAAATCTACACCTCTCTAATGTGTGACCATAACAACATGTACATGTACACTGAATTTGCAGGTTAGTGAGCAGGAAGAGCCCTTTCCCACTTACAGACACTCTTATGTAATCAATGTCTTTCCTGTGACTGTTAGCCCATGGTTAGCCCATGCAGCGTTTTCATGTC	1258	NW_022145611.1:40971710-40971893	NW_022145611.1	40971710	40971893	LOC575375	0	AACCGTAGAAAATCTACAAATCTACACCTCTCTAATGTGTGACCAtaacaacatgtacatgtacactgaatttGCAGGTTAGTGAGCAGGAAGAGCCCTTTCCCACTTACAGACACTCTTATGTAATCAATGTCTTTCCTGTGACTGTTAGCCCATGGTTAGCCCATGCAGCGTTTTCATGTC
Scaffold1002:62193-62303	Scaffold1002	62193	62303	WHL22.4013	SPU_021511	CTCTTCGTCTGTCAGCTTCTCACCAAGGTTCGTCATCACGTGACGTAACTCTGCAGCACTGAGAAGAAAGGAAAGAGAACATTTACAATGTACATACAAACGTGGAGTTC	0	NW_022145611.1:41069231-41069341	NW_022145611.1	41069231	41069341	LOC575365	0	CTCTTCGTCTGTCAGCTTCTCACCAAGGTTCGTCATCACGTGACGTAACTCTGCAGCactgagaagaaagaaaagagaacatttacaatttacatACAAACGTGGAGTTC
Scaffold1002:63885-64104	Scaffold1002	63885	64104	WHL22.4013	SPU_021511	TGAAGAGAAAAATGTGCGCAACAGGTTAAATTTTTGCACAAAAGTAAGAAGAAATCCGATTTACCAAAAATAGACATATTGATTATTCGCACGTCATCGATTTACATATTGGTTGAATTATGGTTCACGAATTTTCTAGTACATTCGGACAAACTAAAATGTAAAGAGTTAAAACCAAAGCTATTGATCGCTTTTTTTCGACATGAAATTGGCATTTCA	0	NW_022145611.1:41070916-41071135	NW_022145611.1	41070916	41071135	LOC575365	0	tgaagagaaaaatgtgCGCAACAGGTTAAATTTTTGCACAAAAGTAAGAAGAAATCCGATTTACCAAAAATAGACATATTGATTATTCGCACGTCATCGATTTACATAATGGTTGAATTATGGTTCACGAATTTTCTAGTACATTCGGACAAACTAAAATGTAAAGAGTTAAAACCAAAGCTATTGATCGCTTTTTTTCGACATGAAATTGGCATTTCA
Scaffold1002:71464-71863	Scaffold1002	71464	71863	WHL22.4013	SPU_021511	CGCCTGGCACATTGAAATGTCATGTGAATCGGAATAAAATGTGTTCACGAGCCACCCACTGGGACATGATAGCCGCAAACTCCATATCCCCTCTTTGTTCAACCAGTATATACCTAATTGGGGATAGACCGTATTTGCATCCGACCCCCGGGTTTATTGAGCTTTAAATTCCTTCCTGATTGACAGTCATGGAAGGGAGTGTGCAGTTCAAACTAATTCTGTTTATTTATACCACTCGCAATCAGCTCTGATACCATCTTTAAAGCTGCTAATGCGTTACGAATTAACTGGGGAGTCAAGAAGTTAGGCTCTGACGTCAAAATGTCTCACCCTTGATATTTCTCAAGCATGTCTCTCTTTAGCCGCTTCTTGCTTTCTAACCTCAATACATTCACACTC	0	NW_022145611.1:41076585-41076983	NW_022145611.1	41076585	41076983	LOC575365	0	CGCCTGGCACATTGAAATGTCATGTGAATCGGAATAAAATGTGTTCACGAGCCACCCACTGGGACATGATAGCCGCAAACTCCATATCCCCTCTTTGTTCAACCAGTATATACCTAATTGGGGATAGACCGTATTTGCATCCGACCCCGGGTTTATTGAGCTTTAAATTCCTTCCTGATTGACAGTCATGGAAGGGAGTGTGCAGTTCAAACTAATTCTGTTTATTTATACCACTCGCAATCAGCTCTGATACCATCTTTAAAGCTGCTAATGCGTTACGAATTAACTGGGGAGTCAAGAAGTTAGGCTCTGACGTCAAAATGTCTCACCCTTGATATTTCTCAAGCATGTCTCTCTTTAGCCGCTTCTTGCTTTCTAACCTCAATACATTCACACTC
Scaffold1002:79844-80347	Scaffold1002	79844	80347	WHL22.4013	SPU_021511	GTGAGATATGTGATTCAGATCAGGCCTACAAATTCATCATCGTTTCATTCGTCATTATTGTTTTTCTATTTATACGAGGTTGGGAATATTTTTTCTACTTTAATAGCTCAAATGCAATTTTCCTTCTTTAGTTACGAAAAAATGAATCCTCGCTGGCGGCATTTGAGGCGGGAAAGGCAACAGATATGCATCTCTGATTGGTCCAGAGATCAACTGCAATGCGACATTACCACACCGCAATTCTATCCCACAATGCACTCGCTGACGTAGCCCTTCGTTTTGCCGCAATGCGCATAAAACCCATGCAAAGAGAGAAAACCAATGTGTCTACTCGACTGTCGTAATCCAAGAAAAAGTCAGGTAGAGACGGATGCGTGGATGCATATCGCACATGCAGCG…	1099	NW_022145611.1:41084941-41085444	NW_022145611.1	41084941	41085444	LOC575365	1061	GTGAGATATGTGATTCAGATCAGGCCTACAAATTCATCATCGTTTCATTCGTCATTATTGTTTTTCTATTTATACGAGGTTGGGAATATTTTTTCTACTTTAATAGCTCAAATGCAATTTTCCTTCTTTAGTTACGAAAAAATGAATCCTCGCTGGCGGCATTTGAGGCGGGAAAGGCAACAGATATGCATCTCTGATTGGTCCAGAGATCAACTGCAATGCGACATTACCACACCGCAATTCTATCCCACAATGCACTCGCTGACGTAGCCCTTCGTTTTGCCGCAATGCGCATAAAACCCATGCAAAGAGAGAAAACCAATGTGTCTACTCGACTGTCGTAATCCAAGAAAAAGTCAGGTAGAGACGGATGCGTGGATGCATATCGCACATGCAGCG…
Scaffold1002:81001-81250	Scaffold1002	81001	81250	WHL22.4013	SPU_021511	ATTTTTTAAAAATTATTATGTAAGAAGCCCTTTGCTTCACTTGAGTGAAATGTGAATACATAATATATGTGTGTGTGCGCATGTGTGCGCGTGTGCGCTAATGTGTGCGTGCGTGCGTGTGTGTGTGTGTGTTGTGTGTGTGTGTGTGTGTGTGTGGGTGTGTGTAAGACTACAGCGCTTACGAAAACTTATTTCAATGTTCCTGTGCAATGTGTTTTTTAAAACATTTGTAACACAACCAGAAAGGTC	2256	NW_022145611.1:41086100-41086337	NW_022145611.1	41086100	41086337	LOC575365	2220	attttttaaaaattattatgtaAGAAGCCCTTTGCTTCACTTGAGTGAAATGtgaatacataatatatgtgcgtgtgcgcatgtgtgtgcgtgtgcgctcgtttgtgcgtgcgtgtgtgtgtgtgttgtgtgtccgtgtgtgtgggtgtgtgtaggACTACAGCGCTTACGAAAACTTATTTCAATGTTCCTGTGCaatgtgttttttaaaacatttgtaaCACAACCAGAAAGGTC
Scaffold1002:98397-98518	Scaffold1002	98397	98518	WHL22.4052	SPU_017815	ATGAAACCACAACAAACTGAAGTATTGATATAAATGAACTCAATCGATGAACAGGCTCTGTCCTACCAACATCGATGGATTAAAGTAAGTAAGTGAGTTAGTAAGTAAAGTAAGTAAGTCA	0	NW_022145611.1:38777079-38777200	NW_022145611.1	38777079	38777200	LOC575504	0	ATGAAACCACAACAAACTGAAGTATTGATATAAATGAACTCAATCGATGAACAGGCTCTGTCCTACCAACATCGATGGATTAAAGTAAGTAAGTGAGTTAGTAAGTAAAGTAAGTAAGTCA
Scaffold1003:23973-24363	Scaffold1003	23973	24363	WHL22.3534	SPU_012451	TGATCAGTCACACGTTTTCTTAGCGTTGCCTGGTGTCTTGCGATCACTGGACCGAAGATAGGTGACATATCCATAGTCCCTGTTTAGTGTATAGGCTTAATCCTCTTAATCCATATTGACTCTTTCAACCAGAAGTTGCTTTCAAAGTCGATAATAAGGGCATCATACCATCCAACATAATATCGTGTGTTGAGGGCGTGTTTAGCTAAAGCTGAACGGGATGGGTTACTCAATCTGAGGGCTCTTTTGCGTTCATTTGATCGCTCATTAAAAGCTCTGCCCGTTTCCCTAACATGAGAGTTGTTACAATATGTGCCAGTAATCTTGTACACAATGCCTGACTTTTACTCTCTTGGAATTTGGTCTTTTGGATGGACCAACCTACTTCTT	2250	NW_022145596.1:9527754-9528144	NW_022145596.1	9527754	9528144	LOC584025	2341	TGATCAGTCACACGTTTTCTTAGCGTTGCCTGGTGTCTTGCGATCACTGGACCGAAGATAGGTGACATATCCATAGTCCCTGTTTAGTGTATAGGCTTAATCCTCTTAATCCATATTGACTCTTTCAACCAGAAGTTGCTTTCAAAGTCGATAATAAGGGCATCGTACCATCCAACATAATATCTTGTGTTGAGGGCGTGTTTAGCTAAAGCTGAACGGGATGGGTTACTCAATCTGAGGGCTCTTTTGCGTTCATTTGATCGCTCATTAAAAGCTCTGCCCGTTTCCCTAACATGAGAGTTGTTACAATATGTGCCAGTAATCTTGTACACAATGCCTGACTTTTACTCTCTTGGAATTTGGTCTTTTGGATGGACCAACCTACTTCTT
Scaffold1003:27632-27889	Scaffold1003	27632	27889	WHL22.3534	SPU_012451	GACACCTCCCTGATATAAGCTTACTAGCTTGGTTTTTACTTGCACTGGACTTAGCATATTTTACTGTAAATTAACGAGTGCTTTGTCCACACACCATTCCTGTAATTCATGACACTCCTTGTAGTTAATCGCCTCACCTACCATCCCAGTATAGCTTCCTAAGTGAGCTGCCAAAGGGATTACCCAACCAAGTACCAAGTACCAAGGGACAAAATATGTGTTCACATAAATTACAAGGAAATACAAAAGTTGGTCAG	0	NW_022145596.1:9531546-9531803	NW_022145596.1	9531546	9531803	LOC584025	0	GACACCTCCCTGATATAAGCTTACtagcttggtttttacttgcactggacttagcatattttactgtaaattaacgagtgctttgtccacacaccattcctgtaattcatgacactccttgtagttaatcgcctcacctaccatcccagtatagcttcctaagtgagctgccaaagggattacccaaccaagtaccaagtaccaagGGACAAAATATGTGTTCACATAAATTACAAGGAAATACAAAAGTTGGTCAG
Scaffold1003:320528-320643	Scaffold1003	320528	320643	WHL22.3534	SPU_012451	CGCCGAACTGTTCAAGTTACATCACAATGTCTCGTATCCGGTTGACTATGTGCGTCGTGTTGCCAGGGAACTCGGTATCGTAAAGCGCAAACGGGGAAGAAGGGCTGGTAGTCAC	270055	NW_022145594.1:33329164-33329279	NW_022145594.1	33329164	33329279	LOC576594	0	GTGACTACCAGCCCTTCTTCCCCGTTTGCGCTTTACGATACCGAGTTCCCTGGCAACACGACGCACATTCTCAACCGGATACGAGACATTGTGACGTAACTTGAACAGTTCGGCG
Scaffold1003:35062-35376	Scaffold1003	35062	35376	WHL22.3534	SPU_012451	GTCTGTGATCTGCCTGCAATAAACCATGGACCTTGTTCATGCATAAACCATTATATTTGCTTGACAACGATCATGCCTCTCCATCATGGCTGAAAATTTCCTTTCAGAAAATGTTTACCGAGTCAACAGTGGTGACGTACAGTATCTTGTCAATGACTTGATGCCCTTTCCCTTATACAATTTGGCATAAATCGATGTTCTGCCTTTTTCAAGTCTATAGAAGTTTTCCCCTCGTCAAACACCCAAAGATTAGATAAAATCTAAGCTTTTGGAGTGTTGGTACGCCACCCTGCCCGCCTCAAATCAATGGGGCA	0	NW_022145596.1:9539789-9540103	NW_022145596.1	9539789	9540103	LOC584025	0	GTCTGTGATCTGCCTGCAATAAACCATGGACCTTGTTCATGCATAAACCATTATATTTGCTTGACAACGATCATGCCACTCCATCATGGCTGAAAATTTCCTTTCAGAAAATGTTTACCGAGTCAACAGTGGTGACGTACAGTATCTTGTCAATGACTTGATGCCCTTTCCCTTATACAATTTGGCATAAATCGCTGTTCTGCCTTTTTCAAGTCTATAGAAGTTTTCCCCTCGTCAAACACCCAAAGATTAGATAAAATCTAAGCTTTTGGAGTGTTGGTACGCCACCCTGCCCGCCTCAAATCAGTGAGGCA
Scaffold1003:72583-72840	Scaffold1003	72583	72840	WHL22.3534	SPU_012451	TACAACCTCGCAATCTTATAATACTGCTTGTTGTTGTTGACAATAGAGAGCTGACCTTTGGATTTTCCTTTCATGTGCAGTGAAGTGCATTGTTCCGCGCGTGCCGCGTGCCGTTATAGGCTTTGGCTTTGCGCTGCTCCCAATTGAAATACCAGCAGTATTGGTATTCTGTGCATGGAAGGTCTCAGCGAAAGTCAATATCTGTGGGACAGACATCGCGGAGCTCCAATACGCTGCTGTACGAATTTCATGTGAGA	22110	NW_022145601.1:2811639-2811907	NW_022145601.1	2811639	2811907	LOC115924806	6979	TACAACCTCGCAATCTTGCTTTAGACTTATAATActgcttgttgttgttgacaataGAGAGCTGACCGTTGGATTTTCCTTCCATGTGCAGTGAAGTGCAGTGTTCCGCGGGTGCCGCGTGCCGTTATAGGCTTTGGCTTTGCGCTGCTCCCAATTGAAATACCAGCAGTATTGGTATTCTGTGCATGGAAGGTCTCAAAGAAAGTCAATATCTGTGGGACAGACATCGCGGAGCTCCAATACGCTGCTGTACGAATTTCATGTGAGA
Scaffold1004:125210-125694	Scaffold1004	125210	125694	WHL22.3811	SPU_002268	TGAACAAAATGGTTTACAAACTTTCTAAAATGCCTAGAACTCATACAAATGTCCTGATTATTCAGAGCATTTGTTGACATGTCTATGCTCTGCTCTCTCCAGCTTGCTCCACTGATTTGAGAATCCAAATCAAGGCTGACTTTTAAGGATTCCTGTTCAAGTTCACTCGACCATGCCAGGGACCTGCGTTCCCACCCTTTTGTTGCCAAACTGGGTTGCCATGACATCATAGTAAGCTATCTCCATATCTGTAGGTCCTCCATAATAAGGGAAATGAGCCATCTTTTGAAGTACAGTCAACTGACTTCAAAAGAGGTGAGATCTCTAGAGAAGATAAGAAGTGTTTTGTTTGACTGGTGGCTTAAATTGAGTTTGTCCTCGTGTATATACCTGTTGCTG…	0	NW_022145613.1:22096210-22096694	NW_022145613.1	22096210	22096694	LOC584771	0	tcacaaaaatcaatatttgcTGGTTGGATTCTACAACATATGAAACGCTCTGGCTAATAAATAGCAGACAAGTATGGAAGTCCCTCAGCAACAGGTATATACACGAGGACAAACTCAATTTAAGCCACCAGTCAAACAAAACACTTCTTATCTTCTCTAGAGATCTCACCTCTTTTGAAGTCAGTTGACTGTACTTCAAAAGATGGCTCATTTCCCTTATTATGGAGGACCTACAGATATGGAGATAGCTTACTATGATGTCATGGCAACCCAGTTTGGCAACAAAAGGGTGGGAACGCAGGTCCCTGGCATGGTCGAGTGAACTTGAACAGGAATCCTTAAAAGTCAGCCTTGATTTGGATTCTCAAATCAGTGGAGCAAGCTGGAGAGAGCAGAGCA…
Scaffold1004:185324-185618	Scaffold1004	185324	185618	WHL22.3956	SPU_002270	ACAGGTCGTGTAACTACCAGCACATTTTAATCAAAACATTGCATAGTTATTGATATGCTTAAAATACATTAAGCTGGAACAATGGACATATTGGTGGTTGTATTCCAAGGTGGCTGAAATCTAAGACATGAAGGAACATGATTATAGGGGGTTATATATAGCTACGGAGTTATTTCTACATGTGCTTAAGAAGGCATTTGAATGAATTGGGTGTTTTTGAGAATCGTATGTGGTCGGGTAGTTGGCATACAGAAACGATTTTTGATAAAAAGCCGTTCGACAGTTTGGTGGTCT	4139	NW_022145605.1:21712995-21713291	NW_022145605.1	21712995	21713291	LOC100891219	0	AGACCACAAAACTGTCGAACGGCTTTTTATCAAAAATCGTTTCTGTATGCCAACTATACCCGACCACATACGATTCTCAAAAACACCCAATTCATTCAAATGCCTTCTTAAGCACATGTAGAAATAACTCCGTAGCTATATATAACCCCCTTTAATCATGTTCCTTCATGTCTTGGATTTCAGCCACCTTGGAATACAACCACCAATATGTCCATTGTTCCAGCTTAATGTATTTTAAGCATATCAATAACTATGCAATGTTTTGATTAAAATGTGCTGGTAGTTACACGACCTGT
Scaffold1004:212896-213230	Scaffold1004	212896	213230	WHL22.6662	SPU_026983	CCTCCCTGCATGACCATGACCACTGACAGGTGGTTATTTCATCAAATCAGCTCTTAATTAACATTAGAAAAGGACCATCGATTAGGCATTGTTTGCTATATAGAGGGCACAAGTAGCTTTAAGTAGTGCAGTGGGGCTTTTAAAGGAAAATTTATCATGAAAACCCTGTAAAATTAGAGAAATGACATTTATAGTGTTTGGATTTTAGGATTAACCTTTCACATATAAAGGTTACTTCTCCTTTCAATGAAATTGTTTCAATCCTATAAAAATTCTAATTATCTTCATGGATGTCAGAATTATTGACAAACATGGAATTCAAATGGAGAACAGG	0	NW_022145613.1:22227565-22227899	NW_022145613.1	22227565	22227899	LOC115919865	0	cctccctgcatgacCATGaccactgacaggtggttatttcatcaaatcagctcttaattaacattagaaaaggaccatcgattaggcattgtttgctatatagagggcacaagtagctttaagtagtgcagtggggcttttaaaggaaaatttaTCATGAAAACCCTGTAAAATTAGAgaaatgacatttatagtgTTTGGATTTTAGGATTAACCTTTCACATATAAAGGTTACTTCTCCTTTCAATGAAATTGTTTCAATCCTATAAAAATTCTAATTATCTTCATGGATGTCAGAATTATTGACAAACATGGAATTCAAATGGAGAACAGG
Scaffold1004:227783-228100	Scaffold1004	227783	228100	WHL22.6663	SPU_026982	CCCCAAACCATTGAGTTGTTTCATAACTTTGTCTGCTTGTGACAGTGAATTAATTGGACTACCGGTAGTATTGTTGTTTGGGTATACATCATGTACATATAGTGTGAATATTATCAAAGAATACTCATTGACTCCTTGTATCTACATTGTAAATCTACTAGCATGTATCTCCAATGAAAAATCAATGTCCGGTTTCTCAGATACTACATGTAGGTAAATTCAGTAAGAACTAGGTAAATCCAGTTAGAACCGGATGAGGATGGTTGACTTCAGTGTATACATCTGAATTTACTCTTCCCATACAAGCTAATAATGCC	0	NW_022145613.1:22242391-22242708	NW_022145613.1	22242391	22242708	LOC115919865	0	CCCCAAACCATTGAGTTGTTTCATAACTTTGTCTGCTTGTGACAGTGAATTAATTGGACTACCGGTAGTATTGTTGTTTGGGTATACATCATGTACATATAGTGTGAATATTATCAAAGAATACTCATTGACTCCTTGTATCTACATTGTAAATCTACTAGCATGTATCTCCAATGAAAAATCAATGTCCGGTTTCTCAGatactacatgtaggtaaatTCAGTAAGAACTAGGTAAATCCAGTTAGAACCGGATGAGGATGGTTGACTTCAGTGTATACATCTGAATTTACTCTTCCCATACAAGCTAATAATGCC
Scaffold1004:29522-29915	Scaffold1004	29522	29915	WHL22.3811	SPU_002268	TGACAAAATTTAACATTACTGTATGCTGTAAATCCGGTTAATAGCAGTAGCATGTTAACAGCATCTCATGATCTTATCAATCTCATCGTAACTGTGGATTGGAGCTCAATACATATACATGACCTATTATTATGCAAAGGTTAGCATTGCAAGAGAATGAGCAACTTTGTGTTGACTAGTACCAAACATTTCCAGTTCATTGGGTCGGCACAAATCATCGGCTAGCGTTTGATTGTACGCCATTGTCCTCTATTCTTTTGAACTGTCGAGACGACACCGTTATTACCATTGTTACCCATTCAATCACTGATCGCCCGCAAAAAGGAGTTATTCAGGTCTAAATAAGCCACATTTGGTACTGTGTACATACGTAGCATACCAATAACATTTAGC	95278	N/A	N/A	N/A	N/A	N/A	N/A	N/A
Scaffold1005:181407-181704	Scaffold1005	181407	181704	WHL22.4232	N/A	CAGCCTCATAACATCTATTTATACTTTATTAAAGTGAAGAGGTGGAGATAAAGTTAGAAAATGAATGTCAAATGGCGAGGTGAAGAGAGAAAAAAGGAGGGAGAAAAAGAGGAGGGAGGGAGGGAGGGAAGGAAATGATATTCCACTTCTCGCTGCCGAAATATGAAGTGCTGGTTACCCATTTCATGTTTAGCCCCAGGCTACCCCGACTTGTACGCCTGTGACATTTGTACTGATATCATACATAAAATTATTAATGTTGTAGGGTGTAAAATTGGAACAAACTGATGTTTGATA	0	NW_022145612.1:41843610-41843907	NW_022145612.1	41843610	41843907	LOC105437659	0	TATCAAACATCAGTTTGTTCCAATTTTACACCCTACAACATTAATAATTTTATGTATGATATCAGTACAAATGTCACAGGCGTACAAGTCGGGGTAGCCTGGGGCTAAACATGAAATGGGTAACCAGCACTTCATATTTCGGCAGCGAGAAGTGGAATATCatttccttccctccctccctccctcctctttttctccctccttttttctctcttcaccTCGCCATTTGACATTCATTTTCTAACTTTATCTCCACCTCTTCACTTTAATAAAGTATAAATAGATGTTATGAGGCTG
Scaffold1005:31775-31899	Scaffold1005	31775	31899	WHL22.3998	N/A	TCACAATTTTATTATTCATTCGACCATTGATTGCACTGACAAAAGAGTTATTAGACCAAAGTTAGAAATATTATTACAGAATGACGGTTTTGAGAAGGCCAATAAATGACCTTATGGTGTGTGG	0	NW_022145602.1:824604-824728	NW_022145602.1	824604	824728	SpZ12-1	9967	tcacaattttattattcattcgACCATTGATTGCACTGACAAAAGAGTTATTAGACCAAAGttagaaatattattacagaaTGACGGTTTTGAGAAGGCCAATAAATGACCTTATGGTGTGTGG
Scaffold1006:44997-45149	Scaffold1006	44997	45149	SPU_008752	N/A	GACCTAATGCATATCATTTAATAAATTCATAAGAGAAAATAGTAAAGAAAGAAAAAAAAAAGAACGAAAGGGTACGTTTAAAGATTCTTCCTCCACATACAAATCCACTCGATCTCTAGTGATCTCTTTTGATCTCTCTCTATATCTCTCTC	3606	NW_022145612.1:38895521-38895673	NW_022145612.1	38895521	38895673	LOC115929893	0	GACCTAATGCATATCATTTAATAAATTCATAAGAGAAAatagtaaagaaagaaaaaaaaaagaacgaaaGGGTACGTTTAAAGATTCTTCCTCCACATACAAATCCACTCGATCTCTAGTGATCTCTTTtgatctctctctatatctctctc
Scaffold1006:73953-74071	Scaffold1006	73953	74071	WHL22.4160	SPU_014095	ATGGCCTATGGTAGTCTTATAGTGCAGACTCACTTTTACGACTGACCAGGGTTTGTGCTTGCAGACTAGACCTACAGAGTGGGTCTAAACTCCAAACTGTTGCTTGGGTATAATGCTT	2623	NW_022145612.1:38922243-38922361	NW_022145612.1	38922243	38922361	LOC593778	3233	atggcctatggtagtcttatagtgcagactcacttttacgactgacacgggtttgtgcttgcagactagacCTACAGAGTGGGTCTAAACTCCAAACTGTTGCTTGGGTATAATGCTT
Scaffold1006:93664-94621	Scaffold1006	93664	94621	WHL22.4352	SPU_028242	ATGACATAATCAACGCACGCGTGCATGATTTTGTAATTGCTAAAATTCAACTAAATTTCACTTTCCTTTTTGACAGGCACTATTACTAAACTAGTTTGAGTAATCACGATTCTACGAAAAGCGGAATTGGGAATTGATACTTCAGTCGTTTCAGCTAAAACTCGTCATTGTCTGCAACATCCGTAGGATCTGCTTTCAAAACCTTCCTTTCTTCTTTATCCGCCATTATTCATTGAATGCACTCGAATAACTATTACAATATGGAATGTTTTCTCAGAGTTCGTCACACATTGTGAAAACGCCTACGCGTGTATCGACTCTAGCTTTTAACCTGTGAAATATTCGGTGCATGAGTATGACAAGCGATGACATGCAAAACACATTGTTTTCAACAGAATG…	0	NW_022145612.1:39112397-39113354	NW_022145612.1	39112397	39113354	LOC100889589	0	CACCCCAGCTAGTCGTCACGTCTACCCGAGCTCCCCGGTTGAGCAGCCAACGTACCACGCCGGTGTAACCCCGTACACTGGCGACGAAAAGAGGTGTTTCGTGGCTCTGAGGGGCCTGGTAGTTGACCAGCTTACGACAAATGGGAGAAAATGTCAGGAGACGCTGGATTTCACCAACATCGTTCGCCTGCACGGCTAGCAGAAGCGAATTCATCGTCGTAGTCGAAAATCGTCTGCGATGAGCATCAATTTGCACGTACGATGGCTGGCTTGGGAGATCGTTCTAATCGCGATTTCAGAAAATGACAACAGAGTTTGTCGTCTGCTGTGTTTAGTCACGTGATCTTCTTACAGCTGCGCAGTCGTCGTTTCTTGTTCCAGAGCCTGCATGTATAGAAC…
Scaffold1007:130308-130463	Scaffold1007	130308	130463	WHL22.4522	SPU_025107	CTGGAACAGAAAGGGAAAAATTCCACTTTATAGTTTTTAAAAAGATCATGATCTATTCTTTTAACTGTAAAATAACTTGCTATCATATATTCCTATCATCTTTTCTAATATACTCTTTGCATATACATTAGTTCATTTATATATTCACATTTACG	0	NW_022145614.1:30012459-30012614	NW_022145614.1	30012459	30012614	LOC591616	0	cgtAAATGTGAATATATAAATGAACTAATGTATATGCAAAGAGTATATTAGAAAAGATGATAGGAATATATGATAGCAAGTTATTTTACAGTTAAAAGAATAGATCATGatctttttaaaaactataAAGTGGAATTTTTCCCTTTCTGTTCCAG
Scaffold1007:76452-76855	Scaffold1007	76452	76855	WHL22.4470	SPU_012165	CCAGGCTGCCGCCTATATTACTTTTGCTTGAAACAATATTTCTTGAATACATTCGAACGATTTGCTATTCCCGTTTGGAAATTATGTATCATAAATGCATATTCTGACATTTTCATGGTTCCGGCTACCATGGAATGGCCTTATAGACGCTATTCGAAATATTTGAAATTTACCGGGAGCACCAGTAAATTTTTGATTATTCAATATCTCGAAAGCAGAAGTGTTTTAGGGGTTAAATTTTCTTGTGCTTATAATACATCCACAGGGGCATCCAAATATATCAAAATTGTAAAGAATTACTATCCATCCAATTTTCAAAATTTACCAAAACTTTGCTTTATCTGTAATTTTTTTCTTTTACAATTCAGGCCTTCCCAGGCTGCCGCCTTCAACATCGTA…	0	NW_022145554.1:1608555-1608862	NW_022145554.1	1608555	1608862	LOC754412	0	aaacaatatttcttgactacaTTCGaacgatttgctattcccgtttggaaattatgtatcataaatgcatattctgacattttcatGGTTCCGGCTACCATGGAATGACCTTAGACGCTATtcgaaatatttgaaatttaccgggagcaccagtaaatttttgattattcaatatctcgaaagcagaagtgttttaggggttaaattttcttgtgcttataatacatccttaggggcatccaaatatatcaaaattgtaaagaattactatccatccaattttcaaaatttaccaaaactttgcatt
Scaffold1007:76864-77336	Scaffold1007	76864	77336	WHL22.4470	SPU_012165	CCTCTAGCAATGGAAACAAAACCCACCTCCACCGTTTCTAATACATCATCATCTGCATCCGGTGATTGCCTTGGATCGCATCCAACGATAGCCAACCAATCTGCAGAGAAACGGTCGCCTCTAGGAACGTCCATACCGGACAACTCCGTGGTAGAGGAACCTATGGAAGCGAAACCGTCCGATCCTTTTGCTGGACTCCTTAAGGACATGAAGCAGAGCCTGTCCAAAAGCAGATCATCGAGCATCAACTCTACTGGAAAGGACAGTTCCTCGATGGAAGGCCCCGCGCAGGGCAGCGTGAACGGAGCTGATAACAGGACGCTTGAATCCAGAGAAGCTGAAGGGAAGAGCCAGGAGGCGTCACAAAACCCTGAAGTGAACAATGAAATGAACGATGAT…	0	NW_022145554.1:1608936-1609408	NW_022145554.1	1608936	1609408	LOC754412	0	CCTCTAGCAATGGAAACAAAACCCACCTCCACCGTTTTTAATACATCATCATCTGCATCCGGTGATTGCCTTGGATCGCATCCAACGATAGCCAACCAATCTGCAGAGAAACGGTCGCCTCTAGGAACGTCCATACCGGACAACTCCGTGGTAGAGGAACCTATGGAAGCGAAACCGTCCGATCCTTTTGCTGGACTCCTTAAGGACATGAAGCAGAGCCTGTCCAAAAGCAGATCATCGAGCATCAACTCTACTGGAAAGGACAGTTCCTCGATGGAAGGCCCCGTGCAGGGCAGCGTGAACGGAGCTGATAACAGGACGCTTGATTCCAGAGAAGCTGAAGGGAAGAGCCAGGAGGCGTCACAAAACCCTGAAGTGAACAATGAAATgaacgatgat…
Scaffold1007:78641-78982	Scaffold1007	78641	78982	WHL22.4470	SPU_012165	TGATGAGAAAGCCACCTGTCGGGGACCTGGCTGGGCGGTCTAATCCCTTCTGGCCCAGTAGTATTGACGGTCTTTAACGTAATTATGCTGCAAGGAAATTGGTGAAAATAATTAAAAACGGATGCAAAAAGAAGACCAGTACAAAGCCGAATTGAAATATCTATTTTTTCTTCTTCTATATGTGTAAGTACGTACTTCGATGTAGGACTGAGAATTTTTATATTGCCATTGTTGAAATAAACAAGGTAATAATTTCTGCTGCATTTCTAAAATCTTTGTAAACTTATTCAGAAAGGTTTGCCAGTCATTATAACATGAGATAATTATTCCCTTCTTAACTG	1294	NW_022145600.1:2830148-2830489	NW_022145600.1	2830148	2830489	LOC589113	0	CAGTTAAGAAGGGAATAATTATCTCATGTTATAATGACTGGCAAACCTTTCTGAATAAGTTTACAAAGATTTTAGAAATGCAGCAGAAATTATTACCTTGTTTATTTCAACAATGGCAATATAAAAATTCTCAGTCCTACATCGAAGTACGTACTTACAcatatagaagaagaaaaaatagatatTTCAATTCGGCTTTGTACTGGTCTTCTTTTTGCATccgtttttaattattttcaccAATTTCCTTGCAGCATAATTAcgttaaagaccgtcaatactactgggccagaagggattagaccgcccagcCAGGTCCCCGACAGGTGgctttctcatca
Scaffold1007:86055-86517	Scaffold1007	86055	86517	WHL22.4470	SPU_012165	CCCCCCCCCCTCCCCTCCCATTCGCAGGCATGGATTTTACATGCGTAATGCGTCGTACAAATGAATTTTATATAGGTTAATCAGAACAGTAAAATCAACAAGGATTTCCCCCCCCCTTTTTTTCTTCAATTATTGTAATTTATTCCCACTTTTTATAATGCAAAAAACGTATGGTTGTGGTAGTACCACTTCAAAAGGTAGAATAACTCAATATGCTTCGCTAGATCAAGTTATAAAGAATAATCAGTTCAATGTTTATACTTTTAAAGAGGATTCAAAATGAAATTGTAACCCACAACTTGGGGTTCGAGACATCTAAGTTTGATATCGTTGAACATTGTAATAACATGAAATCTAGTAAATGTTTTACTGAGGGTAAGGGTAAGAACTGCTTATTTG…	8708	NW_022145554.1:1616522-1616983	NW_022145554.1	1616522	1616983	LOC574555	0	cccccccccctcccctcccattcGCAGGCATGGATTTTACATGCGTAATGCGTCGTacaaatgaattttatataggttAATCAGAACAGTAAAATCAACAAGgatttcccccccccttttttcttcaattattgtCATTTATTCCCACTTTTTATAATGCAAAAAACGTATGGTTGTGGTAGTACCACTTCAAAAGGTAGAATAACTCAATATGCTTCGCTAGATCAAGTTATAAAGAATAATCAGTTCAATGTTTATACTTTTAAAGAGgattcaaaatgaaattgtaaccCACAACTTGGGGTTCGAGACATCTAAGTTTGATATCGTTGAACATTGTAATAACATGAAATCTAGTAAATGTTTTACTGAGGGTAAGGGTAAGAACTGCTTATTTGT…
Scaffold1007:88536-88922	Scaffold1007	88536	88922	WHL22.4470	SPU_012165	CACGAATATGATGAAGGCACACAACCTTACAGTTCACACTTCCCGAAATTAAATAGAAGACAAATCTAATTGCGATTCAGTCCTCAAATAAAATGATGATGATGAAACTCGCTAATTAACGTGAAAACTAATGAGAAAACGCTTGTTGAATAATCCGAAAACGTCCTATAAAAAACACGTCCGATTGATGAAACTGAAAACAAGAGAAGTGAGTAAAATCCGTGTGTGGAGACTTTTCCAAGTGCGCTAAAAGTGTGATGATTGGCTTATTAAAACAATAAGGTGCGGTCCGATTGGAGTAACTAAAATAACACTCTTGTTGCTGGGTGGTTCCATGGATGAAATAAACTCAGAGAATGTGTAGAATGTGCAGCTGTAAATTGTTA	11189	NW_022145613.1:10329780-10330166	NW_022145613.1	10329780	10330166	LOC762446	0	CACGAATATGATGAAGGCACACAACCTTACAGTTCACACTTCCCGAAATTAAATAGAAGACAAATCTAATTGCGATTCAGTcctcaaataaaatgatgatgatgaaactcgCTAATTAACGTGAAAACTAATGAGAAAACGCTTGTTGAATAATCCGAAAACGTCCTATAAAAAACACGTCCGATTGATGAAACTGAAAACAAGAGAAGTGAGTAAAATCCGTGTGTGGAGACTTTTCCAAGTGCGCTAAAAGTGTGATGATTGgcttattaaaacaataagGTGCGGTCCGATTGGAGTAACTAAAATAACACTCTTGTTGCTGGGTGGTTCCATGGATGAAATAAACTCAGAGAATGTGTAGAATGTGCAGctgtaaattgtta
Scaffold1008:110582-110783	Scaffold1008	110582	110783	WHL22.4850	SPU_027234	ACTCTAAGACATAGAGCGATGATTTTCATCAAAAACCTCAATAAGACCGCTATTCCCCCACTTCACCTCCCCCTTCCTATAAAGTGAGCCGATACTAAGTCCCTTTTAATAACCCCCAATAAAACGCCCCTTAACTCTTCACCGTACTCTCTTTCAGCATAGACGTCTATGCTTTCAGCCGCCCAAGTTTATGACTTTCGC	7699	NW_022145607.1:33405398-33405599	NW_022145607.1	33405398	33405599	LOC578269	7966	GCGAAAGTCATAAACTTGGGCGGCTGAAAGCATAGACGTCTATGCTGAAAGAGAGTACGGTGAAGAGTTAAGGGGCGTTTTATTGGGGGTTATTAAAAGGGACTTAGTATCGGCTCACTTTATAGGAAGGGGGAGGTGAAGTGGGGGAATAGCGGTCTTATTGAGGTTTTTGATGAAAATCATCGCTCTATGTCTTAGAGT
Scaffold1008:142840-143102	Scaffold1008	142840	143102	WHL22.4850	SPU_027234	GAAAGCACATGAAAAGATTCTCTACTTGATGGGTCAAACTGGTGGTCAGTGATTACTTATCTCGTTACCCTCTCTGTCCGAATGCCTTCCTTTGCATCTCCTACTCAGGAAGTCCACAAGAGACCAATTTAGGAGGAAATTAAAACAAAATGGGAGCACTTCCTTGTCTTGTTAGGATGAATATAGAGGGCTGTGCTAACAACGAGGTGATGCGTGGGAAACCAGTTTATCGCTTTCCAATGATATAATTAATGACATACTG	0	NW_022145607.1:33373677-33373939	NW_022145607.1	33373677	33373939	LOC578269	6849	CAGTATGTCATTAATTATGTCATTGGCAAGCCCTAAACTGGTTTCCCACGCATCAGCTCGTCGTTAGCACAGCCCTCTATATGCATCCTAACAAGACAAGGAAGTGCtcccattttgttttaatttcctcCTAAATTGGTCTCTTGTGGACTTCCTGAGTAGGAGATGCAAAGGAAGGCATTCGGACAGAGAGGGTAACGAGATAAGTAATCACTGACCACCAGTTTGACCCATCAAGTAGAGAATCTTTTCATGTGCTTTC
Scaffold1008:17005-17131	Scaffold1008	17005	17131	WHL22.5073	SPU_027235	CCCTGACGTACATACACACACCCCCGCCTACACGACCAATTCTATGTTTTTGAATAAGTTTGTAATTAGGCAAATTATAAAATGAATGTGGGTCTCCCTTAAACCAGGTTTCCGTAAATGCGTATA	50412	NW_022145615.1:22749810-22749936	NW_022145615.1	22749810	22749936	LOC582390	2678	TATACGCATTTACTGAAACCTGGTTTAAGGGAGACCCACATTCATTTTATAGTTTGCCTAATTACAaacttattcaaaaacatagaaTTGGTCGTGTAGGCAGGGGTGTGTGTATGTACGTCAGGG
Scaffold1008:194379-194664	Scaffold1008	194379	194664	WHL22.4850	SPU_027234	TAAGGTATGGCCCGGTGTAGGCTTACAGCCAAACTCCTACTCTCGACCTTCTCGCCAAGTTTGGAGATTATTTTCCTTCTCTCTAGTTTTATAGAGGCTGCTGGGTGCCTTCGTATTTGTCGGCCATGATACCGGGGTGAAAAGGGTTCAGCTTTGATAGTGAAATAGCGGATTGCGTAATAATTTAGATGTGCATATGTATTACTAGAAGTGCATAATTAATAATTTCAGGCTCTCTTATTTAGCTTTTAAGGGCTGCCCCTCAAAGTGATCTATTTCCTGATT	13932	NW_022145607.1:33339021-33339306	NW_022145607.1	33339021	33339306	LOC578269	41482	AATCAGGAAATAGATCACTTTGAGGGGCAGCCCTTAAAAGCTAAATAAGAGAGCCTGAAATTATTAATTATGCACTTCTAGTAATACATATGCACATCTAAATTATTACGCAATCCGCTATTTCACTATCAAAGCTGAACCCTTTTCACCCCGGTATCATGGCCGACAAATACGAAGGCACCCAGCAGCCTCTATAAAactagagagaaggaaaataatcTCCAAACTTGGTGGGAAGGTCGAGAGTAGGAGTTTGGCTGTAAGCCTACACCGGGCCATACCTTA
Scaffold1008:77195-77905	Scaffold1008	77195	77905	WHL22.5073	SPU_027235	CCTTCAATATCTCTATAGATGAACTATCATTATACATTGTCTTCGTGACATACTTTGACATTCCCTTATCCAACATACATAACCATATGCATCATGATATAATCTCGAACATTCACGACGACAATTTCCGGCTTTCCTACTTTCCAACACACCAATAATACCCTCATCTTTCGCCCTTCACTTTATTTACAAGCTATCACACTTCCTGACTTATTCTATACCATCTTAAAGATGTACCGCTATTCAAATCCGCCACTTTCTTAAGAATTCACCAAAGTGTTTTGACAAGTCCATTCTAACGATTCACTTAACCCGTCTAGCCGACACTTACAGGGCGGTTATCAAAGCTAATGCCTTTAAGGGTGCTTTGTCCTGGTAAAGGTAACAATTGAGGACCGG…	0	NW_022145607.1:33437411-33438121	NW_022145607.1	33437411	33438121	blimp1/kroxD	0	GTAACGTAAATGGCGTCACTTTCGCATATTCCCACTTCCTGTTTCCATTTCAAAAAGCCCCCTCTTTTATTGTTTtgtcccccctcctcccactcCATAGAAGATCCTCCCCTTTCGTTTTTCTCCCcatcttctctttttcctttcttcgtGCTCGATAATTCCCGCATCCCGaacttttcatttcaataaaatcaaAGAGGGGCGCACGCTTTCAGTCTACGACTCATAGGGGTGGGCGGGTCTATTGTGGCGGGGTCATACAAAGAGATAAAGGGGGTACTCCTAGTATTATAGGGGCGGGTAATGACCCGGTCCTCAATTGTTACCTTTACCAGGACAAAGCACCCTTAAAGGCATTAGCTTTGATAACCGCCCTGTAAGTGTCGGCTAGACGGG…
Scaffold1008:84091-84252	Scaffold1008	84091	84252	WHL22.5073	SPU_027235	CGCCCCTGATCATGAACAGTTAAATGATGTGGCCGAATACTAACGAGGCCTATGACCTATTGTGCACGAGAAAGGAAACTATATGACATTGGCTTGTGGTAGTGAGAAAGCGGCTGAGTAAAAGCAAGCCCGGATGTTTTCAAGTTTGTACAAGTGAGATC	0	NW_022145607.1:33431065-33431226	NW_022145607.1	33431065	33431226	blimp1/kroxD	0	GATCTCACTTGTACAAACTTGAAAACATCCGGGCTTGCTTTTACTCAGCCGCTTTCTCACTACCACAAGCCAATGTCATATAGTTTCCTTTCTCGTGCACAATAGGTCATAGGCCTCGTTAGTATTCGGCCACATCATTTAACTGTTCATGATCAGGGGCG
Scaffold1008:87452-88171	Scaffold1008	87452	88171	WHL22.5073	SPU_027235	TCCTTGCCAACTATAATACTAGCATCGAACATGAGTCATTATTTTACGAGATTGAACAATCTCGATCTTTATCTGTCGATAAAAATGTATCAATACATAATGAGACAGTTCGTCTGTTTGCGCAGGGGCTACAACATGGAATAAGAGAATGGGGAATGTCGGATTTACAGGTAAACTAAACACCCAGAGCCATTCGTCCAACTTGAATCTTTTGTCCAAGCACAATGCAAATCTGATATTTAAAGAGGCTGGTAACAAATTAACCGGCGTGTTTGAACACAACGGCTTGAATAGAGGGACAAGGGCGCAGCGAGGCCGCGGCTTTTGACCAGGCGGGTGGCGGTATTGTTCCCCTCAAGTATCGGCTCCTGCGAAGTGGTCAGCCCCCCTGTTCGCTCT…	0	NW_022145607.1:33427146-33427865	NW_022145607.1	33427146	33427865	blimp1/kroxD	0	GCCTTTATtttggatttttgttgttgccgaAAAAGCATATTGTTTTGGTGAAAGATCTCTCGTCCGTTCTACTTGTTccattcttttatattttaaacGCATCGAATCGGTTCAATAAAAAGTACAATGACACTGTGATAAGCGTGAGTCGTATACGCAAGGGCAAGACCTTTTGGAGGAGTCGGTAAATATAACTCGGCAATAATCGGGAGAAATTCAAAGCCTTCAAAGGAAAGGCTACTTAAACTGCGTGTTCTTGCCATGATGAAAATGAGCACTAACACTTTCCTCAAACACAGATTAGTAAAGTGATCCCTTTCAGAGCGAACAGGGGGGCTGACCACTTCGCAGGAGCCGATACTTGAGGGGAACAATACCGCCACCCGCCTGGTCAAAAGC…
Scaffold1008:95259-95654	Scaffold1008	95259	95654	WHL22.5073	SPU_027235	AGATTCCAGGGGAGCGTTTCACAAAGACTAAGAACGACTTTAAGTTGGACTTAACTATGGCAGGCTGTTCATGCCACTGTTTGCTCTCACCATTATGATCTATAAATAATATTTTTTCCTTCAATAATGAGTTATNNNNNNNNNNNNNNNNNNNNNNNNNNNNNNNNNNNNNNNNNNNNNNNNNNNNNNNNNNNNNNNNNNNNNNNNNNNNNNNNNNNNNNNNNNNNNNNNNNNNNNNNNNNNNNNNNNNNNNNNNNNNNNNNNNNNNNNNNNNNNNNNNNNNNNNNNNNNNNNNNNNNNNNNNNNNNNNNNNNNNNNNNNNNNNNNNNNNNNNNNNNNNNNNNNNNNNNNNNNNNNNNNNNNNNNNNNNNNNNNNNNNNNNNNNNNNNNNNNNA	0	NW_022145607.1:33419560-33420516	NW_022145607.1	33419560	33420516	blimp1/kroxD	0	TCACCTGTTGCACGACACTTCCATGCGAAATGCTATGGGGCAATGACACTAACCGgcgaattcctaacttcaaccctggacctcATACTAAATCCAACCCCAAACCCTTGCCCAAAacctttaaagcccgtctgtacaagtgtacagaagggattagaccaccctgcaaggtcactggacaggtggttatctcatcaaatcagctctcgataaacataagaaaaagagcatcATAGGTgatcaatggtcaccgattaggcatggtttgttatatagagggagcaagtagctacacgtaGTACACCCATTTACAACCATACTCCAGTAACTTCAAACAAAATTTGTCTGATGACCGTCATGCCACGTCGGCATTGGAGAGGGAAGATAGTTTTTAATCAC…
Scaffold1008:95847-96075	Scaffold1008	95847	96075	WHL22.5073	SPU_027235	GTACAGAATTAAGAACGTGACTCTTGGCGCTCCGTAAATCAGTGAACTATGCTAAAGACAAACTTGCGTCCTGGTCCTGCGATTCTTTTGTTTAAAATGTTTGATTTGGAAAGCGATTGGAAAAGGTTGCTTGTGAATTAGAATCATTCAAAATGTATTGACTCTGCCTTGCTGAAAGTCAAATGCAATGTACAGATGAATGTGCACATGGGTCTACACGAAACACGT	0	NW_022145607.1:33419139-33419367	NW_022145607.1	33419139	33419367	blimp1/kroxD	0	ACGTGTTTCGTGTAGACCCATGTGCACATTCATCTGTACATTGCATTTGACTTTCAGCAAGGCAGAGTCAATACATTTTGAATGATTCTAATACACAAGCAACCTTTTCCAATCGCTTTCCAAatcaaacattttaaacaaaagaatcGCAGGACCAGGACGCAAGTTTGTCTTTAGCATAGTTCACTGATTTACGGAGCGCCAAGAGTCACGTTCTTAATTCTGTAC
Scaffold1008:97226-97481	Scaffold1008	97226	97481	WHL22.5073	SPU_027235	CATGCATAAACACGTAATATGACAGCTGGGTAGGAAAGCAAGTTGTAAATACACCATTAAATATGATCAAATGTATAATTGATAAATTAATCCATTTAATGAACTGTTAAAAGCTCTTTTTTTCTTCTCTCTCTCTCTCTCTCTGTCTCTCTCTCTCTCTCTCTCTCTCTCTATCTCTCTCTCTCTCTCTTTCTCTCCTTCTCTTTCTTCAATTTTCTCAATATTCAGGGTGATATCTGTTTTTACATGTCTCCG	0	NW_022145607.1:33417719-33417995	NW_022145607.1	33417719	33417995	blimp1/kroxD	0	CGGAGACATGTAAAAACAGATATCACCCTGAATAttgagaaaattgaagaaagagaaggatagaaagagagagagagatagatagagagagagagatagagatagagagagagagagagagagagagagagagagagagagagagagagagaagaaaaaagagcttTTAACAGTTCATTAAATGGattaatttatcaattatacATTTGATCATATTTAATGGTGTATTTACAACTTGCTTTCCTACTCAGCTGTCATATTACGTGTTTATGCATG
Scaffold1008:97632-98222	Scaffold1008	97632	98222	WHL22.5073	SPU_027235	CTCCTCACAATCATATCATCCACTCGTATAAAACATTTGAAATAGTCAAAATAAGAGATGACGTCATTGTGGTGGGGATTTCCCAAATTAATTGCTGTCGAATTCCACAGTTAGTATTGCTCAATTACATACACATTCCAATGAAATACTTCCTATTAATAATATCTGCATCAAAAAATAAATCGTCCGCATGCATTTTTGTTTGCTTGGCCCAGTGCCTCCGTGAATTGACACGTAGCCTTTGTCCCAAGCAACTCTTATTATTGACATATCGGATCCAAGGCTCAATCTAGTTACCAATGGTTGACCAAAGAAATGTTGGTCTTCTGAATATTATTATTTCATTCTTGAAATGACAATAGAAATAAATGTAAATATCAGACAATGAAAGCTGACTTT…	0	NW_022145607.1:33416978-33417568	NW_022145607.1	33416978	33417568	blimp1/kroxD	0	CTCTCGATAGCTTATCATACTGTCACAAGCCTCATGTTCCATTGGCATTTAATAGAAAGGATGAAAATAAACCTCCTACTTCGCGAAATTGCACAATAACCCTTCATTATATTACAGCGTATAGCGCCAGCCACCGCATGATGAAGAGTCCTGAACATTTCCTATCAAAACCTAGATCAAACACGGACATCAAAGTCAGCTTTCATTGTctgatatttacatttatttctattgtcatttcaagaatgaaataataatattcagaagACCAACATTTCTTTGGTCAACCATTGGTAACTAGATTGAGCCTTGGATCCGATATGTCAATAATAAGAGTTGCTTGGGACAAAGGCTACGTGTCAATTCACGGAGGCACTGGGCCAAGCAAACAAAAATGCA…
Scaffold1009:103836-104287	Scaffold1009	103836	104287	WHL22.5154	SPU_003201	TGGCCCAACCACCGTCGGCGTTGTCACTGCGATCGGCCTTGTAGCGGCCGCTGTTCTGCAGAACCATTCTGAAACGATCCGAGTCTAAAACGACGATAAATGCACTCTAAATTCTGCCTTTTAAGTGACTGATCATAAAATATCAATACCCGAAAGGGGAGGCACAATTATTTGAAGATAAACAGTTTCCTCGGATGTCCATAAACCAATATTAGAAGGTTATTTCTGTTCAAGTAATGCATTCAATAACTGGAATTGTCGAAAAGATATCTTCGTCTTTGGCGCGGGCGCGAAATATATTGGTCTAAAGAGGGAGACAGACGCACACACCTCATAGGTTTTCTGTACAGCTGTTCGTGAAAACACAAGTGTTCAAAATGGGGACAAACAATTTGAAAT…	0	NW_022145594.1:28025826-28026277	NW_022145594.1	28025826	28026277	LOC115921308	0	TGGCCCAACCACCGTCGGCGTTGTCACTGCGATCGGCCTTGTAGCGGCCGCTGTTCTGCAGAACCATTCTGAAACGATCCGAGTCTAAAACGACGATAAATGCACTCTAAATTCTGCCTTTTAAGTGACTGATCATAAAATATCAATACCCGAAAGGGGAGGCACAATTATTTGAAGATAAACAGTTTCCTCGGATGTCCATAAACCAATATTAGAAGGTTATTTCTGTTCAAGTAATGCATTCAATAACTGGAATTGTCGAAAAGATATCTTCGTCTTTGGCGCGGGCGCGAAATATATTGGTCTAAAGAGGGAGACAGACGCACACACCTCATAGGTTTTCTGTACAGCTGTTCGTGAAAACACAAGTGTTCAAAATGGGGACAAACAATTTGAAAT…
Scaffold1009:36018-36407	Scaffold1009	36018	36407	WHL22.5109	SPU_009208	CCTGCAGGATTTAAAAAAAAAGAAGATAATGTGAAATTCTCGAAAGCGGACTAACTTTAGTCCATGGTTTAATCCAACGACTAAGTATGGAATGCCAAATCAAAAATCATCACATATCACTCCTATCTTGAAAGCGTGTGATCTATAAAATTCTACTCTTAACCTATCGTGCACTAAATGATCTAGCTCCAGAATATATTTCATCCCTTCTATCACCCCACTCTGCAGGTCGCTCTGATTTACGTTCATCACATAATATTAGACTTAAAGAAATACGTACCAAAAGAAATTGGGGGGATAGAGCATTTGCATCAGCAGCTCCTTCATTGTGGAATAAGTTACCTCTCTCTATTCAGACGGCCAACACTCTCTCTTCTTTCAAAACTGGG	0	NW_022145614.1:23437439-23437440	NW_022145614.1	23437439	23437440	LOC115918365	1070	c
Scaffold101:115695-116058	Scaffold101	115695	116058	WHL22.5521	SPU_014742	CGATGCAATGCAAAGAGCAGCAAAAATAATGCATTTGAAAAAGAGAAAACATTAATTAGCACGTTAGCATGTCTGATAATCCTGGGAAAAGCATGTACCGTATTAAAGCATTCAATGTATCATATATTATTTAAATTCAACGACACTAATAATTTGTTTAAAGCCAGATGGGCATTAAAGGTACTAGGTCCCTTTTGCAGCCAACCTCAAATTCTGTAGAGCTTTGCAGAAATTATGAATATGTCATGTATGTCCTATCTGTGAAATTTAAACGTTAGCAGTGTCCTCATATTCAAATTATGCAAGGAAACCCGTTTACTTGCTAGACTTCACTGTCAGACACTATTGAGTGACTGACTGGCT	0	NW_022145604.1:2621682-2622045	NW_022145604.1	2621682	2622045	LOC577253	0	CGATGCAATGCAAAGAGCAGCAAAAATAATGcatttgaaaaagagaaaacattaatTAGCACGTTAGCATGTCTGATAATCCTGGGAAAAGCATGTAccgtattaaagcattcaatgtatcatatattatttaaaTTCAACGAcactaataatttgtttaaagccaGATGGGCATTAAAGGTACTaggtcccttttgcagccaacctcaaattctgtagagctttgcagaaattatgaatatgtcatgtatgtcctatctgtgaaatttaaacgttagcagtgtcctcatattcaaattatgcaaggaaacccgtttacttgctagacttcactgtcagacactattgagtgactgactggct
Scaffold101:14187-14585	Scaffold101	14187	14585	WHL22.5040	SPU_018764	CACATTATATAGCATATACTGAATAATGACTGCAACACACTTTTAGGCTCTGGAAGGCCCAAGAAGTGCAGCTGTTTAGACTAATAAAATTGCAAAAAAAATCTCGCTCGGTCGCTACGCTCCCTCGCATAACATCCTCGTAAAAAAAAAAAAAAATCGCATTTCGTCCCCCCCCCCCCCCGGTCATTAACAGAAATCGCCGCCCCTGATTCCACGACATTTTGGTCTTCCTCTTCTCCTCAAAAGTCCCTAATATTGATTTACTGGTCGAGGTTCATTATTTGCTGACAACGAAAAACTTCTCCAGGCCATGACCATGTTTCTGCCCTTGCCCGATCGCCTCCAGCTCCAGCAGACATGACGCGGCAGCGTGCACACGCACCTCTACTAACGGCGCA	57960	NW_022145606.1:32389203-32389352	NW_022145606.1	32389203	32389352	LOC594372	11651	ttttttttttacgaggatgttatgcgagggagcgtagcgaccgagcgagattttttttgcaattttattagtctaaacgctgcactcttgggccttccagagcctaaaagtgtgttgcagtcattattcagtatatgctatacaatttg
Scaffold101:157671-157756	Scaffold101	157671	157756	WHL22.5613	SPU_014746	CCGATAGCTAGCCTCGCTTCGAACAGTCTTTGATGTCGACGGTTGTTCCGCTGAGCTGAGATTACGTTTGGCTCCACTGACCTCA	0	NW_022145604.1:3151079-3151164	NW_022145604.1	3151079	3151164	LOC577380	0	cCGATAGCTAGCCTCGCTTCGAACAGTCTTTGATGtcgacggttgttccgctgagcTGAGATTACGTTTGGCTCCACTGACCTCA
Scaffold101:233043-233239	Scaffold101	233043	233239	WHL22.5099	SPU_021021	GGAAAAACAGTAAAGTTTCCGTTTTTTCCAACTATTCCAATGATTGCACCTGCTCTGATTTATGGGTAATTACCAGAGATTGAGACATGCTGCCTTGAATTATGTGGGTAATACCGTCCTGTATCACTCCACTATAATGACCCGTACGTGTGTAGAGAATTCCCTGATGTGACAATGGTTGACCTATACAGTAAAG	0	NW_022145604.1:3223565-3223761	NW_022145604.1	3223565	3223761	LOC105437797	0	GGAAAAACAGTAAAGTTTCCGTTTTTTCCAACTATTCCAATGATTGCACCTGCTCTGATTTATGGGTAATTACCAGAGATTGAGACATGCTGCCTTGAATTATGTGGGTAATACCGTCCTGTATCACTCCACTATAATGACCCGTACGTGTGTAGAGAATTCCCTGATGTGACAATGGTTGACCTATACAGTAAAG
Scaffold101:239996-240391	Scaffold101	239996	240391	WHL22.5099	SPU_021021	TGTGGCAGATTTATCGGAAATGAACTACTGTTACCGAGGGCAAGGTAGCCGGAAAACGAAAGGATTGACGTCATCATGTCGTGTCTCATAACATTAAAGCAGTCCATCGAACTCTCAAATGGTTAAATCTAAAAAGTCATGCTTGGAACCGTTATGTATACTATATGTTTGATATGTTTACATTTCTTATATAGGCCAGAGATCAATGTGATTGCAGATAAATGATAATAAGAACAAATACAAATAAATGATAAAAACAAAATTCCTTTGGCTAGTTTGATGTTCTTGTCGAAATAATTAATGTCACCAAACTGCCAAAGGCAAATTTGATGACGATACCAAATCTGCCAATGGGACCGTCACTCAACTTTTCACCCTCGAAACCTGAACATTGG	0	NW_022145604.1:3230080-3230478	NW_022145604.1	3230080	3230478	LOC105437797	0	TGTGGCAGATTTATCGGAAATGAACTACTGTTACCGAGGGCAAGGTAGCCGGAAAACGAAAGGATTGACGTCATCATGTCGTGTCTCCTCATAACATCAAAGCAGTCTATCGAACTCTCAAATGGTTAAATCTAAAATGTCATGCTTGGAACCGTTATGCATACTATATGTTTGATATGTTTACATTTCTTATATAGGCCAGAGATCAACGTGATTGCAgataaatgataataagaacaaatacaaataaatgataaaaacaaaattccttTGGCTAGTTTGATGTTCTTGTCGAAATAATTAATGTCACCAAACTGCCAAAGGCAAATTTGATGACGATACCAAATCTGCCAATGGGACCGTCACTCAACTTTTCACCCTCGAAACCTGAACATTGG
Scaffold101:242116-242358	Scaffold101	242116	242358	WHL22.5099	SPU_021021	TCTTTCACATTCATTCAAGAATCAATACATGAAAGAAATCAGATTTGAAACTTTAATTTTGTTTTTGACCCCAATGCATACAGTTATCACGAAATGAATTATAGTATGTGTCGTATACACACACGCACACATATTACACACACACATATATATTTGCGTGTGTGGGTGTGTGAGTTATTACCTTTTGGTTGGTTTCTTTCTTTCTTTTAGCATAATTTTTACTATTCTTCCATTTTGACAGT	0	NW_022145604.1:3232235-3232477	NW_022145604.1	3232235	3232477	LOC105437797	0	TCTTTCACTTTCATTCAAGAATCAATACATGAAAGAAATCAGATTTgaaactttaattttgtttttgacccCAATGCATACAGTTATCACGAAATGAATTATAGTATGTGTCgtatacacacacgcacacatattacacacacacatatatatttgcgtgtgtgggtgtgtgagtTATTACCTTTTGgttggtttctttctttcttttagcaTAATTTTTACTATTCTTCCATTTTGACAGT
Scaffold101:265231-265590	Scaffold101	265231	265590	WHL22.5102	SPU_021021	ATTGTTGTTGTCAGTTGTTATTAATATTATTATTTTACAGACGGAGACAGACTGCACCTGTTCTCTGGAACTCACTTCCTTCTTATCTGAGGAAGTTAGATTCAACAGAATAATAAAAACACAGCTAAAACGTATCTATGTTGAGCTATTTTTTATGTAACTTGGGTATTTATTATTGTCGTGCCTTGATCAAAAGTTTTGGATGCGTGAGCATTATAAATGAATAAATCATTTTTTCTTTTAACTCTTGTAGGTGGTGTAATAGGTAAAGGAGCCTTTGGTATGGTCATCAAAGCTGTTGCTGTAGGCATTGATGGGACTGAGAATAACATCACAGTGGCAGTCAAGAAACTCAAAAG	0	NW_022145604.1:3256678-3257037	NW_022145604.1	3256678	3257037	LOC105437797	0	attgttgttgtcagttgttattaatattattattttacagaCGGAGACAGACTGCACCTGTTCTCTGGAACTCACTTCCTTCTTATCTGAGGAAGTTAGATTCaacagaataataaaaacacagCTAAAACGTATCTATGTTGAGCTATTTTTTATGTAACTTGGGTATTTATTATTGTCGTGCCTTGATCAAAAGTTTTGGATGCGTGAGcattataaatgaataaatcattttttcttttaactctTGTAGGTGGTGTAATAGGTAAAGGAGCCTTTGGTATGGTCATCAAAGCTGTTGCTGTAGGCATTGATGGGACTGAGAATAACATCACAGTGGCAGTCAAGAAACTCAAAAG
Scaffold101:343915-344292	Scaffold101	343915	344292	WHL22.7141	SPU_010441	CTTTTTTGCTACCAGAAACAATTCTCATCTCCTCGACAGCTGTTTGGACTTGGAGGAGCAGGTCGCGCTAGAAAGCATCGCTAAGAGAAAGACGGAAGAGAAGTCTACGGTTCTTGATCATCTTAACCCCTTGGATACTAGGCCATCATCAAATCTGGAACAACCTTAACCCCTTTGGACTTTGGTGCTACTAAATTTTTGAACAATCATCATAAAGTCTGTTAGAAGCCAAAAGGGCATTAACTCACATTATGAACATGACAGACAAAATATACATTTCCTCAGGTAGACAAAGGAACATCTCTTCACTGCTATTATGTAAAAATGTGTAGAACAGGTGAATATGCATGTGACACCTGTGAAGGGATGTTTCTTTG	0	NW_022145604.1:2848695-2849111	NW_022145604.1	2848695	2849111	LOC115918793	0	CTTTTTCGCTACCAGAAACTATTCTCATCTCCTTGACagctgtttggacttggaggaacaGGTTGCGCTTGAAAGCATCGCTAAGAGAAAGACGGAAGAGAAGTCTACGGTTCTTGATCATCTTAACCCCTTGGATACTAGACCATCATCAAACATGGAGCAACCTTAACCCCTTTGGACTTTGGTGCTACTTGATTTTTGAACAATCATCATAAAGtctagagccaaaagggcattaactcacactatgaacatgacagacaaagaaagcagacaaaatatacatttcctcaggtagacaaaggaacatctcttcactgctattattatgtaaaaaatgtgtagaacaggtgaatatgcatgtgacacctgttctacacatttttacataatagcagt…
Scaffold101:377053-377078	Scaffold101	377053	377078	WHL22.7151	SPU_010441	GAAAGAAAATAACACATTTAAAGAT	0	NW_022145604.1:2874559-2874584	NW_022145604.1	2874559	2874584	LOC115918793	6	GAAAGAAAATAACACATTTAAAGAT
Scaffold101:378771-379413	Scaffold101	378771	379413	WHL22.7151	SPU_010441	AAGTCAAATATCTAAAACAATAAGTTTAAAGTTCCAATTAAGAGCTGGCAGTATACCCCGCTTTTAAAATTGAAGCTACAAAACTTGTACACACTCTGTGACAATTTTTAACGTGGAAATCCCCACTCGTTGACAATTAGCTCATAGTTAAGTTTGGTGAAATTGACACGACCAGACAACGAATCAAGACCATTAGCCTTTTAATTTGTTGTTTTCCTTGGCTGGTATCAGGGACGACCCCCCTGTTTCGGAGGAGGGAACCTTTATCACGAAACGACGTATGTGATAGGTCAAAGAAAGTGGTGGTGATTGCCTTTTAACCAATCAATGCCCAGCTGGCCCACATGACTACTTTGCTGGAGGGTGATTTAGCGACCCGGATATAAACAACCGTCTATA…	0	NW_022145604.1:3353347-3353989	NW_022145604.1	3353347	3353989	LOC580186	0	AAGTCAAATATCTAAAACAATAAGTTTAAAGTTCCAATTAAGAGCTGGCAGTATACCCCGCTTTTAAAATTGAAGCTACAAAACTTGTACACACTCTGTGACAATTTTTAACGTGGAAATCCCCACTCGTTGACAATTAGCTCATAGTTAAGTTTGGTGAAATTGACACGACCAGACAACGAATCAAGACCATTAGccttttaatttgttgttttccttGGCTGGTATCAGGGACGACCCCCCTGTTTCGGAGGAGGGAACCTTTATCACGAAACGACGTATGTGATAGGTCAAAGAAAGTGGTGGTGATTGCCTTTTAACCAATCAATGCCCAGCTGGCCCACATGACTACTTTGCTGGAGGGTGATTTAGCGACCCGGATATAAACAACCGTCTATA…
Scaffold101:526885-527603	Scaffold101	526885	527603	WHL22.5468	N/A	GCAAGAGTATATTTTATTATATAACTCTAAAAACGATGAGTCACATAGTCCAGATTCACAAGTATATTTACAAGATATAGAGCAGACGAAGTATAGGTACTAGCTTGGTGATGGTCTGAACTCTTCTCCCCCCAGAAAGCTAGAACCTCTCATAATTATACAGGAGGACACAAGGAATATGAGGGTAGGTTACATTGTGTCAAAGGGACAAAGACAATTCAATTCTCATAATCATCTAGCTAACACTGTTCTGGGAAAGGGTCTTATCAAACAAAGGGGGCTTTGGTTATTGGGAGAAAGACAGGAAGTCTTTTGTTTTGGAGGTTTGTGGGGCACTTTAAAGATGTATACAATTTGGGGTTTATTTGGCTGGAATAAGTTAATTAACGAATGTCTTCG…	0	NW_022145604.1:3483742-3484459	NW_022145604.1	3483742	3484459	LOC105437804	1447	GCAAGagtatattttattatataacTCTAAAAACGATGAGTCACATAGTCCAGATTCACAAGTATATTTACAAGATATAGAGCAGACGAAGTATAGGTACTAGCTTGGTGATGGTCTGAACTCTTCTCCCCCAGAAAGCTAGAACCTCTCATAATTATACAGGAGGACACAAGGAATATGAGGGTAGGTTACATTGTGTCAAAGGGACAAAGACAATTCAATTCTCATAATCATCTAGCTAACACTGTTCTGGGAAAGGGTCTTATCAAACAAAGGGGGCTTTGGTTATTGGGAGAAAGACAggaagtcttttgttttggaggTTTGTGGGGCACTTTAAAGATGTATACAATTTGGGGTTTATTTGGCTGGAATAAGTTAATTAACGAATGTCTTCGA…
Scaffold101:557008-557158	Scaffold101	557008	557158	WHL22.5259	N/A	TGCAGGATTGATCAGACATAGAGAAGGGAGAGAGAGAGGTGGAGGCGATTAGACAGGACTTGGATCGAGAGGCAGGCGCGTAGTCAGGGCGGTGGGGCGGTTGCACGCCCCCAAAACGTCGACCAAAAACAAAGAGAGAGAGAAGAGAAG	1123	NW_022145604.1:3032336-3032490	NW_022145604.1	3032336	3032490	LOC100889285	0	TGCAGGATTGATCAGAcatagagaagggagagagagagagaggtggaggcGATTAGACAGGACTTGGATCGAGAGGCAGGCGCGTAGTCAGGGCGGTGGGGCGGTTGCACGCCCCCAAAACGTcgaccaaaaacaaaaagagagagaagagaag
Scaffold101:584713-584943	Scaffold101	584713	584943	WHL22.5259	N/A	AATTCCGTGTTCGTGTACCTGGTACCTGTTTCATAGAAACCTGTTATCAGTAACAAGTTACAATAACTGGTAGGCTACTTAAATAGTGGCATTTGATCAGCTGAGAGCACATTGGTCATAAAATCCTAGAATAATTTATTATCAACCTTGGAATAGACACTTTATTTCTTCCAAGTTTATTGGTAACGCTATTCCTGTTTTCTATAATTTCATTGACAATGTTATATAGA	28828	NW_022145604.1:3057587-3057817	NW_022145604.1	3057587	3057817	LOC100889285	0	AATTCCGTGTTCGTGTACCTGGTACCTGTTTCATAGAAACCTGTTATcagtaacaagttacaataactggtACGCTACTTAAATAGTGGCATTTGATCAGCTGAGAGCACATTTTTCTTAAAATCCTAAAATAGTTTATTGTTAACCTTGGAATAGACACTTTATTTCTTCCAAGTTTATTGGTAACGCTATTCTTGTTTTCTATCATTTTATTGACAATGTTATATAGA
Scaffold101:677961-678163	Scaffold101	677961	678163	WHL22.5670	SPU_005889	TGGTCCTATCGCGTGAATGAGAACTTCTATCGTTTTTACGATTATTATTATCCCTGCCAAACATAATATTATCATACTCATTTATATGAACCACAACCAAAAAATATGGTCCTATTACGCGAATGAGAACTTCTATAGAAGTTGTCTTCGTGATTATTATTATTGTTGTCATAAACTCCAAACAAACACTACTATCCTATCG	7202	NW_022145609.1:33755622-33755823	NW_022145609.1	33755622	33755823	LOC105447229	12814	cgATAGGATAGTAGtgtttggttggagtttatgacaacaataataataatcacgaagACAACTtctatagaagttctcattcgcgtaataggaccatattttttggttgtggttcatgtaaatgagtatgataatatatgtttggcagggataataataatcgtaaaaacgatagaagttctcattcacgcgataggacca
Scaffold101:687048-687432	Scaffold101	687048	687432	WHL22.5670	SPU_005889	CGTCTATTAGTAATAGTATTGGCATTTTATCACTACGAAAGATACAACCCCCCCCCCCCCCTACCTATTGTAAATATTGTTGTAAATACTATGCAAGATAAGATAAGATAAAAGATACAACAATTTTCAGAATACCAATTATTTTGTCATATTATCTATCGTACGCATATGCAAATGAGGATTAAAGCCACACTGTCCTACTTGTAGCTACTTGCTCCCTCTATAGAGAAAACAATGCCTAATCAGTTACCATTGATCCCCATGATTCTCTTTTAATTATGTTAATTAAGAGCTGAGTTGATGAGATAACCATAACCACCTGTCCAGTGACCGTGCAGGGTGGTGTAATCCCTCCTATAAACTAGTACAGATAAGCTTTAAGTG	0	NW_022145599.1:16545538-16545921	NW_022145599.1	16545538	16545921	LOC115923508	0	cacttaaagcttatctgtactagtttataggagggattacaCCACCCTGCacggtcactggacaggtggttatggttatctcatcaactcagctcttaattaacataattaaaagAGAATCATGGGGATCAATGGtaactgattaggcattgttttctctatagagggagcaagtagctacaagtaggacagtgtggctttaatcctcatttgcatatgcgtaCGATAGataatatgacaaaataattggtattctgaaaattgttgtatcttttatcttatcttatcttgcatagtatttacaacaatatttacaataggtagggggggggggggttgtatctTTCGTAGTGATAAAATGCCAATACTATTACTAATAGACG
Scaffold101:690302-690653	Scaffold101	690302	690653	WHL22.5670	SPU_005889	CCCCAGTTATTTATTTTAAATTTATTTTAAATACATGTATTGATATTTGAATAAGTTGACATAATTGTGTTGATTTGTACAATTTCTAGTGATTACACTTTATTGTGGATATGTTCACTTTCCATGCTATTACCAATTATCTAAAGGTTCTGCCTCCAGCACGATGTTATATGTATTCTCGATTGCCTTTCTTTAAACTATTTAGATAAAATCTTTGATCATGCTATTTTACATTTTCTTATCAAATTCTGTGTTTTTGCTAAGTCTACAGATGTATATTAGACTGTAACATATTTAGATTTATTATTTCTCCTTTTTCTTGTAATTTTCTTTTCTTTATAGTATAGCAGC	0	NW_022145599.1:16542334-16542685	NW_022145599.1	16542334	16542685	LOC115923508	0	GCTGCTATactataaagaaaagaaaattacaagaaaaaggagaaataatAAATCTAAATATGTTACAGTCTAATATACATCTGTAGACTTAGCAAAAACACAGAATTTgataagaaaatgtaaaatagcATGATCAAAGATTTTATCTAAATAGTTTAAAGAAAGGCAATCGAGAATACATATAACATCGTGCTGGAGGCAGAACCTTTAGATAATTGATAATAGCATGGAAAGTGAACATATCCACAATAAAGTGTAATCACTAGAAATTGTACAAATCAACACAATTATGTCaacttattcaaatatcaatacatgtatttaaaataaatttaaaataaataactgGGG
Scaffold101:705062-705415	Scaffold101	705062	705415	WHL22.5670	SPU_005889	TCCCCCTCCCAATTCCCCCCGTGGCTACGCCAATCAAATTTTCCTACTCTTTCTTGAATATTAGAGTTCCGACTAAATTGAAGGTTTGTTTTCTCTTTATTTAAAACAGAGCTTGTATTGGTGGGTGAACCCCTCCCCCATTCCTCATTTAATACAGAGCCTGAATTAGGTCTCACCTAATACAGGCTCAGTACTAAAAGAGCCCCCATGAGAAGGCTCACAGGGGCTCTTTTAGTACTGAGGGGGGCTCATATTTTGTACAAATTTCCATTGAATTGGTACCCATGATACTCCTCAATTCTTTGCTATTTCATCATTATCACTTATTTAAGTCAGCATTTTCCCTCTTACAA	6869	NW_022145599.1:21674462-21674815	NW_022145599.1	21674462	21674815	LOC105437805	3858	tccccctcccaattccccccgtggctacgccaatcaAATTTTCCTACTCTTTCTTGAATATTAGAGTTCCGACTAAATTGAaggtttgttttctctttatttaaaacagagctTGTATTGGTGGGTGAACCCCTCCCCCATTCctcatttaatacagagcctgaattagGTCTCACCTAATACAggctcagtactaaaagagcccccatgaGAAGGCTcacaggggctcttttagtactgaggGGGGCTcatattttgtacaaatttccattgaattggtacccatgatactcctcaattctttgctatttcatcattatcacttatttaagtcagcattttccctcttacaa
Scaffold101:748278-748389	Scaffold101	748278	748389	WHL22.5892	SPU_002452	AAAAAAATAATAAAGCAAAGTATACAGACAAAAATATTATAATGATATGGATGATGGATGTAAGGAAAAACAGAAATAGGAAGAGAAGGTAAAGAACGGGGGTCAGAAGAA	3836	NW_022145594.1:48863118-48863229	NW_022145594.1	48863118	48863229	LOC115921415	1323	ttcttctgaccCCCGTTCTTTACCTTCTCTTcctatttctgtttttccttacatccatcatccatatcattataatatttttgtctGTATACtttgctttattattttttt
Scaffold101:785930-786029	Scaffold101	785930	786029	WHL22.5892	SPU_002452	TAGATACTCTCCGTGACTACATGGTCTGGTATGTTGAGTACCGGGCACCTGCTCACTATCAATAGAAGATATAAACGCTAGATTCGAATAGACCGATTT	0	NW_022145594.1:48827674-48827773	NW_022145594.1	48827674	48827773	LOC115921412	0	AAATCGGTCTATTCGAATCTAGCGTTTATATCTTCTATTGATAGTGAGCAGGTGCCCGGTACTCAACATACCAGACCATGTAGTCACGGAGAGTATCTA
Scaffold101:9536-9806	Scaffold101	9536	9806	WHL22.5040	SPU_018764	GTAGAGGGATTGGTCCTTTGGTAGAGGGATTGGTCCTTTGGTAGAGGGATTGGTCCTTTGGTGGAGTGATTGGTCCTTTTGGTAGAGGGATTGGTCCTTTTGGTAGAGGGATTGGTCCTTTTGGTAGAGGGATTGGTCCTTTGGTAGAGGGATTGGTCCTTTGGTAGAGGGATCGGTCCTTTGGTAGAGGGATTGGTCCTTTGGTGGAGGAATTGGTCCTTTGGTGGAGGGATTGGTCCTTTGGTGGAGGGATTGGTCCTTTGGTGGAGG	62739	NW_022145604.1:2481260-2481529	NW_022145604.1	2481260	2481529	LOC115926181	0	GTAGAGGGATTGGTCCTTTGGTAGAGGGATTGGTCCTTTGGTAGAGGGATTGGTCCTTTGGTGGAGTGATTGGTCCTTTTGGTAGAGGGATTGGTCCTTTTGGTAGAGGGATTGGTCCTTTTGGTAGAGGGATTGGTCCTTTGGTAGAGGGATTGGTCCTTTGGTAGAGGGATCGGTCCTTTGGTAGAGGGATTGGTCCTTTGGTGGAGGAATGGTCCTTTGGTGGAGGGATTGGTCCTTTGGTGGAGGGATTGGTCCTTTGGTGGAGG
Scaffold1010:138785-139243	Scaffold1010	138785	139243	WHL22.6202	SPU_003929	CTCCAACACTTACAAAAAAGAAGTAGGCAGATATCCACTAATTACAGTCGATGAAAGTTAACATACAAAAAAACAAAACAGGTAGGCCTAAACATCGGACAAAAAAAACAACTATTCACATGTATGACCAGGAGGACTATAAATAGGCAACAACAAAAAAATATGCAATAAACACAGGATGTTGTAGGTAGACAAACAAGAAAAGTAACAAACAGGAAGGTTTTTCCACCGATTACCGGACTATAAACATCCTCAAATTTGAAAAGAAGGGAAGCCTAAATGCCCTTCTTAGCATATCAATGGCCCAGCATGGCCCATACAATGGAAATGGAAGACAAAGCCCTTTGAAGAAATAGCATTAGCATTTCAATGCAGCGCAGCAGTAGCACAGCAGTATAG…	0	NW_022145609.1:38981899-38982353	NW_022145609.1	38981899	38982353	LOC100891565	22904	AATAGCGGGGGCATTGACCATCTCTGTTTGCGAGCCACTTGGGGCCTTACGGTGCTGCACTATACGGCTGTGCTACTGCTGTGCTGCATTGAAATGCTAATGCTATTTCTTCAAAGGGCTTTGTCTTCCATTTCCATTGTATGGGCCATGCTGGGCCATTGATATGCTAAGAAGGGCATTTAGGCTTCCcttcttttcaaatttgagGATGTTTATAGTCCGGTAATCGGTGGAAAAACCTTCCTGTTTGTTACTTTTCTTGTTTGTCTACCTACAACATCCTGTGTTTATTgcatatttgttatttgttaccTATTTATAGTCCTCCTGGTCATACATGTGAatagttctttttttcttctgacatGTTTATTCCGAATTCTTTTTGTTGGTGTTAAC…
Scaffold1010:139652-140025	Scaffold1010	139652	140025	WHL22.6202	SPU_003929	GTAGTAGCTGTAGTAGCTGTAGTAGCTGTAGTAGCTGTAGTAGCTGTAGTAGCTGTAGTAGCTGTAGTAGCTGTAGTAGCTGTTTTTACATACTGTTAACAGTCTTCTAGCCCTAAGCAGAGGATATAGGGTATTTAAAAATGTTTTTCTGAAATGAGTTCTCAAGAGATCAGCCCCTTCTTACATCATCTCCTGGGAGCCACAAGGGCATCTTATAGTTTTTTTGTGTCTTTTTACAAAGTGGTTTAAGTCCTTCTAGGTCATAAAAGAGCTTATAAGGGATTAGTATTACCCAGTAAGCTATGTTCCAAAGATTTCATAATCTGGAACAATATGTTGGTGCACACAGAGAGCATAATGACAGACAGTGTGC	0	NW_022145609.1:38981176-38981519	NW_022145609.1	38981176	38981519	LOC100891565	23738	GCACACCCTCCGTCATTATGCTCTCTGTCTGTGTGCACTAACATATCGTTCCAGATTATGAAATCTTCGGAACATATAGCTTACTGGGTAATACTAATCCCTTATAAGCTCTTTTATGACCTAGAAGGACTTAAACCactttgtaaaaaaagaaagaaactatAAGATGCCCTTATGGCTCCCAGCAAATGATGTAAGAAGGGGCTGATCTCTTGAGAACTCATTtcagaaaaacattttaaaataccgTATATCCTCTGCTTAGGGCTAGAAGACCGTTAACAGTATGTAAAAACAGCTACTACAGCTACTACAGCTACTACAGCTACTACagctactacag
Scaffold1010:147075-147349	Scaffold1010	147075	147349	WHL22.6202	SPU_003929	CGTTCATGAAATTTTCCAATAAATCATATAATACAAAGCAGAAGGAGCAAAAGGTCTGCACTCTGAGTACATGTAACATATGCCACCCAATCTTTCATACAAAAAGTTTCAAGGAGAATGTTGACATTATAATCCTGTTGCATAAGCAAAGCCAGTACATTGTGAAGACAAAGAGCTGGTAGTTGCTCTCACTTTCATTTTACAACCTCTATAGATCATCCGAATCCACTCATAAAATCCACTTGAAATTCAATACCAGTACCTCTTGAATATC	0	NW_022145609.1:38975456-38975731	NW_022145609.1	38975456	38975731	LOC100891565	29526	GATATTCAAGAGGTACTCTCGTATTGAATTTCAAGAGGATTTTTGAGTGGGTTTGGATGATCTATAGAGGTTGTAAAATGAAAGTGAGAGCAACTACCAGCTCTTTGTCTTCACAATTTACTGGTTTTGCTTATGCAACAGGATTATAATGTCAACATTCTCCTTGAAACTTTTTGTATGAAAGATTGGGTGGCATATGTTACATATACTCAGAGTGCAGACCTTTTGTTCCTTCTGCTTTGTATTATATGATTTATTGGAAAATTTCATGAACG
Scaffold1010:187446-187757	Scaffold1010	187446	187757	WHL22.6202	SPU_003929	GAAGAGGGAGGGATTCGGAAGATCGGTATTAAGCCGCGGATTTGGCTTTTGAAACTTGAGCAGGGTTGACGGTGTGAAGGGTAGCTTCTGGAAGCGCCCCGAGACGTCAAGGGAGCTCCCGTTCTCTTAATGAATTAAGGGGATTAACGGCAGCGTCAGATGAAGAAAAGCGCCAGACGACCTAAAGCTGTACTATGACAAAAGATGTGCTCTTAACAAGAGGCTGATGTCGTATGTGTGACATTGCATTTTCTAGGGAGGGAACGATTGGAAATAGGGAAGGGGTGAATGCTGGTTATCCCGGGAAACTT	35454	NW_022145609.1:38948509-38948819	NW_022145609.1	38948509	38948819	LOC100891565	56438	AAGTTTCCCGGGATAACCAGCATTCACCCCTTCCCTATTTCCAATCGTTCCCTCCCTAGAAAATGCAATGTCACACATACGACATCAGCCTCTTGTTAAGAGCACATCTTTTGTCATAGTACAGCTTTAGTCGTCTGGCGCTTTTCTTCATCTGACGCTGCCGTTAATCCCCTTAATTCATTAAGAGAACGGGAGCTCCCTTGACGTCTCGGGGCGCTACCAGAAGCTACCCTTCACACCGTCAACCCTGCTCAAGTTTCAAAAGCCAAATCCGCGGCTTAATACCGATCTTCCGAATCCCTCCCTCTTC
Scaffold1010:262398-262767	Scaffold1010	262398	262767	WHL22.6678	SPU_020441	CCAGTCAGAGAGATCATCATCTCCGAAATCATCTTCTGCATCTTTTTCTGCAGCTTGATTGGTACATTCTATACACTTACACAGATCCGTACAAGTGATCTTGTTTTTTACGCACTCACATTGCTTAGTGTGGCATTTTCCCTTTTTGCATTTACACTTGACTGCAGCGGTAAGGTGGTTGGGAGCCGGTGGCAAAGTGCTCCACTTGATGACCAACTCTCCATTCTCCATAACCCAGCCGTGCTCTGTCGGGTTTCCTTCCCCGATAAATTGCTGGAGTGATCTTCTGTGAATTGCAGCTTGATAGTTTGCTCTTCTAATGTGTAACAGAAGAGAGTCTTGATTCGGAGGAAGCGATGATTCAAACTT	6159	NW_022145526.1:1123465-1123834	NW_022145526.1	1123465	1123834	LOC105440883	0	AAGTTTGAATCATCGCTTCCTCCGAATCAAGACTCTCTTCTGTTACACATTAGAAGAGCAAACTATCAAGCTGCAATTCACAGAAGATCACTCCAGCAATTTATCGGGGAAGGAAACCCGACAGAGCACGGCTGGGTTATGGAGAATGGAGAGTTGGTCATCAAGTGGAGCACTTTGCCACCGGCTCCCAACCACCTTACCGCTGCAGTCAAGTGTAAATGCAAAAAGGGAAAATGCCACACTAAGCAATGTGAGTGCGTAAAAAACAAGATCACTTGTACGGATCTGTGTAAGTGTATAGAATGTACCAATCAAGCTGCAGAAAAAGATGCAGAAGATGATTTCGGAGATGATGATCTCTCTGACTGG
Scaffold1010:263086-263416	Scaffold1010	263086	263416	WHL22.6678	SPU_020441	CCCCTACCAGTGTGAAAGAGAACTCTGCTGTTCATTACACCTGAAAGACCTACAGCCACAACAAAAACATCGGTATCAGGACTTCTAATGATGACTGAGCTGGTTACTTGGGAGCTTGATGCCTGGTGCTGTGATGCATATTCACAGTGGAGAAGAAGTCTGGTATCAGCTTCTTCATGATCTGCAGTCAATTCTGGTACTTCCTCCACTACAAGCTTACCAGATGTGCTGTAAAAGGCATGGCATTGTGACGCATGTGCAAAGAACACTTTGACATTTCTGAACTTATCTGGGTGGGTGTTGGACCAAGTCTGAAATAAGAATTGTACA	5510	NW_022145526.1:1122816-1123146	NW_022145526.1	1122816	1123146	LOC105440883	0	TGTACAATTCTTATTTCAGACTTGGTCCAACACCCACCCAGATAAGTTCAGAAATGTCAAAGTGTTCTTTGCACATGCGTCACAATGCCATGCCTTTTACAGCACATCTGGTAAGCTTGTAGTGGAGGAAGTACCAGAATTGACTGCAGATCATGAAGAAGCTGATACCAGACTTCTTCTCCACTGTGAATATGCATCACAGCACCAGGCATCAAGCTCCCAAGTAACCAGCTCAGTCATCATTAGAAGTCCTGATACCGATGTTTTTGTTGTGGCTGTAGGTCTTTCAGGTGTAATGAACAGCAGAGTTCTCTTTCACACTGGTAGGGG
Scaffold1011:106848-107257	Scaffold1011	106848	107257	WHL22.6892	N/A	GAGCAAACACCGACATGTTTTGTGGGTTTTTCCCAGTAGTGTGAATGACACCCCCAAATTCTATGATTTTTATTTAATAGTGTTTTGGTTGTGTAAATGGCCTAAGCTTACTGCCTCTAATAGGATTAAGGCATGGACAATGATACCTATGGATAGTGGTAGGGTAGAGAGATGAAAAGCACCAATTAATAACAAGTCTCATTCTTTTATTCTTGTGATGTTCCTCTAGCCTTTATGGCATGGACTGACAAGGTAATCCTGATCCCAAATAATGGGTCCTGAGCTGAATCTCTAATCCCCGATTAAATGTCCATTTAGAGGTTGAAATCTGACATTTTCTCTTCAATAAGGAGAAGATTAATCAAATGTGTGGAACCTTCAAAAGTCATTGTAAAACCA…	0	NW_022145598.1:36181159-36182190	NW_022145598.1	36181159	36182190	LOC584010	35556	GAGCAAACACAGACATGTTTTGTGGGTTTTCCCCAATAGTGTAAATGACACCCCCAAATtctatgatttttatttaatagTGTTTTGGTTGTGTAAATGGCCTAAGCTTACTGCCTCTAATAGGATTAAGGCATGGACAATGATACCTATGGATAGTGGTAGGGTAGAGAGATGAAAAGCACCAATTAATAACAAGTCTCATTCTTTTATTCTTGTGATGTTCCTCTAGCCTTTATGGCATGGACTGACAAGGTAATCCTGATCCCAAATAATGGGTCCTGAGCTGAATCTCTAATCCCCCATTAAATGTCCattaaagctacagtcccatatacgtcccggaccgtcccggaccatcccggaccccatccggggtgatccgggattcggtccgtgttg…
Scaffold1011:20582-20972	Scaffold1011	20582	20972	WHL22.6855	SPU_013889	TCCCTGACGCTAGGATCAGGAACTTCCTGTCATCTGGTAGAGAGGTGGCTGCATGAGATACAAACAGATTCGGGTGTCAAATATAGGAAATAGATCAGTCAAAACAGTTCCGCTTAAACTCCCCCCAAAATAGATCAACTGTCAATCAAATATCTGCAGTGCATCCATACACAGAAATGGTTTGTCATACATTACCCTGGTAATGTGAAAAAAATAATCACTCAGTTAATAGACACCATGCCTTTCTATTAATTTCTACATTCATAGTTTTTTCCTGAACCTTAATTATTTCCTATGATGACACCCAGTAAGTCTTAAAGTGGGACTGCACTACTTGTAGCTACTTGCGCAAACAAACAATGCCTAAGCGGTACCCTTTGGTCTTCCATG	0	NW_022145598.1:36103455-36103845	NW_022145598.1	36103455	36103845	LOC593243	0	TCCCTGACGCTAGGATCAGGAACTTCCTGTCATCTGGTAGAGAGGTGGCTGCATGAGATACAAACAGATTCGGGTGTCAAATATAGGAAATAGATCAGTCAAAACAGTTCCGCTTAAACTCCCCCCAAAATAGATCAACTGTCAATCAAATATCTGCAGTGCATCCATACACAGAAATGGTTTGTCATACATTACCCTggtaatgtaaaaaaaataatcactcAGTTAATAGACACCATGCCTTTCTATTAATTTCTACATTCATAGTTTTTTCCTGAACCTTAATTATTTCCTATAATGACACCCAGTAAGTCTTaaagtgggactgcactacttgtagctacttgcgcaaacaaacaatgcctaagcggtacccttTAGTCCTCCAtg
Scaffold1011:25853-25903	Scaffold1011	25853	25903	WHL22.6855	SPU_013889	ATGAACCCTAAGCTTGCTTACACAACATTTACTAACTTTAAATACAAGTT	0	NW_022145598.1:36108308-36108358	NW_022145598.1	36108308	36108358	LOC593243	0	ATGAACCCAAAGCTCGCTTACACAACATTTACTAACTTTAAATACAAGTA
Scaffold1011:42748-43050	Scaffold1011	42748	43050	WHL22.6892	N/A	CCCTGCATTCAGCTATACGATCTACAGCCTTTTCACACACAGCTAAAATTCTATAAACATGATTAGTATAAACGTGTTTTGAACGTGTTTAAACTAATCACGAGCCTTTCACACACAGAAATTTCGTTGCGATCGTTAATAGTTTCGTGATTAACTACTGCTCGTAAAATGCGCAGTAGTGCCATTGCGCATTGAAGGTCATGTCATATCAATCAAAGCGCACGCTCCATCCAGTTTAAACACGTTTAAACACGAATTTCCTTTCACACACAAAATGTCAAGCTCTCTAGATACGAACTTCA	4086	NW_022145613.1:21708246-21708247	NW_022145613.1	21708246	21708247	LOC590019	7912	g
Scaffold1011:91629-91940	Scaffold1011	91629	91940	WHL22.6892	N/A	ACGATAGCATAATTCAGGGTCCAGTCTTGCAATGAGAATGAGGTCTACGTGTCACTCAGACTTTAGCTCTTCTTTCAAAACAAAACATGTTTACAGCCAGCAGAGATGGAGAGAGAGAATGGTGAATAGACAAGCTTGTAAACAAAATACCTGTGGTTTTAGCATTCACCCAAGACTTACAGGTAATAAGAATGGACAACAAGCTCTTGTGGTTTGAGCCAAGGAGGGAATTGAAACTGAATTTTATTGGTTGTTTTGAGTAAAAACCACTGGTGGGGTGGTGAAGCAATATCAAATATTGTCCCACCTCA	0	NW_022145598.1:36166211-36166522	NW_022145598.1	36166211	36166522	LOC593243	38715	ACGATAGCATAATTCAGGGTCCAGTCTTGCAATGAGAATGGGGTCTACGTGTCACTCAGACTTTAGctcttctttcaaaacaaaacatgtttacagccagcagagatggagagagagaatggtgaATAGACaagcttgtaaacaaaatacctGTGGTTTAAGCATTCACCCCAGACTTACAGGTAATAAGAATGGACAACACGCTCTTGTGGTTTGCGCCAAGGAGGGAATTGAAACTGAATTTTATTGGTTGTTTTCAGCAAGAACCACCGGTGGGGTGGTGAAGCAGCATCAAATATTGTGCCACCTCA
Scaffold1012:106617-106820	Scaffold1012	106617	106820	WHL22.6617	SPU_012793	ATGTTTTTAACATATTAAGGGGGGGGGGGGAACCAATGGTAGGCATGCACGGACGAGCATAACACCGTCAGAGGATACCTGCAGTTGTGATTAAGGAGCTATTGAATTGCTCATCAATTTAATGTCATGTCATTGTGTTGTGTTCAATAGACATTACCCGGGGAAATTACCATATAATAAGCTGATCGTTTACGTGGGACAGC	0	NW_022145594.1:11290994-11291197	NW_022145594.1	11290994	11291197	LOC586844	0	GCTGTCCCACGTAAACGATCAGCTTATTATATGGTAATTTCCCCGGGTAATGTCTATTGAACACAACACAATGACATGACATTAAATTGATGAGCAATTCAATAGCTCCTTAATCACAACTGCAGGTATCCTCTGACGGTGTTATGCTCGTCCGTGCATGCCTACCattggttccccccccccccttaatatGTTAAAAACAT
Scaffold1012:143713-143749	Scaffold1012	143713	143749	WHL22.6651	SPU_018074	GCATTAAATCAAGTGCGACAAAGTCAAGTTCAGGAG	0	NW_022145594.1:11254780-11254816	NW_022145594.1	11254780	11254816	LOC763421	0	CTCCTGAACTGGACTTTGTCGCACTTGATTTAATGC
Scaffold1012:157953-158361	Scaffold1012	157953	158361	WHL22.6653	SPU_018075	CCCTGCAGTCTTTAAATTCCCCATTTTCTTATAAAAGAATTCCCAAAAAGTTATTACACTGGTGTCAGAAGTGGGATTTGAAAGGTGGAATTTTAGAAGATTGTTAGGTCTAGTTAGGGAATAAGTCATATTTTGATTGTAGTAACTAGTAGTATAAAGTTAAGATAGGTCAATGGCAGTAGCCTACGTTCATTGTCATTGGCATCGTACACCACTGCACTGCAAAATCTCTGTGTGTATACGGGGAGCAACGCGTTGTATTGGTGTGTGTGTGTGTAGTAATGTTTTAGGATCGGTGTTTCAGTGCATGTGCTGAGCAAAGGGAAAGTTGGTAGTCCCGCAGGCTAGATACAGCTAGTCTTGCTTTGCAGACCCGATAAGCTACTTTTGTTTGGGGAA…	2689	NW_022145598.1:31255668-31256080	NW_022145598.1	31255668	31256080	LOC588851	0	TATCTTAACTTCCCCAAACAAAAGTAGCTTATCGGGTCTGCAAAGCAAGACTAGCTGTATCTAGCCTGCGGGACTACCAACTTTCCCTTTGCTCAGCACATGCACTGAAACACCGATCCTAAAACAttactacacacacacacaccaatacAACGCGTTGCTCCCCGTATACACACAGAGCTTTTGCAGTGCAGTGGTGTACGATGCCAATGCAATGACAATGAACGTTGGCTACTGCCATTGACCTATCTTAACTTTATACTACTAGTTACTACAATCAAAATATGACTTATTCCCTAACTAGACCTAACAATCTTCTAAAATTCCACCTTTCaaatcccacttctgacaccagTGTAATAACTTTTGGGAATTCTTTTATAAGAAAATGGGGAATTT…
Scaffold1012:1777-2405	Scaffold1012	1777	2405	WHL22.8014	SPU_012792	AGGTTGGTCCACCCAAAAGTGAAATCCCAAGAGAGGAAAAGACAGATATTGTGTACAAGATTACGTGCACAGGCTGTAAAAAAAATTATGTTGGGAAAGCTGGCAGAACTCTTAATGAGCGTTTAAAGGAACACAAAAGAGCCCTCTGATTGAGCAACCCATCCCATTCAGCATTAGTTGAACACGCCCTCAACACAGGACATAACATTGGATGGGAGGATGCCCTCATAACAGACTTTGAAAGTAACTTCTGGGCAAGAAAGGTGAAAGGTGAGTCCATAAAGGATTAAGAGAATTAAGCCATTACTAAACAGGGACTCTGTGTACCTATTGTTACCAATCTTTGGTCCAGTGATCACAGGACACAAGGCAGTGCAGCGAAAAAAAACGGGTGACTCG…	19579	NW_022145594.1:11395230-11395857	NW_022145594.1	11395230	11395857	LOC115920914	1526	gccctgcaaggtcactggacaggtggttatctcatcaactcagctctcagttaacataagaaaaagaggatcatgggggaccaatggtcaccgattaggcattgtttgttatatagagggcgcaagtagctacaagtagtgcagtgggcctttaagctTCTCCAACCTTACATTTGTTATGTAAGCTTTCGGCCGCTCCTGTGAACTTTCTCAAGCTAAGTGATCAGTCCGAGTCACACTCGCTGCACTGCCTTGTGTCCTGTGATCACTGGACCAAAGATTGGTAACAATAGGTACACAGAGTCCCTGTTTAGTAATGGCTTAATTCTCTTAATCCATATGGACTCACCTTTCACCTTTCACCTTTCTTGCCCAGAAGTTACTTTCAAAGTCTATTAT…
Scaffold1012:20321-20552	Scaffold1012	20321	20552	WHL22.8014	SPU_012792	ACTAACTTAGGTTTCAAGGGATATTTCCAAACCTACTTATGTATTTTGCCTACTTATCCGGCCATTAATGCATAAAAAGCTGCCCATGAATAGCCCTATTGTGAGAAGAATTCTTGGGAAACGTGTCATGTTTTTGTGGAAGATCGAACGCTTTCCTTGAGTGCTTATATCAGTAGCCTCTAAGTATTGGAAGATATGAGGAAAATACTATACTTTCACGACAACAGAGAT	1432	NW_022145594.1:11356828-11357059	NW_022145594.1	11356828	11357059	LOC105441278	12303	atctctgttgtCGTGAAAGTATAGTATTTTCCTCATATCTTCCAATACTTAGAGGCTACTGATATAAGCACTCAAGGAAAGCGTTCGATCTTCCACAAAAACATGACACGTTTCCCAAGAATTCTTCTCACAATAGGGCTATTCATGGGCAGCTTTTTATGCATTAATGGCCGGATAAGTAGGCAAAATACATAAGTAGGTTTGGAAATATCCCTTGAAACCTAAGTTAGT
Scaffold1012:229642-229864	Scaffold1012	229642	229864	WHL22.6721	SPU_027834	CTGGATAGAGATCAAACCATTAGAAAATTAGATCTATCCAATATTAAAACAAAAACAAATAAACATGTAGGCCTACATTAATAAAAAATAAAAAAAAGAAAAACTGTGCGCCATCTACACGTTCGTAATGGCGTTATCACAGTTTTTCCTTCATAATCATTTTGCCTTCGGCGTAGACTAGAAGGGATAAGATTGACTGCAGCGAGAGTTTAACACGGCTTG	0	NW_022145566.1:1356734-1356735	NW_022145566.1	1356734	1356735	LOC115929140	5357	c
Scaffold1012:4115-4532	Scaffold1012	4115	4532	WHL22.8014	SPU_012792	TAGTAGGGGCATTAATTAGATGTAAGGAGGAGCAGTTTGAAAATGGAAAGGGGTTCAAATGAGATCCAGTGCTTTGAGTATTTTAATAGAATGGATAATGGCGCTATATAAATCTGGCACTGGGACTTGTTAATCAACTCTGCGAACTCTTTGGATGAAGAAGCAACTATATTGTCTCCGACTACGTCAGTTCTGCATTGAATTGACAACCCACACAGACTCGTTAAAGTGTATCCTAACAATAAGCCGTGGGTGAATAAAGAGCTTCGCGATCTGCTCAGAGAAAAAGGAGCAGTACTATTAGCTGGAAACCCTGAGTCACTGAAGGATATCCAAAGAAAATTCAAGCGTCAGACGGGAAAATGTAAACATTCCTACAAGGTAAAGATTGAACAGAAC…	17452	NW_022145594.1:11393117-11393534	NW_022145594.1	11393117	11393534	LOC115920914	3849	GGGATAATTTTCGCGGAAGTTCTGTTCAATCTTTACCTTGTAGGAATGTTTACATTTTCCCGTCTGACGCTTGAATTTTCTTTGGATATCCTTCAGTGACTCAGGGTTTCCAGCTAATAGTACTGCTCCTTTTTCTCTGAGCAGATCGCGAAGCTCTTTATTCACCCACGGCTTATTGTTAGGATACACTTTAACGAGTCTGTGTGGGTTGTCAATTCAATGCAGAACTGACGTAGTCGGAGACAATATAGTTGCTTCTTCATCCAAAGAGTTCGCAGAGTTGATTAACAAGTCCCAGTGccagatttatatagcgccattatccattctATTAAAATACTCAAAGCACTGGATCTCATTTGAACCCCTTTCCATTTTCAAACTGCTCCTCCTTACATC…
Scaffold1012:58224-58466	Scaffold1012	58224	58466	WHL22.8014	SPU_012792	CGCCCTCTTAAAGGGGAAGTCAACCCAGATATCAAATTGGTTTTAGTAGAACCAGAAATACCATTTGCTCTGTACTAAAAACAAACAAACATAATTTTGTATTTTCCCTCAAGGAAATTATAATTCATACATGCACCCTTGATATAGTCATTTAAAATGTATTTCTATTTAAAACTCCTGTATGGGAAAAAAAAATCTATTCCGTCATAAGTAACCGTGCAAGAAAATGGAAGTTTATGTAG	0	NW_022145594.1:11338197-11338439	NW_022145594.1	11338197	11338439	LOC586872	12177	CTACATAAACTTCCATTTTCTTGCACGGTTActtatgacggaatagatttttttttcccatacAGGAGttttaaatagaaatacattttaaatgacTATATCAAGGGTGCATGTATGAATTATAATTTCCTTGagggaaaatacaaaattatgtttgtttgtttttagtacagagcaaatggtaTTTCTGGTTCTACTAAAACCAATTTGATATCTGggttgacttcccctttaagaggGCG
Scaffold1013:117384-117728	Scaffold1013	117384	117728	WHL22.8481	SPU_002105	CAGAACATAAACAAAACTACCTGATTCTTTATTACTGTTCTACTCAGTTGGTCACCCGCGTGACACTTTGTAAATTATTAAGGAAACAGTGTTTGCATAACACTCCAGCATGCACTGAGCACCTTCATTCAGTAAAGAAAGAGGATTTAAGCTGCTTAAGTACCTTCTGTTACAATTCAAGGAATATTCCCACTGGACTTATAGTTAAGTGATGTACAACCCTACCTCTTAAGTACGATTCAGTGTTGAAAGGGAGTGTTGCAGTGTTTTGTCATTGTATCATTTACCTCTTCAATACTAAGCCCAAAACAGCTAGGACTGGAGACTAAAAAAACAGGATATAG	0	NW_022145612.1:39266689-39267033	NW_022145612.1	39266689	39267033	LOC115917911	27651	CTATATCATGTTTTTTTAGTCTCCAGTCCTAGCTGTTTTGGGCTTAGTATTGAAGAGGTAAATGATACAATGACAAAACACTGCAACACTCCCTTTCAACACTGAATCATACTTAAGAGGTAGGGTTGTGCATCACTTAACTATAAGTCCAGTGGGAATATTCCTTGAATCGTAACAGAAGGTACTTAAGCAGCTTAAATCCTCTTTCTTTACTGAATGAAGGTGCTCAGTGCATGCTGGAGTGTTATGCAAACACTGTTTCCTTAATAATTTACAAAGTGTCGCGCGGGTGACCAACTGAGTAGAACAGTAATAAAGAATCAGGTAGTTTTGTTTATGTTCTG
Scaffold1013:118080-118346	Scaffold1013	118080	118346	WHL22.8481	SPU_002105	AAAGTACGGATGGCAGTAGAAACAGACTCATACTTGTAGTACCTTCAAGAGGCTAATGCATGTGATAGTGGGTGGCGGCTTTATTCAGTCCACAGAACAACAAGAAGGGTAATGACATAAAAGAGAAGTGGAATAAGTGTGTGTGGGTGTAACGGATTACAACTGGGACACACAGAGATTATCTCTTTTATACAGTTTTATTGTACCTGCTGGTATCGTCAGTAAAATCCCCTCTCCCTCTATATACCATCCCCCTCAAAGAAGAT	0	NW_022145612.1:39266071-39266337	NW_022145612.1	39266071	39266337	LOC115917911	27033	ATCTTCTTTGAGGGGGATGgtatatagagggagaggggattTTACTGACGATACCAGCAGGTACAATAAAACTGTATAAAAGAGATAATCTCTGTGTGTCCCAGTTGTAATCCGTTACACCCACACACACTTATTCCACTTCTCTTTTATGTCATTACCCTTCTTGTTGTTCTGTGGACTGAATAAAGCCGCCACCCACTATCACATGCATTAGCCTCTTGAAGGTACTACAAGTATGAGTCTGTTTCTACTGCCATCCGTACTTT
Scaffold1013:134060-134536	Scaffold1013	134060	134536	WHL22.8481	SPU_002105	TATACATTCCATTTGTTGAAAGAGATACACCTAGCGACATCAAAAAGGTAATTGGCATATGTCATCATCGATTAGACACGTGATATCTGTTTGGAAAGTGATCCATGGCCCGGTTGACGTCGAAATTGTTGTCTTGCAGCGTTTAATGAAAGACTAGTCTAATTAGGAGCAATATATAGAAGGCAATAACCTGATGATAGCAATGCGGATGGGGTGACGGCAAATGCTTCATTTTCAAAGAATACGGGCTTCAATCGATTTTGTTTTATATAGGGGGTTTTATGTTTCTATAATAGCTAATCCGCTTCCTACCGTGTTGGTGATGTTGTTCGACCTCCTACCTCGTATTCCTCCCTTCTTTTGTTCGTATACCTGCTACCCGTTTGCCATGGTTGATCC…	24	NW_022145612.1:39249371-39249847	NW_022145612.1	39249371	39249847	LOC115917911	10333	aaaatgctcTCTTGCGAATATTGGAGGTGTCGAACTGTGAAAGAGGAGAAAGATTGAATAATTTAAGGATCAACCGGGGATCAACCATGGCAAACGGGTAGCAGGTATACGAACAAAAGAAGGGAGGAATACGAGGTAGGAGGTCGAACAACATCACCAACACGGTAGGAAGCGGATTAGCTATTATAGAAACATAAAACCCcctatataaaacaaaatcgaTTGAAGCCcgtattctttgaaaatgaaGCATTTGCCGTCACCCCATCCGCATTGCTATCATCAGGTTATTGCCTTCTATATATTGCTCCTAATTAGACTAGTCTTTCATTAAACGCTGCAAGACAACAATTTCGACGTCAACCGGGCCATGGATCACTTTCCAAACAGATATCACGT…
Scaffold1013:173926-173934	Scaffold1013	173926	173934	WHL22.6961	SPU_000879	GTGTGAAA	0	NW_022145612.1:39217707-39217715	NW_022145612.1	39217707	39217715	LOC586652	0	tttcacac
Scaffold1013:199050-199270	Scaffold1013	199050	199270	WHL22.7062	SPU_005852	CCCAGTCTTGGTAAAGTTACAAGCACTGTACACAGAAAGATGTATATGGGACCACGCGACATGTGCGCGATATCTATCAGGTCCAAATTTTTTTGAGAGGGGGGCATTTCCAAAACTGATCTTTACCTTAAAACATGGATGAATTATGTGAGAATTAAGTTATTTCTACAAGTGTATCAGTAGATCTCTTGATGGGAGAGGCTTTTTTTGCTGTATCTTT	0	NW_022145612.1:39192126-39192346	NW_022145612.1	39192126	39192346	LOC115919533	0	AAAGATACAGCAAAAAAAGCCTCTCCCATCAAGAGATCTACTGATACACTTGTAGAAATAACTTAATTGTCACATAATTCATCCATGTTttaaggtaaagatcagttttggaaatgcccccctctcaaaaaaatttggacctgatagatatcgcgcacatGTCGcgtggtcccatatacatctttctgtgtacagtgcttgtaactttaccaagactggg
Scaffold1014:128086-128402	Scaffold1014	128086	128402	WHL22.11441	SPU_001344	TCAACCCATCGTGACTGCACTCTCCTAGATCAGTATCCGGTCCACTGCTGTGGATAATGATCCAGGAATAAATTGCCTCTGCCTTCGCTTTACTTTACATAATCCGTATGAGTACAAGAATAATATCTCACCATTAGCGCAGACAGCACCAGCGTCTTCGCTGTGTACACAATTATGAATCTCATATCCATTGTGGGAGCATTCAGCAAGGTTGCGTTCTGTCCCAAGGCATTCGACGTCATCAAGAATGATGCTTCCAGAACCTTCACCGTATCCAGCACTTGAGACTGCTCTCATTGCGGTCTGAAAGCCAAGC	25979	NW_022145594.1:47730089-47730405	NW_022145594.1	47730089	47730405	LOC592954	0	GCTTGGCTTTCAGACCGCAATGAGAGCAGTCTCAAGTGCTGGATACGGTGAAGGTTCTGGAAGCATCATTCTTGATGACGTCGAATGCCTTGGGACAGAACGCAACCTTGCTGAATGCTCCCACAATGGATATGAGATTCATAATTGTGTACACAGCGAAGACGCTGGTGCTGTCTGCGCTAATGGTGAGATATTATTCTTGTACTCATACGGATTATGTAAAGTAAAGCGAAGGCAGAGGCAATTTATTCCTGGATCATTATCCACAGCAGTGGACCGGATACTGATCTAGGAGAGTGCAGTCACGATGGGTTGA
Scaffold1015:335573-336271	Scaffold1015	335573	336271	WHL22.7559	SPU_022236	GCATTCAGTGAATGAATAAACCGATATAAAACAACGACGTTTTTCAGGATAAGTCCATTTTTAAATAACTGTCATTTAGAACCAGTTTCCCCTCACCATGACTGAATATTTCAGGTTTGGCTCAACATAGCAGACGACGACGACGACACTCGTGCAAAATCCTATATTCGTCTTTATTCTATTACCTTCGCTAATAACGCTTTTGCGACAAACAAACTCAAATTTTGTTAACAGTACAGAAGAGTCGAGAACAATCTGGGATTTCCCCGTCAGTGTGAAAAGGCCCAGCTAGCCCTATTTAGAAGCCACGCCTTGTACCATGGACCCACACTGAAGAGCATGGACCAACACATTGGAAGCTTCTCCAATCTTTGGCGAAGCTGGCGTCTGTGCTGGCCT…	1465	NW_022145533.1:104305-104489	NW_022145533.1	104305	104489	LOC579685	335	TAATAGAATAAAGACGAATATAGGATTTTGCACGAgtgtcgtcgtcgtcgtctgCTATGTTGAGCCAAACCTGAAATATTCAGTCATGGTGAGGGGAAACTGGTTCTAAATGACAGTTATTTAAAAATGGACTTATCCTGAAAAACGTCGTTGTTTTATATCGGTTTATTCATTCACTGAATGC
Scaffold1015:350984-351293	Scaffold1015	350984	351293	WHL22.7592	SPU_002153	AAATCGTAGAAATTATAAGTTCAAAGTTTGTATCAGTATTAGGAGGCCATCCATTGTATTGCATTATATCTCTGATTTTTTTCAGGAATTTCCAGCTGTTATTGTGCTAAACATTAATTAACACAGCTTAGTTTTACTACTAATTTGAGCATTTAGGAACGTTTGTGCACCAAAATTTAATAAACAGAAAAATTGTTAGTTGTATTGAATATGTGGCATTTTATTTATACGTATATTTTACAATCTAATGCCTATCTTAATTCACTTTTAATATAGCTTTCGGAGATAGTCAAGTCTACTTTGGGCTCT	0	NW_022145609.1:26053683-26053992	NW_022145609.1	26053683	26053992	LOC576023	0	AAATCGTAGAAATTATAAGTTCAAAGTTTGTATCAGTATTAGGAGGCCATCCATTGTATTGCATTATATCTCTGATTTTTTTCAGGAATTTCCAGCTGTTATTGTGCTAAACATTAATTAACACAGCTTAGTTTTACTACTAATTTGAGCATTTAGGAACGTTTGTGCaccaaaatttaataaacagaAAAATTGTTAGTTGTATTGAATATGTGGCATTTTATTTATACGTATATTTTACAATCTAATGCCTATCTTAATTCACTTTTAATATAGCTTTCGGAGATAGTCAAGTCTACTTTGGGCTCT
Scaffold1015:369288-369663	Scaffold1015	369288	369663	WHL22.7623	SPU_002147	TGTTGGTTTACTCAGTGTTTTACTGCACTCTGTCTTTAAAGAAAAGGTGAACACCTTTCCTTTCATTTGCAACAATACCAAAAGTGCAGCGCTTTACTTTATATGGGCCTTTTATGTTATGTGAGAGGGAATAATAGAAACAAATCCCCCAATTAAGTCAAGTCCTGACTAGCCAAGCTCCTTGATTATTCCTTTTATTTACTGATTTCAATGGACAGGAAATTCATTAATTTGCCATCCTGACCTTCATTGTGTTTATATAAATAAAGCCTTTACTATAGGCTTATAATATATACAGCTACCATTTTGTGAGTACCATTGTAGTGTATGCGCACTAGCTCTACATAACATGTGTTGGTAAGTATACCAAGAGTT	0	NW_022145533.1:56153-56528	NW_022145533.1	56153	56528	LOC100888121	0	AACTCTTGGTATACTTACCAACACATGTTATGTAGAGCTAGTGCGCATACACTACAATGGTACTCACAAAATGGTAGCTGTATATATTATAAGCCTATAGTAAAGGCTTTATTTATATAAACACAATGAAGGTCAGGATGGCAAATTAATGAATTTCCTGTCCATtgaaatcagtaaataaaaGGAATAATCAAGGAGCTTGGCTAGTCAGGACTTGACTTAATTGGGGGATTTGTTTCTATTATTCCCTCTCACATAACATAAAAGGCCCATATAAAGTAAAGCGCTGCACTTTTGGTATTGTTGCAAATGAAAGGAAAGGTGTTCACCTTTTCTTTAAAGACAGAGTGCAGTAAAACACTGAGTAAACCAACA
Scaffold1015:382373-382747	Scaffold1015	382373	382747	WHL22.7623	SPU_002147	TCTAAATATCCACATCACCCAGTCTATCTGTAGTCAATAACATATGAGGAAAAAAAGGGGTTCAAGTTTAAAGCAAAGTTTTACTCAATCTTAATTTGCCTTTCATATATTTTCTAGGGTTGAATTTATGAACAAATATGACATGTATATATGTATATAGTATATATGTCTCATCTTGAGCACTGTTGACAAACTTTCAAATAAAGTGGAATATTTAGTGATTTACCGCAGTGAACATTCCTACAATGCACGAGGCCCAACCTGTACGGTATACCTAGTACTACTAGTACCAGTGGCATACGCAGGATTTCTTCAAGGAGGGTGTTTGTTTTTCTGAGACATTACGGTAAATAACTTCACACAGGCGCGCGCCC	0	NW_022145533.1:48407-48786	NW_022145533.1	48407	48786	LOC100888121	0	gggcgcgcgcctgtgtgaagttatctaccgtaatgtctcagaAAAACAAACACTCTCCTTGAAGAAaacctgcgtacgccactggtacTAGTAGTACTAGGTATACCATACAGGTTAGGCCTCGTGCATTGTAGGAATGTTCACTGCGGTAAATCACTAAATGTTCCACTTTATTTGAAAGTTTGTCAACAGTGCTCAAGATGAGACATATAtactatatacatatatacatgtacatgtcatatttgtttataaattcaaccctagaaaatatatgaaaggCAAATTAAGATTGAGTAAAAGTTTGCTTTAAACTTGAAccctttttttcctcatttgtTATTGACTACAGATAGACTGGGTGATGTGGATAATTAGA
Scaffold1015:389127-389473	Scaffold1015	389127	389473	WHL22.7623	SPU_002147	GGTCATTTTGGTCGATGTCACTGCCCTCGCACATAGATGCTCAAGGATTTACCAACACCAAAATGCATTCAGGCTATACTTGGAATACGAACAATACCGCTCTTCAGTCAACGTGTTTATATAGAAGTGCACTGACAGCCGATCCTGAAAGAATGACCTAAATTTAACACAGAGGCCTTGGATTCTAACCGCTAAATAATACCATAATCGATACTTTTCGCAGAAAGCGGACTGGCGCCATCACTTGGCGACGTGGGTTCATGACACGGCATTAGTCTTTGTCGGATACTCTTTTTAATCAATTTTGGAATGCTTAGAGAAATGAAGGGGATGAGAAGAAATAGAT	4906	NW_022145533.1:41894-42240	NW_022145533.1	41894	42240	LOC100888121	4950	ATCTATTTCTTCTCATCCCCTTCATTTCTCTAAGCATtccaaaattgattaaaaagagTATCCGACAAAGACTAATGCCGTGTCATGAACCCACGTCGCCAAGTGATGGCGCCAGTCCGCTTTCTGCGAAAAGTATCGATTATGGTATTATTTAGCGGTTAGAATCCAAGGCCTCTGTGTTAAATTTAGGTCATTCTTTCAGGATCGGCTGTCAGTGCACTTCTATATAAACACGTTGACTGAAGAGCGGTATTGTTCGTATTCCAAGTATAGCCTGAATGCATTTTGGTGGCGGTAAATCCTTGAGCATCTATGTGCGAGGGCAGTGACATCGACCAAAATGACC
Scaffold1015:390081-390104	Scaffold1015	390081	390104	WHL22.7623	SPU_002147	GAGAGAACTGAGATTAAGTTTCA	5860	NW_022145533.1:41263-41286	NW_022145533.1	41263	41286	LOC100888121	5904	TGAAACTTAATCTCAGTTCTCTC
Scaffold1015:391021-391172	Scaffold1015	391021	391172	WHL22.7623	SPU_002147	ATATAGTTCGCGCATTTATTTTATATCCAGGTACCAGAATGTATTGTGTATCAAACAGGTGGTTTCCATGGAAACAGAACGTATCGCGTTACAGTTTAGTGCCAGGTCAACCGGTTAGTTCACTTTCATTGCTCTGACCTATTTCACGGAG	6800	NW_022145533.1:40195-40346	NW_022145533.1	40195	40346	LOC100888121	6844	CTCCGTGAAATAGGTCAGAGCAATGAAAGTGAACTAACCGGTTGACCTGGCACTAAACTGTAACGCGATACGTTCTGTTTCCATGGAAACCACCTGTTTGATACACAATACATTCTGGTACCTGGATATAAAATAAATGCGCGAACTATAT
Scaffold1015:392022-392281	Scaffold1015	392022	392281	WHL22.7623	SPU_002147	AAAATGTGGTAAGGGGGGGGGGGGGGTGACTGAGGTCATAATTCTATTTTTAAATCCGTGCAACATACATGTTATACTGATTATAGCATTCTTACATCGGCATCAGTTTTTGACAATATTTCGATGTATTGTGTCGATGAAATTATACACCTGTTGTACTGTTGATTCCTTTGAGCATTATTATAATTCTGAATAATGATCTAGTCTGCATACAGCCTTATAGCCTATATATTGAAGCCATAAGTTGAATAGAAATCTC	7801	NW_022145609.1:26086450-26086451	NW_022145609.1	26086450	26086451	LOC115918965	8143	A
Scaffold1015:392627-392855	Scaffold1015	392627	392855	WHL22.7623	SPU_002147	ACAAGACAGAATACCACCTCAGCTTAATATTCTTATACATTGTAGTTATACAGTATACTTTGTGGTGATAAAAGGAAAAGAAATCACACTAGTAGATTCGGTTTTGTTTTGGATATAAATGTCACTCATCCCTATAAATAGATCACGTGTGATACATTTTACAGATTCCACTGGTTTCCGATTCCACGCTAACCGATGTTTTGATGATACGATTTGAGGTTACATCTT	8406	NW_022145609.1:26087055-26087283	NW_022145609.1	26087055	26087283	LOC588294	7918	ACAAGACAGAATACCACCTCAGCTTAATATTCTTATACATTGTAGTTATACAGTATACTTTGTGGtgataaaaggaaaagaaatcaCACTAGTAGATTCGGTTTTGTTTTGGATATAAATGTCACTCATCCCTATAAATAGATCACGTGTGATACATTTTACAGATTCCACTGGTTTCCGATTCCACGCTAACCGATGTTTTGATGATACGATTTGAGGTTACATCTT
Scaffold1015:399951-400121	Scaffold1015	399951	400121	WHL22.7623	SPU_002147	ACCACCTGTCCCTGGGGGAATTGCATTACCCCCTTCAATATCGTGAACTCCTAATTATTTCGAGTGCTTTCTGCACGCATAATGCATCGAAAATGTGTATTATGTGTGTCTCGTCTTCAATTTTAAACATACCCCACACATATAAATGGGTGCAATATACTCAGAAGCTA	15730	NW_022145533.1:34724-34894	NW_022145533.1	34724	34894	LOC115918562	5121	TAGCTTCTGAGTATATTGCACCCATTTATATGTGTGGGGTATGTTTAAAATTGAAGACGAGACACACATAATACACATTTTCGATGCATTATGCGTGCAGAAAGCACTCGAAATAATTAGGAGTTCACGATATTGAAGGGGGTAATGCAATTCCCCCAGGGACAGGTGGT
Scaffold1015:55517-55818	Scaffold1015	55517	55818	WHL22.7154	SPU_021860	CATTGCTAACAAAAATTATAAGAACTGCAGTTGAAATTAAGAAGTTGATTTCAATTTGTTATAAGTTTTGAGAGTTGTATGTTCTTCAAGTTTGCCATACCATCACACTGAAGTACATGACCTATGACATCATCATTGTAAACACAAAAAAACACTCTCGTTTGTTTGAAATATTTTTATTTAAAATCGTCCCTTCCTGTAAGAAAGGAGAAAAATAAGGCAAGTAAAAACATCATTCCAGATAGATGGAAAACATGGTTACAATCATATGACATTCTGGTCAATCATTGGGCGTGGAAAG	1346	NW_022145611.1:18324731-18325032	NW_022145611.1	18324731	18325032	LOC752039	1350	CATTGCtaacaaaaattataagaaCTGCAGTTGAAATTAAGAAGttgatttcaatttgttataAGTTTTGAGAGTTGTATGTTCTTCAAGTTTGCCATACCATCACACTGAAGTACATGACCTATGACATCATCATTGTAAACACAAAAAAACACTCTcgtttgtttgaaatatttttatttaaaatcgtCCCTTCCTGtaagaaaggagaaaaataagGCAAGTAAAAACATCATTCCAGATAGATGGAAAACATGGTTACAATCATATGACATTCTGGTCAATCATTGGGCGTGGAAAG
Scaffold1015:81440-81824	Scaffold1015	81440	81824	WHL22.7154	SPU_021860	ACCCTACAGACTCCATCACCACCTGTCAGCAAGACCCGCAATCCCGGGCCCCGCCTCCTCTCTGCCCTCATCTCTCAGGATTCCACCACCATAACCATCAAGAGAGACAATGGGAAGTAATCTAGACACTTCTCTTCTTTCTCTCATGAGCAGGACAGAGAATAATGCTCCCACAACTCCAAAAGCCGCCTAAGACTTGGCATGATTTTTGATGGTAAGAAAAATCAAAAGAAATCAGAAAAAAAATTACTCTAAATTTTATCTCTGACACCCCAATTGCAATGGGTTTATCCTTGTATATTTCTTTATATTTTCTACTTTCATCTTCTCTTTCTGTCATTTTTCTAAAATTACATTTTTTCTCCTTTTACTGTCTTTCATCCG	27269	NW_022145611.1:18350645-18351029	NW_022145611.1	18350645	18351029	LOC752039	27264	ACCCTACAGACTCCATCACCACCTGTCAGCAAGACCCGCAATCCCGGGCCCCGCCTCCTCTCTGCCCTCATCTCTCAGGATTCCACCACCATAACCATCAAGAGAGACAATGGGAAGTAATCTAGAcacttctcttctttctctcatgagcAGGACAGAGAATAATGCTCCCACAACTCCAAAAGCCGCCTAAGACTTGGCATGATTTTTGATGGtaagaaaaatcaaaagaaatcagaaaaaaaattactctaaaTTTTATCTCTGACACCCCAATTGCAATGGGTTTATCcttgtatatttctttatattttctactttcatcttctctttctgtcatttttctaaaattacattttttctccttttacTGTCTTTCATCCG
Scaffold1016:106598-106658	Scaffold1016	106598	106658	WHL22.7647	SPU_027485	ATTCGACAAAGCTTTAATTTGTCCTTTGCCTTTTCTTTGAGATTGGTTAGACTCGCTTTA	24123	N/A	N/A	N/A	N/A	N/A	N/A	N/A
Scaffold1016:89117-89480	Scaffold1016	89117	89480	WHL22.7647	SPU_027485	GGGCAGGGTTGAGTGATGATGTGACCTGATGATAGTACACCACGCATCTTTATATCCACAAAACCTGTGATGGTATTCATGATCTTACCATCAGCTGGGTTGATGACGTATATCTTAGACTGACCTCCCTCAGCAACGATGATTATCCCATCCTGGTCAACAGCTAGATCCACCCAAGTGTCATCACGCGGTGTGTTTCTCGGTATTGTGACGTCATTGATGCGCTTCCATTGTCTGTCATACACACCAATGCATCCAGTCAAGCTGTCCCCTGAACACTCTTCACATCCTTTACCGCATACTACTTTGTCATCATTCAGCAATGCACAGGAGGTAGCCCATGATGTATCACTATCTGTTATC	41301	N/A	N/A	N/A	N/A	N/A	N/A	N/A
Scaffold1019:173730-174118	Scaffold1019	173730	174118	WHL22.9804	SPU_024785	ACAGGACATTCGAGTACAACATACTGCGTGATGGCGCCTCGGTGTCTTGTCACGTGGTATTATCTTGATGTTGAGCTGGTGTTGATCTAGCCTATCCAATATGCATCGGGCTTTAAGGCATATATACTCTCTCGTTATGTCTCCATAACGCGATTAGTACTTGCCTGGACCCGACGCATAGCGGATAGGCTATATAGTGTTTAGCTGGATGGCGTCACAACTCATGTGAAGACAACTCGATGACGTCATTATAGATAAGTTAATAACGCTAAGTGATAATGCAGCGTGGATGATTCGAGAAGGGGATTGAACACGTTGCGATAAATCACAAGAGGATTTTTGAGCAGCACGACAGTTTTCATTTCCAGTTGTCCCCAAAAAGCACTTC	2262	NW_022145595.1:27769538-27769945	NW_022145595.1	27769538	27769945	LOC115921607	0	AGAGGACTTTCGAGTACAATATACTCCGTGATGGCGCCTCGGTGTCATGTCACGTGGTATTATCTTGATGTTGAGCTGGTGTTGAGCTAGCCTATCCAATATGCATCGGGCTTTAAGGCATATATACTCTCACGTTATAGGGACAGACATCGGCGATGTCTGTCTCCATAACGCGATTAGTACTTGCCTGGACCCGACGCATAGCGGATAGGCTAGTGTTTAGCTGGATGGCGTCACAACTCATGTGAAGACAACTCGATGACGTCATTATAGATAAGTTAATAACGCTAAGTGATAATGCAGCGTGGATGATTCGAGAAGGGGATTGAACACGTTGCGATAAATCACAAGAGGATTTTTGAGCAGCACGACAGTTTTCATTTCCAGTTGTCCCCAAAA…
Scaffold1019:28116-28197	Scaffold1019	28116	28197	WHL22.8022	SPU_022117	TTATTATTCATCCATTTCTAGATGATCCAGACAGTCAGTTCTTGATGGATAACATGCAAGAAGGGCTGACATGCTGTGGTG	0	NW_022145595.1:27638401-27638482	NW_022145595.1	27638401	27638482	LOC582219	0	TTATTATTCATCCATTTCTAGATGATCCAGACAGTCAGTTCTTGATGGATAACATGCAAGAAGGGCTGACATGCTGTGGTG
Scaffold1019:65802-65909	Scaffold1019	65802	65909	WHL22.9704	SPU_003741	AACCTATTTACACCCACATGTTCTAGTCTAAACATTATGACAGTAAAAATAAGTGATCTTTTGAATACCAGTAGCTGTTTCAATGCTGTGATAAAAACCAAAAGGGG	9140	NW_022145595.1:12302689-12302794	NW_022145595.1	12302689	12302794	LOC100887941	3825	CCCCTTTTTGGTTTACCACATCGTTGAAAAAGATATTGGTATTCAATAGATCACTTATCTTTACTGTCATAATTTTAGACTAGAACATGTGGGTGTAAATAGGTT
Scaffold1019:90692-90798	Scaffold1019	90692	90798	WHL22.9704	SPU_003741	AAAGACACAGAAGGAATGTGACCTATTAAATGATGCGTGACTCGTTAGTTGCATGGAGATCCACGATCATAAACAAAACCTTCTGCTTTACGGAGTTCCTTAGAGC	0	NW_022145595.1:27696119-27696225	NW_022145595.1	27696119	27696225	LOC100889289	585	AAAGACACAGAAGGAATGTGACCTATTAAATGATGCGTGACTCGTTAGTTGCATGGAGATCCACGATCATAAACAAAACCTTCTGCTTTACGGAGTTCCTTAGAGC
Scaffold102:144717-145075	Scaffold102	144717	145075	WHL22.10149	SPU_003133	CTGAGAGAATGTAAATTAACAAATATAATTCGAGTATCATACAAATGATATATAAGCCCCGCCCCCTTCAGATGACCTTATCAGAATCTTGAGTGTAGACTATCCCATCCCCTTTGCTCTTTTCTCTCTGTTGCTGTCTGTATTCTCTCTGTTCATCTCTCCCTCTCTGTCTCTGCAAAGTCAACACAAAAAGACAATCCAAAGTATCCAAACAAAGTCCACCCCCCCCTCAAAAAAGGGGTTGTTTTGAGGAGATTTGATTACAGATTTTGAATACTTGTAATGATTAAATTTGACAATGGGAATGCATAGGGGAGGATATATCCTTACTCCGAACTACAACCCGGTGCATTCTCCC	0	NW_022145595.1:3254131-3254474	NW_022145595.1	3254131	3254474	LOC579411	1606	ggagaatgcaCCGGGTTGTAGTTCGGAGTAAGGATCCTCCCCTATGCATTCCCATTGTCAAATTTAATCATTACAAGTATTCAAAATCTGTAATAAAATCTCCTAAAAACTGACAACCCCTTtttttgaggggaggggggttgatTTTGTTTGGAGACTATGGATTGTCTTTTTGTGTTGACTTtgcagagatagagagggagagatgaacAGAGAGAATAGAGACAGCAACAGAGAGAAGAGCAAAGGGGATGGGATAGTCTGATACGGTCATCTGAAGGGGGTGGGGCTTATATCATTTGTATGATACTCTAATTATCTTTGTTAATTTACATTCTCTCAG
Scaffold102:146650-147028	Scaffold102	146650	147028	WHL22.10149	SPU_003133	CCAACAATAGCAGGGCGCATGCATTAAAGGAAAGTGTTCCGGAAGACGCGCGCGTTTGATGTCGTCACAATAACTGATCAATTAGACACTGACCAATGGCTGTACTCCATTTTCAACAATAGTATTGCGCATGCGTTTGAGTTAATTGGACCAGTTAAGCTGAGAGTAGATCAGACTCCCATTAGTCAATTCAAAACAATAAGCAGAAACATGTGCGCCTCTTAGTTTGTACATATACAAACAAAAACTCTCTTCATGGAAACAATACAGGAGGGACTAATATATTTAAGTTCAGGCTTAGAATAATTAACAGGCTATTTCTGCAGTGGAACATGAAGAAGCACAAAAAAAGTTCCATGTAAGAATTGAAATTGAAAC	1917	NW_022145595.1:3251454-3251829	NW_022145595.1	3251454	3251829	LOC579411	4251	gtttcaatttcaattcgtACATGGAACTTTTGTTGTGCTTCTTCATGTTCCACTGCGGAAATAGCCTGGTAATTATTCTAAACCTGAACTGTTACAACTCCCTCTTGTGTTCTTTCCATAAAGagagtttttgtttgtatgtacaaAACTAAGAGGCGGGTCTGTTTCCTGCTCATTGTTTTGTAATAACTATTAGGAGTCTGATCTAATCTCAGTTTAACTGGTCTATTATAACTCAAACGCATGCACgatacttttgttgaaaatggagTACAGCCATTGGTCAGTGTCTAATTGATCAGTTATTGTGACGACATCAAACGCGCGCGTCTTCCGGAACACTTTCCTTTAATGCATGCGCTCTGCTATTGTTGG
Scaffold102:148269-148693	Scaffold102	148269	148693	WHL22.10149	SPU_003133	CTTTTTGAATATGTTTTTTTACCGTCAAAATATAAAACCTATTTAAATGGAATTTTTTTAATCGATTATGTATGTGAAGATTGTAATACTATTGAAACATCACGGCATGTGGTGTTAGAGTGCAAACAGATAATTGTGTTTTGAACAATCACTTTTGATAATCATTTGTTCGGATTGATGTCGTCATAATATAGTTGAATGCCCAATGTCCAATCAGACACAGGCGAACGACCGAGCAACTTTCCAACAATAGCAGGGCGCATGCATTAAAGGAAAGTGTTCCGGAAGACGCGCGCGTTTGATGTCGTCACAATAACTGATCAATTAGCCACTGACCAATGGCTGTACTCCATTTTCAACAATACTATTGCCCATGTGTTTGAGTTAGACCAGTTAAAC…	3536	NW_022145595.1:3245452-3248883	NW_022145595.1	3245452	3248883	Wnt8	5622	AATGGGAGTCTGATCTACTCTCAGTTTCACTAGTTTATTATAACTCAAACGCATGCGACCTTCTATTGTTGAAAATGGAGTACAGCCATTGGTCGGTGTCTAATTGATCAGTTATTGTGACGACATCAAACGCGCGCGTCTTCCGGAACACTTTCCTTTAATGCATGCGCCATGCTATTGTTGGAAAGTTGCTCGATCATTTGTTTGTGTCTGATTGGACATTGGGCAATCaactattttaatttttttgtagcattgttttattgtattcattcagtacaaaatatataacaaacaaacatacagctTCTTTGATTTAcatatcatatcaaaatataaagaaaattgtaaatctctcaaaaaatacatagaatagtttaatacacagtacataatgtt…
Scaffold102:160247-160576	Scaffold102	160247	160576	WHL22.8218	SPU_020372	GCAAACAGATAATTGTGTTTTGGACAATCACGTTTGAAAATCATTTGTTCGAATTGATGTCGTCATAATAGTTGATTGCCCAATGTCTAATCAGACACAAGCGAATGACCGTGCAACTTTCCAACAATAGCAGGGCGCATGCATTAAAGGAAAGTGTTCCGGAAGACGCGCGCGTTTGATGTCGTCACAATGAATGATCAATCACTGACCAATGGCTGTACTCCATTTTCAACAATACTATTGCCCATGTGTTTGAGTTATAATAGACCAGTTAAACTGAGAATAGATCAGACTCCCATTATATTAGTTAATTCAAAACAATAAACAGG	12758	NW_022145595.1:3245452-3248883	NW_022145595.1	3245452	3248883	Wnt8	5622	AATGGGAGTCTGATCTACTCTCAGTTTCACTAGTTTATTATAACTCAAACGCATGCGACCTTCTATTGTTGAAAATGGAGTACAGCCATTGGTCGGTGTCTAATTGATCAGTTATTGTGACGACATCAAACGCGCGCGTCTTCCGGAACACTTTCCTTTAATGCATGCGCCATGCTATTGTTGGAAAGTTGCTCGATCATTTGTTTGTGTCTGATTGGACATTGGGCAATCaactattttaatttttttgtagcattgttttattgtattcattcagtacaaaatatataacaaacaaacatacagctTCTTTGATTTAcatatcatatcaaaatataaagaaaattgtaaatctctcaaaaaatacatagaatagtttaatacacagtacataatgtt…
Scaffold102:171287-171661	Scaffold102	171287	171661	WHL22.8218	SPU_020372	GCCATGCATAGAGTTTCAGCCCCTCCCCTCTTTTGTAAGAAAAAAAAAGGGGGGGGGGGGAGACGCGTGCTATGTGTCATGCCCCACCCCACCCATCTCCTTAATCAGCTCTCTACCCCAACTCCCATTTCCCATTCTCACATGGCAGCCTCGCTATTGGTGCGGTCTTTTCAAAGTTCCCTTTCACTTATGCTAAATTGACGACATCAAACACATGCGATGGTCTATTGTTCAAATACCTACCGGACCTGACAGGCTTGAACTTGAAAAGATGCCATTTTCTTAACTAAGTTATAGGGTGACTCATGCTCTTGATATGCTAATTTGTTAGCTATATACGAGTCGACGCCAGTTGAACTCGAACTCAAGTTGTC	1673	NW_022145595.1:3242565-3242647	NW_022145595.1	3242565	3242647	Wnt8	2735	ATATCAAGAGCATGAGTCATCCTTTAACTTAATTAGTAAGAAAATTGCATCTTTTCAAGTTCAAGCCTGTCAGGTCCGGTAG
Scaffold102:172328-172428	Scaffold102	172328	172428	WHL22.8218	SPU_020372	TTACATTAAACGTAATGTACAGTGATGACAAATTACTGAAAGACTTGAAAAGTTGTACAGTTGAACATTATACAACAATGAACGAGACATTATGGCATTG	906	NW_022145595.1:3241803-3241903	NW_022145595.1	3241803	3241903	Wnt8	1973	CAATGCCATAATATCTCGTTCGTTGTTTTATAATGTACAACTGTACAACTTTTTAAGCCTTTCAGTAATTTGTCATCACTGTACATTACGTTTAATATAA
Scaffold102:185363-185565	Scaffold102	185363	185565	WHL22.8378	SPU_007819	TTTGGAAAATGGAGGAAATCGGGAGAGGTAACTCGTTGTGAATCAACTGGAACATAAAAATACCGATGTACCAAGAATACGAGTCTTTAATTTTAAGAATTTTGTCTAGTAAAAATAAGTGGTTAGTGTGGGATCGAAAGTAGACATTATGAATTATTCTTAATGCACGCTTCTGTAAAATTAATATTCGGTCAGTTAGGGT	2615	NW_022145604.1:12581867-12582069	NW_022145604.1	12581867	12582069	LOC100891614	0	ACCCTAACTGACCGAATATTAATTTTACAGAAGCGTGCATTAAGAATAATTCATAATGTCTACTTTCGTTCCCACACTAACCACTTATTTTTACAAGACAAAATTCTTAAAATTAAAGACTCGTATTCTTGGTACCTCGGTATCTTTATGTTTCAGCCGATTAATAACGAGTTACCTCTCCCGATTTcctccatttttcaaa
Scaffold102:268752-268879	Scaffold102	268752	268879	WHL22.8502	SPU_007814	GCAATTAGTGACGTAATTAAGTGGTTCAAAGCGACAGAGGTCGCGCTTCGCTTCGAGATAGATAATTAGCGGCGTTGCTGCTTTTAATAAAAAACCTTCATTGAAAGCGCAAAAAATTCAGTCTCTT	1582	NW_022145595.1:3160489-3160616	NW_022145595.1	3160489	3160616	LOC581090	0	AAGAGACTGAATTTTTTGCGCTTTCAATGAAGGTTTTTTATTAAAAGCAGCAACGCCGCTAATTATCTATCTCGAAGCGAAGCGCGACCTCTGTCGCTTTGAACCACTTAATTACGTCACTAATTGC
Scaffold102:273877-274214	Scaffold102	273877	274214	WHL22.8502	SPU_007814	GGCACCATTTCCAAAGAAATAGACTCCCTCTGTGACGGCGATGCGTAAAGTCCGTTGCCGCTTTTCCGTGGTGTCTGCGATGTACGCATGCGCACCGGCAAAGAGGAGCGCAACCCCACCGGATATTCCCTGTAGGAGTTCAGCTATAAAGAATGTCCAAAGGGGTAAATGCGCGTATGCGATTATGAGAAATAATACACACTGGAGGATGTAACCAATACATGGAACCATCATGGCGACTTTCCGCCCGGCTAGATTGCTGATAGCGCCCACTACGATGGTCGTAAAAAGCGCGGGAAACGTGGACATGGCGTAAAGGTACAAACTCCAAACCGCT	0	NW_022145595.1:3155171-3155508	NW_022145595.1	3155171	3155508	LOC581090	0	AGCGGTTTGGAGTTTGTACCTTTACGCCATGTCCACGTTTCCCGCGCTTTTTACGACCATCGTAGTTGGCGCTATCAGCAATCTAGCCGGGCGGAAAGTCGCCATGATGGTTCCGTGTATTGGTTACATCCTCCAGTGTGTATTATTTCTCATAATCGCATACGCGCATTTACCCCTTTGGACATTCTTTATAGCTGAACTCCTACAGGGAATATCCGGTGGGGTTGCGCTCCTCTTTGCCGGTGCGCATGCGTACATCGCAGACACCACGGAAAAGCGGCAACGGACTTTACGCATCGCCGTCACAGAGGGAGTCTATTTCTTTGGAAATGGTGCC
Scaffold102:351149-351453	Scaffold102	351149	351453	WHL22.8502	SPU_007814	CGGACTTTTGTCGTCTGATTAATTTTCAGTCGGGAGAAGAGGAGTGGAATGCCATGGTTAAAAGAGATATACAGTTGGATAATAATTATGTCTGATTAGGCCGTTATTTAATTTAAAACCAATAATGGGCTCTCATGGTCATCGTGTACTGATATTTTACTCATACCTTTTTTCTGTTAATTAATGAAAGCTAAATAAGTATAATGCATTCGTATAACGTAAGGTAAGGAAGATCATTATCAGCATACGATCATCTCTTAACTGTAGTGCTCATCTATTCAATCACCTCCGTTCTACCGTTTTG	54921	NW_022145595.1:3083772-3084071	NW_022145595.1	3083772	3084071	LOC115921821	18479	CAAAACGGTAGAACGAAGGTGATTGAATAGATGAGCACTACAGTTAAGAGATGATCGTATGCTGATAATGATCTTCCTTACCTTACCTTATACGAATGCATTCAACTTATTAAGCTTTCCTTAATTAACAGAAAAAAGGTATGAGTAAAATATGAGTACACGATGACCATGAGAGCCCATTATTGGTTTTAAATTAATAACGGCCTAatcatacataattattatccaACTGTATATCTCTTTTCACGCATTCCACTCCTCTTCTCCCGACTGAAAATCAATCAGACGACAAAAGTCCG
Scaffold102:85691-85978	Scaffold102	85691	85978	WHL22.9532	SPU_003132	AATGAGCCCCTAAAAAACTTCTGTTTTCAAGAAAAATTGAATATAAAAATTTACCTGTGCTCCCGGTAAATGTTGATTAATTTCGAGAAGCACCTATGGCTGTACATTGGTAGCTGCAACCATGAAAATCTCAGAATATGTAGTTGGGATATATAATTTCCGAACGGGAATAGCTAATCGGTTAATTTTAGCAAAGAAACATTGTTTCATAGCTAAATTAATATCTTGACCTTGAGAGGGAGCTATACAACATAAAGAGTTTATTATTTATAATTTCATAACTTTCG	0	NW_022145612.1:28985604-28986115	NW_022145612.1	28985604	28986115	LOC100889954	933	atttagcccctaaaacacttctgctttcgagaaaaattaaatataaaaattttgataaatttcaaatagcgccttcGGCCGTaaaatagtagctgcgaccattaaaatctcagaatatgtagatgtgatatataatttccaacgGGAATAGCTAAATAGCTTTATAGctcaattaatatcttgaccttgagagggagctatacaacaaagagtttattatttacaatacaccagtttacagttgtgtgcgccattttaaacaaagccaatgacctagaggtcatgtatttatgcgtaaattaagattgcgcccatgcaaattttgatgatatcactgcctacgcgctgcgttgtgcgcgcacatcattatttgcatgggcgcaatcttaatttacgcat…
Scaffold1020:155077-155193	Scaffold1020	155077	155193	WHL22.8926	SPU_008128	CCCTGATAAAGATAGTCATTCCTTTGGCTATTTTTTACTTCTAATACATTTCAAGTAACTGGTTTGCTCGATAATGTTGAAATCATTTTGTCAAGCATTTTTAATCATTTTTTCAA	35388	NW_022145615.1:25803449-25803565	NW_022145615.1	25803449	25803565	LOC589754	0	CCCTGATAAAGATAGTCATTCCTTTGGCTATTTTTTACTTCTAATACATTTCAAGTAACTGGTTTGCTCGATAATGTTGAAATCATTTTGTCAAgcatttttaatcattttttcaa
Scaffold1022:164876-164957	Scaffold1022	164876	164957	WHL22.9560	SPU_017960	CATGTAATCAAGCATTAATCTAGAAATAGAAATCATTTAAATGCTGGAGTTGTATTGGAAAGTGGGGGTGGGGTGGGGAGG	115069	NW_022145597.1:27177482-27177565	NW_022145597.1	27177482	27177565	LOC100892843	1609	cccctccccaccccacccccactttCCAATACAACTCCAGCATTTAAATGATTTCTATTTCTAGATTAATGCTTGATTACATG
Scaffold1022:2042-2162	Scaffold1022	2042	2162	WHL22.9505	SPU_005871	TGCAGTCTATGCAATATTGTGTGGTGTGTATATTTGTGTATAATACCTGCCTCACAGCAAGTATACAGTGCTAGAGGTCAATATGCATTAGCATTGACTCTTTGCTTTGCTGGAGTGGAG	0	NW_022145597.1:27316462-27316582	NW_022145597.1	27316462	27316582	LOC764816	0	ctccactccagcaaagcaaagagtcaatgctaatgcatattgacctctagcactgtatacttgctgtgaggcaggtattatacacaaatatacacaccacacaatattgcatagactgcA
Scaffold1022:43847-43907	Scaffold1022	43847	43907	WHL22.9560	SPU_017960	GCTACCCGCAGAACTTCTGCTCCATGCGATGGCTGAAGGACGGCCTTCCCTTCCCGTGGG	0	NW_022145597.1:27275244-27275304	NW_022145597.1	27275244	27275304	LOC764822	0	CCCACGGGAAGGGAAGGCCGTCCTTCAGCCATCGCATGGAGCAGAAGTTCTGCGGGTAGC
Scaffold1023:22914-23407	Scaffold1023	22914	23407	WHL22.9369	SPU_018954	CCCAGACAATACTTGACTTCTTCGAAGCTTTTCTCCAGCTTTTCTCTTCGGCTTGATCCACCGGGCATTGAGCCGCTCGCAACCCGCTGCGAAGCCGCTCCTTTGACATCAGCCTCCCCGCGGCGTCGAACAGAAGATCTATGAATGACCCCATGCTGTAAACCCCCTTAAACCCTCTACCATCGACACAGGAGGTCAATCCCCTCTAGTACTATAAAGACCCCCTTGCCAATATCATCTTAGAAGCCTTCAGTCCACTCATAACAAAGATCCTCAAAAACCTTGTCTCTTATAACACGTCTAAAAACACACAAAGGAGGGAGGATCCGTTTTGGAAGTTCCTCCTTCTCACGATCTTTTACAGTTATTGTTCACTTCGAGTGGGACAATAAGTTTGCC…	3211	N/A	N/A	N/A	N/A	N/A	N/A	N/A
Scaffold1023:25250-25610	Scaffold1023	25250	25610	WHL22.9369	SPU_018954	GATTAATCAACCGATATTGACTAGCCTACCAATCTTCTTGTCTTCCCATTGCCCCCGACACCCTTAAAATTCGATTTTTAAATCACACTAGATCCTCTTGTGGAGCAATGAGTCCCCTGGTTGGCAATTAATTTACGCCTGTTGCGATACATTATCATGCTTTCTGAAGATGAAAAGCCTTTTTCTTTCTTCATTATTACACGCTGTCGGTTCGCCTTTCCAAGATCTATTCAAGCATTTAGGTCTCCGAAGGTGGACTGACACCCCGCTATTCCCTTTTCTCTGTCACCCCTCCCTCCCTCCCTCCTTAAAACCATTCTTCTTTTCTGTCTTGGTATCAAGAAACCGAATCGAGGTCTC	5547	NW_022145610.1:25864175-25864535	NW_022145610.1	25864175	25864535	LOC579936	5369	GATTAATCAACCGATATTGACTAGCCTACCAATCTTCTTGTCTTCCCATTGCCCCCGACACCCTTAAAATTCGATTTTTAAATCACACTAGATCCTCTTGTGGAGCAATGAGTCCCCTGGTTGGCAATTAATTTACGCCTGTTGCGATACATTATCATGCTTTCTGAAGATGAAAagcctttttctttcttcattattaCACGCTGTCGGTTCGCCTTTCCAAGATCTATTCAAGCATTTAGGTCTCCGAAGGTGGACTGACACCCCGCTATTCCCTTTTCTCTgtcacccctccctccctccctccttaaAACCATTCTTCTTTTCTGTCTTGGTATCAAGAAACCGAATCGAGGTCTC
Scaffold1023:26283-27364	Scaffold1023	26283	27364	WHL22.9369	SPU_018954	TATTTCCTAGATGTTGATTTATTCTTTCCTTTTTTTTCGTCTGTCCTTCATCGGTCCTTCGTCGTTCCATCCTTTCAGTAGACGTTACGTTAGAGTGAAAGGGAGGAAGCCCAACGATCGAACAAAGGCGACGAAAACTGGACAAGAAGTAAGGACTTAGCCCTCATTAGAGAAGATTTAACTCGCACGGTTTCCCCCACAGCTCCAATACGAAGATTCTCGGGGGGTAAGAGAGTGGTCTTAGGGGTGCAACAAAGACCCCCTACCTGTCAGTCACCTGCCAGCTTCGACTCATCCCGACCTCACAAACCAACATCCTATCACATCGCTGCCCCTCTCTTAATCTCCAGTTAAATGCTCTAACCCCATGAAAAGCCATGTAGGGTCTCTGAAAGGACG…	6580	NW_022145610.1:25865208-25866289	NW_022145610.1	25865208	25866289	LOC579936	6402	TATTTCCTAGATGTTGAtttattctttccttttttttcgtcTGTCCTTCATCGGTCCTTCGTCGTTCCATCCTTTCAGTAGACGTTACGTTAGAGTGAAAGGGAGGAAGCCCAACGATCGAACAAAGGCGACGAAAACTGGACAAGAAGTAAGGACTTAGCCCTCATTAGAGAAGATTTAACTCGCACGGTTTCCCCCACAGCTCCAATACGAAGATTCTCGGGGGGTAAGAGAGTGGTCTTAGGGGTGCAACAAAGACCCCCTACCTGTCAGTCACCTGCCAGCTTCGACTCATCCCGACCTCACAAACCAACATCCTATCACATCGCTGCCCCTCTCTTAATCTCCAGTTAAATGCTCTAACCCCATGAAAAGCCATGTAGGGTCTCTGAAAGGACG…
Scaffold1023:30373-30797	Scaffold1023	30373	30797	WHL22.9369	SPU_018954	GCGTCCTTGGACACGAATAAGTGATTTTCCTGTGCAGACGACAAGCAGACGACTGGGGTGGAAGAAAATGAGCATCGCGATCGATTGATCGTATTATCGGTTTCCTGTATAAACCCGCTCAATTTGATGTTTCGATGCGCTTGCAGTCGATAGATCACTTAGTCGGGATTATCCGATGTTCAAAGCAAGTATTACTTAGTATTGTTGGTTTAAGTGGGCTTCAATGCTGAAATAAGACCTCATTAGTGCCCGTCTTTGAATAAATAAATGTTTTATTGCAAGATGATGGGGCCGAGACAGGAAAGAAATCGATTTATCAATGAAAGTCAGATTATCAGTACAAAAGTATACACCCGTTACCGGACCCATCGCTTCCATAATTCTTTTCTTTCTCTCTCT…	10670	NW_022145610.1:25870559-25870983	NW_022145610.1	25870559	25870983	LOC579993	5362	GCGTCCTTGGACACGAATAAGTGATTTTCCTGTGCAGACGACAAGCAGACGACTGGGGTGGAAGAAAATGAGCATCGCGATCGATTGATCGTATTATCGGTTTCCTGTATAAACCCGCTCAATTTGATGTTTCGATGCGCTTGCAGTCGATAGATCACTTAGTCGGGATTATCCGATGTTCAAAGCAAGTATTACTTAGTATTGTTGGTTTAAGTGGGCTTCAATGCTGAAATAAGACCTCATTAGTGCCCgtctttgaataaataaatgttttattgcAAGATGATGGGGCCGAGACAGGAAAGAAATCGATTTATCAATGAAAGTCAGATTATCAGTACAAAAGTATACACCCGTTACCGGACCCATCGCTTCcataattcttttctttctctctct…
Scaffold1023:7487-7907	Scaffold1023	7487	7907	WHL22.9369	SPU_018954	CTTATGTGTACTCTTGAAGCAGCTGATGCTATCGTAGGTCAGTCTAATTAAGCTGAAGTTCAGGAGAAGGAAGGGTTTACAAGGTACCCAGCTGCCAATCACCCGACCAGACAGTATGGCCTTTGAAAAGCACGTTGGGTCAAGACAAAGGAACTCCCACTTGGTAGTGATCAACGAACTTAGACCGGCTAATCCTTCCGTTGTTCTTTTGGCAGTCAAAAGCCACGTTCCTGGGCCAATTTCCAACAGGATTCACCCATTATTAGAAGTAAGAAATGGGTCTTCTTTTGAAGCAATACAGGAGTTCTTTTTAAGGGATATGTCAATTAATTGGTGCGGTTTTGTCTCCGTTAATCCCGTTTATGGAGTTGTTCAGAGATTGACGTATGCTCTGAAGGT…	975	NW_022145610.1:25847334-25847754	NW_022145610.1	25847334	25847754	LOC579936	1013	CTTATGTGTACTCTTGAAGCAGCTGATGCTATCGTAGGTCAGTCTAATTAAGCTGAAGTTCAGGAGAAGGAAGGGTTTACAAGGTACCCAGCTGCCAATCACCCGACCAGACAGTATGGCCTTTGAAAAGCACGTTGGGTCAAGACAAAGGAACTCCCACTTGGTAGTGATCAACGAACTTAGACCGGCTAATCCTTCCGTTGTTCTTTTGGCAGTCAAAAGCCACGTTCCTGGGCCAATTTCCAACAGGATTCACCCATTATTAGAAGTAAGAAATGGGTCTTCTTTTGAAGCAATACAGGAGTTCTTTTTAAGGGATATGTCAATTAATTGGTGCGGTTTTGTCTCCGTTAATCCCGTTTATGGAGTTGTTCAGAGATTGACGTATGCTCTGAaggt…
Scaffold1024:150887-151193	Scaffold1024	150887	151193	WHL22.9885	N/A	TGGGTGAGCCATGTTTCGGTGAAGCATAATAAACAAGACTCCCTAAAATCACAATTGTATCCTACTAGGCCTCTTATCTCATCGATTTTGTTAGGAATAGATCTGAGATTCGCCATAGTGATAGTCGGTAATGGGGGCTTGTTGCCACGGCGACGCACGCGTTGTCTAACGCCACCTTTCTTCCCTCGTTTACGTCGGCTATGGTTCGGTGCACAACTGACGTTTTCATCTTGGTCTCCTCGCAGGGGCACCCAGGCCGGTAAATCAGGCGGTTGGAACCCCGGAGAATCCACTGTGTTGAGCTCA	37922	NW_022145607.1:26208658-26209059	NW_022145607.1	26208658	26209059	LOC115928352	0	GGAGTGAGCCATGTTTCGGTGAAGCATAATAAACAAGACTCCCTAAAATCACAATTGTATCCTGCTAGGCCTCTTATCTCATCGATTTTGTTAGGAATAGATCTGAGATTCGCCATAGTGATAGTCGGTAATGGGGGCTTGTTGCCACGGCGACGCACGCGTTGTCTAACGCCACCTTTCTTCCCTCGTTTACGTCGGCTATGGTTCGGTGCACAACTGACGTTTTCATCTTGGTCTCCTCGCAGGGGCACCCAGGCCGGTAAATCAGGCGGTTGGAACCCCGGAGAATCCACTGTGTTGAGCTCATACATGAACTTGGGTTCATATGAAATCCGGTTTCCATGACCATAACAATAACATTTGGGCGATATAAGTATAGTTATCACGATAGCAGTAATC…
Scaffold1025:5278-5617	Scaffold1025	5278	5617	WHL22.9649	N/A	ACCAGGAAGTTCCTGATATAACTATGCTTATAAAGTGAAGCAAGGAAGATGAAACTGGCATCTCCCATGTATACCGGTAGCTATGAGAATGGACATAATCCGAACCTATATGAGACTGCGAATAAGACTAGAACATCATGGAGGAGTTCCAAGCAGTACTTATCAAGGTTGGGCTGGCGATGTCCTGGCAAAGTTTGTTTATACTGCAGATTAGGGACTCTAACTCTCTCTTGCTCTGTGGTGAGCTTACCACCAAAATGCACCCCACTTTCGGGTCCAAAGTGGGGTGAAGTTTAAATGGACTGTTTTCGTCATGAATACCAATACTCTACATATAGG	2517	NW_022145602.1:5259871-5260210	NW_022145602.1	5259871	5260210	LOC585407	0	CCTATATGTAGAGTATTGGTATTCATGACGAAAACAGTCCATTTAAACTTCACCCCACTTTGGACCCGAAAGTGGGGTGCATTTTGGTGGTAAGCTCAccacagagcaagagagagttAGAGTCCCTAATCTGCAGTATAAACAAACTTTGCCAGGACATCGCCAGCCCAACCTTGATAAGTACTGCTTGGAACTCCTCCATGATGTTCTAGTCTTATTCGCAGTCTCATATAGGTTCGGATTATGTCCATTCTCATAGCTACCGGTATACATGGGAGATGCCAGTTTCATCTTCCTTGCTTCACTTTATAAGCATAGTTATATCAGGAACTTCCTGGT
Scaffold1025:66280-66661	Scaffold1025	66280	66661	WHL22.9709	N/A	AGCTCAATGGATTAACTTGTCATCTTCACCTGTAACTTGGAATTCTATTCTAATCTTCCTTGTCCATCGACAGCTGTCTGAAAAGCGGCTTTGTCATGTTGGAAGTAATCATTGTTCCCGTCACCTCTGGCAAATTCGTAGCCGTTCACGTCACAAACTGACAAAAAAAAGCTCCAAGCCTGCAACAAAGAATTGGCAATGTTTAACACTCAGGATAAAAGGGAAACATTCTGGGACTATTATCATGCAAATCTGCTGAAGTCATTTCTTTGTCACCCCTCTTGGAAATAGATCAGGGTTTAGGTACCCATTCAAACCTTCAACATCATGCTTTGTAGCTTAACCAGGAGAGCCAAATTTGTTTTGTACAACAGTAACTTC	19951	NW_022145594.1:44275022-44275403	NW_022145594.1	44275022	44275403	LOC591293	43952	GAAGTTACTGTtgtacaaaacaaatttggCTCTCCTGGTTAAGCTACAAAGCATGATGTTGAAGGTTTGAATGGGTACCTAAACCCTGATCTATTTCCAAGAGGGGTGACAAAGAAATGACTTCAGCAGATTTGCATGATAATAGTCCCAGAATGTTTCCCTTTTATCCTGAGTGTTAAACATTGCCAATTCTTTGTTGCAGGCTTGGAGCTTTTTTTTGTCAGTTTGTGACGTGAACGGCTACGAATTTGCCAGAGGTGACGGGAACAATGATTACTTCCAACATGACAAAGCCGCTTTTCAGACAGCTGTCGATGGACAAGGAAGATTAGAATAGAATTCCAAGTTACAGGTGAAGATGACAAGTTAATCCATTGAGCT
Scaffold1026:10280-10513	Scaffold1026	10280	10513	WHL22.9845	SPU_010646	TTCCTTTAATGTTGAAAGCGTAGAGTGCAATCAATTCGCAAATGTAAATCACTTTTAGGTTATTGGAACTATCTAATGCCATTGATTGTGGTAATAGAAAGAGAATGACAGGTTGAAAATCATTTTGTTATTGACACCATATTCACATAGTCCTTGCTTCCTTTCTTACATCCATTCATCAGCTGACCCAGAAGCAGCAGATTAATGAGCTCTTCAGCAACACAACCCTTGGC	0	N/A	N/A	N/A	N/A	N/A	N/A	N/A
Scaffold1026:25403-25707	Scaffold1026	25403	25707	WHL22.10173	N/A	GTTGTTTCAAATTAAAATTTCATCCCATGTAATGTAGTAGCAGTAGTAGAATGGTTTTTTATTAGACAACTTCAAAATGGTAGCCTGAAAGCTAAATTACATTGCAAGTTTTACATGTATTAAAAATCTTTTCAACAAACTTAGACATGGACAAGTACACATAATACACAGTCGGGTAGATCATAACTAATGTGTTAATTAGATAGTCTCTTGCATGGAATGGCATGTTTGTTTCATTATTGCCGTGCGTGAAAAAAATTACTTGCATGCATAACTGTCTTTGTGATGTCACAATGGCAAAGTG	0	NW_022145601.1:2926444-2926748	NW_022145601.1	2926444	2926748	LOC588292	0	CACTTTgccattgtgacatcacaaagACAGTTATGCATGCAAGTAATTTTTTTCACGCACGGCaataatgaaacaaacatgCCATTCCATGCAAGAGACTATCTAATTAACACATTAGTTATGATCTACCCGACTGTGTATTATGTGTACTTGTCCATgtctaagtttgttgaaaagatttttaatacatgtaaaacttgcaatgtaatttagctttCAGGCTACCATTTTGAAGTTGTCTAATAAAAAACcattctactactgctactacattACATGGGatgaaattttaatttgaaacaAC
Scaffold1026:41731-41737	Scaffold1026	41731	41737	WHL22.10197	SPU_010645	AAAAAG	3360	NW_022145601.1:2911537-2911543	NW_022145601.1	2911537	2911543	LOC100891931	3527	cttttt
Scaffold1026:46925-47282	Scaffold1026	46925	47282	WHL22.10197	SPU_010645	GTGTTATAGTCCTTTTCGTCCATAATTCCCAGAGTTGTTTCATATGCAACATTGGTAGATGAAAGACAGTGAATAATTTATGATAACTTTCCATTTCCTTCTCTCCCATTGGTAAAGGTTGCTCTGATTGCTTGGCCAGATCTGAAGCAATAAATCCTTTCTGGTTTGTCAAGCCTAACCCTGCTTTCAAACAACACATTCCTACATAGACATCGGACCAAGGAAACAGTGGTGTGTCTCTACACGCTTTCGAGATCTTCTGTGCCATGTCCATTGAGAACATGTAAGCAGGGCCCGTGAAAAAAGGCGGGAACTTTCTTCTCGGCCATAAATGGACGGGTGTGAAGAACTTTCCCC	0	NW_022145601.1:2906069-2906426	NW_022145601.1	2906069	2906426	LOC100891931	0	GGGGAAAGTTCTTCACACCCGTCCATTTATGGCCGAGAAGAAAGTTCCCGCCTTTTTTCACGGGCCCTGCTTACATGTTCTCAATGGACATGGCACAGAAGATCTCGAAAGCGTGTAGAGACACACCACTGTTTCCTTGGTCCGATGTCTATGTAGGAATGTGTTGTTTGAAAGCAGGGTTAGGCTTGACAAACCAGAAAGGATTTATTGCTTCAGATCTGGCCAAGCAATCAGAGCAACCTTTACCAATGGGagagaaggaaatggaaagttATCATAAATTATTCACTGTCTTTCATCTACCAATGTTGCATATGAAACAACTCTGGGAATTATGGACGAAAAGGACTATAACAC
Scaffold1026:61771-62132	Scaffold1026	61771	62132	WHL22.10220	SPU_010644	CTCCCATAACTGATTCATAATCGGCACAGTGAAATGGAAGACACTGACGTATTCCCGGATCTCATCTATTGCATTGTCGTTCTCTGCCAGCTCCGTCTTAGTGGCCATCTGGAAACCTCCGCTCAGAAAGCGGCTTGAATGGCGTAACCGAATTCCAAGTTTTTTAAGACACATGCCAACAAAGACGTCGGACCAAGGGAAAAGATCCGTTTCCAAGGAAACACGGTAGATGTTCTCTACGACGTCCGTGGAAAGTAGGTATGCATGTCCGTTGAAGTACGGCGGATACACCTTATCAGGATAGAGTGATTCTGGGGTGAGGAACTTCCCGTACAGTCCTCGTGGCGAACGAACCGGGGTC	0	NW_022145601.1:2891390-2891751	NW_022145601.1	2891390	2891751	LOC100892014	0	GACCCCGGTTCGTTCGCCACGAGGACTGTACGGGAAGTTCCTCACCCCAGAATCACTCTATCCTGATAAGGTGTATCCGCCGTACTTCAACGGACATGCATACCTACTTTCCACAGACGTCGTAGAGAACATCTACCGTGTTTCCTTGGAAACGGATCTTTTCCCTTGGTCCGACGTCTTTGTTGGCATGTGTCTTAAAAAACTTGGAATTCGGTTACGCCATTCGAGCCGCTTTCTGAGCGGAGGTTTCCCGATGGCTACTAAGACGGAGCTGGCAGAGAACGACAATGCCTTAGATGAAATCCGGGAATACGTCAGTGTCTTCCATTTCACTGTGCCGATCATGAATCAGTTATGGGAG
Scaffold1027:144192-144581	Scaffold1027	144192	144581	WHL22.16165	SPU_006519	AAGATGAGAACAAAATCCTGTGATATGATTTAGCAGGGGTAGTAATACCAGAAAGAACAAGTAATAACAACAACAACAACAAAAGCCGACACATTAGCTTTAACAATCTTCACAAGCACCCATTCTCACCTGGGTGGAGAGTGGCGATCAAATGTTTTGCCAAAGAACATGAAATCTGCATCCAGTCGGGTGACTAATCGACTAGACGCTCTAGACCACGACACCTCTAAGTCCAACGGGACACATTTCACAGACGTACCCATATTCGGTCGGTCTCGCTTTCTTTCTCATAATTGCAGATGTATAAGTAGGTCATTCATGTACGCAATTAACTGTCAAGGTCAAAAACGCTCCAAATTTGCAATTTATTTTCTCTTTCCAGTGTGGGG	9033	NW_022145606.1:39238436-39238825	NW_022145606.1	39238436	39238825	LOC100892694	9024	CCCCACActggaaagagaaaataaattgcAAATTTGGAGCGTTTTTGACCTTGACAGTTAATTGCGTACATGAATGACCTACTTATACATCTGCAATTATGAGAAAGAAAGCGAGACCGACCGAATATGGGTACGTCTGTGAAATGTGTCCCGTTGGacttagaggtgtcgtggtctagagCGTCTAGTCGATTAGTCACCCGACTGGATgcagatttcatgttctttggcaaaacatttgatcgccactctccacccaggtgagaaTGGGTGCTTGTGAAGATTGTTAAAGCTAATGTGTcggcttttgttgttgttgttgttattacttGTTCTTTCTGGTATTACTACCCCTGCTAAATCATATCACAGGATTTTGTTCTCATCTt
Scaffold1027:146002-146332	Scaffold1027	146002	146332	WHL22.16165	SPU_006519	CCTTTCTCACGATTCGGGTAACAATACCAATTGGTTACAAAGTCCATTTCCATGTTATGATAACATAACATCCACTTTCGTACCGTCTAAACATTTCAGTTCAAAATATATATTACGCTATTATCATATTGGAATGGGAGAGAACACACACGCTCGCACTGCACTCATGACATCCCGAAACGTGCATGCATAATGAATGAATTACCCGCATTGCAAATTGCATGGGGGAATTTACAGCGATCGAATATATACAGAGAACCAATGGGCTGGCTATGCTATGGCATTTCAACGTTAGTCACAACACACAAATTCGATGAAAATGAAAGCATT	7282	NW_022145606.1:37918961-37919291	NW_022145606.1	37918961	37919291	LOC115927440	5934	AATGCTTTCATTTTCATCGAATTTGTGTGTTGTGACTAACGTTGAAATGCCATAGCATAGCCAGCCCATTGGTTCTCTGTATATATTCGATCGCTGTAAATTCCCCCATGCAATTTGCAATGCGGGTAATTCATTCATTATGCATGCACGTTTCGGGATGTCATGAGTGCAGTGCGAGCGTGTGTGTTCTCTCCCATTCCAGTATGATAATAgcgtaatatatattttgaactgAAATGTTTAGACCGTACGGAAGTGGATGTTATGTTATCATAACATGGATATAGACTTTGTAACCAAACGGTATTGTTACCCGAATCGTGAGAAAGG
Scaffold1027:150289-150684	Scaffold1027	150289	150684	WHL22.16165	SPU_006519	CGCCCACTAAATCACTAAAAAAAATCCAAGATCGGTTGAACTTGTTTATACCCCCTTTTTTGTTTACCTCGGTCGATTACATGCATGTGCCCCCCCCCCCTTCCCCAAACATCAAACTCTGGCTACGTGCCTGGGGGGGGGGGGGGGGTAGATTATAAACACTGAACAAAGAAGAAAGTCATGAATGTTGACATTCGAGAATCGAGATCGATTAATTTCTCCTTGTCAATGTTGCCCTGATAATTATGTAATGCGCTAGCCCTACAATAAAGAACTTTAAAAGTTGTTCTATACAATTATTGAAAGAATTTCATTTCTCACTTAAAGGGATCCGGTAGCCTTGTCTCAGATTCTGAAACAAAATTCTGGATTTAACTTAAGGTGCAATGATAAGT	2930	NW_022145606.1:39232337-39232731	NW_022145606.1	39232337	39232731	LOC100892694	2925	ACTTATCATTGCACCTTAAgttaaatccagaattttgtttcagaatctgagacaaggctaccggatccctttaagtgagAAATGAAATTCTTTCAATAATTGTATAGAACAACTTTTAAAGTTCTTTATTGTAGGGCTAGCGCATTACATAATTATCAGGGCAACATTGACAAGGAGAAATTAATCGATCTCGATTCTCGAATGTCAACATTCATGACTTTCTTCTTTGTTCAGTGTTtataatctacccccccccccccccaggcacgtagccagagtttgatgtttggggaagggggggggggcacatgcatGTAATCGACcgaggtaaacaaaaaagggggtataaacaagttcaaccgatcttggattttttttagtGATTTAGTGGgcg
Scaffold1027:18919-19071	Scaffold1027	18919	19071	WHL22.10029	SPU_021080	ACTGTGGCATTGGAGCATCTGTGTACTCCTACGCACCATAATGCTTATAATCTGTAGAGTATACATCGCTGTCCATGCAGTATTCCGTCGGTTGGCCCGTGTTATTAGAACATCCACCAGATCAGTTGACTCTCAATGCAATGCTGCCGGAA	5248	NW_022145612.1:39537917-39538069	NW_022145612.1	39537917	39538069	LOC753198	7712	ACTGTGGCATTGGAGCATCTGTGTACTCCTACGCACCATAATGCTTATAATCTGTAGAGTATACATCGCTGTCCATGCAGTATTCCGTCGGTTGGCCCGTGTTATTAGAACATCCACCAGATCAGTTGACTCTCAATGCAATGCTGCCGGAA
Scaffold1027:209142-209430	Scaffold1027	209142	209430	WHL22.17916	SPU_013322	GCTCATTTACCCCCACACGTGTAATTGTACCCACAAAACTGATCACCAAGATGGAAAGTTTGCTTTGTGCAACACATTGGCTTTGGTAAATTATCCACTTCCGGTTTTGATTGAATCCATGACAACCATTGTTATTAATCTTGCACTAGAAACACCAAATATTGAACAATTTTATGTTTTACCCTATATCATAGATGCAATGTGGCACAAGGATATTATTTGTAAGTCAGATAAAGATTTAAAGTACTCTAATTCGTGTTAAATTAAACAATAAGAGATACACTGTTG	0	NW_022145606.1:37844042-37844330	NW_022145606.1	37844042	37844330	LOC585309	23724	CAACAGTGTATCTCTTATTGTTTAATTTAACACGAATTAGAGTACTTTAAATCTTTATCTGACTTACAAATAATATCCTTGTGCCACATTGCATCTATGATATAGGGTAAAACATAAAATTGTTCAATATTTGGTGTTTCTAGTGCAAGATTAATAACAATGGTTGTCATGGATTCAATCAAAACCGGAAGTGGATAATTTACCAAAGCCaatgtgttgcacaaagcaaacTTTCCATCTTGGTGATCAGTTTTGTGGGTACAATTACACGTGTGGGGGTAAATGAGC
Scaffold1027:240510-240847	Scaffold1027	240510	240847	WHL22.18227	SPU_008217	CCCCATCATCTTTTATTCAAACTTATCTCATGAATTATGCATGAGATTGGGCGCGCGCAAACTGCATGGCCTAGCCGCCGTGTGTAGCCTCCTCTGAGAACGCTGTGGTTTTCTTATTTTCTGTTATTGCTTTTTCTTTCAGGCAAACGGAAGCATCGAACGATTTCGAATGCTCTTCACAAAGTCACTTTCAGCCGACGTACATGCGTTGACCTGCGTCTGGCTACTGGAGCCAAACGCGGTAGCGGTTGGGTAACGAAACGGCTGGATAGTAACGTCTATACGGCAATCAATAGCAATCAATGCAGAGCGGAAAGTGAAGTGTGGCTTTTCATAC	0	NW_022145606.1:37831226-37831563	NW_022145606.1	37831226	37831563	LOC105436739	22410	GTATGAAAAGCCACACTTCACTTTCCGCTCTGCATTGATTGCTATTGATTGCCGTATAGACGTTACTATCCAGCCGTTTCGTTACCCAACCGCTACCGCGTTTGGCTCCAGTAGCCAGACGCAGGTCAACGCATGTACGTCGGCTGAAAGTGACTTTGTGAAGAGCATTCGAAATCGTTCGATGCTTCCGTTTGCCTGAAAGAAAAAGCAATaacagaaaataagaaaacCACAGCGTTCTCAGAGGAGGCTACACACGGCGGCTAGGCCATGCAGTTTGCGCGCGCCCAATCTCATGCATAATTCATGAGATAAGTTTGAATAAAAGATGATGGGG
Scaffold1028:199690-200011	Scaffold1028	199690	200011	WHL22.16181	SPU_020197	CTTGGAATGAAGACAAGAGGCGGGTCTAGAGTCATATTCACTTTGCTGTGAGAGGGGCGGGTGTCGAGTGTGAACTTATCGTAGGTCTCTTCGTATATTGATCGGTCGTTGGATCTGTTCCGTGCATTTGGCACATCTTCTGAATAGATTCACCTCGTTGGCATATTGCTTCCACCCCGCTCTCTTTAGTCTCCTTCGTATAGCTACCAGGATTGCATCCTTCGTCTGATTTGAGTTAACATAGTGGCCAAGTGTAGCAGCCATAACCGCATAATGATGCATAATAGTAATAGATCTCCCTTGATAGTACTTTTACAGTAA	4690	NW_022145613.1:20785992-20786313	NW_022145613.1	20785992	20786313	Coel1	9571	TTACTGTAAAAGTACTATCAAGGGAGATCTATTACTATTATGCATCATTATGCGGTTATGGCTGCTACACTTGGCCACTATGTTAACTCAAATCAGACGAAGGATGCAATCCTGGTAGCTATACGAAGGAGACTAAAGAGAGCGGGGTGGAAGCAATATGCCAACGAGGTGAATCTATTCAGAAGATGTGCCAAATGCACGGAACAGATCCAACGACCGATCAATATACGAAGAGACCTACGATAAGTTCACACTCGACACCCGCCCCTCTCACAGCAAAGTGAATATGACTCTAGACCCGCCTCTTGTCTTCATTCCAAG
Scaffold1028:65619-66018	Scaffold1028	65619	66018	WHL22.10598	N/A	CTTTGTGCCAGATCCTAACAAGCGCACTTTATTAATTGGATTGAAACATTTAAGATGTTACTAAATAATCTTGATATCATTCTATCTTTATCAAGAAAGATAAAAGCCTTGCTGAATCAATACATCTAAGCTTAATCTCATTATTATACGCAAATTACCAAGGGAGTCTTAATAAGATAGATGGGAGATATGAAATACATATTAATTGTACTTAATTGCTATAACCGTGTATTGCTACGTCAGTGTGGTATTGTCTTTCGATTTCCAACTGCTTACGTGCTTATAATCTCCTGAGATTACTAATTAATATTTGTTCGGTAGGAGTGATAGTGATGGTCACGGTGATGACAAATCGATGAAATCTTTAAATTACTGTGCTGCACGGATACTGATTATGTC	81676	NW_022145604.1:23303743-23304142	NW_022145604.1	23303743	23304142	LOC115926127	12396	CTTTGTGCCAGATCCTAACAAGCGCACTTTATTAATTGGATTGAAACATTTAAGATGTTACTAAATAATCTTGATATCATTCTATCTTTATCAAGAAAGATAAAAGCCTTGCTGAATCAATACATCTAAGCTTAATCTCATTATTATACGCAAATTACCAAGGGAGTCTTAATAAGATAGATGGGAGATATGAAATACATATTAATTGTACTTAATTGCTATAACCGTGTATTGCTACGTCAGTGTGGTATTGTCTTTCGATTTCCAACTGCTTACGTGCTTATAATCTCCTGAGATTACTAATTAATATTTGTTCGGTAGGAGTGATAGTGATGGTCACGGTGATGACAAATCGATGAAATCTTTAAATTACTGTGCTGCACGGATACTGATTATGTC
Scaffold1029:142080-142219	Scaffold1029	142080	142219	WHL22.10812	SPU_006240	TCTTTCTCCCTCGTTCGTTTTCTTATCTTTTACCGTGTGCAACCTGCTGCATTGATACACACTGAGAATTTTCTATATTCCTTTTGTTTCTGGGGAATTTCCACTCCTATATTTATAACACCGTTTTCCCTTACCTCGC	2809	NW_022145596.1:8280314-8280453	NW_022145596.1	8280314	8280453	LOC582268	2815	GCGAGGTAAGGGAAAACGGTGTTATAAATATAGGAGTGGAAATTCCCCAGAAACAAAAGGAATATAGAAAATTCTCAGTGTGTATCAATGCAGCAGGTTGCACACGGTAAAAGATAAGAAAGCGAacgagggagaaaga
Scaffold1029:143185-143671	Scaffold1029	143185	143671	WHL22.10812	SPU_006240	AAAAAACTCAAATTCAACACAGGTCATATAGGTATGCGTCATCTGGACAGCAATCATGGCAGTCCAGCTAAAGCTAAGTCTTGTCTGTGCCAATGTCTCAAATTAAAGGCTATGACGTAATGCAAGGGTTTTCCCCACTATCGCTGCCACAGCTGTGGATTCAGATCACGATAAAACCGGTGAGAACTGGTTTGGGGTCGAAATCAAACATATGGAGAAGATGACTGGGGGAGCAATGTCGGATAGGGGAGGATGATGGGAGTAAGATAGGAGCGATTGAAAAAAGAGGAAATACACGAAGCAGTATTAAAACCTTTTCAAAGGTCAAGACAAGGCAATTTTGACACAACATGGAAGTTGAAACATACATCGGGTTTGATCCTACGTGTCCGGAAAATA…	1357	NW_022145596.1:8278861-8279348	NW_022145596.1	8278861	8279348	LOC582268	1362	AATTACATTGTGGGTGTACCCCGAATAATATCGTTTTGAGAGTATATGTCGAAGTTTATAATTTAGCTGAATAATAGGCCATGAGTATATTTTCCGGACACGTAGGATCAAACGCGATGCATGTTTCAACTTCCATGTTGTGTCAAAATTGCCTTGTCTTGACCTTTGAAAAGGTTTTAATACTGCTTCGtgtatttcctcttttttcaatCGCTCCTATCTTACTCCCATCATCCTCCCCTATCCGACATTGCTCCCCCAGTCATCTTCTCCATTATGTTTGATTTCGACCCCAAACCAGTTCTCACCGGTTTTATCGTGATCTGAATCCACAGCTGTGGCAGCGATAGTGGGGAAAACCCTTGCATTACGTCATAGCCTTTAATTTGAGACATTGGC…
Scaffold1029:143901-144156	Scaffold1029	143901	144156	WHL22.10812	SPU_006240	TAGTGCAACGAGTGTCTGCACGATAAGACTATCTAATGAACTCGTTGAGGGTTCAACGTTCAACATCATTGCGCCATGTCTCTTCGGCTGCACCGGGGATTGCGCAATCCACTTGCGATGTTTACAGATACGACTATCAATTGCAACATAGTTCAAGCACATTTTTAGATGTAACTGTTTGTTGAGATTCGGGCTTCAGGAAATGTTTAATTTGAACAATAGAGAGAAGTAATCTTCTTTAGGTTGTTCATGTTC	872	NW_022145596.1:8278368-8278623	NW_022145596.1	8278368	8278623	LOC582268	869	GAACATGAGCAATCTAGAGAAGATTACTTCTTTCCATTGTTCAAATTGAACATTTCCTGAAGCCCGAATCTCAACAAACAGTTAAATCTAAAAATGTGCTTGAACTATGTTGCAATAGATAGTCGTGTCTGTAAACATCGCAAGTGGATTGCGCAATCCCCGGTGCAGCCGAGGAGACATGACGCAATGATGTTGAACGTTGAACCCTCAACGAGTTCATTAGACAGTCTTATCGTGCAGACACTCGTTGCACTA
Scaffold1029:154150-154453	Scaffold1029	154150	154453	WHL22.11343	SPU_006246	AGATAAAAGTCCTGCTTAGCCTGGTATTACATGTTCCTTGCAGAAATAAGACATGCCATTTGGATATGGTGCTGACCTCGATAAACATGTCCTACATTCTTTGAACATGAACTGCGAAAGAAGATATTTTTAAACTGAAAACAAAACAGAATTATCAAGGGTAAAAACAACACTTTCTAGATCTTTCGAATGTCGTAAGCTGAACATTGTCCAAATACAGTTCGAGATCGCCTTGCGCAATGACTCAAATAGTCTATTTAATTCAGTCCTTGTATTGCACATACTATAGTGATAGGAAGTGCC	679	NW_022145596.1:8265286-8265589	NW_022145596.1	8265286	8265589	LOC100893496	687	GGCACTTCCTATCACTATAGTATGTGCAATACAAGGACTGAATTAAATAGACTATTTGAGTCATTGCGCAAGGCGATCTCGAACTGTATTTGGACAATGTTCAGCTTACGACATTCGAAAGATCTAGAAAGTGTTGTTTTTACCCTTGataattctgttttgttttcagTTTAAAAATATCTTCTTTCGCAGTTCATGTTCAAAGAATGTAGGACATGTTTATCGAGGTCAGCACCATATCCAAATGGCATGTCTTATTTCTGCAAGGAACATGTAATACCAGGCTAAGCAGGACTTTTATCT
Scaffold1029:254429-254802	Scaffold1029	254429	254802	WHL22.10701	SPU_007475	TCCCGGATCTCCTCGTTGGAGAGGTGTCGGCTGCGACATCGACTGAAAGACAGCTTTGAGGCTGAACATAAAATCAAATATCATAATGAGTAACGGTCAAGCAATTGTACATCTACTGTGACAGAAGCAATTTAAAAGTAATTCTGAAAAATAGATTACCGGTATGCAGTATAAATATGAATACTCTGGTTCTGGAATAAACAACACTGTATTAAACGGTAATCAAACAATTTCATGAAGACCAGCCTTCCCCTTCCCCTGCCCCTTACTAACCTGTCAGATGGACTCTTGCATCCTGGTAGTCAGTCACCTCCCATCACATCTCCAAAACTCAAACCTTTTCTCTCCTTCAATTCTCTCCCCTATTCACGAC	12843	NW_022145596.1:8171804-8172177	NW_022145596.1	8171804	8172177	LOC581076	0	GTCGTGAATAGGGGAGAGAATTGAAGGAGAGAAAAGGTTTGAGTTTTGGAGATGTGATGGGAGGTGACTGACTACCAGGATGCAAGAGTCCATCTGACAGGTTAGTAAGGGGCAGGGGAAGGGGAAGGCTGGTCTTCATGAAATTGTTTGATTACCGTTTAATACAGTGTTGTTTATTCCAGAACCAGAGTATTCATATTTATACTGCATACCGGTAATCTATTTTTCAGAATTACTTTTAAATTGCTTCTGTCACAGTAGATGTACAATTGCTTGACCGTTACTCATTATGATATTTGATTTTATGTTCAGCCTCAAAGCTGTCTTTCAGTCGATGTCGCAGCCGACACCTCTCCAACGAGGAGATCCGGGA
Scaffold1029:358303-358635	Scaffold1029	358303	358635	WHL22.10745	SPU_026213	GGGAGGGGTACTCAAAAACATATGTGCAATGGTTATTGACATACAAAGTTCACAATTCAAATGACAAATGCAAACTTGGAATGTTGCCTAGTCGTATCATGTCTTGTCATAAAGTGGAAGGGGGTAAAAGGGGTTACCATGGTGTCATCAAATGTCAATGATGGCCCCATTAATATGATCTAACAACAGCTTGTCTACTTCATTTACTAAGTGTAACACACAATTTTTGTATACTTTGTTTCTTAATACTACAGCCTGTAAAAGATATCCTGGACACCCTGGCTACATACAGACTCAAGCTAAAGATGAGCAGTGAGGAATCCGAAGAGACC	0	NW_022145596.1:8066595-8066927	NW_022145596.1	8066595	8066927	LOC100887842	0	GGTCTCTTCGGATTCCTCACTGCTCATCTTTAGCTTGAGTCTGTATGTAGCCAGGGTGTCCAGGATATCTTTTACAGGCTGTAGTATTAAGAAACAAAGTATACAAAAATTGTGTGTTACACTTAGTAAATGAAGTAGACAAGCTGTTGTTAGATCATATTAATGGGGCCATCATTGACATTTGATGACACCATGGTAACCCCTTTTACCCCCTTCCACTTTATGACAAGACATGATACGACTAGGCAACATTCCAAGTTTGCATTTGTCATTTGAATTGTGAACTTTGTATGTCAATAACCATTGCACATATGTTTTTgagtacccctccc
Scaffold1029:369815-369944	Scaffold1029	369815	369944	WHL22.11012	SPU_026214	GCTTTTTTTCTTGAAGGGTCTACAATTTATAAACAAAACTGACAACCCACTGCGTGTATTGATTGTGTAGCGTATTGATTCTCTCAGCCATTCACATACATACCAGGATACTCTTGAGTTAAAAAGGGG	0	NW_022145596.1:8055247-8055376	NW_022145596.1	8055247	8055376	LOC575200	0	cccctttttaactcaAGAGTATCCTGGTATGTATGTGAATGGCTGAGAGAATCAATACGCTACACAATCAATACACGCAGTGGGTTGTcagttttgtttataaattgtAGACCCTTCAAGAAAAAAAGC
Scaffold1029:373944-374297	Scaffold1029	373944	374297	WHL22.11012	SPU_026214	AAAGCGTTTCCATACCCACCCACCAGAAATGTTGAATATTTCCGGGATAGATTCTTTTGCTACTAGCCCTCAAAATGCTTAGGGTTTCAGGGGCAATAATACCCTCAGAGCCTTTGAAAAATGCTATAGAGCCCCATAATAACACTATCATAATGTTTTTTAAAAATATTTTACTATAAGGAAAATGTTGCATTTTAAATTAGCCCTTTTATTACTAAGGAACAGCCCCCTACCCCTTCCCCCCCCCCCCCCCAAAAAAAAAAAATGAGGACAAGCTCTGATGCCTAGCAAGCCACAATAGCTTAATGATGAACTTGGCACTTGACATCACTTTCAAACGATGCAGTTAAGGG	0	NW_022145596.1:8050983-8051330	NW_022145596.1	8050983	8051330	LOC575200	0	CCCTTAACTGCATCGTTTGAAAGTGATGTCAAGTGCCAAGTTCATCATTAAGCTATTGTGGCTTGCTAGGCATCAGAGCttgtcctcatttttttttttggggggggggaggggtagggggcTGTTCCTTAGTAATAAAAGGGCTAATTTAAAATGCAACATTTTCCTTAtagtaaaatatttttaaaaaacattatgaTAGTGTTATTATGGGGCTCTATAGCATTTTCCAAAGGCTCTGAGGGCATTATTGCCCCTGAAACCCTATTGCATTTTGAGGGCTAGTAGCAAAAGAATCTATCCCAGAAATATTCGACATTTCTGGTGGGTGGGTATGGAAATGCTTT
Scaffold1029:382584-382974	Scaffold1029	382584	382974	WHL22.11012	SPU_026214	CCCCTCCTTAATTGTGTTGTATTCAAAGAGCATTGTAAACTTGTCTATAGATACTAGATAGCTCACATATCTACCTTTGTTCTTCCTCAACCAACCCCCCACCATGTTATCACCCCCACACAGATCTCCGTTAATTGTGTAAAGACTATTCTTATAGAGCACTCGCACAAGAGAACATTTTGTATGAAACTTGTACAAAGCATTCACAAAAAAGAGGATTCACAAAAAAGAGTATTCACAAAAAAGAGCATTTATACAAAACTTGTACAAAGAGACATTCTATTTTAGCAAAAGGGGCATAGGCATGAAATAAGGATATCTAGGTTAGAAAGATGAAGAAATTAGTTTTGTGGAGTTAAGTTTACACCATACCATGTTGAGCATCAGCTT	0	NW_022145596.1:8046914-8047308	NW_022145596.1	8046914	8047308	LOC575200	0	CCCCTCCTTAATTGTGTTGTATTCAAAGAGCATTGTAAACTTGTCTATAGATACTAGATAGCTCACATATCTACCTTTGTTCTTCCCCAACTAGCCCCCCACCATGTTATCACCCCCACACAGATCTCTGTTAATTGTGTAAAGACTATTCTTATAGAGCACTCGCACAAGAGAACATTTGTATGAAACTTGTACAAAGCATTCACAAAAAAGAGGATTCACAAAAAAGAGTATTCACAAAAAAGGAGCATTTATACAAAACTTGTACAAAGAGACATTCTATTTTAGCAAAAGGGGCATAGGCATGAAATAAGGATATCTAGGTTAggtagaaagataaagaaattagTTTTGTGGAGTTCAGTTTACACCATACCATGTTTAGCATCAACTT
Scaffold1029:389928-390002	Scaffold1029	389928	390002	WHL22.11012	SPU_026214	TATGTGAATGTGTGTACCCTTGCAGTGTATCCAGGGCAAAAGATTAGACCTTTGATCTCCTTTCGGTGACCCCG	0	NW_022145596.1:8042528-8042602	NW_022145596.1	8042528	8042602	LOC575200	0	CGGGGTCACCGAAAGGAGATCAAAGGTCTAATCTTTTGCCCTGGATACACTGCAAGGGTACACACATTCACATA
Scaffold1029:396080-396288	Scaffold1029	396080	396288	WHL22.11012	SPU_026214	GTGAAGCCAGGAATATTTTCTCCATGAGTGTGCCTTTTTGCACTCCTGAGCACTCATTGTCACAATGGAGCCTGAATTGATTGCCATACCTTCCCATTGATTATAACCCTCGTATGATTGTTGAGGGGGTACTCAAGTAGGAGTCAAGTGGGTGAGAGACCAAAGTCAATTGGTAATATGTTTGATCAATAGAGGGCTTTTTGTGACT	4308	NW_022145596.1:8037165-8037373	NW_022145596.1	8037165	8037373	LOC575200	0	AGTCACAAAAAGCCCTCTATTGATCAAACATATTACCAATTGACTTTGGTCTCTCACCCACTTGACTCCTACTTGAGTACCCCCTCAACAATCATACGAGGGTTATAATCAATGGGAAGGTATGGCAATCAATTCAGGCTCCATTGTGACAATGAGTGCTCAGGAGTGCAAAAAGGCACACTCATGGAGAAAATATTCCTGGCTTCAC
Scaffold1029:69672-69998	Scaffold1029	69672	69998	WHL22.10652	SPU_018915	ACCTCTTTTTGTCATTCATTAGATATTGCACACAACTTCATAGGTGCAGTCAGTGCTTGGCAAACAAACTGAATGAGTAATACAAAGTAATGGTAATACAGTCATTATTTTGCTATTTCACAATTTAGCTTCATTATGTCTCACACCACACTTGTACTTTAATCAGACACTAAAATTACGGATATTACACTAATGACAGTACAGAGTGTCTTCCATCTATACCTATATTTCACCATGGTGGTGCAATACTTGTGACCCGACTAAGGTCACGTACGGAACCGCACAGTACCCAAGCCCTCTGGCTCTCACTCAGCTCCACGTCTACG	689	N/A	N/A	N/A	N/A	N/A	N/A	N/A
Scaffold103:182800-183083	Scaffold103	182800	183083	WHL22.11036	SPU_004599	CCCCACCACAACCCCTTTGCTTTTGGGAAATTTCTCTTCCTTCCCACAAAAAAATTGTACATATATATTTTAAGATATATTTTATTTGTTTTTGTGAGGAAAATAGATGTTCATTAAATTGAAACATTGAAATTATTAATATTATTATTATCAAAATTGTTTTTATTGTAATATTAATTAATATTATTAGTTTTACCATCGCTGTTGCTATTAGTATTATCATGATTATTATTATTTGCTTTAATATTAATAATTGTATTTACCTACGTAAGCCTAATTAGCG	279408	NW_022145595.1:14014510-14014805	NW_022145595.1	14014510	14014805	LOC105437406	13902	CGTTAGTTAGGCTTACGTAGGTATAttcaattattaatattaaagcaaataataataatcatgataatagtaatagcgATGGTAAAACTAATAATATAAATTAGTATTACACTTACaacaattttgataataataatattaataatattattattaatagttaATTTCAATGTTTCAATTCAATGAACATCTATTTTCctcacaaaaacaaataaaatatattttaagatatatatgtacaattttttGTGGGAAGGAAGAGAAATTCCCCATGAGCAAAGGGGTTGTGGTGGGG
Scaffold103:190166-190629	Scaffold103	190166	190629	WHL22.11036	SPU_004599	AGACTGAGAAGTAGGTTGGTACGTCCAAAAGACCAAATTCCAAGAGAGGAAAAGACAGGCATTGTGTTCAAGATTACTTGCACAGGTTGTAACAATTCTTATGTTGGGGGAAACGGGCAGAACTCTTAATGAGCTATCAAAAACACAAAAGAGCCCTCAGATTGAGTAACCCTTTCCATTCAGCTTAATAGCTGAACACACCCTCAACACAGGACACAATGTCGGATGGGATGATGCCCTCATTTTTTTTTACTTTGAAAGCAACTTCTGGTCAAGAAATGTGAAAGAGTCAATATGGATTAAGAGGATTAAGCCTACACTTTAGCAGGGACTCTGGATACCCATTGTCACATTTTTTTGGTTCACTGATCGCAAAACACCAGGCAGCGCTAAGAAAAC…	271862	NW_022145595.1:14006219-14006682	NW_022145595.1	14006219	14006682	LOC105437406	5611	GAATTTTGTGGGCGAGCTTTCGTCTACACATGTGGACTTACTCAAGCTAAGTAATCAGTCACACGTTTTCTTAGCGCTGCCTGGTGTTTTGCGATCAGTGAACCAAAAAAATGTGACAATGGGTATCCAGAGTCCCTGCTAAAGTGTAGGCTTAATCCTCTTAATCCATATTGACTCTTTCACATTTCTTGACCAGAAGTTGctttcaaagtaaaaaaaaatgagggcaTCATCCCATCCGACATTGTGTCCTGTGTTGAGGGTGTGTTCAGCTATTAAGCTGAATGGAAAGGGTTACTCAATCTGAGGGCTCTTTTGTGTTTTTGATAGCTCATTAAGAGTTCTGCCCGTTTCCCCCAACATAAGAATTGTTACAACCTGTGCAAGTAATCTTGAACA…
Scaffold103:255215-255640	Scaffold103	255215	255640	WHL22.11036	SPU_004599	TAAAGACCAATGCAGCAGATCTCCTATACTATCTGTATACTTCGTCGCCCACAGCTCACCAAGCTGTTGCAGTCAAGAGCCAAAATTACATGTGGCGCCTATTGCTCTTTACGTCAAATGGTCAAAAGAGCAAAATGCATCAAGATGGAGTCTTTATAGTGCTCGTGTGATTGGTCATTGTGGAGACGGTCTACTTATCGACTCTATTATGCAGGGTGTAATTAAAGTTTGATTACGACATGTCAAAGAGACATACGTGGGAGGCCGTTCTGCTTAGAGCTCGGGAGCTGACGTGAATATAGGGCTCGCATAGTCCGCATATGTGTCGCCATTATAATATTTACAGTTTAAAGCTAAATTAGTCACACCTCTTGTGATTTTGATGGTTGTTTTGATTGT…	206851	NW_022145595.1:13938418-13938843	NW_022145595.1	13938418	13938843	LOC105437406	30946	GGTCTACCTTTACAATCTTGCGTTTACGACAAACACAACAAACATCAAATTCACAAGAGGTGTGACTAATTTAGCTTttaactgtaaatattataatggCGACACATATGCGGACTATGCGAGCCCTATACACGTCAGCTCCCGAGCTCTAAGCAGAACGGCCTCCCACGTATGTCTCTTTGACATGTCGTAATCAAACTTTAATTACACCCTGCATAATAGAGTCGATAAGTAGACCGTCTCCACAATGACCAATCACACGAGCACTATAAAGACTCCATCTTGATGCATTTTGCTCTTTTGACCATTTGACGTAAAGAGCAATAGGCGCCACATGTAATTTTGGCTCTTGACTGTAACAGCTTGGTGAGTTGTGGGCGACGAAGAATACGGATAGTG…
Scaffold103:402219-402587	Scaffold103	402219	402587	WHL22.11036	SPU_004599	CAAACTTTAATGATATCACTGAAGTCCGTGTTATCTGCATGTAGATATATTGACTAAACAAAAGAAATGAATTTGACCTATGAGAACAAAAAATATTAAAAAATGAGACGTACACGGGATTCTGCAAATTCTATGCCCGCCCGGGATCCCTTCTTTACTCTTCCTTTGGTGGCACCCGCCGATGACAGAAGGGAAAGGGATGAGTTTGGGGATGCTCTGCACCATGCTGCCATCGTGGAGTCGCTTCATCTTACACTTTTGGAACATGGGCAAAGTGTAATTTAGGCCGTACCAGTCTGGACAAGATGACCTATCCGATAACACAGGCAAGGCTGTGAAGAAAACATTAGAAAATTAATAGCTAGTTG	59904	NW_022145598.1:28240507-28240875	NW_022145598.1	28240507	28240875	LOC592895	3832	CAAACTTTAATGATATCACTGAAGTCCGTGTTATCTGCATGTAGATATATTGactaaacaaaagaaatgaatttgacctatgagaacaaaaaatattaaaaaatgagaCCTACACGGGATTCTGCAAATTCTATGCCCGCCCGGGATCCCTTCTTTACTCTTCCTTTGGTGGCACCCGCCGATGACAGAAGGGAAAGGGATGAGTTTGGGGATGCTCTGCACCATGCTGCCATCCTGGAGTCGCTTCATCTTACACTTTTGGAACATGGGCAAAGTGTAATTTAGGCCGTACCAGTCTGGACAAGATGACCTATCCGATAACACAGGCAAGGCTGTGAAGAAAACATTAGAAAATTAATTGCTAGTTG
Scaffold103:735811-736181	Scaffold103	735811	736181	WHL22.11422	SPU_028047	ATTACACGACACCAATATTGGCGTAAGAGTACAGGGACAGATAATCAACAACCTAGGATTTGCTGACGACCATGTCCTTATAGCTGACAATGATAGAGACCTTTAAACACTAGTTGACCTAATACATCAGAGCAGCTCAAACTTTGGACTGAAAATAAACATTACCAAAACAGAAGTACAAGCCATAAGCAAACAACCTCAATTACTTAAAATATAAACATCCGAGGAGAACAGCTAAAACAAGTAGATAAGTTCACTTACCTTGGAGGAACAATAAGCCAGACAGGACCCTGCTCGGAAGATAGAGGTACAACACCGCATTAGGAAGGCAATAGGAGCATTTAAAGCACTCGAAAAAAATCTGGGAATC	25877	NW_022145595.1:13520749-13521119	NW_022145595.1	13520749	13521119	LOC115921858	0	GATTCCCAGATTTTTTTCGAGTGCTTTAAATGCTCCTATTGCCTTCCTAATGCGGTGTTGTACCTCTATCTTCCGAGCAGGGTCCTGTCTGGCTTATTGTTCCTCCAAGGTAAGTGAACTTATCTACTTGTTTTAGCTGTTCTCCTCggatgtttatattttaagtaATTGAGGTTGTTTGCTTATGGCTTGTACTTCTGTTttggtaatgtttattttcagtcCAAAGTTTGAGCTGCTCTGATGTATTAGGTCAACTAGTGTTTAAAGGTCTCTATCATTGTCAGCTATAAGGACATGGTCGTCAGCAAATCCTAGGTTGTTGATTATCTGTCCCTGTACTCTTACGCCAATATTGGTGTCGTGTAAT
Scaffold103:769884-770176	Scaffold103	769884	770176	WHL22.11422	SPU_028047	TGCCCCCAAGTTCATGGAATGACCCATATATACATGTACCTGTAGGTACCTTGCACTCAGCAGAACATTTTTTTAAACGTATGATGTCATTGTTAGGGGATTCCCAATTTTCCCAATTATGTGTAGGCTACCGTGTAGTTGTACACGTACACTGTACATGAAATAAACACCTTCCTACATGTTTTCTTCTTCCAGTGCTTTGTAGTGTAAACTTATAGTTTTCTTTTCTCAGACTCTGCTCAACTGACTGCACTCCTGCTATCAACTTGTAAACTTTTGAACTAGCTAAAGT	0	NW_022145595.1:13486356-13486648	NW_022145595.1	13486356	13486648	LOC100891130	0	ACTATAGCTAGTTCAAACGTTTATAAGTTGATAGCAGGAGTGCAGTCAGTTGAGCAGAGTCTGAGAAAAGAAaactataagtttacactacaAAGCACTGGAAGAAGGAAACATGTAGGAAGGTGTTTatttcatgtacagtgtacgtGTACAACTACACGGTAGCCTACACATAATTGGGAAAATTGGGAATCCCCTAACAATGACATCAtacgtttaaaaaaatgttctgCTGAGTGCAAGGTacctacaggtacatgtatatatgggtCATTCCATGAACTTGGGGGCA
Scaffold103:780267-780657	Scaffold103	780267	780657	WHL22.11422	SPU_028047	TAAGTGAAAGGAGTCCTGAAAGGCACAGAAAATACAAACACACTGGAAATGATGGAGAGAAAACTAGACACAAACGGAAGTATGTATCAGGCTCGGAGAGTGATATTGATAGTGACAGAGGAGAGCATGTTCGTGAACCAGGGAGTAAATTCAAACATTACAAACAATTCTCGCGATTTAACAAAGGGTATGACTGGAGATCAGCTAAGAGTGGGCCATTCAGACCCGGCTCTGGAATGAGGTCTCGCACCCCTTCCCAGAGGTTTGATTACAGGAAATACATATATCCTGGAAACTTGGGAAAGCCTTATGGAAACCAAAAAACAGTTGGTAGTGGAAGAGGGAGGGGATTCTCACGAGGACGTGCACATCTCCCTGGTCTTTGGAGGG	0	NW_022145595.1:13475786-13476176	NW_022145595.1	13475786	13476176	LOC100891130	0	CCCTCCAAAGACCAGGGAGATGTGCACGTCCTCGTGAGAATCCCCTCCCTCTTCCACTACCAACTGTTTTTTGGTTTCCATAAGGCTTTCCCAAGTTTCCAGGATATATGTATTTCCTGTAATCAAACCTCTGGGAAGGGGTACGAGACCTCATTCCAGAGCCGGGTCTGAATGGCCCACTCTTAGCTGATCTCCAGTCATACCCTTTGTTAAATCGCGAGAATtgtttgtaatgtttgaatttaCTCCCTGGTTCACGAACATGCTCTCCTCTGTCACTATCAATATCACTCTCCGAGCCTGATACATACTTCCGTTTGTGTCTAGTTTTCTCTCCATCATTTCTAGTGTGTTTGTATTTTCTGTGCCTTTCAGGACTCCTTTCACTTA
Scaffold103:796775-797291	Scaffold103	796775	797291	WHL22.12203	SPU_022779	TAAGAAGGTGAAATTTTCCCTTTATTTTGCCATCACTACATCTTTTAATAGCTTTAGTACAAAAGCTAGCAGATACAATGTAGATTGAGTAATTCACCACATTCAGTAGTTGCAGAACATGCCCTAAGTGTGTACCAATCATGGGTGTTGATCTGTAACTGATACCTATTCATCAGGGGGGGATGATCTATTCATTCATCCCCCCTGATGAATAGGTATTACGTAAGGATCGACACCCATGGTACCAATCATCTATATTTAAACAAATTGTGTACCTTAGAGTGTATAGAATCAACCTATAAAAAAAAAAATTATCCACAATATTTTAGGCTAAAATAGTTGAGGAGTACCGGTATGAAGAAAATAAAGAAACATAAAACTTGATTTATTTTCTTCATA…	4066	NW_022145595.1:13458782-13459298	NW_022145595.1	13458782	13459298	LOC752586	0	CAGCCATGCAAACAACAAGGTCAAGTCCAAGGATGACTGAGGAAACGTCCCAGATGCAAAGAATcaacctataaaaaaaaaaattatccacaATATTTTAGACTAACAGTagaggagtatgaagaaaataaatcaagttttatgtttctttattttcttcataccgGTACTCCTCAACTATTTTAGCCTAAAATATtgtggataatttttttttttataggttgATTCTATACACTCTAAGGTacacaatttgtttaaatatagaTGATTGgtaccatgggtgtcgatccttacgtaatacctattcatcaggggggatgaatgaatagatcatccccccctgatgaataggtatcagttacagaTCAACACCCATGATTGGTACACACTTAGGGCATG…
Scaffold103:841691-842067	Scaffold103	841691	842067	WHL22.12209	SPU_013409	CTATAGATCAATTTTTATTTTAATCTGTTGGATTATGCAAATGGTTTTATTTCCTTCATAGAAACTTTCTTAAATCTTACTGGAGGAGAAGACAAATAAGCAGTTGTTTAGAGTTATAATGATTAGAATATTTCTTCTTTATCCAGGTTAGCCTCTTCAGAATATGTATTTTTTCTCCCATAGGGCCTTGCAATCATATGATATTAGATTTTAATCTTGGAATTATCCTACATAATTTCTCAGTGAGCAGCTAAAAATCTTAAATATAATCTGTATTTTCTTCTTTTAGGTTGGTCTGCAGAGTGAAGATAATGGGGAGAATGATGGTTTATCCTCTGATGTGATATCAACAGGTTTGTGAATGTTTCCATACATG	2079	NW_022145614.1:433733-434109	NW_022145614.1	433733	434109	LOC591088	0	CTATagatcaatttttattttaatctgtTGGATTATGCAAATGGTTTTATTTCCTTCATAGAAACTTTCTTAAATCTTACTGGAGGAGAAGACAAATAAGCAGTTGTTTAGAGTTATAATGATTagaatatttcttctttatccAGGTTAGCCTCTTcagaatatgtattttttctcCCATAGGGCCTTGCAATCATATGATATTAGATTTTAATCTTGGAATTATCCTACATAATTTCTCAGTGAGCAGCTAAAAATCTTAAATATAAtctgtattttcttcttttaggtTGGTCTGCAGAGTGAAGATAATGGGGAGAATGATGGTTTATCCTCTGATGTGATATCAACAGGTTTGTGAATGTTTCCATACATG
Scaffold103:886697-887104	Scaffold103	886697	887104	WHL22.11541	SPU_018680	GCCTGATGGGAGGGGGGGGGGGGGGGTGTTGCAACCCCGACACCTCCCTCTAGTGACGCCCCTGCATGTAACAGCAATCAAATAACAATCCCTTTTTGTTTTTGTTAAATTTGAATAATATTTTGCCTTTTGTGACGTTTCATGAAATCAGTAAACATAATATTTGATGATATTGTGAGAAGTTGACAATATTTATGCACAGTCAATGTGATGTAAAATATTCTAAATAAAAGAGTTCTTGTTGTTGTTTTCAACCTCATTCAAAACAATTTACTGTATATTCCATCCGAACACATGTAATGAATATTGTCTGCATAACTTTGAATCTGATGGAGATGACTTCATTAAAATGTGAACCTGTTTGTCATTCTCAATAGATTCTGGACTCTATAGATGTGG…	0	NW_022145606.1:45284740-45285166	NW_022145606.1	45284740	45285166	LOC100892554	0	gcctgatgggggggggggggggggggggggggggtgttccaaCCCCGACACCCcctctagcgacgcccctgcatgtAACATCAATCAAATAACAatccctttttgtttttgttaaatttgaataatattttgccttttgtgacgtttcatgaaatcagtaaacataatatttaatgatattgtGAGAAGTTGACAATATTTATGCACAGTCAATGTGATGTAAAATATTCTAAATAAAAGAGTTCTTGTTGTTATTTTCAACCtcattcaaaacaaattactgTGTATTCCATCAGATCACATGTAATGAATATTGTCTGCATAACTTTGAATCTGATGGAGATGAATTcattaaaatgattataacaatgTGAACCTGTTTGTCATTCTCAATAGATT…
Scaffold103:889051-889352	Scaffold103	889051	889352	WHL22.11541	SPU_018680	TCCCATACCAGAGCAATATCCCACGTGACCAAGAATACAAAGAATGCATAACTACATGTATATATAGAAAAAGGGATATTTCAAAAGGTTCACAAGACCGACAGCCTATGATCCCTACAAAACAAAGAATTACATAAAGGAAGATAGACATGTCATGGGGTGTGTTGGTCTCACGGGTCATTGTCTAGATGAACCTTCTGAAAAGTGTCTTTGTGTCGGTCTCGTGAGCTGATGGTCTAGTGAACTCTCAGAATAGTTGACAAAAGGATTGCGAGACCGACTATGTCAGTCTAATTGGCTG	0	NW_022145606.1:45233640-45233941	NW_022145606.1	45233640	45233941	LOC753938	0	TCCCATACCAGAGCAATATCCCACGTGACCAAGAATACAAAGAAtgcataactacatgtatatatagaaaAAGGGATATTTCAAAAGGTTCACAAGACCGACAGCCTATGATCCctacaaaacaaagaattacataaaggAAGATAGACATGTCATGGGGTGTGTTGGTCTCACGGGTCATTGTCTAGATGAACCTTCTGAAAAGTGTCTTTGTGTCGGTCTCGTGAGCTGATGGTCTAGTGAACTCTCAGAATAGTTGACAAAAGGATTGCGAGACCGACTATGTCAGTCTAATTGGCTG
Scaffold1030:104921-105246	Scaffold1030	104921	105246	WHL22.12691	SPU_025515	CGTCGGGTAGGAACATTTACCAACGATTGGAGATGGTGCATACATTGCGGATATTAATCTAATAAATAGAATTAAAAAGTTTGTAAACTATTAGAGCCATGTTGTTATATTATATAACTCCTAAGGCGGATCGGGATTCGCACTATACTGAGGTTTTGGTGTGTTTAATCGGGTTTTTACAGACGTGTATCAATCAGATATGATTATTTACGTCTGGGGGGGCCAACCTTTAACGTCACCATCCACTGAGGTGCTAGACCAAGTACTATTCATATAGGCCTACTTGGGGTAGATAAAAGTAGACACATATTGTGGATGGATGAAG	6124	NW_022145613.1:18128592-18128917	NW_022145613.1	18128592	18128917	LOC115918074	4354	CGTCGGGTAGGAACATTTACCAACGATTGGAGATGGTGCATACATTGCGGATATTAATCTAATAAATAGAATTAAAAAGTTTGTAAACTATTAGAGCCATGTTGTTATATTATATAACTCCTAAGGCGGATCGGGATTCGCACTATACTGAGGTTTTGGTGTGTTTAAtcgggtttttacagacgtgtatcaatcagatatgattatttacgtctgggggggccaacctttaacgtcaccatccactGAGGTGCTAGACCAAGTACTattcatataggcctacttgGGGTAGATAAAAGTAGACACATATTGTGGATGGATGAAG
Scaffold1030:105461-105602	Scaffold1030	105461	105602	WHL22.12691	SPU_025515	TCTGTTCCCTTTTCCCACCTATATCTATCTATTCACTATTCGTATAGAGTAGGGGGAAACCCCGGTGCAGTGGTCAAACTGCACACCCCAAATCAGTTATACCAGGAGGAGAGACCCGAGGGTTACAGTGCCAATGATTCA	6664	NW_022145613.1:18129132-18129273	NW_022145613.1	18129132	18129273	LOC115918074	4894	tctgttccctTTTCCCACCTATATCTATCTATTCACTATTCGTatagagtagggggaaaccccggtgcaGTGGTCAAACTGCACACCCCAAATCAGTTATACCAggaggagagacccgagggttacAGTGCCAatgattca
Scaffold1030:106209-106558	Scaffold1030	106209	106558	WHL22.12691	SPU_025515	GCACACGAGAAGTCATTTCAATGAAAATGATAGTGGTTCCTTATATAGAAATATCAGACTTGGCACTCCTGGCACCCAACAATTAATATCCACCTTACCTGGGTCAAGCGTGGCAAATATAAAACTAATCTCTTGCCAAAGGAGAATAGTGACGCGGCGGGACTCGAACCGCAAATCATTGTGATCCATAGTCCGGTGACAACACCTCCACATAATATTTGCGTCATTATCTATAAAAGAAATCAATGTAGGGGGCCTACGCACCTGTATTTGCATGCGAGGTAGGCATTCGTTGCGCATTCACCTTTCATACAATATTACTCTCACACGGTGCGTTATGGACTGCGCC	7412	NW_022145613.1:18129880-18130229	NW_022145613.1	18129880	18130229	LOC115918074	5642	GCACACGAGAAGtcatttcaatgaaaatgatagtGGTTCCTTATATAGAAATATCAGACTTGGCACTCCTGGCACCCAACAATTAATATCCACCTTACCTGGGTCAAGCGTGGCAAATATAAAACTAATCTCTTGCCAAAGGAGAATAGTgacgcggcgggactcgaaccgcaaatCATTGTGATCCATAGTCCGGTGACAACACCTCCACATAATATTTGCGTCATTATCTATAAAAGAAATCAATGTAGGGGGCCTACGCACCTGTATTTGCATGCGAGGTAGGCATTCGTTGCGCATTCACCTTTCATACAATATTACTCTCACACGGTGCGTTATGGACTGCGCC
Scaffold1030:106951-107278	Scaffold1030	106951	107278	WHL22.12691	SPU_025515	GGCAAATGAGTTGCGATTAATATCAACTCTTTGAAAGACGGGGGCCCTGGTGTGTGTCTCGTCTACGTAACTGGAGTGATGTCAGCTCGATACACGTTTTTTTTTCTTTCTAGAATAAGTCCTCACGTTTGCTGACGAAAGATGAGTATAAGGGCTTAGGAGAGAAATAGGATCAGGTACAAATTGTCCCGTGCTTATTGTTCGTTTATAGGTGTGACTTGAAAGGTCGAAGCTTGATGACGTCAGCACAACAGAAATGCTCTTGAATGTGTTTCTCCAGTGTATTGTCAAGTTGACGACTTGGACATACTTTATGGAAATGTTAAG	8154	NW_022145613.1:18130623-18130950	NW_022145613.1	18130623	18130950	LOC115918074	6385	GGCAAatgagttgcgattaatatcaactctttgaaAGACGGGGGCCCTGGTGTGTGTCTCGTCTACGTAACTGGAGTGATGTCAGCTCGatacacgtttttttttctttctagaatAAGTCCTCACGTTTGCTGACGAAAGATGAGTATAAGGGCTTAGGAGAGAAATAGGATCAGGTACAAATTGTCCCGTGCTTATTGTTCGTTTATAGGTGTGACTTGAAAGGTCGAAGCTTGATGACGTCAGCACAACAGAAATGCTCTTGAATGTGTTTCTCCAGTGTATTGTCAAGTTGACGACTTGGACATACTTTATGGAAATGTTAAG
Scaffold1030:108254-108629	Scaffold1030	108254	108629	WHL22.12691	SPU_025515	GAGCCCCAGATGGTCTGTGGTTAAGCATGTACAATATACACGTGACAATGACCTCTGCGTGGGTGTATGGTGATTATAATAGTTCAGTACAAAAGGGATTTAACAGTTTTTTTTCTAGAATATCCGCCCTTGAAGACGTAAGTGCAATTTCTTTAAAACCCACGCCCTGAGTAACAAGGGTAAAATAGATTATACGGCATAATTGATTTCATGTTTCGTGGTCACCTTTTCCGACTTTGAGAAGGCACATATGCTTGTAGATAAGCCCCACCCCTAAACACAGGAATTACGGTTTTAAGACTTGTCCGATAAATTTGCATATAAGGATCAATGTTTTCCACAGGTTAAAAATTCATCGATTAGGTTTCTAACACG	9457	NW_022145613.1:18131926-18132301	NW_022145613.1	18131926	18132301	LOC115918074	7688	GAGCCCCAGATGGTCTGTGGTTAAGCATGTACAATATACACGTGACAATGACCTCTGCGTGGGTGTATGGTGATTATAATAGTTCAGTACAAAAGGGatttaacagttttttttctaGAATATCCGCCCTTGAAGACGTAAgtgcaatttctttaaaacccACGCCCTGAGTAACAAGGGTAAAATAGATTATACGGCataattgatttcatgtttcgTGGTCACCTTTTCCGACTTTGAGAAGGCACATATGCTTGTAGATAAGCCCCACCCCTAAACACAGGAATTACGGTTTTAAGACTTGTCcgataaatttgcatataaggATCAATGTTTTCCACAGGTTAAAAATTCATCGATTAGGTTTCTAACACG
Scaffold1030:112101-112454	Scaffold1030	112101	112454	WHL22.12691	SPU_025515	CGGGATAGAGTAGGAAAGAAAGGAAGCATCGGGGAAAGAGGGAGGCGAAGAATATGACGAAATAATACAGAAAACGAAGAAAGAGAAATAATGAGTGGAAAGGTAAATAAAAGGAATCAACCTGCAGTTGCCAGATGATAATGGACACAATCGATTATGGTTGAATTGTAGGTCATGTGTACATTGCTTTCCAGTTTTAATGAGTTCAATGGGGAAGAAGAAGATTTAAAGTCAATATTTGAAATCATTCTTAAGATGCTTTGCGCAGTCAGCAAAGATTACAGTCCAATAACAGCGTCGCATGGTTATGATTCAGATAATCACAGTGTGGAAAAATATTGTCTTTGAATATT	13304	NW_022145613.1:18136079-18136429	NW_022145613.1	18136079	18136429	LOC115918074	11841	CGGGATAGactaggaaagaaaggaagcaTCGGGGAAAGAGGGAGGCGAAGAATATGACGAAATAATACAGAAaacgaagaaagagaaataatgagTGGAAAGGTAAATAAAAGGAATCAACCTGCAGTTGCCAGATGATAATGGACACAATCGATTATGGTTGAATTGTAGGTCATGTGTACATTGCTTTCCAGTTTTAATGAGTTCAATGGGGAAGAAGAAGATTTaaagtcaatatttgaaatcatTCTTAAGATGCTTTGCGCAGTCAGCAAAGATTACAGTCCAATAACAGCGTCGCATGGTTATGATTCAGATAATCACAGTGTGGAAAAATTGTcttgaatatt
Scaffold1030:286300-286734	Scaffold1030	286300	286734	WHL22.11612	SPU_005602	TTCCAGGAGGTCTGTCCTTCAAAATATTGATTGCTAAAATAAAGAGAAGGTGAGGGAGAAAGTAGAAATTAAAGTCATAAAATCAGAATGTATTAATTATTGGCCAAATTTGTTATCATTTTGACGACTTCAGAACCATGCAGTACCCACCAATACTGATATGCTATATGATCAACCTTTTTTGATCCATTCCACACTGTTTCTTTCACAATGTTTCTTTCACAATGCAATCGCATGACCAGAATTCAACTTTATCTTTAACCCTAGGCTGTGAACATTTTATATACCTCTAACCCATAGATACCCTCCAACAATTCCTTCCCTTATTCCCTAATCAATTTCCATCCTCTCTACATCCTTTCCTCTTCCTTCTTGCATCACTTCTGTCTCCAGAGAGGG…	0	NW_022145613.1:18302290-18302724	NW_022145613.1	18302290	18302724	LOC115919752	0	TTCCAGGAGGTCTGTCCTTCAAAATATTGATTGCTAAAATAAAGAGAAGGTGAGGGAGAAAGTAGAAATTAAAGTCATAAAATCAGAATGTATTAATTATtggccaaatttgttatcattttgacgaCTTCAGAACCATGCAGTACCCACCAATACTgatatgctatatgatcaaccttttttgatccattccacactgtttctttcacaatgtttctttcacaatgcaatcgcatgaccagaattcaactttatctttaaccctaGGCTGTGAACATTTTATATACCTCTAACCCATAGATACCCTCCAACAATTCCTTCCCTTATTCCCTAATCAATTTCCATCCTCTCTACATcctttcctcttccttcttGCATCACTTCTGTCTCCAGAGAGGG…
Scaffold1030:299399-299610	Scaffold1030	299399	299610	WHL22.11612	SPU_005602	CCCTTTCCCCCTTGAGTATAATTATGATGTAATACCTTTTGGTATCACTTGAAATAAAATCATTCCTAGTATGAACACACAAACACATGCACTAATGTATAAATAGGCTTGGTGTGGGGTGAAACAGTGCCTTTGAATTGGTGTTGAAAACCGATCGGTTCATTGTATTCAAGAAAGTGTCAAGGATCTATTCTTTTCCACCTTGTCCAAG	0	NW_022145613.1:18314971-18315182	NW_022145613.1	18314971	18315182	LOC115919752	0	CCCTTTCCCCCTTgagtataattatgatgtaaTACCTTTTGGTATCacttgaaataaaatcattccTAGTATGaacacacaaacacatgcaCTAATGTATAAATAGGCTTGGTGTGGGGTGAAACAGTGCCTTTGAATTGGTGTTGAAAACCGATCGGTTCATTGTATTCAAGAAAGTGTCAAGGATCTATTCTTTTCCACCTTGTCCAAG
Scaffold1030:313893-314522	Scaffold1030	313893	314522	WHL22.11612	SPU_005602	ATGTCATATTAAGTTTCTGAAGAGCAAAACTGGAATAGTAACCCACTGCATAAGATTTGATTTGATTTGATTTCGGTGTAAACATTGCATTTTGCATAGATTGCAGCTCAAGTTATCAAGTTGGTGCTGATATTCAACAAGTTAACAAAGTATACTTTTATCAATGCAATCTTTTAAGTCTCCAAATTTTGCCCACAACTTTAAACAAAGTTGTCAGTTAGAATGGCTGACAATTACAAGACATGCCTAAATTCACCTAAAAGGGCCTTATGACTAAGCCTTCCCATTGTGGTTTGAGGATGAAGCTAAGATGAAACTTCCGGACCTGATCAATATTTTACCTACCACCCCTCTCACTATACACAGCCTACAAAATAGAAAGTGGATTCTGAAGAGGTT…	0	NW_022145613.1:18329295-18330384	NW_022145613.1	18329295	18330384	LOC115919752	5545	ATGTCATATTAAGTTTCTGAAGAGCAAAACTGGGATAGTAACCCACTGcataagatttgatttgatttgatttgatttcggTGTAAACATTGCATTTTGCATAGATTGCAGCTCAAGTTATCAAGTTGGTGCTGATATTCAACAAGTTAACAAAGTATACTTTTATCAATGCAATCTtttaagaccccgttctcattcacttcgttggagcggtctaactaagacccgttcctcaggagcagttcttaggtgagtgagaacagtcaaagtggtccaggaagtggacttctggaccgctccagaagaccacctcgggaggtggtcttgaggaacgggtcttattaagagcggtttggacggctctaacgtgcaatgtgaatgGAAGCGTACTTTGaccgg…
Scaffold1030:316287-316879	Scaffold1030	316287	316879	WHL22.11612	SPU_005602	CCAGAACCTTGCAGTACACACCAATACTTATGTGCTAGATGATCAACCTAATACCTTTTCTGATCGATTCCACAACGTTTCTTTCACAATGCAATCGCATGACCATAACGGGTCTTTATCTTTAAGGACCTGGTCTATAATCTTGTAACAACCAGAGTACTGACTACCTTGTAGGTCTGATAACAAGCTGAAGACAGGAGAGCTAAGACCTTTTTAATCTCCCAACAATAGACTAAGGAGAAAAGGATCGACACACATAACTATTATGAAAGGAATTACAGGTACTTGGACTTGACATGTACATCAGAGGGACTCCCTACTGTGTTCTGAATAAAAGGGGACAGAGGAAGTACCCAACTTAAGGATAGAGGCACTATTCAGGCTAATTTCAGGATAGGG…	0	NW_022145613.1:17514076-17514668	NW_022145613.1	17514076	17514668	LOC115919937	0	ccagaaccttgcagtacacaccaatacttatgtgctagatgatcaacctaataccttttctgatcgattccacaacgtttctttcacaatgcaatcgcatgaccataacgggtctttatctttaaggaccTGGTCTATAATCTTGTAACAACCAGAGTACTGACTACCTTGTAGGTCTGATAACAAGCTGAAGACAGGAGAGCTAAGACCTTTTTAATCTCCCAACAATAGACTAAGGAGAAAAGGATCGACACACATAACTATTATGAAAGGAATTACAGGTACTTGGACTTGACATGTACATCAGAGGGACTCCCTACTGTGTTCTGAATAAAAGGGGACAGAGGAAGTACCCAACTTAAGGATAGAGGCACTATTCAGGCTAATTTCAGGATAGGG…
Scaffold1030:317421-317916	Scaffold1030	317421	317916	WHL22.11612	SPU_005602	GAGGAGCCGACTCAAAAGATCTACAAGTTCCAGGACTAAAAAAGTAATTAGTTCTAAAGAAGGTCCAGGATCTGGGCAGAAGCTTTTTTGTCCGAAGGGGGAACAAAATAAGAACTTAATTGAAAGGTGAGGATTGGACTGCTCTTGCAATTAAAGCCATTGATAATCTCAGATTGGGATAGTAGTCTTAAAACAGGGATTAAGAACTTATGAAGAGACACCTAGATGAGGTGAGAATAGATGTGTTGATAAACAGCTGGCCAAAGAACTTCAATAGATGGGATTACTCATTGAATGAGTCATAGAGGGGGATGGGCACAAGGGGGGGGGGGGGCTGTATCTGTATTATTAACCTTACATATAACACATAAAATTGAGCTAAGGTAAAAGAAAATCAAA…	0	NW_022145613.1:18333304-18333804	NW_022145613.1	18333304	18333804	LOC579673	9389	GAGGAGCCGACTCAAAAGATCTACAAGTTCCAGGACTAAAAAAGTAATTAGTTCTAAAGAAGATCCAGGATCTGGGCAGAAGCTTTTTTGTCCGAAGGAGGAACAAAATAAGAACTTAATTGAAAGGTGAGGATTGGACTGCTCTTGCAATTAAAGTCATTGATAATCTCAGATTGGGATAGTAGTCTTAAAACAGGGATTAAGAACTTATGAAGAGACACCTAGATGAGGTGAGAATAGGTGGGTTGATAAACAGCTGGCCAAAGAACTTCAATAGATGGGGATTACTCATTGAATGAGTCATAGAGGGGGAGCCGgggcacagggggggggggggggctgtttctGTATTATTAACCTTACATATAACACATAAAATTGAGCTAaggtaaaagaaaa…
Scaffold1030:319760-319999	Scaffold1030	319760	319999	WHL22.11612	SPU_005602	GCTTGATATTAGAGACCAACAGGAAATGGCAAATTTGACCAAATGTCATAAAAAGAGGTTTCAAGTACTAGTATTACTGAATCTAACTTTTGGAGGGGATTAATTAGAGCAGTATTGTGATCTGCAATACAAGCATCTCAATCTGACAAACAGTCGGAGTGGCTGCTTGCAGCTGCTAGCTAGTCTTAATACCACAGCTCCTTTGTCTGGTGATATATGTAATGAGGCAAGTATCGGGG	0	NW_022145613.1:18335742-18335982	NW_022145613.1	18335742	18335982	LOC579673	7211	GCTTGATATTAGAGACCAACaggaaatggcaaatttgacCAAATGTCATAAAAAGAGGTTTCAAGTACTAGTATTACTGAATCTAACTTTTCGAGGGGATTAATTAGAGCAGTATTGTGATCTGCAATACAAGCATCTCAATCTGACAAACAGTCGGAGTGGCTGCTTGCAGCTGCTAGCTAGTCTTAATACCACAGCTCCTTTGTCTGGTGATATATGTAATGAGGCAAGTTATCGGGG
Scaffold1030:375782-376053	Scaffold1030	375782	376053	WHL22.11612	SPU_005602	TATTTCTACCCCTTTCAAGTAATTGCACATGTACTGTATGTACAAGTGTATTTTTGACAGGTACAACTTGGGGGTGTAAAAGAGAGCGCTGAGAAGAGTAAGCACGTGCCTAAGAAGATTTGATTTCTTTTGTTCAGACTAAGCCCCATTCAAGTTGGGCAATGACCCTGTTTTAAAGCATGCATGGAACTTGAAATAGAAGTAGAATCGGTATGGGGTAGCCCTAAAGCACTGGGTGACTGTATACAATGTAGTGAGAGTCGGTTCATTA	0	NW_022145613.1:17571489-17571761	NW_022145613.1	17571489	17571761	LOC115918345	6384	TATTTCTACCCCTTTCAAGTAATTGCACACGTACTGTATGTACAAGTGTATTTTTGACAGGTACAACTTGGGGGTGTAAAAGAGAGCGCTGAGAAGAGTAAGCACGTGCCTAAGAAgatttgatttcttttgttcCGGACTAAGCCCCATTCAAGTTGGGCAATGACCCTGTTTTAAAGCATGCATGGAACTTGAAATAGAAGTAGAATCGGTATGGGGTAGGCCTAAAGCACTGGGTGACTGTATACATTGTAGTGAGAGTCGGTTCATTA
Scaffold1030:64337-64669	Scaffold1030	64337	64669	WHL22.12691	SPU_025515	AAGAATGACGAATAGGATGGGCTTCCAAAGGGGGAAAGTAAAATACTTGAATCACCTAACAACTGGACAGACTTAAACATGTATTCGAGCATTCTGGAAAAGGGGAAATCCCCTTTGACGTAATACGTGGGAAATGTGTTACTGCTGCCACCTCACAACTCCTATTTCTACCATAGTTGTTTTCTACGTCCCCCATTGTGAATTTTCAGGAAAATCCTTATGTTATCAATAAGTATAATCTCATTTGACGAGAAATATGACAAATAAAAAGGAAAAGAACTATTTTGATACCGACTAGGTGGTTCAGTAAAGGTTATCAAGATAATGTGTCC	0	NW_022145613.1:18092461-18092793	NW_022145613.1	18092461	18092793	LOC115918074	0	AAGAATGACGAATAGGATGGGCTTCCAAAGGGGGAAAGTAAAATACTTGAATCACCTAACAACTGGACAGACTTAAACATGTATTCGAGCATTCTGGAAAAGGGGAAATCCCCTTTGACGTAATACGTGGGAAATGTGTTACTGCTGCCACCTCACAACTCCTATTTCTACCATAGTTGTTTTCTACGTCCCCCATTGtgaattttcaggaaaatccTTATGTTATCAATAAGTATAATCTCATTTGACGagaaatatgacaaataaaaaggaaaagaactaTTTTGATACCGACTAGGTGGTTCAGTAAAGGTTATCAAGATAATGTGTCC
Scaffold1030:65110-65744	Scaffold1030	65110	65744	WHL22.12691	SPU_025515	AACGTAATTAGGTTTTGCCCTAAGTATAAAATGAAATCGCGGGTACCTAAATTTAAGTTGAAAGGTTGGACTTTCAGTGCTCCTCTTAGAAAAACCTGGATTAGACAATTTGTATAAAGGTAGTATCATCACGTCATGAGTATACCTTAGCTGTCACCACTGATTATAGTTTTAGTTTAATCTTCCAAAGCCAAGTCCCCTTTCCATCGATTATGAAAAGTTCAATAGAAAGAGAGGGCGTCCCAAGGACAGAGTCAGGTTAATCTCGGGAGCATGAATACAGGCCCAGGGATTAGATCAGGTGATCGGGAATGCCTTATCACCTTCCATCGATTCTCTGACGTGACGTCAACAATCATAAACAAAAGGCATACTCCCCCTGATATCCTCGCCTATACT…	0	NW_022145613.1:18093234-18093868	NW_022145613.1	18093234	18093868	LOC115918074	0	AACGTAATTAGGTTTTGCCCTAAGTATAAAATGAAATCGCGGGTACCTAAATTTAAGTTGAAAGGTTGGACTTTCAGTGCTCCTCTTAGAAAAACCTGGATTAGACAATTTGTATAAAGGTAGTATCATCACGTCATGAGTATACCTTAGCTGTCACCACTGATTATAGTTTTAGTTTAATCTTCCAAAGCCAAGTCCCCTTTCCATCGATTATGAAAAGTTCAATAGAAAGAGAGGGCGTCCCAAGGACAGAGTCAGGTTAATCTCGGGAGCATGAATACAGGCCCAGGGATTAGATCAGGTGATCGGGAATGCCTTATCACCTTCCATCGATTCTCTGACGTGACGTCAACAATCATAAACAAAAGGCATACTCCCCCTGATATCCTCGCCTATACT…
Scaffold1030:67052-67317	Scaffold1030	67052	67317	WHL22.12691	SPU_025515	AGTACAGGTTTCTTCTAAAGCGGCCGAGTACGCATTTCGAGCACTTCTCTCCATTGCTGCAGGGATTCGCCAATTTGCGTTGAGCGGAAGTAGCGTTCAGAATGTTCCGATCGGACAAACAAACAACGGGCGGGGCTTGAAACATTGATCTCTCTAAATCTATATTATTATCACCTAAGTGGGAGGGGCTCAAATAAGTCGTTTTCCCCTCAAGATGTATTAATCCCTTAGGATTTAAGACCAATATACGACATGTTTGAAATCC	0	NW_022145613.1:18095175-18095440	NW_022145613.1	18095175	18095440	LOC115918074	0	AGTACAGGTTTCTTCTAAAGCGGCCGAGTACGCATTTCGAGCACTTCTCTCCATTGCTGCAGGGATTCGCCAATTTGCGTTGAGCGGAAGTAGCGTTCAGAATGTTCCGATCGGACAAACAAACAACGGGCGGGGCTTGAAACATTGATCTCTCTAAATCTATATTATTATCACCTAAGTGGGAGGGGCTCAAATAAGTCGTTTTCCCCTCAAGATGTATTAATCCCTTAGGATTTAAGACCAATATACGACATGTTTGAAATCC
Scaffold1030:73323-73461	Scaffold1030	73323	73461	WHL22.12691	SPU_025515	ACAGCCGCCCAAAGAGTACGCCCCTTTATATACACCCTCCCCGCCCATCGCGCACACAATGTCATGTTTAATAGCTCAAGACAGTGACATAGCCAACAACAGCGTGGACAAGACCTTAATGGAAGGGGGCGGGTGTGA	0	NW_022145613.1:18101433-18101571	NW_022145613.1	18101433	18101571	LOC115918074	0	ACAGCCGCCCAAAGAGTACGCCCCTTTATATACACCCTCCCCGCCCATCGCGCACACAATGTCATGTTTAATAGCTCAAGACAGTGACATAGCCAACAACAGCGTGGACAAGACCTTAATGGAAGGGGGCGGGTGTGA
Scaffold1030:73735-74114	Scaffold1030	73735	74114	WHL22.12691	SPU_025515	CCCATCATGATCGGATATATACATGTATGGATTCATTTAACGATACCATACGATATGGTATGTTTAAATCAAACACTATCAAATCCAATCATGTAATCCCGATTAAGAACTAAACAAAAATACCGTGCATAATAGTGCCATAGTATATTATTAAAAAAAGATAAAGAACAAAAAAGGAAATCACAAGTAAAGATCCAACTTAAACCAAATACAATAACCCCCATGTTTGAAGTGGGGCAACGAATAATAGAATGAAAATCCTTCCAATTTTATTACAGATAACCGGATATGTGACTGATCTCTACAAAACAAAACTCTGGATTTACCCGCTAACACTAACATTTACAGATCTGTCACCCTCTCAGTAATTCATTGTTGT	0	NW_022145613.1:17284764-17285143	NW_022145613.1	17284764	17285143	LOC580912	0	CCCATCATGAtcggatatatacatgtatggattCATTTAACGATACCATACGATATGGTATGTTTAAATCAAACACTATCAAATCCAATCATGTAATCCCGATTAAGAACTAAACAAAAATACCGTGCATAATAGTGCCATagtatattattaaaaaaagataaagaacaaaaaaggaaatcacAAGTAAAGATCCAACTTAAACCAAATACAATAACCCCCATGTTTGAAGTGGGGCAACGAATAATAGAATGAAAATCCTTCCAATTTTATTACAGATAACCGGATATGTGACTGATCTCTACAAAACAAAACTCTGGATTTACCCGCTAACACTAACATTTACAGATCTGTCACCCTCTCAGTAAttcattgttgt
Scaffold1030:75846-76234	Scaffold1030	75846	76234	WHL22.12691	SPU_025515	CCCAATATATGATATGGGATATCATTCATCTTTTTTTTCAAAATAGACTCGAAAGCGACTTTTAGATCTTTAGATTCGAAAAACAGATAATATGATAATAATGATAATAATGATAATAATAATGATAATAACATTGATAACAGATGGATTTATTTAGTACAACACAGATTAGGCGCATAAAATCTAAGGAATTTCTTCCTACCAATTACATCACTTGGATGGAGAATAACAAATGTAGGAAAACTTCTCGCAAAAGTGTTAAGAATTGTGTTTTAATGAAATTTGCCTAATATTACCTTAAAACGCCAAGAGATATAGTGGGGAAACTCATTTTAGTATGATTTCAAAAACAATCAAGGCCTACTCAGCGAGACATTTTAAAATGTGA	0	NW_022145613.1:18103995-18104364	NW_022145613.1	18103995	18104364	LOC115918074	0	CCCAATACGATATGGGCTatcatatatctttttaaaaatagattcgAGAAAGATTTTTAGATCTTTAGATTCGAAAAAtagataatgattatgattttaataatactgataataataatgataataattataacactAATAATAGTTGGATTTATTAACCCAGGTTAGGCGCATATAATCTTCCTACCAATTACATCACTTTGATGgagaataacaaaataatgtaggAACATTTCTCGCAAAAGTGTTTAGAATtgtgttttaatgaaatttgaaatcatattaCATTAAAACGCCCAGAGATAGTGGAGAAACTCATTTTGGTATGATTTCAAAACAATCTACTCAACGAGACACTTGAATACgtaa
Scaffold1030:79520-80173	Scaffold1030	79520	80173	WHL22.12691	SPU_025515	GAATGATCTCACCGTCTATTCTCATATATTTATACGGCAATTTGATATAGCCTACGTAACAACTTGCATTGCATACTGTTAGTCGTTAACCCCTTTCTAATTCCATTCTACTCTCATTCTCAAGTCCTAAATTAAACGCTAATCAGGTGTCAACAATTCAACTTCCTTAGATTGGCAACCGCCGACGCATGTTTGGCGTCTTACTTCAGTCGATGTTTTTTCCGTCTGGTAATTAACGTCACGTTACAGTATAGCGGTAAATCTTGTTCAACCTAGCAGCTGATTATAAAAGTAGTTCAAATGCAAGTTTGTATAAGCTTAACAAGGGATGCCAACGTTTCAAAGCCATCAGGACAATAAAAGTCCCCTTATATCACGGATTTAATTTGCATATCATTA…	0	NW_022145613.1:17290549-17291202	NW_022145613.1	17290549	17291202	LOC580912	0	GAATGATCTCACCGTCTATTCTCATATATTTATACGGCAATTTGATATAGCCTACGTAACAACTTGCATTGCATACTGTTAGTCGTTAACCCCTTTCTAATTCCATTCTACTCTCATTCTCAAGTCCTAAATTAAACGCTAATCAGGTGTCAACAATTCAACTTCCTTAGATTGGCAACCGCCGACGCATGTTTGGCGTCTTACTTCAGTCGATGTTTTTTCCGTCTGGTAATTAACGTCACGTTACAGTATAGCGGTAAATCTTGTTCAACCTAGCAGCTGATTATAAAAGTAGTTCAAATGCAAGTTTGTATAAGCTTAACAAGGGATGCCAACGTTTCAAAGCCATCAGGACAATAAAAGTCCCCTTATATCACGGatttaatttgcatatcatta…
Scaffold1030:94985-95370	Scaffold1030	94985	95370	WHL22.12691	SPU_025515	CCCCCCCCCCTAAAAAAATTGAGGGGGGTACGTGCCCCCCCCCGTCCCCCCGGGATCGCCGCCCCTGACCGGGGGGGGGGGTTCTCTTTTTTATTCTGTATTTCCCCCTATATCGAGCGCAACACACACACATATTCACGTGAATTGTAGAACGTTTACTATGAAGCATTGGAAGGGTGTGTTTTAGAAGCTACATCCGAATTCGCCCTAGTAGTCTATCAATCATAAAAAACTTTTTTTTAATGGATTCTCTCGGATCACGTGACATGCGACCCCACATTAATTAATGTCCGGTCGGTCGGAAAGGCAGAAGCCGTGACGTCACGAATCTTTCTGACGTTACAGGGTCAATCCGTGTTATTTCCGTTTACTGCCCTTGCTCTCT	0	NW_022145613.1:18120362-18120740	NW_022145613.1	18120362	18120740	LOC115918074	0	cccccccccctaaaaaaaatgaggggggtacgtgcccccccccgtccccccgggatcgccgcccctgacctagggggggggggttctcttttttattctgtATTTCCCCCTATATCGAGcgcaacacacacacacacaaacacatattcacgtgaattttaGAACGTTTACTATGAAGGGTGTGTTTTAGAAGCTACATCCGAATTCGCCCTAGTAGTCTATTAatcataaaaaatactttttaatgGATTCTCTCGGATCACGTGACATGCGACCCCACATTAATTAATGTCCGGTCCGCAGAAGccgtgacgtcacgaatctTTCTGACGTTACAGGGTCAATCTGTGTTATTTCCGTTTACTGACCTTGCTCTCT
Scaffold1030:97271-97833	Scaffold1030	97271	97833	WHL22.12691	SPU_025515	GAAAGCGTTCGCGATATGTTGTATATCTATGAAATTTATTTAGATTTTTGAATAACAAAATACCGGTATGAGATGTATGCCACACATAGGAGCATCACTATCCTGGCTGTGTAGTAAAAGCTGTGCTTTGTATGCAGCCCTGCACATCAACAGGAATCAACTTATATTTGGACGTCACCCTATACCTTTTTCTTGCTTCATTGTGAGTTTTATTATTGTTCTTACCTTCCCAAAGTCTCTTAAAGGCAAAAAGCTCTTACAAGACCGGAACAATACGAACACCTGACTGGAATTACGGATTAACATCGGGTCCAGAATCAATAAAGGGATTAATGAAGGGATTAGTAAAGGGACTTGGGATCCTGGTATTTGGATGGGATTGGAAAGAATAGATGATTA…	0	NW_022145613.1:17305520-17306082	NW_022145613.1	17305520	17306082	LOC580912	0	GAAAGCGTTCGCGATATGTTGTATATCTATGaaatttatttagatttttgaataacaaaataccgGTATGAGATGTATgccacacataggagcatcactatcctggctgtgtagtaaaagctgtgctttgtatgcagccctgcacatcaacaggaatcaacttatatttggacgTCACCCTATACCTTTTTCTTGCTTCATTGTGAgttttattattgttcttaCCTTCCCAAAGTCTCTTAAAGGCAAAAAGCTCTTACAAGACCGGAACAATACGAACACCTGACTGGAATTACGGATTAACATCGGGTCCAGAATCAATAAAGGGATTAATGAAGGGATTAGTAAAGGGACTTGGGATCCTGGTATTTGGATGGGATTGGAAAGAATAGATGATTA…
Scaffold1030:97933-98282	Scaffold1030	97933	98282	WHL22.12691	SPU_025515	GTTTTAAATGAGGGGACTAATTTGGTTTTCTCTTCATTTTGCCCCCGAAATTTGAAAATTGACCCAACCGATATTTCGCTCAGTGGGGAGGGAGGGGGGGGGGGCAGTAAACACTCACAAAACAAAAACAATTATTTTTGCCCCCGACATTTGCAGAAAAAGAAATTTGTTTTACTTTTTGTTGTTGTTGTTGCCAGGGGCCATTTACATTTGTTTTGTTTTAAAAAGGTAAAATTTACGTTTTTGTACGTGTTTTGGAGCCGTTGGGCCCGTCGCGCACCCCCTACCCCCACCCTTTTTTTGTGGCGAAGTATTCTAAAGTTGCTTCGAAAACTATTATTTAAAGATA	0	NW_022145613.1:17306182-17306530	NW_022145613.1	17306182	17306530	LOC580912	0	gttttaaatgaGGGGACTAATTTggttttctcttcattttgcccccgaaatttgaaaattgacccaaccgatatttcgctcagtggggagggaggggggggggcagtaaacactcacaaaacaaaaacaattatttttgccCCCGACATTTGCagaaaaagaaatttgttttactttttgttgttgttgttgccaggggccatttacatttgttttgttttaaaaaggtaaaatttacgtttTTGTACGTGTTTTGGAGCCGTTGGGCCCGTCGCGCACCCCCTACCCCCACCCTTTTTTTGTGGCGAAGTATTCTAAAGTTGCTTCGAAAACTATTATTTAAAGATA
Scaffold1031:101936-102122	Scaffold1031	101936	102122	WHL22.12836	SPU_012488	AATGGTGAAGAGTATAGTAACATTTTCTACTTTTTGGCATGTTTCGATATTTTTAGATTTTGAAATAATTATAATTCTAAATTAATAATTTTTATAGATATTTTAAGTAAATTTTGAATGTTTTTATAAGGTAATTTATATTTTTTATTGGAAAACCTCTGTTCGAGGTTGTGACATCACTGCTCA	0	NW_022145600.1:26943910-26944096	NW_022145600.1	26943910	26944096	LOC575958	0	TGAGCAGTGATGTCACAACCTCGAACAGAGGTtttccaataaaaaatataaattaccttataaaaacattaaaaatttaCTTTAAATATCTATAGAAATTATCAATTTagaattataattatttcaaaatataaaaatatcaaaacatgCCAAAAACTAGAAAATGTTACTATACTCTTCACCATT
Scaffold1031:123358-123516	Scaffold1031	123358	123516	WHL22.12988	SPU_003974	TAGTAACTCATATATATGCATGGACTTTATCACTAAATTAACTTGTGCAGGCTCAAAACAGTCTATATAAAGACATGTACCGTAAACATTTGTATGTGTGTGTGTGTGTGTGTGTGTGTAGTTTAGAACAAATTCATAATCCAGGTAGGATTTTGACC	0	NW_022145600.1:26922530-26922688	NW_022145600.1	26922530	26922688	LOC578068	3874	GGTCAAAATCCTACCTGGATTATGAATTTGTTCTaaactacacacacacacacacacacacacatacaaatgttTACGGTACATGTCTTTATATAGACTGTTTTGAGCCTGCACAAGTTAATTTAGTGATAAAGTCCATGCATATATATGAGttacta
Scaffold1031:17867-18175	Scaffold1031	17867	18175	WHL22.12014	SPU_023517	CGTCCGCGAATATGACGCATGGATAATCCACGTATCAGTCAAGTGAACCAAGGCACTGCAACGTTTGATTGTACTTGCAATCCATGCGCTGACTTCTACAATCGCGGGGCCGTGTAGCTCTATATAACTTCTGTCCAGTTTGTGCGTACGTTCACGGTTGCTGGTAGTTAGAACGACACGTACGCACGTATGACAGAACATGTTTTCTGTCCTATTTACGTACGTGTCGGACGTACGCACGATGGACAGAAATGCTATTCGGTCTTATTTACGTACGTTTTTTTGCGGGGTTTCGTGAGCAGCAGACG	2853	NW_022145599.1:29501740-29502058	NW_022145599.1	29501740	29502058	LOC105440843	4	CGTCTGCTGCTCACGAAACCCCGCGAAAAAACGTACGTAAATAAGACCGAATAGCATTTCTGTCCATCGTGCGTACGTCCGACACGTACGTAAATAGGACAGAAAACATGTTCTGTCATACGTGCGTACGTGTCGTTCTAACTACCAGCAACCGTGAACGTACGCACAAACTGGACAGAAGTTATATAGAGCTACACGGCCCCGCGATTGTAGAAGTCAGCGCATGGATTGCAAGTACAATCAAACGTTGCAGTGCCTTGGTTCACTTGACTGATACGTGGATTATCCATGCGTCATATTCGCGGACGCCACGGTCCG
Scaffold1031:349880-350029	Scaffold1031	349880	350029	WHL22.13075	SPU_014504	AAAAAAGAGAAAAGGGAAACAAAAGAAACGGGGGAGGAAAGAGAGGAGAGAGAGGGGAGGTAAGGGTCTGAGAGAGGAGGAGTGGGAGTACAAGTTTGAAGTCGGTGAGATGTATATTGTCGGCCGACAAGTTTTTTGGTTAGTGATCG	181234	NW_022145605.1:27354076-27354414	NW_022145605.1	27354076	27354414	LOC115926785	11604	aaaaaagagaaaagggaaacaaaagaaacgggggaggaaagagaggagagagaggggaggtaagggtctgagagaggaggagtgggagtaaaagagagaggggggttgttgggtggagtcgtctcgtcgagggagcaagaaagacacgggtaaaatatattgctgtgtcgggtcagctgtgtcggtattcttgctcgatcctcgtgtactataccaatgcagaagtttgaagtcggtgagatgtatattgtcggtcggccgacaagttttttttccctacgagctgtgactttttatccgctggccttcttttagtttagttttttggTTAGTGATCg
Scaffold1032:10553-10901	Scaffold1032	10553	10901	WHL22.12415	SPU_005427	TGAAATAAAACATCTACAAGTCACAGTGGAACAACAAACAAATCAAATACAAGATCTATCATGGAAACTTGACCAACAAGAACAATACTCAAGAAGAAACTGCCTCTTATTCTTTGGTCATGATGAATCAGCGGATGAAAACACCGATGACGTCATACTTCAGCTAGCAAAGGAAAAACTTCAAGTTAATCTCACGAGGAATGACATTGAACGTAGCCATAGGACCGGATCTAAAGCTAAACACAAAAGCACCAACACACCGCGACCGATCATAGCAAAATTCAACACATACAGGAAACGACAAGAAGTGATCAGTGCCCGACGTAAATTAGCTGGTACCAGAAAATC	10462	NW_022145609.1:23996673-23997021	NW_022145609.1	23996673	23997021	LOC115928667	12750	GATTTTCTGGTACCAGCTAATTTACGTCGGGCACTGATCACTTCTTGTCGTTTCCTGTATGTGTTGAATTTTGCTATGATCGGTCGCGGTGTGTTGGTGCTTTTGTGTTTAGCTTTAGATCCGGTCCTATGGCTACGTTCAATGTCATTCCTCGTGAGATTAACTTGAAGTTTTTCCTTTGCTAGCTGAAGTATGACGTCATCGGTGTTTTCATCCGCTGATTCATCATGACCAAAGAATAAGAGGCAGTTTCTTCTTGAGTATTGTTCTTGTTGGTCAAGTTTCCATGATAGATcttgtatttgatttgtttgttgttcCACTGTGACTTGTAgatgttttatttca
Scaffold1033:83303-83468	Scaffold1033	83303	83468	WHL22.12802	SPU_012317	ATTATAATGATAATAATGATAGTAGTAATAGATAATAATAATTGAGTATTAATTAGTTCTTGTCCACAAGTGCTGAAATAACTATTTAAACAGCAATAACACTATCAATACACACAAAAAGTACAGTATAATATAATATTTCTCCTACCGATATCTCAGAACCTG	129674	NW_022145609.1:756615-756780	NW_022145609.1	756615	756780	LOC105437002	816	CAGGTTTTGAGATATCGGTAGgagaaatattatattatactgTACTTTTTGTCTGTATTGATAGTGTTATTGCTGTTTAAATAGTTATTTCAGCACTTGTGGACAAGAACTAATTAAtactcaattattattatctattactactatcattattatcattataat
Scaffold1034:74831-75181	Scaffold1034	74831	75181	.	N/A	ATCATACATGTTTTGAAAGAATGTTATATCCCGAATGGTTTGGTATCGTTTTTGTTTGGTATGTGTTCACGCTTGAAAGAACAGGAGGAATTGTTTGTGAGAGTGCAACGATCGACTTGCGCAAAAGTATCAAAGTGAGAGAACGAATTGAATGTATCCAGTGAGATGCATTGCATTTGCTTTTTGCAGAACAAAAAGTCACACACACACACACACACACACGCGCGCACAAATGATCTTTGATATTTGATATTCGATATTTAATATGTGTGGCATGATTAATTTTGTTAGGGATGTTATTTGGATCTGCAAAGACCGAATAAATACCCAAATCCCAATTGTTTTATTCA	N/A	NW_022145596.1:14755507-14755857	NW_022145596.1	14755507	14755857	LOC100893156	5043	atcatacatgttttgaaagaatGTTATATCCCGAATGGTTTGGTATCGTTTTTGtttggtatgtgttcacgcttgaaaGAACAGGAGGAATTGTTTGTGAGAGTGCAACGATCGACTTGCGCAAAAGTATCAAAGTGAGAGAACGAATTGAATGTATCCAGTGAGATGCATTGCATTTGCTTTTTGCAGAACaaaaagtcacacacacacacacacacacacgcgcgcacaaatgatctttgatatttgatattcgatatttaatatgtgtggcatgattaattttgttagggatgttatttggatctgcaaagaccgaataaatacccaaatcccaattgttttattca
Scaffold1034:8552-8767	Scaffold1034	8552	8767	.	N/A	CGACTTGTTATTGGGCCATCTCGGGCGCCAAATCATAGGGTACATAATCCTGTGTCGTCTGATGTAACTCATAATTTGATTGGTTGTCGAGAAATTAGGGCCAATTTCAATCCAATAAAAAGAAGCTTTCAGAAATGTACGCATCGACCTCCGTAATTTATGCATTGTGCGTAAGCGAGGTTTTTACACAGCGGACAATGAGGCTTAATTACACA	N/A	NW_022145606.1:31420846-31421595	NW_022145606.1	31420846	31421595	LOC105438054	1261	TGTGTAAGCCTCATTGTCCGCTGTGTAAAAACTTCGCTTACGCACAATGCATAAATTACGGAGGTCGATGCGTAAATTTCAGAAAGCTTCTTTTTATTGGATTGAAATTGGCCCTTATTTCTCGACAAACAATCAAATTATGTGTTACATCAGACGGTAGGGGATTACATATCCTCtgttcaggcgcgtacgcaggattttttcaaggggggggggggggggggggttttaacatttataaatcggtccgaaaatttcgcaacgactcagccagccgctgaataagcgggggggggggggggggggggggggggtaagaggacacattttttttgttttggtcccaaaaaaatcgcaacgactcagccgaccgctgaataggggggggggggggggggg…
Scaffold1035:250359-250432	Scaffold1035	250359	250432	WHL22.25641	SPU_017547	TGAAAGTTATTGGACCGATAAACAGTGCTCTCTGAATATACTGGTGCCATCAACTGCCACGTGGTAATAATTT	963	NW_022145598.1:16879399-16879584	NW_022145598.1	16879399	16879584	LOC587169	0	CACACTCATACCGGCAACAATTGCTCTACTGGCTGTGACAATACTGCTGAAACCTAGAGTCAATATTTGGTGGCAATTGAAAGTTATTGGACCGATAAACAGTGCTCTCTGAATATACTGGTGCCATCAACTGCCACGTGGTAATAATTTGAGGCATAGTGTTCTGAAGGTACATGCATGTTCAA
Scaffold1035:270126-270462	Scaffold1035	270126	270462	WHL22.25838	SPU_011572	AATCTTCTTTTGGACAAGGAAGTTACTCTCTTATGCTTCTTTTTATGAAAACTTATTATGTTCGGCCTTTACGACAAAAGAGAACATATGCAAAGAAGTGGGGCTGGTAAAATTACCTTGCTAGTTGCTATAATAAGAATTTGTTGTAAAGGCATTCCACTGTACATGTATATGGTCAGAAAAGTCAAAGTTTTGTCAAAGATTGAAAATGAGGGGTGTCCCTCTTGATAAGATACACTTGTGATCAAGTTTGCTGAGTTACAATAAGCTGTTGCTGTCTGGGAAGTGCTGTTGGTGATGTTTCTGAGGTAATACAGGGTGTTGAAATGAGGAAGG	0	N/A	N/A	N/A	N/A	N/A	N/A	N/A
Scaffold1036:148574-148600	Scaffold1036	148574	148600	WHL22.12949	SPU_027979	CGTGGCATTAATGTCCTCTGGCAAGA	3633	NW_022145600.1:31501323-31501349	NW_022145600.1	31501323	31501349	LOC582888	0	CGTGGCATTAATGTCctctggcaaga
Scaffold1036:153028-153349	Scaffold1036	153028	153349	WHL22.12979	SPU_012999	TACATGAAGGAAAATAATTTACTCGATCGCAATTAACTCAAGGGCAATTTCAATACCCATGTTCAGATTACGTAATACGTCTTTGCCAAGTTCTCAAAGTTCAACAGGTGACGCACAAGGATTTTGAAATGGTGTTATAGGTTGAAGTAGTCACGGGCACGCTATCGGTTTAGCAGTTCATCTTACATGTCACCTTGATTGACATCGAGAAACTAAGACTAAGTGACGTTGTCAAAAGGATATTTGATCTATGTAAATACCATCGAATGATTTTTACTAGTCAAATACATGTAGAAAGAGAGGTTCCGTGAATTGATGTCA	0	NW_022145600.1:31508035-31508580	NW_022145600.1	31508035	31508580	LOC762403	0	TAcatgaaggaaaataatttaCTCGATCGCAAttaactcaagggcaatttcaatacccatgttcagattacgtaatacgtcttTGCCAAGTTCTCAAAGTTCAACAGGTGACGCACAAGGATTTTGAAATGGTGTTATAGGTTGAAGTAGTCAcggaggctgttcacaccggcagagatagcgcgcgccagaccgcgctatctccgcggtttggaaggtacaacgtcgtttcggtccgcccaacagcgagccacggcgagccaacactggagcacctcttggggtggtccacgagagatagcgcgggctagcgcgcgctagaaaaaagggggtgctacgatagaccgcgctatctcattgcggtgtgaacagcctcacgGACACGCTATCGGTTTAGCA…
Scaffold1036:88925-89171	Scaffold1036	88925	89171	WHL22.12952	SPU_012898	GAATTGTAACATTCAGTTAGCATTCAGGGGCACGCTACAAGAGTCTCGCACCCCTGTCCCCTGGGCAACGTGTCTGACACGGCCGGTTGAAGCAACTGCTCCCAAGATCAAGATGGAAGGACTTGATTTAGGAAGTTTAAATTAATCTTGATCTAAGGTGACACAAACAAACAAGCATTAGACATTGAGAGCCCCCTCCCCCAATATCCATGAAAAGATATCAAATGAGGCGCCAGTGAATAAGGG	0	NW_022145600.1:31449684-31449930	NW_022145600.1	31449684	31449930	LOC579815	0	GAATTGTAACATTCAGTTAGCATTcaggggcacgctacaagagtctcGCACCCCTGTCCCctgggcaacgtgtctgacacggccggttgaaGCAACTGCTCCCAAGATCAAGATGGAAGGACTTGATTTAGGAAGTTtaaattaatcttgatctaaggtgacacaaacaaacaagcattAGACATTGagagccccctcccccaatatccatgaaaagatatcaaatgaGGCGCCAGTGAATAAGGG
Scaffold1036:90740-91095	Scaffold1036	90740	91095	WHL22.12952	SPU_012898	GTGAAGCCTCATGACCAGGGCCTGATCAAAGGGGAGCAAGGATATACAAATTAATATTCATTACAACAATCTAAGTAGCTTCCACGCTGGCTGACTAAACCGCTGTACATCAAAACCTCTTGGATCCCTCCAAGGATAATGGAATTAAAAACGTTGATGTGTCAACTATGTAGGATGAATTAGTCATTGTCATGCGTGAGAAATTGATGGGCAACTCCGTGTTCAAACGTCTAGCTGAATGACAATGCAGCGATAGTGATGTATGCGAGATAGAGAGAGTTGGATAATTGTGGTGAATGTATAATTTATTAACATTTGGAATAAGAGCAGGCTTTCAAGCTTAGTTCCCAGGCCA	0	NW_022145600.1:31451493-31451848	NW_022145600.1	31451493	31451848	LOC579815	0	GTGAAGCCTCATGACCAGGGCCTGATCAAAGGGGAGCAAggatatacaaattaatattcattacaACGATCTAAGTAGCTTCCACGCTGGCTGACTAAACCGCTGTACATCAAAACCTGTTGGATCCCTACAAGGATAATGGAATTAAAAACGTTGATGTGTCAACTACGTAGGATGAATTAGTCATTGTCATGCGTGAGAAATTGATGGGCAACTCCGTGTTCAAACGTCTAGCTGAATGACAATGCAGCGATAGTGATGTAtgcgagatagagagagttgGATAATTGTGGTGAATGtataatttattaacatttgGAATAAGAGCAGGCTTTCAATCTTAGTTCCCAGGCCA
Scaffold1037:107691-108169	Scaffold1037	107691	108169	WHL22.13233	SPU_000940	CCCATCCATCCATCCGTCCGTCTGTCCACCCATCCATCTATCCATCCACTCATCCACCCATCCATCCATCNNNNNNNNNNNNNNNNNNNNNNNNNNNNNNNNNNNNNNNNNNNNNNNNNNGTATTGCATCGTAGTTCGCCGACACCAGATTTGATTGAATAAATAATTATTGTGTGCGAAACAGGTCTTACTAAGGGATTTGTTTTACAATGCATTTTCAGATGATTTGTAAAATAACACGAGCATTGTGCCATCCCAACCCAATCGAGGTTGGTAGGATGGGGGGGGGGGGGGGGAGCTAACCACTAGGCAAACNNNNNNNNNNNNNNNNNNNNNNNNNNNNNNNNNNNNNNNNNNNNNNNNNNACTTTACTCTATTACTTCTTCAGTAATGTGAGTC…	0	NW_022145604.1:22957231-22957869	NW_022145604.1	22957231	22957869	LOC586392	0	CTGATGAAACAGTGGGTGGATGGCGAGAAGGATAGATTGGTAGATAGATTGGTGGATAGATAGACTCACCTTACTGATAGACTCACATTACTGATGAAGTAATGGAGTAAAGTATTGATAGACTAATGAACCAATGGATGGCtaaatggatggatggatggatggatggatgggtgggtgggtgggtggatggatggatggatggatggatggatggatggatggatgggtgggcgGGTGGgttggtgggtgggtgggtagatggatggatggatggatggatgggtgggtgggttggtgggtgggtgtgtggatggatggatggatggatagatgtatggatggatggatggatggatggatggatggatggatggatgggtgggtgggtgggtgggt…
Scaffold1037:146148-146265	Scaffold1037	146148	146265	WHL22.13625	SPU_009145	CGCCGCGACAGGACTATAACCGCGAACCATGCGATCCACGATTCGGTGAGATATCCTCTAGACCGTGACATGTGTACCTATGTATAAAGCTCCATCCCTTAGCACATGTTACTACTA	511	NW_022145604.1:22918569-22918686	NW_022145604.1	22918569	22918686	LOC105441516	0	TAGTAGTAACATGTGCTAAGGGATGGAGCTTTATACATAGGTACACATGTCACGGTCTAGAGGATATCTCACCGAATCGTGGATCGCATGGTTCGCGGTTATAGTCCTGTCGCGGCG
Scaffold1037:30356-30577	Scaffold1037	30356	30577	WHL22.13156	SPU_007294	CGTCCAAGAGATAATACTGGAAAATATTCAAATGTTCTGCGGATATCTCAAGATTGTCGGTGCCATGGTTGAGGGCGTGGTCAATCCAAAACGCTGCTCGTTCAGCCGGCTTCATCGGCCGATTCCGTAAATTAGCCGACATCCGTTTGGCTGTTTGCATGTAGGTGCTGTTGGATGTTACTTCATACAGAGCTTCATAAATCATATCCGATGTTATGTTA	0	NW_022145604.1:23021582-23021803	NW_022145604.1	23021582	23021803	LOC105443756	0	TAACATAACATCGGATATGATTTATGAAGCTCTGTATGAAGTAACATCCAACAGCACCTACATGCAAACAGCCAAACGGATGTCGGCTAATTTACGGAATCGGCCGATGAAGCCGGCTGAACGAGCAGCGTTTTGGATTGACCACGCCCTCAACCATGGCACCGACAATCTTGAGATATCCGCAGAACATTTGAATATTTTCCAGTATTATCTCTTGGACG
Scaffold1037:34479-34809	Scaffold1037	34479	34809	WHL22.13156	SPU_007294	CGCCCCCGTCAGGTTGCTCACGGGGGCGATTGCAAAATTAAAAATCGCCCCGGTGGAATTATAAAATAAAGATTATCTTTTCTGTTATAACTTTAACACAATATTGAGTTTCAATTTTCAAACCTTAAACCAATGAAATGGAACTAAGATTAGCGTGCAAGATTTCTCGTTTTATGAGTAGGCCTATTATTACCGATTCAGCTCGCAGTGCAGTGCCGCCGTCAGCAGTGGTTATAGGCCTACTGCGCCTTTAGTAGCGGTGCGTGTGCACGCTGCCGCGCCATGTCTGCTGGAGCTGGAGGCGATCGCGCAAGGGCAGAAACATGGTCA	2730	NW_022145615.1:8265077-8265387	NW_022145615.1	8265077	8265387	LOC115920681	13180	tgaccatgtttctgcccttgcgcgatcgcctccagctccagcagacatagcgcggcagcgtgcacacgtaccgctactaagggcgcagtaggcctataaccactgctgacggcggcactgcactgtgagctgaatcggtaataatcataaaacaagaaatcttgcacgctaatctaagttccatttcatttgaaaattgaaactcaatattgtgttaaagttataacagaaaagaaaatctttattttataattccacgggggcgatttttaattttgcaatcgcccccgtgagcaacctgacgggggcg
Scaffold1037:42674-43040	Scaffold1037	42674	43040	WHL22.13156	SPU_007294	CGCCTGAAGCTGTTATTATGTAGAGAATATCACTGTCTGCCTATCGCACCAATTTAACATAGTTTCTGAAACCATGCACATAAAGAAGGGGGTCATGATCGCCCGACCGTATCTCACTACGTTGTGCTTGTCTGGTTAATCTTCAGTTCTATTATGAGGGACTTTTAGATTTTCGTGGACTGATACGTGTGATGTACGTCCATTCAAGGCAGTGCATTAAAAGGACGTCGACCGTAGCAATCCACATTGCATTGTCTTCGTGCTAATCTAGAAGTCCCTATATTGTTGTCGACTAAAAAGCGGAGGCCACGCAAAGTGCTTTAGTTTTTTCCATTGGTTGCCGCTATATACTTCACAAACTAATCA	10925	N/A	N/A	N/A	N/A	N/A	N/A	N/A
Scaffold1038:116922-117265	Scaffold1038	116922	117265	WHL22.13574	SPU_000222	TTGCCTTCCAGTCCGCACGGGTAACGATCGTTGGACACGCTTTAGCTGGAAAATAAAAGGGACAGGTTCAGGATACCGCCCCAGAAATTAAAAATGCCTTTTTTTAAATGGAACGAAACAGGTCTTGTCCCTTGAAAGAATCAAGGATATAATAAACTGTTGGGGTATAAGTCCTTTCAAATGATAAAATGGGTCGCGTTTACTTGTACTAGACCCGTGGACTACTAGACAACATAGCTTCCAGTGGATTACAAAAATGAAAAATAAAATGAAAGTCTGACATTCCCTTTCTAGCACGTCTTTCTAGGACAACTACCCCCTAGGGCAACCATCCTCTAGGACG	0	NW_022145613.1:35217881-35218224	NW_022145613.1	35217881	35218224	LOC591777	0	TTGCCTTCCAGTCCGCACGGGTAACGATCGTTGGACACGCTTTAGCTGGAAAATAAAAGGGACAGGTTCAGGATACCGCCCCAGAAATTAAAaatgcctttttttaaatggaacGAAACAGGTCTTGTCCCTTGAAAGAATCAAGGATATAATAAACTGTTGGGGTATAAGTCCTTTCAAATGATAAAATGGGTCGCGTTTACTTGTACTAGACCCGTGGACTACTAGACAACATAGCTTCCAGTggattacaaaaatgaaaaataaaatgaaagtctGACATTCCCTTTCTAGCACGTctttctaggacaactaccccctagggcaaccatcctctaggacg
Scaffold1038:127552-127974	Scaffold1038	127552	127974	WHL22.13574	SPU_000222	TGGTAACGGCGGTTCTGAGATACCGAGAATCGCTACAGAACATTTTTCTCTTCCAACTTTATTTCTATATCATGTAGCCTGCCTTCATTTTGCTCGATCAGTTGGTTGAGTTTAGTGAAGGTGTGTCTGCCATTTCACGAGCGATGGTTTTCGCAAGATCACGAATTTCATTTAAAAATGATTCGTTTTTGAAGAGTTCTATAACTAGTTCGGATACAGATACTTTTTGATAAGCCGACTCCTTGCGAGTTGTCGGCAGTGTAGTCGNATGGNATCCCNGGCCCTGACCCCCGAGAATCGCTACAGAACAGATGTTTTATTGTAGTTACAAAATAAAAAAACACGTCGGGGGTGTGGCGAGTGAATGCAGTGAAACGAATGTAAACAGACTTACTAGTA…	5385	NW_022145598.1:15583631-15583802	NW_022145598.1	15583631	15583802	LOC105442365	10586	TGATAACGGCGGTTCTGAGATACCGAGAATCGCTACAGAACAGATGTTTTATtgttaaacatgtacaatgagTTACGTAATAACCGAGGCGTGTCGTGGGTGTGGCAAGTGAAGGCAGTGAAACGAATGTAAATCAGActtactactagtagtagtagacacGAAAACGGT
Scaffold1038:15296-15441	Scaffold1038	15296	15441	WHL22.13601	SPU_012223	CCCAATATAAATTCTCCGATTGTTCTAGATTCAATTCGAATAAATAATTTTTTCTGACATTTCCCTGTGAATGACAGTGAACCTTGTCTGACGGTAACCTGTTCATGCTCTCTTAATCATCTATAGGAAAGGGTTCAATTGCCTT	0	NW_022145613.1:35120198-35120343	NW_022145613.1	35120198	35120343	LOC105445896	0	CCCAATATAAATTCTCCGATTGTTCTAGATTCAATTCGAATAAATAATTTTTGCTGACATTTCCCTGTGAATGACAGTGAACCTTGTCTGACGGTAACCTGTTCATGCTCTCTTAATCATCTATAGGAAAGGGTTCAATTGCctt
Scaffold1038:221533-222071	Scaffold1038	221533	222071	WHL22.13708	N/A	CCCTCTCTCTTTCTCTCCTTACCCTTCTCTTCTTCCCTTCTCTCCACCTTCCTTGTTTTTTCTTTCTTTCTTTCCCGCACGTTTATCTCATCCATCTGACAGAAATGCCCGCCAATCTTCCTAATTAACTCGAGATCATGGTATAACCTCTATCCAATCCCCTCATCAATTGAAAGATAATTTCTTTCTTTCCTTCTTTTCTTATATGCCTTGAACCGTATGCTGGTACCACGCATATTAACCGAATACCGACACACTACCTCGCCACCATCTATAAAACTTTATATCCGCTATTCAGTTTCTTCCCATCCAAGGCCTAGCGTTGTCTGTAATATTAAGCGGGTATATATTATGATTAGGCAGTATTTGCACTTATATTCTGTGAACGCACGTAAATTT…	0	NW_022145613.1:35320531-35321069	NW_022145613.1	35320531	35321069	LOC756604	0	ccctctctctttctctccttacccttctcttcttcccttctctccaccttccttgttttttctttctttctttcccgcACGTTTATCTCATCCATCTGACAGAAATGCCCGCCAATCTTCCTAATTAACTCGAGATCATGGTATAACCTCTATCCAATCCCCTCATCAATTGAAagataatttctttctttccttcttttcttataTGCCTTGAACCGTATGCTGGTACCACGCATATTAACCGAATACCGACACACTACCTCGCCACCATCTATAAAACTTTATATCCGCTATTCAGTTTCTTCCCATCCAAGGCCTAGCGTTGTCTGTAATATTAAGCGGGTATATATTATGATTAGGCAGTATTTGCACTTATATTCTGTGAACGCACGTAAATTT…
Scaffold1038:271034-271196	Scaffold1038	271034	271196	WHL22.13711	SPU_002379	TGTGTGTAAGCTGATGAGAGAGAAGAATGTAGATTAGTCACCCACAAGTTTAATGAAGGAAACATGGATTTCATTTCAATAAGACTAGTTTCCTAATCATTCTGGTCAATTCTAGTGATATTTAGTAAACGAAAAGAGAAACCGCCAAACGAGAGAGTGCAG	31725	NW_022145613.1:35367254-35367417	NW_022145613.1	35367254	35367417	LOC763262	0	tgtgtgtaagcTGATGAGAGAGAAGACTGTAGATTAGTCACCCACAAGTTTAATGAAGGAAACATGGATTTCATTTCAATAAGACCTAGTTTTCTAATCATTCTGGTCAATTCTAGTGATATTTAGTAAACGAAAAGAGAAACCGCCAAACGAGAGAGTGCAG
Scaffold1038:279633-279665	Scaffold1038	279633	279665	WHL22.13711	SPU_002379	GAGATGGAAGACGAGACTCTCTGCTAAGATAA	40324	NW_022145613.1:35373426-35373458	NW_022145613.1	35373426	35373458	LOC763262	0	GAGATGGAAGACGAGACTCTCTGCTAAGATCA
Scaffold1038:70043-70349	Scaffold1038	70043	70349	WHL22.13601	SPU_012223	AACTTGTCACTCGCAGAGGAACATTTTAGAAGTATGTGTCGGAACGCTGTAATTTTTTTATTTTTATTTGAGAACAAAGATCTGTCGTTCATAATTATAGGCAACAAATAATGCCAACTTTTCTTTGCATTTGAAGGATTATAGGTGATTTTTGTTTCCGCAATACTTCTTGGTGTCCTGGTTACCCCATTGAGGCATAGCAAGTAATAAACCACCAGCCAATCACGGCAATTACCCGCATGTCAGTCTGCCAGACGATTCAGTCCCACACGTTCATTATCAGCGTGGGTTACGCTGTTAAAATCA	32271	NW_022145613.1:35171233-35171510	NW_022145613.1	35171233	35171510	LOC105445896	5895	ACTTGTCGCTCGCAGAGGAACATTTTAGAAGTATGTGTCGAAACgctgtaatttttttatttttatttgagaaCAAAGATCTGTCGTTCATAATTATAGGCAACAAATAATGCCAACTTTTCTTTGCATTTGAAGGATTATAGGTGATTTTTGTTTCCGCAATACTTCTTGGTGTCCTGGTTACCCCATTGAGGCACATCAAGTAATAAACCACCAGCCAATCACGGCAATTACCCGCATGTCAGTCTGCCAGACGATTCAGTCCCACACGTTCATT
Scaffold1038:75019-75402	Scaffold1038	75019	75402	WHL22.13568	SPU_000222	ACTTTGTTTCGGACCGTGGCGCACCGTGCGTGGGCCCAGTCATGGGGGGTGGGNNNNNNNNNNNNNNNNNNNNNNNNNNNNNNNNNNNNNNNNNNNNNNNNNNTATACCCCTCCCCTCTCACTCCCCCAACTTTCTCTTTACTTTTCAGCCGTTCGATGTGGGGCGGGGGGGGGGGGGGCTCGGCACATGCCCTTCTTTAGCTACGCCATTGGCGTTTGGGGTGGAATAACAATTTATCCTGTAACTGATAACCTTTTAGCATTTCTTTCCGCGATATGGTTAGGCCTAGATCATGGGACACTTTTACATGGATGTGAAAGGGTTCAATAAAGCAATGTCAATGAGTGTCAATAACTTTATGTCATCCGTTGTGGCACCACCC	28253	NW_022145613.1:35173982-35174503	NW_022145613.1	35173982	35174503	LOC105445896	8644	ACTTTGTTTCGGACCGTGGCGCACCGTGCGTGGGCCCAGtcatggggggtggggggggggggcaccggtCTTACTCAATGCGAAACAATGCAACCGAATGGGGGAAGGGTATGGGGGTTACTATAATATCATCTcctttattgttttaaaaattttgtattgatatctttatttatacacggttaAAAAAGCCCAAACAGTTACAAGACTGATTTCCATTGGGGCCGTGTTTTCCTTTCCATATACCCCTCCCCTCTCACTCCCCCATCTTTCTCTTTACTTTTCAGCCGTTCGatgtggggcggggggggggggttggcacATGCCCTTCTTTAGCTACGCCATTGGCTTTTGGGGTGGAATAACAATTTATCCTGTAACTGATAACCTTTTAGCATT…
Scaffold1038:77737-78297	Scaffold1038	77737	78297	WHL22.13568	SPU_000222	AATTGTATGAGCAACCTTCAAAGATGAAAAACAGAAGAAAATAGGAGATGAAGCAAAAAGGATTCATTGCAAAATTCGATTCCGTTTGTATTCTTCTCATTCCAAATCGTTTACGACCGGCCTTCGCCAGATTTCTCAGATTTTCATGATATCAGGCCTAGTAGATAATAAGCTTAAAGAAAAGAAGCTTTGTTCCATGATTTCATATGAGACGATTAGCATGTAATCGACCTTTAATTGGTTCTGCTTGGGAGTTTTAAGAACGCTTAAAACATCCATTGTTAGAGGGTTTACATTTTCAATACACGCCTTAATGCCTTGTAAAACATCAATGCCCCTCAAAACATAGATCTGTGACTATTCCACTAATGATAAAAAACATAGAAAACCGATAAAAGT…	25358	NW_022145613.1:35176818-35177378	NW_022145613.1	35176818	35177378	LOC105445896	11480	AATTGTATGAGCAACCTTCAAAGatgaaaaacagaagaaaatagGAGATGAAGCAAAAAGGATTCATTGCAAAATTCGATTCCGTTTGTATTCTTCTCATTCCAAATCGTTTACGACCGGCCTTCGCCAGATTTCTCAGATTTTCATGATATCAGGCCTAGTAGATAATAAGCTTAAAGAAAAGAAGCTTTGTTCCATGATTTCATATGAGACGATTAGCATGTAATCGACCTTTAATTGGTTCTGCTTGGGAGTTTTAAGAACGCTTAAAACATCCATTGTTAGAGGgtttacattttcaatacaCGCCTTAATGCCTTGTAAAACATCAATGCCCCTCAAAACATAGATCTGTGACTATTCCACTAATgataaaaaacatagaaaaccGATAAAAGT…
Scaffold1038:80140-80519	Scaffold1038	80140	80519	WHL22.13568	SPU_000222	CTATCCTTTATCCCACAAAAGAGAGAGAAGACTAGGGATAACAAGTCGATGGGGCTTTTCAAATCTGTAGTACTTTTGTTCAATAAACCCCTACCCGGCCTTTTTGAAGCTGAAGTTTTTTTGTTGGTACATGTATTAATCGCGCTCCCACAATATTTTCGGGGTTATACGATTAAAAAGCCATGGGGGATTACTTTCGTTTGCAAACAAGCGGCTTCTGGTCTTTCATTAGGTGTGCAGTCATTCAATAATAATAAGGAATGGCAATCCGGGATGGCAATCAATAGTCACAAGAGATCGTTGTTAGCGTTGGTATCTTATAAGCTGATTATAGTAAGGGATACCATGCATTTAATAATCACTTGATAATTACTTAGGG	23136	NW_022145613.1:35180314-35180689	NW_022145613.1	35180314	35180689	LOC100892968	10081	CTATCCGTTATCccacaaaagagagagaagactAGGGATAACAAGTCGATGGGGCTTTTCAAATCTGTAGTACTTTTGTTCAATAAACCCCTACCCCGCCTTTTTGAAgctgaagtttttttttgttggtacatGTATTAATCGCGCTCCCGATTATTCTCGGGGTTATAGGATTAAAAAGCCATGGGGGATTACTTATCATTTGTTTGCAAACAAGAGTCTTCTGGTCTTTCTTTAGGTGTGCagtcattcaataataataaggaATGGCAATCCGGGATGGCAATCAATAGTCACCAGAGATCGTTGTATCTTATAAGCTGATTATAGTAAGGGATACCATGCATTTGATAATCACTTGATAATTACTTAGGG
Scaffold1038:82743-82874	Scaffold1038	82743	82874	WHL22.13568	SPU_000222	CAAGATATATTGAAGTCGTATTATCGAACACTTGACCGGGGTTAAATAGTTTAGTTTTCTAGAAGCTCCCTATCACATCTCGAGCTCGGTTGAGAGAAATTTAACACAGTAATGGTGTGCATAAGATGATG	20781	NW_022145613.1:35181365-35181496	NW_022145613.1	35181365	35181496	LOC100892968	9274	CAAGATATATTGAAGTCGTATTATCGAACACTTGACCGGGGTTAAATAGTTTAGTTTTCTAGAAGCTCCCTATCACATCTCGAGCTCGGTTGAGAGAAATTTAACACAGTAATGGTGTGCATAAgatgatg
Scaffold1039:146552-146719	Scaffold1039	146552	146719	WHL22.13682	N/A	AATCAAATGATTGGTTATTCGCGGTCACGTGTGATTCATTTGCTGAGCCGTTTCCATAGAGATATACTAACACAGTATATATCTCTATGGCCGTTTCATGAAAAAGCGTGCAATATTTTCATTATGTCCCGGCATGCTTTGCGATGAAACAACCGTGAAGGCACGTA	141028	NW_022145614.1:6925569-6925570	NW_022145614.1	6925569	6925570	LOC583384	0	a
Scaffold1039:29405-29626	Scaffold1039	29405	29626	WHL22.13682	N/A	GGTGGTTTCTCTGCGTTACCAGTACTCTTTCTTTTGTGGCCATACACCTCCTTCTGAAGAGCAACCCTTTCATCTATCAAGGGCGCTCGTTCGTGCTTGAACTTTGTCCAAAGCGATTCTTTTCATGTATCATAACCGCTCTCATTACATGCACGGTCCTTAAGAAGTGGATACTTCCGCACAAGGGCTCTTGAAACCTCAGTATACTGCATTGAAGTGGG	23881	NW_022145596.1:22951678-22951849	NW_022145596.1	22951678	22951849	LOC115922293	16094	CCCACTTCTGAAGGACCGTGCATGTAATGAGAGCGGTTATGATACATGAAAAGAATCGCTTTGGACAAAGTTCATGCACGAACGAGCGCCCTTGGTAGATGAAAGGGTTGCTTTTCAGAAGGAGGTGTATGGCCACAAAAGAAAGAGTACTGGTAACGCAGAGAAACCACC
Scaffold1039:5519-5864	Scaffold1039	5519	5864	WHL22.13682	N/A	TGGGCGCAGCCATCTTTAATTTATTCGAGATTAGTCAAATGAAGAAAGCATTTTTGACAATTAATAAAATGTTAAGTTGCTTACCGGTCCAAATTAAATATATGTTTTATTTTGGAATATATTTTATTACTTCTGTACCTTATAAGTAATATAAATAAAATAAAATGATACGAGGAAGTCTACATACATTTTGTGTTTGTTGACTCTTGTGTTGTTGTGCATGTGACATGTGCGCTGCGGTGGGATATTTTGATCACCCAGCTATAGCACTGCACTGAGCTGAGTGGGGGGAGGTGCGCTCTAGTCGGCCAGCCCAGCAGCGCCCCGTGTACGAGGGCCAGTAGT	0	NW_022145596.1:20721661-20722006	NW_022145596.1	20721661	20722006	LOC100889910	0	ACTACTGGCCCTCGTACACGGGGCGCTGCTGGGCTGGCCGACTAGAGCGCACCTCCCCCCACTCAGCTCAGTGCAGTGCTATAGCTGGGTGATCAAAATATCCCACCGCAGCGCACATGTCACATGCACAACAACACAAGagtcaacaaacacaaaatgtaTGTAGACTTCCTcgtatcattttattttatttatattacttATAAGGTACAgaagtaataaaatatattccaaaataaaacatatatttaattTGGACCGGTAAGCAACTTAACATTTTATTAATTGTCAAAAATGCTTTCTTCATTTGACTAATCTCGAATAAATTAAAGATGGCTGCGCCCA
Scaffold1039:8567-8713	Scaffold1039	8567	8713	WHL22.13682	N/A	CAAGTCCCATTGTTTGGTGGTCCTTGGAACTTGAACTAATCCCCCTTTCGATCAGTGACAGCTACTTGTACAAAACAGTGCACTTTTGTATAGTTGTATGAAAGGCCACAGTTGCCCAATTATGTAGACAATTCTTGTTAATTTTT	3043	NW_022145596.1:22983375-22983803	NW_022145596.1	22983375	22983803	LOC115922293	0	CAAACTCCATGTATAAAGCAGTCCTTTCTTTAAACTTCAAGTTTCCACCAAATGCTGCCTTTTTgctttgcattaaaaattaaCAAGAATTGTCTACATAATTGGGCAACTGTGGCCTTTCATACAACTATACAAAAGTGCACTGTTTTGTACAAGTAGCTGTCACTGATCGAAAGGGGGATTAGTTCAAGTTCCAAGGACCACCAAACAATGGGACTTGAGAGGATCTCTTAGAAACTGTACTGCACAGGTGCTGGATGTACTTGGAGGTCTAGatcatataaaaagaaaagttaaaGGATAATGTGGAGTCCTTTGTTGTGATAAACAAAGGATAACACAATTGTCTATTTTCGAATCTATACAGAAAAGTATCTCTACACAGTACTTCACAGGCAT…
Scaffold104:112118-112493	Scaffold104	112118	112493	WHL22.14504	SPU_017478	CCCCGACGTAACAGAAATCACCCGATGAGCAGCTGATGGCGATGATATCCTTCTGTTGGAATAGTTTCTGCTGGAAACTTTTACCGCACTGTTTGCACTTCCCCTCCTGCCTACTCCGATGGACCCAATGGTGCCGAACCACCTGGTTCTCACGATAGTTCCTGATCCCTGCATCCCGAAACGTTGGCTTGCACTTAAAGTTTATCTGCGTGAGGTTGGAAGGAGGTGTTACAGGGAGTTGTTGGTTTGGTTTTACAAGTCAATCTTCTTCTGAATATACGTAGTATTTATGTTTATTTATTCTCCACTTTAGTATAGCTAAATTTTTCTTTTGTTCCTCTCTTGTTATCTCTTTACTTGGCTTCTATATTCTAG	0	NW_022145602.1:26516012-26516355	NW_022145602.1	26516012	26516355	LOC591406	0	CTGATGGCGATGATATCCTTCTGTTGGAATAGTTTCTGCTGGAAACTTTTACCGCACTGTTTGCACTTCCCCTCCTGCCTACTCCGATGGACCCAATGGTGCCGAACCACCTGGTTCTCACGATAGTTCCTGATCCCTGCATCCCGAAACGTTGGCTTGCACTTAAAGTTTATCTGCGTGAGGTTGGAAGGAGGTGTTACAGGGAGTTGTTGGTTTGGTTTTACAAGTCAATCTTCTTCTGAATATACGTagtatttatgtttatttattctccACTTTAGTATAGctaaatttttcttttgttcctcTCTTGTTATCTCTTTACTTGGCTTCTATATTCTAG
Scaffold104:147974-148097	Scaffold104	147974	148097	WHL22.14594	SPU_017478	CCTCAGCGGCAATGCCAAATTAACTACTTCCTTGATTGTTCAAAGCAAACTTGGAAACGAACACTTCCGTTACTCTACCTGTGTATCATACATGTACACCTCACGTACATGTAAGGTAGGGTA	0	NW_022145602.1:26547752-26547875	NW_022145602.1	26547752	26547875	LOC591406	20808	CCTCAGCGGCAATGCCAAATTAACTACTTCCTTGATTGTTCAAAGCAAACTTGGAAACGAACACTTCCGTTACTCTAACTctgcatcatacatgtacacctcaCGTACATGTAAGGTAGGGTA
Scaffold104:209715-210032	Scaffold104	209715	210032	WHL22.14594	SPU_017478	CATCTGGATAACATCCCACCTTAACTTAATAAACCTTGTGCTGCAGCCAAATTATCAGTATGAATGCAAAATATCTATCAGATGAAACCATAGACATCATGGTACATGTACATACATGTATATCCTCTCCAGCTACATAATTTACAGCCAGCCTCCCCGTCTTTCTCATCCCAAATATTCCCTTCTTATTTAACTACACATCTCCTTTCAGTACAAAATCAAATACAGCATTCCCTTACCCCTTCCTCCTAAGAGTATGCCCGATCTCCCCACCCCCCCCCCCCCTCCAAAAAAAAATATTTTGTTTATATTTCTAT	49267	NW_022145602.1:26604010-26604327	NW_022145602.1	26604010	26604327	LOC591406	77066	CATCTGGATAACATCCCACCTTAACTTAATAAACCTTGTGCTGCAGCCAAATTATCAGTATGAATGCAAAATATCTATCAGATGAAACCATAGAcatcatggtacatgtacatacatgtatatcctctCCAGCTACATAATTTACAGCCAGCCTCCCCGTCTTTCTCATCCCAAATATTCCCTTCTTATTTAACTACACATCTCCTTTCAGTACAAAATCAAATACAGCATTCCCTTACCCCTTCCTCCTAAGAGTATGCCCgatctccccaccccccccccccctccaaaaaaaaatattttgtttatatttctat
Scaffold104:309276-309294	Scaffold104	309276	309294	WHL22.16190	SPU_011092	TACACTTGGTGAAAGAAA	26581	N/A	N/A	N/A	N/A	N/A	N/A	N/A
Scaffold104:341651-341844	Scaffold104	341651	341844	WHL22.16192	SPU_011093	GGTAACAACGTTGCCAATCGGTCAGAAAATTCTACATTTAGAAAATAACAATCACATCATTTTCATACTAAAAAATAAAACTTAAAATGCAAGTTATTATTTTTAGAATTAATGTTTGCTACATATAACTCATTATTATTTTTGAATTCATAAATTAAACTTTTATTTCCTTTTTGGACGAGGATAAAAAGCA	0	NW_022145597.1:6178690-6178883	NW_022145597.1	6178690	6178883	LOC753561	0	TGCTTTTTATCCTCGtacaaaaaggaaataaaagtttaatttatgaattcaaaaataataataagttatATGTAGCaaacattaatttaaaaaataataacttgcattttaagttgttttttttagtATGAAAATGATGTGATTGTTACTTTCTAAATGTAGAATTTTCTGACCGATTGGCAACGTTGTTACC
Scaffold104:360389-360465	Scaffold104	360389	360465	WHL22.16289	SPU_011093	CCGTAACAACCCAAATTTATGTCATATTTATTGAAAGACATTTCACATGTTCCTTCTCTTTCCCCTCTCCTGCAGG	0	NW_022145597.1:6160181-6160257	NW_022145597.1	6160181	6160257	LOC753561	0	CCTGcaggagaggggaaagagaaggaaCATGTGAAATGTCTTTCaataaatatgacataaatttGGGTTGTTACGG
Scaffold104:425083-425282	Scaffold104	425083	425282	WHL22.16320	SPU_011090	TTAAGAGTTTTAAAAGAGATCCCCTTTTACGCTCTCTTTCCGAAGTCTAAAAATCAACCAGCGTTAAGCTCCTGGCTCGCTCCGCAGTTTTGGGTTAAGCCGCGACGCGCGCGCGCATGCATGCACACGCGAATCGCGGCGACTTATCCACCGCATACCTCGCGTTAGAGAGCAAACAATCTTTTGAAAATAGAAAAGC	42480	NW_022145597.1:6094258-6094457	NW_022145597.1	6094258	6094457	LOC590867	0	GCTTTTCTATTTTCAAAAGATTGTTTGCTCTCTAACGCGAGGTATGCGGTGGATAAGTCGCCGCGATTCGCGTGTGCATGCATGCGCGCGCGCGTCGCGGCTTAACCCAAAACTGCGGAGCGAGCCAGGAGCTTAACGCTGGTTGATTTTTAGACTTCGGAAAGAGAGCGTAAAAGGGGATCTCTTTTAAAACTCTTAA
Scaffold104:468068-468437	Scaffold104	468068	468437	WHL22.16487	SPU_003708	CTCTCTATCTCTCTCTCTCTCTCTCTATCTCTATCTCTCTCTCTCTCTCTCTCTCTCTCTCTGCCTCTCTGGCTTACTAATATTGCTGCTATCGTCATGATTGTTTACTATCAAAGGCAAATTACATCACGTACGTTGGTAGTATACCAAGATTCAAAGTTCATTTTCGTTTTCAGAATTCCCCTACAATAGACCGTATGGCTCAATACACTCTATTCCCAGACGATGAAATTCATAAGTAAACTGTGTGTCTGTCTTCCAATCGAGACTGCATGTGTATCAAGTACTCGAATCTGGTTCAATAAAATTATCGAACTTAATATTGTGTCAATCGCGGTGTACGTTTTAGTCTCGTGTCACTAGAATCCA	28409	NW_022145597.1:6053020-6053389	NW_022145597.1	6053020	6053389	LOC575507	0	TGGATTCTAGTGACACGAGACTAAAACGTACACCGCGATTGACACAATATTAAGTTCGATAATTTTATTGAACCAGATTCGAGTACTTGATACACATGCAGTCTCGATTGGAAGACAGACACACAGTTTACTTATGAATTTCATCGTCTGGGAATAGAGTGTATTGAGCCATACGGTCTATTGTAGGGGAATTCTGAAAACGAAAATGAACTTTGAATCTTGGTATACTACCAACGTACGTGATGTAATTTGCCTTTGATAGTAAACAATCATGACGATAGCAGCAATATTAGTAAGccagagaggcagagagagagagagagagagagagagagatagagatagagagagagagagagagatagagag
Scaffold104:469075-469386	Scaffold104	469075	469386	WHL22.16487	SPU_003708	CGATTATACCCAAGATTTGTGAATAATATAAGCTTGGTCGAGACCAGTTAACCGTGAAGGTTGTATCAGTGCAAATCAACATGCGTGGGAGACTCAAAGAAAAACTATAAAACCCAAGCTGAATCAGAAAATACTGTTTTGTTCGGAATCTATTCAAGTGATTTCAAGCGCACTATTTGCTTGCATCGAAGATTGAAAGAAAGTGCATTGACCCCTGAAGCAAACAATAATATATTCTCTGGATTAAAACCAGTTTTCTTCTACGAGAACACTATAGGAACGCTTCGCATAGGGCTCTCAATGTGGTTGAA	27460	NW_022145597.1:6052071-6052382	NW_022145597.1	6052071	6052382	LOC575507	0	TTCAACCACATTGAGAGCCCTATGCGAAGCGTTCCTATAGTGTTCTCGTAGAAGAAAACTGGTTTTAATCCAGagaatatattattgtttgctTCAGGGGTCAATGCACTTTCTTTCAATCTTCGATGCAAGCAAATAGTGCGCTTGAAATCACTTGAATAGATTCCGAACAAAACAGTATTTTCTGATTCAGCTTGGGTTTTATAGTTTTTCTTTGAGTCTCCCACGCATGTTGATTTGCACTGATACAACCTTCACGGTTAACTGGTCTCGACCAAGCTTATATTATTCACAAATCTTGGGTATAATCG
Scaffold104:588209-588568	Scaffold104	588209	588568	WHL22.16586	SPU_006651	ATAGTACCTCATTAAACTATGTATTATATCTGCATTGATTTTTTGTATGTCTATGTGGTATGCTCTGCTTTGATATTATAAATGGGCCATGACTTTGTGTGCTATAATATATTTATATCTCTGTACAAGTACTGATCCATAACTGTCTATTTTGATTATGAAATACATGCTGATTGTTTTTACATACATATTCCTGTTAGTCTTTAACTAAGTGCCCCGCACGCATCAAAGGGTATGAAATTTGTTCAAATTTTCGTTGAAACACGACCTTGGAATGACTAATAAATTAAGGGGGCGTACGCCTCGTGAATTCGCAAGCCATTATTCATAGCCTTTTACAATGATAACAAGACGATATC	222	NW_022145597.1:5939070-5939429	NW_022145597.1	5939070	5939429	LOC576314	192	GATATCGTCTTGTTATCATTGTAAAAGGCTATGAATAATGGCTTGCGAATTCACGAGGCGTACGCCCCCTTAATTTATTAGTCATTCCAAGGTCGTGTTTCAAcgaaaatttgaacaaatttcATACCCTTTGATGCGTGCGGGGCACTTAGTTAAAGACTAACAGGAATATGTATGTAAAAACAATCAGCATGtatttcataatcaaaatagacAGTTATGGATCAGTACTTGTAcagagatataaatatattatagcaCACAAAGTCATGGCCCATTTATAATATCAAAGCAGAGCATACCACATAGACATACAAAAAATCAATGCAGATATAATACATAGTTTAATGAGGTACTAT
Scaffold104:641848-642213	Scaffold104	641848	642213	WHL22.16607	SPU_011854	ACAAGGATAATATTATCAAAAAGATATTGCACGAGGTAAAGTAATATGGGTATATTACATTGAAGAACAATAAAATCAAAGTTATTAGAGGAAAGGTGCAATATGTCAACAACATGTTAAAGAGAATAATTATACAAGTAAAGAATTGAGAATACACAATAAGGCAATACACTTGCATGTAAACGGATAGTGATACACAGTAAAACTATTTGCTTATAAGGGGGAAGAAAGAAGAAAGAAAGAAAGACACAAAAAAAAGGGAAAAAAGAAAATTGTGATGACCCTAATGACATTTCAAGGAATAGAGAAATCATGCATCTTATAAACGATAGAGAGGAAACAGATACGAATAGAAGAAGAGAGGG	29395	NW_022145611.1:21650440-21650797	NW_022145611.1	21650440	21650797	LOC582819	602	ACAAGGATAATATTATCAAAAAGATATTGCACGAGGTAAAGTAATATGAGTATATTACATTGAAGAACAATAAAATCAAAGTTATTAGAGGAAAGGTGCAATATGTCAACAACGTGTTAAAGAGAATAATTATACAGGTAAATAATTGAGAATACACCATAAGGCAATACACTTGCATGTAAACGGATAGTGATACACAGTAAAACTATTTTCTTATAAggggggaagaaagaagaaagaaagaaagacaaaaaaaggaaaaaagaaagttgtGATGACCCCACATTCAAGGAATAGAGAAATCATGCATCTTATAAACGATAGAGAGGAAACAGATACGAATAgaagaagagaggg
Scaffold104:643673-643832	Scaffold104	643673	643832	WHL22.16607	SPU_011854	TATATATATATATATATATATATATATATATACACTGTATGCGTACGTGGGGGAAATCTATGCGCGTGCTGTAAGCAACGCCGCGATCATGCACAGAGCTAGATGCGCGCGTACACATTGCAACTAGTCTTTATATAGTTCAAAATCCTTATTAATTCA	31220	NW_022145600.1:31415201-31415572	NW_022145600.1	31415201	31415572	LOC115924187	936	CGCATTATGTAAATATGACAGTGAATCCCAAATTCATgctatgaaatatttgtttgttaaattTCTGCTCTTATTACAAAGGAGAGCTTGAAATATTTATCTTATGCCTTGTATAAAGTTTCAAATAAACACATTGTAATGTTTCCATTACTTAAGCAGTGTAACGTTTGGAATAAATAAGCAtttaatattgaattaataaGTATTTTGAACTATATAAAGACCAGTTGCAATGTGTACGCGCGCATCTAGCTCTGTGCATGATCGCGGCGTTGCTTACAGCACGCGCATAGATTTCCCCCACGTACGCATGATTTCCCCCACGTACGCATAGAGTGTATATATAAGATAGATTTTTCGGATTCGAGGCG
Scaffold104:712073-712355	Scaffold104	712073	712355	WHL22.15187	SPU_004318	CCACAGCAGCAGCTGCACCCTGGATGATTGGATGCTATTGTGAGAGCCACTTCTGTATGGTATCTCTGATTTGGGTCCTAGCCTGAGTGAGCTCAGCTGGATCATCCGGCGATGCAGGGTACATATTGGCACAGTGAGCAGTCCCTGTCATCAATGAAAGACAAGAAAGGGAATAATTAATATAGATAAAACATCATCGTCATCAACATCATCATCATCGCCATCATCATCATCATCATCATCATCATCATCACCATAATCATCATCTCCACATCATCATCA	0	NW_022145597.1:5850971-5851251	NW_022145597.1	5850971	5851251	LOC578404	0	tgtggatggtggagatgatgataatggtgatgatgatgatgatgatgatgatgatgatggcgatgatgatgatgttgatgacgatgatgtttTATCTATATTAATTATTCCCTTTCTTGTCTTTCATTGATGACAGGGACTGCTCACTGTGCCAATATGTACCCTGCATCGCCGGATGATCCAGCTGAGCTCACTCAGGCTAGGACCCAAATCAGAGATACCATACAGAAGTGGCTCTCACAATAGCATCCAATCATCCAGGGTGCAGCTGCTGCTGTGG
Scaffold104:726672-726851	Scaffold104	726672	726851	WHL22.15187	SPU_004318	AGAGCGGGAGAGAGAGAGAGGGGGGGCGGGACGCGACTTTGCGTTTTACACCCTGGCCTGGACCTTTTCCCAATAAATTTCAAGGAACCGACTGGGAAAAGTCTATCCATGACAAGATATTGCGCGCGCACGTAGCTCTTCTGCAATGCTCAACGTACGTCCTATATGTCCAGTGTCGG	0	NW_022145607.1:3422616-3422617	NW_022145607.1	3422616	3422617	LOC115928028	7758	t
Scaffold104:767110-767490	Scaffold104	767110	767490	WHL22.14836	SPU_004315	CAACAATAGAAATAGAGGTAGAGAGATGAAGGAAGAAAGAGGGGTAGAGAGGGAGAGGGAGTGAGAGGGATGGAAACTGAGAGAGAACTACAACAATAGAAATAGAGGTAGAGAGATGAAGGAAGAGAGAGGGGTAGAGAGGGAGAGGGAGGGAGAGAGATGGAAACTGAGAGAGAATTACAACAATAGAAATAGAGGTAGAGAGATGAAGGAAGAGAGAGGGGTAGAGAGGGAGAGGGAGTGAGAGGGATGGAAACTGAGAGAGAACTACAACAATAGAAATAGAGGTAGAGAGATGAAGGAAGAAAGAGGGGTAAAGAGGGAGAGACGGAGAGAAATTGAAATTTAGAGACACAAAGAAATGAGAGAGAGAGGAGAAG	0	NW_022145597.1:5795648-5796028	NW_022145597.1	5795648	5796028	LOC576106	0	cttctcctctctctctcatttctttgTGTCTCTAAATTTCaatttctctccgtctctccctctttacccctctttcttccttcatcTCTCTACCTCTATTTCTATTGTTGTAGTTCTCTCTCAGTTTCCAtccctctcactccctctccctctctacccctctctcttccttcatcTCTCTACCTCTATTTCTATTGTTGTAATTCTCTCTCagtttccatctctctccctccctctccctctctacccctctctcttccttcatcTCTCTACCTCTATTTCTATTGTTGTAGTTCTCTCTCAGTTTCCAtccctctcactccctctccctctctacccctctttcttccttcatcTCTCTACCTCTATTTCTATTGTTG
Scaffold104:809783-810308	Scaffold104	809783	810308	WHL22.14855	SPU_026447	AACTCTCTTTCTCTGCCTATTATCCCCCTCCTATTTTGTCAACTCACTCATATTTTGTTTTAATTGTTTCGCCGCTACCCCCCACCAAAAAAAAAACAGCCCGGCCTACAACAAAAGTGATACACGTAGTTACAATGAGATATCTAATGCATCATTTTAAGTGATAATATCAACAATTATACTGTATCTTCAAAGATCTGTCGGAAGTTGGAAATTTGTGAAAGTCTTTATTTTATGATGTTTAAGTTTAAAGCAAATTTATATTCTGCTTTCAATTAAGTGTTACGGATCGAGGTTAGATCGGATGTTTTTTCACTTGGAAAATTCCTTTTCCATAGTATGATGTGACCTGCATAGCTGAGTCAGGTGTTTAGTTCCGTTATACGCTAGATTGCGTAA…	1248	NW_022145602.1:23725039-23725564	NW_022145602.1	23725039	23725564	LOC574867	0	TGAGCTAACCACACCCAAGATAGAACTACTCGCCCATGCcgcgtacgtacgtacgtacgttaACATACGGACTAATTCatgcatacaataaaaaaaggaatgtcACTGCCACTTGGCCTAATGTCATTACGCAATCTAGCGTATAACGGAACTAAACACCTGACTCAGCTATGCAGGTCACATCATACTATGGAAAAGGAATTTTCCAAGTGAAAAAACATCCGATCTAACCTCGATCCGTAACACTTAATTGAAAGCAGAATATAAATTTGCTTTAAACTTAAACATCATAAAATAAAGACTTTCACAAATTTCCAACTTCCGACAGATCTTTGAAGATACAGTATAATTGTTGATATTATCACTTAAAATGATGCATTAGATATCTCATTGTAACTA…
Scaffold104:864876-865235	Scaffold104	864876	865235	WHL22.14951	SPU_004315	CAACAACAATATCAAACCAGGTTAGCATTCATACTACCATATCATGTGATCATATTAAATGCAATTACCTCACATTTCTGTAGATTTAAATGGGTGAAGATTACCTAGGCCGCTATTCTGAGATTCATTTTATCTCACTTGTACCCTTAAGTATTGTTTGATTATGTGAGAATTTATGATCTTTCATAACCACAAATCCGGGGTTGGCATGTTAATAAAAAACATTTGTTTTAAATCACAATCCTGCATGACTCGATAATACCTTCCATACAGTACATCAAAACAATGGTATTGTCCTAAGGAATCTATGAAGTTGGTGACCTTGATTTATGATGTTCTCATTCTATTCTAGGTTGGCG	0	NW_022145597.1:5713574-5713933	NW_022145597.1	5713574	5713933	LOC115918521	0	CGCCAACCTAGAATAGAATGAGAACATCATAAATCAAGGTCACCAACTTCATAGATTCCTTAGGACAATACCATTGTTTTGATGTACTGTATGGAAGGTATTATCGAGTCATGCAGGATtgtgatttaaaacaaatgttttttattaACATGCCAACCCCGGATTTGTGGTTATGAAAGATCATAAATTCTCACATAATCAAACAATACTTAAGGGTACAAGTGAGATAAAATGAATCTCAGAATAGCGGCCTAGGTAATCTTCACCCATTTAAATCTACAGAAATGTGAGGTAATTGCATTTAATATGATCACATGATATGGTAGTATGAATGCTAACCTGGtttgatattgttgttg
Scaffold104:892410-892747	Scaffold104	892410	892747	WHL22.15177	SPU_004317	CGGCCACAGCATTGAAGTGGTTAAGTGACATGGGATGGTATTCTGTAAACGTTGTTATATTTCATGCTAGTAAAACGATGTTACTTGTCATAACAAATCAAACTTAGGACAAGCCTTCTGTTAATGTCTGTGCAAATCTGGCTGCAATCGCGTAAGGTTACGCAAACACCAATGGTAAGTGTTAGTTATGACAATTAACATAATTTTCCCTGACATATAAACGACAAAACAGTTTATGGATTACGGCCCCAGAACTCTTCCACCTTTTCTAGTCTTTATCATATTGGTTACTACTGAATTCCTAGCCTTACTCTTATCACATGAATATGCTAATGGT	0	NW_022145597.1:5687677-5688039	NW_022145597.1	5687677	5688039	LOC100893394	0	ACCATTAGCATATTCATGTGATAAGAGTAAGGCTAGGAATTCAGTAGTAACCAATATGATAAAGACTAGAAAAGGTGGAAGAGTTCTGGGGCCGTAATCCATAAACTGTTTTGTCGTTTATATGTCAGGGAAAATTATGTTAATTGTCATAACTAACACTTACATGTACCATTGGTGTTTGCGTAGATGCATGTATCTCTTGTAACCTTACGCGATTGCAGCCAGATTTGCACAGACATTAACAGATGGCTTGTCCTAAGTTTGATTTGTTATGacaaataacattgttttactAGCATGAAATACAACAACGTTTACAGAATACCATCCCATGTCACTTAACCACTTCAATGCTGTGGCCG
Scaffold1040:121355-121755	Scaffold1040	121355	121755	WHL22.16634	SPU_006977	ATACACCTCCCAGGAGAACATCAAGGCGTCCGAACCGAGTTGCCCTGAGCAAATGGACACCACCTTGACAGATTGTAATCATAGGTGGATAACTCTGATCTAGATGAAGATATTGAGAGGTCAAGCAGTTACATGTATGTATGTATGGGGATGATTTTTAGTATGGCCCATGGTTGCGTGTATGTCTTTCAATGATGTATTGTGACAGTATTAATGATGAAAATATTCTGATGGATAAGAACGATTGGTGTGTACTCAGTCTTGATGCACCAATGTAAATTCCTTGGTGACTGGTTGTGTGGTGCTATAATTATTTAACTGTAAACTTCATCGCAATTGTTTATCCTCTGTTAATCCTCTGGTAATCCTCTGGTAAAATCTGTTTTTGTTCTTCACTCTA	0	NW_022145600.1:4897413-4897813	NW_022145600.1	4897413	4897813	LOC584784	0	ATACACCTCCCAGGAGAACATCAAGGCGTCCGAACCGAGTTGCCCTGAGCAAATGGACACCACCTTGACAGATTGTAATCATAGGTGGATAACTCTGATCTAGATGAAGATATTGAGAGGTCAagcagttacatgtatgtatgtatggggATGATTTTTAGTATGGCCCATGGTTGCGTGTATGTCTTTCAATGATGTATTGTGACAgtattaatgatgaaaatattctGATGGATAAGAACGATTGGTGTGTACTCAGTCTTGATGCACCAATGTAAATTCCTTGGTGACTGGTTGTGTGGTGCTATAATTATTTAACTGTAAACTTCATCGCAATTGTTTATCCTCTGTTAATCCTCTGGTAATCCTCTGGTAAAATCTGTTTTTGTTCTTCACTCTa
Scaffold1040:182838-183141	Scaffold1040	182838	183141	WHL22.16865	SPU_016595	GAGAGTTCTGAGTTTTCTTTCTTACCTGTTTTTCTTTTCTGTTTATTTTTCGTCTTTATTTGATCTCTCCCTCACACGAAATAAGATGGAACAAACAATGCATTTAAATAGGGAATTTTGATAGACTTGACGCATGGGATTACGACTGTTTGTAGATCGTGAAGAAAGTGAATTACTCCTTTTATTTTTCTTGAAGAGGTGCATAATTAGCACTGCACTTAAAAACGGGAATTCGGGCCAGATTATGGGACTCTACTTTTGTTGTTACTTGCCCAGAAGTTTAAAGAGGTTTATATTCATTGA	13664	NW_022145600.1:4956861-4957160	NW_022145600.1	4956861	4957160	LOC593111	0	GAGAGTTCTGAGTTTTCTTTCTTAcctgtttttcttttctgtttatttttcgTCTTTATTTGATCTCTCCCTCACACGAAATAAGATGGAACAAACAATGCATTTAAATAGGGAATTTTGATAGACTTGACGCATGGGATTACGACTGTTTGTAGATCGTGAAGAAAGTGAATTactccttttatttttcttgaagaGGTGCATAATTAGCACTGCACTTAAAAACGGGAATTCGGGTCAGATTATGGGACTCTACTTTTGTTGTTACTTGCCCAGAAGTTTAAAGAGGTTTATATTTA
Scaffold1040:37355-37881	Scaffold1040	37355	37881	WHL22.14988	N/A	CAAAGAAAACAAAATGGTGGCTTTCATTCTGGGAAACAATGCCTGAGCGGGGATTTAACTGTATCGGGTGAAACGTGATGCGGGTCTGAAAGGACGGGGCATTCTCAGCGGGCAAAAATAACATTTGCCTGCTTTACAAGCGTGAGGACCTGCACAATGGACCTGCCAAATTCGCCGGTAAATTACCCCGAAACGTTACGTGTTCCTCACGACAATATTTAATCGAATGGTCCGATAATGATCAGTAATGTTTGATCTACTCACCGATATATGATATGAGGTTTTTCCTGCCCCGTTCAAGCTCCTTTCGCAGCTGTTTTCGTTCTTGGTAGCAGCGTTGATTGCCACACTTCGCATACACGGCCATTTTCATAAATATGAGTTCAGTATTTTAATAGG…	0	NW_022145600.1:4825489-4826015	NW_022145600.1	4825489	4826015	LOC100893839	0	caaagaaaacaaaatggtgGCTTTCATTCTGGGAAACAATGCCTGAGCGGGGATTTAACTGTATCGGGTGAAACGTGATGCGGGTCTGAAAGGACGGGGCATTCTCAGCGGGCAAAAATAACATTTGCCTGCTTTACAAGCGTGAGGACCTGCACAATGGACCTGCCAAATTCGCCGGTAAATTACCCCGAAACGTTACGTGTTCCTCACGACAATATTTAATCGAATGGTCCGATAATGATCAGTAATGTTTGATCTACTCACCGATATATGATATGAGGTTTTTCCTGCCCCGTTCAAGCTCCTTTCGCAGCTGTTTTCGTTCTTGGTAGCAGCGTTGATTGCCACACTTCGCATACACGGCCATTTTCATAAATATGAGTTCAGTATTTTAATAGG…
Scaffold1041:103321-103686	Scaffold1041	103321	103686	WHL22.15250	SPU_002023	TGATATCATTTCGAAAGCTGTCTGCTATTGATGTGAATAGATTGAAGTTAGACATCGCTGAAAGCGAGCTCTGTATGCACACACCTAGTCCCCTCACTGAACTAGCTTTGTTGTATGATACTACGCTTAGTGATATCTTAGAGAAACATGCCCCTGTTGTTACTAAACAGATAGTGTTACGTCCCCAAGTACCGTGGTATACTGACTGTGTCAGGACAGAAAAAAGGAAAAAGAGAAAGGCTGAAAAGCGCTGGTTGAGAACTAGGGCCGATAGTGATTGGGACAACTATAAGTCTGTTCGAAATGCAACATTGAAACTTTTGAACAAAGCTCGTGGAAAATATCACAGAGATCTGATCATGGAA	8168	NW_022145604.1:9142145-9142510	NW_022145604.1	9142145	9142510	LOC105443099	0	TGATATCATTTCGAAAGCTGTCTGCTATTGATGTGAATAGATTGAAGTTAGACATCGCTGAAAGCGAGCTCTGTATGCACACACCTAGTACCCTCACTGAACTAGCTTTGTTGTATGATACTACGCTTAGTGATATCTTAGAGAAACATGCCCCTGTTGTTACTAAACAGATAGTGTTACGTCCCCAAGTACCGTGGTATACTGACTGTGTCAggacagaaaaaaggaaaaagagaaaggctgAAAAGCGCTGGTTGAAAACCAGGGCCGATAGTGATTGGGACAACTATAAGTCTGTTCGAAATGCAACATTGAAACTTTTGAACAAAGCTCGTGGAAAATATCACAGAGATCTGATCATGGAA
Scaffold1041:104590-104674	Scaffold1041	104590	104674	WHL22.15250	SPU_002023	CTGTACACTGCTAATCTCATTTCAAATGTTCGAACAAATTTCCCCGAGATATCATGCCACTGCTATGCAGATGACACACAGCTG	7180	NW_022145609.1:13132874-13132958	NW_022145609.1	13132874	13132958	LOC115928498	8730	CTGTACACTGCTAATCTCATTTCAAATGTTCGAACAAATTTCCCCGAGATATCATGCCActgctatgcagatgacacacaGCTG
Scaffold1041:142517-142943	Scaffold1041	142517	142943	WHL22.15257	SPU_027481	ACAACTATACAGCATATCATTTTCTCCTTAACATTGCTGTGATTTTTTATCTATGACTTTAGGTGACCTTTGATATGCCAAGAAATGGCGAAGACAGGCACACAGATAAAGAGATCAACTCTTTCAAATACATTTAAGTCCCTTTAATGCAAGGTTTTGAATGGTTTATATGTTTGCGTAGTAATGACTATACCCCAACCAAAGAGAGCTGCAATGAGTGTTAATCCATAGGTCAAATATTGGTGACCCTTTTCTTTTGTACCCCTTTACGACAAAATCATTCCTCTTTGTGATTCCATTCAATTACTCATTTGCACTTGTTCACAGGAAGGGCAATTGATCAAACTTTGGAGGGCAGTCTGGATTATATAAGCTCATTATCACACAAAATCTATGATG…	0	NW_022145610.1:35220842-35221271	NW_022145610.1	35220842	35221271	LOC594385	0	CGTATTTGTGATTGAGAATAATATATCCATCATAGATTTTGTGTGATAATGAGCTTAAATAATCCAGACTGCCCTCCAAAGTTTGATCAATTGCCCTTCCTGTGATAAAGTGCAAAAGAGTAATTGAATGGAATCACAATGAGGAATGATTTTGTCGTAAAGGGGTACAAAAGAAAAGGGTCACCAATATTTGACCTATGGATTAACACTCATTTCAGCTCTCTTTGGTTGGGGTATTGTCATTACTACGCAAACATATAAACCATTCAAAACCTTGCATTAAGGGACGTAAATGTATTTGAAAGAGTTGATCTCTTTATCTGTGTGCTTGTCTACGCCATTTCTTGGCATATCAAAGGTCGCATAAAGTCATAGATAAAAAATCACAGCATGCAATGT…
Scaffold1041:70820-70901	Scaffold1041	70820	70901	WHL22.15245	SPU_001581	CCGCCCCTAAAATAAAATCCTAGCTACGCGGGTGGGGAGTTAGCGTAAATGACCATGATGACACCCACAAAAACTAACATT	212	NW_022145610.1:32248449-32248530	NW_022145610.1	32248449	32248530	LOC583647	4418	AATGTTAGTTTTTGTGGgtgtcatcatggtcatttACGCTAACTCCCCACccgcgtagctaggattttattttaggggggg
Scaffold1041:82482-82770	Scaffold1041	82482	82770	WHL22.15245	SPU_001581	CCCGCCTTCACATTCTGTGTGTTGTTGTCTGCGACCGTGATGAACGTACTGTGGTACGTCAGGGGCATGTTAGCAGGGATGACGGGTGCATTCAAGCACTGGCCTAAAAATGAATAATAATGTAATAATGACAATAATGATAACAACATCAGACTACTTCTACTACTACTTCTACTACTACTACTACTACTACTACTACTACTACTACTACTACTACTACTATACTACTACTACTACTACTACATGTATTACTACTACTACTTCTGCTACTACTACTACTTCTACCCG	0	N/A	N/A	N/A	N/A	N/A	N/A	N/A
Scaffold1041:84212-84384	Scaffold1041	84212	84384	WHL22.15245	SPU_001581	ACCATCAGCCCCTGTGACACCGTTTATAGTGGTAATGAAGTGGCCGTAGATAGGATTCACAGTTGCATCGAAGCTAGAAATATAAGAATAAGAAAGAACATTAATAAATTGACTGAAAATGAAGGAGGAAGTATGACAAAAGATGAGGATATTGTATTTTGTTTTCCGAAAG	0	N/A	N/A	N/A	N/A	N/A	N/A	N/A
Scaffold1042:44484-45317	Scaffold1042	44484	45317	WHL22.16108	SPU_005856	GAACTTTTCTTCTGTTGGCAGACAGAGGATTTCTCGATCTGGCTGACAGATCTCATGCAGTTTGGGCAATTATCCATCGATCTATATTCTTTCTACCAAATTCACCTTGTTTGTTATATACACCCGACCTACAACTTCTGAACTTGGGCAATGGGCGTTGAGCGACAGCGACAATATCCATTCAACTCGTAAATCTCTAATAGCCTTGCACCGTACCGATATACCTAGGTTAGGCCTATTCATGGCCTTGGCCTTACCGTTTCATTACTGCCCTCTGCGCATGCGCACCCCGGTCAGCGGTCTAAAGGTGAGGACTGAAAAGTACATGTCAACCCTGTCGTGGCCATCGCCAAGCTTTTAATCCCACCGTGTTTGTATACAAGATATCTACTGGTACCA…	2496	NW_022145602.1:26052847-26053679	NW_022145602.1	26052847	26053679	LOC589483	2493	CTTGTTTACGCCTATAAAAATGTCACGTTAGTCGTCAAGTCTTAAATAGTACATTTACCATTGAAAGAGCAACTTACAGTACCATTTCTTCATGTAGGACTAGTAGGAGTAGACCAGTGAGTTAGCACTATTACATGTAGCATCATGCATGTATGTCCGAGACTCTAAACTTTTATTTAGCTGGCCTCTCAAGTGGAAACAataggacttttagatttgcacaaccacaacgtggattgctacgaccgacgtccttttaatgcactgccttgaacgaacgtcacacgtatcagtccacgcaaatctaaaagtccctgctATTTCGACGTCAACGGCTTCTGCAGACTGCATTGTTACTGGTTATTGGCATCGGCGATTTGTTACGCCGTGTTTATTGAT…
Scaffold1042:45541-46172	Scaffold1042	45541	46172	WHL22.16108	SPU_005856	TCTGTATACAGCTATTTTTGCCTTTCTTTTATTGAGGTTTCTGATTCTATTTAGAATACCTCTATTTTTGTTTTGCTTTGTTTTGTCTGTTTGCTTTGCTGATAATCCCATCATGTCAGGACTTGAGTTAACATATTTGAATTTAAATTGTGTGCTGGGAGGGGGGGGGGGGGTGTTGTTGTTTTTTAAGTATCAGCAAGTTAGGACATGTCAGACACCAGGCGGTTGGTATCTGTTATGATATCGCTATCAGTCAGGCATATAATACTGATATCGCCAGAAATGTGTCTTCGGCTATTCAATTTATTCTAAACGATCTGATCCTTGCAGGCATAATGTTTTCCATTTGAAGAGGTAGATAATAATAGCTCAACACTTCTTGATGGCCATGGACATGTT…	1641	NW_022145602.1:26051992-26052623	NW_022145602.1	26051992	26052623	LOC589483	1638	AAAGTCgctcttagtctttgtgaaacactcccttgAACTAAACTTTAAAACCGTCTTGAGTCACAGCTGGGGCGCTCGATTTTAATTCTCATCACAAATCGGGATTCCCCTTTGGACTGTCTCGACGATTCCACGTCTCAATTCTGACATGTCTGAACACGACTGGACAGGACAATCAAAATAAACCTTCAAATAGATAATAGACAGCTTCTCGTTTATGGAAACAAGTCAAAACATGTCCATGGCCATCAAGAAGTGTTGAGCTATTATTATCTACCTCTTCAAATGGAAAACATTATGCCTGCAAGGATCAGATCGTTTAGAATAAATTGAATAGCCGAAGACACATTTCTGGCGATATCAGTATTATATGCCTGACTGATAGCGATATCATAACAG…
Scaffold1042:46335-46602	Scaffold1042	46335	46602	WHL22.16108	SPU_005856	GGTGAGGGTAAACAGCAGTATGAACGGCAAGCCATAGTTAAGTCCAACTTAAAGTCGATCTTAGTCTTTGTGAAACACCCCCATGGCAACCCTAGGGCATGTTTGTACTTGTACATGTATTCATAAACGAGAAGACACATATAGGTGTATACTGTCATGTTTTGAAATCATTAGAATGATAAGAAAATGGCAGAATCTAGCTAAGAGTTCAATGCACTTTGCAAGGAAATTTGACGACACAAACATATTTTGACGACACCAACCTTT	1211	NW_022145602.1:26051566-26051830	NW_022145602.1	26051566	26051830	LOC589483	1212	AAAGGTTGGTGTCGTCAAATGTTTGTGTCGTCAAATTTCCTTGCAAAGTGCATTGAACTCTTAGCTAGATTctgccaatttcttatcattctaaTGATTTCAAAACATGACAGTATACACCTATATGTGTCTTCTCgtttatgaatacatgtacaagtacaaacATGCCCTAGGGTTgccatgggggtgtttcacaaagactaagatcgactttaagttggacttaactatggcttGCCGTTCATACTGCTGTTTACCCTCACC
Scaffold1042:50887-51264	Scaffold1042	50887	51264	WHL22.16108	SPU_005856	CCTTCACCACTGCCTCTTACACAGGTATCAATTTTGACCTTACTGTCTGTTATATACCTGAATACTAGATAAAGTTTAAATTGTCTATCCTCTTCCTTAACGATACTGTTGACCGGTTCAAGGGGAAACTGATTAAACGATACGCTATTGGATCTGGGACCAGTTTCACAAAGCCTTTTTTCAATGACAAATAACAAAAATCAGTGACAAATCTGCTGATAACCAATCAGAAGCAAGGATTTCTGTAGCTTATAACAAAAACTGTCATTTGTCACTGATGACAAGTTTTGTGAAACACCCACCCGATTGGAAATAGATATGCGAACAATCAGTGTTATGCTGATATCTGAAAGGGTGGATTACCCTTTTATGCAATT	0	NW_022145602.1:26046906-26047283	NW_022145602.1	26046906	26047283	LOC589483	0	AATTGCATAAAAGGGTAATCCACCCTTTCAGATATCAGCATAACACTGATTGTTCGCATATCTATTTCCAATCGggtgggtgtttcacaaaacttgtcatcagtgacaaatgacagtttttgttataagctacagaaatccttgcttctgattggttatcagcagatttgtcactgatttttgttatttgtcattgaaaaaaggctttgtgaaactggTCCCAGATCCAATAGCGTATCGTTTAATCAGTTTCCCCTTGAACCGGTCAACAGTATCGTTAAGGAAGAGGATAGACAATTTAAACTTTATCTAGTATTCAGGTATATAACAGACAGTAAGGTCAAAATTGATACCTGTGTAAGAGGCAGTGGTGAAGG
Scaffold1042:52012-52688	Scaffold1042	52012	52688	WHL22.16108	SPU_005856	AAAGGCCAATGGAGATTATCACAAGGGCTCTGTTTGACAAGTAGACACTAGTCCGTCTTTTGGTCCCGATTGAAAGGGGAAAAAAATAATCAAGCACTACTACCACTCAGTTTGAAAGCTATTGTTGGAAGACTGTATTCATTAGATTCAGAATAACAATAGGAATTCACCGTTGTTCGGTAGTTTCAAAGCTCTTTGACCGCATAGCGCCCTACAAAATGTAAACAGATTCACCAGCATAAGCTTTCAAAAAGAATCTGGATTTTCCTATTCTTAGCACGATGAATAAAAGGCAATGATGGAGATTTGGGAACAAGAGTGCGTTAAATCATGGGCCCACTAGGTCATGGTTAAATGATCATTCTAATTATCTAGATTAACCCACCCAACCAACAGGCC…	0	NW_022145602.1:26045476-26046158	NW_022145602.1	26045476	26046158	LOC589483	0	TGCCTACTAAGAGGAGATTCATCGCCCTTTTTATAGTGAATTCATGAAGTAACCCAAATTAATATTCCAATACACTCTTTCGATGATTTTTTACGAAAATTATTATCGCACGTTGTGTCTCAAGGTTCGCGAATAACCAACTCGACCAAGTTTTTTGATTAATGTTATTCTAAGAGTAAAATAATGACTTCAATAAAGCAGAAAGTCAAGATAACTGGTGATATttataccatggacctacaGTAAATCCATGTTATTACTTTATAACACGGTCATATGTATGTAGGCCTGTTGGATGGGCGGGTTAATCTAGATAATTAGAATGATCATTTAACCATGACCTAGTGGGCCCATGATTTAATGCACTCTTGTTCCCAAATCTCCATCATTGCCTTTTAT…
Scaffold1042:55561-56223	Scaffold1042	55561	56223	WHL22.16108	SPU_005856	CAGGCAAACGAAACCTCTTTCTAGTCTCTGGTGCTAGTGCACCCAAATCTCGTTATGAAATAAATCACAGGACAAAGATGGAAAAGACAAAAGGCATTGTATTTAGACAACTGCACGAGCTGGGCAGGGGCCATCAACACCACGCGTTAGACAGACACACACGACCATGCACCCCAGGCCCAGTTCTCAAAACTTTCCCACAGATTTCAGCGTCCCCTTTGTCTTGGCTATCTGGTACAGGCTTTTGTTGCCCTGGAGATAAATGAAGTGATTTTTCCAACACGGACTAGCACAACAGGTCATCAGCGGATTCTTTCCCAGCGCTCGTCCACTGGTCGACCATAGAGGCACTTGTCGCCGTTCGTGCGAATATTCTTTGCATGACAAAGGCCTTCGAGG…	0	NW_022145602.1:26041916-26042578	NW_022145602.1	26041916	26042578	LOC589483	0	GGTCACaagcgaaaaagaaaaaaggtgtttattttgtattctattgaTCGTGAATCGACACAAAGTGGTGGACATTGGGACGACCACGGCGAAGGACTCCGATGAAGGACCTCGCGTGGGCTACAGTTGTCCAAATAATCACAAGAACCGGCTTTGTTGTTTGCTTTATTTTCCTCTTGTATGAGATGACATTGGTGACCAGTCGTGCAGATACAAGAAAGGGCATCCGACCATGGACCTCGAGCGCTGCAGAGGCGTTCATACCTCGAAGGCCTTTGTCATGCAAAGAATATTCGCACGAACGGCGACAAGTGCCTCTATGGTCGACCAGTGGACGAGCGCTGGGAAAGAATCCGCTGATGACCTGTTGTGCTAGTCCGTGTTGGAAAAATCACTTCA…
Scaffold1042:56466-56920	Scaffold1042	56466	56920	WHL22.16108	SPU_005856	AGTATTTAATTATTTATATAGGATATATTTATACCTTTATGATGCCTTATTCCCGTACATTATAAGGTCTGGTTTCCGTGGTAAGTCGAACATTTCTTTCCACAATAATTCCGCTTATTATTAGGGTAAATGTACTTTGCCAAACTAGGCAATATTAGCAACAGTTTAGTCGTAACTAGGCAACCGTGTGCAAACACAAGTTCACGTCAATCACATGAACTGAGACCGAGAGTGTAGTATTTCGCTCAAAATATGTTTGCTTACTCGAAGTTACTCGACCTAAACGTATTTATGGCGTCGTCCCAAAACAGGAGCTCCAATCTCGAGATCAAAGGTCATGATAAAATAAGTGAGTAAAATACAAAAACAAAATGCTCTGGAAGTGTGTGGATGGGCGTG…	0	NW_022145602.1:26041219-26041673	NW_022145602.1	26041219	26041673	LOC589483	0	GTAATATCAAGCTTCGTGAGATGACACGTGGTGTAACGCGTCGCCTTTCATAATCCACGCCCATCCACACACTTCCAgagcattttgtttttgtattttactcACTTATTTTATCATGACCTTTGATCTCGAGATTGGAGCTCCTGTTTTGGGACGACGCCATAAATACGTTTAGGTCGAGTAACTTCGAGTAAGCAAACATATTTTGAGCGAAATACTACACTCTCGGTCTCAGTTCATGTGATTGACGTGAACTTGTGTTTGCACACGGTTGCCTAGTTACGACTAAACTGTTGCTAATATTGCCTAGTTTGGCAAAGTACATTTACCCTAATAATAAGCGGAATTATTGTGGAAAGAAATGTTCGACTTACCACGGAAACCAGACCTTATAATGTA…
Scaffold1042:57974-58662	Scaffold1042	57974	58662	WHL22.16108	SPU_005856	ATCTCTCTTCATGTTCTTGGAAATTTGGGGAATATTTAATTCATGTAAACACCTGGAATACCAAGACTATGCATTTCAGCTTGTGGTTTTGTATAATGTAAACTCCTGGATTTCAAAGACTACGCTTATGTGAACGCTGTGCTAAGCCATAAAAGCCAACTGGACACGTATTGTTTTTCGGTCGAGGCGTGCGACTCCGTGATTGACAGGTCGCGCACGGGGACCCCGACGCTTTTCGGCTCGCTGTACCTCTGTCTCTACCTGTGCGCTAGAGATGAGGGTCTATTGTTTAGCGTTACACGGTCCTAACACGGCAACTAGACCGCTCAACAATAACAGAGGGATGAAAAACTGGTAAGAGGTGTAGCGACAACTGATCGATAAAGTCGTCACTCGCCC…	0	NW_022145602.1:26039479-26040167	NW_022145602.1	26039479	26040167	LOC589483	0	TGAGAAATCCGATTTCGTGTGAATTTGAAAATCGGGAAGCGAGAACTCGTCAGCACAAAATACTAGTCAGATTATGTAATTTCCTTGTTATTTTTTACACCTGCGTGACTCTTATAGAATTTAGCGCATGCGCAACAAGACGAATGGGGTTTAGGCCTACTGTATTCGAGTATATATCGGATGTTTATTTTAGAACACATAAGTAAGTACTTGAAATAGTTATCACGAGTTGAAGTCGCTGCTTCTACTGTTATGCTGTATTACCTGTGTTCTATAATTACAGAGGGTTGGGCGAGTGACGACTTTATCGATCAGTTGTCGCTACACCTCTTACCAGTTTTTCATCCCTCTGTTATTGTTGAGCGGTCTAGTTGCCGTGTTAGGACCGTGTAACGCTAA…
Scaffold1042:58840-59205	Scaffold1042	58840	59205	WHL22.16108	SPU_005856	GTGTGCCAACTTCAGCCCAGGGATGTTGTTCATTAGCAAAGATGTTCTTTGAAACCATGAATGCGTCATAGGATACAAGATAAAGTGGACAGGGACGTGTCATTTCCCTGTTCTAAGTCAAGCCATGTCAGAGACGTGGGAAATCCGCCTTTAAGCTTAAGAAAGAGCTTCCTGCAAGGTGAGAATCCCGGTACTAATCGGAGAACTATAGAAGAAGGAGGAAGTACGGACAAGACTAACGAAAAGACTTACAGAAAAGCCATCCCATTTATCAAGGGGATTTGTAAACCAAGAAGCTAACTGTCAACCGAAGGAATAGAAGTTTACTTACTCTTTCGAGTATGTTATGTCGCTTCGAATAGCAT	0	NW_022145602.1:26038936-26039301	NW_022145602.1	26038936	26039301	LOC589483	0	ATGCTATTCGAAGCGACATAACATACTCGAAAGAGTAAGTAAACTTCTATTCCTTCGGTTGACAGTTAGCTTCTTGGTTTACAAATCCCCTTGATAAATGGGATGGCTTTTCTGTAAGTCTTTTCGTTAGTCTTGTCCGTACTTCCTCCTTCTTCTATAGTTCTCCGATTAGTACCGGGATTCTCACCTTGCAGGAAGCTCTTTCTTAAGCTTAAAGGCGGATTTCCCACGTCTCTGACATGGCTTGACTTAGAACAGGGAAATGACACGTCCCTGTCCACTTTATCTTGTATCCTATGACGCATTCATGGTTTCAAAGAACATCTTTGCTAATGAACAACATCCCTGGGCTGAAGTTGGCACAC
Scaffold1042:59413-60077	Scaffold1042	59413	60077	WHL22.16108	SPU_005856	ACGAAGAGGAAGGGTAGTATGTACATGTATACTTGATTGAAAATTAATTCAGATATTGGCTCATCAAAATGTTATAGGAGAGGTATTTCGTCATCGATACAATTATTACAACAGAACGTTCCGAATCCTGAGCAGGTAACCAATAACCATTGATATGTATACCAGGATATTTCACAGTATCTTCATGACAAGTCAAAACAAGTATAGTGTTTACACAATACCGCAATCAAGGGTATGATATTATAAAAATGACGCATGGATAGAGAATCGGCAGCGAGTCTGAACACGTTTTTGACTATTTTTCTTCCTCTCCTGTCAATGTTTTTTCTTTCTTGCCGCTGCTCGTTCAGACGTGACTCGACTTGTTTACTACAAGAGAGCAAGATCTTTAACCTTCGG…	0	NW_022145602.1:26038065-26038729	NW_022145602.1	26038065	26038729	LOC589483	0	tctttctgtcatccactacttttttcttctacattgcatccatttcattttcatgtggTCTTCTCTTCGATGACTGCATTGATTTTGCACAAGGCAGCTATCTTCTTCCATGCTACACACTTCGTCTCTGTTTTACTTTCATTTGCGTGAGGGGTTGCGTTTGCAGATTTATTTGCCCAAAAGTGCCAAGATGCTCAGTTTTAGGGCAACGccttttatttcttctcctCATAGGGATGCATGCACGCGCACACATACACTAGCACCGAAGGTTAAAGATCTTGCTCTCTTGTAGTAAACAAGTCGAGTCACGTCTGAACGAGCAGcggcaagaaagaaaaaacattgacaggagaggaagaaaaatagtCAAAAACGTGTTCAGACTCGCTGCCGATT…
Scaffold1042:62749-63016	Scaffold1042	62749	63016	WHL22.16108	SPU_005856	AAATAAATAATGAGCCCAGTGGCCCTGTCTTATAAACGGTGGCGATTAAGAGATAGGATACTGTTATCTTGCGATTGATTGGAGGACTTGCGATTGATTAGGATCAATCGTAACTCTTTATAAGACGAGGGCTCAAATCTACAAATTATTCGCAAATGTTTCATAGCAGGCAAGGAACAAGGCCCTTCGCCTTGCTTCATTCTGATACCATCTTTCAAGAATTGTACAACTCTTCGATGTCTGTTAGGTCCATGGTTTTCACCAAAG	1786	NW_022145602.1:26035128-26035395	NW_022145602.1	26035128	26035395	LOC589483	0	CTTTGGTGAAAACCATGGACCTAACACACATCGAAGAGTTGTACAATTCTTGAAAGATGGTATCAGAATGAAGCAAGGCGAAGGGCCCTGTTCCTTGCCTGCCATGAAACATTTGCGAAGAATTTGTAGATTTGAGCCctcgtcttataaagagttgcgattgatcctagtcaatcgcaagtcctccaatcaatcgcaagatAACAGTATCCTATCTCTTAATCGCCACcgtttataagacagggccactgggctcattatttattt
Scaffold1042:66060-66620	Scaffold1042	66060	66620	WHL22.16108	SPU_005856	ATCCGATTGAAATTGAAGGAAATATTCCGTTATTTTGTTACCCAACATATACAGCAGACTACCCAAGCTCAGGCGATTGGCATTCGTTTGGTAATCGTTGAGTGCAATGAATGTGAGTCACGCCCACACAATACTACGATGTTTGTACTCTGTACCCACGTGTTGCGATTCGCATTTGGCGGGAGATCGCTACTACGAGCCCACGTGCAAAAATATAACAATGCTATGAATGCAGAGCTCAGCGATCGTGTGACAGAAAATACTACGTTTCGCTGGTGTTCGCGATTAGGCGTTCTTATTCACATGAGCGTAATGAGAATCCAGCAACGCACCAGCTAAATATGATCTTGTTTTTGGTGTAATTATGGTTCGGTTTGCTGTGTAGGCAAAGTTCACGTT…	5097	NW_022145602.1:26031537-26032097	NW_022145602.1	26031537	26032097	LOC589483	0	gcatttgATCACATTTTGATCTGCTTTATCGTTATAGATCTATGCCTATCCAAACAAAAATTAGGACTAGGCCTATTTTCGTGATGATGACTCATCGACATTTATAAATGCATTGAAGCTGCCGAATCAGCAATATTTCAATAACGTACACGTTCTTATAAAACGTGAACTTTGCCTACACAGCAAACCGAACCATAATTACACCAAAAACAAGATCATATTTAGCTGGTGCGTTGCTGGATTCTCATTACGCTCATGTGAATAAGAACGCCTAATCGCGAACACCAGCGAAACGTAGTATTTTCTGTCACACGATCGCTGAGCTCTGCATTCATAgcattgttatatttttgcaCGTGGGCTCGTAGTAGCGATCTCCCGCCAAATGCGAATCGCAAC…
Scaffold1042:69231-69560	Scaffold1042	69231	69560	WHL22.16108	SPU_005856	GGACCAATGGAATGAAATGTGAATTGACAAGATCAGCAATTGGGGGTGGTACTATTGGCAGTGGGCGTGTCATCATGTCATCATCTTTTTTTTAAAGTCCTCCCCCCCCCTCCTCCCCTCCCTTCCCCACTCCTCTTTCCTTCTCTCCTCTCTCTCTCTTTCTCTCTCTCTCTTTCTTTCTTTAGTTCACTATAATGATCGTCAGCTAACTGTTTCACTTTATCCAAACATTATAAAAACCTTTTATGAATTGATAGGCAAATATAATACACAAATATCTCACAAAATGTAGTTTCATTTATAACTAAAAATTGCCAGTCAATGCAGGC	8268	NW_022145602.1:26028605-26028933	NW_022145602.1	26028605	26028933	LOC589483	3080	GCCTGCATTGACTGGCAATttttagttataaatgaaacTACATTTTGTGAGATATTTGTGTATTATATTTGCCTATCAATTCATAAAAGGTTTTTATAATGTTTGGATAAAGTGAAACAGTTAGCTGACGATCATTATAGTGaactaaagaaagaaagagagagagagaaagagagagagaggagagaaggaaagaggagtggggaagggaggggaggagggggggggaggactttaaaaaaaagatgatgacaTGATGACACGCCCACTGCCAATAGTACCACCCCCAATTGCTgatcttggatcttggatttCATTCCATTGGTCC
Scaffold1043:244239-244530	Scaffold1043	244239	244530	WHL22.15727	SPU_006867	CCCCATTTTCCCCTTCTCATTTGCTCCTTAAATCCCCATTTTGGAACTGGCCTCTACACACCCCTGAATACAAATAAATTTGATAATTGGGAAATGCATATTTTGAGATGATTTCGGGTAGAGAGGATGTTGAGTAAGTAAGTGGAACGATCGTAGAGCCCCAACGACCATTCTCTCAAGTAATAAAATCTTTTATTAGATGGCGAGTGTCGTCAAATAAAGTAATAACCTCCATCAATTGGCTGCATTCTTTTGTGATTTCGATTGGTATTACTGCTGTCAGGTGGGCTG	0	NW_022145599.1:30091310-30091601	NW_022145599.1	30091310	30091601	LOC100889000	0	cagcccacctgacagCAGTAATACCAATCGAAATCACAAAAGAATGCAGCCAATTGATGGAGGTTATTACTTTATTTGACGACACTCGCCATCTAATAAAAGATTTTATTACTTGAGAGAATGGTCGTTGGGGCTCTACGATCGTTCCACTTACTTACTCAACATCCTCTCTACCCGAAATCATCTCAAAATATGCATTTCCCAATTatcaaatttatttgtattcaggGGTGTGTAGAGGCCAGTTCCAAAATGGGGATTTAAGGAGCAaatgagaaggggaaaatgGGG
Scaffold1043:245430-245714	Scaffold1043	245430	245714	WHL22.15727	SPU_006867	CTCTGCGCGATGTGTAGCGAAGATACCATAGACGCAAAGGAATTTTCCCTAGTCGCTACATTTAGGCGATTGACTAGTGTCGACTATGATTTGTATTCTAGTCTCGCTTCGGTTTTAGGGAACTTTATTTCCAAAGAGGCAAAAATGGATAAACCAACAAATGCCAGGATCACTTAATGGGTACCTTTAAGTCCCATATTGACATCATAAAAAGAACAGGAAATCAAAACTAACAGTTACTCAGGCACGGCGGGCTACCGGCTTCTTTGCATCACGTCCAATTG	0	NW_022145599.1:30090126-30090410	NW_022145599.1	30090126	30090410	LOC100889000	0	CAATTGGACGTGATGCAAAGAAGCCGGTAGCCCGCCGTGCCTGAGTAACTGTTAGTTTTGATTTCCTGTTCTTTTTATGATGTCAATATGGGACTTAAAGGTACCCATTAAGTGATCCTGGCATTTGTTGGTTTATCCATTTTTGCCTCTTTGGAAATAAAGTTCCCTAAAACCGAAGCGAGACTAGAATACAAATCATAGTCGACACTAGTCAATCGCCTAAATGTAGCGACTAGGGAAAATTCCTTTGCGTCTATGGTATCTTCGCTACACATCGCGCAGAG
Scaffold1043:258016-258178	Scaffold1043	258016	258178	WHL22.15727	SPU_006867	TCATTCAGACTGTGCAGTCGAGAATGGTTTTTGACACGCCATGCTCAAAACAATAGAGCTCGGTGAAGTGTGTATGGATCAGTGTCATTAAGGTATCATTTGAAAGCATATGACTTGGAATTAGTTTATAGAGCACTTACCTAGTCTGCATAAATTAACCCT	0	NW_022145599.1:30077602-30077763	NW_022145599.1	30077602	30077763	LOC100889000	0	AGGGTTAATTTATGCAGACTAGGTAGTGCTCTATAAACTAATTCCAAGTCATATGCTTTCAAATGATACCTTAATGACACTGATCCATACACACTTCACCGAGCTCTATTGTTTTGAGCATGGCGTGTCAAAAACCATTCTCGACTGCACAGTCTGAATGA
Scaffold1043:57230-57657	Scaffold1043	57230	57657	WHL22.15607	SPU_026547	AAAGAAGTTTTCAAAGAGTTTAAATGTTAGCTGCATGTTCAAAGTCAGCTGTCTATGCCCCACCCCTTCTCCTTTCATTATGTAGCGAGGTAGAGATCTTCCCTTTAAACCATGTGAACTCTTCCTCTCTCTCTCTCTCTCCTATTTCATCATCCTCTCTACTGGAGGTCAACAAACTATGGTGAGATGAAACCTGGTCATTTCCACTTGTCCGAATATTTCAAGAATAGGATCTTTGTAGATAATGAGAATGCCCCTTATTTTATTGGAGTTTAGGTCCATTCACATGAATGAAAGGTTAGGATTAAATCTGTTCACATAAAAAAGTAACATGACCTATAGTAGACAAAGCCCCTATTCTACCAGTGTTACCAGAACTTAAGACTTAGATTTATTTAC…	31752	NW_022145603.1:13526178-13526767	NW_022145603.1	13526178	13526767	LOC115925436	251	GCTCATTGGACAGTTGGGTATATCCCTGCTATACTTCCTGCGCTGACTCAACTCCTTTTCCAAGAAAACAAATGCTTTGTCCACCAGCCCAAACTGGTATCCGCAGAGGCAGAGGGACAATTTATATGTTTGCTTATAATCAAAGATTGTCAACATTAACTTCCTCTCTCTGTGTTTCTAATCCTGGGGTAAATAAATCTAAGTCTTAAGTTCTGGTAACACTGGTAGAATAGGGGCTTTGTCTACTATAGGTCATGTTACTTTTTTATGTGAACAGATTTAATCCTAACCTTTCATTCATGTGAATGGACCTAAACTCCAATAAAATAAGGGGCATTCTCATTATCTACAAAGATCCTATTCTTGGAATATTTGTACTAGTGGAAATGACCAGGTATT…
Scaffold1043:59277-59603	Scaffold1043	59277	59603	WHL22.15607	SPU_026547	CCCTATCTTGGAAGGCCTCTAACATTGATGAGAAAGTTGACCTGCCCGTTTGGCCCAGCAAGTACTCCAGTCCAATTTTTTCTCCTATAAATATAAGTAAAAAATAATAAAAAAGTTATACACCGAAAAATTCTCCTTGTGCAGGATGTACTGATCAACCAGGTTTACACCCTACTCTTTTCAAATAGTTTCCTAGGTTCTTTAGCGTGCATGAGGTGTGATTGTCTCATACACGGGACCTCCATTCATCATCCTATCCGAGGGACTAGCTTCTGCAGACATAGTAATGAGACAAATCACAAGAACTTCCTATCCCTCATGGGTCG	29806	NW_022145603.1:13516031-13516357	NW_022145603.1	13516031	13516357	LOC115925435	0	CGACCCATGAGGGATAGGAAGTTCTTGTGATTTGTCTCATTACTAAGTCTGCAGAAGCTAGTCCCTCGGATAGGAAGATGAATGGAGGTCCCGTGTATGAGACAATCACACCTCATGCACGCTAAAGAACCTAGGAAACTATTTGAAAAGAGTAGGGTGTAAACCTGGTTGATCAGTACATCCTGCACAAGGAGAATTTTTCGGTGTAtaacttttttattattttttacttatATTTATAGGAGAAAAAATTGGACTGGAGTACTTGCTGGGCCAAACGGGCAGGTCAACTTTCTCATCAATGTTAGAGGCCTTCCAAAATAGGG
Scaffold1044:214497-214873	Scaffold1044	214497	214873	WHL22.16001	SPU_011502	CAGTGGTCACCTGAACCGTCATTTCAGAACACACAGTGGAGAAAAGCTTTATCAGTGTCCCAATTGTGAAAGAAGATTTTCTGAAGAGACTAAGCTTACTAGGCACCTTAGAACACATACAGGAGAGAAATCCTTTAAGTGTTCCCAGTGTAATAAGGGTTTTTCTCATAAAAGTACTTTTATTAGGCACCTTAGATCACATACAGGAGAGAAACCCTTTAAGTGTGTACAATGTGATAAGGGTTTTTCTCATAAAGGTTCTCTTATTCTTCATTTAAGAATACACAGTGGTGAAAAGCCTTATCAGTGTCCCAATTGTGAAAAAAGATATTCTGAAAAGACTAAGCTTACTAACCACCTTAGAACACATACAGGA	0	NW_022145595.1:25215261-25215637	NW_022145595.1	25215261	25215637	LOC752837	0	CAGTGGTCACCTGAACCGTCATTTCagaacacacagtggagaaaagcTTTATCAGTGTCCCAATTGTGAAAGAAGATTTTCTGAAGAGACTAAGCTTACTAggcaccttagaacacatacaggagagaaatcctttaagtgttcccagtgtAATAAGGGTTTTTCTCATAAAAGTACTTTTATTAGGCACCTTAGatcacatacaggagagaaaccctttaagtgtGTACAATGTGATAAGGGTTTTTCTCATAAAGGTTCTCTTATTCTTCATTTAAGAATACACAGTGGTGAAAAGCCTTATCAGTGTCCCAATTGTGAAAAAAGATATTCTGAAAAGACTAAGCTTACTaaccaccttagaacacatacagga
Scaffold1044:99354-99524	Scaffold1044	99354	99524	WHL22.15917	SPU_003583	ACATGTGTCACAGGCATATTCACCTTTTTACATAACAGCAGTGGAGTGATCTTCCTTTGTCTATTTGTCCGCTTTCTTTGTCCGTCATATTCATAGTGACAGCGAACTGTCCCCCTCTTGACGATTTTGACGACGGAGTCCGCTCTGGAGATTCACCCCCTTTCTACCAC	0	NW_022145615.1:16434371-16434541	NW_022145615.1	16434371	16434541	LOC100889998	0	GTGGTAGAAAGGGGGTGAATCTCCAGAGCGGACTCCGTCGTCAAAATCGTCAAGAGGGGGACAGTTCGctgtcactatgaatatgacggacaaagaaagcggacaaataGACAAAGGAAGATCACTCCACTGCtgttatgtaaaaaggtgaatatgcctGTGACACatgt
Scaffold1045:120449-120850	Scaffold1045	120449	120850	WHL22.16475	SPU_014312	CAAAAAATGTGGTCTTTGTAGACAGGTAGTCTTTGTAGACAGGTGGTCTTTGTAGACAGGTGGTCTTTGTAGACAGGTGGTCACCAAAGCAGGTTTGACTGTAGTTAACTTATCACTTTATCATGACTCCTTCACCTATTCTGTGTACAAAGTGCCCATCCTTTGAGCTACCCCCATGTTTACTTTGTCTCAAAGTGCAGTCATGTGAAACCATCTGTGTACACACCATAGTGACCACTCCCCGCCTTCTTGATTACCATATCAATGGAGGATTGTATTCCCTCTAGGTTTCCTCTGTTTGTACAAATCCTTTGTAAATTCAATTGCCTGTGAGCTAAGCTCTAATTCCTGTGCCTTACTTACTCTGCCTAGATTATATACTGCAGTGTAAGGAGTTAG…	0	NW_022145570.1:4905595-4905996	NW_022145570.1	4905595	4905996	LOC115919102	0	aaCTAACTCCTTACACTGCAGTATATAATCTAGGCAGAGTAAGTAAGGCACAGGAATTAGAGCTTAGCTCACAGGCaattgaatttacaaaggaTTTGTACAAACAGAGGAAACCTAGAGGGAATACAATCCTCCATTGATATGGTAATCAAGAAGGCGGGGAGTGGTCACTATGGTGTGTACACAGATGGTTTCACATGACTGCACTTTGAGACAAAGTAAACATGGGGGTAGCTCAAAGGATGGGCACTTTGTACACAGAATAGGTGAAGGAGTCATGATAAAGTGATAAGttaactacagtcaaacctgctttggtgaccacctgtctacaaagaccacctgtctacaaagaccacctgtctacaaagactacctgtctacaaagaccacattttt…
Scaffold1045:65865-66462	Scaffold1045	65865	66462	WHL22.16080	SPU_002852	ANNNNNNNNNNNNNNNNNNNNNNNNNNNNNNNNNNNNNNNNNNNNNNNNNNCATATACATGTACTAGTATGAGAGCTATGAATGATCTTGCAGAAATTATGAAGGTTATATCAATGTCATACTCAATGACAATAGGCGGCCGCCTCAAACTGGTATCTAGCTACTCACGTCACTGTGCTATTTCGAGGCACATGCCGTTATCTCCTGACGTTGTTCTCTTCGACGACCAATCATAAGCTGTGCTCAAGATTCGCTTCAGCGAGCTAGCTGCGTTTGCAAAAGCTGATGCAATATCGTCAAAGCCTATTTACCCCCTGGAGGAAATATTACCTTCCGCCAATCAATATATTTCTAAGTAGAAAATAAATGTCCCTTAAATTATCCTCTATATTGATGCAG…	0	NW_022145599.1:36272181-36272900	NW_022145599.1	36272181	36272900	LOC586579	0	aatgaatgaagtaaAATGTGGCTAAGGCGCGCCGGAACTTTTACTAATATAAATTATTGCCGACCCAATCACTAAGAATGTGTAAACTATCAATGCGCGAAAGGGAGCCTCTAATTTCTTCTTTGGACGCTATTAATATCCCTCGAAATTAGCCTAATCGCCTGTTATTTTAACCAGAAGATTCATATCGAATGTATTCTGCATCAACATAGAGGATAATTTAAGGAACCTTTATTTTCTACTTAGAAATATATTGATTGGCGGAAGGTAATATTTCCTCCAGGGGGTAAATAGGCTTTGACGATATTGCATCAGCTTTTGCAAACGCAGCTAGCTCGCTGAAGCGAATCTTGAGCACAGCTTATGATTGGTCGTCGAAGAGAACAACGTCAGGAGATA…
Scaffold1045:70470-70831	Scaffold1045	70470	70831	WHL22.16080	SPU_002852	TTACTATTTTAAAAAGTTGGAATAAACAGGATTTTTCTTCTACTTAACCCTTCACATTCTATTTTTGTGTACATGTTTGTATCCTTTAAATTCTTTCTGCCTTCCTCCTTCAGCCCGTCTTTCACTTTTGCTTTTAATAGATCATCTCCAATCTCATATAAGGGTAATTCCAACAATTAGGGACCCACTTTGTGACATTTCTGGTGTCCCACTTAATACACTTAATGGTGAGTGATTTTAGGTACGAGAATGCAATATCACGCTTGGAAATCACTTTACGATCTCATTCCACTATTTAAGTCTTAACTCATGCAGAGCCATAAATACGTGCGGGTTCCTTATATAAGTGGGACGCCAAAAA	1896	NW_022145599.1:36267953-36268314	NW_022145599.1	36267953	36268314	LOC586579	795	tttttggcGTCCCACTTATATAAGGAACCCGCACGTATTTATGGCTCTGCATGAGTTAAGACTTAAATAGTGGAATGAGATCGTAAAGTGATTTCCAAGCGTGATATTGCATTCTCGTACCTAAAATCACTCACCATTAAGTGTATTAAGTGGGACACCAgaaatgtcacaaagtgggtcccTAATTGTTGGAATTACCCTTATATGAGATTGGAGAtgatctattaaaagcaaaagtGAAAGACGGGCTGAAGGAGGAAGGCAGAAAGAATTTAAAGGATACAAACATGTACACAAAAATAGAATGTGAAGGGTTAAGTAGAAGAAAAATCCTGTTTATTCCAACTTTTTAAAATAGTAA
Scaffold1045:74205-74655	Scaffold1045	74205	74655	WHL22.16099	SPU_002853	CCTGAGATAGGCCGGCATGGTCGCCGAATTTATGTTTCGGGAAAATTTGGGTAACCCATTCGGAAAACCACAATCTAACATTTTCAGTATAAAAATATCTAAAAATAGAGATCTATTTAGTTTAATGCGCAATTATTTTGGCACTAAAATACAGTGTATGATTAGCTCATTCGCAAAACTTCAAACTATGGTTTACATTCAGTCGAAACTCGAAAGGCGTCAGCCCCCTGATAGAATCGGGCCTGCCACGCCCATGACTAGAACAAACCACTCCCTGGTTTTTAGAGACCGCTAAGCCTGGCTTCCTCATCAGCTCAACTGATGTGGAACCTTCCAAGCATCAAGTTCAAACATCAACCGCCACATGACCTTGGCTTGGTGGAATACCTTTAGATTAGC…	1080	NW_022145570.1:4941579-4942030	NW_022145570.1	4941579	4942030	LOC115929770	560	GAAGTCTGTCCGTGACGTGATAATATGAAAAGGAAATGAGGTTGTCTGTGAGCTAATCTAAAGGTATTCCACCAAGCCAAGGTCATGTGGCGGTTGATGTTTGAACTCGATGCTTGGAAGGTTCCACATCAGTTGAGCTGATGAGGAAGCCAGGCTTAGCGGTCTCTAAAAACCAGGGAGTGGTTTGTTCTAGTCATGGGCGTGGCAGGCCCGATTCTATTAGGGGGCTGACGCCTTTCGAGTTTCGACTGAATGTAAACCATAGTTTGAAGTTTTGCGAATGAGCTAATCATACACTGTATTTTAGTGCCAAAATAATTGCGCATTAAACTAAATAGATCTctatttttagatatttttatACTGAAAATGTTAGATTGTGGTTTTTCCGAATGGGTT…
Scaffold1045:97849-98167	Scaffold1045	97849	98167	WHL22.16464	SPU_018962	ACCCATATTTTCAGCTATTCAAATGGACAGACTTTAATGTTCACCTGAAATTGTACTTTTATCATTATCTTTCAGGATATGAGAGTGCACAGTGGTGATGACGTTACAAACCAGTCAACAACAGTGTTTCTCGGTATTTACCCTGTCAATTCATTTCCTCTTCTCCATATTAGTGTCTTATTTCCTCTTAGCTAGCACGCAGCTAAGCAGGATTTAAACAAAAATGTACCATCATGTGAATTTATACTGGGGTAGAATAATGAATGACGCACTTCGCATTTTAACAAGTAAACAATTCTGACGTGCATGGTCAACACG	0	NW_022145570.1:4918214-4918344	NW_022145570.1	4918214	4918344	LOC115929758	0	GAAACACTGTTGTTGACTGGTTTGTAACGTCATCACCACTGTGCACTCTCATATCCTgaaagataatgataaaagtaCAATTTCAGGTGAACATTAAAGTCTGTCCATTTGAATAGCTGAAAATATGGGT
Scaffold1045:98331-98829	Scaffold1045	98331	98829	WHL22.16464	SPU_018962	ATACATGTATGCAATGGTGAACAAATTGCCTTTTTGCCGATGTCATCCTATCTGAATGTCACTAGTAAGTCAAACACGACCTACTATTGTGACGTCACGGACACACCCTCCATATACCTCCGCAATTGGCCAATCAGAACATCGCTCGCCCGATGGTAGACCGCAATGTTTGGAATGGAAATGTACGACACTGCGGGCGACGAAAAACTAGACAAACACCCAGTCGCAAAAAAATGTATGAATACCCATCACAAGTATACATACAAAATGGAACTTGTAAGAGGAGTTTACCGTTTATTGTGTTCGTTTCAATTAACATTCCCCCTTTTGATCGAAGCTCATTGATTTTGTTGGGATTTACCACGTCTACGATTGCATCATCACATGTATGCACAAAGG…	0	NW_022145570.1:4917255-4917761	NW_022145570.1	4917255	4917761	LOC115929758	0	ACTACAATTCAGCACCACGAACATGTTTCCATACCCTACATGTGTTTTTGCACGTAAATCGCATTATCATAGAGTAGCTTGTACTTGACTGCACGTTCTCCTTTGTGCATACATGTGATGATGCAATCGTAGACGTGGTAAATCCCAACAAAATCAATGAGCTTCGATCAAAAGGGGGAATGTTAATTGAAACGAACACAATAAACGGTAAACTCCTCTTACAAGTTCCATTTTGTATGTATACTTGTGATGggtattcatacatttttttgcGACTGGGTACATGGGTGTTTGTCTAGTTTTTCGTCGCCCGCAGTGTCGTACATTTCCATTCCAAACATTGCGGTCTACCATCGGGCGAGCGATGTTCTGATTGGCCAATTGCGGAGGTATATGGAG…
Scaffold1046:171997-172397	Scaffold1046	171997	172397	WHL22.16752	SPU_001284	TGCCGTTTCCGCTCCTTTACCTGTGTTTGTTTACGAGGACAGAATGCCTTGTTGCTTCTGGATCCAAACAAGTTATTCAGTTAGTCACGGCTTCACTTTAATCTCTCTCCCTATTTCGCACTCATTGTCTATAGTGTTTTACTTATGAATTTAAATACTAATTATTTTGTTAAATCACATAAGGTCAACAATCTGTGGATGAGATTTTTTTTAAAAACACCCCTGTATAAAAGACTACACCTTTCCCTTTTAAGCATATTTTATCATATTTTGTTATATTGGCATCCAAAAATTGGATCATTTACAAGGGCTACTTCCTCTTGTCCTCATATGATCTTCTCATTTTTATCCCTATAATTGAATAATATTATTAAAATATTTACATGTGTGATGATAAATA	0	NW_022145601.1:8846966-8847349	NW_022145601.1	8846966	8847349	LOC576875	0	TACCATTTCCACTCCTTTACCTGTGTTTGTTTACGAGGTCAGAACGCCTTGTTGCATCTTCCAAACAAGTTATTCAGTTAGTCACTCCTGCACTTTAATCTCTCTCCCTATTTTGCACTCATTTTCTTTAGTGTTTTACAAATactaattattttgttgaatcAGATTTATAGGTCAACAGTCAGTggatgagatttaaaaaaaaacacctctgaATAAGACTacacattttccttttaagcatattttatcataatttgttatattaccATCCAAAAATTTGATCATTTACAAGGGCTTCTTCCTCTTGTCCTCATATGATCTCCTCATTTTTATCCCtataattgaatataaaaataaaatatttacatgtgtGATAAATA
Scaffold1046:172785-172932	Scaffold1046	172785	172932	WHL22.16752	SPU_001284	CCCTCTCTTCTTTTCTCCCTTTCTCCCTCCCATCCTTCCTCCTTCATCCACTCCATCCATCTCTCTCTCTACATCAAAAGTTTCCATCTAACAGCAACTCTTCTTGTGTAGTTTTACTTGTTTTTCATGCTCCATCCATCCATAATG	0	NW_022145601.1:8847731-8847875	NW_022145601.1	8847731	8847875	LOC576875	0	ccctctcttcttctctcccttcctccctcacATCCTTCCTCCTTCATCcactccctccatctctctctacaTCAAAAGCTTTCTATCTAACAGCAACTCTTCTTGCAGTTTTACTTGCTTTTCATGCTCCATCCATCCATAATG
Scaffold1046:190254-190397	Scaffold1046	190254	190397	WHL22.16752	SPU_001284	CCCTCCCTCCCCCCCCCCCCCTCAACTTTCCCTCTCTATTTTCCTGTCCTTATGGATATATCTCTCTCTCTATCTCTCCATTTCATTTCAATATTTCCTAAAGTGTTGCCAGATTTGTACAGCTGATGATTCCTATACACAAT	0	NW_022145601.1:8864158-8864301	NW_022145601.1	8864158	8864301	LOC576875	0	ccctccctccccccccccccctcaactttCCCTCTCTATTTTCCTGTCCTTATggatatatctctctctctatctctccatttcatttcaatatttccTAAAGTGTTGCCAGATTTGTACAGCTGATGACTCctatacacaat
Scaffold1046:190503-191002	Scaffold1046	190503	191002	WHL22.16752	SPU_001284	CCCTCTTTCTTCCCCCCCCCCCTCTCTCTCTCTCTCTCTCTCTCCCTCTTGTCTCTCTATCTCAAACAATTTGTATTTGTGTGTATCCAGCCATTTTCTGTGTTTCTCTCTTTAAGTATTCACACTTGCACACACCCTTTCCCCCTTCTCTTTTTCTCTTCCTTCACCTATCTCCTCTCTGCCTGAATATTCCTCCTCCTACTTCTCCCTCCTTCTCCCCCTCATTCTCCCCCTCCCCCCCCCCCCCCATATCCCTCCCACTCCTCTCTATCTCTCTCTCTCTCTCTCTCACTTTCTGTGTCTTTTCTCTATCTCCTCTCTGCCCAGTGCCCACGTCATATCCTTCTCCTCCCACTTAACTTCCCTCCCTCTCTCCCCTCTCTCCCCCTCTCCCCCTCT…	0	NW_022145601.1:8864407-8864909	NW_022145601.1	8864407	8864909	LOC576875	0	ccctctttcttccccccccccctctctctctctctctctctctccctcttgtctctctatctcaaacaatttgtatttgtgtgtatCCAGCCATTTTCTGTGTTTCTCTCTTTAAGTATTCACACTTGCACACaccctttcccccttctctttttctcttccttcacCTATCTCCTCTCTGCCTGAATATTCCTCCTCCTacttctccctccttctccccctcattctccccctcccccccccccccccccatatcccTCCcactcctctctatctctctctctctctctctcactttctgtgTCTTTTCTCTATCTCCTCTCTGCCCAGTGCCCACGTCATATCCTTCTCCTCCCACTTaacttccctccctctctcccctctctccccctctccccc…
Scaffold1046:19637-19909	Scaffold1046	19637	19909	WHL22.16147	SPU_025123	GCGCGTGGGCTCCCACTGTTTTGTCCTTTATATCCCACAAAAGGGCAGAAACCAACAATGAGAATGACCACATTAAGGTGGCTAGGCTCAAAAGTGGGATTTTCCCCAAATATTGATAATAATAACTATGACGTATATGCTTTCATTTCCTTGCCGCTAATTTCACATTCTCACGCACGCCTACAAAGTAACACTCATAAAATTGTATTCACGGTGCGGAAAGCACCAGTCAAGCGAAGTTAGAATCTTCGATTTCCTTAATTTAACGTTCG	16514	N/A	N/A	N/A	N/A	N/A	N/A	N/A
Scaffold1046:282397-282518	Scaffold1046	282397	282518	WHL22.16217	SPU_016983	CGAGCGATTCTGTCAACAAACACCTTCTATAATATTGAATAGTCAAATAGCTGAAGCTGGTCACGAAAACAACCAAGATGCCCATTGAAGTAAGGTTCCTGTGTTAATTAGGAAAAAGGAG	44768	NW_022145602.1:29123752-29123873	NW_022145602.1	29123752	29123873	LOC115925067	0	ctCCTTTTTCCTAATTAACACAGGAACCTTACTTCAATGGGCATCTTGGTTGTTTTCGTGACCAGCTTCAGCTATTTGACTATTCAATATTATAGAAGGTGTTTGTTGACAGAATCGCTCG
Scaffold1047:117859-118053	Scaffold1047	117859	118053	WHL22.17652	SPU_000102	TTGGGTCTTTACTTACAAACTAGTGGGTAACACATGTCTAGTTGGTGTATTTCTATAACTGGAATGATTACTCATATCAAGACAGAAATACACTACCTACGAATGGGGTTAATAGTCTTATGATTCATACATTGTGGGTACCTCCTCCATACGTCAGTCGGACTTGGGGCGTTTGGGTGCGAGCTGACATAGGC	0	NW_022145614.1:29812752-29812946	NW_022145614.1	29812752	29812946	LOC580566	0	GCCTATGTCAGCTCGCACCCAAACGCCCCAAGTCCGACTGACGTATGGAGGAGGTACCCACAATGTATGAATCATAAGACTATTAACCCCATTCGTAGGTAGTGTATTTCTGTCTTGATATGAGTAATCATTCCAGTTATAGAAATACACCAACTAGACATGTGTTACCCACTAGTTTGTAAGTAAAGACCCAA
Scaffold1047:200803-201058	Scaffold1047	200803	201058	WHL22.17668	N/A	CAAAGAAAAAGAAGGAGGAGGAGGAGAAGAAGAAGAAAAAGAGAATAGACCCTCTAGAACTTAGAATTAGAACTAGGTCTAGTCTATTAGAAGATGAAGAAGGTCGAAGAAAGAAGAAGAGAGAATGAAAAAAAAAAAGAAGAAGAAAACAAATGGAAGGAAATGGTAAAATTTATTCTATTAAACAACAACAGGAAAAAAACATAATTCGTCACCGGCAAAGGTGTACAAAATACTGAACATGGTTATTAACGA	0	NW_022145614.1:29761265-29761519	NW_022145614.1	29761265	29761519	LOC105437418	0	TCGTTAATAACCATGTTCAGTATTTTGTACACCTTTGCCGGTGACgaattatgtttttttcctgTTGTTGTTTAATAGAATAAATTTTACCATTTCCttccatttgttttcttcttcttttttttttcattctctcttcttctttcttcgaccttcttcatcttctaatAGACTAGACCTAGTTCTAATTCTAAGTTCTAGAGGgtctattctctttttcttcttcttctcctcctcctccttctttttctttg
Scaffold1047:201147-201639	Scaffold1047	201147	201639	WHL22.17668	N/A	ACGACGCACTGGTACTGAATCCACAGATTGACACATTTCGTAAGTTTGCGGCTCCATAAGCAAACCTTGGTGTAAAAAAATGCCGACCATGTAACACCAAATTCCACAAGGGCGCTGCCATTTTGATTTATTTAGTCTTTATCTAGATAATTGTTTTATTTTCTTCCATCCCACCAACTTTCGACTTGATATTTGATTAAAAAAAGATATATTATTATGACCTAAATACAACTATAAACTATAGATTAGGCTCAAATGATATATGTTAAAGCAAAAGTTTTAAAAAAGTGCCTCTGTAGGAAATTGGCATATTGAATATTTTAGTATCAGCACCCACATAGACTCGAACTAAGACTGTGTGTAGTCTGCTTGAGCAGTCTACGCCGACCATGTGCATGG…	0	NW_022145614.1:29760684-29761176	NW_022145614.1	29760684	29761176	LOC580272	0	ACTTCCTGGCCCTGTCGTAGCTATACACCCAAAAGACGTAGCACTAGCACTCTTACCCGAAAGCTCAGGCGTGCGGACAACAGCATTGCCGTACCATGCACATGGTCGGCGTAGACTGCTCAAGCAGACTACACACAGTCTTAGTTCGAGTCTATGTGGGTGCTGATACTAAAATATTCAATATGCCAATTTCCTACAGAGgcacttttttaaaacttttgctTTAACATATATCATTTGAGCCTAATCTATAGTTTATAGTTGTATTTAGGtcataataatatatctttttttaatcaaatatcaAGTCGAAAGTTGGTGggatggaagaaaataaaacaattatctaGATAAAgactaaataaatcaaaatggcaGCGCCCTTGTGGAATTTGGTGT…
Scaffold1047:246422-246686	Scaffold1047	246422	246686	WHL22.16695	SPU_020796	ATCTGACCCTATTGGAACCTGTGCCAGTCTAGAAGATCTAGTCTCCATACATAAACCTGCTAAAATGAAGGATCATGAATCGGTTCCCGCAAATCAAAACAGGATAAGACTGTGACTTGCGCTAGCCCCTTGGTGCCGATCACAAGTTCCTTACTCCACTCGTGACACACACACGCTGCTTTGATCAAAAACAATTACGTGACTCATGTCCCGATAAACCCTCATTCTGCAATGGCCTGACCAAACAGGGCTCTCTGTGTGTAG	0	NW_022145614.1:29715671-29715935	NW_022145614.1	29715671	29715935	LOC100891932	0	CTACACACAGAGAGCCCTGTTTGGTCAGGCCATTGCAGAATGAGGGTTTATCGGGACATGAGTCACGTAATTGTTTTTGATCAAAGCAGCGTGTGTGTGTCACGAGTGGAGTAAGGAACTTGTGATCGGCACCAAGGGGCTAGCGCAAGTCACAGTCTTATCCTGTTTTGATTTGCGGGAACCGATTCATGATCCTTCATTTTAGCAGGTTTATGTATGGAGACTAGATCTTCTAGACTGGCACAGGTTCCAATAGGGTCAGAT
Scaffold1047:262568-262600	Scaffold1047	262568	262600	WHL22.16695	SPU_020796	CTCCTGTTACTTCCTGCACGTCACTTAGGCTT	0	NW_022145614.1:29700232-29700264	NW_022145614.1	29700232	29700264	LOC100891932	0	AAGCCTAAGTGACGTGCAGGAAGTAACAGGAG
Scaffold1047:315375-315757	Scaffold1047	315375	315757	WHL22.16695	SPU_020796	GATGTGTAGCATAAACATACTCCCAATAGACTGTCCGGTTTATGAATCATAACCATAACCATTAGTGCATCAAACTTCTATGCATTTAAAACTCGCAGCTTCAGAGGAAAGGGTGTTGATACACGCAATAGTGGTCTGCAGAACAATGACACCTAACGCTTTTAATGGGGAGGAAATTTGACAATTAACGATTACCGGTCGTTAGCGTTAAAGAAACCAATTGCGAGGCCCCGCCGTTTGTTCACTCCTTAAAGATTTAAGTTTTTAACATGGCTGTTCCAGGAGTTAAAAAATACACTATTCCCCTAATTTGTGGATGTAGTATATAGATCGTGTCACAAATTGTCACAGTTTGCTAAATGAATGTACAGTCTTCACGGTT	9548	NW_022145614.1:29654942-29655324	NW_022145614.1	29654942	29655324	LOC115920370	0	AACCGTGAAGACTGTACATTCATTTAGCAAACTGTGACAATTTGTGACACGATCTATATACTACATCCACAAATTAGGGGAATAGTGTATTTTTTAACTCCTGGAACAGCCATGTTAAAAACTTAAATCTTTAAGGAGTGAACAAACGGCGGGGCCTCGCAATTGGTTTCTTTAACGCTAACGACCGGTAATCGTTAATTGTCAAATTTCCTCCCCATTAAAAGCGTTAGGTGTCATTGTTCTGCAGACCACTATTGCGTGTATCAACACCCTTTCCTCTGAAGCTGCGAGTTTTAAATGCATAGAAGTTTGATGCACTAATGGTTATGGTTATGATTCATAAACCGGACAGTCTATTGGGAGTATGTTTATGCTACACATC
Scaffold1047:83489-83880	Scaffold1047	83489	83880	WHL22.17652	SPU_000102	ACATGTACATATAATACAAGTTATCAAATAAAAAGTCATAAAACCTCACAAATGCACATGTACATATGTACTGGCTGTGTAGCCTGCATACGTGAAGGTTGTACTTGCACTCCCCATAAAACCCACATTCTACAGGGTACAGAACGGCCTATCCCCGTCTTCACAGTACACAAGCATGGCTCTGCCCACTAAGTTACTGCCCACACTCTACAACGTGCTCTGTTTGTGTTGCTATTAGACAGGACGATCTATAAATGGGACATCCTTTGATCTGTCGTTTGTTCCTTCTCTGACAGGGCGCAAATAAATGATTACATAATAGCATGCATCTAACTGTCCATGGCCTATTAAAACCCTTGCCAACAATGTGGTGTACAGTATACCTGGGAAT	0	NW_022145614.1:29849009-29849400	NW_022145614.1	29849009	29849400	LOC115920304	653	ATTCCCAGGTATACTGTACACCACATTGTTGGCAAGGGTTTTAATAGGCCATGGACAGTTAGATGCATGCTATTATGTAATCATTTATTTGCGCCCTGTCAGAGAAGGAACAAACGACAGATCAAAGGATGTCCCATTTATAGATCGTCCTGTCTAATAGCAACACAAACAGAGCACGTTGTAGAGTGTGGGCAGTAACTTAGTGGGCAGAGCCATGCTTGTGTACTGTGAAGACGGGGATAGGCCGTTCTGTACCCTGTAGAATGTGGGTTTTATGGGGAGTGCAAGTACAACCTTCACGTATGCAGGCTACACAGCcagtacatatgtacatgtgcatttgtgaggttttatgactttttatttgataacttgtattatatgtacatgt
Scaffold1048:61300-61541	Scaffold1048	61300	61541	WHL22.17057	SPU_013946	CAGAGCCAGTGGCATGGTTGAGTAAGCTGACTGTACAAAGATAGACGGTCTGGTTGTTTGAAGGTGCGTGCATGCGGCCAATGGAAGTTGCATGCACAAGCAGACTGGTATAGACGTCTGAAAGGTGCATGAAACAAACTGGTGCGGCCAATTGGAGTTGCATGCACAAGCAGACTAGTATAGACGTTTGAAAGGTGCAGAAGCGGACTGGTTTAGTCGGCTGGTGGTACACGACGGTACA	8624	NW_022145594.1:23307815-23307999	NW_022145594.1	23307815	23307999	LOC115921287	9541	TGTACCGTCGTGTACCACCAGCCGACTAAACCAGTCCGCTTCTGCACCTTTCAGACGTCTATACCAGTCTGCTTGTGCATGCAACTTCCATTGGCCGCACCAGTTTGCTTCATGCATGCACCTTCAAACAACCAGACCGTCTGTCTTTGTACAGTCAGCTTACTCGACCATGCCACTGGCTCTG
Scaffold1048:68238-68388	Scaffold1048	68238	68388	WHL22.17057	SPU_013946	CTCCAGGGTATATTTTATCGAAAATGTAGTGTTACTGTTACCATGACAGCGGTAGATCCAGGATTTACGAAAAGGAGGGGAGTTGGGCGTAACCCAAAGAGCATAAGCGTGACTCCTTCGGGGTAGGGTCCAAGGTCCTGTCCTGTTACT	1777	NW_022145607.1:33707139-33780959	NW_022145607.1	33707139	33780959	VEB4	0	GAGGTTCCTGATTACAATGGTCCATGGAAAGTGAATCGAATGTGCCTCGAGAACGTTGTTCAAATTGCTATCAACATAATAATCGAAAGCAGTGATGTATTTTGTGACCTGAATTCCTGctcgaaatgaaatgaattcgTTAGCAACAGTCTTCAACTCGAACACAATTGGCTTTGAAGATACCTTTTATGATGTATTGATGTTATGACGTAACAATGGAGAAGGAGGATATACCATCAAACAAAAGATCCATTCATGATAATGCTCTTTCAGTTCACCTCGTTGTTTTATAATGTAGAGTTCTttggagcgaatacaaaaggATGTTTGCTCTAAAAGAAAGAACAGGATATATGGCAGAATTTCACGCTCGTGATTTAGGAGAGAACAAAAGATTGA…
Scaffold1048:70522-70974	Scaffold1048	70522	70974	WHL22.17057	SPU_013946	CACTGGTTAAAAGAGCTATAGAATTATTTTGAATTAAAACACCCCTTGGAATGTCAATCTTTTGTTCTCTCCTAAATCACAAGCGTGAATCCTGCCACATATCCTGTTCTTTCTTTTAGAGCAAACTTCCTTTTGTATTCGCTCCAAAGAACTCTTCATTATCAAACAGCGAGGTGAACTGAAAAGAGCATTATCATGAATGGATCTTTTGTTTGATGGTATATACTCCTTCTCCATCGTTACGTCATAACATCAATACATCATAAAAGGTATCTTCAAAGCCAATTGTGTTCGAGTTGAAGACTGTTGCTAACGAATTTATCTCATTTCGAGCAGGAATTCAGGTCACAAAATACATCACTGCTTTCGATTATTATGTTGATAGCATTTTGAACAAAG…	0	NW_022145607.1:33707139-33780959	NW_022145607.1	33707139	33780959	VEB4	0	GAGGTTCCTGATTACAATGGTCCATGGAAAGTGAATCGAATGTGCCTCGAGAACGTTGTTCAAATTGCTATCAACATAATAATCGAAAGCAGTGATGTATTTTGTGACCTGAATTCCTGctcgaaatgaaatgaattcgTTAGCAACAGTCTTCAACTCGAACACAATTGGCTTTGAAGATACCTTTTATGATGTATTGATGTTATGACGTAACAATGGAGAAGGAGGATATACCATCAAACAAAAGATCCATTCATGATAATGCTCTTTCAGTTCACCTCGTTGTTTTATAATGTAGAGTTCTttggagcgaatacaaaaggATGTTTGCTCTAAAAGAAAGAACAGGATATATGGCAGAATTTCACGCTCGTGATTTAGGAGAGAACAAAAGATTGA…
Scaffold1048:75163-75207	Scaffold1048	75163	75207	WHL22.17059	SPU_013946	GAACTAAGAAGTCCGGGGTGAGAATGTTTTCTATTCGTATTGTC	756	NW_022145607.1:33600876-33600920	NW_022145607.1	33600876	33600920	LOC115928029	788	GACAATACGAATAGAAAACATTCTCACCCCGGACTTCTTAGTTC
Scaffold1049:142885-143348	Scaffold1049	142885	143348	WHL22.17771	SPU_028909	GGGATTAGAATCTACCACCTGATCAATAATTCAAAATAACTTGCCGGTTCTCTACAGAGTACACACTCCAAGAACGCAACCATTATTGATTGGTATAACCATGATGACGTCATCTACACTTGGATAACAATAGAAGGAAGCGATCAATAAGCGATCACTATACAATGCAATGGACAGCCAGATAATCCTGCTGGCATTTTGACAAAAAAGAATTGAAGAAAGTAAAGAAGAACCCATTCATTCTTCCACTTTGAATGTCCCTCGTAGTAAACTGAACTCTTAAATGAAAAAAATGTGGTATCTGCTGTTGTTTTCATGAGTATTTTATTTTCAAGATCCTCTATACAATGCCAGGGACAGCCTGACAGTCTTGCTGGCATTTTGACACAAAAGAATAGA…	45219	NW_022145602.1:27389854-27390317	NW_022145602.1	27389854	27390317	LOC589178	23806	AGTTTACTATGAGGGACACGCAAAATGGAAGCTAGCTCTCAATGAATTCCtacttttctttacttctaTTCTTTTGTGTCAAAATGCCAGCAAGACTGTCAGGCTGTCCCTGGCATTGTATAGAGgatcttgaaaataaaatactcATGAAAACAACAGCAGATaccacatttttttcatttaagagTTCAGTTTACTACGAGGGACATTCAAAGTGGAAGAATGAATGGGTTCTTCTTTACTTTCTTCAATTCTTTTTTGTCAAAATGCCAGCAGGATTATCTGGCTGTCCATTGCATTGTATAGTGATCGCTTATTGATCGCTTCCTTCTATTGTTATCCAAGtgtagatgacgtcatcatggttaTACCAATCAATAATGGTTGCGTTCTTGGAGT…
Scaffold105:10991-11198	Scaffold105	10991	11198	WHL22.18108	SPU_017282	CACTCATGTCACTTAACCCCATCAACCGTTTTGTTCACCTCACGTTGCTACCCCCCCCCCCCTCCCTCCACCCCATCCCCCTTTCCGACCATGCATTAGTGCCTGCTCTCTTCACCTATTTCGTATGCATTCTGCGCTACCGTCAAGAGTATCTTTGCGAACTCGCCAAAATGTGCGCGTTCATAGAGATGCAGATAATAATTACAT	76791	NW_022145596.1:7214109-7214322	NW_022145596.1	7214109	7214322	LOC105438659	214	ATGTAATTATTATCTGCATCTCTATGAACGCGCACATTTTGGCGAGTTCGCAAAGATACTCTTGACGGTAGCGCAGAATGCATACGAAATAGGTGAAGAGAGCAGGCACTAATGCATGGTCGGAAAGGGGGgtagggtggaggggggggggggggggggggggtagcaacgTGAGGTGAACAAAACGGTTGATGGGGTTAAGTGACATGAGTG
Scaffold105:129064-129230	Scaffold105	129064	129230	WHL22.18108	SPU_017282	ACATTTTTTATTCCATCATTCTATTTGTCAATAAGAATTAATTCAATTATAATGTAGTCTCTAAATTGGCAACGTGATGCGAGGAAAAAAATCTAGACTTTGAGAAAAGTTTGTATTCTAATTGTATAATAATGTTCCTTGTATAATAATGTTCCTTGTATTTGTA	0	NW_022145596.1:7091159-7091325	NW_022145596.1	7091159	7091325	LOC587791	0	TACAAATACAAGGAACATTATTATACAAGGAACATTATTATACAATTAGAATACAAACTTTTCTCAAAGTCTAGATTTTTTTCCTCGCATcacgttgccaatttagagactacattataattgaattaattCTTATTGACAAATAGAATGATGGAATAAAAAATGT
Scaffold105:15810-15948	Scaffold105	15810	15948	WHL22.18108	SPU_017282	GTCGTGGTGTACTCTTTGGTGGCGCTGTCCATTGAGCGCTACCAGAAAATCGCCGATCCATTCAACCGTTGCGGAGAAACTTGCTGCTCGGGTTCTTTTCGAAGATGTTCAATACACTCAAATGGATTGATTATCGCT	72041	NW_022145596.1:7210129-7210267	NW_022145596.1	7210129	7210267	LOC105438659	0	AGCGATAATCAATCCATTTGAGTGTATTGAACATCTTCGAAAAGCACCCGAGCAGCAAGTTTCTCCGCAACGGTTGAATGGATCGGCGATTTTCTGGTAGCGCTCAATGGACAGCGCCACCAACGAGTACACCACGAC
Scaffold105:195350-195536	Scaffold105	195350	195536	WHL22.17632	SPU_020300	ATAAAAAGACTTGAAAAATCAACTGAAGGCAATTTCAATAGCCTTGTCCATTACGTTTGGAAACATGTAAACATTACAGTGAGGTATTGCATAATCCCAATATGATTTCTATAGGATGCACAATAGTGCTTTGAAATTGCCTTCAGTTAATTTTCAAAGCCTTTGTGATTTGTTGTTCCCTGAGAG	0	NW_022145596.1:4664728-4664914	NW_022145596.1	4664728	4664914	LOC115922164	0	CTCTCAGGGAACAACAAATCACAAAGGCTTTGAAAATTAACTGAAGGCAATTTCAAAGCACTATTGTGCATCCTATAGAAATCATATTGGGATTATGCAATACCTCACTGTAATGTTTACATGTTTCCAAACGTAatggacaaggctattgaaattgccttcaGTTGATTTTTCAAGTCTTTTTAT
Scaffold105:257164-257486	Scaffold105	257164	257486	WHL22.17844	SPU_008314	GGGATCCTATTCAAGCGTCGCGCAAGATTACGCAATAGTGTTTACAGTAACACCTAACCAGCTGAAAATAAATGGATAACTAGTCTCAGATCCAACGTTGCACGTTTACATTACAATTATTTTCCATTTTTTATTAAAGGAATATTGTAAAAAAGCTCAAAATTATATATTTTTACAGGATCATATTAAATATTTATAGGTAATTAGCATTTATTTATTTGCAAAATATTGTATAATGTCAGGATAAAATGTTTTGGGATTACCATACCGATGATAAATTACAGAGGCTTGGGCAGTACTGTAGTGTCATCAGTGATGTTAA	13	NW_022145596.1:6969394-6969716	NW_022145596.1	6969394	6969716	LOC115922359	0	TTAACATCACTGATGACACTACAGTACTGCCCAAGCCTCTGTAATTTATCATCGGTATGGTAATCCCAAAACATTTTATCCTGacattatacaatattttgcaaataaataaatgctaaTTACctataaatatttaatatgatcctgtaaaaatatataattttgagcttttttacaatattcctttaataaaaaatggaaaataattgtaatgtaAACGTGCAACGTTGGATCTGAGACTAGTTATCCATTTATTTTCAGCTGGTTAGGTGTTACTGTAAACACTATTGCGTAATCTTGCGCGACGCTTGAATAGGATCCC
Scaffold105:267527-267704	Scaffold105	267527	267704	WHL22.17844	SPU_008314	GGGACCGGGTCGGAAGAACGTCATTGTCCTTTCTTTCAAAGAGAGTGTAGAACAGTGGTGATGAAGAATGGTGGAGAATAGATCACCATGACAATGCTATATACGGTTGAAGGATTCGTTGTGAGAGGAAAGCAGTCAAACAAGTCGCGATACACGAACTTTCGTGAAACAAAAGCA	1932	NW_022145596.1:6961637-6961814	NW_022145596.1	6961637	6961814	LOC115922359	1161	TGCTTTTGTTTCACGAAAGTTCGTGTATCGCGACTTGTTTGACTGCTTTCCTCTCACAACGAATCCTTCAACCGTATATAGCATTGTCATGGTGATCTATTCTCCACCATTCTTCATCACCACTGTTCTACACTCTCTTTGAAAGAAAGGACAATGACGTTCTTCCGACCCGGTCCC
Scaffold105:341985-342319	Scaffold105	341985	342319	WHL22.17762	SPU_025418	CCTGTAGATGGAGTGACAGTGAGAGAGGGGGAGAGGGGAGGGACAGAGAGAGAGAGAGAGAGAGAGAGGGGGGGGGGTGGATGAAAGAGGGATGATATAGATAGATACAGAGAGAGAGAGAGTGATAGAGAAAGGGAGAGAGAGAGAGAGAGAGAGTGATAGAGAAAGGGAGAGAGAGAGGGGGAGTGATAGAGAGAGAGAGAGAGAGAGAGAGGGATGAAGTGATAGAGAGGGGTAGAGGGGGAGATGGAGGAAGAGAGAAAAGGAAGGTGGATGACAGAGGGAGAATGAGAGAAAGAAAGAGAGAGGGATGATGGAGAGAGAGAGAGAGAGA	0	NW_022145610.1:15312799-15313133	NW_022145610.1	15312799	15313133	LOC582197	0	CCTGTAGATGGAGTGacagtgagagagggggagaggggagggacagagagagagagagagagagagaggggggggggtggatgaaaGAGGGATGATATagatagatacagagagagagagagtgatagagaaagggagagagagagagagagagagtgatagagaaagggagagagagagggggagtgatagagagagagagagagagagagagggatgaagtgatagagaggggtagagggggagatggaggaagagagaaaaggaaggtgGATGAcagagggagaatgagagaaagaaagagagagggatgatggagagagagagagagaga
Scaffold105:356985-357149	Scaffold105	356985	357149	WHL22.17762	SPU_025418	GCCTGATGACTTCTTCCTGACTAACACTGCTCACACTCACATCATCCTTCATCTGCTCAGCTGTAAGAAATCATATTAAATCTTGTCAGAATCAATTAAAACTAGATAGCAAATTGTTACAACATTGTATACTGAATGTTATTACTGGTTTTATAAACATGAAT	0	NW_022145539.1:1503539-1503703	NW_022145539.1	1503539	1503703	LOC115923484	0	ATTCATGTTTATAAAACCAGTAATAACATTCAGTATACAATGTTGTAACAATTTGCTATCTAGTTTTAATTGATTCTGACAAGATTTAATATGATTTCTTACAGCTGAGCAGATGAAGGATGATGTGAGTGTGAGCAGTGTTAGTCAGGAAGAAGTCATCAGGC
Scaffold105:36697-36811	Scaffold105	36697	36811	WHL22.18108	SPU_017282	GACGTACTACGAACGGAATTGCTGAACGGGGTGGTCGGGTTACAAACTAGTTAGAACACGTTTCGAACTAGTTAGCACGAGTTTGGCCAATTGGGAACGAGGTAGAACTTGTTA	51178	NW_022145596.1:7170315-7170429	NW_022145596.1	7170315	7170429	LOC115922190	19285	TAACAagttctacctcgttcccaatTGGCCAAACTCGTGCTAACTAGTTCGAAACGTGTTCTAACTAGTTTGTAACCCGACCACCCCGTTCAGCAATTCCGTTCGTAGTACGTC
Scaffold105:478043-478374	Scaffold105	478043	478374	WHL22.17913	SPU_013582	GAATCCGCCATGCGTGGAATTCTACAGTGATTATTATATAGGCTGATCAAATATCACCTTATCGCCGTATGAGTCATGCCGTCGATGATTACAAATTTCCACGTCCACACCAATTTCGCTTTTTAGTTCTATATTCCGCTCATGACTATTTACAATACTCACTGTTATTGATTTGATCAAATTACTTCCGTATCTATTATTTTGAGCAAATTATTATATGTGAGGCTTTTCTGTGGAATCTATTGTTATTGCAAATCAAAGCAGCTATTGTTATGGTCTAATAAGATATTTAAATTTCTATAAAAAAAAGACTCTGTATAAGACTAGCTTG	704	NW_022145610.1:15450097-15450435	NW_022145610.1	15450097	15450435	LOC115919020	1027	GAATCCGCCACTTTGTGGAATTCTACCGTGATTATTAAAGAGGCTGATCAAATATCACCTTATCGCCGTATGAGTCATCACCGTCGATGATTACAAATTTCCACGTCCACACCAATATCGCTTTTTAGTTCTATATTCCGCTCGTGACTATTTACAATACTCACTGTTATTGATTTGATCAAATTACTTCCGTATCTATTACTTTGAGCAAATTATTATATGTGAGGCTTTTCTGTGGAATCTATTGTTATTGCAAATCAAAGCAGCTATTGTTATGGTCTAATAAGATATTtaaatttctataaaaaaaaagactctGTATAAGACTAGCttggtag
Scaffold105:486863-487200	Scaffold105	486863	487200	WHL22.17913	SPU_013582	CGAGCATAATATCAAATGTAGGAAAATTGGGCGATTTTTCTGCGGGTGATTAAAAGAATTATAACTCCCAATTTATAACATCCTGCCGAGGCAGGAAGTGTACAATAATTCTTTGATTCGTGGTTGAATTGTTTGACTTGATCCCCTCCTGTTTTTTTCCCACGCTTCCTGTCCTCATAATGAATGATATTGTTATAAGCAAAGCAAAAAATATAATAACAAAAAATATATAACTTTGTTGCTCCCCACGGTGGAGTATACGAATGACAATTTATTTTTCAGGTATGTTTATTGCTTTACATAATTTACAAGAACACCCATTCAGTTTTCTTTCGGC	5022	NW_022145610.1:15458808-15459145	NW_022145610.1	15458808	15459145	LOC115919020	6526	CGAGCATAATATCAAATGTAGGAAAATTGGGCGATTTTTCTGCGGGTGATTAAAAGAATTATAACTCCCAATTTATAACATCCTGCCGAGGCAGGAAGTGTACAATAATTCTTTGATTCGTGGTTGAATTGTTTGACTTGATCCCCTCCTGTTTTTTTCCCACGCTTCCTGTCCTCATAATGAATGATATTGTTATAAGCAaagcaaaaaatataataacaaaaaatatataactttgtTGCTCCCCACGGTGGAGTATACGaatgacaatttatttttcaggtATGTTTATTGCTTTACATAATTTACAAGAACACCCATTCAGTTTTCTTTCGGC
Scaffold105:487335-487594	Scaffold105	487335	487594	WHL22.17913	SPU_013582	AATTATATTTTGTATTATTGTCTGGCGAATTCGGTCTGACAACCTCTCCCCCATAAAAACAGTTACTGTCATGATGTCCTCTGTAACATGTCTTCGTGTTCTTTAGACATCCCACTATTGACAAAACCGAAAAAGCTCGAATCCCTGTTTTATTTGAGAGGGAACAAAATCGATTAGTTTGTCATTATATGAAGGAGTACCACAACTTGAGAGAGAGAAAAAAAAAAACCTTCGTCTATTTTGAGTAATATTTGAGTTA	5494	NW_022145610.1:15459280-15459539	NW_022145610.1	15459280	15459539	LOC115919020	6998	aattatattttgtattattgtctGGCGAATTCGGTCTGACAACCTCTCCCCCATAAAAACAGTTACTGTCATGATGTCCTCTGTAACATGTCTTCGTGTTCTTTAGACATCCCACTATTGACAAAACCGAAAAAGCTCGAATCCCTGTTTTATTTGAGAGGGAACAAAATCGATTAGTTTGTCATTATATGAAGGAGTACcacaacttgagagagagaaaaaaaaaaaccttcgtCTATTTTGAGTAATATTTGAGTTA
Scaffold105:489633-490094	Scaffold105	489633	490094	WHL22.17913	SPU_013582	CTCTCTCCCATCCACAATGTACAGACCATTGCCCATTGGACTTGCACGCAATTCGAGTTATTGATTGATTTTCTTTCATCGTGTTCGAACGGGTTCAAGTTGGGTGCACACGGCGTCCCCCTCTCTATTTATAGACATCGTAAGCTCTACTTCTAGACAATGGTTGCCATAGAAACTCAGATTACCAATTGTTGACATTGTCGAGTCCCTTTACGATGATTCAGATCTTAACAATGGGTGGGTTGAAACGGTTCTCGATTGACTATTTGGAGACGAGTTTAATGTCAAAGACACCTTGTGTAGGACGTTTGAACCACGCATGGTGTGCTAAACAAAAATCAATGTGTAACGGACAGATTCAAATTTCAACGCATTTCTTTGGTCAATATCTTCACGCAA…	7792	NW_022145610.1:15461578-15462039	NW_022145610.1	15461578	15462039	LOC115929296	8545	ctctctcccatccacaATGTACAGACCATTGCCCATTGGACTTGCACGCAATTCgagttattgattgattttctttcatcGTGTTCGAACGGGTTCAAGTTGGGTGCACACGGCGTCCCCCTCTCTATTTATAGACATCGTAAGCTCTACTTCTAGACAATGGTTGCCATAGAAACTCAGATTACCAATTGTTGACATTGTCGAGTCCCTTTACGATGATTCAGATCTTAACAATGGGTGGGTTGAAACGGTTCTCGATTGACTATTTGGAGACGAGTTTAATGTCAAAGACACCTTGTGTAGGACGTTTGAACCACGCATGGTGtgctaaacaaaaatcaatgtgTAACGGACAGATTCAAATTTCAACGCATTTCTTTGGTCAATATCTTCACGCAA…
Scaffold105:490307-490889	Scaffold105	490307	490889	WHL22.17913	SPU_013582	CAAGTCGTTTAGGTCACCAGGGCTATGTTTAAAAAACTGGACAAAAATATGAATAAGTGAAAAACCAGCGCGCGCCTATGGCCAGCAGGCGAGATGGAGCTAACAGGTTGGTGAAAGCCTGAGAGGAGAGGGGCTTCTTTGTTTGATACCGTGGTCGCCCTTTTCATTCATTCATTCATTGAGAGAAAGAGAGAGAGCCAGAGCTGGTAGTATTGGGGAGAGGAGCCGGAAAGGAGGTGGTAGTATTTCCCCTTTTTTTTTATTTTCANCGCGGACAAAACCACACCCCCCACGCTAGGACTGGCACGGAGGACAAACGCCAGACAGGTCCTATAGAACTGGACACTGATTGGTTTACCCTTCCATACCTCTCTCCCCCTTCCCCTTCTTCAAATCTGA…	8466	NW_022145610.1:15462252-15462830	NW_022145610.1	15462252	15462830	LOC115929296	7754	CAAGTCGTTTAGGTCACCAGGGCTATGTTTAAAAAACtggacaaaaatatgaataagtgAAAAACCAGCGCGCGCCTATGGCCAGCAGGCGAGATGGAGCTAACAGGTTGGTGAAAGCCTGAGAGGAGAGGGGCTTCTTTGTTTGATACCGTGGTCGcccttttcattcattcattcattgagagaaagagagagagctagagctGGTAGTATTGGGAGAGGAGCCGGAGAGGAGGTGGTAGTATTCACGGATTAGCATAACAAGAGGGGGACAACACCACACCCCCACGCTAGACCTGGACGGAGGACAAAGGCCAGACAGGTCCTATAGAACTGCACACTGATCGGTTCACCCCTCCCtaccctctctcccccttccccttcttcaAATCTGAACTC…
Scaffold105:492197-492541	Scaffold105	492197	492541	WHL22.17913	SPU_013582	TGGTGTCCTCCCTCGCTCCCTCCCCAAGGGCAGTCCTCACCTGCTCTATATCGGTCACTTCGATCTCATTTTGGCCATTATGCTACGTCATCAACTGACCATTGGGCTTAGGTCAATAAGCCGTGCTTATCTTGAAATCCATTACTGTCTATTTTGATGACATCGTTTGCGTGATACCTACGTGCGATGGTCGGAATTCAAATAGTTTTTCTTTGAATTGGTTTGATAAACGTCATGATTATATTTAATTGTAAAGAATAATAACAACGACAACAACATCAAGACAGAGCAAGTGTTTAATGCTGTAATAGTAAATGCACAGTAGTTAAAATAATTATTAGCCA	10356	NW_022145610.1:15464138-15464482	NW_022145610.1	15464138	15464482	LOC115929296	6102	TGGTGTCCTCCCTCGCTCCCTCCCCAAGGGCAGTCCTCACCTGCTCTATATCGGTCACTTCGATCTCATTTTGGCCATTATGCTACGTCATCAACTGACCATTGGGCTTAGGTCAATAAGCCGTGCTTATCTTGAAATCCATTACTGTCTATTTTGATGACATCGTTTGCGTGATACCTACGTGCGATGGTCGGAATTCAAATAGTTTTTCTTTGAATTGGTTTGATAAACGTCAtgattatatttaattgtaaagaataataacaacgacaacaacatcAAGACAGAGCAAGTGTTTAATGCTGTAATAGTAAATGCACAGtagttaaaataattattagcCA
Scaffold105:494829-494962	Scaffold105	494829	494962	WHL22.17913	SPU_013582	CTGGTTGACCTTAGCGAGGTCACGAGTCGAAAGAAGGCAAAAAACCATGGGAAAATCCCGACCTCTTTGCATACATGAAAAATGCTACAATAGTCTGTATACTTCTCAATGCCATTTCTCGGGCGCGGGTGAG	12988	NW_022145610.1:15466769-15466902	NW_022145610.1	15466769	15466902	LOC115929296	3682	CTGGTTGACCTTAGCGAGGTCACGAGTCGAAAGAAGGCAAAAAACCATGGGAAAATCCCGACCTCTTTGCATACATGAAAAATGCTACAATAGTCTGTATACTTCTCAATGCCATTTCTCGGGCGCGGGTGAG
Scaffold105:500554-500965	Scaffold105	500554	500965	WHL22.17913	SPU_013582	GAGAATGATGATAATACTCTGTGAATCCATGTATATTGCCTTGCCACCCTTATCCCACTGAATTATACAATGTTCATTGCAACAACAGCACAGGAGGGATATACAAATTAATGTTCTTCCCTATTCTCTAAAAGGACCCATCTGTCTCCCGTTTCTATGAATCAACCGAACCTTCTATGTTGATTGTCCGTCTGTCCTTCTCATGTTTATTGTCTGTCCGTCCTTCTCAATACCCTTGCATGAATGAACCAGCATGTTAGTGACCCGCAGTCCTTCGCATGATAGCCATGATAACCAAGGAGAGGGGGTATGGATTACTGGAAATTCTGAGTCACGTATATCTCCGGGTTCGTGTCATCCGTAGAAAACCAATGATTCGAGGAATTAAAAAAGAAAGGG…	18713	NW_022145539.1:1365972-1366383	NW_022145539.1	1365972	1366383	LOC100888257	23793	aatcataaatatccctttcttttttaattcctcGAATCATTGGTTTTCTACGGATGACACGAACCCGGAGATATACGTGACTCAGAATTTCCAGTAATCCATACCCCCTCTCCTTGGTTATCATGGCTATCATGCGAAGGACTGCGGGTCACTAACATGCTGGTTCATTCATGCAAGGGTATTGAGAAGGACGGACAGACAATAAACATGAGAAGGACAGACGGACAATCAACATAGAAGGTTCGGTTGATTCATAGAAACGGGAGACAGATGGGTCCTTTTAGAGAATAGGGAAgaacattaatttgtatatcCCTCCTGTGCTGTTGTTGCAATGAACATTGTATAATTCAGTGGGATAAGGGTGGCAAGGCAATATACATGGATTCACAgagtatt…
Scaffold105:501717-501853	Scaffold105	501717	501853	WHL22.17913	SPU_013582	TGACAGAAGTCGAAAGGGGTACTCGTAATGCGGACATCCTTTATACTGAGTCATTCAAGGAAACCGTGGGTTCAGATCAAAACGAGAATATCGCATCGAGTTGGTATACAATCATGTTACAGCCTACACTGTAGCT	19876	NW_022145610.1:15474852-15474988	NW_022145610.1	15474852	15474988	LOC115929296	3141	TGACAGAAGTCGAAAGGGGTACTCGTAATGCGGACATCCTTTATACTGAGTCATTCAAGGAAACCGTGGGTTCAGATCAAAACGAGAATATCGCATCGAGTTGGTATACAATCATGTTACAGCCTACACTGTAGCT
Scaffold105:830344-830437	Scaffold105	830344	830437	WHL22.18236	N/A	TTGTATTATGTGTGTATTGACTATTCCTTTTGAGCAAATGCTGCCTAAAACTTAAGTATTAACACGTAGTGCAGTGCTAGAGGTCAATATGCA	4774	NW_022145550.1:75572-75665	NW_022145550.1	75572	75665	LOC754039	0	taagtgcatttgtgtattatgtgtgtattgactattcctTTTGagcaaatgctgcctattaacatgtagtgcagtgctagaggttaATACGCA
Scaffold1052:153735-154383	Scaffold1052	153735	154383	WHL22.19363	SPU_001740	GTTTGTTCCATCGATATCTTTCTCGACGCACCTACTGATCCATCCATTCCTTTTAAAATAAAATTAAAGGAAGAAATACTTTTGGCATATTGGAAAGAAAACTGGAAAATGTGTTATTTTCTTAGAAAAATGATTACAGGGTCGACAATGATGCGTCAAATTTAATTGTGTATATTATGTAAGAGTTTTTTTGTTTTTTTGTTTGTGTATGTGCATGGTGTTAGTGTGTGTGTGTGTGTGTGTGTGTGTGCGAGTGCATGTGTTTGGAGCGCTTATTGAATTATGACTTGTATGCTGGTAGTAATTAACATTTCATGGCAGCCTTGAAAATATATATTGCAGTACATGATTTAACAGTAGTTGGGAGATTATTCCATACGTCAGGGCCATGGTGTCGGA…	0	NW_022145615.1:25152142-25152790	NW_022145615.1	25152142	25152790	LOC115920552	0	TGCTTACAGCACAGCACCATCTGCCTTTGAGATTGGTTACAGTTTACCGCCCACAGCGTTCTAGTTCTGGCAACCTAACTGATCAAACTTTCTTTATAGAATTTGCGTCTTTTCGGAACAAGTAATAACATTTAAGCATCGTGTGTTGATTGTTGGGGATTTTAACTTTCATGTTGATGATGCGACATACCTTGTAGCTGCAGAACTTTCATTTGATAAACCTACTATTGCTAATGGCGCATAAATCTATCCGACACCATGGCCCTGACGTATGGAATAATCTCCCAACTACTGTTAAATCATGTActgcaatatatattttcaaggcTGCCATGAAATGTTAATTACTACCAGCATACAAGTCATAATTCAATAAGCGCTCCAAACACATGcactcgc…
Scaffold1052:154978-155263	Scaffold1052	154978	155263	WHL22.19363	SPU_001740	CAATATGTCACCAGTTGTACTTGAAAGGTGCAGTCTATTCGTCTGTAGTATGGTATTCTTCAGCCAACATATTGACTCACAGTGGAAGCATGATGGTGTAATTCAGTAAAGCTTTTCACAAAGCATTAATGATTAGCCTGCTCATCGCTGAACAGGAGGCCAAGGATTACCAAGAGAACATGAATGGATGCCATTGTCCATTCAAGACTCAACTACCATTGTAAAAGTTAGCACTGTGGGCTAGCTACATGTAGCACGGCTTACTATATAAGATTGACCTGTATG	0	NW_022145615.1:25151262-25151547	NW_022145615.1	25151262	25151547	LOC115920552	0	CATACAGGTCAATCTTATATAGTAAGCCGTGCTACATGTAGCTAGCCCACAGTGCTAACTTTTACAATGGTAGTTGAGTCTTGAATGGACAATGGCATCCATTCATGTTCTCTTGGTAATCCTTGGCCTCCTGTTCAGCGATGAGCAGGCTAATCATTAATGCTTTGTGAAAAGCTTTACTGAATTACACCATCATGCTTCCACTGTGAGTCAATATGTTGGCTGAAGAATACCATACTACAGACGAATAGACTGCACCTTTCAAGTACAACTGGTGACATATTG
Scaffold1052:42819-43011	Scaffold1052	42819	43011	WHL22.18994	SPU_005483	GACCATAGAAACACATGTATAAAAAGATGAAGTGTTTACTTCATACAATTGCAATAATATGTTTTTTCTACCACAATGCAACACTATTGCAATACTCCGCTGGTCTTTGTTAGTAACAGGCTTGCATCAATAACCACTAACAAATATGTGCACATCTGTAAACTACACAATTACTGTAAACAAGGCATGGAA	21182	NW_022145615.1:25267396-25267588	NW_022145615.1	25267396	25267588	LOC586682	7800	TTCCATGCCTTGTTTACAGTAATTGTGTAGTTTACAGATGTGCACATATTTGTTAGTGGTTATTGATGCAAGCCTGTTACTAACAAAGACCAGCGGAGTATTGCAATAGTGTTGCATTGTGGTAGAAAAAACATATTCTTGCAATTGTATGAAGTAAACACTTCATCTTTTTATACATGTGTTTCTATGGTC
Scaffold1053:108182-108563	Scaffold1053	108182	108563	WHL22.19600	SPU_027400	CCCCCCCTTATTTTCTCAGGGGTGACACAACAACTTTAATTTCTACATTTATAGTAGAATCAAATCATGAGAGCTTAGGTATTTTGCTTTGAAACTCGAGTCTTGAATTACATCTCCGTGCTATAATTCATCGTTCCTTTGAAATTCCATCCCACTTTTACGCGGGCGCGAGAAAAGATCCGATTGTTTGCTTGAGTCGTCCAACTTTTCTCTCGCTTTGCGGTGAGATACATTTTGCACTTTTCCTTCCTTCTCCTTTTCTTGATCGTAGGAATGTAATTCATCCTCACTATCAACGTGACTTTGGCGTTTTACAAACTTTTCATCGATGTCGGATGAAATCTGTTCGGTAGCTCTTCGCGTAATTTCGGTTTCCGAACC	0	NW_022145609.1:15828468-15828849	NW_022145609.1	15828468	15828849	LOC100887892	0	cccccccttattttctcaGGGGTGACAAAACAACTTTAATTTCTACATTTATAGTAGAACCAAATCATGAGAGCTTAGGTATTTTGCTTTGAAACTCGAGTCTTGAATTACATCTCCGTGCTATAATTCATCGTTCCTTTGAAATTCCATCCCACTTTTACGCGGGCCCGAGAAAAGATTCGATTGTTTGTTTGAGTCGTCCAACTTTTCTCTCGCTTTGCGGTGAGATACATTCTgcacttttccttccttctccttttcttgaTCGTAGGAATGTAATTCATCCTCACCATCAACGTGACTTTGGCGTTTTACAAACTTTTCATCGATGTCGGATGCAATCTGTTCGGTAGCTCTTCGCGTATCTTCGGTTTCCGAACC
Scaffold1053:130133-130416	Scaffold1053	130133	130416	WHL22.19600	SPU_027400	GTCGAAACTGGTCGAATACAGGAAGGGAACGGAGAGAAAAGGAACGCTATCAAAGGATTGAATTTCCTATTACTCATTTGTACTATAATGAGAGTTGACTGGCGCAATTAGGCTTGGGGGTTCCCGGTAAATGGACACAAGGGCACACTGTAAATAACTCTATCGGTGGTTAAAGATCATTCTGGACAATACAGACAACGTATGGAAGTTCCTTGAAATCTCCTTGAGTAAGCGAGCACGCGATCTCCCGCCGTGCAAATTATCACGGAAAGTGTAGAGTATA	0	NW_022145609.1:15851210-15851493	NW_022145609.1	15851210	15851493	LOC100887892	0	GTCGAAACTGGTCGAATACAGGAAGGGAACGGAGAGAAAAGGAACGCTATCAAAGGATTGAATTTCCTATTACTCATTTGTACTATAATGAGAGTTGACTGGCGCAATTAGGCTTGGGGGTTCCCGGTAAATGGACACAAGGGCACACTGTAAATAACTCTATCGGTGGTTAAAGATCATTCTGGACAATACAGACAACGTATGGAAGTTCCTTGAAATCTCCTTGAGTAAGCGAGCACGCGATCTCCCGCCGTGCAAATTATCACGGAAAGTGTAGAGTATA
Scaffold1053:172158-172245	Scaffold1053	172158	172245	WHL22.19132	N/A	GCGACATTAATGTGATTACGACACAATAAAAACCCGGATTCTGTGCAAATAAAACGGTTACTTCGACACTACACTGACAAGTAATTC	0	NW_022145609.1:15890505-15890592	NW_022145609.1	15890505	15890592	LOC586597	6530	GTGACATTAATGTGATTACGACACAATAAAAACCCGGATTCTGTGCAAATAAAACGGTTACTTCGACACTACACTGACAAGTAATTC
Scaffold1053:212592-212926	Scaffold1053	212592	212926	WHL22.19679	SPU_007611	ATGCACGACAACATGGATGAAACATTCAACCTGAATGTGCACACATGTATGTACAAAGTTAATATTTAGTCTATCGATCCTAGCTACCCCATGCTAGATTCCCACGTTAAACATGGGCCATGGATGGATTAACTAAACACGTTGAGCTATGACTTCCCTCATTTCCCTAATTCTAAGAAATGCGCTGGTACATGTACTGCATGAAGTTAAATGTCAATGTAAGTAAACGACTTCCTACAATGACGACACATGCATATTTTAAGATCACAAGTTCAGCTCAACAAAGAGCTAACAATGGGTGTGTACATGTTGCAAAATGAAAGTTTAATAATCT	0	NW_022145609.1:15931680-15932014	NW_022145609.1	15931680	15932014	LOC586051	0	ATGCACGACAACATGGATGAAACATTCAACCTGAATGTgcacacatgtatgtacaaagtTAATATTTAGTCTATCGATCCTAGCTACCCCATGCTAGATTCCCACGTTAAACATGGGCCATGGATGGATTAACTAAACACGTTGAGCTATGACTTCCCTCATTTCCCTAATTCTAAGAAATGCGCTGGTACATGTACTGCATGAAGTTAAATGTCAATGTAAGTAAACGACTTCCTACAATGACGACACATGCATATTTTAAGATCACAAGTTCAGTTCAACAAAGAGCTAACAATGGGTGTGTACACTATgcaaaatgaaagtttaatcattt
Scaffold1053:224797-225864	Scaffold1053	224797	225864	WHL22.19679	SPU_007611	CGGCACTCAAAACGTTAGCGTATGCTCAAACACGCCGTGTCGGCATTGGATTCATGCATTATCCACAATCACACGTCCAACTTCAGTTTCCTACACAACCCACAACCCTACTCCACGAACGCACTCGAAAAATTGCAAAATCGCCATTTTGGAACAACGATTCTTTGCTACAAAATATAGGAAACGAATATATTGGTAAATTCATTTGAAAATAATTTGGTTCTACGACTACTGAGGAACGGTTTAAACATCACATAAGGAACACACAACGTACGCCGCATAGCATAAAAAGGAAAAAATTACCTTGTCGTTGGCGGGTAACAGTCGCCAGGACTACGGTGACTATGGCGTTTATTCTCAAGGCAACTGTTGCTAAACCTCACCACTGTAAGATTTGAC…	0	NW_022145609.1:15940473-15941540	NW_022145609.1	15940473	15941540	LOC586051	0	CGGCACTCAAAACGTTAGCGTATGCTCAAACACGCCGTGTCGGCATTGGATTCATGCATTATCCACAATCACACGTCCAACTTCAGTTTCCTACACAACCCACAACCCTACTCCACGAACGCACTCGAAAAATTGCAAAATCGCCATTTTGGAACAACGATTCTTTGCTACAAAATATaggaaatgaatatattggtaaattcatttgaaaataatttggttCTACGACTACTGAGGAACGGTTTTAACATCACATAAGGAACACACAACGTACGCCGCATAgcataaaaaggaaaaaattacCTTGTCGTTGGCGGGTAACAGTCGCCAGGACTACGGTGACTATGGCGTTTATTCTCAAGGCAACTGTTGCTAAACCTCACCACTGTAAGATTTGAC…
Scaffold1053:230424-230779	Scaffold1053	230424	230779	WHL22.19177	SPU_007610	GGGCTGGGTTTATTATGAAGGCCTCTTATTTAATCGACGGAACTATTTTAAGTAAACCCCTGGTACCTTCCCTCTCTTAATTTATTGTCCCACGTAGACCTATACACATACTTGTGTTAATCCGAGTTTGACTTTACCCCCTCCGCTCTTATTTGCATACAACCGTTATTTGCGAGCACATCTCCCCTGTCAATAGTTCTTTGTTGTACTTCCACAAGTGAGCGCGAACAAGGTTATGAAATGTTGGTCCGTAATGGGATAAGTATATCTTCCCGTAGGAAGGTGTACAGTTATACAATAGGCCTCCCGCGATCGATAATTGGTGGAGTAGAAAGAGAAAAGGAGAATGAAAAGA	2889	NW_022145609.1:15947122-15947477	NW_022145609.1	15947122	15947477	LOC578795	2620	GGGCTGGGTTTATTATGAAGGCCTCTTATTTAATCGACGGAACTATTTTAAGTAAACCCCTGGTACCTTCCCTCTCTTAATTTATTGTCCCACGTAGACCTATACACATACTTGTGTTAATCCGAGTTTGACTTTACCCCCTCCGCTCTTATTTGCATACAACCGTTATTTGCGAGCACATCTCCCCTGTCAATAGTTCTTTGTTGTACTTCCACAAGTGAGCGCGAACAAGGTTATGAAATGTTGGTCCGTAATGGGATAAGTATATCTTCCCGTAGGAAGGTGTACAGTTATACAATAGGCCTCCCGCGATCGATAATTGGTGGagtagaaagagaaaaggagaatgaaAAGA
Scaffold1053:250338-250630	Scaffold1053	250338	250630	WHL22.19177	SPU_007610	CACCAAGTTTATAGACCCAAGTCACCCAACGAGGCAAAATGTGCCCCTGTTCGGGTCGACCTCTTAGATACTCAAGTTCATTCACGCAGCTTGGGCCGTTATCTTTCAAAGATTAGTCATTGTTGAGACATGAATTCAATCTATTTTTTAAATGGACCATTATATGTCATCATCACTGTTTGATTATGATAAAAAGGGGCTCTTACTTTGTGTGAGTTAACGCCCTTTTAGTTCTCAGCATTGCTCGCGAATGCAAGTAGTTTAAACGATTTATGGTCATCATTGGAGCATC	2993	NW_022145609.1:15966401-15966693	NW_022145609.1	15966401	15966693	LOC578795	2985	CACCAAGTTTATAGACCCAAGTCACCCAACGAGGCAAAATGTGCCCCTGTTCGGGTCGACCTCTTAGATACTCAAGTTCATTCACGCAGCTTGGGCCGTTATCTTTCAAAGATTAGTCATTGTTGAGACATGAATTcaatctattttttaaatggacCATTATATGTCATCATCACTGTTTGATTATGATAAAAAGGGGCTCTTACTTTGtgtgagttaacgcccttttaGTTCTCAGCATTGCTCGCGAATGCAAGTAGTTTAAACGATTTATGGTCATCATTGGAGCATC
Scaffold1053:285676-285972	Scaffold1053	285676	285972	WHL22.19353	SPU_024949	GCCCCACTTAGACTGCTTGCCTCTGACCACTACTCTTTGCTGCCGTCCACTCAGAAAAGACTCTAACCATGCAAGTACATTCCCACGAACTCCATACGATTCTAATTTGAGAAGCAGTCGGTGGTGAGGCACCGTATCGAACGCCTTAATAACACGTTGTTGAAATAAAAAATAATTCTGATGTCATGCCTTGTTTGTTTTTCCAGCCTTTCGCGTCAAATGCGCATGACTATGAAAACATTTGCATTTGCAACAAAGTTGTTTAAAGCATGATTTTTTTGGTTTTGCTCTTCAGA	3497	NW_022145609.1:16009417-16009713	NW_022145609.1	16009417	16009713	LOC764926	0	GCCCCACTTAGACTGCTTGCCTCTGACCACTACTCTTTGCTGCCGTCCACTCAGAAAAGACTCTAACCATGCAAGTACATTCCCACGAACTCCATACGATTCTAATTTGAGAAGCAGTCGGTGGTGAGGCACCGTATCGAACGCCTTAATAACAcgttgttgaaataaaaaataattctgaTGTCATGCCTTGTTTGTTTTTCCAGCCTTTCGCGTCAAATGCGCATGACTATGAAAACATTTGCATTTGCAACAAAGTTGTttaaagcatgatttttttggttttgCTCTTCAGA
Scaffold1053:304598-304717	Scaffold1053	304598	304717	WHL22.19204	SPU_024951	TGTTAAAAGTAAAGCTTTGTGAAGGAGAGCTTCAACATATGGTTAATGTCGCCCTCTTGTGACAAAACTGGCACAGGCCACCCTCCACAAAAGATTACTCAAACCATACCAAACAGTTC	0	N/A	N/A	N/A	N/A	N/A	N/A	N/A
Scaffold1054:126413-126659	Scaffold1054	126413	126659	WHL22.20888	SPU_016397	TGCTCTGGTTTCCTCATCACGTATCATTAAAGTAAGGATCCTGGTAAGATTTAAAGCCGACCAAACAATGCTCTTGTGGTATGATCTACCACTATGTTCGGAGATGGCTGTACATTAAACAAAGGCCGGAAGCGGGAATGTAGGCATTGTGACGTCATTCGACCCCAACCAGCAAGGCTAGACACGATATGCGGTTAAACATGATAATAATTATAATCAAATATACGTGAGTTATATAGTTTCGAG	0	NW_022145558.1:383370-383616	NW_022145558.1	383370	383616	LOC575388	0	CTCGAAACTATATAACTCACGtatatttgattataattattatcatgtttaacCGCATATCGTGTCTAGCCTTGCTGGTTGGGGTcgaatgacgtcacaatgcctACATTCCCGCTTCCGGCCTTTGTTTAATGTACAGCCATCTCCGAACATAGTGGTAGATCATACCACAAGAGCATTGTTTGGTCGGCTTTAAATCTTACCAGGATCCTTACTTTAATGATACGTGATGAGGAAACCAGAGCA
Scaffold1054:128355-128835	Scaffold1054	128355	128835	WHL22.20888	SPU_016397	GGTTCTGTGAGAATTTATTTTCTATCATTACCGGAACTCGAGCTTATCTTTAAGACAAAGGACAGCTTATGCTGGTAGCTTTTATTCAGACCAATTTAATGAAAAGGAATTACCATCCTGTTGTGTATCAATAGACTAATTGAGAGGGATTATACTATAGGGTAAGGAGTTGTATGTAACATGGTAATCTGTATACCGGAGCTTGGCCATTGTAACGCTGGGGGAATTGATTTATATACAAAAGCAGGGCAATTTAATTGGGAATATGCCATCCCATCCGGCATTCTAAACAATATCTAAGAATAAAACAACCTTCATGCATATTTGACTCTTGCATAAGTGAGATCGCTTATCAAATTATGTGAGGGTATTGTTTTGTTTTTTGTTTGTTTTTAGCTC…	594	NW_022145558.1:381194-381674	NW_022145558.1	381194	381674	LOC575388	708	ATATTTCATTACATTCGTATCGctgtttgcattttttaatgatgaaaaacaaaaacaaacggGTACCGGCTAAAATTCTTCGagctaaaaacaaacaaaaaacaaaacaatacccTCACATAATTTGATAAGCGATCTCACTTATGCAAGAGTCAAATATGCATGAAGGTTGTTTTATTCTTAGATATTGTTTAGAATGCCGGATGGGATGGCATATTCCCAATTAAATTGCCCTGCTTTTGTATATAAATCAATTCCCCCAGCGTTACAATGGCCAAGCTCCGGTATACAGATTACCATGTTACATACAACTCCTTACCCTATAGTATAATCCCTCTCAATTAGTCTATTGATACACAACAGGATGGTAATTCCTTTTCATTAAATTGGTCTGAATAA…
Scaffold1054:169696-169931	Scaffold1054	169696	169931	WHL22.24896	SPU_016393	ATTTCTCTCCAAGGTTATTTGATCCGTTGGGATCTCGTAGAGGGGATATCAGTCTAAGTGTAGTGATTTCCATGCCCGGCTCTGGCAGGGGAAGACATGCATACAGTCATATCCTGGCAGAAAGTGGCTCTGACTGAAACCGGGTTCAGCCCAGTTTCTGGTGGGTGCTAGTCTGTCCCCCAGACCCACCTATCCAGGGGTGCCCCAGGGATGCGTACTTCCTCCTGTGCTTATC	0	NW_022145558.1:337818-338053	NW_022145558.1	337818	338053	LOC115918906	0	GATAAGCACAGGAGGAAGTACGAATCCCTGGGGCACCCCTGGATAGGTGGGTCTGGGGGACAGACTAGCACCCACCAGAAACTGGGCTGAACCCGGTTTCAGTCAGAGCCACTTTCTGCCAGGATATGACTGTATGCATGTCTTCCCCTGCCAGAGCCGGgcatggaaatcactacacttAGACTGATATCCCCTCTACGAGATCCCAACGGATCAAATAACCTTGGAGAGAAAT
Scaffold1054:171322-171693	Scaffold1054	171322	171693	WHL22.24896	SPU_016393	ACTATTCCAGATTAGAGTGGGGCCCTCAAAATGATGCTCAAACAGGCATTTCGCTGAATGACATTCGGACTAGAAAAAAAGTACTTAAACTGTAAGATATAACTATACAAGACTCGTTTAGCTATTCGAAAAATGCTGGTAGTCTGAATGCAGGGTTAGTGTGTCCTTTGAAATGACTCAGAGCTATATAATGTTTTTTTAATGAGACTCGAGTCATGAGTTATTGCATAATTCTCAAGTTATTGCGTAATAATTCTCGAGTTATTCCTCGTGAATGCAATTGAGGTGCTTTCGTGGAATTACCTGTGGTTAGAGACTGTTGCGCAATGCTAATTATTATGTGTGTGGTTAATAACTGGTTATGCTGTTCT	0	NW_022145602.1:15037251-15037622	NW_022145602.1	15037251	15037622	LOC575241	0	AGAACAGCATAACCAGTTATTAACCACACACATAATAATTAGCATTGCGCAACAGTCTCTAACCACAGGTAATTCCACGAAAGCACCTCAATTGCATTCACGAGGAATAACTCGAGAATTATTACGCAATAACTTGAGAATTATGCAATAACTCATGACTCGagtctcattaaaaaaacattatatagCTCTGAGTCATTTCAAAGGACACACTAACCCTGCATTCAGACTACCAGCATTTTTCGAATAGCTAAACGAGTCTTGTATAGTTATATCTTACAGTTTAAGTACTTTTTTTCTAGTCCGAATGTCATTCAGCGAAATGCCTGTTTGAGCATCATTTTGAGGGCCCCACTCTAATCTGGAATAGT
Scaffold1054:250881-251191	Scaffold1054	250881	251191	WHL22.19719	SPU_006286	ACCAAAAGGGAAGTCTTTCAAGGCTTAGTGGAGTATTAAAGTGAGATAAATGCCAACCATATGGTCATATTCTCAGCACCTGTTGAACAATGAATAAAAAAACCAAGGCTTATGCCATTCTCACTGCACCTAAACAGTGAAGCAAGGTAGACAACCATTAGCAATTTACGCTGGTATATGTTGCAGGCTTTCAATTTGACAGGGTTTTTTCTTCTCCAACGAAAACCTTGCAAAATTTGCTGGTATCTGGTGTACAACCACATGTTTGTGTTATACATGGACAAACATGCTTGGTTCCTGGGAATGGGCA	0	NW_022145558.1:279121-279431	NW_022145558.1	279121	279431	LOC583063	5287	TGCCCATTCCCAGGAACCAAGCATGTTTGTCCATGTATAACACAAACATGTGGTTGTACACCAGATACCAGCAAATTTTGCAAGGTTTTcgttggagaagaaaaaacccTGTCAAATTGAAAGCCTGCAACATATACCAGCGTAAATTGCTAATGGTTGTCTACCTTGCTTCACTGTTTAGGTGCAGTGAGAATGGCATAAGCCTTGGTTTTTTTATTCATTGTTCAACAGGTGCTGAGAATATGACCATATGGTTGGCATTTATCTCACTTTAATACTCCACTAAGCCTTGAAAGACTTCCCTTTTGGT
Scaffold1054:251592-251781	Scaffold1054	251592	251781	WHL22.19719	SPU_006286	CGGCAAATTTTTTATCATCATGTATTAGTCAAAACATATTCTTTCACATGATTGGTAATGAGAGCTTCCATTTCATTTTTTGAAATTGGGGCGTTTCCAATACTGGTCTTTACCTTTAACTCTTTGTAAATTGATATGAGTTTTAATGCCCTTTTGAGTCCAAACTCGATTTGTAATACATGTACATTC	0	NW_022145558.1:278531-278720	NW_022145558.1	278531	278720	LOC583063	5998	gaatgtacatgtattacaaatcGAGTTTGGACTCAAAAGGGCATTAAAACTCATATCAATTTACAaagagttaaaggtaaagaccagtattggaaacgccccaatttcaaaaaatgaaatggaagctctcattaccaatcatgtgaaagaatatgttttgactaatacatgatgataaaaaatttgccg
Scaffold1054:252824-253211	Scaffold1054	252824	253211	WHL22.19719	SPU_006286	ACCACTTCTCGAATTAGATCTTTAGATCAATAGGTATCATTACAGAGTTAAAGATAATTCTGATAGAGGCACGGACCTACCCACACCCCTACAGTGTTTCACCATAGACTAGTTGATCCATACGTGTACTTACAAGTTTGCCAACGTCCCATTAATACACATCGCAATATAGGATATCTTCAATCTTGTACCTCTCACAGTTGCGTGAAAAGCGAAACGATGCACAGATGCGAAGAAAATCTATTCTTAGCCAACGTACCCCATTTTGTAGTTGAAAATATCACAGCAGCTGTAAGCTTGTTTACACTTGCAGTAAATTCTCTCATAACTGTTATTATGCACTGTGCATAATGTATGTCTAAGCAACGAGTTACAAAAAACGAAACA	0	NW_022145558.1:277101-277488	NW_022145558.1	277101	277488	LOC583063	7230	TGTTTCGTTTTTTGTAACTCGTTGCTTAGACATACATTATGCACAGTGCATAATAACAGTTATGAGAGAATTTACTGCAAGTGTAAACAAGCTTACAGCTGCTGTGATATTTTCAACTACAAAATGGGGTACGTTGGCTAAGAATAGATTTTCTTCGCATCTGTGCATCGTTTCGCTTTTCACGCAACTGTGAGAGGTACAAGATTGAAGATATCCTATATTGCGATGTGTATTAATGGGACGTTGGCAAACTTGTAAGTACACGTATGGATCAACTAGTCTATGGTGAAACACTGTAGGGGTGTGGGTAGGTCCGTGCCTCTATCAGAATTATCTTTAACTCTGTAATGATACCTATTGATCTAAAGATCTAATTCGAGAAGTGGT
Scaffold1054:254737-255101	Scaffold1054	254737	255101	WHL22.19719	SPU_006286	CCCTACTCACATTCCTCCCTTTTCAAATATTTCAATAACTTCACATTTTTGTTCACAATAGGCCCCTATTCAAAAGAGCCCTCTCAGCTATCTGTTTTTTTTAAGGGGGTCACATAACACAGGACCACTCCCATCCATCAAAAGGGTACTAATCCCTATACAATCTATCCCCCAGAAAATCCCACTTTTTGTGAATGAAACTGAGATTTGAAAAGGAATCTATCTCTTTCCGGTTCAATGATTACTGCAGGCAGAAGATGTACACACTGAAAAGACATACAAAATTGTTATCATAGGTACACTGTGTGTGTGATATATTACTACTGCTGGTTCATGTAGAGGTCAGAGTACTGGAACTACTTTC	0	NW_022145558.1:275212-275576	NW_022145558.1	275212	275576	LOC583063	9142	GAAAGTAGTTCCAGTCCTCTGACCTCTACATGAACCAGCAGTAGTAATATATCACACACACAGTGTACctatgataacaattttgtatGTCTTTTCAGTGTGTACATCTTCTGCCTGCAGTAATCATTGAACCGGAAAGAGATAGATTCCTTTTCAAATCTCAGTTTCATTCACAAAAAGTGGGATTTTCTGGGGGATAGATTGTATAGGGATTAGTACCCTTTTGATGGATGGGAGTGGTCCTGTGTTATGtgacccccttaaaaaaaacagataGCTGAGAGGGCTCTTTTGAATAGGGGCCTATTGTGAACAAAAATGTGAagttattgaaatatttgaaaagggAGGAATGTGAGTAGGG
Scaffold1054:265551-266044	Scaffold1054	265551	266044	WHL22.19719	SPU_006286	ATATTACTCCTGTATTATGCATGAAAAACAGAGCGTTCTGTATGTTTACTTATATGCTAGTATCTCCAACTTATTCAAAGGTTAAAACAACCACGAAACCCAGTAGGTCTTTGAGTCTATTAGTTTAATGAATTTTCAAGTAGTTCCACTCTAACACAATCTTTTTCCTTTCACCCGCCCACCAACCCCCATTCTCCGAGCGATCGTCTCCCCTGCCGCCCTTCATGTCATGAGTACCCCGGCCAAACACACACCCCCTTTGAAAACCCCCTCCAAAAGCCGCCCACAAAGGCAAACCCTCAAATCCCCCTCCTTGTGAACCCGCAATCCCCTTCACAAAGTTCCCCCTATTCATACTCCCAATTGAGCTTTCATTGCCTTGGGTATTGCATGGGATTA…	0	NW_022145558.1:263916-264409	NW_022145558.1	263916	264409	LOC583063	20309	AACTaatctttctctcattctgcTCTTGTCTGTCTGTAGCCTTGGAGGCTAAACTTCAAAAATCTGGAGTTGTGGACCCCtcccctaatttgcataatccCATGCAATACCCAAGGCAATGAAAGCTCAATTGGGAGTATGAATAGGGGGAACTTTGTGAAGGGGATTGCGGGTTCACAAGGAGGGGGATTTGAGGGTTTGCCTTTGTGGGCGGCTTTTGGAGGGGGTTTTCAAAGGGGGTGTGTGTTTGGCCGGGGTACTCATGACATGAAGGGCGGCAGGGGAGACGATCGCTCGGAGAATGGGGGTTGGTGGGCGGGTGAAAGGAAAAAGATTGTGTTAGAGTGGAACTACTTGAAAATTCATTAAACTAATAGACTCAAAGACCTACTGGGTTTC…
Scaffold1054:281322-281668	Scaffold1054	281322	281668	WHL22.19719	SPU_006286	GTAATTTAAATAAGCCTTAAAGTTAAACAGCACAATGTCTGTTCCTGTAGTACTAGTACTAGTAGGGGTAGTAAGTCTGCCTTCATTAATTTTGGATGTTGCGCGTTTTTACAAAATCAATAGGTTACAAAAGCCTACACAAGTGGCGAATACTGGAATAGTTCACAGGAAAGGGCCGGTTACTATGAATAGTGGGGCGCGACTATACAAACAATAGGAATGGGAGCAACAGGTAATAATAGCACACCCATTCAATGAACCCCATACAAGCGGTACCATGACATACCAGTACACACAGATCACACACACAGTATCTAGGACGCTACCGGCGTTTCAGAGGCAGCCC	0	NW_022145602.1:14939072-14939418	NW_022145602.1	14939072	14939418	LOC105437543	10373	GGGCTGCCTCTGAAACGCCGGTAGCGTCCTAGATACTGTGTGTGTGATCTGTGTGTACTGGTATGTCATGGTACCGCTTGTATGGGGTTCATTGAATGGGTGTGCTATTATTACCTGTTGCTCCCATTCCTATTGTTTGTATAGTCGCGCCCCACTATTCATAGTAACCGGCCCTTTCCTGTGAACTATTCCAGTATTCGCCACTTGTGTAGGCTTTTGTAACctattgattttgtaaaaacGCGCAACATCCAAAATTAATGAAGGCAGACTTACTACccctactagtactagtactacagGAACAGACATTGTGCTGTTTAACTTTAAGGCTTATTTAAATTAC
Scaffold1054:288008-288398	Scaffold1054	288008	288398	WHL22.19719	SPU_006286	GCCGACAAAGAATAATTTCCAACGCAGGTTATTTCCTCGGTGGTATAGCTTCCAAACAACAATCTCTGCTATTGTGGTCTGTAGACTATAGAGGGGGCGAGTCCATTATCCATTGAACATTGGTCAATGACAAAGTAACGGAGCTCGACCATCGATTGGTAAGCTCGATTTACATTATGTTATCCCAAATCCACGTTTATCCGGCTTTAAGTTTCATGACAAAAGAAAGACAAAATGTGCGTGGTACCACCATGTTGTTGTCCCGAACTGCAGGGATATTGATCACCGAAAATCTCAGACTTTGGAGCATTTAACCGTGATTTATGTATTTGACCCCACCCCAAGAAAATTTAGACTGCACGCGGCATAATGATAGGTAATTAAAGGAGG	0	NW_022145602.1:14934189-14934579	NW_022145602.1	14934189	14934579	LOC105437543	5490	CCTCCTTTAATTACCTATCATTATGCCGCGTGCAGTCTAAATTTTCTTGGGGTGGGGTCAAATACATAAATCACGGTTAAATGCTCCAAAGTCTGAGATTTTCGGTGATCAATATCCCTGCAGTTCGGGACAACAACATGGTGGTACCACGcacattttgtctttcttttgtcATGAAACTTAAAGCCGGATAAACGTGGATTTGGGATAACATAATGTAAATCGAGCTTACCAATCGATGGTCGAGCTCCGTTACTTTGTCATTGACCAATGTTCAATGGATAATGGACTCGCCCCCTCTATAGTCTACAGACCACAATAGCAGAGATTGTTGTTTGGAAGCTATACCACCGAGGAAATAACCTGCGTTGGAAATTATTCTTTGTCGGC
Scaffold1054:288881-289031	Scaffold1054	288881	289031	WHL22.19719	SPU_006286	ATTAAAGATGAAGAAAGGCACTTATGAGAACAGAAAAAGGGCACTTATTACAAAAGAGGAGCAATTATCAGAAGGAAAATGGCACTAATTACAAAGGATAAGGGGTATACGTGTGAAAATAAATGGGGCACTTTTTGGAGATAAAGGGGC	0	NW_022145220.1:1935-2077	NW_022145220.1	1935	2077	N/A	N/A	ATTAAGATGAagaaggcacttatgagaacaaaaagggcacttattacaaagagGAGCAATTATCAGAAGAAAATGGCACTAATTACAAAGGATAAGGGTATACGTGTGAAAATAAATGGGGCACTTTTTGGAGATAAAGGGC
Scaffold1055:51176-51706	Scaffold1055	51176	51706	WHL22.19479	N/A	CCTATTTTACTTTGACAAGTGTCCCTATTAATTTGTAAAAGTGCCCCTTCCCCTTTTCAACTCTGATAAGTGCTCCTTTTCTTTTGACACACACCCCTTTTCCTTCGACGAGTTCCTATTTTCCTTTACAATAAGTGTCCATTTTCCATTCTCATTAGTGTCCTTTTAATCTCTAGTAAGTATCCCTCTTTAAGTACGAGAAGTGCCCCTCTTCACTTTTGATAAATGCCCCCATCAACTCCGATAAATGCCCCTATTAAAATCTGATCGGTGCCCCTTTTCTTTCAACTAAAGCTTTTTTTTATCTCTCTCTCTCTCTCTCTCTCTCTCACTCTCTCTCTCTTTCTTTCAATATCTTTCCATTCCCCCATGTCTTTCTCGCCTCTCTTTCCCTCATGT…	43249	NW_022145598.1:26026888-26027418	NW_022145598.1	26026888	26027418	LOC115923067	30706	cctattttactttgacaagtgtccctattaatttgtaaaagtgccccttccccttttcaactctgataagtgctccttttcttttgacacacaccccttttccttcgacgagttcctattttcctttacaataagtgtccattttccattctcattagtgtccttttaatctctagtaagtatccctctttaagtacgagaagtgcccctcttcacttttgataaatgcccccatcaactccgataaatgcccctattaaaatctgatcggtgccccttttctttcaactaaagcttttttttatctctctctctctctctctctctctcactctctctctctttctttcaatatctttccattcccccatgtctttctcgcctctctttccctcatgt…
Scaffold1056:119823-120087	Scaffold1056	119823	120087	WHL22.19692	SPU_003803	AATCATTTTGGACCACTCTGTACTAGCCTTTTATCACAACCAAGTCCACTCATGTGTCATTGACAATAACAAGATTAAGCAGATTTAAACTTGAGGAGATCCTTTCATACCCATTAAACCATGTCATAATGTATGCAAATGAGGAAGGGGGAGGGGTCTCCTTTATTGTCTGTTTAAATCCAGGAGAGGATTAACTCATACTGTAATATAGGGTTAATCTGGCTTTGAACTGTTTGGAGCCAGAAGTGTGCTAACTCTCACTCA	0	NW_022145596.1:10190507-10190771	NW_022145596.1	10190507	10190771	LOC115922210	0	aatcattttgGACCACTCTGTACTAGCCTTTTATCACAACCAAGTCCACTCATGTGTCATTGACAATAACAAGATTAAGCAGATTTAAACTTGAGGAGATCCTTTCATACCCATTAAACCATGTCATAATGTATGCAAatgaggaagggggaggggtctcCTTTATTGTCTGTTTAAATCCAGGAGAGGATTAACTCATACTGTAATATAGGGTTAATCTGGCTTTGaactgtttggagccagaagtgTGCTAACTCTCACTCA
Scaffold1056:20326-20389	Scaffold1056	20326	20389	WHL22.19569	N/A	AGTTCTTACCTGAAAATGACCCAAATCTCGGAGCATGGCCTGGACTGGGGCCTTGACCTACTG	0	NW_022145612.1:50677846-50677909	NW_022145612.1	50677846	50677909	LOC764578	3790	CAGTAGGTCAAGGCCCCAGTCCAGGCCATGCTCCGAGATTTGGGTCATTTTCAGGTAAGAACT
Scaffold1056:20725-21093	Scaffold1056	20725	21093	WHL22.19569	N/A	CACCCTTCTATAAGTACTTCACCGCCCCTCAGATTGTATTTCACCAGTGTTTACTGGTTATTTACTGGTTTTCTTTATAGTAAGTGAAGACAGTTTGTTTGCTATGCCACTAAAATATGTACAAATCGTGCCCTAATTTGGTAAGGCACTAATCCTCGCTACCAAGCACATTTTTTTTTTGTGTCCCAAAATTTCGATATTTCGTTTTGTTGGGGGGGGGGGGGTAAAGTCAGCTTTTTGGGGTCACCCATTACCACAATTTTGTTTAAATTAAAAAACAAAACAAAAGGGAGGGGGTTCCTCCAAAACACACACATACAAAAAAGTTAAAGGGGGCGGGTTCAACCCGCCGCCCTGCGTACGCGCCT	0	NW_022145612.1:50675941-50676312	NW_022145612.1	50675941	50676312	LOC764578	1885	aggcgcgtacgcagggcgGCGGGTTGAACCCGCCCCCTTTaactttttgtatgtgtgtgttttggaggaaccccctcccttttgttttgttttttaatttaaacaaaattgtggtaatgggtgaccccaaaaagctgactttaccccccccccccccccccccaacaaaacgaaatatcgaaattttgggacacacaaaaaaaatgtgcgTGGTAGCGAGGATTAGTGCCTTACCAAATTAGGGCACGATTTGTACATATTTTAATGGCATAGCAAACATACTGTCTTCACTTACTATAAAGAAAACCAGTAAATATGGAAACACTGGTGAAATACAATCGGAGGGGCGGTGACGTACTTATAGAAGGGTG
Scaffold1056:24226-24567	Scaffold1056	24226	24567	WHL22.19569	N/A	GATGATAATTGTTGGCAGAAAGATATAGAGAAAAAACAAGAGAGAGGTGTATTTTTCGTGAGTGGAGTATGGAAAAGGACTGGTGAACCAGGAGAGAGAGAAAGAGAGTGAGTGGGCGATGGTTCCACTCACAAAGGAATACCGCTCTGAAATCCCCTTTCTTTCTTTTAAATTTCTTTGAATTGGTGGTTAAGATCCCTTCATGCAAATAATTACAATTATGGTTTTTTTACCGACCCCTATACTTGGCATAACAAGGTTTATAATGATTACCTAATAGCGGAGAGGCGACACACAATAGGGGCAGTGCAATTTAAATGCATAAAATTGGAGAGAGTGGG	1497	NW_022145612.1:50671708-50672049	NW_022145612.1	50671708	50672049	LOC764578	0	CCCACTCTCTccaattttatgcatttaaattgcactgcccctaTTGTGTGTCGCCTCTCCGCTATTAGGTAATCATTATAAACCTTGTTATGCCAAGTATAGGGGTCGGTAAAAAAAccataattgtaattatttgcATGAAGGGATCTTAACCACCaattcaaagaaatttaaaagaaagaaaggggattTCAGAGCGGTATTCCTTTGTGAGTGGAACCATCGCccactcactctctttctctctctcctggtTCACCAGTCCTTTTCCATACTCCACTCACGAAAAATACAcctctctcttgttttttctctatatctttctgCCAACAATTATCATC
Scaffold1056:28363-28466	Scaffold1056	28363	28466	WHL22.19569	N/A	ATGGCACTAAAAATTAGTGACAGTAACGACGAATAAGGGAAAGACAAGGGGACGGGGGGTGTGCGTGAAGGCGGATGCATTGAGGGGGGAGGGGTGACTGGCC	5634	NW_022145614.1:11228817-11228928	NW_022145614.1	11228817	11228928	LOC589904	7635	atggcactaaaatttagtgacagtaacgacgaataagggaaagacaaggggaaggggggtgcgtgaaggcggatgcattgaggggagggggggggggaggggtgactggct
Scaffold1056:30313-30690	Scaffold1056	30313	30690	WHL22.19569	N/A	ACCCTCTACCTGATCGTAAATACTTTAGCACACCCATTTTGATAAACGTTCCGCGGGGTCTGTTTATATAATATATACGCATAAAACACTGATCTTTATGGTGTCTTTAACGTGACATAGCTTCTTCTCCCCTTGTAAACGAGAAAGAAAACAAGGTCATTTAAAGGGATTAAGCGACAAATAATGATTGTGATTCAAATTGTGCAAATATTTTTTTGAATAAGCACTGCTATTCACCAGAATCTTCTTTGTAAAAACAACTTTTACAAATCTCAGCCATGCTTACTGAGTTGAGACGTTCCATTCAATTTAAAGTACTCATTAAAGAATACACTTCTCCTACTCTGATAGTGATCTTAAAGCACAGTGGCAGAATT	7584	NW_022145607.1:32660461-32660838	NW_022145607.1	32660461	32660838	LOC593546	5567	aattctgccactgtgcttTAAGATCACTATCAGagtaggagaagtgtattctttaatgagtactttaaattgaatggaacgtctcaactcagtaagcatggctgagatttgtaaaagttgtttttacaaagaagattctggtgaatagcagtgcttattcaaaaaaatatttgcacaatttgaatcacaatcattatttgtcgcttaatccctttaaatgaccttgttttctttctcgtttacaaggggagaagaagctatgtcacgttaaagacaccataaagatcagtgttttatgcgtatatattatataaacagaccccgcggaacgtttatcaaaATGGGTgtgctaaagtatttacgatcaggtagagggt
Scaffold1056:42926-43274	Scaffold1056	42926	43274	WHL22.19603	SPU_024383	GAAGAAGTTTGCGGCCGTAACTTATTCTTGTTAAACTTTGAGGCATTGCACTAACTGTTGCACGTTAATGGTGTATCTATTGAAAGCCAAAAGGGCATTAGCTCTGTGTAACAGAATATGATTAATGTCCTTCTGTGTCTCAGCAGGCACGTTGTTCATTCCATGGTATCTGCCTGTACACAATAGGTGGGAAAAGATACCATATGAACAATCACCACTTAAGCTTCACAAAATACTTGAAACACCAAGAGCATTAGAAAAGATCATCGGGTGGCTAGCAGACATGACGAACTAGACAACAGATCATCGTATGGCTAGTACAAGGGCAGCACCAATGCCTCTTGAAAG	154	NW_022145596.1:10469102-10469450	NW_022145596.1	10469102	10469450	LOC592784	0	GAAGAAGTTTGCGGCCGTAACTTATTCTTGTTAAACTTTGAGGCATTGCACTAACTGTTGCACGTTAATGGTGTATCTATTgaaagccaaaagggcattagcTCTGTGTTACAGAATATGATTAATGTCCTTCTGTGTCTCAGCAGGCACGTTGTTCATTCCATGGTATCTGCCTGTACACAATAGGTGGGAAAAGATACCATATGAACAATCACCACTTAAGCTTCACAAAATACTTGAAACACCAAGAGCATTAGAAAAGATCATCGGGTGGCTAGCAGACATGACGAACTAGACAACAGATCATCGTATGGCTAGTACAAGGGCAGCACCAAGGCCTCTTGAAAG
Scaffold1057:4189-4670	Scaffold1057	4189	4670	WHL22.19754	SPU_009443	TGAAAGGCAAAGCAGCTATGATAAAGTTTGTTGACCTGTGCAAAAGTCTCACGAAATCTCGCAAATCGCGGGACACGAAATACGACGGTTTATCGCACTTCCGGGTGCTGTATAAATTTGGTCATTCTGCCTAATTATCGCGGGCGTTGCGGACTGACTGCAGTGTATTTGGGCGCCGGAGGTTTGTGTGTACATGTGTGTGTGACTGAGAGAGCATGCATGGGCTAGCTTGTCCCTGCATGTCCCTGCATGGACGAGGCAGGGACATGAGTGAAGATAGAAAGGGTGGCTGTGTTAATCGGCTGAATTGAAGAATGATCAAAAACTTAAATTACTCACAATATCCAAGACTTTGTTGATTGATAACTTCAATTATTATTGTTATCAATATTTTTGTAT…	1582	NW_022145605.1:36851499-36851980	NW_022145605.1	36851499	36851980	LOC115926852	0	cctctctctctctctctctctcaatattaatatccatcccttgccgactcgccccctaaaataatgttcatatataaataaaatacaaaaatattgataacaataataattgaagttatcaatcaacaaagtcttggatattgtgagtaatttaagtttttgatcattcttcAATTCAGCCGATTAACACAGCCACCCTTTCTATCTTCACTCATGTCCCTGCCTCGTCCATGCAGGGACATGCAGGGACAAGCTAGCCCATGCATGCTctctcagtcacacacacatgtacacacaaacctcCGGCGCCCAAATACACTGCAGTCAGTCCGCAACGCCCGCGATAATTAGGCAGAATGACCAAATTTATACAGCACCCGGAAGTGCGATAAACCGTCG…
Scaffold1057:45758-46016	Scaffold1057	45758	46016	WHL22.19911	SPU_009442	CACCTCAGGAATGGTGCATACGTCGGTCTGTGGAGAGAAGAAAGTGTTCAATATCGAGTGTGAGAAGACTTCCTTTTGCGACAGCCACCCAACTTGATCAGAAAATATGGGTACAGTTTCAAATCGAGGGGTCAGTGACACAAAGACATAACTCCATTTTGAGAAAAAGTGGTTATGTGTCACCGAGCACTTGGGCCTCAAAGAGTTAAATCTATGTTTCACTGGCCATTGACTATAATGGGGTGTTGGGTGGAGTTA	0	NW_022145560.1:174598-174856	NW_022145560.1	174598	174856	LOC588307	0	taactccacccaacaccccattatAGTCAATGGCCAGTGAAACATAGATTTAACTCTTTGAGGCCCAAGTGCTCGGTGACACataaccactttttctcaaaatggagttatgtctttgtgtcactgacccctcgatttGAAACTGTACCCATATTTTCTGATCAAGTTGGGTGGCTGTCGCAAAAGGAAGTCTTCTCACACTCGATATTGAACACTTTCTTCTCTCCACAGACCGACGTATGCACCATTCCTGAGGTG
Scaffold1057:83124-83294	Scaffold1057	83124	83294	WHL22.19951	SPU_014727	GAATGAATATGGGTTGCAAAGAACACACCCGCTGGTGTCAGCCGCAGGTGACATTTAACGCACGGTGATTGGCTAGCGAGGTGGTATCACGTGATGTCATCTTTATGTGCGTGTAGCGGAGTGTTTGCATAATTCATTCACATTCAAGAAAGAATGCTTGAAACCCGGTG	0	NW_022145606.1:45604353-45604523	NW_022145606.1	45604353	45604523	LOC115918889	7968	CACCGGGTTTCAAGCATTCTTTCTTGAATGTGAATGAATTATGCAAACACTCCGCTATACGCACATAAAGATGACATCACGTGGTACCACCTCGTTAGCCAATCACCGTGCGTCAAATGTCACCTGCGGCTGACACCAGCGGGTGTGTTCTTTGCAACCCATATTCATTC
Scaffold1058:129661-129885	Scaffold1058	129661	129885	WHL22.19877	SPU_009167	CCTCTCCCCACCCTCCCCCACAAGGACAGTTGATTTGTCTGAACTCACCTTGCTTCTCTCCTGATCTTCATATGATCAAATATCTACATGGCCCTCATAGTCCTTCATCTATGACTCTCACCCTCCCAACCAATCCTCTTTCCCTAGCCCAGTAACATAACTATTTTATTGAGTGACTACCCCACCCTATCCATCCCCTCTCCCCCCTTATTATTTTGAGACTT	0	NW_022145603.1:26558228-26558452	NW_022145603.1	26558228	26558452	LOC752848	0	cctctccccaccCTCCCCCACAAGGACAGTTGATTTGTCTGAACTCACCTTGCTTCTCTCCTGATCTTCATATGATCAAATATCTACATGGCCCTCATAGTCCTTCATCTATGACTCTCACCCTCCCAACCAATCCTCTTTCCCTAGCCCAGTAACATAACTATTTTATTGAGTGACTACCCCACCCTATccatcccctctccccccttATTATTTTGAGACTT
Scaffold1058:159666-159924	Scaffold1058	159666	159924	WHL22.19840	N/A	GCCTCTTTTGGTGTTACTTGATATATGGATATACTCTGCCTCAGCTTAATGCAGTATAGACTATACAGTGTCAGTGACCTTCCTTTAGTTTAAAAGTGTCTTCAATTCATCAGTTGCACCATTGTTGAGATACCATTCACCATTCGACTTACAAAGAAATAATCCACTTGGACTTAACTTCTAATACCACCCAAATACCCAACTCATCAATGGCCGGGAACAAGAGGAAAGTGGTAATAAAGGACCTACTGGAGGACG	0	N/A	N/A	N/A	N/A	N/A	N/A	N/A
Scaffold1058:193206-193567	Scaffold1058	193206	193567	WHL22.19840	N/A	GGGGATTCCCCTTGACATCACTTCTATATAGTCTTTTGTGCAAGACCTATTAAATTTACCTCCACCTCTCCAGCGTGCAACAAATTTATAACCTAGGCCTAGGCTACAACCGAATCGGGAGACAAAATTCAAGTAGACTATTCAATAAATCTTCATGTAGCTTTCTCCAAGTTGAATTATTTTGCCTCCTAAATATAATGATGCAGTTTAATTGATACTTTAGTAGTAGGCTATATATTTGTTGCAGGTGGAGAAGTGGAGATATTAAATAGGTCTTGCAAATAAGACTATTTCGAAGTGACGTCAATGGGGGGGGGGGGGGGGGGGTGCTTGGGATGCTGCACGATCACATTGTGTAAAC	0	NW_022145603.1:26629094-26629451	NW_022145603.1	26629094	26629451	LOC115925540	0	GGGGATTCCCCTTGACATCACTTCTACATAGTCTTTTGTGCAAGACCTATTAAATTTACCTCCACCTCTCCAGCGTGCAACAAATTTATAACCTAGGCCTAGGCTACAACCGAATCGGGAGACAAAATTCAAGTAGACTATTCAATAAATCTTCATGTAGCTTTCTCCAAGTTGAATTATTTTGCCTTCTAAATATAATGATGCAGTTTAATTGATACTTTAGTAGTAGGCTATATATTTGTTGCAGGTGGAGAAGTGGAGATATTAAATAGGTCTTGCAAATAAGACTATTTCGAAGTGAcgtcaatgggggggggggggggtgcttgggATGCTGCACGATCACATTGTGTAAAC
Scaffold1058:206164-206444	Scaffold1058	206164	206444	WHL22.20446	SPU_022172	CTGTATCTATCTATATGACCCATCGACAAATGCACCCCTCTCCTCTCTCTCTCTTTCTCATAACCCTCTCCTCTCTCTCTCTTCTTACCTTAATGTTAATAGGAATGTCCCTTCCGAGAGCCTTATAAGCCTCGATCACATTGATCCAAGCCAGGACCGGTCCCTTATCATCCGTTGCTCCCTACCCATTTCTATCTCTCTCACTCTCTCCCTTTATATGCTCTCTCTTTCTCTCTTCTTACCTTAATGTTAATAGGAATGTCCCTTCCGAGAGCCTCAT	0	NW_022145603.1:26643433-26643867	NW_022145603.1	26643433	26643867	LOC594228	0	ctgtatctatctATATGACCCATCGACAAATGcacccctctcctctctctctctttctcataaccctctcctctctctctcttcttaccTTAATGTTAATAGGAATGTCCCTTCCGAGAGCCTTATAAGCCTCGATCACATTGATCCAAGCCAGGACCGGTCCCTTATCATCCGTTGCTCCCTAccccgttctctctctctcactctctccctttatatgctctctctttctctcttcttacCCTAATGTTAATAGGAATGTCCCTTCCGAGAGCCTTGTATGCCTCGATCACATTGATCCAAGCCAGGACCGGTCCCTTATCATCTGTTGCTCCCTacccctttctatctctctcactctctccctttatatgctctctctttctctcttcttacCCT…
Scaffold1058:209757-210157	Scaffold1058	209757	210157	WHL22.20446	SPU_022172	TGTAGCTGAAACAAATTAAATAGAAAAATCATCTCATTTAAAGGCTGTCTGTACTAGTTTGGCTAGGAGGGATTAGACCACCCAGGAAGGTCACTGACAGGTGGCTTTCTCATTAACTCGGCTCTCAATTATTGTCTTTCAAAATAAATTGGACAGTGCCAAGGATTTATTCAACTAAGGCCAGGAATAATAGCTTTGTTGTTTGTTTCTTTTGTCCTTTTGTTTGTTAAATCTCCAATATGGGCAACACCTTCTCTCTCAAATAGTTTCCCTATTGATCAGCACCTCAACACATGAATTTGTAATGGCTTATGATTTTAAATAAAGGATGTGTTCCGCTTGAGCTGGGCGCGAGGCCTATTAAAGTCTACTAAAGCACGACGCCAGGGATTGGGAGGCC	0	NW_022145603.1:26647676-26648078	NW_022145603.1	26647676	26648078	LOC594228	0	TGTAGCTGgaaaaattaaatagaaaaaaaatctcatttaAAGGCCATGATCTGTACTAgattggctaggagggattagaccacccaggaaggtcactgacaggtggctttctcattaactcggctctcaattattgtctttcaaaataaattggaCAGTGCCAAGGCTTTCTACAACTAAGGCCAGGAATAATAGCtttgttgtttgtttcttttgtccTTTTGTTTGTTAAATCTCCAATATGGGCAACACCTTCTCTCTCAAATAGTTTCCCTATTGATCAGCACCTCAACACATGAATTTGTAATGCCTTATGATTTCAAATAAAGGATGTGTTACGCTTGAGCTGGGCGCGAGGCCTATTAAAGTCTACTAAAGCACGACGCCAGGGATTGGGAG…
Scaffold1058:216242-216740	Scaffold1058	216242	216740	WHL22.20446	SPU_022172	TAATCGTAGTAGCTTGTACAGCGACTTGTTCCAAAAGTGTAAAAACTAAAAGAGAAAGAGAATTTCGATTAACACGTAACGGTGATGGGATGGGCAGTTCTGCGTTGGCACGCAGTGAACAGTGAACGCATGCAGTGAACAGTGAAATGTCAGCTGACTTGTAGCATATCATGTGACCTGTTTATGGAAAGCTGCATTGTATTCAATTTGATAATCGAATTTCATACATTTTATCACTTAAACATCTGAACATTCCGAATTCTTGCAGGCCAAATATATAAGAAATAATTCAAATTAATCCTATGCTAAACAAAAATTAAATTGGATAAGAGAAATTTCAATGGCAGTGCATTTAGACCTATATATTTTAACAAAATAAATATGCGGCAGTCCAACGCA…	0	NW_022145603.1:26649581-26650089	NW_022145603.1	26649581	26650089	LOC594228	0	TAATCGTAGTAGCTTGTACAGCGACTTGTTCCAAAAGTGTAAAaactaaaagagaaagagaatttcgATTAACACGTAACGGTGATGGGATGGGCAGTTCTGCGTTGGCACGCAGTGAACAGTGAACGCATGCAGTGAACAGTGAAATGTCAGCTGACTTGTAGCATATCATGTGACCTGTTTATGGAAAGCTGCAttgtaataattgtattcaATTTGATAATCGAATTTCATACAATTTTATCACTTAAATATCTGAACATTCCGAATTCTTGCAGGCTAAATATATAAGAAATAATTCTAATTAATCCTAtgctaaacaaaaattaaattggaTAAGAGAAATTTCAATGGCAGTGCATTTAGACCtatatattttaacaaaataaatatgcgGCA…
Scaffold1058:255873-256072	Scaffold1058	255873	256072	WHL22.20030	SPU_009166	AACATAGGCCGGCTAGCATATGGGTACAGCGATATCGAGCTCTCAACTAGGGGTTCATAATAGCACGCGAAATCTTTGACCGCTCTGACCTCATGACGTCACGCGTCATGGCAACAGGACCTCTCAAAAAAGGGGGTGCTACGATAGACCGCGCTATCTCACTGCGGTGTGAATCCGGCGAATGCCAATGGGCGGACTG	2723	NW_022145603.1:26675216-26675415	NW_022145603.1	26675216	26675415	LOC105437904	6845	AACATAGGCCGGCTAGCATATGGGTACAGCGATATCGAGCTCTCAACTAGGGGTTCATAATAGCACGCGAAATCTTTGACCGCTCTGACCTCATGACGTCACGCGTCATGGCAACAGGACCtctcaaaaaagggggtgctacgatagaccgcgctatctcactgCGGTGTGAATCCGGCGAATGCCAATGGGCGGACTG
Scaffold1058:260713-261039	Scaffold1058	260713	261039	WHL22.20030	SPU_009166	CTCCCTCCCTGCACTCACAGTAGCTGCATTACCCCTGGCCTCAATTTTAGATGTAGCAGACGGCATCTGATCTACTGAGCATGCTCAGTAGAAAGAAACCATGGTACAATCCATGGTCTAAGATTGTACCATGGTCTAAGATTGTACCATGGTTTAAACCCCCAAGGGGTTTTGTACCATGGTTTAAACCCATGGTACAAAGGAAACAATCGTTGGTGAATCAGAGAGAGGTAAACCCCCTGGGGGTTTAATCCATGGTCTCAAAAACCTAGGGGGGGGGGGTTAAACTCCCAGGGGGTTTTGTACCACTGTTGTGAATTCGGGCC	0	NW_022145603.1:26680056-26680382	NW_022145603.1	26680056	26680382	LOC105437904	1878	CTCCCTCCCTGCACTCACAGTAGCTGCATTACCCCTGGCCTCAATTTTAGATGTAGCAGACGGCATCTGATCTACTGAGCATGCTCAGTAGAAAGAAACCATGGTACAATCCATGGTCTAAGATTGTACCATGGTCTAAGATTGTACCATGGTTTAAACCCCCAAGGGGTTTTGTACCATGGTTTAAACCCATGGTACAAAGGAAACAATCGTTGGTGAATCAGAGAGAGGTAAACCCCCTGGGGGTTTAATCCATGGTCTCAAAaacctagggggggggggttaaactcCCAGGGGGTTTTGTACCActgttgtgaattcgggcc
Scaffold1058:267417-267776	Scaffold1058	267417	267776	WHL22.20030	SPU_009166	TGAAACATATTACGAAAATGATCAGTAAATACATAAGGATGCTACATAACTAATGTTACGTAGTCCATTGCATTGCACAACGCAAGTTCAGACAAGCAGATGACGTATCGTGACGTCATATAATCATGTTTATTCATGTTCATCCAGCCTAACACCTTCATACGCTACCGATAGAAACGTGCGAAATGCATGCCGGGCAGGCGTAGTAAAGATGACGTAATGGTATCGAAATACAACAAATGATATTCATACCAAATAGCGTAGTCTATTACGTGGAAGCTCTTTGTCCTTGTCTGGGAGGACAAGCTCTTTCAACATCCCCATAGAAAAAAATAGACTGGGGCTGCATGTAGTCTCAT	1835	NW_022145603.1:26694152-26694511	NW_022145603.1	26694152	26694511	LOC100890582	2992	tgaaaCATATTACGAAAATGATCAGTAAATACATAAGGATGCTACATAACTAATGTTACGTAGTCCATTGCATTGCACAACGCAAGTTCAGACAAGCAGATGACGTATCGTGACGtcatataatcatgtttattcatgttcatccAGCCTAACACCTTCATACGCTACCGATAGAAACGTGCGAAATGCATGCCGGGCAGGCGTAGTaaagatgacgtaatggtatcgaaatacaACAAATGATATTCATACCAAATAGCGTAGTCTATTACGTGGaagctctttgtccttgtctgggaggacaagctcTTTCAACATCCCCATAGAAAAAAATAGACTGGGGCTGcatgtagtctcat
Scaffold1058:278731-279171	Scaffold1058	278731	279171	WHL22.20117	SPU_005792	GTTGAATGAAAAGGGAAAAACGGAGAAATACAATGTTTAGCATCCCCTAAGAAGCCGAGGTTCAGATAAGCTTATATATATGCATAAAGTTTGCTTTTTCCTTCCCTGACACAGGTGAAAAATACTTACAACACAAATAATAATAATAATAATTACTTCTTCTATTTTTGGCTCAAACTGGGCATTGAAATTGTCATAAGTAAAAGGTCAACGGAATCCCACTGAAACGTAACATGTGTATCTAATATCAACACGCATTTCAATAGGATGTCGGCGAACCTGTTCTTAATTATGACGGTTTCGTGACACAATATGAAGAGGTAAACCGTGGCAGTGTATCTCAATATCATGTAAATGAATGGCAACTGCGCCCATATAGAAAGGGTAACTCTCCCAACA…	0	NW_022145603.1:26705735-26706569	NW_022145603.1	26705735	26706569	LOC100890582	0	gttgaatgaaaaggaaaaaacggAGAAATACAATGTTTAGCATCCCCTAAGAAGCCGAGGTTCAGATAAGCTTATATATACATCAAGTTTGCTTTTTCCTTCCCTGACACAGGTGAAAAATACTTAcaacacaaataataataataataattacttctTCTATTTTTGGCTCAAACTGGGCATTGAAATTGTCATAAGTAAAAGGTCAATGGAATCCCATTGAAACGTAACATGTGTATCTAATATCAACACGCATTTCAATAGGATGTCGGCGAACCTGTTCTTaattatgacggtttcgtgacaCAATGCCCTGGctgttaaagggatccagtaactttgtctcagattctgaaacaaaattctggatttagctcatgacgcaatgataattataaa…
Scaffold1058:363173-363245	Scaffold1058	363173	363245	WHL22.20424	SPU_010273	GATGTGAAAGACTAGTCGACGCACCCTTTCGAGAAAAGACCCCCTCATCCCGAAAGGGTGAGTGAAGACGGT	4984	NW_022145609.1:32381650-32381722	NW_022145609.1	32381650	32381722	LOC588509	26115	ACCGTCTTCACTCACCCTTTCGGGATGAGGGggtcttttctcgaaagggtgcgtcgactagtctttcacaTC
Scaffold1058:366190-366539	Scaffold1058	366190	366539	WHL22.20424	SPU_010273	AAGAGAGAAAGAGAAATAGAGAGAGACAGGGGGTAGAAGAGGGGGACATGAGAGACAGAAAGCGGACGGACAGACAGGAAGAAAAGGGACTTAATAGTTATAACGGAAAACCTTTTCAAGAAAGAACAGATGTTTTTTTATCATGTGAAAAATAAAGAGCCGTGTTGCAAATTAATGTGACTAAGTGTTTTGTCAATAATTTTGAAAGAAATGTGCCAATCAGAAAGCAATTAACACTGTTTGAAAACGACTCTGCTCCGGATATATATCAGTTAAATCCTCCTAGACGTGAATGGGGGCTGAATCACAGTTCTCTGGGCTGAGTAGGGCTAATTTCCTATTCAGTGCC	1690	NW_022145595.1:1052309-1052649	NW_022145595.1	1052309	1052649	LOC100890780	1370	aagagagaaagagaaatagagagagacagggggtagaagagggggacagagagacagaaagcgGACGGACAGACAGGAAGAAAAGGGATTTAATAGAAAACCTTTTCAAGAAAGAacagatgttttttttatcatgtgAAAAATAAAGAGCCGTGTTGCAAATTAATGTGACTAAGTGTTTTGTcaataattttgaaagaaatgtgcCAATCAGAAAGCAATTAACACAGTTTGAAAACGACTCTGCTCCGGATATATATCAGTTAAATCCTCCTAGACGTGAATGGGGGCTGAATCACAGTTCTCTGGGCTGAGTAGGGCTAATTTCCTATTCAGTGCC
Scaffold1058:367868-368416	Scaffold1058	367868	368416	WHL22.20424	SPU_010273	ACCCATTGACAATTGCGATTCAGGAGCCTTGTAGTGACAGAGAGAGGAGGGTTTATAATTATATCATAAACAAACTGCAACCAAAAATATGGGCGAATCAATGTCATCTCAGCTCAGACGTCTGGTTTGCTGGTTTACTCGCACTCTTCTTGCGCAACGCAACCAAGCAAAAACCATTCTGAATCTGATTCGATCCGGTTCTTATTCTCCGCCTCCTGCACTCGATCTCCATTGTGACGTGCCTGTTGCCACGCTGTAGGCACGAACGCTGATTGGCTGTAGTTTCCCAAGAGGGCAGACCGCAGTATTATTGACATGGATATTCATGAGCGAACGGAGGAGCATGCTTACTTTGTTTACGCGAACAGCAGCTGATCTGATGAAATACTCAGAGGATAA…	0	NW_022145595.1:1053978-1054525	NW_022145595.1	1053978	1054525	LOC100890780	0	acccattgaCAATTGCGATTCAGGAGCCTTGTagtgacagagagaggagggtttataattatatcataaacAAACTGCAACCAAAAATATGGCGAATCAATGTCATCTCAGCTCAGACGTCTGGTTTGCTGGTTTACTCGCACTCTTCTTGCGCAACGCAACCAAGCAAAAACCATTCTGAATCTGATTCGATCCGGTTCTTATTCTCCGCCTCCTGCACTCGATCTCCATTGTGACGTGCCTGTTGCCACGCTGTAGGCACGAACGCTGATTGGCTGTAGTTTCCCAAGAGGGCAGACCGCAGTATTATTGACATGGATATTCATGAGCGAACGGAGGAGCATGCTTACTTTGTTTACGCGAACAGCAGCTGATCTGATGAAATACTCAGAGGATAAa…
Scaffold1058:370737-371197	Scaffold1058	370737	371197	WHL22.20424	SPU_010273	AAGGGATGAAGTGTCACATTACTGTTGAGCATGTGAGGCTTGAAAACCACCGCGAACTTTTCATGTACTCTCTTCCTCTTTGCCTATGCGTCCATTTTGTTTACAACCGCTCGCTCGCTCGGTGATAACTATACGCTAGTGTCGGTGCTTGCAGGAGCTTGGAGCTAGAGACGGACTGTGGCGTGCAGGCGTCCCTGGGATATACAGGCGGAGAATAGAACATAAATTATGCTAATGAAGGCCTTTTCTCCTCATGTTGGGGAGTGTTTCTCAGGCAACCAGATGCAAATGAAAAGTGACGTCTCGACGATGTGAAAATGACATTGACATGGGAAGAGAGAGAGGAAGAAAGAGAGAGAGAGAGAGAGAGAGATATTATATACAGGCTGTAGATAATTA…	0	NW_022145595.1:1061019-1061475	NW_022145595.1	1061019	1061475	LOC100890780	0	ATGGGATGAAGTGTCACATTACTGTTGAGCATGTGAGGCTTGAAAACCACCGCGGACTTTTCATGTACTCTCTTCCTCTTTGCCTATGCGTCCATTTTGTTTACAACCGCTCGCTCGCTCGGTGATAACTATACGCTGGTGTCGGTGCTTGCAGGAGCTTGGAGCTAGAGACGGACTGTGGCGTGCAGGCGTCCCTGGGATATACAGGCGGAGAATAGAACATAAATTATGCTAATGAAGGCCTTTTCTCCTCATGTTGGGGAGTGTTTCTCAGGCAACCAGATGCAAATGAAAAGTGACGTCTCGACGATGTGAAAATGACATTGAcatgggaagagagagaggaagaaagagagagagagagatatatattatatacaggctgtagataattatatt…
Scaffold106:100586-100880	Scaffold106	100586	100880	WHL22.21131	SPU_023922	TGGCACTGATCATAATTTTGCTTGTAAAGCCCCGTAAACATCCTGAATAAGTGCTTACAATTCCCTGAACTACAGTACAGACTCTTAGCAGGTTGATGGAAGCGCAATGTGTTTGTATGACGCGTTGATTTCCGCTATGGGCGTGACCCGGGAAATTGATTGCTGTCAATTCGGGTTAATCGACTTTCACAAAAATTAGAAAGGTCATGAAGAGAACAATGCCGTAGGATATATGTTCATTTAAGGCCTTAGGTTAATTTGAGTTGCATGATTGCGCGAGAAAAAAAAAACAAT	3131	NW_022145602.1:9859863-9860156	NW_022145602.1	9859863	9860156	LOC583431	8190	atattttttttttctcgcgcAATCATGCAACTCAAATTAACCTAAGGCCTTAAATGAACATATATCCTACGGCATTGTTCTCTTCATGACCTTTCTAATTTTTGTGAAAGTCGATTAACCCGAATTGACAGCAATCAATTTCCCGGGTCACGCCCATAACGGAAATCAACGCGTCATATAAACACATTGCGTTTCCATTAACCTGCTAAGAGCCTGTACTGTAGTTGAGGGAATTTTAAATACTAATTCAGGATGTTTACGGGACACTACAAGCAAAATTATGATCAGTGCCA
Scaffold106:102888-103194	Scaffold106	102888	103194	WHL22.21131	SPU_023922	ATGCGACGCACAGCCGGCATCCGAGATCGTCACCTATGAATGGTTCGTCGACGGACGCCAACAATTCCCGGAGCACGATGTCCGCTTCGACGGCGACACTCATATCCTAGTCGATGACGAATACGAGCACCACCACGGGTATCTTACCTTTGATAGCTTGAATATGACTGATAATGGGACTGTTATCACTTGTAAAGCGTGGACGACGACCAACATAACCAACGAGGTTTCTATCGTGTTAATCATTACAGAAGACAAAGAAGAGGCATCATCCTGGACCAAGGAATCGGTTGTTTTGATAGGGTG	5433	NW_022145602.1:9857514-9857820	NW_022145602.1	9857514	9857820	LOC753460	8871	CACCCTATCAAAACAACCGATTCCTTGGTCCAGGATGATgcctcttctttgtcttctgtAATGATTAACACGATAGAAACCTCGTTGGTTATGTTGGTCGTCGTCCACGCTTTACAAGTGATAACAGTCCCATTATCAGTCATATTCAAGCTATCAAAGGTAAGATACCCGTGGTGGTGCTCGTATTCGTCATCGACTAGGATATGAGTGTCGCCGTCGAAGCGGACATCGTGCTCCGGGAATTGTTGGCGTCCGTCGACGAACCATTCATAGGTGACGATCTCGGATGCCGGCTGTGCGTCGCAT
Scaffold106:23222-23407	Scaffold106	23222	23407	WHL22.20422	SPU_008429	ACAGAATACGGTACAAACAGTGATAATGCACGCGGCTTCAAATCTGTACACTACAGTTCTGTAGCCATTTAAAGCCCCATGTTTACCATCATCCCAAACAATAATCGTAGGTGAACAAAGGAAGGCAATTCAGTGCAATGCATAATGACGGAGTAATAATGACTAGGGCTTAACTGTATTCAGTG	0	NW_022145602.1:9932382-9932570	NW_022145602.1	9932382	9932570	LOC100889700	5198	CACTGAATACAGTTTAAAGCCCTAGTCATTTATTACACCGTCATTATACATTGCACTGAATTGCCTTCCTTTGTTCACCTACGATTATTGTTTGGGATGATGGTAAACATGGGGCTTTAAATTGCTATAGAACTGTAGTGTACAGATTTGAAGCCGTGTGCATTATCATTGTTGGAACCGTATTCAGT
Scaffold106:233900-234183	Scaffold106	233900	234183	WHL22.20701	SPU_016454	TGCTGTACGGCAAAGCGTTCATAAAAAACTGCACGTGTACAGGCATAATTCCAAACCATGTCGGGTCTCTGCTGGAGAAACTTTTTTCAAGTCTTTATTTCAGCAAACTGCGGCAAACCAAACTAATCATCCCATCCTCGTCGCCAATATTATGTTCTGTCAATGTTCAAGGTTGATGTTCAGCCAAATAAAGATGACAAATAAAGACGTATTCGTAACTTTAAAACTACATGGTGGTAGCATGGACTTTATTCGATGAAGGCATCGATGGAAACTGCGCGCG	7652	NW_022145600.1:5864319-5864603	NW_022145600.1	5864319	5864603	LOC105445041	0	CGCGCGCAGTTTCCATCGATGCCTTCATCGAATAAAGTCCATGCTACCACCATGTAGTTTTAAAGTTACGAATACGTCTttatttgtcatctttattTGGCTGAACATCAACCTTGAACATTGACAGAACATAACATTTGGCGACGAGGATGGGATGATTAGTTTGGTTTGCCGCAGTTTGCTGAAATAAAGACTTGAAAAAAGTTTCTCCAGCAGAGACCCGACATGGTTTGGAATTATGCCTGTACACGTGCAGTTTTTTATGAACGCTTTGCCGTACAGCA
Scaffold106:235309-235606	Scaffold106	235309	235606	WHL22.20701	SPU_016454	GTGGTTCTTAACTGGTGAACCTCTTTATCTTCACTACCTTTGTCACTGGAGTGCAATTGTTCAACATCTCTATTAGCTATCTCCATGGCCATGGCTACTTTCAACGCTTTATCAAATGTAAGCTCTGATTCACTAAGAAGCTTTCTTTGTGTAGCTTTGTCCTTACAACCAACTACAAGGCGATCCCTAAGCATGCTATTCAATTCTTTAAACTTGCATCCTTCACTCAACTGGCGTAAACGAGCAACAAATTGCGGGATTGTTTCACGTGATTCTTGAACACAAGTATAAAACTTA	6229	NW_022145614.1:19942847-19943144	NW_022145614.1	19942847	19943144	LOC100889068	5547	TAAGTTTTATACTTGTGTTCAAGAATCACGTGAAACAATCCCGCAATTTGTTGCTCGTTTACGCCAGTTGAGTGAAGGATGCAAGTTTAAAGAATTGAATAGCATGCTTAGGGATCGCCTTGTAGTTGGTTGTAAGGACAAAGCTACACAAAGAAAGCTTCTTAGTGAATCAGAGCTTACATTTGATAAAGCGTTGAAAGTAGCCATGGCCATGGAGATAGCTAATAGAGATGTTGAACAATTGCACTCCAGTGACAAAGGTAGTGAAGATAAAGAGGTTCACCAGTTAAGAACCAC
Scaffold106:265887-266291	Scaffold106	265887	266291	WHL22.20723	SPU_002076	TGCCAAGTTTGGTCGTAATCTACTTTGTGCGTTCTGAAGAAGATTAACATGTTTTTAGCCTTATATTTGATTCCCTCCATCTTTACTCTCAGGGCCTGCCAATTCAGCTGATTTGTGTCCGGCCCCCTTCGATCTTCTCGCAAAGAATTGCTGAAAGATATAAACATAAACAGAACAAAAATATTTAGAATTATTAGTGATGCTTATCAGAATTGCCAAGAGCAGCATGACATGTTACTGTTGGCTCAAACAACACGATGCTCAGAAATAGAATGATAGTAAAGTTCTCTGGATGCTGCCCATAAAAAAGCCATAAAAGAAGAGCTTCTTGACAGGTAACAGAGTCATGTGAAAGACTTAGATCAGGGCTTAAATTAATCCAAGGCCATGGCCGTGGGT…	0	NW_022145594.1:44006534-44006938	NW_022145594.1	44006534	44006938	LOC115921382	0	agggcacccacggccatggccttggattaatttaagccctgatCTAAGTCTTTCACATGACTCTGTTACCTGTCAAGAAGCTCTTCTTTTATGGCTTTTTTATGGGCAGCATCCAGAGAACTTTACTATCATTCTATTTCTGAGCATCGTGTTGTTTGAGCCAACAGTAACATGTCATGCTGCTCTTGGCAATTCTGATAAGCATCACTAATAattctaaatatttttgttctgtttatGTTTATATCTTTCAGCAATTCTTTGCGAGAAGATCGAAGGGGGCCGGACACAAATCAGCTGAATTGGCAGGCCCTGAGAGTAAAGATGGAGGGAATCAAATATAAGGCTAAAAACATGTTAATCTTCTTCAGAACGCACAAAGTAGATTACGACCAAACT…
Scaffold106:270749-271143	Scaffold106	270749	271143	WHL22.20723	SPU_002076	CTAATCACCTCCCGGAAGTACAGGCCAGGTATCAAAAGAAACAGTTGCACCGTTGGTTTTAGGTAAAATGTTAGCATTAATTATGGTGACATTGATTACTTTTTGAAATGTTTTACAGAATTTTATAATGAGGTATTTTGTATAAACGATCAAGTCGATCATTGTGTTTGCAAAACAGCATACTACCATACTGTTATTTCCAAATTTGCCCTGAGCAATACACTCCTCTGTACTGATCAGTTTACTGGTGCAAATAATCCTAATATTTCATTGGTAAAGAAAGAGAGAGAAGAAACCTGTGTCATCAATATATTGAAGATTGTAGAGGTATGCGTGTGGATGGATGTCAGGTTAAATGATGTATTTGTTGCACATTAAACTTATCAGTCTGGCG	0	NW_022145598.1:26109971-26110365	NW_022145598.1	26109971	26110365	LOC105440729	0	CGCCAGACTGATAAGTTTAATGTGCAACAAATACATCATTTAACCTGACATCCATCCACACGCATACCTCTACAATCTTCAATATATTGATGACACAggtttcttctctctctttctttaccaATGAAATATTAGGATTATTTGCACCAGTAAACTGATCAGTACAGAGGAGTGTATTGCTCAGGGCAAATTTGGAAATAACAGTATGGTAGTATGCTGTTTTGCAAACACAATGATCGACTTGATCGTTTATACAAAATACCTCATTATAAAATTCtgtaaaacatttcaaaaagtaATCAATGTCACCATAATTAATGCTAACATTTTACCTAAAACCAACGGTGCAACTGTTTCTTTTGATACCTGGCCTGTACTTCCGGGAGGTGATTAG
Scaffold106:290535-290781	Scaffold106	290535	290781	WHL22.20723	SPU_002076	CCACACAAGCGTCCAGCTCCTCTTCAAACATTTCATTCACGAGGTAAACCATGTTAATAAAGCGAAAGTATCGCTCCTCTGTGAGCTTGGTGATGGCTTCGTCGATATGCTTGTCTACCCTGTCTGGCCACTCCAGCCACATACAGTCATCGTGGTCTTTCTGGCTCGGATAGTTGAGTCTGCATCCTGTGCACGACCGATGCACCGCCTCGTTTAAAAGACCCGACAGTGCTTTGACGGCCATGA	13461	NW_022145600.1:11043272-11043518	NW_022145600.1	11043272	11043518	LOC105437261	0	CCACACAAGCGTCCAGCTCCTcttcaaacatttcattcaCGAGGTAAACCATGTTAATAAAGCGAAAGTATCGCTCCTCTGTGAGCTTGGTGATGGCTTCGTCGATATGCTTGTCTACCCTGTCTGGCCACTCCAGCCACATACAGTCATCGTGGTCTTTCTGGCTCGGATAGTTGAGTCTGCATCCTGTGCACGACCGATGCACCGCCTCGTTTAAAAGACCCGACAGTGCTTTGACGGCCATGA
Scaffold106:296977-297313	Scaffold106	296977	297313	WHL22.20686	SPU_005155	GGTAGAAAAAATATATGAAAAATATATTTTCTCACTATTTCTACTCTCTAAAAAAATAGATTGAAAATAGCCTAGTCCAGAAATAGATTAAAAATAGAAGAAAAAATAGCAAAAAAATATATGTTTAGGTTATATGTTTTGGATCGCTTTAAAAATAGCGAAGAAATAGTAAAATATACAGAAAATATACGAATAAATAGTCTAAAACTGTATAAAAAATATATGAAAAATATATTTTCTCACTATTTTGTTACCCCAAGAATTAGCAAGAAAATAGGAAGGAAATATATGGGAAATAGAAAAAAATATCTTAAAAATATATCCAGCTTAGATGTT	15557	NW_022145600.1:11032944-11033280	NW_022145600.1	11032944	11033280	LOC115924019	0	ggtagaaaaaatatatgaaaaatatattttctcactatttctactctctaaaaaaatagATTGAAAATAGCCTAGTCcagaaatagattaaaaatagaagaaaaaatagcaaaaaaatatatgtttaggtTATATGTTTTGGAACGCTTTAAAAATAGCGAAGAAATAGtaaaatatacagaaaatatACGAATAAATAGTCTAAAACTgtataaaaaatacatgaaaaatatattttctcactATTTTGTTACCCCAAGAATTAGCAAGAAAATAGGAAGGAAATATAtgggaaatagaaaaaaatatcttaaaaatatATCCAGCTTAGATGTT
Scaffold106:300647-300940	Scaffold106	300647	300940	WHL22.20686	SPU_005155	GTATTTTGTCTCGTCGGCAACGGCTTCTTTTTAAAGAAAAATCCCTGTTACGTCATTCTCATGAATATACGAGACAGTCAAAGGGACCTCCTTCTTAGTTGTATCTTTCATCCCTTTGTCAACAAAGGCGGGTTTTATTTGACTTCATGATCTGAAAGCGTGTGGCTTTTCTTCTGTACGTCGACAAGATTTAACATTATTTTATAAAAGGAGGGGGGATACAAATCCTAGGACTTTGAACCGGATCACGGACATTGTGATTCATAGGCATCATTCAATACAAATATTGGACT	11930	NW_022145600.1:11052093-11052381	NW_022145600.1	11052093	11052381	LOC105437871	1613	GTATTTTGTCTTGTCGGCAACggcttctttttaaagaaaaatcccTGTTACGTCATTCTCATGAAAATACGAGACAGTCAAAGGGACCTCCTTCCTAGTTGTATCTTTCATCCCTTTGTCAACAAAGGCAGGTTTTATTTGACTTCATGATCTGAAAGCGTGGGGCTTTTCTTCTGTACGTCGACAagatttaacatttataaaaggAGGGGGATACAAATCCTAGGACTTTGAACCGGATCACACACACTGTGATTCATAGACAtcattcaatacaaatattggACT
Scaffold106:304223-304563	Scaffold106	304223	304563	WHL22.20686	SPU_005155	AACAATAATGATAATGATAATAATAATAATATTAGTAATAATGATTATAGACAAAATTACAGTAATATTTTGTTATTAAAAGAACGTGCCGAGGGTCTTTGTATAAGCCACAGAGCTATATACTACTAACAGTCTTAATATAGATCTATGGTATAAGCATACTACATGTATAACTATATGCATACTATATACTACGATTAAGTTAATGGACCCGAACCGTATTCGCCATTTTATACACGCATTAGTGCCTCCATATCGCGTCAGTTGCTTAGCAACCATGGTGGATTTCACCTTGACTTCACTTCAATAGGAATATTACCCTATCTGCATTTATACCCGC	8307	NW_022145600.1:11055604-11055942	NW_022145600.1	11055604	11055942	LOC105437871	0	aataataatgataataataataataataatattagtaataatgattatagACAAAGTTAcagtaatattttgttattaaaagaaCATGTCGAGGGTCTTTGTATAAGCCATAGAGCTATATACTACTAACAGTCTTAATATAGATCTATGGTATAagcatactacatgtataactatatGCATACTATACTACGATTTAATTTAATGGGCTCGAACCGTATTCGCCATTTTATACACGCATTAGTGCCTCCATATCGCGTCAGTTGCTTAGCAACCATGGTGGATTTCACCTTGACTTCACTTCAATAGGAATATACCCTATCTGCATTTATACCCGC
Scaffold106:307534-307916	Scaffold106	307534	307916	WHL22.20686	SPU_005155	TGCAATATATGCCACACGGCGTTGTAGATTTTATACCGATGAAAATGCTGACAAGGAAGTTCTGTAGAGGTCCACTTGGGGCATTACATTTCATAGCAAAGATGCTTAAAGCGCTCGAACAATCCTCATGTATAGGGACTTTTAGATTTGCGTGGACTGATACGTGTGACGTCAATTCAAGGCAGTGCATTAAAAGGGCGTCGACCGTAGCAATCCCCATTGTCTTCGTGCGAAACTAAAAGTCCATAATAGCTCAGATACACCACCTAACCACAATGGTGTATTGATCAAATGTATGATCGACCGTCAGACCACGTACAGCCATCACGTGAAATAATGGGTGTTTTTCGGTTATTGAGTAAATGTATTATACTAGATGGAT	4954	NW_022145600.1:11058923-11059306	NW_022145600.1	11058923	11059306	LOC105437871	0	TGCAATATATGCCACACGGCGTTGTAGATTTTATACCGATGAAAATGCTGACAAGGAAGTTCTGTAGAGGTCCACTTGGGGCATTACATTTCATAGCAAAGATGCTTAAAGCGCTCGAACAATCCTCATgtatagggacttttagatttgcgtggactgatacgtgtgacgtcaattcaaggcagtgcattaaaagggcgtcgaccgtagcaatccccattgtcttcgtgcgaaacTAAAAGTCCATAATAGCTCAGATACACCACCTAACCACAATGGTGTATTGATCAAATGTATGATCGACCGTCAGACCACGTACAGCCATCACGTGAAATAATGGGTGTTTTTTCGGTTATTGAGTAAATGTATTATACTAGATGGat
Scaffold106:442693-442718	Scaffold106	442693	442718	WHL22.21209	SPU_020992	TACACTCTCCGACTTCGAGTTCGAG	0	NW_022145600.1:11161716-11161741	NW_022145600.1	11161716	11161741	LOC575294	18533	TACACTCTCCGACTTCGAGTTCGAG
Scaffold106:573054-573241	Scaffold106	573054	573241	WHL22.26374	SPU_019568	ATGCTATCAAAAAAAATTGAACAGACCGGATGCCACATCATGGCTGGTTTAAAAGCCTTACTAGATAGGGTAAAGCACTTTTTCTGTAGCGTTCTGTCCTACACTTGATTTCACGTAGCCTATTACTATGTCTCAATTGTCTTCGAGAACACTGGCTTTCAGGTAACCACTCACGAAAGTTACAGTA	3237	NW_022145594.1:24543968-24544155	NW_022145594.1	24543968	24544155	LOC115921479	1359	TACTGTAACTTTCGTGAGTGGTTACCTGAAAGCCAGTGTTCTCGAAGACAATTGAGACATAGTAATAGGCTACGTGAAATCAAGTGTAGGACAGAACGCTACAGAAAAAGTGCTTTACCCTATCTAGTAAGGCTTTTGAACCAGCCATGATGTGGCATCCGGTCTGTTCAATATTTTTTGATAGCAT
Scaffold106:576832-577016	Scaffold106	576832	577016	WHL22.26374	SPU_019568	ACTCTAGATACAATTGAGCATTCATTTTCAAGACAAAATCTGAAATGATGAGATTTTTAGATCTAGATATTTTTTCAATTTGAATTTTATTGATTTTCCTCAACTATTTTCAAGACCTCATCTCTCATTTTTCAAAATTTACCCATCGAATTTTAACAAGTTTCTTTTAATTTCTATTTCTGAG	0	NW_022145600.1:11294549-11294758	NW_022145600.1	11294549	11294758	LOC576121	0	actctagatacAATTGAGCATTCATTTTCAAGACCAGATCTGAAGTGATGaggtctagaatctagatctagactctagactattatttttattttttttcaatttgattttgattgatttttcttcaactaTTTTCAACACCTCATctctcaattttcaaaatttacctaTCGAATTTTAACaagtttcttttaatttctatttctgAG
Scaffold106:605058-605124	Scaffold106	605058	605124	WHL22.26384	N/A	AATCTGAGGATTAGTCAAAGTGTCTTGTATACTACTGCTCGTAGTGCTCAGTGGGATGGAAGCCCT	0	NW_022145600.1:11327765-11327831	NW_022145600.1	11327765	11327831	LOC100891878	0	AATCTGAGGATTAGTCAAAGTGTCTTGTATACTACTGCTCGTAGTGCTCAGTGGGATGGAAGCCCT
Scaffold106:607820-608327	Scaffold106	607820	608327	WHL22.26384	N/A	TGGTTCGATTCTAGTAAGCAGTAATGAAACAAAATTAAGCAAACTGACTATTTTTTGTTGTTCGTAGTATAAAACCTCTCGTATCGATCATTATCATCAGGTACCAGTCATTTGGCCGGTCTAGTCCTTTCGTTGTATGTATCCATCGATTGCAATGAGCATGAACCAAAGGCTTCTTTCACAGCTCAGCGATCCGAGGGTATTAGCTGCATTTTCAGCAGCTTTGTGCGAACAAATAACAGCCCTTTAAGAAGTGGCAAGTAACAAAATACATGGGGTAATATGTATCGATTGGCGAGTACAAGTCGTCTGGGGGAGTTCGGTGTGTAATTAACGGCTAGCAAAATAGCCTAGGGCGATGTGTGTGAGATGATAGGGACAATAACCAACAAGCAATTA…	0	NW_022145600.1:11328791-11329305	NW_022145600.1	11328791	11329305	LOC100891878	0	TGGTTCGATTCTAGTAAATAAGCAGTAATGAGACAAAATTAAGCAAACtgactattttttgttgttcataGTTATATAAAACCTCTCGTATCGATCATTATCATCAGGTACCAGTCATTTGGCCGGTCTAGTCCTTTCGTTGTATGTATCCATCGATTGCAATGAGCATGAACCAAAGGCTTCTTTCACAGCTCAGCGATCTGGGGGTATTAGCTGCATTTTCAGCAGCTTTGTGCGAACAAATAACAGCCCTTTAAGAAGTGGCAAGTAACAAAATACATGGGGTAATATGTATCGATTGGCGAGTACAAGTCGTCTGGGGGAGTTCGGTGTGTAATTAACGGCTAGCAAAATAGCCTAGGGCGATGTGTGTGAGATGATAGGGACAATAACCAACAA…
Scaffold106:619758-620147	Scaffold106	619758	620147	WHL22.26384	N/A	CAAATCCCTAACTGCAGGACAGAACACAACAAATAATCCTTCTTTCCAAGGACTGTGTTAGGGCATGGAGTGCTCCCCCATCCAGGTTCACCAATGCCTCCTCTCCAATGGCCTTCCGTCTATTAAAGACTGACGGAAGACCAGAGCTAAACTAAACAAGACCAAGACTTTTACTTGCAGTTTGTAGATGTATATACATGGAGTCGGGTTAACTCGGACCCGGGACAACTTGGCCCGTTGCGAATAAGGGGCCGAGTTGTCCCGGCATAATTGAATTTGTTATGAAATCTTTTACGTTTAGGGTTAGGGTTAGACTTGAGTTAAGGGTAGGGTTTAGCATTTGGGTTAGGGTTAGGGTTAAAGTTAGTGTATGCTGTGACAACTCGGCC	0	N/A	N/A	N/A	N/A	N/A	N/A	N/A
Scaffold106:622608-622708	Scaffold106	622608	622708	WHL22.26384	N/A	AGAGAAGAGAAGCTTGCTACCACGTAGAGTGTTTTCACGCTCTTTTTAACCATTGTTGTAGGTTACCGTTGTGTCAGGCGTTACGGTACGTAGTGTCGTC	0	N/A	N/A	N/A	N/A	N/A	N/A	N/A
Scaffold106:623755-624012	Scaffold106	623755	624012	WHL22.26419	SPU_019569	GTCTGCTTTGCTAGATCCCTTTTCTTTGAAAGCGCGATTAGCAATCAGGAATTGCGTTCAGTTTTTTTAATTGCTTGGGTGTGATATTCAATATGCTGTGGACTTTAGCACAATGGGTGTATGTATGCTAAGACTTTGCCCCCCTTTGTTTGATTATCATATGTTTAATCAATGGAGTAAACATGGAATGGAATTGAAAAGCACCATTCACGTATTACAAGTAGATAACAAGCCGAAGCGAAACTTGGGCAGCATTT	0	NW_022145600.1:11343278-11343535	NW_022145600.1	11343278	11343535	LOC100891878	0	GTCTGCTTTGCTAGATCCCTTTTCTTTGAAAGCGCGATTAGCAATCAGGAATTGCGTTcagtttttttaattgcttGGGTGTGATATTCAATATGCTGTGGACTTTAGCACAATGGGTGTATGTATGCTAAGACTTTGCCCCCCTTTGTTTGATTATCATATGTTTAATCAATGGAGTAAACATGGAATGGAATTGAAAAGCACCATTCACGTATTACAAGTAGATAACAAGCCGAAGCGAAACTTGGGCAGcattt
Scaffold106:669282-669775	Scaffold106	669282	669775	WHL22.27354	SPU_006898	AAATGATCAATGAATTTAGTCTGCTTCAGGTAAATCCTCTCAATTGACTACAATCTATCATATTGTTTAGTGCATGCAGGTATAAAATAATCACGAACATTATATTCCTTTGCAAATCAATTTCTTGTGGCCCTTTAATGCGAGCATATGCATGATCGACGAGAAGGCGTATCAAAAAAAAAAGTTTACCGCACGAACCTCTAACGCATGCGCAAAAGTTGTTTACGAAATTCGATTTCTGACAAGTCAAGTCACGTCACTGGATTGTGCATGCTACATGTACGAGCGAGCTAGGCTGCCCTCGCAACAAGGTTGGAAATTTGCATAACGGGGGCTCGGCTTATTAATTATTCAAGATTTAAAAACCGCAGGCCAGGCAACCACGTTGAACAACGAGTA…	0	NW_022145600.1:11377280-11377773	NW_022145600.1	11377280	11377773	LOC586779	0	AAATGATCAATGAATTTAGTCTGCTTCAGGTAAATCCTCTCAATTGACTACAATCTATCATATTGTTTAGTGCACGCAGGTATAAAATAATCACGAACATTATATTCCTTTGCAAATCAATTTCTTGTGGCCCTTTAAAGCGAGCATATGCATGATCGACGAGAAggcgtataaaaaaaaaaagtttaccgcACGAACCTCTAACGCATGCGCAAAAGTTGTTTACGAAATTCGATTTCTGACAAGTCAAGTCACGTCACTGGATTGTGCATGCTACATGTACGAGCGAGCTAGGCTGCCCTCGCAACAAGGTTGGAAATTTGCATAACGGGGGCTCGGCTTATTAATTATTCAAGATTTAAAAACCGCAGGCCAGGCAACCACGTTGAACAACGAGTA…
Scaffold106:671209-671514	Scaffold106	671209	671514	WHL22.27354	SPU_006898	GGTTGGATTACAATAATGTCAATACAGTTATGCTGATAATTTTGTGTCTGTAATTCGACATGGGCTACAAATACCTTTGTTTAGGTACAAAGTCCTTATTGTTCATAAACAATGAGATAGTGACCTACATTGTTGCCCACATGCCTACATTGTATTTGGGGGATCTGTCAAAAGGCATACAGTACAATTTGTTAAATTTATTTTCTAATGATTTATTTCTTTAATTATTTTGTTGTTGCATCAATTCTTGATTGTATTATGTGTGTATACATGCATGAAATGAAACCCACATCTTTTGTAAGGGG	0	NW_022145600.1:11379207-11379512	NW_022145600.1	11379207	11379512	LOC586779	0	GGTTGGATTACAATAATGTCAATACAGTTATGCTGATAATTTTGTGTCTGTAATTCGACATGGGCTACAAATACCTTTGTTTAGGTACAAAGTCCTTATTGTTCATAAACAATGAGATAGTGACCTACATTGTTGCCCACATGCCTACATTGTATTTGGGGGATCTGTCAAAAGGCATACAGTACAATTTGttaaatttattttctaatgatttatttctttaattattttgttgttgcatcAATTCTTGATTGTATTATGTGTGTATACATGCATGAAATGAAACCCACATCTTTTGTAAGGGG
Scaffold106:673280-673749	Scaffold106	673280	673749	WHL22.27354	SPU_006898	ACCTGTAACTAGCATTTCTAGTACTGTAGTTCATCAACTTTTCGATGATTCCAATTTTTATAGTTAACTGATTTATCCATTGTGTATTTAATGGTTAAAACATATATCCACATAATATGTCATGTACGTATGGGACGAAGGTCCTTTAACTCCAAAGTCCACGTGTGTTATTCTGTTCGTCATCGTTCCATGAGCCAGCATCGGACAGCTGGTTCAAACTGGTTTGCACTCTCTCGATCTCCTCCACGTTTTCGGCTTTGCATGAATGGCTTACATGCTTATTGTTACGTGTATAGCTAGCTAGGCTCGTACCCGTAGTACTCTTGACCGAGTGTTTTGCAATCTCCAATTGTAGGTTGTCAACATGTTTTAGGAGATTATGATTTCTTCCTTTTTTCA…	0	NW_022145600.1:11381278-11381747	NW_022145600.1	11381278	11381747	LOC586779	0	ACCTGTAACTAGCATTTCTAGTACTGTAGTTCATCAACTTTTCGATGATTCCAATTTTTATAGTTAACTGATTTATCCATTGTGTATTTAATGGTTAAAACATATATCCACATAATATGTCATGTACGTATGGGACGAAGGTCCTTTAACTCCAAAGTCCACGTGTGTTATTCTGTTCGTCATCGTTCCATGAGCCAGCATCGGACAGCTGGTTCAAACTGGTTTGCACTCTCTCGATCTCCTCCACGTTTTCGGCTTTGCATGAATGGCTTACATGCTTATTGTTACGTGTATAGCTAGCTAGGCTCGTACCCGTAGTACTCTTGACCGAGTGTTTTGCAATCTCCAATTGTAGGTTGTCAACATGTTTTAGGAGATTAtgatttcttccttttttca…
Scaffold106:674008-674549	Scaffold106	674008	674549	WHL22.27354	SPU_006898	AAGTCAACAATAACTGGACTGTCTTGCTCATTTGAATTTAACTGTCAGAGAGCAATGTGTTTGTTTATGTGCACCTGGACTATTGTATTTGGGTAGTCTAGGGAGAGATAATGTCCAGTGTCTCTCTCTCTTACCAAAATCCTTTGAACCAATAAATGGGGGATAAAAATACGAGAGGGTCTATCACAAATACAGTACTCTTGTAAGGGACAGATCAATACAAAAGAAGAAACCATTGTTGGAACAAGAATGGGATAGCACGTTCTGTGCATGGCATAGGAATGGGAGTTGTCTCTAATACAAAGTAGACGGCATCTTGTCTTGTTCAGTCTTGAATCTTATTGCATGTGATATTGGATGACATTTAGAAATGGCAGCTAGTGAAAGATTTTTTCCCTC…	0	NW_022145600.1:11382006-11382547	NW_022145600.1	11382006	11382547	LOC586779	0	AAGTCAACAATAACTGGACTGTCTTGCTCATTTGAATTTAACTGTCAGAGAGCAATGTGTTTGTTTATGTGCACCTGGACTATTGTATTTGGGTAGTCTAGGGAGAGATAATGTCcagtgtctctctctcttaccaaAATCCTTTGAACCAATAAATGGGGGATAAAAATACGAGAGGGTCTATCACAAATACAGTACTCTTGTAAGGGACAGATCAATACAAAAGAAGAAACCATTGTTGGAACAAGAATGGGATAGCACGTTCTGTGCATGGCATAGGAATGGGAGTTGTCTCTAATACAAAGTAGACGGCATCTTGTCTTGTTCAGTCTTGAATCTTATTGCATGTGATATTGGATGACATTTAGAAATGGCAGCTAGTGAAAGattttttccctc…
Scaffold106:675498-675682	Scaffold106	675498	675682	WHL22.27354	SPU_006898	GCTGTTCCATTGAAGTGGGTTATTAGAGTGACCTTCTCTTTTCTCTGCCTGTTGTTCACCCTGATTGGTCCTTACATTTGCCTCAGATAGTCCCCGATGGATCATAACAATGGAAGGGGAACCTTTGGTTAGTTTCTTTGTAAAGAAAATAGAAGATGCTCCCTTCAAAAGAAGATTAATGATT	0	NW_022145600.1:11383496-11383680	NW_022145600.1	11383496	11383680	LOC586779	0	GCTGTTCCATTGAAGTGGGTTATTAGAGTGACCTTCTCTTTTCTCTGCCTGTTGTTCACCCTGATTGGTCCTTACATTTGCCTCAGATAGTCCCCGATGGATCATAACAATGGAAGGGGAACCTTTGGTTAGTTTCtttgtaaagaaaatagaagatgCTCCCTTCAAAAGAAGATTAATGATT
Scaffold106:675917-676531	Scaffold106	675917	676531	WHL22.27354	SPU_006898	TGTCAGCTTTTAGATTATATGTAGCCAAATGCAGGCCTGTATTTTTGTTCAAACTAATTGTCTTTTCAGCTGTGAATGACTACCGGTATAAACTTGATTATCACTGAATACACCTGATATATATTGTCACTGGTCAGTGGACAATAACAACTATGAATGTTATTCTGATCTAGACAAAAGGAAGTAAACAGTCATTTTATCCGAAGTAGATTGGATTAGTTAAATGTAGGTCACAATGATTAGCAGGCCTTGTGTTTGTATTGAGCTTCCTCTACCAGTACTTTTACAAAACAATAGAAAAGTCAATGACTCTAGGTAGATGGGTCAAGTACTTTCCCCATATTGTACAGATAAATGAACAGTACTTATAGATGTGAAGTCCACACTCAGGTAATTTGA…	0	NW_022145600.1:11383915-11384529	NW_022145600.1	11383915	11384529	LOC586779	0	tgtcagCTTTTAGATTATATGTAGCCAAATGCAGGCCTGTATTTTTGTTCAAACTAATTGTCTTTTCAGCTGTGAATGACTACCGGTATAAACTTGATTATCACTGAATACACCTGATATATATTGTCACTGGTCAGTGGACAATAACAACTATGAATGTTATTCTGATCTAGACAAAAGGAAGTAAACAGTCATTTTATCCGAAGTAGATTGGATTAGTTAAATGTAGGTCACAATGATTAGCAGGCCTTGTGTTTGTATTGAGCTTCCTCTACCAGTACTTTTACAAAACAATAGAAAAGTCAATGACTCTAGGTAGATGGGTCAAGTACTTTCCCCATATTGTACAGATAAATGAACAGTACTTATAGATGTGAAGTCCACACTCAGgtaatttga…
Scaffold106:74642-75193	Scaffold106	74642	75193	WHL22.20638	SPU_020749	AGACTTTATAGTGCGTTTTAAAGCCGTTCTTGTAATTTCATTCGACACATCAGCAACAAGTGACACATGTAAACACGATTACGCGCGCGCTTTACATGGGGACAAAAAAAAAAACCTAAATGGACGACAACTTCAGCGCAGCGAGCGCGGGTAATTTGCGTGCATACAGACTAGATCTGTACAGATTATTGTCAGCAAAATTAGTAGACAACTTTTAACGCTGTTTTTAATCCAGACGACCTCTAAACATTTACTAGGTCGAACTCAATCTCTGCGTTAGATATCCAATTTAAACAACGTTAGGCTGGAGCCGGGTGGATTGGAATCAAGAATAAAATCACTGGTATGTTTATTAACGTTTTTTTGTGTGATATCTGTTGGTGATGTTTAGTGTGTGCT…	0	N/A	N/A	N/A	N/A	N/A	N/A	N/A
Scaffold106:796861-797113	Scaffold106	796861	797113	WHL22.21231	SPU_006899	TCCCTAAAATAAATTCAGTCACACTGGAATTAGACAACCAGCCACCCGTGCGTGATATTCGAGAAAATAGTTGTGCAATTATATATAAAAACAAATGTTGGGGGTCGGCGACTGGCATGCACTCAATAGGGGCTCTTCATCCGGGGGATTTCACGCGTGCGATTCCAGTGAATAGACAACATCATAATATGGGTCAACATACGCGATCAAGCGATGCCCACACCGATGATAGGTGTAAAAGGGTGTTGAAAA	0	NW_022145600.1:11504285-11504537	NW_022145600.1	11504285	11504537	LOC577135	31750	TCCCTAAAATAAATTCAGTCACACTGGAATTAGACAACCAGCCACCCGTGCGTGATATTCGAGAAAATAGTTGTGcaattatatataaaaacaaatgttggGGGTCGGCGACTGGCATGCACTCAATAGGGGCTCTTCATCCGGGGGATTTCACGCGTGCGATTCCAGTGAATAGACAACATCATAATATGGGTCAACATACGCGATCAAGCGAAGCCCACACCGATGATAGGTGTAAAAGGGTGTTGAAAA
Scaffold106:810608-811003	Scaffold106	810608	811003	WHL22.21231	SPU_006899	TCCTCATGTCATTTCATTCTCATCAAAAGCACTAACCCTCGGCAAAAAACAAGTGAATTAATACTTAGTGTTTGTCCCGAAGCCTTCCGCGTCACACACACACACACACACACACCCACACACACACACACGCACACGCACACATACACACAAACACTCTCTCTCTCTCTCTCTCTCTCTCTCTCTCGCTGTCTCCTTCTCTCGCTCCCTCCCTCTCCTTATCTATCTCTTTTTCCATTCATACATCCAATATATCTCGAATATTGATTACCTGATTACAGCGTTTCATTTCCCCTTTTATTGTTTTCTTTTCTTTTCATTTCCACCACATTTCTCTTTTCACCCTACTCTGCAACGATCCTTCCAATTCATTCTATCTCTCTCTTTCTCTTTGA	8364	NW_022145600.1:11518125-11518513	NW_022145600.1	11518125	11518513	LOC577135	17774	tcctcatGTCATTTCATTCTTATCAAAAGCACTAACCCTCGGCAAAAAACAAGCGAATTAATACTTAGTGTTTGTCCAGAAGCCTTCCgcgtcacacacacacacacacacacgcacacgcgcacacgcacacatacacacaaacactctctctctctctctctctctctctctctctctcgctgtctccttctctcgctccctcccctctccttaTCTATCTCTTTTTCCATTCATACATCCAATATCTCGAATATTAATTACCTGATTACAGCGCTTCATTTCCccttttattgttttcttttcttttcattttcaccaCATTTCTCTTTTCACCCTACTCTGCAACGATCCTTCCAAttcattctatctctctctttctctttga
Scaffold106:859592-859787	Scaffold106	859592	859787	WHL22.21014	SPU_006216	AGAACATAATGTCATTTACCTTTTTATATGAAAAAGAACAGTGAGGAGAGTTATATTTTTTACTTTGAAAATGATTGTTGTTAAAAGATATTTAGTCCTCCTCATTATGTTTGTTATGGTGTTTTTTTGTTTGTTGTTGTTGTTTTTGTTTCTTTTCTGGTTAACATTAAGTCATTATTTTTTTTTCTTTCAACA	0	NW_022145600.1:11563234-11563429	NW_022145600.1	11563234	11563429	LOC100892098	0	AGAACATAATGTCATTTACCTTTTTATATGAAAAAGAACAGTGAGGAGAgttatattttttactttgaaaatgatTGTTGTTAAAAGATATTTAGTCCTCCTCATTATGTTTGTTatggtgtttttttgtttgttgttgttgtttttgtttcttttctggtTAACATTaagtcattatttttttttctttcaaca
Scaffold1060:293801-294170	Scaffold1060	293801	294170	WHL22.21228	SPU_012330	CGCAAAAATAGCCGACACCCATAGACAACACACGTAAATGGAGTAACCGCACCACAAATTCAATGCTGCGAATTACCCTGCGCGTAAAGAAATATAAGCAACAATTAAATGACGTATATTTCGGTATGATTCTGATTTATTTCGAATGTGTTTATAAATTATATTTATTTAATATAGTTTCTAATGAAAAATGAACGAAGTCAACAAAATACAAAGAGTTTTGAAGCTCAAATAATATCCATCCGCTTGCAGGTATTTGTGTGATACGGTTTCGTTGCTTGGTGACTTCTGAGAAAAGGTCGAAGAGGGTCAACTGGCGGAGCAAAATCTCGCAAATTCTCGCCTCGAAAAGCGAGATTATCAGCTGTT	0	NW_022145605.1:18795514-18795882	NW_022145605.1	18795514	18795882	LOC579683	0	CGCAAAAATAGACGACACCCATAGACAACACACGTAAATGGAGTAACCGCACCACAAATTCAATGCTGCGAATCACCCTGCGCGTAAAGAAATATAAGCAACAATAAAATAGCGTATATTTCGGTATGATTCTGATTTATTTCGAATGtgtttataaattatatttatttaatacagTTCCTAATGAAAAATGAACAAAGTCAACAAATATAAAGAGTTTTGAAGCTCAAATAATATCCATCCGCTTGCAGGTATTTGTGTGATACGGTTTCGTTGCTTGGTGACTTCTGAGAAAAGGTCGAAGAGGGTCAACTGGCGGAGCAAAATCTCGCAAATTCTCGCCTCGAAAAGCGAGATTATCAGCTGTT
Scaffold1060:318216-318607	Scaffold1060	318216	318607	WHL22.21293	SPU_012327	TGTGCTACCTGTACTGGATGAAATGAGGGAGGACATGGGCGGGGCTTGCACTTCGGTAGGACTAACACAACCAGTGTGTGTGTGGAGTGACACTGTCTGTCCTGCAGGTGCTCAAGGAAGTACCACTCCCTTAGGGACAAAAACTCTGACTCACATTCTTTCATTTGTCAAAGGGATTATGAGTCATTTTATAGCCCATTCAGACTATAAGAAACTCGTATACAGAAACGTCCTCCAAAGAAAAAATCAGTGAACAGCGATTGAATGGGGACGTACAACCTAGACAACAAAATTGTATAAAGAAGACTAGTTTTGAACAGAACAATTGACTAGCCAATGCACTCACAATAAGCCTGCCCAGTTGTATGATATTCGTACAATTTGACATTCA	0	NW_022145605.1:18816811-18817202	NW_022145605.1	18816811	18817202	TPC1	0	TGTGCTACCTGTACTGGATGAAATGAGGGAGGACATGGGCGGGGCTTGCACTTCGGTAGGACTAACACAACCAGTGTGTGTGTGGAGTGACACTGTCTGTCCTGCAGGTGCTCAAGGAAGTACCACTCCCTTAGGGACAAAAACTCTGACTCACATTCTTTCATTTGTCAAAGGGATTATGAGTCATTTTATAGCCCATTCAGACTATAAGAAACTCGTATACAGAAACGTCCTCCAAAGAAAAAATCAGTGAACAGCGATTGAATGGGGACGTACAACCTAGACAACAAAATTGTATAAAGAAGACTAGTTTTGAACAGAACAATTGACTAGCCAATGCACTCACAATAAGCCTGCCCAGTTGTATGATATTCGTACAATTTGACATTCA
Scaffold1060:354473-354742	Scaffold1060	354473	354742	WHL22.21293	SPU_012327	GTGTATGAATACATCCTCCTTCGCTTAACCAAGCAAAATGTGACTTCTTGTATTAAAAGGGCTTTTCAAAGCAAAGAAAAGACAGGAAGTGTGTAAATACAATAGAACAGCAAGACAAGGAGATTCAGTGGTAAAATCTAAGAGAGCTTTTGTAAGGAAGTTGGTTATTTGATCAAGGGATTAATGGCAAGAAGTTCATTGTGATCATCACACAATAGCATGTGTGATTACCACGTTATCTTATGTACAAGAACTTATTTTGTTAGTGG	0	NW_022145605.1:18841950-18842219	NW_022145605.1	18841950	18842219	TPC1	0	GTGTATGAATACATCCTCCTTCGCTTAACCAAGCAAAATGTGACTTCTTGTATTAAAAGGGCTTTTCAAAGCAAAGAAAAGACAGGAAGTGTGTAAATACAATAGAACAGCAAGACAAGGAGATTCAGTGGTAAAATCTAAGAGAGCTTTTGTAAGGAAGTTGGTTATTTGATCAAGGGATTAATGGCAAGAAGTTCATTGTGATCATCACACAATAGCATGTGTGATTACCACGTTATCTTATGTACAAGAACTTATTTTGTTAGTGG
Scaffold1060:41749-42207	Scaffold1060	41749	42207	WHL22.21036	SPU_013178	AGAGGAAAACTTAAATGGTTTAAATCGTCTCATTGATCATTGATCTCCGTGTTGGGTGTAGCCCAGGGTTAGTCATAACCGTAATAATAGGAACCGTCCACATGTTGGTACTGCGTGTACGCTTGAGTAAATCCCGAGAGCGTCTAACTGCTTTAATGCCAACCCGTACCGCCATGAATACATGCGGATGTTTTATGGTCAAGTTTGGTAGCAGAGGGGAAGGACTGGTAGAAGAGTACGGTACTACTTATTAATTTGATTGCATTAATGGTGTCTCGAGAACAAAAATAGTCCCAACAGAAACAAATAGCGTTTTGAAAAAGCTACTGCTAGATATAGCGAGACGTGATACAAGCCCTTTTCATAAAATTTTACGGGAAGCGAGCAGAAAACCAGGCC…	2973	NW_022145605.1:18565296-18565754	NW_022145605.1	18565296	18565754	LOC592902	0	AGAGGAAAACTTAAATGGTTCAAATCGTCTCATTGATCATTGATCTCCGTGTTGGGTGTAGCCCAGGGTTAGTCATAACCGTAATAATAAGAACCGTCCACATGTTGGTACTGCGTGTACGCTTGAGTAAATCCCGAGAGCGTCTAACTGCTTTAATGCCAACCCGTACCGCCATGAATAGATGCGGATGTTTTATGGTCAAGTTTGGTAGCAGAGGGGAAGGACTGGTAGAAGAGTACGGTACTACTTATTAATTTGATTGCATTAATGGTGTCTCGAGAACAAAAATAGTCCCAACAGAAACAAATAGCGTTTTGAAAAAGCTACTGCTAGATACAGCGAGACGTGATACAAGCCCTTTTCAGAAGATTTTACGGGAAGCGAGCAGAAAACCAGGCC…
Scaffold1060:43231-43441	Scaffold1060	43231	43441	WHL22.21036	SPU_013178	GCCATGGTCAAATGTTGTGATGATTTATGAAGACATTCGTCAGCCCATAATTATTGTTTCGATCTAAAAAACTTCGAGTGCCACTGCGCGGTCTGTGCACACAAACTACACATAATATGGAGAAGTGCGCCTCGTTGGATATAACGTGACAAGATTTCAACCACGTTACACCTCATGCTACCTGCGCGGCGCCATTTCATGACCAATAAC	4455	NW_022145605.1:18566757-18566966	NW_022145605.1	18566757	18566966	LOC592902	0	GCCATGGTCAAATGTTGTGATGATTTATGAAGACATTCGTCAGCCCATAATTATTGTTTCGATCTAAAAACTTCGAGTGCCACTGCGCGGTCTGTGCACACAAACTACACATAATATGGAGAAGTGCGCCTCGTTGGATATAACGTGACAAGAGTTCAACCACGTTACACCTCATGCTACCTGCGCGGCGCCATTTCATGACCAATAAC
Scaffold1060:43765-44126	Scaffold1060	43765	44126	WHL22.21036	SPU_013178	AAAATCAACTTTGCTGAACGTGTTCACATCAACATATCCTGTAGACTATTCTGTCATGGCAAGTTATAAACTTAACTCTCGAAACATATAGGCATGCCTCTTTAAAACAAGATATTTTGTTGGTATTTCTACTGGACAATACGCCATCCATGCATGGGTACCAGTCACTAAACATCCACTCGTTATGTAATAAAAATGATGTGTGTACGAAGGCTCGGCCTCCAACGTCTTTACTCACAAAACAACCCTGGTTCGTCAATTTAAATACATACCAGTAAAATCATGATGTTAGAAAAAAAAGGATATAATAGGAAACCAAAAAAATACTGGACACACGATAGTAACGATGTCAAAACAAATC	4989	NW_022145605.1:18567287-18567648	NW_022145605.1	18567287	18567648	LOC592902	0	AAAATCAACTTTGCTGAACGTGTTCACATCAACATATCCTGTAGACTATTCTGTCATGACAAATTATAAACTTAACTCTCGAACCATATAGGCATGCCTCTTTAAAACAAGATATTTTGTTGGTATTTCTACTGGACAATACGCCATCCATGCATGGGTACCAGTCACTAAACATCCACTCGTTATGTAATAAAAATGATGTGTGTACGAAGGCTCGGCCTCCAACGTCTTTACTCACAAAACAACCCTGGTTCGTCAATTTAAATACATACCAGTAAAATCATGAtgttagaaaaaaaaggatataatAGGAAACCAAAAAAATACTGGACACACGATAGTAACGAtgtcaaaacaaatc
Scaffold1060:455640-456041	Scaffold1060	455640	456041	WHL22.21242	SPU_028042	ATGCAGTACTTACGTGGTACGTATACGCAACGTATACAATCTTCAGTGACAGTACGTTGCACTTTGTAACGAACTATCTTTCATCACGTGATTTACTTTTGACCAATCGTAGCGCAAGATTCTTAGTATGTGGAATATGATTACTGCTATCTATTGAGGGGGAACGAAACATAAGCAGGATAATAAATTGAACACAATAAGCCTTGACCTTTTGGCTTTTTTTTTCAAATTGCATTTTTAACAGTGATATTGAACCCTCAAAACATCGCTAATCGGTTCAGTATGAACGGAAGTACTGTTCAAACATAATGTCAATGTTAGTACATTGCACTTAAATATCATCTGGAAAAGAAACACGATAAAACACTGTTTATATAACTTACTCACACAGTGGCATAT…	219	NW_022145605.1:18933602-18934002	NW_022145605.1	18933602	18934002	LOC576134	142	ATGCAGTACTTACGTGGTACGTATACGCAACGTATACAATCTTCAGTGACAGTACGTTGCACTTTGTaacgaactatctttcatcacgtgatttacttttgaccaatcgtagcgcaagattcttagtatgtggaatatgaTTACTGCTATCTATTGAGGGGGAACGAAACATAAGCAGGATAATAAATTGAACACAATAAGCCTTGACCTTTTggcttttttttcaaattgcatTTTTAACAGTGATATTGAACCCTCAAAACATCGCTAATCGGTTCAGTATGAACGGAAGTACTGTTCAAACATAATGTCAATGTTAGTACATTGCACTTAAATATCATCTGGAAAAGAAACACGATAAAACACTGTTTATATAACTTACTCACACAGTGGCATATCC
Scaffold1060:53352-53417	Scaffold1060	53352	53417	WHL22.21036	SPU_013178	AGCAGGGTAAGATAAAACAAAGACGAACCTTATACATCTTGCTAAGGTATCCGAGTTCTTTTGGC	14576	NW_022145605.1:18576826-18576891	NW_022145605.1	18576826	18576891	LOC592902	0	AGCAGGGTAAGATAAAACAAAGACGAACCTTATACATCTTGCTAAGGTATCCGAGTTCTTTTGGC
Scaffold1060:95891-96101	Scaffold1060	95891	96101	WHL22.21056	SPU_024117	GACATATTTTGAGGGGGGTGGAGTCTTCCTGTTCTTGTTTTTTTCTTCTCGTATGATCTACGACGGAAGTGGAATTATTTAGAGATACCAAGACAATCCATGAGTAGGGAAGCTTCATCAGATATTCAACTCCCTGTTCCCGGGATGTGGCTAGATCTTACGAAACCTCCAACAATCCCAGATTACCAACAATACAATCTGTCTCTGGGG	10776	NW_022145605.1:18621625-18621835	NW_022145605.1	18621625	18621835	LOC100891447	12268	GACATATTTTGAGGGGGGTGGAGTCTTcctgttcttgtttttttcttctcgtatgATCTACGACGGAAGTGGAATTATTTAGAGATACCAAGACAATCCATGAGTAGGGAAGCTTCATCAGATATTCAACTCCCTGTTCCCGGGATGTGGCTAGATCTTACGAAACCTCCAACAATCCCAGATTACCAACAATACAATCTGTCTCTGGGG
Scaffold1061:16713-17067	Scaffold1061	16713	17067	WHL22.21770	SPU_004711	CTATTCATGTAGGTCTATTCCAATCCTGCCTATGCAGTGCAGTGCTACTGGTCAATACGCAATAGCATTGACTCATCTTGACTTTTAATAGAAGTCTAGATCAAATCGTATTTGGAATTCAATCTAAAAACGTTATTACTAATAATCCCAGTCCCATTTGATGCCTGAACACATGAGGAAACTGAAATTCAACAGAAAATGAAATAGTTTCGGTCTTTGAGCCAACAATTGCACTGAAGACTCCATGAAAATCTATATGTGGGACAACACTATACAATCGGTATGCACTACGCCCATTCGCGCGTTTTACTATTTTTAGACCATTTCGCGCCAGTTCACCCAACTTCGAGTACG	1475	NW_022145613.1:24015121-24015475	NW_022145613.1	24015121	24015475	LOC115920015	1361	CGTACTCGAAGTTGGGTGAACTGGCGCGAAATGGTCTAAAAATAGTAAAACGCGCGAATGGGCGTAGTGCATACCGATCGTATAGTGTTGTCCCACATATAGATTTTCATGGAGTCTTCAGTGCAATTGTTGGCTGAAAGACCGAaactatttcattttctgttgaATTTCAGTTTCCTCATGTGTTCAGGCATCAAATGGGACTGGGATTCTAAGTAATAACGTTTTTAGATTGAATTCCAAATAGGATTTGATCTAGACTTCTATTAAAAGTCAAGATGAGTCAATGCTATTGCGTATTGACCAGTAGCACTGCACTGCATAGGTAGGATTGGAATAGATCTACATGAAAAG
Scaffold1061:241073-241341	Scaffold1061	241073	241341	WHL22.21483	SPU_016087	CTCTAAAATTACACCGATAGAGTTGTGACGTACCAGAATTTGCTGGAAGTATTTTCCACAGCCATCAGTATGCAAATTATCAACAATATGCATTATGTCTGAATTATATTAGAAGTAGATCTCTAAATATATTGAAATTCAGTACAAATATAGATTGTGACATTTTACTTCTATTGCTGCCTTAATATCCATAGAAATGCGTTGAATTTTACCTAAAATGAGACATTTCATTACAGTTTTTGTCCTCGGGACTAGCGGTCAAAGAGCG	477	NW_022145614.1:7136728-7136996	NW_022145614.1	7136728	7136996	LOC373354	520	CGCTAAAATTACACCGATAGAGTTGTGACGTACCAGAATTTGCTGGAAGTATTTTCCACAACCATCAGTATGCAAATTATCAACAATATGCATTATGTCTGAATTATATTAGAAGTAGATCtctaaatatattgaaattcaGTACAAATATAGATTGTGACATATTACTTCTATTGATGCCTTAATATCCATAGAAATGCGTTGAATTTTACCTAAAATGAGACATTTCATTACAGTTTTTGTCCTCGGGACTAGCGGTCAAAGAGCG
Scaffold1061:53812-54033	Scaffold1061	53812	54033	WHL22.21782	N/A	TGAAAAGGGGATTCATGAAAAAAATATTAAATACCGGCTCCATGCAATTTTTAAACCGTTTGTAATGATGTAATGGATATTTCAGGTGATTTGGTTTTCCTTTCTTCCTGGTATGTGGTTGACAGTGACACCTCAAAAGTGATGTGTACACACACACACACACCATATACCACTGTAGTATGCCAGCAGGTATTATCACATGTACCAGTGACTCAGTGGGT	3802	NW_022145614.1:6976341-6976574	NW_022145614.1	6976341	6976574	LOC100892015	0	TGAAAAGGggattcatgaaaaaaatattaaatgccGGCTCCATGCAATTTTTAAACCGTTTGTAATGATGTAATGGATATTTCAGGTGATTTGGTTTTCCTTTCTTCCTGGTATGTGGTTGACAGTGACACCTCAAAAGTGatgtgtacacacacacacacacacacacacacaccatatACCACTGTAGTATGCCAGCAGGTATTATCACATGTACCAGTGACTCAGTGGGT
Scaffold1061:95269-95840	Scaffold1061	95269	95840	WHL22.21318	SPU_015724	AATAACATTTCCTAGTCATTCTACTTTTCAAATGCATCAGCATCAGACAAGACAATTAAGAGCTAAACCTCTAGAGCCTGGTCCAGTGATTACTGATTGGAGAAGAAGAAAAATCCTCTAGATCTACAGAGAGTTCAGTTTATAGGACCGTGTAGGACAGGGGAAATTTTGTTTTGCAAATGTGTCTGTAAGCCATGTATTTAACATTGTCATTTTGACTTAGAACAGTCACCATGAACACACTCAGTACTCACTAACTCAAGACAAGTCAAGACGTGTCAAGAGTCAAACTAAAAACTCATTCAGACATTTGATTCTGTCGTTGTCTCTAATTAGTAAACGGTCGATTTATGTATCTGGAATCATGATTAGCATAGTGCAAGATCGGGTATACAATCA…	0	N/A	N/A	N/A	N/A	N/A	N/A	N/A
Scaffold1062:224462-224827	Scaffold1062	224462	224827	WHL22.21598	SPU_018698	CAATTAGAGGCCGATAATTTGGGAGGAATTCTTCCCAAGATTGCATACGCTCTGTTACCAAGAGGTCAGCTTTGCATCAACGAGTTCAGTCATTGGTTCAATCTCCAATGATGACCTTGGTCTTCATACCAGAATCCAACCAGTCGCGTTAATGCTTTCCGAATCGGAGCTCACTGCGCATGTGATCCGCGCATCGTCTGCACGCCGCGGCCACAAAACTTTTTGCTCGATGTCGCCTGCCTTCTCTCCCGCTCTCATCCCCAGCGCTCAATCACTTGATTGACAAGCCCTTCCGACTAGCTCGCACTTTCCACGCGTGCTCGTCTCAGCAGTAGCACGTATCGGTTACATGTCTACGACAGAGA	0	NW_022145610.1:26328317-26328685	NW_022145610.1	26328317	26328685	LOC577372	10720	TCTCTGTCGTAGACATGTAACCGATACGTGCTACTGCTGAGACGAGCACGCGTAGAAAGTGCGAGCTAGTCGGAAGAGCTTGTCAATCAAGTGATTGAGCGCTGAGGATGAGAGCGGGAGAGAAGGCAAGCGACATCAGATCGAGCAAAAAGTTTTGTGGCCGCGGTGTGCAGACGATGCGCGGATCACATGCGCAGTGAGCTCCGATTCGGAAAGCATTAACGCGACTGGTTGGATTCTGGTAGGACCAAGGTCATCATTGGAGATTGAACCAATGACTGAACTTGATGAGGGCAAGGCTGACCTCTTGGTAACAGAGCGTATGCAATCTTGGGAAGAATTCCTCCCAAATTATCGGCCTCTAATTG
Scaffold1062:229397-229798	Scaffold1062	229397	229798	WHL22.21598	SPU_018698	GGTGAGCAACGTACAGCAGCGTCATAGCAATGCAATACAAACCCCATGAAAAAATAATTACCGCCCTGCGGAGCACACATGAGTGCCTTTATATCTCGGAGAAAAAATAGAAACCCCGTTGTGCTCTGCGTTTCAGTCGTCTGCGTGCACGGACACCCATATTTTGAACAATATGCCCCACTTTGTAAACGTGATCAATTAAATGGTAATAGAGAGGCAGAAACTGCGTTTTTTTTTTTTTGCTACTGCGAGAGAGAAAGTGAGATTTGAGAGAAGGCAATGTACGCTTTTGCAAAGGGTCGCGATTGGAGAGATCGGCGCAGACGACAACGTCTGTGTGTACACATACTTTAGAGATTAGTTTACTCTTTGGCGGGAATCGGTGAAAGCATTCGAAGG…	0	NW_022145610.1:26240032-26240433	NW_022145610.1	26240032	26240433	LOC100892744	0	CTCCTTCGAATGCTTTCACCGATTCCCGCCAAAGAGTAAACTAATCTCTAAAGTATGTGTACACACAGACGTTGTCGTCTGCGCCGATCTCTCCAATCGCGACCCTTTGCAAAAGCGTACATTGCCTTCTCTCaaatctcactttctctctcgcagtagcaaaaaaaaaaaaacgcagtTTCTGCCTCTCTATTACCATTTAATTGATCACGTTTACAAAGTGGGGCATATTGTTCAAAATATGGGTGTCCGTGCACGCAGACGACTGAAACGCAGAGCACAACGGGGTTTCTATTTTTTCTCCGAGATATAAAGGCACTCATGTGTGCTCCGCAGGGCggtaattattttttcatgggGTTTGTATTGCATTGCTATGACGCTGCTGTACGTTGCTCA…
Scaffold1062:291650-291775	Scaffold1062	291650	291775	WHL22.21680	N/A	AACAGGCTTATCTGAGATCAAAACCTTTTCTAAGAACTAGTAAATGGCATTGACCCTATATACGTTGCAAGCAGCGTGCTTCTCTAAACAATTTTGTTTTAAGGAAACAAATCAAGATAATGGTA	7459	NW_022145610.1:26282824-26282940	NW_022145610.1	26282824	26282940	LOC100892744	6743	CTTGATTtgtttccttaaaaaaaaattgtttagagAAGCACGCTGCTTGCAACGTATATAGGGTCAATGCCATTTACTAGTTCTTAGAAAAGGTTTTGATCTCAGATAAGCCTGTT
Scaffold1062:73720-73904	Scaffold1062	73720	73904	WHL22.21534	SPU_005860	AATTCGTAATACCTAAATGTTGTACGCGTCAGATATACGCATACGCACATCTCAGCCGTGCATCATGGGAACTTCTTTGCACGATAGGCGTGGTAGGAAAGTAAATGCGCGGTCACGTGGATGCTGAATTTGTCACTGGTCGGCATTTATTTCTGCAAAAGTGTCTGACTCTGAGCGTCATTTC	0	N/A	N/A	N/A	N/A	N/A	N/A	N/A
Scaffold1063:113530-113908	Scaffold1063	113530	113908	WHL22.22147	SPU_007758	ATACCAAGGACATTTATATTCCCCTATAATAGACGGAGTGAGCATTTGCATCACACTCTGTTTTTTTTTACCTTGAACAAAACCGTTTTATTCAACCTCTCAATAGTTACTGACCGATAAACAAGATAAAGCATCAATCAATAATTTCGCCCCCTCGTTTTGGGCTTCGGTTTGTATGGTGATAGTAACCATTCACCCCCATTCACCCCCATTCACACTGCAAATTCATTGTGTAACGACTTTAAAACAATAGTTGAGGGGTTCACTCCTTACACAGGGGTTGTGTTAAGTTGTGTAAAAAAAAGCCCTTTGTGTAATTTTTTGTACACAACTTAAAACAACCCTTGTGTAACCACTCAACTGTTGTGTAAAGTCGTT	808	NW_022145612.1:58683994-58684370	NW_022145612.1	58683994	58684370	LOC593553	925	ATATCAAGGACATTTATATTCCCCTGACCCCTGTAATAGACGGAGTGAGCATTTGCATCacactctgttttttttttaccttgaaCAAAACCGTTTTATTCAACCTCTCAATAGTTACTGACCGATAAACAAGATAAAGCATCAATCAATAATTTCGCCCCCTCGTTTTGGGCTTCGGTTTGTATGGTGATAGTAACCATTCACCCCCATTCACACTGCAAATTCATTGTGTAACGACTTTAAAACAATAGTTGAGGGGTTCACTCCTTACACAGGGGTTGTGttaagttgtgtaaaaaaaagcCCTTTGTGTAATTTTTTGTACACAACTTAAAACAACCCTTGTGTAACCACTCAACTGTTGTGTAAAGTCGTT
Scaffold1063:193782-193839	Scaffold1063	193782	193839	WHL22.21920	SPU_027346	GAGTCACGTCTTTCGGATGGTGACGTTTAAAGGTCGGTCCCCAGACGTAAATAATCA	0	N/A	N/A	N/A	N/A	N/A	N/A	N/A
Scaffold1063:198458-198787	Scaffold1063	198458	198787	WHL22.21920	SPU_027346	CAGACCAGCTGTATAGACATGAGAATAACCAGAGCCTGCTTAATTTACTGTTTAATATTGCAGAAGACCAAGCAAAGAAAGGTGAGAGAATGGTATATTTTGTATTTTGTACATATATCTCTACAAATGATCTTTAACAACATTTTTTCCTAACAGATTTGATTGATAATGTATAAATCAGTTTATACAAAGTATATCATAAGTTTCACAGAAGAGCCCTAATGAATGCACAGCCTGCAGGCGTACATTTCTAGAAATATATATGACAGTAATTATATTAAATGTTAATTTTGCCCTTTTATCTTGTTTTTCTTTTCGTTTGAAGAGGG	0	NW_022145612.1:57556254-57556583	NW_022145612.1	57556254	57556583	LOC115919200	0	CCCTcttcaaacaaaaagaaaaacaagataaaagggcaaaattaacatttaatatAATTACTGTCATATATATTTCTAGAAATGTACGCCTGCAGGCTGTGCATTCATTAGGGCTCTTCTGTGAAACTTATGATATACTTTGTATAAACTGATTTATACATTATCAATCAAATCTGTTAggaaaaaatgttgttaaagaTCATTTGTAGAGatatatgtacaaaatacaaaatataccatTCTCTCACCTTTCTTTGCTTGGTCTTCTGCAATATTAAACAGTAAATTAAGCAGGCTCTGGTTATTCTCATGTCTATACAGCTGGTCTG
Scaffold1063:214102-214179	Scaffold1063	214102	214179	WHL22.21920	SPU_027346	CGTCAAGAGAGCTAGAAACAGAAGAAATTATATGTTATTAAATTGTAGAAAATAGTTTTTTTAAAGAGAGGGAGGGG	3564	NW_022145612.1:57539626-57539703	NW_022145612.1	57539626	57539703	LOC115919200	6026	cccctccctctctttaaaaaaactattttctACAATTTAATAACATATAATTTCTTCTGTTTCTAGCTCTCTTGACG
Scaffold1063:27491-27549	Scaffold1063	27491	27549	WHL22.21780	SPU_010119	CCACACAGCGAGGTCACTGACAGGGTGGCCATCTCATTAACTCAGCTCTCAACTAACA	826	NW_022145610.1:33155537-33155594	NW_022145610.1	33155537	33155594	LOC100888627	0	ccacccagccaggtcactgacaggtggttatctcatcaacttagctctcaactaaca
Scaffold1063:316601-317306	Scaffold1063	316601	317306	WHL22.21965	SPU_008866	GTTGCATGTTCTTGAAGACATAGACCAGGCCCTCTTCAATAGGACCAATTCACACCTCTTTGTGATGTCATCTATTGTGTCACAAACCTTTTCTTGAAGAAAATTGACATTACCCAAGCACCCAAACCTCCCTTTTCATTCAAGCATCTTTGGTGTCATCTGTTGCTTCCCTAAGCTCTCTTTGAAGACTTAGCCCATGACCAATTCTCACCAAACCATTAGTTCACACTGACCTCACAAAGACCCCTAAGTCATCTTCTCTGAATGAGTCGATTCTTTAGTAGAAATACACAAAAGATGCTCCCTTCTTTGTTCCTGAATGTTAGCACAAAGTCCCTAGTGCCTTTATGTCATGTTTGCCCTCAGTAATTAGACTGTGTCAGTGGGAGAGTCCTATTA…	0	NW_022145612.1:58427003-58427708	NW_022145612.1	58427003	58427708	LOC575539	0	ttcaaattaatttcctAATCAAGACTTATACATTGTGAGGGTAGGTTGGGGCAGCTTGGATCTATTTGGTGAGTGAAACAGAAAGGGATGTAATTGGATGAAATAGGAATGATCACAGACTGCAGATGGGGGATTATTGAATTGAGATATTAATAACTAACCAATTCCTATTATCAGACAGAAACTAATAGTGCATTGATGTTTGTCATTAATGACAATAAAAGATAGGATTAAGGAGGATTTCAGGGATGGGAAGCAGAATTGGTATAATAGTTTGGGTATCACACTCTTTGTGTCTTGCCATGATAATAGGACTCTCCCACTGACACAGTCTAATTACTGAGGGCAAACATGACATAAAGGCACTAGGGACTTTGTGCTAACATTCAGGAACAAAGA…
Scaffold1063:319372-319874	Scaffold1063	319372	319874	WHL22.21965	SPU_008866	GCTGCTCACTAACATTCTAATCCACTCCCAAATAGGACCTGAGTGAGTGAACATCTGCTTAGCAACCTAGCCCTAGCTATAATGAAATGGAGTGTCTTTTCACCAATCAACCTCTACACATCCCAGTTAGGAGAAGAATAGAAAAGAGAGAAAGAAAGATAGATTTCTCCCCTTCTAAGCTCCCAAACTTCTTTTCATTCCTCAGCACACTGTTTGTTGTCTATTGTATTATGTTGGCTTTGGTAGAGGCGCGTGCCAAGCCCTGGCTGCATCCTGAAGCCCGCCCGCCCACCCACCCCACGCTACCCCTAAACAATAGCTCATGCCAAGCGTCAATTGTTTGGCTTTGGTGACTCCTAAGCTCCGGATGAAAGGATGCAAAAAATCATTAAAAGACTG…	0	NW_022145612.1:57439533-57440030	NW_022145612.1	57439533	57440030	LOC115919162	0	AAGGTAAATTACAGACACTAATAAGGCATGGAAAACCATGCaatcattatatatttgttgtaaATTGTGAGTTGGTCTTGTGGCCAGCATGCGCCTCTAACACCAgtcttttattgattttttgcATCCCTTCATCCGGAGCTTAGGAGTCACCAAAGCCAAACAATTGTCGCTTGGCATGAGCTATTGTTAGGGGTAGCGTGGGGTGGGCGGGCGGGTGTCAGGATGCAGCCAGGGCTTGGCACGCGCCTCTACCAAAGCCAACATAATACAATAGATGACAAACAGTGTGCTGAGGAATGAAAAGAAGTTTGGGAGCTTAGAAGGGGAGaaatctatctttctttctctcttttctattcTTCTCCTAACTGGGATGTGTAGAGGTTGATTGGTGAA…
Scaffold1063:321129-321414	Scaffold1063	321129	321414	WHL22.21965	SPU_008866	TCCCGAAGGCTCAAGCCCCAGGCGATTTATTGGATAATCTACCCTCAAGAAAAACTCCCCTAATTTGAGCAATTGTCCTGCGATATTCTTGTTTTAACAATAACTTCACCATAGGCATCCATCTGCCCAGCTCCAGCTAATGACTCCATGTTTGTGTCAGAGGGATATGTGAAAGACACAGAGGGGAGGGAAACCTTTGTGAGTAAGACCATCAACTGAAACCTAAGCAGTGTTAAGAAGGGGTGAGGTGAAAGGATTTGAGAGACTCTGCAAACATAGTTGGGA	0	NW_022145612.1:58422896-58423181	NW_022145612.1	58422896	58423181	LOC575539	0	TCCCAACTATGTTTGCAGAGTCTCTCAAATCCTTTCACCTCACCCCTTCTTAACACTGCTTAGGTTTCAGTTGATGGTCTTACTCACAAAGGTTTCCCTCCCCTCTGTGTCTTTCACATATCCCTCTGACACAAACATGGAGTCATTAGCTGGAGCTGGGCAGATGGATGCCTATGGTGAAgttattgttaaaacaagaATATCGCAGGACAATTGCTCAAATTAGGGGAGTTTTTCTTGAGGGTAGATTATCCAATAAATCGCCTGGGGCTTGAGCCTTCGGGA
Scaffold1063:347754-347841	Scaffold1063	347754	347841	WHL22.22103	SPU_008865	TTTCTTACGGATTAACCTGGTATGCAATAACATAAACCACATGCAGATTTGAAAGGTGTTATCTTTTACCATCTTGTTTCATTTAAG	0	NW_022145612.1:57412998-57413085	NW_022145612.1	57412998	57413085	LOC753842	0	CTTAAATGAAACAAGATGGTAAAAGATAACACCTTTCAAATCTGCATGTGGTTTATGTTATTGCATACCAGGTTAATCCGTAAGAAA
Scaffold1063:362896-363101	Scaffold1063	362896	363101	WHL22.22103	SPU_008865	GCTCCCTGTGTTAGTTCCCTTGGAAAGAAGGATGTGAGATATATTTACAGCACCAGGTATTGGCCAGCTATAGCAGATAAATCAGTCATGTGACCACATATCACATGACCACCATAAAAGGGATATGCTAATGAGTTGAGTTATGTAATGCCAATCAAGCCTAAGTAGCCAGAAATTATCAAGAAAGGTCTAGACCTTCCTCAGT	0	NW_022145612.1:57398622-57398827	NW_022145612.1	57398622	57398827	LOC753842	0	ACTGAGGAAGGTCTAGACCTTTCTTAATAATTTCTGGCTACTTAGGCTTGATTGGCATTACATAACTCAACTCATTAGCATATCCCTTTTATGGTGGTCATGTGATACGTGGTCACATGACTGATTTATCTGCTATAGCTGGCCAATACCTGGCGCCGTAAATATATCTCACATCCTTATTTCCAAGGGAACTAACACAGGGAGC
Scaffold1063:371390-371777	Scaffold1063	371390	371777	WHL22.22103	SPU_008865	CACTTAGTTTTCTTGTTGGAAAGTACAACAAAATAATGCATGATCACCCCCCTTCCAACCCCATGAACAAAAAAGCAGAGCAGTGTTTCCAAGAACTTTCCCTCCTTGTGCACTGCAGGAATGCCAAACCTATTGTGAATAGATTACTGGTAATAAGTAGAAATTAGATGTAACACTCCCATTGCGTCCCTTAAAGTATGAACTCAGCAACAATTGTATCATCTTTCTTTCTTTTGTCTCTTCATCTCTCTTTAGTTTGTAATTTTTAAGCTGATGGGGCTCAGTACCAATTTGTGGTGGGTTGAATGGATGATAGCAAGGGGTGGTTATGGTCTAGGGCTGGTGTGGGCCTCCTGCCTGTGTTGGTAGCCCCCATACCAATTCATC	0	NW_022145612.1:57389908-57390295	NW_022145612.1	57389908	57390295	LOC753842	0	GATGAATTGGTATGGGGCCTACCAACACAGGCAGGAGGCCCACACCAGCCCTAGACCATAACCACCCCTTGCTATCATCCATTCAACCCACCACAAATTGGTACTGAGCCCCATCAGCTTAAAAATTACAAActaaagagagatgaagagacaaaagaaagaaagatgatacAATTGTTGCTGAGTTCATACTTTAAGGGACGCAATGGGAGTGTTACATCTAATTTCTACTTATTACCAGTAATCTATTCACAATAGGTTTGGCATTCCTGCAGTGCACAAGGAGGGAAAGTTCTTGGAAACACTGCTCTGCTTTTTTGTTCATGGGGTTGGAAGGGGGGTGACCATGCATTATTTTGTCGTACTTTCCAACAAGAAAACTAAGTG
Scaffold1063:396613-397171	Scaffold1063	396613	397171	WHL22.22055	SPU_008864	ATTGATAAGCATTTTCAGAAACACTAACCTTTCTTCCTTTTCCTGTGTTATGGTGTTGATTTATTATGATACTCTACATGCCATCTCCGTGAATGTAATCCCCACGGTAATCCTGATCATCATCATCATCATCATCATCATCATCATCATCATCATCATCATCATCATCATCATCATCATTATCTTTGTCTCCATCATCTCTTATTGTCTGCTGAAAGCAAAAATGGTACTAAGTTTCTACTTAACTATACCTCTATACTTGTCAAAAGAGTTAATTCCTTACCTCAACCACTAATGTAACCATGAATCATCAGTATGTCTCTGTTTTCATATTATATTTTGTATCATCACTATGGTTACTTAAGTTCTCATAATCATCTAGTCATGTTACTAAAACTT…	228	NW_022145612.1:58339930-58339946	NW_022145612.1	58339930	58339946	LOC753828	2175	GAAAATGCTTATCAAT
Scaffold1063:461055-461198	Scaffold1063	461055	461198	WHL22.22250	SPU_008863	CATATTGACATCGCTACCTGAGACAAAATAGATGTCTCTCTGGGGATCACAGAGCTTCTAGGAATATCCGTTCACCCGTGAAGAACAATTTTACAAATTTCCTCCCGAGAATAACTCCTTTCTAATCCAACTGAAACACCACT	11330	NW_022145612.1:58275459-58275602	NW_022145612.1	58275459	58275602	LOC115919521	1351	AGTGGTGTTTCAGTTGGATTAGAAAGGAGTTATTCTCGGGAGgaaatttgtaaaattgttcTTCACGGGTGAACGGATATTCCTAGAAGCTCTGTGATCCCCAGAGAGACATCTATTTTGTCTCAGGTAGCGATGTCAATATG
Scaffold1063:461391-461648	Scaffold1063	461391	461648	WHL22.22250	SPU_008863	AGGGGCAAACTCCACCCACGTGCCACAGGGGTCAATTGCCTTTTCTTTTACCTCTCAGTACCTTTCTGTTGTTTGTTGTTGAGTACCTTTTAGAAGGTTTCTAGGTATTACTCTCTCTCTCTCTGTATGGTCTATTCTTCTCTTTGATGTGGTATGGCTTAGTGGTAAAGCAAGGTGTTGGTGAAGGTTAACATGGGGAAAGAAACCTGAGTACTCAAAGGAATAACTAAAAAGATTTCTTTTATTACAAGATGTAT	10880	NW_022145612.1:58275009-58275266	NW_022145612.1	58275009	58275266	LOC115919521	901	AAACAGCTAGTAATAAAAGAAATCTTGTTAGTTATTCCTTTGAGTACTCAGGTTTCTTTCCCCATGTTAACCTTCACCAACACCTTGCTTTACCACTAAGCCATACCACATCAAAGAGAAGAATAGaccatacagagagagagagagtaatacCTAGAAACCTTCTAAAAGgtactcaacaacaaaaaacagaaaggtACTGAGAGGTAAAAGAAAAGGCAATTGACCCCTGTGGCACGTGGGTGGAGTTTGCTCCT
Scaffold1063:462194-462295	Scaffold1063	462194	462295	WHL22.22250	SPU_008863	CTATAGAAACTCAACTCATCTTCTTTTGATTGAGATCTAGTTTTTCATGGTTGACCTGATTCGCTCACCTAGATAAGTCTCGTTTCATTGAGAACCATCCC	10233	NW_022145612.1:58274361-58274462	NW_022145612.1	58274361	58274462	LOC115919521	253	GGGATGGTTCTCAATGAAACTAGACTTATCTAGGTGAGCGAATCAGGTCAACCATGAAAAACTAGATCTCAATCAAAAGAAGATGAGTTGAGTTTCTATAG
Scaffold1063:463548-463884	Scaffold1063	463548	463884	WHL22.22250	SPU_008863	CAAGGCCCCCCTTAACATTGATGAATTAATTATCTAAAATCATTAGTACTAAGTTGATACATTGATTTATTTCTCTTAAGTCAATTTATTACTGAATAATGAGCCATCAGTGAACAAAGTAAATTTGAAAGTTGGTCTATTCTTTGCGCAAATCATGCATATATGTTTCAATGAAGGGAAAAAAAAGTAATTTTCTCCCTTCGATAACAATCTTGTAATTATATGCAGAAGTATTTGATTGAAACAGACACAGGAATTTCAGTGGTTCTTGATAGAAAAGTACTCCAACATTACCTCCCCAGTGAAAAGCTGTCACCATCTCCTAACCCTTGAATG	8644	NW_022145612.1:58270887-58271223	NW_022145612.1	58270887	58271223	LOC115919521	1109	CATTCAAGGGTTAGGAGATGGTGACAGCTTTTCACTGGGGAGGTAATGTTGGAGTACTTTTCTATCAAGAACCACTGAAATTCCTGTGTCTGTTTCAATCAAATACTTCTGCATATAATTACAAGATTGTTATCGAAGggagaaaattacttttttttcccttcattgaAACATATATGCATGATTTGCGCAAAGAATAGACCAACTTTCAAATTTACTTTGTTCACTGATGGCTCATTATTCAGTAATAAATTGACTTAAgagaaataaatcaatgtatcaaCTTAGTACTAATGATTTTAGATAATTAATTCATCAATGTTAAGGGGGGCCTTG
Scaffold1063:480251-480489	Scaffold1063	480251	480489	WHL22.22250	SPU_008863	TATTAGTTGAAAGAACATATCTTACGATATCAAATTCTTCATACATTGTTCTCTTGTGTGTGTGTGTGTGTGTAATCTCTTAGGATGACTGATTTTCTATCTATCGTCTCATGGTGAGAGTGGGAAGTATTTGATTATGGGAGGACAAACAAAATTGTTCCAAAGTTGGTGTCATCATATCCTTGTTATCTACTTAAAGTGAGTCCTCAAGTGATCTTAACCCCCTTCCTTTGTATAC	0	NW_022145612.1:58251633-58251903	NW_022145612.1	58251633	58251903	LOC115919193	0	GTATACAAAGGAAGGGGGTTATAAGATCACTTGAGGGCTCACTTTAAGTAGATAACAAGGATATGATGACACCAACTTTggaacaattttgtttgttctcCCATAATCAAATACTTCCAACTCTCATCATGAGACAATGATAGATAGAAAATCAGTCATCCTAAGagattacacacacacacacacacacacacacacacacacccacacagagagagaaaacaatgtATGAAGAGTTTGATATTGTAAGATATGTTCTTTCAACTAATA
[truncated: 17,517 more rows]

## Sheet: README
Supplemental Table S4: Genomic coordinates, closest gene, and sequences of all eRNA peaks for S. purpuratus genome version 3.1 and 5.0.
