# Supplementary material for: Global patterns of enhancer activity during sea urchin embryogenesis assessed by eRNA profiling
Source: HighWire-hosted journal article supplement (doi:10.1101/gr.275684.121), 2021-07-30
Supplement: Supplemental_Table_S5.xlsx [file Supplemental_Table_S5.xlsx]

## Sheet: Uni_all_enhancersenhancer.expre
eRNA peak	0 hpf	6 hpf	12 hpf	18 hpf	24 hpf	30 hpf	36 hpf	42 hpf	48 hpf
Scaffold1001:143685-144112	0	0	0.0503642	0.0127819	0.0947846	0.190158	0.199555	0.0518509	0.0765707
Scaffold1001:39076-39463	0	0	0.100728	0	0	0	0	0.0129627	0
Scaffold100:164533-164922	0	0.0303433	0.0503642	0	0.0355442	0.0118849	0	0.0388882	0.127618
Scaffold1001:75821-76048	0	0	0	0.0639096	0.0947846	0.0594243	0.0352156	0.0388882	0.0255236
Scaffold100:188592-188928	0	0	0.117516	0	0	0.0237697	0.0352156	0.14259	0.0127618
Scaffold1002:103802-103949	0	0	0.167881	0.0127819	0.106633	0.106964	0.117385	0.0907391	0.433901
Scaffold1002:19848-20406	0.0302083	0.242747	0.721886	0.140601	0.0236962	0.0237697	0.0234771	0.0907391	0.0255236
Scaffold100:227914-228203	0	0	0	0.0255638	0	0.0237697	0	0	0.0382853
Scaffold1002:295707-295831	0	0.0303433	0	0.0894734	0.0355442	0.130733	0.176078	0.311106	0.14038
Scaffold1002:313900-314292	0	0	0	0	0	0.0118849	0.0234771	0.0129627	0.0510471
Scaffold1002:46471-46654	0	0	0.0335761	0.0127819	0.0355442	0.130733	0.105647	0.0648137	0.0255236
Scaffold1002:62193-62303	0	0	0	0	0	0	0.0234771	0.0648137	0.0893325
Scaffold1002:63885-64104	0	0	0	0	0	0	0	0.0777764	0
Scaffold1002:71464-71863	0	0	0.251821	0	0.0236962	0.0118849	0.0469541	0.0129627	0.0382853
Scaffold1002:79844-80347	0	0	0	0.102255	0.0355442	0.118849	0.187817	0.622211	0.255236
Scaffold1002:81001-81250	0	0	0	0.0255638	0	0.0237697	0	0.0388882	0.0127618
Scaffold1002:98397-98518	0	0.0151717	0.0335761	0.0511277	0.0118481	0.0118849	0.129124	0.0259255	0.191427
Scaffold100:305940-306181	0	0	0.0335761	0.204511	0	0	0.0117385	0.116665	0
Scaffold100:317606-317931	0	0	0	0.0639096	0	0	0.0117385	0.0907391	0
Scaffold1003:23973-24363	0.0453125	0	0.0671522	0.0255638	0.0355442	0.0237697	0.0586927	0.0648137	0.0255236
Scaffold1003:27632-27889	0	0	0.0503642	0.0255638	0.0473923	0.0356546	0	0.0518509	0
Scaffold1003:320528-320643	0	0	0	0.0127819	0	0	0	0.0259255	0.280759
Scaffold1003:35062-35376	0	0	0.0671522	0.0255638	0.0118481	0.106964	0.0939083	0.0648137	0.204189
Scaffold1003:72583-72840	0.0453125	0	0.0167881	0	0	0.0713092	0.0117385	0.0388882	0
Scaffold1004:125210-125694	0.196354	0.136545	0.386125	0.60075	0.213265	0.511049	0.751266	0.907391	3.94339
Scaffold1004:185324-185618	0	0	0	0.0127819	0.0118481	0	0	0.194441	0.0127618
Scaffold1004:212896-213230	0	0	0	0.0127819	0.0118481	0.0475395	0	0	0.0382853
Scaffold1004:227783-228100	0	0	0.0167881	0.0383458	0.0118481	0.0356546	0	0.0907391	0.0382853
Scaffold1004:29522-29915	0	0	0.0167881	0.0255638	0.0473923	0.0475395	0.0586927	0.0259255	0.0510471
Scaffold100:436403-436775	0	0.0606867	0.402913	0.0894734	0.142177	0.0237697	0.0117385	0.0388882	0.0510471
Scaffold100:452390-452757	0	0.0151717	0.151093	0.166165	0.0710885	0.0475395	0.117385	0.0777764	0.0893325
Scaffold1005:181407-181704	0	0	0	0	0	0.0356546	0.0234771	0	0.0255236
Scaffold1005:31775-31899	0	0	0.134304	0.0894734	0	0	0.0352156	0.0259255	0
Scaffold100:561347-561454	0	0	0.134304	0.0255638	0.0118481	0.0356546	0	0	0.0382853
Scaffold100:563771-564255	0	0.045515	0.721886	0.370676	0.319898	0.261467	0.281725	0.337031	0.280759
Scaffold100:567409-568205	0	0	0.0167881	0.140601	0.0947846	0.0237697	0.0586927	0.181478	0.102094
Scaffold100:569629-570160	0	0	0.0335761	0.0127819	0.118481	0.178273	0.0586927	0.0518509	0.0255236
Scaffold100:598906-599238	0	0	0.134304	0	0	0.0118849	0	0.0129627	0
Scaffold100:623426-623620	0.0151042	0.09103	1.00728	0.115037	0.0592404	0	0.0234771	0.116665	0.0893325
Scaffold1006:44997-45149	0	0	0.201457	0.0255638	0.0118481	0	0	0	0
Scaffold100:663933-664083	0	0	0	0.0127819	0	0	0.0117385	0.272217	0.0127618
Scaffold1006:73953-74071	0.0453125	0.09103	0.0503642	0.0127819	0	0	0.0234771	0	0.0382853
Scaffold100:674088-674355	0	0	0	0	0	0	0.0117385	0.0388882	0.102094
Scaffold100:684996-685402	0.0302083	0.0303433	0.0335761	0.0127819	0.0236962	0.0118849	0.0117385	0.0129627	0
Scaffold100:688233-688613	0.226562	0.0758583	0.117516	0.0255638	0.0118481	0.0118849	0.0234771	0.0388882	0
Scaffold100:688934-689097	0.392708	0.257918	0.302185	0.0255638	0.0592404	0.0713092	0.0352156	0.0648137	0.0638089
Scaffold1006:93664-94621	0.0151042	0.27309	1.5445	0.281202	0.0473923	0.0475395	0.0469541	1.04998	0.153141
Scaffold1007:130308-130463	0.105729	0.36412	0.402913	0.0511277	0	0.0118849	0.0352156	0.0259255	0.0765707
Scaffold1007:76452-76855	0.0151042	0.0758583	0.0503642	0.0383458	0.0473923	0.0713092	0.0469541	0.0907391	0.0510471
Scaffold1007:76864-77336	0.0151042	0.0303433	0.0503642	0.0766915	0.0473923	0.0237697	0.0234771	0.0648137	0.0510471
Scaffold1007:78641-78982	0.0604166	0.09103	0.100728	0.0255638	0.0592404	0.0950789	0.0704312	0.0388882	0.102094
Scaffold1007:86055-86517	0	0.0151717	0.0503642	0.0127819	0.0473923	0	0.0234771	0.0518509	0.0127618
Scaffold1007:88536-88922	0.80052	0.9103	0.0671522	0.421803	0.0592404	0.083194	0.140862	0.337031	0.0255236
Scaffold1008:110582-110783	0	0	0.0335761	0.0639096	0.0710885	0.083194	0.0117385	0.0907391	0.0382853
Scaffold1008:142840-143102	0	0	0.167881	0	0.0236962	0.0594243	0.0352156	0.0129627	0.0255236
Scaffold1008:17005-17131	0.0604166	0.09103	0.453278	0.0639096	0	0.0118849	0.0352156	0	0
Scaffold1008:194379-194664	0	0	0	0.0127819	0.213265	0.0237697	0.0234771	0.0518509	0.0127618
Scaffold1008:77195-77905	0	0	0.218245	0.0127819	0.0236962	0.0356546	0	0.0129627	0
Scaffold1008:84091-84252	0	0	0.0167881	0.0127819	0	0.130733	0.0352156	0.0259255	0.0382853
Scaffold1008:87452-88171	0	0.0151717	0.0839403	0	0.0236962	0.0237697	0.152601	0.0777764	0.280759
Scaffold100:891381-891621	0	0.0151717	0.251821	0.0383458	0.142177	0.0118849	0.0469541	0	0.0382853
Scaffold1008:95259-95654	0	0	0	0	0	0.0356546	0.0469541	0.0777764	0.0765707
Scaffold1008:95847-96075	0	0.0303433	0.0167881	0.0639096	0.0710885	0.249582	0.0939083	0.0777764	0.0510471
Scaffold1008:97226-97481	0	0.0151717	0.151093	0	0.0236962	0.0237697	0.0352156	0.0129627	0.0127618
Scaffold1008:97632-98222	0	0	0.0167881	0	0	0.118849	0.211294	0.0648137	0.153141
Scaffold1009:103836-104287	165.602	131.114	34.2308	73.0998	70.733	79.6048	82.9327	73.6672	84.0491
Scaffold1009:36018-36407	0.0151042	0.0606867	0	0	0.0236962	0.0356546	0	0.0518509	0.0255236
Scaffold100:970693-970852	0	0	0	0.0255638	0	0	0.0469541	0.0518509	0
Scaffold1010:138785-139243	0	0	0.0167881	0	0.0118481	0.0118849	0.0352156	0.103702	0.0127618
Scaffold1010:139652-140025	0	0.0606867	0.100728	0.115037	0.0236962	0	0	0.0648137	0.0127618
Scaffold1010:147075-147349	0	0.0151717	0	0	0.0473923	0.154503	0.0704312	0.103702	0.102094
Scaffold1010:187446-187757	0	0	0	0	0	0	0.0821697	0.0129627	0.0127618
Scaffold1010:262398-262767	0.0151042	0	0.0503642	0.0255638	0	0.0356546	0	0.0518509	0.0127618
Scaffold1010:263086-263416	0.0151042	0.0303433	0.0671522	0.0127819	0.0118481	0.0475395	0.0234771	0.0129627	0.0382853
Scaffold1011:106848-107257	0.0302083	0.0758583	0.100728	0.0894734	0.0236962	0	0.0234771	0	0
Scaffold101:115695-116058	0	0	0.0167881	0.0255638	0.0473923	0.0118849	0.0586927	0	0.0382853
Scaffold10:1120530-1120774	0.18125	0.0758583	0.201457	0.0383458	0.0710885	0.0356546	0.0352156	0.0518509	0.0893325
Scaffold1011:20582-20972	0.0151042	0.0151717	0.0167881	0.0383458	0.0118481	0.0118849	0.0469541	0	0
Scaffold1011:25853-25903	0	0	0	0.0127819	0.0118481	0.0118849	0.0821697	0.0648137	0.0255236
Scaffold101:14187-14585	0	0	0	0	0.0592404	0.0237697	0.0704312	0.0259255	0.0765707
Scaffold10:1141956-1142165	0	0	0.167881	0.0127819	0.0592404	0.0118849	0.0704312	0.0129627	0.0510471
Scaffold1011:42748-43050	0	0	0.0503642	0.0383458	0.0118481	0	0	0.0259255	0
Scaffold101:157671-157756	0	0	0.0167881	0	0	0.0713092	0	0	0.0255236
Scaffold10:1188241-1188329	0	0.045515	0.386125	0	0	0	0	0.0129627	0
Scaffold1011:91629-91940	0.196354	0.121373	0.117516	0.0127819	0.0118481	0.0475395	0.0469541	0.0259255	0.0765707
Scaffold1012:106617-106820	0	0	0.0335761	0.0383458	0.0118481	0	0	0.0129627	0.102094
Scaffold10:1212472-1212715	0	0.0606867	0	0	0.0118481	0.0475395	0.0117385	0.0129627	0.0510471
Scaffold1012:143713-143749	0	0	0.0503642	0	0	0.0356546	0.0234771	0.0259255	0.0127618
Scaffold1012:157953-158361	0	0	0.0335761	0.0255638	0.0355442	0.0118849	0.0469541	0.116665	0.0255236
Scaffold1012:1777-2405	0	0	0.268609	0.191729	0.106633	0.0475395	0.164339	0.116665	0.0893325
Scaffold1012:20321-20552	0	0.0303433	0.0335761	0	0.0473923	0.0237697	0.0469541	0.116665	0.114856
Scaffold1012:229642-229864	0	0.0303433	0.0167881	0.0639096	0.0829366	0.0594243	0.105647	0.0259255	0.114856
Scaffold101:233043-233239	0	0	0.0335761	0	0	0.0475395	0	0.0259255	0
Scaffold101:239996-240391	0	0	0.0167881	0	0	0.0237697	0	0.0388882	0
Scaffold1012:4115-4532	0	0	0.0335761	0.115037	0.24881	0.166388	0.140862	0.272217	0.306283
Scaffold101:242116-242358	0	0	0.134304	0	0.0355442	0.0118849	0.0234771	0.0129627	0.0255236
Scaffold10:1246915-1247254	0	0	0.369337	0.0127819	0.0947846	0.0237697	0.0117385	0.0259255	0.0382853
Scaffold1012:58224-58466	0.0151042	0	0.100728	0.0255638	0.0236962	0	0.0117385	0	0
Scaffold101:265231-265590	0	0	0.151093	0.0127819	0	0.0118849	0.0352156	0.0129627	0
Scaffold10:1270917-1271254	0	0	0.0671522	0	0.0829366	0.0118849	0.0352156	0.0259255	0.0255236
Scaffold10:1278095-1278195	0	0	0.134304	0	0.0473923	0	0.0117385	0.0259255	0
Scaffold10:1300863-1300879	0	0	0.0503642	0	0	0	0	0	0.0255236
Scaffold1013:117384-117728	0	0.0303433	0.0167881	0.140601	0.0592404	0.0356546	0.0469541	0.0777764	0.0382853
Scaffold1013:118080-118346	0	0	0.117516	0.0383458	0.0236962	0.0237697	0.0234771	0	0.0255236
Scaffold1013:134060-134536	0.0151042	0.0758583	0.318973	0.409021	0.770125	0.582358	0.657358	1.20553	0.421139
Scaffold1013:173926-173934	0	0	0.0503642	0	0.0592404	0.0475395	0	0	0
Scaffold1013:199050-199270	0	0.0151717	0.0167881	0	0.0118481	0.0475395	0	0.0129627	0.0382853
Scaffold10:1328884-1329217	0	0	0.201457	0	0.0236962	0.0118849	0	0	0
Scaffold101:343915-344292	0.0604166	0.0303433	0.0671522	0.0127819	0	0.0118849	0	0	0
Scaffold101:377053-377078	0	0	0	0.0127819	0	0.0118849	0	0.0388882	0.102094
Scaffold101:378771-379413	0.0302083	0.0606867	0.285397	0.345112	0.30805	0.083194	0.140862	1.24442	1.04647
Scaffold10:1386322-1386671	0	0	0.0671522	0.115037	0.0829366	0.166388	0.0469541	0.233329	0.0127618
Scaffold1014:128086-128402	0	0	0	0.0639096	0	0.0118849	0.0117385	0.116665	0.0127618
Scaffold10:1420538-1420834	0	0	0	0.0127819	0.0710885	0.0118849	0.0352156	0.0259255	0.127618
Scaffold10:1432675-1432771	0.0453125	0.121373	0	0	0.0118481	0	0	0	0.0382853
Scaffold10:1451007-1451288	0	0	0.0335761	0.0255638	0.0355442	0	0	0	0.0127618
Scaffold10:1509086-1509342	0.0151042	0.0151717	0.0167881	0.0766915	0.0355442	0	0.0469541	0.0648137	0.0510471
Scaffold10:1522907-1523084	0	0	0	0	0	0.0237697	0.0352156	0.207404	0.0638089
Scaffold10:1525569-1526092	0	0.0151717	0	0.153383	0.36729	0.534819	0.96256	0.80369	0.969895
Scaffold101:526885-527603	0.0302083	0.0758583	0.184669	0.0639096	0.0473923	0.0118849	0.0352156	0.168516	0.0510471
Scaffold1015:335573-336271	0	0.0151717	0.0671522	0	0	0	0.0234771	0.505547	0.0638089
Scaffold1015:350984-351293	0	0	0.0167881	0.0127819	0.0118481	0.0118849	0.0117385	0.0648137	0
Scaffold1015:369288-369663	0	0.0303433	0.117516	0.153383	0.0118481	0	0.0234771	0.194441	0.0255236
Scaffold1015:382373-382747	0.0151042	0.0303433	0.0503642	0.0127819	0	0.0118849	0.0469541	0.0388882	0
Scaffold1015:389127-389473	0	0.136545	0.100728	0.0766915	0.0355442	0.0594243	0.152601	0.518509	0.0382853
Scaffold1015:390081-390104	0	0	0	0.0127819	0	0	0	0.0777764	0.0127618
Scaffold1015:391021-391172	0	0.0151717	0.0503642	0.0127819	0.0118481	0.0118849	0.0234771	0.155553	0.0127618
Scaffold1015:392022-392281	0	0	0	0.0127819	0	0	0	0.181478	0.0255236
Scaffold1015:392627-392855	0	0	0.0335761	0.0894734	0.0118481	0.0237697	0	0.246292	0
Scaffold1015:399951-400121	0	0.0151717	0.0671522	0.102255	0.0118481	0.0356546	0.117385	0.103702	0.0765707
Scaffold1015:55517-55818	0	0	0.0839403	0	0.0118481	0	0	0.0259255	0
Scaffold101:557008-557158	0	0	0.0839403	0	0.0118481	0	0	0.0129627	0.0255236
Scaffold1015:81440-81824	0.0151042	0	0.0503642	0	0.118481	0.0118849	0	0	0
Scaffold101:584713-584943	0	0	0.0839403	0	0	0.0356546	0	0.0129627	0
Scaffold1016:106598-106658	0	0	0	0	0.0118481	0	0	0.103702	0
Scaffold10:1613098-1613286	15.9047	13.518	5.10357	4.93382	9.81021	20.7391	27.3625	14.3238	25.6895
Scaffold10:1646027-1646541	88.9937	73.4916	19.6084	29.7435	36.5987	35.4882	33.1966	32.6791	27.6293
Scaffold101:677961-678163	0	0	0.0671522	0.0255638	0.0473923	0	0.0234771	0.0518509	0.0765707
Scaffold10:1686550-1686662	0	0.045515	0.0671522	0	0.0118481	0	0	0.0388882	0.0127618
Scaffold101:687048-687432	0	0	0.0167881	0.0383458	0.0355442	0.0118849	0.0469541	0.0648137	0.0127618
Scaffold1016:89117-89480	0	0	0.0167881	0.0127819	0.0355442	0.0118849	0.0469541	0.492584	0.0638089
Scaffold101:690302-690653	0	0.0151717	0.0167881	0.0255638	0.0236962	0.0356546	0	0	0.0255236
Scaffold10:1699330-1699707	0	0.303433	0.721886	0.715787	0.189569	0.213928	0.269986	0.518509	0.408377
Scaffold101:705062-705415	0	0	0.167881	0.0127819	0.0236962	0.0118849	0.0117385	0.0388882	0
Scaffold10:1705274-1705295	0	0.0151717	0.0503642	0.127819	0.0355442	0.0356546	0.0117385	0.0518509	0
Scaffold10:1727874-1728171	0.0302083	0.0303433	0.0167881	0.0255638	0	0.0118849	0.0117385	0.0518509	0.0382853
Scaffold10:1732694-1733136	0	0.045515	0.218245	0.0894734	0.0355442	0.0713092	0.0352156	0.0259255	0.0255236
Scaffold10:1739781-1740078	0	0	0	0.0127819	0.0118481	0.0118849	0.0352156	0.0129627	0.0638089
Scaffold101:748278-748389	0	0	0.151093	0	0	0	0	0	0
Scaffold10:1767047-1767432	0.0151042	0.227575	2.70288	9.15185	7.42875	5.36007	3.85024	4.70547	2.57788
Scaffold10:1782760-1783397	0.332292	0.36412	0.0839403	0.0127819	0	0	0	0	0.0127618
Scaffold101:785930-786029	0	0	0	0.0511277	0.0118481	0	0	0.0907391	0
Scaffold10:1874045-1874204	0	0	0	0	0.0355442	0.0713092	0.0469541	0.0259255	0.0127618
Scaffold10:1889437-1889774	0	0	0	0.0511277	0.0118481	0.0475395	0.0117385	0.0777764	0.0255236
Scaffold1019:173730-174118	0	0	0	0	0	0	0	0.14259	0
Scaffold1019:28116-28197	0	0	0.0335761	0.0127819	0	0.0118849	0	0.0907391	0.0255236
Scaffold101:9536-9806	0	0	0.117516	0	0.0118481	0.0356546	0.0117385	0.0259255	0.0127618
Scaffold10:1959526-1959676	0.0604166	0	0.0503642	0.0127819	0	0	0.0234771	0	0
Scaffold1019:65802-65909	0	0	0.0167881	0	0.0355442	0.0237697	0	0.0388882	0
Scaffold10:1973164-1973462	1.40469	0.697897	0.0671522	0.127819	0.130329	0.166388	0.246509	0.194441	0.293521
Scaffold1019:90692-90798	0	0	0	0	0	0	0.0234771	0.0648137	0.0127618
Scaffold10:2004813-2005188	0	0	0.151093	0	0.0236962	0.0118849	0	0	0
Scaffold1020:155077-155193	0	0	0.0839403	0	0.0473923	0.0118849	0.0117385	0.0129627	0
Scaffold10:2034960-2035229	0	0	0	0	0	0	0	0.155553	0.0382853
Scaffold10:2052750-2052935	0.090625	0.0606867	0	0.0255638	0.0355442	0.083194	0.105647	0.0777764	0.102094
Scaffold10:2103431-2103607	0	0	0.0335761	0	0.0236962	0.0713092	0.0352156	0.103702	0
Scaffold102:144717-145075	0	0.0303433	0.167881	0.0255638	0.0118481	0	0	0.0388882	0
Scaffold102:146650-147028	0	0.045515	0.0503642	0.0127819	0	0	0	0	0
Scaffold102:148269-148693	0	0.0606867	0.167881	0	0.0118481	0	0	0.0648137	0
Scaffold102:160247-160576	0	0.257918	0.251821	0.0383458	0	0.0118849	0	0.0129627	0.0255236
Scaffold102:171287-171661	0	0.591695	0.117516	0.0894734	0	0.0118849	0.0586927	0.0648137	0.0127618
Scaffold102:172328-172428	0	0.0606867	0.0503642	0.0383458	0.0118481	0	0	0	0
Scaffold102:185363-185565	0	0	0.0671522	0	0	0.0118849	0	0	0
Scaffold1022:164876-164957	0	0	0.151093	0	0.0710885	0	0.0234771	0	0.0255236
Scaffold1022:2042-2162	0.0604166	0.045515	0.268609	0.102255	0.0236962	0.0356546	0	0.0518509	0.0382853
Scaffold1022:43847-43907	0	0.0151717	0.0671522	0	0.165873	0.0356546	0.0586927	0.0777764	0.0255236
Scaffold102:268752-268879	0	0.151717	0.218245	0.0127819	0	0	0	0.0129627	0
Scaffold102:273877-274214	0	0.106202	0.218245	0.0127819	0	0	0	0.0388882	0.0127618
Scaffold1023:22914-23407	0	0.0758583	0.570794	0.0127819	0.0829366	0.0475395	0.117385	0.103702	0.0255236
Scaffold1023:25250-25610	0	0.0151717	0.184669	0.0255638	0.0829366	0.106964	0.0352156	0.103702	0
Scaffold1023:26283-27364	0	0.242747	0.52043	0.153383	0.142177	0.118849	0.199555	0.129627	0.127618
Scaffold1023:30373-30797	0	0.0303433	0.184669	0.0127819	0.0355442	0.0118849	0.0234771	0.0518509	0.0127618
Scaffold102:351149-351453	0	0	0.0503642	0	0	0	0	0.0259255	0.0127618
Scaffold1023:7487-7907	0	0.106202	0.503642	0.153383	0.0236962	0	0	0.0259255	0.0127618
Scaffold1024:150887-151193	0	0	0.0839403	0.0639096	0.0355442	0.0118849	0.0352156	0.194441	0.0510471
Scaffold1025:5278-5617	0	0	0.0671522	0.0255638	0	0.0118849	0.0821697	0.0518509	0.0255236
Scaffold1025:66280-66661	0	0	0.0167881	0.0255638	0	0.0118849	0.0352156	0.14259	0
Scaffold1026:10280-10513	0.0755208	0.045515	0.100728	0.0383458	0.0355442	0.0356546	0.0117385	0.116665	0.0510471
Scaffold1026:25403-25707	0.0151042	0	0.184669	0	0.0355442	0	0.0469541	0	0
Scaffold1026:41731-41737	0	0	0.0335761	0	0	0	0	0	0.0382853
Scaffold1026:46925-47282	0	0	0	0.115037	0.0473923	0.0118849	0.0117385	0.0259255	0.0127618
Scaffold1026:61771-62132	0	0	0.0335761	0.127819	0.0118481	0	0	0.0388882	0
Scaffold1027:144192-144581	0	0	0.0503642	0.0127819	0	0.0237697	0	0	0.0255236
Scaffold1027:146002-146332	0	0	0.201457	0.0383458	0.0355442	0.0475395	0.0469541	0.103702	0.0638089
Scaffold1027:150289-150684	0	0.0151717	0.0335761	0	0	0	0	0.0518509	0
Scaffold1027:18919-19071	0	0.0151717	0.0503642	0.0127819	0	0.0356546	0.0586927	0.0648137	0.0255236
Scaffold1027:209142-209430	0	0	0.151093	0	0	0	0.0117385	0	0.0127618
Scaffold1027:240510-240847	0	0	0.0167881	0.0127819	0.0236962	0.0356546	0.0469541	0.0259255	0.0255236
Scaffold1028:199690-200011	0	0	0.285397	0	0	0	0.0117385	0.0129627	0.0127618
Scaffold102:85691-85978	0	0	0	0	0.0118481	0.0237697	0.0352156	0	0
Scaffold1028:65619-66018	0	0	0	0	0	0	0.0117385	0.0129627	0.114856
Scaffold1029:142080-142219	0	0	0	0	0	0	0.0234771	0.0388882	0.0255236
Scaffold1029:143185-143671	0	0	0	0.0894734	0	0.0237697	0.0234771	0.699988	0.0893325
Scaffold1029:143901-144156	0	0	0	0.0127819	0	0	0.0117385	0.103702	0.0382853
Scaffold1029:154150-154453	0	0	0	0	0	0.0118849	0.0117385	0.453696	0
Scaffold1029:254429-254802	0	0.0303433	0	0.0255638	0.0118481	0	0	0.0388882	0
Scaffold1029:358303-358635	0	0	0.0671522	0	0	0.0475395	0	0	0.0127618
Scaffold1029:369815-369944	0	0.0303433	0.151093	0.0127819	0	0.0237697	0.0939083	0.0777764	0.0382853
Scaffold1029:373944-374297	0	0	0	0	0	0.0118849	0.0117385	0.0518509	0.0382853
Scaffold1029:382584-382974	0	0	0	0	0.0236962	0.0118849	0.0117385	0.103702	0.0255236
Scaffold1029:389928-390002	0	0.0303433	0	0	0.0118481	0	0.0234771	0.0259255	0.0127618
Scaffold1029:396080-396288	0	0	0.0167881	0.0511277	0.0236962	0.0475395	0.0117385	0.0907391	0.0510471
Scaffold1029:69672-69998	0	0	0	0.153383	0.0118481	0.0356546	0.0469541	1.12776	0.14038
Scaffold1030:104921-105246	0	0.0758583	0.117516	0	0.0355442	0.130733	0.0939083	0.0777764	0.0127618
Scaffold1030:105461-105602	0	0.0303433	0.134304	0	0	0.083194	0.117385	0.0777764	0.0510471
Scaffold1030:106209-106558	0	0.136545	0.318973	0.0894734	0.0355442	0.0237697	0.0586927	0.129627	0.0638089
Scaffold1030:106951-107278	0.0151042	0.09103	0.251821	0.319548	0.154025	0.43974	0.48128	0.505547	0.446662
Scaffold1030:108254-108629	0	0.136545	0.235033	0.0255638	0.0947846	0.0475395	0.0939083	0.116665	0.0765707
Scaffold1030:112101-112454	0	0.0151717	0.235033	0	0.0710885	0.0118849	0.0234771	0	0.0127618
Scaffold1030:286300-286734	0.0151042	0.0303433	0.251821	0.0127819	0.0710885	0.0356546	0.0704312	0.0129627	0.0638089
Scaffold1030:299399-299610	0	0.0151717	0.134304	0.0639096	0.0118481	0.0237697	0.0117385	0.0518509	0.0382853
Scaffold1030:313893-314522	0	0.151717	0.184669	0.0894734	0.106633	0.237697	0.187817	0.311106	0.0765707
Scaffold1030:316287-316879	0.0453125	0.227575	0.302185	0.293984	0.189569	0.320891	0.211294	0.544435	0.165903
Scaffold1030:317421-317916	0	0.106202	0.218245	0.0766915	0.0236962	0.0356546	0.0117385	0.14259	0.0765707
Scaffold1030:319760-319999	0	0.0303433	0.0671522	0.0127819	0.0473923	0.0713092	0.0234771	0.0518509	0
Scaffold1030:375782-376053	0	0	0	0.0255638	0.0236962	0.0237697	0.0469541	0.129627	0.0510471
Scaffold1030:64337-64669	0	0	0.151093	0	0.0710885	0.0356546	0.0352156	0.116665	0.0255236
Scaffold1030:65110-65744	0	0.0303433	0.0503642	0.0511277	0.0592404	0.190158	0.187817	0.272217	0.242474
Scaffold1030:67052-67317	0	0.0151717	0.218245	0.0639096	0.0473923	0.106964	0.0821697	0.168516	0.102094
Scaffold1030:73323-73461	0	0.106202	0.0839403	0.0511277	0.0710885	0.0237697	0.0469541	0.0518509	0.0255236
Scaffold1030:73735-74114	0	0.0606867	0.117516	0.0255638	0.0473923	0.0475395	0.0469541	0.0259255	0
Scaffold1030:75846-76234	0	0	0.0671522	0	0	0	0	0	0
Scaffold1030:79520-80173	0	0.166888	0.285397	0.0894734	0.177721	0.297122	0.0939083	0.194441	0.0765707
Scaffold1030:94985-95370	0	0	0.0503642	0.0383458	0.0592404	0.0713092	0.0117385	0.0648137	0
Scaffold1030:97271-97833	0.0604166	0.72824	1.71238	0.766915	0.533164	1.0221	0.997775	1.10183	0.612566
Scaffold1030:97933-98282	0	0.0151717	0.0671522	0.0383458	0.0236962	0.083194	0.105647	0.168516	0.0893325
Scaffold1031:101936-102122	282.765	238.802	46.7883	84.2328	94.2989	104.718	109.204	120.54	89.4856
Scaffold1031:123358-123516	0	0	0	0.0127819	0.0118481	0	0	0.0777764	0.0127618
Scaffold1031:17867-18175	0	0	0.0503642	0.140601	0.0710885	0.309006	0.0704312	0.0777764	0.14038
Scaffold1031:349880-350029	0	0	0.201457	0.0255638	0.0118481	0.0237697	0	0.0129627	0.0510471
Scaffold103:182800-183083	0	0	0.0671522	0	0.0118481	0.0118849	0	0.0259255	0
Scaffold103:190166-190629	0.0302083	0.0303433	0.117516	0.0639096	0.0355442	0.0713092	0.0234771	0.116665	0.127618
Scaffold1032:10553-10901	0	0	0.100728	0.0383458	0.0592404	0.142618	0.152601	1.02406	0.331806
Scaffold103:255215-255640	0.0151042	0	0	0	0.177721	0.202043	0.176078	0.168516	0.0893325
Scaffold10:336336-336713	0.0755208	0.045515	0	0.0127819	0.0118481	0.0237697	0.0117385	0.0777764	0.0382853
Scaffold1033:83303-83468	0	0	0.201457	0	0.0118481	0	0	0	0
Scaffold103:402219-402587	0	0.0303433	0.52043	0	0.154025	0.0237697	0.0469541	0	0
Scaffold10:346786-347040	0	0	0	0	0.0592404	0.0237697	0.0352156	0.0259255	0.0765707
Scaffold1034:74831-75181	0	0	0	0.0255638	0	0.0118849	0.0234771	0.116665	0.0127618
Scaffold1034:8552-8767	0	0	0.0167881	0.0766915	0.0118481	0.0237697	0.0352156	0.0388882	0.0893325
Scaffold1035:250359-250432	0	0	0	0.0127819	0.0236962	0.0237697	0.0352156	0.0777764	0.0255236
Scaffold1035:270126-270462	0.0604166	0.045515	0.0335761	0.0127819	0.0355442	0.0237697	0.0352156	0.0388882	0.0510471
Scaffold1036:148574-148600	0	0	0.0335761	0	0	0	0.0352156	0.0388882	0
Scaffold1036:153028-153349	0	0	0	0	0	0.0356546	0.0586927	0.0129627	0.0127618
Scaffold1036:88925-89171	0	0	0	0	0.0236962	0.0356546	0.0704312	0.0388882	0.0510471
Scaffold1036:90740-91095	0	0	0	0	0.0473923	0.0356546	0.0586927	0.0259255	0.0255236
Scaffold1037:107691-108169	0	0	0.503642	0	0.177721	0.0713092	0.0117385	0	0.0382853
Scaffold1037:146148-146265	0	0	0.0167881	0.0255638	0.0355442	0.118849	0.105647	0.0518509	0.0765707
Scaffold1037:30356-30577	0.0151042	0	0	0.0255638	0.0236962	0.0118849	0	0.0518509	0
Scaffold1037:34479-34809	0	0	0.0503642	0.0511277	0.0592404	0.0356546	0.105647	0.0259255	0.165903
Scaffold103:735811-736181	0	0	0	0	0.0118481	0.0356546	0.140862	0.0648137	0.14038
Scaffold1037:42674-43040	0	0.0758583	0.0839403	0.319548	0.55686	0.582358	0.551711	0.337031	0.21695
Scaffold103:769884-770176	0	0	0	0	0.0355442	0.0118849	0.0234771	0.116665	0.0510471
Scaffold103:780267-780657	0.0453125	0.0151717	0.570794	0.0127819	0.0947846	0.0237697	0.0234771	0	0.0382853
Scaffold103:796775-797291	0.090625	0.121373	0.184669	0.0894734	0.0947846	0.0475395	0.0939083	0.0777764	0.0510471
Scaffold10:380057-380236	0	0	0.0335761	0	0.0592404	0.0118849	0	0.0129627	0
Scaffold1038:116922-117265	0	0	0.117516	0	0	0	0	0.0388882	0
Scaffold1038:127552-127974	0	0	0.117516	0	0.0118481	0.0118849	0.0117385	0.0259255	0.0510471
Scaffold1038:15296-15441	0	0	0.0335761	0.0511277	0.0236962	0	0.0117385	0	0
Scaffold1038:221533-222071	0	0	0.0671522	0.0639096	0.130329	0.0594243	0.0352156	0.0648137	0.0893325
Scaffold1038:271034-271196	0	0	0.0503642	0	0.0236962	0.0118849	0.0234771	0.0129627	0.0510471
Scaffold1038:279633-279665	0	0	0	0	0	0	0	0.0518509	0.0127618
Scaffold103:841691-842067	0	0.0151717	0	0.0127819	0.0592404	0.0118849	0.0234771	0.0388882	0.0638089
Scaffold1038:70043-70349	0	0.151717	0.235033	0.0383458	0.0118481	0	0.0117385	0.0129627	0.0127618
Scaffold1038:75019-75402	0	0.045515	0.285397	0.0383458	0	0	0	0	0
Scaffold1038:77737-78297	0	0.106202	0.369337	0.217293	0.0592404	0.0475395	0	0.0518509	0
Scaffold1038:80140-80519	0	0.0606867	0.167881	0.0639096	0	0.0237697	0.0234771	0	0
Scaffold1038:82743-82874	0	0.0303433	0.0335761	0	0.0118481	0.0118849	0	0.0907391	0
Scaffold103:886697-887104	0	0.0303433	0.0335761	0	0	0.0118849	0	0.0259255	0
Scaffold103:889051-889352	0	0.0151717	0.0335761	0.0255638	0	0.0118849	0.0469541	0.0259255	0
Scaffold1039:146552-146719	0	0.0151717	0.151093	0.0255638	0.0236962	0	0	0.0648137	0.0382853
Scaffold1039:29405-29626	0	0	0	0.0383458	0.0118481	0.0118849	0.0469541	0.0129627	0.102094
Scaffold1039:5519-5864	0.0151042	0.0151717	1.29268	1.08646	1.36253	1.64011	1.59644	1.89256	1.35275
Scaffold1039:8567-8713	0	0	0.0839403	0	0.0118481	0.0356546	0.0586927	0	0.0510471
Scaffold1040:121355-121755	0.090625	0.0303433	0.167881	0.0127819	0.0473923	0.0237697	0.0234771	0.0518509	0.0127618
Scaffold1040:182838-183141	0	0	0	0	0	0.0237697	0	0.0259255	0.0510471
Scaffold1040:37355-37881	48.1521	36.943	21.2033	19.9142	20.0706	23.9005	24.8387	34.6753	27.4123
Scaffold1041:103321-103686	0	0	0	0.0383458	0.0592404	0.0237697	0.0234771	0.0259255	0
Scaffold1041:104590-104674	0	0	0	0.0639096	0	0.0475395	0.0469541	0.0518509	0.102094
Scaffold104:112118-112493	0.120833	0.0606867	0.184669	0	0.130329	0.0594243	0.0117385	0.0259255	0
Scaffold1041:142517-142943	0	0	0	0	0.0118481	0.118849	0.211294	0.103702	0.14038
Scaffold104:147974-148097	0	0	0	0	0.0473923	0.0356546	0.0469541	0.0907391	0.0127618
Scaffold1041:70820-70901	0	0	0.0335761	0	0.0236962	0.0237697	0	0.0518509	0.0255236
Scaffold1041:82482-82770	0	0	0.0503642	0.0127819	0.0829366	0.0713092	0.0469541	0.194441	0
Scaffold1041:84212-84384	0.0151042	0	0.218245	0.0127819	0.106633	0.0475395	0.0586927	1.10183	0.0382853
Scaffold104:209715-210032	0	0	0.167881	0	0.0473923	0.0118849	0.0469541	0	0.0255236
Scaffold1042:44484-45317	0	0	0.100728	0.613532	0.189569	0.285237	0.140862	1.06294	0.165903
Scaffold1042:45541-46172	0	0	0.0167881	0.281202	0.0592404	0.0713092	0.0352156	0.959242	0.114856
Scaffold1042:46335-46602	0	0	0	0.102255	0.0236962	0.0356546	0.0117385	0.453696	0.0127618
Scaffold1042:50887-51264	0	0.0151717	0.0167881	0.102255	0.0236962	0.0356546	0.0352156	0.181478	0.0255236
Scaffold1042:52012-52688	0	0	0.0335761	0.0639096	0.0947846	0.106964	0.0469541	0.518509	0.14038
Scaffold1042:55561-56223	0	0.0303433	0.0671522	0.626314	0.236962	0.202043	0.375633	0.881466	0.255236
Scaffold1042:56466-56920	0	0	0.0167881	0.0383458	0	0.0475395	0.0234771	0.324068	0.14038
Scaffold1042:57974-58662	0	0	0.0503642	0.26842	0.118481	0.178273	0.223032	1.01109	0.114856
Scaffold1042:58840-59205	0	0	0.0839403	0.153383	0.0947846	0.166388	0.0939083	0.388882	0.114856
Scaffold1042:59413-60077	0	0	0.0503642	0.958644	0.0473923	0.142618	0.0469541	1.47775	0.14038
Scaffold1042:62749-63016	0	0	0	0.0639096	0.0236962	0.0237697	0.0234771	0.194441	0
Scaffold1042:66060-66620	0	0	0.0167881	0.0894734	0.0355442	0.0594243	0.0821697	0.207404	0.0382853
Scaffold1042:69231-69560	0	0	0	0	0	0	0	0.103702	0.0127618
Scaffold104:309276-309294	0	0	0.0839403	0	0.0118481	0	0	0	0
Scaffold1043:244239-244530	0	0	0.0167881	0.0255638	0.0592404	0.0356546	0.0117385	0	0
Scaffold1043:245430-245714	0	0	0.0335761	0	0.0473923	0.0237697	0.0234771	0.116665	0.0765707
Scaffold1043:258016-258178	0	0	0	0.0127819	0.0118481	0	0	0.0648137	0.0127618
Scaffold104:341651-341844	9.75729	6.29624	6.49698	23.6082	24.2767	30.5679	33.9948	33.3013	48.2268
Scaffold1043:57230-57657	0	0	0	0.0127819	0.0118481	0	0	0.246292	0.0382853
Scaffold1043:59277-59603	0.0151042	0	0.0335761	0.0255638	0.0592404	0.0594243	0	0	0.0127618
Scaffold104:360389-360465	0.0151042	0	0.100728	0.0511277	0.0473923	0.0356546	0.0234771	0.0518509	0.0255236
Scaffold1044:214497-214873	0.0151042	0.0606867	0.0167881	0.178947	0.225114	0.130733	0.0469541	0.207404	0.0255236
Scaffold104:425083-425282	0	0.0303433	0.0167881	0.0383458	0	0	0	0.0388882	0
Scaffold104:468068-468437	0	0	0.0335761	0.0255638	0.0355442	0.0356546	0.0234771	0.0388882	0.0255236
Scaffold104:469075-469386	0	0.121373	0.721886	0.178947	0.284354	0.368431	0.363895	0.362957	0.0893325
Scaffold1044:99354-99524	0.0453125	0.09103	0.0335761	0	0.0236962	0	0.0117385	0.0388882	0
Scaffold1045:120449-120850	0	0.151717	1.1248	0.306766	0.24881	0.487279	0.516496	0.246292	0.344568
Scaffold1045:65865-66462	0	0.0151717	0.0167881	0.115037	0.0473923	0.166388	0.187817	0.324068	0.114856
Scaffold1045:70470-70831	0	0	0.0839403	0	0.0118481	0	0	0	0
Scaffold1045:74205-74655	0.0453125	0.151717	0.335761	0.102255	0.0592404	0.130733	0.0352156	0.0648137	0.0765707
Scaffold104:588209-588568	0.0151042	0.0303433	0	0.0383458	0.0118481	0.0356546	0.0352156	0.0907391	0.0127618
Scaffold1045:97849-98167	0	0	0	0.140601	0.0829366	0.0118849	0.0352156	0.155553	0.127618
Scaffold1045:98331-98829	0.0453125	0.227575	0.68831	1.25263	0.319898	0.237697	0.293463	0.699988	0.370092
Scaffold1046:171997-172397	0	0	0.0839403	0	0.0710885	0.0237697	0.0117385	0	0.0127618
Scaffold1046:172785-172932	0	0	0.218245	0	0.0236962	0.0237697	0.0234771	0.0518509	0.0510471
Scaffold1046:190254-190397	0	0	0.251821	0	0.0592404	0.0237697	0.0352156	0.0388882	0.0382853
Scaffold1046:190503-191002	0	0.0151717	0.117516	0	0.0710885	0.0594243	0.0234771	0.0129627	0.0510471
Scaffold1046:19637-19909	0.0151042	0	0	0.115037	0.0355442	0	0.164339	1.99626	0.204189
Scaffold1046:282397-282518	0	0	0.268609	0	0.0118481	0	0	0	0.0255236
Scaffold104:641848-642213	0	0	0.235033	0	0	0	0	0	0
Scaffold104:643673-643832	0	0	0	0	0	0	0	0.0777764	0
Scaffold10:466338-466781	0	0	0.0671522	0.0383458	0.0118481	0.0475395	0.0234771	0.0518509	0
Scaffold1047:117859-118053	0	0	0.100728	0.0127819	0.0118481	0.0713092	0.0234771	0.0259255	0.0255236
Scaffold104:712073-712355	0.105729	0.0151717	0.0671522	0	0.0118481	0.0237697	0.0117385	0.0259255	0
Scaffold1047:200803-201058	0.105729	0.09103	0	0.0255638	0	0	0	0	0
Scaffold1047:201147-201639	0.332292	0.242747	0.0671522	0.0511277	0.177721	0.130733	0.164339	0.14259	0.204189
Scaffold1047:246422-246686	0	0	0	0	0.201417	0.190158	0.234771	0.324068	0.0638089
Scaffold1047:262568-262600	0	0	0.134304	0	0.118481	0	0.0117385	0	0.0127618
Scaffold104:726672-726851	0	0.0151717	0.0167881	0.0127819	0.0355442	0.0237697	0	0.0129627	0.0255236
Scaffold1047:315375-315757	0	0.045515	0.0839403	0.102255	0.0236962	0	0	0.0518509	0
Scaffold104:767110-767490	0	0	0	0	0.0355442	0.0118849	0	0.0129627	0.0638089
Scaffold1047:83489-83880	0.120833	0.0758583	0.0167881	0.0383458	0.0236962	0.0594243	0.0586927	0.0518509	0.0510471
Scaffold104:809783-810308	0.0453125	0.0303433	0.0335761	0.178947	0	0	0.821697	0.635174	0.0765707
Scaffold1048:61300-61541	0	0	0.0335761	0.0127819	0.0118481	0	0.0586927	0.0777764	0.0893325
Scaffold104:864876-865235	0.0453125	0.045515	0.369337	0.0127819	0.0355442	0.0237697	0	0.0388882	0.0255236
Scaffold1048:68238-68388	0	0.0758583	0.167881	0.0255638	0	0	0	0	0
Scaffold1048:70522-70974	0	0.242747	1.22553	0.204511	0	0.0118849	0.0117385	0.168516	0
Scaffold1048:75163-75207	0	0.0606867	0.60437	0	0.0592404	0	0	0	0.0127618
Scaffold104:892410-892747	0.0302083	0	0.201457	0	0.0710885	0.0118849	0.0939083	0.0518509	0.0382853
Scaffold1049:142885-143348	0	0.0151717	0.0167881	0	0.0355442	0.0594243	0.105647	0.0518509	0.153141
Scaffold105:10991-11198	0.0302083	0.09103	0.0167881	0.0639096	0.0236962	0.0118849	0	0.0648137	0
Scaffold105:129064-129230	0.0151042	0	0.0503642	0.0127819	0.0473923	0.0475395	0.0117385	0	0.0382853
Scaffold105:15810-15948	0	0	0.0167881	0.0383458	0.0236962	0.0118849	0.0117385	0.0518509	0.0382853
Scaffold105:195350-195536	0	0	0	0	0	0.0118849	0.0117385	0.233329	0
Scaffold1052:153735-154383	0	0.0303433	0.167881	0.0639096	0.0236962	0.0118849	0.0586927	0.0648137	0.0510471
Scaffold1052:154978-155263	0.0755208	0.106202	0.302185	0.33233	0.130329	0.106964	0.0821697	0.259255	0.178665
Scaffold1052:42819-43011	0	0	0.0167881	0.0127819	0	0.0475395	0	0.0388882	0.0510471
Scaffold105:257164-257486	5.49791	5.00665	4.7846	3.65563	9.77467	11.1955	12.3842	9.91649	8.16754
Scaffold105:267527-267704	0	0	0	0	0.0473923	0.0118849	0.105647	0.0388882	0.0255236
Scaffold1053:108182-108563	0.0302083	0	0	0.0255638	0.0236962	0.0237697	0.0352156	0.0259255	0.0510471
Scaffold1053:130133-130416	0	0	0.0503642	0	0	0	0	0.116665	0.0255236
Scaffold1053:172158-172245	0	0.121373	0.0671522	0	0	0	0	0.0777764	0
Scaffold1053:212592-212926	0	0	0.0335761	0.0639096	0.24881	0.178273	0.176078	0.194441	0.165903
Scaffold1053:224797-225864	1.54062	1.09236	1.32626	1.00977	0.390987	0.43974	0.516496	0.414807	1.39103
Scaffold1053:230424-230779	0	0	0.0335761	0	0	0.0118849	0.0117385	0.0129627	0.0893325
Scaffold1053:250338-250630	0	0.0151717	0	0.0255638	0	0	0.0939083	0.0388882	0.0510471
Scaffold1053:285676-285972	0	0	0.251821	0	0.0118481	0	0.0586927	0.0518509	0.0382853
Scaffold1053:304598-304717	0	0.045515	0.167881	0	0	0	0	0	0
Scaffold105:341985-342319	0.0604166	0.136545	0.0839403	0.102255	0.0710885	0.0118849	0.0704312	0.0777764	0.0638089
Scaffold105:356985-357149	0.0755208	0.09103	0.0839403	0.0383458	0.0473923	0.0118849	0.0117385	0	0.0255236
Scaffold105:36697-36811	0	0	0	0.0383458	0	0	0	0.0907391	0
Scaffold1054:126413-126659	0	0.0606867	0.285397	0.127819	0.0118481	0.0475395	0.0117385	0.103702	0.0510471
Scaffold1054:128355-128835	0	0.09103	0.184669	0.0383458	0.0355442	0.0356546	0.0234771	0.0907391	0.0255236
Scaffold1054:169696-169931	0	0	0	0	0.0592404	0.0237697	0.117385	0.0777764	0.0255236
Scaffold1054:171322-171693	0	0	0.0167881	0.0127819	0	0.0118849	0	0.0907391	0.0127618
Scaffold1054:250881-251191	0	0	0.100728	0.26842	0.225114	0.178273	0.199555	0.246292	0.153141
Scaffold1054:251592-251781	0	0	0.0503642	0.0255638	0	0.0118849	0.0469541	0	0
Scaffold1054:252824-253211	0	0	0.0167881	0.0639096	0	0.0237697	0.0586927	0.0648137	0
Scaffold1054:254737-255101	0.0151042	0.0758583	0.218245	0.0383458	0.0473923	0.118849	0.129124	0.0907391	0.0638089
Scaffold1054:265551-266044	0.0453125	0.0303433	0.856191	0.166165	0.165873	0.202043	0.187817	0.103702	0.178665
Scaffold1054:281322-281668	0	0.0606867	0.285397	0.0511277	0.0118481	0.0118849	0	0.0259255	0.0510471
Scaffold1054:288008-288398	0	0.045515	0.302185	0.0383458	0.0118481	0	0.0352156	0	0.0127618
Scaffold1054:288881-289031	0	0	0.0839403	0	0	0	0	0	0
Scaffold105:478043-478374	0	0.0151717	0	0.140601	0.0118481	0.0118849	0	0.129627	0.0382853
Scaffold105:486863-487200	0	0.0151717	0.218245	0.0255638	0.0236962	0.0237697	0.0117385	0.0388882	0.0127618
Scaffold105:487335-487594	0	0.09103	0.0503642	0.0383458	0.0118481	0.0118849	0	0.0777764	0.0127618
Scaffold105:489633-490094	0	0.106202	0.705098	0.255638	0.236962	0.178273	0.199555	0.959242	0.242474
Scaffold105:490307-490889	0.0151042	0.121373	0.621158	0.242856	0.225114	0.261467	0.352156	0.440733	0.14038
Scaffold105:492197-492541	0	0.0151717	0.0839403	0.0639096	0.0236962	0.0713092	0.0821697	0.168516	0.127618
Scaffold105:494829-494962	0	0	0.134304	0	0.0118481	0.0118849	0	0.0388882	0
Scaffold105:500554-500965	0	0.0151717	0.100728	0.0894734	0.0473923	0.0475395	0.0117385	0.181478	0.114856
Scaffold105:501717-501853	0	0	0.0167881	0.0894734	0.0355442	0.0118849	0.0352156	0.259255	0.0255236
Scaffold10:550855-551002	0	0	0.0503642	0.0127819	0.0355442	0	0	0.0259255	0
Scaffold1055:51176-51706	0	0	0.0839403	0	0.0592404	0	0.0234771	0	0.0127618
Scaffold1056:119823-120087	0	0.106202	0.856191	0.792479	0.225114	0.142618	0.0586927	0.103702	0.0255236
Scaffold1056:20326-20389	0	0.0151717	0.151093	0	0.0236962	0.0118849	0	0.0388882	0
Scaffold1056:20725-21093	0	0	0.134304	0.0127819	0	0.0118849	0.0352156	0	0
Scaffold1056:24226-24567	0	0	0.0167881	0.0127819	0.0473923	0.178273	0.281725	0.272217	0.267997
Scaffold1056:28363-28466	0	0	0	0	0.0118481	0.0356546	0.0704312	0.103702	0.114856
Scaffold1056:30313-30690	0	0	0	0.0127819	0	0.142618	0.305202	0.0777764	0.191427
Scaffold1056:42926-43274	0.0453125	0.0303433	0.0167881	0.0383458	0.0473923	0.0713092	0.129124	0.103702	0.0765707
Scaffold10:56721-57039	0	0	0	0.0255638	0.24881	0.154503	0.0821697	0.272217	0.0382853
Scaffold1057:4189-4670	0.0151042	0.106202	0.587582	0.677442	0.770125	0.820056	1.00951	1.16665	0.829516
Scaffold1057:45758-46016	0.0453125	0	0.0167881	0.0255638	0.0947846	0.0356546	0.0117385	0.0907391	0.0382853
Scaffold1057:83124-83294	0.0755208	0.27309	1.4102	0.191729	0.0829366	0.0950789	0.0352156	0.0777764	0.0638089
Scaffold1058:129661-129885	0	0	0.117516	0	0.0118481	0.0118849	0	0.0388882	0
Scaffold1058:159666-159924	0	0	0	0.0255638	0.0710885	0.0118849	0.0586927	0.0388882	0.0510471
Scaffold1058:193206-193567	0	0	0.0335761	0	0	0	0	0.0388882	0.0638089
Scaffold1058:206164-206444	0	0	0.167881	0.0383458	0.0236962	0.0356546	0.0117385	0.0129627	0.0127618
Scaffold1058:209757-210157	0	0.0151717	0.0335761	0.0766915	0.0355442	0.0118849	0.0234771	0.0648137	0.0255236
Scaffold1058:216242-216740	0.0604166	0.0758583	0.0503642	0.217293	0.0947846	0.213928	0.164339	0.0777764	0.114856
Scaffold1058:255873-256072	0	0	0.0335761	0.0383458	0.0473923	0.0475395	0.0117385	0	0
Scaffold1058:260713-261039	0	0.09103	0.0167881	0.115037	0.0710885	0.0356546	0.0821697	0.233329	0.153141
Scaffold1058:267417-267776	0	0	0	0.115037	0.0118481	0.0118849	0.0117385	0.531472	0
Scaffold1058:278731-279171	0	0	0	0	0	0.142618	0.39911	0.194441	0.255236
Scaffold105:830344-830437	0	0	0.0839403	0.0639096	0.0118481	0	0	0.0259255	0.0255236
Scaffold1058:363173-363245	0	0.0151717	0.0839403	0.0383458	0.0118481	0	0	0.0129627	0
Scaffold1058:366190-366539	0	0.0151717	0.0503642	0	0.0355442	0.0237697	0.0234771	0.0129627	0.0127618
Scaffold1058:367868-368416	0.0604166	0.0606867	0.856191	13.7406	1.33883	2.03231	2.64117	11.8479	3.35635
Scaffold1058:370737-371197	0	0	0.0167881	0.166165	0.0118481	0.0950789	0.140862	0.842578	0.178665
Scaffold10:587054-587444	0	0	0	0	0	0	0.0234771	0	0.0382853
Scaffold10:588713-588971	0	0	0.0503642	0.0766915	0.0473923	0.106964	0.0586927	0.116665	0.0765707
Scaffold1060:293801-294170	3.91198	2.98882	8.2933	9.44584	16.4096	19.5268	22.9254	17.7201	20.4827
Scaffold1060:318216-318607	0	0.0151717	0.335761	0.166165	0.0947846	0.106964	0.0586927	0.194441	0.0510471
Scaffold1060:354473-354742	0	0	0.117516	0.0511277	0	0	0	0.0259255	0
Scaffold1060:41749-42207	0	0	0.134304	0.0766915	0.0829366	0.237697	0.176078	0.272217	0.204189
Scaffold1060:43231-43441	0	0	0	0.0127819	0.0118481	0.083194	0.0352156	0.116665	0.0127618
Scaffold1060:43765-44126	0	0	0	0.0383458	0.0355442	0.083194	0.0586927	0.0648137	0.204189
Scaffold1060:455640-456041	0.0151042	0	0	0.0255638	0.0236962	0.0594243	0.117385	0.0777764	0
Scaffold1060:53352-53417	0	0	0	0	0	0	0	0.0777764	0.0127618
Scaffold1060:95891-96101	0	0	0	0.0894734	0	0.0118849	0	0.0907391	0
Scaffold106:100586-100880	0	0	0.0167881	0	0.0118481	0.106964	0.152601	0.168516	0.14038
Scaffold106:102888-103194	0	0	0	0	0.0236962	0.0594243	0.0586927	0.103702	0.0765707
Scaffold1061:16713-17067	0	0.0151717	0.0335761	0.0255638	0.0592404	0.106964	0.152601	0.0129627	0.0127618
Scaffold1061:241073-241341	0	0	0.0671522	0.204511	0.0118481	0.0594243	0.0352156	0.220366	0.0382853
Scaffold1061:53812-54033	0	0	0	0	0.0710885	0.0594243	0.0704312	0.103702	0.127618
Scaffold1061:95269-95840	0	0.0151717	0	0.319548	0.0236962	0	0.0117385	0.298143	0
Scaffold10:620234-620433	0	0.0151717	0	0.0127819	0.165873	0.0356546	0	0	0
Scaffold1062:224462-224827	0	0	0.0167881	0.0127819	0.0355442	0.0356546	0.0117385	0.0518509	0.0127618
Scaffold1062:229397-229798	0.0453125	0.0303433	0.318973	0	0.130329	0.0475395	0.0939083	0.181478	0.0255236
Scaffold1062:291650-291775	0	0	0.0671522	0	0.0118481	0.0118849	0	0.181478	0
Scaffold106:23222-23407	0	0.045515	0.100728	0.0383458	0	0.0118849	0.0352156	0	0.0382853
Scaffold106:233900-234183	0	0	0.0671522	0.140601	0.0118481	0.0713092	0	0.129627	0
Scaffold106:235309-235606	0.0151042	0.0606867	0.0671522	0.102255	0.0118481	0.0356546	0.0117385	0.0388882	0.0127618
Scaffold106:265887-266291	0	0	0.0335761	0.0383458	0.0118481	0.0475395	0.0352156	0.0388882	0.0638089
Scaffold106:270749-271143	0	0	0.0671522	0	0.0236962	0.0118849	0	0.0129627	0
Scaffold1062:73720-73904	0.0302083	0.0151717	0.100728	0.102255	0	0	0	0	0
Scaffold106:290535-290781	0	0.0303433	0.100728	0.0511277	0.0592404	0.0237697	0	0.129627	0
Scaffold106:296977-297313	0	0	0	0	0	0	0	0.0518509	0
Scaffold106:300647-300940	0.0151042	0	0.134304	0.0127819	0.0118481	0.0118849	0.0117385	0.0777764	0
Scaffold106:304223-304563	0	0	0.0671522	0.0127819	0.0118481	0.0237697	0.0117385	0.0259255	0
Scaffold106:307534-307916	0	0	0.0839403	0.0255638	0	0.0356546	0.0469541	0.0777764	0.0255236
Scaffold1063:113530-113908	0	0.045515	0.318973	0.115037	0.201417	0.237697	0.176078	0.337031	0.191427
Scaffold1063:193782-193839	0.392708	0.333777	0.218245	0.293984	0.177721	0.154503	0.246509	0.207404	0.178665
Scaffold1063:198458-198787	0.120833	0.151717	0.0839403	0.127819	0.154025	0.154503	0.105647	0.0907391	0.102094
Scaffold1063:214102-214179	0	0.0151717	0.167881	0.0127819	0.0355442	0.0356546	0.0117385	0	0.0893325
Scaffold1063:27491-27549	0	0.0151717	0.0839403	0.0255638	0.0355442	0	0	0	0.0382853
Scaffold1063:316601-317306	0.0453125	0.0606867	0.134304	0.0894734	0.0710885	0.0594243	0.0234771	0.168516	0.0893325
Scaffold1063:319372-319874	0	0.18206	0.721886	0.230075	0.177721	0.213928	0.199555	0.0777764	0.127618
Scaffold1063:321129-321414	0	0.045515	0.369337	0.153383	0.189569	0.0713092	0.152601	0.181478	0.102094
Scaffold1063:347754-347841	0.0151042	0	0.151093	0	0.0236962	0	0	0	0
Scaffold1063:362896-363101	0	0	0	0.0127819	0.0118481	0.0356546	0.0352156	0.0777764	0.0127618
Scaffold1063:371390-371777	0	0	0	0	0	0	0.0352156	0.233329	0.0382853
Scaffold1063:396613-397171	0	0	0.0839403	0	0.0118481	0	0.0234771	0.0129627	0.0255236
Scaffold1063:461055-461198	0	0	0	0	0.0118481	0.0237697	0.0939083	0.298143	0.165903
Scaffold1063:461391-461648	0	0	0	0.0127819	0.0236962	0.0118849	0.152601	0.596286	0.319045
Scaffold1063:462194-462295	0	0	0.0839403	0	0	0.0237697	0.0117385	0.0518509	0.0510471
Scaffold1063:463548-463884	0	0	0.134304	0	0	0	0	0	0
Scaffold1063:480251-480489	0.0302083	0.0303433	0.0167881	0.0255638	0.0829366	0.0475395	0	0.0648137	0.0510471
Scaffold1063:500649-501035	0	0	0.100728	0	0	0	0.0234771	0	0.0127618
Scaffold1063:502309-502759	0.0755208	0.0151717	0	0	0	0.0237697	0	0.14259	0.0127618
Scaffold1063:533124-533245	0	0.0151717	0.201457	0.102255	0.0236962	0.0356546	0	0.103702	0.0382853
Scaffold1063:534382-534818	0	0	0.0167881	0	0.130329	0.90325	1.44384	1.76293	0.969895
Scaffold1063:535301-535580	0	0	0	0.0127819	0.0118481	0.0475395	0.223032	0.764801	0.127618
Scaffold1063:69027-69143	1.26875	0.561352	0.318973	0.0511277	0.0829366	0.0237697	0.0586927	0.129627	0.127618
Scaffold1063:72321-72459	0	0	0.0167881	0.0511277	0.284354	0.225812	0.0939083	0.194441	0.0510471
Scaffold1063:89594-90537	0	0	0.151093	0.0383458	0.106633	0.178273	0.152601	0.194441	0.21695
Scaffold1063:94914-96602	126.528	105.731	41.6512	30.9706	38.447	36.748	30.8606	44.3066	30.003
Scaffold1064:121565-121792	0	0	0.100728	0	0.0592404	0.0118849	0.0117385	0.0129627	0
Scaffold1064:123441-123679	0	0	0.151093	0.0127819	0	0	0	0	0
Scaffold1064:127890-128274	0	0	0.0335761	0.0255638	0.0118481	0.0356546	0.0234771	0.0777764	0.0127618
Scaffold1064:129269-129629	0	0	0.167881	0.0255638	0	0.0237697	0.0234771	0.0259255	0
Scaffold1064:176582-176976	0	0	0	0.0383458	0	0.0118849	0.0939083	0	0
Scaffold10:64234-64624	0	0	0.117516	0.0127819	0.0947846	0.0237697	0.0586927	0.0129627	0.0255236
Scaffold1064:33993-34415	0.226562	0.121373	0.251821	0.26842	0.130329	0.154503	0.199555	0.181478	0.280759
Scaffold1064:39182-39556	0	0.0151717	0.0839403	0.0511277	0.0118481	0	0	0.0388882	0.0127618
Scaffold106:442693-442718	0	0.0151717	0	0.0383458	0.0592404	0.0594243	0.0586927	0.0129627	0.0893325
Scaffold1065:179996-180012	0	0.0151717	0.167881	0	0.0236962	0	0	0	0
Scaffold1065:22738-22891	0	0	0.0167881	0	0.0592404	0.0118849	0.0117385	0.0518509	0.0127618
Scaffold106:573054-573241	0	0.151717	1.57808	0.204511	0.0355442	0	0	0.0648137	0.0127618
Scaffold106:576832-577016	0.0604166	0.0303433	0.0503642	0	0	0.0118849	0	0	0.0127618
Scaffold106:605058-605124	0	0	0.0839403	0.0766915	0.0236962	0.0118849	0.0234771	0.0259255	0.0255236
Scaffold106:607820-608327	0	0.0303433	0.251821	0.204511	0.189569	0.118849	0.105647	0.388882	0.0893325
Scaffold1066:113934-114270	0.377604	0.333777	0.100728	0.191729	0.438379	0.653667	0.903867	0.687025	1.49313
Scaffold1066:115186-115569	0	0	0.0167881	0	0.0118481	0.0356546	0.0352156	0.0388882	0
Scaffold1066:120161-120516	0	0	0	0	0.0118481	0.320891	0.422587	0.272217	0.689136
Scaffold1066:121397-121622	0	0	0.0167881	0	0.0355442	0	0.0352156	0	0.0255236
Scaffold1066:126382-126452	0	0	0.117516	0.0127819	0.0118481	0.0237697	0.0352156	0.0129627	0
Scaffold1066:153566-153793	0	0	0.134304	0.0127819	0.0473923	0	0	0	0.0255236
Scaffold1066:162925-162971	0	0.0606867	0	0.0127819	0	0	0.0117385	0.0259255	0
Scaffold106:619758-620147	0	0	0.0335761	0	0.0236962	0.0118849	0.0117385	0.0259255	0
Scaffold106:622608-622708	0.0151042	0	0.0671522	0	0.0947846	0	0.0117385	0.0388882	0
Scaffold106:623755-624012	0	0	0	0	0.225114	0.594243	1.02125	1.07591	1.72284
Scaffold106:669282-669775	0.105729	0.045515	0.285397	1.32932	0.130329	0.154503	0.187817	1.69812	0.255236
Scaffold106:671209-671514	0	0	0	0.0383458	0	0	0.0352156	0.0777764	0.0255236
Scaffold106:673280-673749	0	0	0	0.0127819	0	0	0.0352156	0.324068	0.0127618
Scaffold106:674008-674549	0	0.0151717	0.0671522	0.0383458	0	0.0237697	0.0234771	0.14259	0.0510471
Scaffold106:675498-675682	0	0.0151717	0	0.0127819	0.0118481	0.0118849	0.0352156	0.129627	0.0510471
Scaffold106:675917-676531	0	0	0	0.0511277	0.201417	0.487279	0.586927	0.440733	0.93161
Scaffold1066:92841-92883	0.0151042	0.0606867	0.0839403	0.0127819	0.0236962	0.0118849	0.0234771	0	0
Scaffold1067:266075-266407	0	0	0	0.0127819	0	0.0118849	0.0234771	0.0388882	0.0255236
Scaffold1067:29518-29754	0	0	0	0.0127819	0.0355442	0	0.0117385	0.0388882	0.0255236
Scaffold1067:40101-40322	0	0.045515	0.117516	0.0255638	0.0592404	0.0118849	0.0821697	0.0388882	0.0382853
Scaffold1067:41850-42081	0	0.0151717	0.285397	0.0639096	0.0236962	0.0950789	0.152601	0.155553	0.255236
Scaffold106:74642-75193	6.99323	5.71972	4.11307	8.70449	14.2295	16.0208	20.3311	18.5886	18.645
Scaffold1067:66011-66334	0	0.0303433	0.0503642	0.0383458	0.0118481	0.0356546	0.0352156	0.0388882	0.0255236
Scaffold1067:69210-69627	0	0.0758583	0.0335761	0.0255638	0.0236962	0.356546	0.117385	0.0388882	0.0893325
Scaffold1067:70709-71073	0	0	0.100728	0	0.0710885	0.118849	0.129124	0.0907391	0.0638089
Scaffold1067:82443-82739	0.0604166	0.0151717	0.0503642	0.0127819	0	0	0	0	0
Scaffold10:678871-679406	0.0302083	0	0.0335761	0.319548	0.0118481	0.0356546	0.0234771	0.272217	0.0127618
Scaffold1067:93987-94371	0	0.0758583	0	0	0.0118481	0	0	0	0
Scaffold106:796861-797113	0	0	0.302185	0	0.0710885	0	0.0117385	0.0129627	0
Scaffold106:810608-811003	0	0	0.419701	0	0.0473923	0.0118849	0.0117385	0	0
Scaffold1068:127086-127187	0	0	0	0.0383458	0.0118481	0.0356546	0.0234771	0.0648137	0.0382853
Scaffold106:859592-859787	0.0453125	0.0303433	0.0335761	0.0127819	0.0236962	0.0237697	0.0352156	0	0.0127618
Scaffold1069:25611-25980	0	0	0.0167881	0	0.0947846	0.0594243	0	0.0129627	0
Scaffold1070:10060-10362	0.0302083	0	0.0671522	0.0127819	0.0710885	0.0475395	0.0234771	0.0129627	0.0127618
Scaffold1070:91085-91154	0	0	0	0.0383458	0	0	0.0117385	0.0388882	0.0127618
Scaffold1070:93185-93533	0	0	0.0167881	0.166165	0	0	0	0.129627	0.0638089
Scaffold107:181472-181722	0	0	0	0	0.0473923	0.0475395	0.0234771	0.0648137	0
Scaffold1071:94678-94777	0	0	0.0335761	0.0894734	0.0236962	0.0118849	0	0.0259255	0.0127618
Scaffold1072:104820-105204	0	0.0151717	0.0671522	0.0127819	0.0118481	0	0.0234771	0	0.0255236
Scaffold1072:178218-178608	0	0	0	0.0127819	0	0	0.0469541	0.0259255	0.0127618
Scaffold1072:213403-213506	0.0453125	0	0.0503642	0.0383458	0.0473923	0.0356546	0.0117385	0.0388882	0.0382853
Scaffold1072:278162-278419	0	0	0.0167881	0	0	0.0475395	0	0.0777764	0.0127618
Scaffold1072:303920-304015	0	0.0303433	0.0839403	0.0894734	0	0	0.0352156	0.0777764	0.0382853
Scaffold1072:314222-314436	0	0	0	0	0	0.083194	0.0352156	0.0648137	0.127618
Scaffold1072:37531-37578	0	0.045515	0.134304	0.0127819	0.0118481	0.0475395	0.0352156	0.0129627	0.0638089
Scaffold1072:52809-52928	0	0	0.0335761	0	0.0355442	0.0356546	0.0234771	0.116665	0.0382853
Scaffold107:260558-260788	0	0.0151717	0.0167881	0	0	0.0237697	0.0704312	0.116665	0.0127618
Scaffold10:726481-726713	0	0	0	0.0255638	0.0118481	0	0	0.0129627	0.0382853
Scaffold1072:70505-70889	0	0	0.134304	0	0	0	0.0117385	0	0.0127618
Scaffold1072:71516-71864	0	0.0151717	0.268609	0	0.0473923	0.0594243	0.0469541	0.0777764	0.0127618
Scaffold107:281117-281308	0	0	0.0503642	0.0639096	0.0829366	0.0118849	0	0.0129627	0
Scaffold107:281843-281868	0	0	0.235033	0.0127819	0.0592404	0.0237697	0.0117385	0	0
Scaffold1072:8252-8652	0	0.0303433	0.0503642	0.127819	0.0236962	0	0.0234771	0.0388882	0.0382853
Scaffold107:286298-286502	0	0	0	0.0255638	0.0947846	0.0356546	0.0704312	0.0129627	0.0382853
Scaffold1072:86849-87396	0	0	0.100728	0.0127819	0.0473923	0.0118849	0.0352156	0	0.0127618
Scaffold107:30224-30573	0	0	0.0503642	0.0127819	0.0355442	0.0118849	0	0	0.0255236
Scaffold107:303922-304745	0	0	0.134304	0.460149	0.201417	0.0356546	0.0469541	0.116665	0.127618
Scaffold1073:142399-142784	0	0	0.0167881	0.0127819	0.0592404	0.118849	0.0117385	0.155553	0.0127618
Scaffold1073:145528-145820	0	0.0606867	0.0167881	0.0127819	0.165873	0.3922	0.234771	0.0777764	0.0765707
Scaffold1073:155595-156006	0	0	0	0	0	0.0237697	0.117385	0.14259	0.0382853
Scaffold107:342259-342857	0	0.0151717	4.85175	4.26916	1.06633	0.273352	0.0939083	0.414807	0.0255236
Scaffold107:343642-344048	0	0.0151717	0.151093	0.0255638	0	0.0118849	0.0234771	0	0.0255236
Scaffold107:347966-348356	0	0	0.100728	0.0127819	0	0	0	0	0
Scaffold1073:48705-48796	0.0151042	0.0606867	0.151093	0.0383458	0.0592404	0.0475395	0.0939083	0.0518509	0.0382853
Scaffold107:350542-350909	0	0.18206	0.117516	0.0127819	0	0	0	0	0
Scaffold107:351912-352003	0	0.0151717	0.302185	0.0127819	0.0236962	0.0237697	0	0.0388882	0
Scaffold1073:54738-55175	0.0151042	0	0.0503642	0.0511277	0.177721	0.90325	0.927344	0.622211	0.535995
Scaffold1073:55583-56081	0.0604166	0.121373	0.503642	0.434585	0.0710885	0.178273	0.0704312	0.531472	0.0510471
Scaffold1073:56933-57850	0.589062	0.606867	1.15838	0.460149	0.497619	0.713092	0.469541	0.518509	0.331806
Scaffold107:359913-360261	0	0.0151717	0.470066	0	0.0118481	0	0.0117385	0.0777764	0.0127618
Scaffold107:367402-367767	0.0151042	0.045515	0.990495	0.0766915	0.0592404	0.0356546	0.0821697	0.28518	0.0893325
Scaffold10737:1023-1265	0	0	0.0167881	0	0	0	0.0234771	0.0648137	0.0255236
Scaffold1073:90784-90949	0	0.0303433	0.0167881	0	0.0236962	0.0118849	0.0352156	0	0.0127618
Scaffold1074:123497-123860	0	0.0606867	0.318973	0.102255	0	0.0237697	0	0.0129627	0
Scaffold1074:137001-137345	0	0.0151717	0.167881	0	0	0.0118849	0	0	0
Scaffold1074:140281-140781	0	0.0151717	0.839403	0.0127819	0.24881	0.118849	0.129124	0.0129627	0.0382853
Scaffold1074:155155-155499	0	0	0.218245	0.370676	0.0473923	0.0950789	0.0117385	0.259255	0.0893325
Scaffold1074:162266-162784	0	0.136545	0.60437	0.191729	0.118481	0.0594243	0.129124	0.14259	0.191427
Scaffold1074:187167-187260	0.0151042	0	0.251821	0	0.0592404	0	0.0352156	0	0.0127618
Scaffold1074:197247-197571	0	0.0151717	0.302185	0	0.0592404	0.0950789	0.0234771	0.0129627	0.0765707
Scaffold1074:370579-370770	0	0	0.167881	0.0255638	0.0118481	0.0237697	0.0352156	0	0.0255236
Scaffold107:447343-447442	0	0	0.0167881	0	0	0.0237697	0.0586927	0.0777764	0.165903
Scaffold107:464936-465203	0	0	0.167881	0	0.0118481	0	0.0117385	0.0129627	0.0638089
Scaffold1074:95123-95433	0	0.0151717	0.235033	0	0.0473923	0.0237697	0.0234771	0	0
Scaffold1075:122233-122527	0.0453125	0	0.0167881	0	0.0118481	0	0.0234771	0.0129627	0.0510471
Scaffold1075:130826-131178	0	0	0.0503642	0	0.0355442	0	0	0	0.0127618
Scaffold10:751761-752092	0	0	0	0	0.0118481	0	0	0.0777764	0
Scaffold10:752130-752517	0	0	0	0	0.24881	0.178273	0.0469541	0.0388882	0.0765707
Scaffold1075:42512-42651	0	0.0151717	0.201457	0.0511277	0.0592404	0.0237697	0.0352156	0.116665	0.0638089
Scaffold10:754685-755025	0	0	0.0335761	0.0255638	0.0710885	0.0475395	0.0586927	0.0907391	0.0638089
Scaffold1075:58319-58597	0	0	0.134304	0.0639096	0.0473923	0.0356546	0.105647	0.116665	0.0382853
Scaffold107:578296-578650	0	0.0151717	0.0839403	0	0	0.0237697	0.0117385	0	0
Scaffold10:758189-758557	0	0	0.0503642	0.0127819	0.0829366	0.0356546	0.0117385	0.0518509	0.0255236
Scaffold10:762577-762932	0	0.0151717	0.100728	0.0511277	0.0355442	0.0237697	0.0234771	0.0518509	0.0127618
Scaffold10:763365-763625	0	0	0	0.140601	0.177721	0	0.0352156	0.0907391	0.0127618
Scaffold1076:39813-40070	0	0.0151717	0.0503642	0	0.0236962	0.0237697	0.0234771	0	0.0127618
Scaffold1076:54668-55047	0.0755208	0	0	0.0127819	0.0473923	0.0118849	0	0.0777764	0.14038
Scaffold1076:6235-6523	0	0.0151717	0.167881	0.178947	0.130329	0.190158	0.0821697	0.14259	0.0893325
Scaffold1076:62490-62886	0	0	0.0335761	0.0383458	0.0355442	0.0237697	0	0.0259255	0.0127618
Scaffold10768:662-922	0	0	0	0	0	0.0475395	0	0	0.102094
Scaffold107:728488-728830	0	0	0.0167881	0	0.0355442	0.0237697	0.0586927	0.0518509	0.0255236
Scaffold107:7347-7651	0	0	0.117516	0	0	0.237697	0	0.0129627	0.0382853
Scaffold107:749537-749845	0	0	0	0	0.0118481	0.0594243	0.0234771	0.0388882	0.0255236
Scaffold107:750221-750632	0	0	0	0	0.0118481	0.0594243	0.0234771	0.0518509	0.0510471
Scaffold107:757671-758051	0	0	0.0167881	0.0127819	0.0710885	0.178273	0.0586927	0.0777764	0.14038
Scaffold107:759201-759415	0	0.0151717	0	0.0383458	0.106633	0.309006	0.140862	0.181478	0.204189
Scaffold107:799544-799954	0	0	0	0.0255638	0.0355442	0.0475395	0.0586927	0.103702	0.114856
Scaffold1078:109967-110198	0	0	0	0.0127819	0.0118481	0.0594243	0.0821697	0.0907391	0.0127618
Scaffold1078:117348-117752	0	0	0.184669	0.127819	0.30805	0.166388	0.152601	0.0777764	0.114856
Scaffold1078:118345-118843	0	0	0.167881	0	0.0473923	0.0118849	0.0469541	0.0129627	0
Scaffold107:81428-81559	0	0	0	0.0127819	0	0	0.0704312	0.0518509	0.0127618
Scaffold1078:148719-148998	0	0	0	0.0255638	0.0473923	0.0237697	0.0586927	0	0.0382853
Scaffold1078:176907-177350	0	0	0.167881	0.0894734	0.0118481	0.0118849	0	0.0388882	0
Scaffold1078:249886-249897	0	0	0.0167881	0	0.0710885	0.0356546	0.0234771	0.0259255	0
Scaffold107:887755-887986	0	0	0	0.0383458	0.0118481	0	0.0117385	0.0907391	0.408377
Scaffold1079:15598-15925	0	0.0151717	0.0503642	0.0766915	0.0118481	0.0475395	0.0117385	0.0907391	0.0127618
Scaffold1079:16556-16944	0	0.0303433	0.100728	0.0766915	0.0473923	0	0.0234771	0.0259255	0
Scaffold1079:34469-34773	0	0	0.453278	0.0766915	0.0829366	0.083194	0.0704312	0.0648137	0.102094
Scaffold1079:35606-35644	0.0453125	0.0151717	0.554006	0	0	0.178273	0.0939083	0.155553	0.114856
Scaffold1079:35864-36172	0	0	0.0335761	0	0.0355442	0.0237697	0.0234771	0.0648137	0
Scaffold1079:37487-37880	0	0.0303433	0.268609	0.127819	0.0710885	0.0950789	0.0586927	0.492584	0.0255236
Scaffold107:938360-938725	0.0151042	0	0.100728	0.0383458	0.0236962	0	0.0117385	0.0648137	0
Scaffold1080:101722-101929	0	0	0.0503642	0.140601	0.0118481	0	0	0.103702	0.0382853
Scaffold1080:159624-160042	0	0	0	0.0894734	0	0	0.0117385	0.103702	0
Scaffold108:1000524-1000851	0.0453125	0.0151717	0	0.0255638	0.0118481	0	0	0	0.0127618
Scaffold108:1005435-1005518	0.0302083	0	0.100728	0.0766915	0.0710885	0.083194	0.0352156	0.0388882	0.0255236
Scaffold108:1013765-1013970	0	0.045515	0.0335761	0.153383	0.0118481	0.0475395	0.0234771	0.259255	0.0510471
Scaffold1081:102734-103437	0	0.0151717	0.235033	0.0127819	0.0118481	0.0118849	0.0352156	0.155553	0
Scaffold1081:105702-106008	0	0.106202	0.0839403	0	0.0355442	0.0356546	0.0117385	0.0907391	0.0127618
Scaffold1081:146870-146980	0	0.106202	0.0503642	0.0894734	0.0947846	0.0356546	0.0234771	0.0388882	0
Scaffold1081:154195-154333	0	0.09103	0.0503642	0.0383458	0.0236962	0	0	0.0259255	0
Scaffold1081:171687-171908	0.0302083	0	0.100728	0.0127819	0	0	0.0234771	0.0648137	0.0510471
Scaffold1081:199877-200195	0	0	0	0.0127819	0.0355442	0	0.0469541	0.0777764	0.0255236
Scaffold108:128558-128919	0	0	0	0.0255638	0.0236962	0	0.0117385	0.0259255	0
Scaffold108:135368-135755	0	0	0	0.0255638	0	0	0.0234771	0.0777764	0
Scaffold1081:56031-56188	0	0	0.0167881	0	0.0355442	0.106964	0.129124	0.0777764	0.0893325
Scaffold1081:64851-65209	0	0.0151717	0.0839403	0.0639096	0.0592404	0.0594243	0.269986	0.181478	0.267997
Scaffold1081:67769-68229	0	0	0.184669	0.153383	0.0710885	0.309006	0.387372	0.324068	0.510471
Scaffold1082:159531-159769	0	0.09103	0.151093	0.0255638	0.0710885	0.178273	0.152601	0.181478	0.306283
Scaffold1082:164213-164490	0	0	0.0335761	0	0.0829366	0.0475395	0.0469541	0.0388882	0.0510471
Scaffold1082:184476-184811	0	0	0.0839403	0.0383458	0	0	0	0	0
Scaffold1082:189496-189851	0	0.0758583	0.268609	0.0639096	0	0	0.0117385	0.0129627	0.0127618
Scaffold1082:240381-240708	0	0	0.134304	0.0127819	0.0355442	0.0356546	0	0	0
Scaffold1082:281127-281189	0	0	0	0	0.0236962	0.0475395	0.0234771	0.0907391	0
Scaffold1083:103556-103700	0	0	0	0	0.0236962	0.0237697	0.0586927	0.0259255	0.0638089
Scaffold1083:153074-153384	0	0	0	0.0255638	0.0473923	0.0713092	0.0117385	0	0.0255236
Scaffold1083:156410-157083	0	0	0.0335761	0.153383	0.355442	0.213928	0.246509	0.337031	0.165903
Scaffold1083:166830-166977	0	0	0	0.0766915	0	0	0.0117385	0.42777	0
Scaffold1083:168730-169252	0	0	0	0.115037	0.177721	0.130733	0.140862	0.14259	0.165903
Scaffold1083:191843-192200	0.0453125	0.0151717	0.0167881	0.0894734	0	0	0	0.207404	0.0127618
Scaffold1083:280083-280486	0	0	0	0.0255638	0.0236962	0.0118849	0.0117385	0.298143	0.0765707
Scaffold1083:285253-285718	0	0.09103	1.59487	0.575186	0.687189	0.653667	0.657358	0.972205	0.650851
Scaffold1083:287162-287341	0	0.045515	0.0671522	0.0766915	0.0473923	0.083194	0.105647	0.349994	0.165903
Scaffold1083:288038-288221	0	0.0151717	0.0335761	0.0127819	0.0710885	0.130733	0.176078	0.116665	0.0765707
Scaffold1083:295792-296275	0	0	0.235033	0.166165	0.473923	0.320891	0.551711	0.349994	0.267997
Scaffold1083:66703-66888	0	0	0	0.0127819	0.0355442	0.0118849	0	0.103702	0
Scaffold10:839376-840133	36.7937	36.0024	2.35033	5.04886	13.4476	14.5352	18.9343	12.159	11.2304
Scaffold108:418984-419282	0	0	0	0.0639096	0.201417	0.0950789	0.0352156	0.14259	0.0638089
Scaffold108:420042-420112	0	0	0	0.0127819	0.165873	0.0237697	0.0586927	0.0259255	0
Scaffold108:424788-425025	0	0.0151717	0.100728	0	0.0355442	0.0118849	0	0.0259255	0
Scaffold1084:297082-297431	0	0	0	0	0.0118481	0	0.0586927	0	0.0127618
Scaffold1085:125417-125801	0	0.0151717	0.0839403	0.0639096	0.0355442	0.0237697	0.0352156	0.0518509	0
Scaffold1085:130861-131262	0	0	0.0335761	0.0511277	0.0236962	0.0237697	0.0234771	0.0129627	0
Scaffold1085:131827-132034	0	0.0151717	0.0503642	0.0255638	0.0473923	0.0594243	0.0469541	0	0
Scaffold1085:145166-145562	0	0	0	0.0383458	0.0592404	0	0	0.0129627	0
Scaffold1085:145778-146162	0	0	0	0.0127819	0.0355442	0.0237697	0.0234771	0.0129627	0
Scaffold1085:282447-282576	0	0	0	0	0.0592404	0.0118849	0.0352156	0.0129627	0.0127618
Scaffold1085:307246-307863	0.0151042	0.0606867	0.0503642	0.0894734	0.154025	0.225812	0.258248	0.375919	0.331806
Scaffold1085:311137-311511	0	0	0	0	0.0592404	0.0356546	0.0117385	0.0129627	0.0127618
Scaffold1085:314472-314855	0	0.0151717	0	0.0383458	0.0118481	0.083194	0.0586927	0.155553	0.0382853
Scaffold1085:335895-335972	0	0.0151717	0	0.0127819	0.0473923	0.0475395	0.0469541	0.14259	0.0255236
Scaffold1085:345893-346360	0	0	0.0335761	0.0639096	0.118481	0.0950789	0.246509	0.116665	0
Scaffold1085:349315-349657	0	0.0303433	0.0839403	0.0511277	0.0592404	0.0594243	0.0352156	0.0777764	0.0127618
Scaffold1085:38538-38692	0	0	0.0167881	0.0766915	0.0829366	0	0	0.0648137	0.0127618
Scaffold1085:45974-46256	0	0.0303433	0.100728	0.0127819	0	0	0	0	0
Scaffold108:591339-591832	0	0.0303433	0.251821	0.102255	0.0355442	0.0713092	0.0234771	0.0388882	0.0127618
Scaffold1086:130740-131150	0.0604166	0.0303433	0	0.0127819	0.0355442	0.106964	0.246509	0.311106	0.663613
Scaffold1086:154357-154603	0	0	0.0167881	0.33233	0	0.0356546	0	0.57036	0.0127618
Scaffold1086:163777-164087	0.0453125	0.0758583	0.0167881	0.0127819	0.0118481	0.0356546	0.0117385	0.0129627	0.0638089
Scaffold108:644717-645094	0	0	0	0.0511277	0.0236962	0.0118849	0.0704312	0.0907391	0.0382853
Scaffold108:648064-648221	0.0151042	0	0	0.0127819	1.2085	0.962674	0.892129	3.34439	0.229712
Scaffold108:65221-65536	0	0	0	0.0127819	0	0	0.0117385	0.207404	0.0638089
Scaffold1087:136757-137367	0	0.121373	0.570794	0.434585	0.154025	0.0950789	0.0939083	0.233329	0.0382853
Scaffold1087:185169-185556	0.422916	1.25925	0.554006	0.33233	0.0829366	0.653667	0.246509	0.583323	0.599804
Scaffold1087:25093-25482	0	0	0	0	0.0236962	0.0118849	0.0352156	0.0259255	0.127618
Scaffold1087:83520-83725	0	0	0.117516	0.0894734	0.0947846	0.0356546	0.0704312	0.116665	0.0765707
Scaffold1088:14009-14104	0	0	0.117516	0.0127819	0.0710885	0.0237697	0	0.0777764	0.0510471
Scaffold1088:88787-88867	0	0	0.285397	0.0127819	0.177721	0	0	0	0
Scaffold1089:106459-106686	0.0453125	0.0151717	0.251821	0.0127819	0.130329	0.190158	0.199555	0.246292	0
Scaffold1089:115585-115956	0.090625	0	0.151093	0.0766915	0.0355442	0.166388	0.211294	0.129627	0.204189
Scaffold1089:120232-120675	0	0	0	0.0511277	0	0.0475395	0.0586927	0.0518509	0.0893325
Scaffold1089:121745-122189	0	0	0	0.0255638	0.0118481	0.0713092	0.164339	0.155553	0.127618
Scaffold1089:127189-127272	0	0	0.0839403	0	0.0710885	0.0118849	0.0352156	0.0259255	0.0638089
Scaffold10:893828-894194	0.0151042	0.0303433	0	0	0	0.0118849	0.0469541	0.0388882	0
Scaffold1089:51359-51588	0	0	0.0335761	0.178947	0.0355442	0.0118849	0.0821697	0.181478	0
Scaffold1089:51891-52461	0	0	0.0335761	0.984208	0.0236962	0.0237697	0.105647	1.16665	0.0127618
Scaffold1089:52646-53144	0.196354	0.197232	0.0167881	3.16992	0.177721	0.237697	0.363895	3.33142	0.344568
Scaffold108:964300-964663	0.196354	0.0758583	0.0335761	0.0127819	0.0118481	0	0.0117385	0.0259255	0.0382853
Scaffold10:898442-898807	0.0302083	0	0.0503642	0	0	0	0	0	0.0127618
Scaffold1089:89923-89982	0.0302083	0	0	0	0.0118481	0	0	0.0518509	0
Scaffold1091:12604-12927	0.0151042	0.0151717	0.0671522	0	0.0236962	0	0	0	0.0127618
Scaffold1091:35108-35658	0	0.0151717	0.201457	0.383458	0.30805	0.261467	0.340418	0.401845	0.255236
Scaffold1091:58022-58350	0	0.0151717	0.0167881	0.0255638	0.0473923	0.0237697	0	0.0518509	0
Scaffold1091:69796-70409	0.0604166	0.0606867	0.100728	0.0639096	0.106633	0.106964	0.0586927	0.0259255	0.0255236
Scaffold1091:80725-80846	0	0	0	0	0	0.0118849	0.0586927	0.0259255	0.0382853
Scaffold109:186482-186769	0	0	0.117516	0	0.0355442	0	0	0	0.0127618
Scaffold1092:113308-113677	0.0453125	0.0303433	0.0335761	0	0.0236962	0	0	0	0
Scaffold1092:164850-165092	0	0	0.335761	0	0.0473923	0	0.0234771	0	0
Scaffold1092:178684-179137	0	0.0151717	0.0503642	0.191729	0.130329	0.166388	0.105647	0.155553	0.0638089
Scaffold10:928855-929113	0	0	0	0	0.0236962	0.0356546	0.0469541	0.0518509	0.0127618
Scaffold1093:177253-177453	0.196354	0.121373	0.235033	0.242856	0.201417	0.166388	0.211294	0.194441	0.178665
Scaffold109:38579-38908	0.196354	0.09103	0.151093	0.0894734	0.568708	0.867595	0.680835	0.544435	0.21695
Scaffold109:39137-39321	0	0.0151717	0	0.0127819	0.0355442	0.0237697	0	0.0777764	0
Scaffold109:39880-40113	0.0453125	0.045515	0.0167881	0	0	0.0118849	0.0469541	0	0
Scaffold109:409043-409457	0	0	2.535	0.485713	0	0	1.92512	0	0.165903
Scaffold1094:152402-152595	0	0.0151717	0.218245	0.0383458	0.0236962	0.0356546	0.0117385	0.0129627	0.0127618
Scaffold1094:153738-154143	0	0	0.184669	0	0.0118481	0.0237697	0.0234771	0.0388882	0.0127618
Scaffold1094:166066-166461	0.105729	0.0606867	0.117516	0.166165	0.0710885	0.118849	0.0704312	0.155553	0.0255236
Scaffold1094:171306-171481	0.0453125	0.0606867	0.201457	0	0.0710885	0.0237697	0.0117385	0.0129627	0.0510471
Scaffold1094:210605-211075	0	0.0151717	0.167881	0.127819	0.0355442	0.0356546	0.0469541	0.207404	0
Scaffold1094:212743-213125	0	0.257918	0.621158	0.293984	0.0118481	0	0.0117385	0.0518509	0
Scaffold1094:219290-219710	0	0.227575	0.537218	0.242856	0	0	0	0.0259255	0
Scaffold109:535993-536388	0	0	0.0671522	0	0.0118481	0.0118849	0.0117385	0	0.0255236
Scaffold109:577427-577850	0	0.0303433	0	0	0.0473923	0.083194	0.0704312	0	0.0127618
Scaffold109:578064-578150	0.0151042	0.0606867	0.0671522	0	0.0473923	0.0118849	0.0234771	0.0518509	0.0127618
Scaffold1096:241881-241983	0.0453125	0	0.0671522	0.102255	0.0592404	0.083194	0.0352156	0.0518509	0.0765707
Scaffold109:679922-680133	0.0302083	0.0151717	0.0167881	0.0127819	0.0473923	0.0713092	0.152601	0.103702	0.153141
Scaffold109:696634-696980	0.0151042	0.166888	0.436489	0.166165	0.154025	0.285237	0.187817	0.453696	0.306283
Scaffold109:699401-699559	0	0.045515	0.117516	0	0	0.0237697	0.0117385	0.0388882	0.0382853
Scaffold109:700672-701036	0	0.0303433	0.0503642	0.0255638	0	0	0.0117385	0.0777764	0
Scaffold109:701425-702083	0	0	0.134304	0.0766915	0.0473923	0.118849	0.0821697	0.71295	0.102094
Scaffold1097:150445-150954	299.047	239.864	14.891	25.0781	38.1034	53.8622	66.6397	67.3673	76.124
Scaffold109:724083-724124	0.0302083	0.0151717	0.100728	0.0127819	0	0	0.0352156	0.0259255	0.0255236
Scaffold109:729609-729876	0	0	0.218245	0.0127819	0.0473923	0.0356546	0.0117385	0.0129627	0.0510471
Scaffold109:732509-732901	0	0	0	0	0	0	0.0352156	0.0129627	0.0255236
Scaffold1097:65333-65825	0.0604166	0.0303433	0	0.0127819	0.0118481	0	0	0.116665	0.0255236
Scaffold1098:49133-49481	0	0	0.0167881	0	0.0236962	0.0237697	0.0821697	0.0648137	0.229712
Scaffold1098:90549-90870	0	0	0	0.0255638	0.0118481	0.0356546	0.0821697	0.103702	0.0765707
Scaffold1098:91608-91902	0	0	0.100728	0	0.0118481	0	0.0352156	0.0259255	0.102094
Scaffold1099:58563-58884	0	0.045515	0.0167881	0.0127819	0.0118481	0.0356546	0	0.0648137	0.0127618
Scaffold1099:71661-71924	0.0151042	0	0.0335761	0.677442	0.260658	0.261467	0.293463	0.596286	0.191427
Scaffold1100:125562-125959	0.18125	0.106202	0.0167881	0.0127819	0.0236962	0.0237697	0.0352156	0.0129627	0.0127618
Scaffold110:1000395-1000886	15.4969	12.5015	5.624	4.86991	4.45488	4.51625	4.87149	5.08139	4.33901
Scaffold110:1007494-1007742	0	0	0	0.0894734	0	0.0237697	0	0.0648137	0
Scaffold1101:53703-54077	0	0	0.100728	0.0511277	0.165873	0.261467	0.0939083	0.168516	0.127618
Scaffold1:101849-102131	0.0453125	0	0.0167881	0.0255638	0.0236962	0.0118849	0.0117385	0.0129627	0.0127618
Scaffold1102:155706-155982	0	0	0	0.0383458	0.0473923	0.0356546	0.0234771	0.0129627	0.0382853
Scaffold1102:156256-156741	0.0302083	0.0151717	0.335761	0.178947	0.236962	0.356546	0.211294	0.194441	0.306283
Scaffold110:220083-220448	0	0	0	0	0	0.0475395	0	0	0.0127618
Scaffold110:221297-221610	0	0	0.0335761	0.0639096	0.0829366	0.0356546	0.0117385	0.0907391	0.0382853
Scaffold110:250225-250640	0	0	0.151093	0	0.0473923	0.0118849	0.0234771	0.0259255	0.0893325
Scaffold1:1027596-1027957	0	0.09103	0.167881	0.0894734	0.130329	0.118849	0.0586927	0.14259	0.114856
Scaffold1:1029417-1029697	0	0	0	0	0.0236962	0.0237697	0.0352156	0.0259255	0.0127618
Scaffold1:1031528-1031559	0	0	0	0	0.0118481	0	0.0117385	0.0388882	0.0510471
Scaffold1103:210731-211465	0.0604166	0.0606867	0.52043	0.293984	0.189569	0.237697	0.187817	0.349994	0.0893325
Scaffold1103:212095-212421	0	0	0.0167881	0.0255638	0.0473923	0.083194	0.0234771	0	0
Scaffold1103:213408-213802	0	0.0151717	0	0.0127819	0.130329	0.130733	0.0939083	0.0129627	0.0382853
Scaffold1103:222136-222529	0	0.0606867	0.705098	0.230075	0.0118481	0	0	0.0518509	0
Scaffold1103:41106-41942	49.7682	38.6574	12.4064	6.25036	8.3292	10.4706	12.1611	11.5239	9.8521
Scaffold110:344270-344929	71.2161	39.5222	31.4944	44.4939	50.0818	61.9083	64.2567	52.1361	96.5301
Scaffold1103:6356-6491	0.0604166	0	0	0.0255638	0	0.0356546	0.0234771	0.0388882	0.0382853
Scaffold1103:8602-8940	0.0755208	0.121373	1.07444	0.0127819	0.0473923	0.0118849	0.0352156	0.0777764	0
Scaffold110:391131-391303	0	0.0303433	0.268609	0.178947	0.0236962	0.0356546	0.0586927	0.0648137	0.0638089
Scaffold1104:134684-135132	0	0	0.318973	0.345112	0.213265	0.106964	0.0586927	0.129627	0.14038
Scaffold1104:180609-181009	0	0	0.0671522	0.0511277	0.0236962	0.0356546	0.0234771	0.0259255	0.0382853
Scaffold1104:186692-186924	0	0.0606867	0.0167881	0	0	0.0118849	0	0	0.0127618
Scaffold1104:187921-188219	0	0.758583	1.46056	0.0766915	0.0829366	0.0594243	0.0586927	0.0777764	0.0382853
Scaffold1104:19308-19853	0	0.136545	0.369337	0.102255	0.106633	0.0237697	0	0.0518509	0.0127618
Scaffold1104:242163-242335	0	0	0.235033	0	0.0473923	0.0356546	0.0117385	0.0129627	0.0127618
Scaffold1104:261725-262003	0.0604166	0.0151717	0	0.0127819	0.0592404	0.0118849	0.0821697	0.0518509	0.0255236
Scaffold1104:276486-276854	0	0	0	0.0127819	0	0.0118849	0.0704312	0.0129627	0.0255236
Scaffold1104:277125-277677	0.0604166	0.0606867	0.0335761	0.0894734	0.0829366	0.178273	0.140862	0.181478	0.255236
Scaffold1:1042826-1043113	0.0453125	0	0	0	0.0118481	0.0950789	0.105647	0.0777764	0.229712
Scaffold110:428289-428672	0.226562	0.212403	0.167881	0.0127819	0.0355442	0.0594243	0.0352156	0.0907391	0.0638089
Scaffold110:429958-430406	0.0302083	0.09103	0.184669	0.421803	0.30805	0.237697	0.176078	0.207404	0.306283
Scaffold1104:310707-310873	0	0.0151717	0.184669	0	0.0118481	0.0237697	0	0	0.0127618
Scaffold1104:339650-339760	0	0	0	0	0.0710885	0.0594243	0.129124	0.0648137	0.0638089
Scaffold1104:368064-368349	0.196354	0.318605	0.0503642	0.0383458	0.0710885	0.106964	0.269986	0.168516	0.153141
Scaffold110:447118-447460	0.0755208	0.0758583	0.0671522	0.0255638	0.0118481	0.0237697	0	0.0259255	0.0510471
Scaffold1104:59018-59220	0	0	0.0503642	0.0639096	0.0236962	0.0594243	0.0469541	0.0648137	0.0510471
Scaffold110:466293-466448	0.0604166	0.0151717	0.0167881	0.0255638	0.0592404	0.0356546	0.0117385	0.0129627	0.0382853
Scaffold1105:133187-133536	0	0	0.0503642	0.0383458	0.0592404	0	0	0.0388882	0.0255236
Scaffold1:1051912-1052077	0.0151042	0.0151717	0.0839403	0.0255638	0	0	0	0	0.0127618
Scaffold1105:2569-2900	0	0.0303433	1.69559	2.73533	3.17529	3.94577	4.41369	5.21102	3.67539
Scaffold1105:43097-43463	0	0	0.100728	0	0.0118481	0	0	0	0
Scaffold110:558309-558648	0	0	0	0	0	0	0	0.28518	0
Scaffold1:1056543-1056881	0.090625	0.0606867	0.0839403	0	0	0.0356546	0.0234771	0	0.0255236
Scaffold1105:94983-95273	0	0	0	0	0	0	0.0704312	0.168516	0.0127618
Scaffold1:1060751-1061279	0	0.333777	2.31675	0.166165	0.0473923	0.0356546	0.0352156	0.0388882	0.0255236
Scaffold1106:108752-108798	0	0	0.0671522	0	0.0355442	0.0118849	0	0	0
Scaffold1106:109566-109819	0	0	0.0839403	0	0.0829366	0.0118849	0.0234771	0.0259255	0.0255236
Scaffold1106:111999-112301	0	0	0.0335761	0.0255638	0.0592404	0	0.0469541	0.0518509	0.0510471
Scaffold1106:14417-14441	0	0	0	0.0255638	0	0	0.0352156	0.181478	0.0127618
Scaffold1:1064274-1064490	0	0.0303433	0.453278	0.0255638	0.0236962	0	0.0234771	0.0129627	0.0127618
Scaffold110:650171-650455	0.0453125	0.106202	0.117516	0.0255638	0.0355442	0	0.0586927	0.0518509	0.0255236
Scaffold1:1065607-1066149	0	0.151717	1.10801	0.127819	0.0473923	0	0.0117385	0.0129627	0
Scaffold1:1066216-1066390	0	0	0.251821	0.0255638	0	0	0	0	0
Scaffold1:1066625-1066805	0	0.0303433	0.369337	0.0127819	0.0118481	0	0	0.0129627	0.0255236
Scaffold1106:93503-93859	0	0	0	0.0127819	0.0829366	0.0118849	0.0117385	0.103702	0.0255236
Scaffold1106:96672-96911	0	0	0.0671522	0.0383458	0	0.0475395	0.0352156	0	0
Scaffold110:696813-697047	0	0	0.100728	0	0.0236962	0	0.0117385	0	0.0382853
Scaffold1:1071134-1071456	0.0151042	0.0303433	0.302185	0.0255638	0.0236962	0.0118849	0	0.103702	0.102094
Scaffold110:714807-715094	0	0	0	0	0	0.0237697	0.176078	0.0648137	0.0127618
Scaffold1107:171825-171988	0	0	0	0	0.0473923	0.0237697	0	0.0648137	0.0255236
Scaffold1107:187937-188054	0	0	0	0	0.0236962	0.0118849	0.0117385	0.220366	0.0255236
Scaffold1107:205194-205281	0	0.0303433	0.151093	0.0639096	0.130329	0.118849	0.0586927	0.129627	0.153141
Scaffold1107:82928-83966	0.105729	0.18206	1.46056	1.72556	0.793821	0.297122	0.258248	0.388882	0.255236
Scaffold1107:85427-85812	0.105729	0.106202	0.100728	0.0127819	0.0118481	0.0356546	0.0234771	0.0129627	0
Scaffold1107:93529-94243	1.22344	0.9103	0.419701	0.166165	0.0118481	0	0	0.0777764	0.0510471
Scaffold110:80297-81009	34.0901	27.5973	22.9996	21.9721	14.6442	15.5929	17.0913	19.1978	14.7909
Scaffold110:804947-805086	0	0.0151717	0.218245	0.345112	0.0355442	0.0594243	0.0117385	0.155553	0.0638089
Scaffold1108:155966-156073	0	0	0.0671522	0.0766915	0.0236962	0	0	0.0648137	0
Scaffold110:81837-82143	0	0.0606867	0	0	0	0.0356546	0	0	0.0127618
Scaffold110:820182-820470	0.0453125	0.0151717	0.0335761	0	0.0118481	0.0356546	0.0234771	0.0259255	0.0255236
Scaffold1108:74029-74281	0	0.0151717	0.0167881	0.0383458	0.0592404	0.154503	0.234771	0.28518	0.548757
Scaffold110:89678-89959	0	0	0.0335761	0.0127819	0.0355442	0	0.0117385	0.0388882	0
Scaffold1109:154393-154486	0	0.0303433	0.0503642	0	0	0.0118849	0	0.0129627	0
Scaffold1109:181253-181531	0	0	0.134304	0	0.0236962	0.0118849	0	0	0.0127618
Scaffold1:1093281-1093384	0	0	0.0839403	0.0127819	0	0	0	0	0
Scaffold1109:37602-37770	0	0	0.0839403	0.0766915	0.0355442	0	0	0.0259255	0
Scaffold110:954036-954427	0	0.0151717	0.0167881	0.115037	0.118481	0.0356546	0.0352156	0.129627	0.0382853
Scaffold1109:54704-54797	0	0.045515	0.117516	0.0255638	0	0.0237697	0.0117385	0.0259255	0
Scaffold1109:55757-56136	0	0	0.0503642	0.0255638	0.0592404	0.0118849	0.0352156	0	0.0255236
Scaffold1109:57266-57687	0.18125	0.242747	0.184669	0.409021	0.0118481	0.106964	0.0704312	0.362957	0.191427
Scaffold1109:58253-58993	0	0	0.0839403	0.319548	0.30805	0.178273	0.152601	0.14259	0.102094
Scaffold1109:61080-61565	0	0	0.318973	0.33233	0.177721	0.202043	0.140862	0.168516	0.178665
Scaffold1109:66627-66987	0	0.0151717	0.117516	0.0383458	0.0236962	0	0.0352156	0.0388882	0.0765707
Scaffold1109:67645-67799	0	0.0303433	0.235033	0.0894734	0.0355442	0.0356546	0.0352156	0.0777764	0.0765707
Scaffold111:141056-141428	0.0151042	0	0.117516	0.178947	0.0355442	0.0118849	0	0.155553	0
Scaffold111:153702-153906	0	0	0.0839403	0.0383458	0.0473923	0.083194	0.0234771	0.0388882	0.0127618
Scaffold11:1158598-1158961	26.1453	17.6447	1.74596	3.92405	6.07807	5.68096	5.58754	4.99065	3.49673
Scaffold111:159442-159725	0	0	0.302185	0.153383	0.272506	0.106964	0.0586927	0.28518	0.0127618
Scaffold11:1162390-1162530	3.59479	2.30609	0.671522	1.40601	2.95017	2.40074	2.30075	2.24255	2.45026
Scaffold111:162710-163083	0	0	0.117516	0.0639096	0.0710885	0.0950789	0.176078	0.0777764	0.0127618
Scaffold1111:70079-70236	0	0	0.0167881	0.0511277	0.0592404	0.0950789	0.105647	0.0777764	0.0382853
Scaffold111:188690-188771	0	0.0151717	0.184669	0	0.0473923	0.0237697	0.0234771	0	0.0127618
Scaffold111:208443-208841	0	0	0	0	0.0118481	0.0237697	0	0	0.0382853
Scaffold111:215623-215798	0	0	0	0	0	0.0118849	0.0234771	0	0.0765707
Scaffold111:217342-217496	0	0	0.0671522	0.0127819	0	0.0237697	0.0821697	0.103702	0.0127618
Scaffold1112:42788-43272	0.0302083	0.0606867	0.117516	0.0766915	0.0710885	0.0475395	0.0821697	0.220366	0.293521
Scaffold11:124617-124999	0	0.166888	0.0167881	0.0766915	0.0118481	0	0.0234771	0.0129627	0.0255236
Scaffold1112:77399-77763	0	0	0.0839403	0	0	0	0.0117385	0	0.0255236
Scaffold1113:252504-252571	0.0604166	0.0303433	0.0167881	0.0255638	0.0710885	0.0950789	0.0352156	0.0259255	0.0255236
Scaffold1113:255127-255621	0	0.045515	0.0167881	0.881952	0.0473923	0.0237697	0.0352156	0.635174	0.0127618
Scaffold1113:283553-284466	253.901	166.828	12.9268	13.3443	19.8811	20.5252	21.3641	19.133	16.0288
Scaffold1113:42186-42428	0	0	0	0	0.0355442	0.0594243	0.0586927	0.0777764	0.0127618
Scaffold1113:65970-66173	0	0.0151717	0.134304	0.0127819	0.0236962	0.0356546	0	0	0
Scaffold1113:66245-66581	0	0	0	0.0127819	0.0355442	0.0950789	0.0469541	0	0.0510471
Scaffold111:386305-386357	0	0	0.0839403	0	0.0118481	0.0118849	0.0234771	0.0388882	0
Scaffold1114:66958-67100	0	0	0	0	0.0473923	0.0950789	0.0704312	0.0518509	0.102094
Scaffold111:469622-469739	0	0	0.0839403	0	0	0	0	0	0.0127618
Scaffold1115:108736-109120	0	0.0151717	0.0167881	0.153383	0.0592404	0.166388	0.117385	0.0777764	0.0638089
Scaffold1115:15544-15769	0	0.0151717	0	0	0.0355442	0.0713092	0	0.0388882	0.127618
Scaffold111:56440-56770	0.0302083	0.045515	0	0.0255638	0.0355442	0.0356546	0.0234771	0.0259255	0.0127618
Scaffold111:605059-605343	0	0	0.117516	0.0127819	0	0	0	0.0518509	0.561518
Scaffold111:650778-650848	0	0	0	0.0127819	0.0473923	0.0475395	0.0586927	0.0518509	0.0510471
Scaffold111:651426-651759	0	0	0.0167881	0.0255638	0.0355442	0.0118849	0.0117385	0.0388882	0
Scaffold111:667706-667924	0	0	0.0671522	0	0.0473923	0	0.0704312	0.0388882	0
Scaffold111:702802-702892	0.120833	0.0303433	0.0671522	0.0127819	0.0473923	0	0.0586927	0.0129627	0.0510471
Scaffold1117:105654-105971	0.0151042	0	0	0.0127819	0.0236962	0.0594243	0.0117385	0.0259255	0
Scaffold1117:170313-170630	0	0	0	0.0383458	0.0355442	0.0356546	0.0234771	0.14259	0.0510471
Scaffold1117:302307-302614	0	0	0.0839403	0	0.0355442	0.0118849	0.0234771	0	0
Scaffold1117:367825-368221	0	0	0	0	0.0355442	0.0594243	0.0939083	0.0518509	0.0382853
Scaffold1117:369310-369341	0	0	0.0335761	0	0	0.0356546	0.0117385	0.0129627	0.0382853
Scaffold1117:381646-382024	0	0.0151717	0.0839403	0.0511277	0.0947846	0.130733	0.211294	0.324068	0.484948
Scaffold1117:399264-399607	0	0	0.0167881	0.0255638	0.0236962	0.0475395	0.0352156	0.116665	0.0893325
Scaffold1117:405455-406251	0	0.0606867	0.251821	0.140601	0.0473923	0.0713092	0	0.0907391	0.0765707
Scaffold1117:408680-409139	0	0.333777	0.637946	0.0639096	0.0473923	0.285237	0.258248	0.479621	0.57428
Scaffold1117:410439-410771	0.211458	0.318605	1.57808	0.498495	0.343594	0.451625	0.493018	0.751839	0.561518
Scaffold1117:444820-444915	0	0	0.0839403	0	0.0829366	0.0356546	0.0469541	0.0777764	0.0127618
Scaffold1117:446803-447201	0	0	0.100728	0	0.0236962	0.0475395	0	0.0129627	0
Scaffold1117:460262-460639	0	0.0151717	0.0503642	0.0766915	0.0947846	0.0237697	0.0234771	0.14259	0
Scaffold1117:461779-462089	0	0.0303433	0.100728	0.0127819	0	0.0237697	0.0352156	0.0518509	0.0127618
Scaffold1117:462812-463079	0.0151042	0.0151717	0.117516	0	0.0710885	0.0475395	0.0117385	0.0518509	0.0127618
Scaffold1117:467364-467802	0	0.0606867	0.0839403	0.127819	0.260658	0.0950789	0.0939083	0.14259	0.0255236
Scaffold1117:490443-490762	0	0	0.0335761	0.0255638	0.0592404	0.0713092	0.0469541	0.0648137	0
Scaffold1117:71512-71556	0	0	0	0.0255638	0.0473923	0	0.0117385	0.0129627	0
Scaffold111:796479-796883	0	0	0.0335761	0.0383458	0.0236962	0	0.0469541	0.0259255	0.0638089
Scaffold111:806420-806755	0	0.0151717	0.0671522	0.0639096	0.0236962	0.0237697	0.0469541	0.116665	0.0127618
Scaffold1118:111416-111789	0	0.0151717	0.0335761	0	0.0118481	0	0.0117385	0	0.0638089
Scaffold1118:121769-121777	0	0	0.0167881	0.102255	0.0473923	0.0475395	0	0.0259255	0.0127618
Scaffold1118:151048-151445	0.090625	0.121373	0.705098	2.00676	6.17285	8.23621	9.4143	6.39063	8.81839
Scaffold1118:152469-152706	0	0	0	0.0127819	0.0473923	0.0356546	0.0469541	0.0518509	0.0638089
Scaffold1118:154275-154547	0	0	0	0	0.0118481	0.0594243	0.0704312	0.0648137	0.0255236
Scaffold1118:33691-33882	0.0151042	0.0606867	0.0839403	0.0383458	0.0829366	0.0950789	0.0821697	0.0648137	0.14038
Scaffold1118:375-746	21.4026	15.3386	13.5983	31.5458	13.8504	11.457	10.3064	14.8812	11.7281
Scaffold1118:89558-89914	0.226562	0.36412	0.822615	3.06766	5.94774	7.16657	6.914	5.62583	6.1767
Scaffold1119:142179-142628	0	0	0	0.0511277	0.0118481	0	0.0117385	0.0518509	0.0765707
Scaffold1119:145239-145536	0	0	0	0	0	0	0.0117385	0	0.204189
Scaffold1119:150766-151125	0	0	0	0.0383458	0.130329	0.0594243	0.0586927	0.116665	0.293521
Scaffold1119:169493-169889	0	0	0.0503642	0.102255	0.0473923	0.0356546	0	0.0777764	0
Scaffold1119:23543-23923	0	0	0.0503642	0	0.0236962	0	0.0234771	0.0259255	0.0127618
Scaffold1:1192388-1192734	0	0	0.235033	0	0	0.0118849	0.0117385	0.0648137	0.0127618
Scaffold1119:5536-5884	0.3625	0.18206	0.0167881	0	0	0	0	0	0
Scaffold1120:156239-156484	0	0	0.0335761	0	0.0118481	0.0237697	0	0.103702	0
Scaffold1120:224149-224316	0	0	0.100728	0.0255638	0	0.0356546	0.0586927	0.0259255	0.0638089
Scaffold1120:224340-224579	0	0	0.0167881	0.0383458	0.0710885	0.0237697	0.0469541	0.0777764	0.0510471
Scaffold1120:225079-225278	0.120833	0.0606867	0.0167881	0.0127819	0.0710885	0.0475395	0.152601	0.168516	0.0765707
Scaffold1120:22603-22916	0	0	0	0	0.0592404	0	0.0234771	0	0
Scaffold1120:24617-24947	0	0	0.0671522	0.0127819	0.0473923	0	0	0	0.0510471
Scaffold1120:31901-32009	0	0	0.285397	0	0.154025	0.0237697	0	0	0.0127618
Scaffold1120:64411-64444	0	0	0	0.0511277	0.0118481	0.0356546	0.0117385	0.0518509	0.0382853
Scaffold1120:92107-92285	0	0	0.134304	0.242856	0.213265	0.332776	0.493018	0.168516	0.765707
Scaffold1121:108003-108325	0	0	0	0.0255638	0	0	0	0.0648137	0.0765707
Scaffold1121:134131-134258	0.105729	0.0303433	0.0671522	0.0127819	0	0	0	0.0259255	0
Scaffold1121:151045-151167	0.0453125	0.151717	0.100728	0.0639096	0.0829366	0.0713092	0.0234771	0.129627	0.0127618
Scaffold11:222970-223341	0	0	0	0.0127819	0.0118481	0	0.0469541	0.0907391	0.0255236
Scaffold1122:40095-40344	0	0	0.0503642	0.0127819	0.0236962	0.0475395	0.164339	0.0648137	0.0893325
Scaffold112:305168-305581	0.0151042	0.0606867	0.0503642	0.0255638	0.0236962	0.0237697	0	0.0518509	0
Scaffold1123:141750-141968	0	0	0	0.0127819	0.0355442	0	0.0234771	0.0259255	0.0382853
Scaffold1123:16993-17282	0	0.0606867	0.0167881	0.0255638	0	0	0.0234771	0.0129627	0.0127618
Scaffold1123:5798-5899	0.0755208	0.18206	0.184669	0.127819	0.142177	0.118849	0.223032	0.129627	0.114856
Scaffold1124:101609-101667	0.0151042	0.0151717	0	0.0511277	0.0236962	0.0950789	0.0586927	0.0648137	0.0510471
Scaffold1124:42704-43108	0	0	0.0671522	0.0127819	0.0355442	0.0356546	0	0.0129627	0
Scaffold1124:51188-51454	0.0302083	0	0.0839403	0.178947	0.201417	0.083194	0.0234771	0.0388882	0.0893325
Scaffold1124:52384-53236	0	0.0151717	0.721886	0.345112	0.509467	0.546704	0.528234	2.60551	1.42932
Scaffold11:245400-245794	0	0	0.0671522	0.0766915	0.0236962	0.0356546	0.0117385	0.349994	0.0765707
Scaffold1124:55939-56207	0	0	0.0671522	0.0127819	0.0710885	0.0118849	0	0.375919	0
Scaffold112:480357-480756	0	0.0303433	0.0671522	0.0639096	0.0473923	0.0237697	0.0352156	0.0777764	0.0255236
Scaffold1125:112433-112494	0	0	0	0	0	0.0475395	0.0352156	0.0259255	0.0127618
Scaffold1125:161085-161331	0	0	0.0839403	0	0	0.0594243	0.0586927	0	0.0510471
Scaffold1125:162460-162858	0	0.0151717	0	0	0.0118481	0.0118849	0	0.0518509	0.0382853
Scaffold1125:166681-167120	0	0.0151717	0.318973	0	0.201417	0	0.0117385	0	0.0255236
Scaffold1125:17092-17412	0	0.0606867	0.134304	0.153383	0.390987	0.273352	0.187817	0.181478	0.114856
Scaffold1125:181565-181980	0	0	0.167881	0	0.0236962	0.0118849	0	0	0
Scaffold1125:189938-190057	0	0.0151717	0.167881	0	0.177721	0	0.0704312	0	0
Scaffold1125:19743-20122	0	0	0.0167881	0.0127819	0.154025	0.178273	0.0469541	0.0648137	0.0638089
Scaffold1125:199370-199700	0	0.0151717	0.335761	0	0.106633	0.0237697	0.0469541	0	0
Scaffold11:256191-256440	0	0	0.0503642	0	0	0.0118849	0.0234771	0	0
Scaffold1125:73052-73450	0	0	0	0.0766915	0	0.0594243	0.0352156	0.0777764	0.0255236
Scaffold1125:90578-91062	0	0.0758583	0.0335761	0.0255638	0.0473923	0.130733	0.117385	0.0777764	0.165903
Scaffold1125:92904-93210	0.0151042	0.0303433	0.218245	0.0255638	0.130329	0.0713092	0.140862	0.14259	0.102094
Scaffold1126:107310-107330	0.0453125	0.0758583	0.0167881	0.0127819	0.0236962	0.0237697	0.0117385	0.0129627	0.0255236
Scaffold1126:19815-20162	0.0151042	0.0303433	0.0503642	0.0383458	0.0118481	0.0594243	0.0586927	0.0518509	0.0255236
Scaffold1126:39888-40083	0	0.0151717	0.0503642	0.0127819	0	0	0.0117385	0.259255	0
Scaffold1126:64997-65258	0.0755208	0.0758583	0.0335761	0.115037	0.0710885	0.213928	0.387372	0.246292	0.35733
Scaffold1126:9809-10229	0.090625	0.0606867	0.0335761	0.242856	0.0947846	0.190158	0.0586927	0.0777764	0.0510471
Scaffold11275:10521-10554	0	0.045515	0	0.0255638	0.0355442	0	0	0	0.0255236
Scaffold1127:76535-76909	0.0453125	0	0.0335761	0.0511277	0.0236962	0.0713092	0.0821697	0.0259255	0.0638089
Scaffold1127:94962-95328	0	0.0151717	0.134304	0.0383458	0	0	0.0117385	0	0.0127618
Scaffold1128:153025-153309	0	0	0.100728	0.178947	0.0355442	0.0356546	0.0352156	0.0259255	0
Scaffold1129:152735-153428	0	0.045515	0.0167881	0.0127819	0.0473923	0.0118849	0.0586927	0.0648137	0.0510471
Scaffold1129:185799-185967	0	0.045515	0.570794	0.0383458	0	0.0356546	0.0469541	0.0259255	0
Scaffold1129:207090-207245	0	0.0151717	0.184669	0.0383458	0.0355442	0.249582	0.0939083	0.0129627	0.153141
Scaffold1129:208903-209157	0	0	0.0503642	0.0255638	0	0	0	0	0.0127618
Scaffold1129:247263-247426	0	0	0.0167881	0	0.0118481	0.0237697	0.0234771	0.103702	0.0382853
Scaffold1129:255019-255381	0	0	0	0	0	0	0.0352156	0	0.0638089
Scaffold1129:256799-257144	0.0151042	0	0	0	0	0.0118849	0.0234771	0	0.0510471
Scaffold11:293542-293870	0	0.0151717	0.0503642	0	0.0355442	0	0.0234771	0.0777764	0.0638089
Scaffold11:294559-295197	0.0151042	0.18206	0.453278	0.319548	0.24881	0.297122	0.234771	0.583323	0.382853
Scaffold1130:22499-23028	0	0.151717	1.00728	0.856388	0.722733	0.962674	0.727789	0.725913	0.612566
Scaffold113:1021803-1021923	0	0.0151717	0.0503642	0	0.0236962	0	0	0	0.0893325
Scaffold113:1092217-1092373	0.0151042	0	0.100728	0.115037	0.0592404	0.249582	0.246509	0.246292	0.319045
Scaffold113:1173414-1173612	0	0.0303433	0.0335761	0.0127819	0.201417	0.083194	0.0821697	0.0518509	0.0765707
Scaffold113:1177236-1177448	0	0	0	0.0255638	0.106633	0.154503	0.0704312	0.103702	0.0510471
Scaffold113:1227033-1227300	0	0	0.285397	0.127819	0.0236962	0.0118849	0	0.14259	0
Scaffold113:1227619-1227993	0	0	0.0671522	0.0255638	0.0355442	0.0118849	0	0.116665	0
Scaffold113:1242060-1242322	0.0453125	0.0303433	0.0335761	0.0127819	0.0236962	0	0	0.0907391	0.0127618
Scaffold11313:163-246	0.0755208	0.106202	0.134304	0.0639096	0.0236962	0	0.0117385	0	0.0127618
Scaffold1131:87407-87790	0	0	0.0167881	0.0639096	0.213265	0.202043	0.0352156	0.0777764	0.0255236
Scaffold1132:29519-29730	0	0	0.167881	0	0.0355442	0	0	0	0
Scaffold11:323016-323486	0	0	0.0335761	0.153383	0.118481	0.142618	0.105647	0.220366	0.127618
Scaffold1132:44528-44846	0.0151042	0.0151717	0	0.0383458	0.0473923	0.0237697	0	0	0.0255236
Scaffold11:325134-325280	0	0	0.117516	0.230075	0.225114	0.178273	0.0821697	0.0518509	0.0638089
Scaffold11:326798-327273	0	0	0.117516	0.396239	0.379139	0.237697	0.176078	0.194441	0.127618
Scaffold1132:87001-87229	0	0	0.134304	0.0639096	0.0592404	0.142618	0.246509	0.0648137	0.0893325
Scaffold1133:47071-47389	0	0	0.0671522	0.102255	0.0592404	0.142618	0.105647	0.207404	0.0765707
Scaffold1133:88479-88741	0	0	0	0.0639096	0	0	0.0234771	0.0388882	0.0510471
Scaffold11:343585-343636	0	0	0	0	0.0118481	0.0356546	0.0234771	0.0259255	0.0638089
Scaffold113:515325-515670	0	0	0.100728	0	0	0.0237697	0.0234771	0	0
Scaffold113:532442-532763	0	0.045515	0.0671522	0.0383458	0.0473923	0.0475395	0.0821697	0.103702	0.0382853
Scaffold1135:34753-34986	0.196354	0.18206	0.117516	0.0639096	0	0	0	0.0129627	0
Scaffold1136:101406-101774	0	0.0151717	0	0	0	0	0.0469541	0.0129627	0.0255236
Scaffold1136:121296-121684	0	0.0758583	0.0167881	0.0639096	0	0.106964	0.0704312	0.181478	0.191427
Scaffold1136:128243-128573	0	0	0	0	0.0118481	0.0356546	0.0234771	0.0129627	0.165903
Scaffold1136:192588-192819	0.105729	0.045515	0.0335761	0.0383458	0	0.0356546	0.0469541	0.349994	0.178665
Scaffold1136:42644-43022	0	0.151717	0.100728	0.33233	0.284354	0.178273	0.211294	0.28518	0.344568
Scaffold1136:58787-59093	0	0	0	0	0	0	0	0.155553	0
Scaffold1136:59838-60122	0	0	0.0335761	0.140601	0.0473923	0.0950789	0.0469541	0.0648137	0.0127618
Scaffold113:667967-668381	0.0151042	0.0151717	0.117516	0.0511277	0.213265	0.166388	0.105647	0.116665	0.178665
Scaffold1136:69669-70321	0	0	0.0335761	0.0894734	0.0236962	0.118849	0.117385	0.0518509	0.0382853
Scaffold1136:70446-70848	0	0.0151717	0.167881	0.33233	0.343594	0.261467	0.258248	0.0648137	0.14038
Scaffold113:695613-695744	0	0.136545	0.0503642	0.0511277	0	0.0118849	0.0117385	0	0.0127618
Scaffold113:781299-781328	0	0.0303433	0.0335761	0	0	0	0	0.116665	0
Scaffold113:784062-784410	0	0.36412	0.201457	0	0.0118481	0	0	0	0
Scaffold1138:11485-11810	0	0.045515	0.0839403	0	0.0473923	0	0.0234771	0	0.0127618
Scaffold1138:20222-20526	0.0302083	0.0151717	0.0839403	0.153383	0.0236962	0.0118849	0.0234771	0.194441	0
Scaffold1138:33359-33612	0.0151042	0.0151717	0	0.0766915	0	0	0	0.116665	0
Scaffold113:908371-908708	0	0.0151717	0.0167881	0.0894734	0.0118481	0.0118849	0.0117385	0.0777764	0
Scaffold1139:121993-122275	0	0.045515	0.0503642	0.127819	0.189569	0.237697	0.176078	0.155553	0.114856
Scaffold113:914264-914676	0	0.121373	0.335761	0.230075	0.118481	0.190158	0.140862	0.220366	0.165903
Scaffold113:915363-915837	0	0.0303433	0.117516	0.127819	0.201417	0.154503	0.140862	0.168516	0
Scaffold113:920974-921390	0	0.0758583	0.68831	0.204511	0.225114	0.154503	0.187817	0.479621	0.114856
Scaffold113:929120-929656	0.0302083	0.288262	0.637946	0.0383458	0.0355442	0.0356546	0.0704312	0.14259	0.0893325
Scaffold113:930020-930388	0	0.166888	0.335761	0.178947	0.0710885	0.154503	0.140862	0.181478	0.14038
Scaffold113:930957-931205	0	0.045515	0.302185	0.0766915	0.0473923	0.0237697	0	0	0.0127618
Scaffold113:932818-933319	0	0.106202	0.453278	0.140601	0.0592404	0.154503	0.117385	0.28518	0.0893325
Scaffold113:934746-935041	0	0.0303433	0.352549	0.0255638	0.0473923	0.0950789	0.0704312	0.14259	0.114856
Scaffold113:935216-935762	0	0.36412	1.5445	0.370676	0.402835	0.368431	0.293463	0.80369	0.255236
Scaffold113:935980-936125	0	0	0.251821	0.0255638	0.0355442	0.106964	0.0704312	0.0777764	0
Scaffold113:992319-992738	0.407812	0.288262	0	0.0383458	0.225114	0.213928	0.305202	0.272217	0.165903
Scaffold1140:146297-146523	0.151042	0.045515	0	0.0127819	0.0947846	0.166388	0.105647	0.155553	0.114856
Scaffold1140:152461-152834	0.0151042	0	0	0.0255638	0.118481	0.0237697	0.105647	0.0648137	0.0510471
Scaffold1140:157167-157496	0	0.0151717	0	0	0.0236962	0.130733	0.0469541	0.0518509	0.0893325
Scaffold1140:161040-161397	0	0	0	0.0255638	0.130329	0.118849	0.0704312	0.0518509	0.0638089
Scaffold1140:162148-162405	0	0	0	0.0127819	0.0118481	0.0356546	0.105647	0.0648137	0.0127618
Scaffold1140:189574-189612	0	0	0.0839403	0	0.0118481	0.0356546	0.0117385	0.0648137	0
Scaffold1140:34274-34649	0	0.106202	0.0335761	0.102255	0.0829366	0.0475395	0.0704312	0.0777764	0.0382853
Scaffold1140:36333-36756	0	0.166888	0.268609	0.178947	0.177721	0.118849	0.152601	0.194441	0.153141
Scaffold1140:37857-38289	0.453125	0.439978	0.151093	0.242856	0.0473923	0.083194	0.0586927	0.181478	0.0510471
Scaffold114:1010625-1010782	0	0	0	0	0.0236962	0.0950789	0.0586927	0.0259255	0
Scaffold114:1022422-1022795	0.0302083	0	0	0.0255638	0	0.0118849	0.0939083	0.0648137	0.0765707
Scaffold114:1053903-1054090	0.0151042	0	0.0839403	0.0383458	0.0118481	0.0237697	0.0586927	0.0259255	0.0127618
Scaffold114:1302742-1303052	0	0	0	0.0127819	0	0.0475395	0	0	0.0127618
Scaffold1142:135060-135450	0.0755208	0.0758583	0.0839403	0.0766915	0	0.0237697	0	0	0.0255236
Scaffold1142:173798-174130	0	0	0	0.102255	0	0.0118849	0	0.0129627	0
Scaffold1142:18170-18562	0	0	0	0	0	0	0.0586927	0.0388882	0.0255236
Scaffold1142:209834-209989	0.0151042	0.0151717	0.0335761	0	0	0.0475395	0.0469541	0.0259255	0.0255236
Scaffold1142:254397-254784	0	0	0	0.0127819	0.0236962	0.0237697	0.0352156	0.0648137	0.127618
Scaffold1142:257597-257831	0	0.0303433	0.0167881	0.0766915	0.0592404	0.106964	0.0469541	0.155553	0.0893325
Scaffold1142:270847-271203	0.0151042	0.0151717	0.0671522	0.26842	0.177721	0.190158	0.0821697	0.0648137	0.0127618
Scaffold1142:271769-271874	0	0	0	0	0.0236962	0.0594243	0.0469541	0.0388882	0
Scaffold1142:292002-292324	0	0	0	0.0127819	0.0236962	0.0475395	0.117385	0.0907391	0.0255236
Scaffold1142:29371-29910	0.0755208	0.106202	0.0167881	0.472931	0.0710885	0.166388	0.223032	0.362957	0.319045
Scaffold1142:32803-32915	0	0	0	0	0.0355442	0.0475395	0.0234771	0.0777764	0.0255236
Scaffold1142:33239-33812	0	0	0	0.0766915	0.142177	0.320891	0.446064	0.220366	0.370092
Scaffold1142:339064-339110	0.0453125	0.045515	0.184669	0.0255638	0.0473923	0	0.0469541	0.0129627	0.0255236
Scaffold1142:34558-35183	0	0.0151717	0.0167881	0.230075	0.0947846	0.178273	0.223032	0.388882	0.433901
Scaffold1142:355864-356093	0	0	0	0.102255	0.0118481	0	0	0.116665	0
Scaffold1142:36092-36551	0.0302083	0.0758583	0.151093	0.894734	0.154025	0.202043	0.199555	1.80182	0.395615
Scaffold1142:92170-92192	0	0	0	0	0	0.0118849	0	0.0518509	0.0510471
Scaffold114:296804-297243	0.0151042	0	0.302185	0.0255638	0.106633	0.0713092	0.0586927	0.0259255	0.0638089
Scaffold1142:97244-97602	0	0	0.0671522	0.0127819	0.0118481	0.0237697	0.0234771	0.0388882	0.0382853
Scaffold114:308199-308250	0	0	0.0335761	0.0383458	0	0.0118849	0	0	0.0255236
Scaffold114:310379-310774	0	0	0.0503642	0	0.0473923	0	0.0117385	0.0388882	0.0255236
Scaffold1143:111383-111687	0	0.0303433	0.184669	0	0.0236962	0	0	0	0
Scaffold114:311802-311837	0	0.0303433	0	0	0.0592404	0.0237697	0.0117385	0.0388882	0.0127618
Scaffold114:328295-328600	0	0.0758583	0.0671522	0.0511277	0.0710885	0.0475395	0	0.116665	0.0255236
Scaffold114:330057-330816	0	0.197232	0.570794	0.204511	0.189569	0.0950789	0.164339	0.0777764	0.114856
Scaffold114:362820-363377	0	0.121373	0.134304	0.0511277	0.0118481	0.0713092	0.0469541	0.0259255	0.0765707
Scaffold11:436611-436798	0.0151042	0.0758583	0.52043	0.498495	0.331746	0.380316	0.363895	0.764801	0.319045
Scaffold1:1441192-1441414	0	0	0.0167881	0	0.0118481	0.0475395	0.0586927	0.0388882	0.0638089
Scaffold1144:16704-17252	0	0	0.268609	0.0383458	0.0355442	0.0475395	0.0234771	0.0129627	0.0255236
Scaffold1144:168417-168678	0	0	0.0503642	0.0127819	0.0355442	0	0	0	0
Scaffold1144:21005-21024	0	0	0	0.0127819	0.0118481	0.0118849	0.0469541	0.0907391	0.0382853
Scaffold1144:24297-24684	0	0	0.0671522	0.0127819	0.0829366	0.0356546	0.0352156	0.0648137	0.127618
Scaffold1144:3212-3613	0	0	0.167881	0.0127819	0.0710885	0.0118849	0.0469541	0.0129627	0.0255236
Scaffold114:464457-464564	0.0302083	0	0.0335761	0.0255638	0.0829366	0.0237697	0.0469541	0.0129627	0.0255236
Scaffold114:496124-496421	0	0	0.0167881	0.0511277	0.0710885	0.0475395	0.117385	0.557398	0.0382853
Scaffold1145:10369-10721	0.120833	0.045515	0.352549	0.306766	0.225114	0.225812	0.117385	0.362957	0.165903
Scaffold1145:165387-165733	0.151042	0.121373	0.0167881	0.127819	0	0.0356546	0.0821697	0.298143	0.229712
Scaffold1145:174976-175223	0	0	0	0.102255	0.0236962	0	0.0704312	0.0777764	0
Scaffold1145:18760-18789	0.0151042	0.0303433	0.100728	0.102255	0.0710885	0.0594243	0.0352156	0.0907391	0.0382853
Scaffold1145:77012-77167	0	0	0.0167881	0.102255	0.0829366	0.0237697	0.0234771	0.103702	0.0127618
Scaffold1145:78239-78444	0	0.0151717	0.0335761	0.0383458	0.0118481	0.0594243	0.0234771	0	0.0382853
Scaffold114:58352-58548	0	0	0	0	0	0.0356546	0.0234771	0.0129627	0.0382853
Scaffold1146:133053-133420	0	0.0151717	0	0.0127819	0.0118481	0	0.0352156	0.14259	0.0127618
Scaffold1146:82101-82413	0	0	0.0335761	0.0127819	0	0.0356546	0.0234771	0	0.0127618
Scaffold114:726199-726431	0	0.0151717	0.218245	0.0511277	0.0829366	0.083194	0.0117385	0.0259255	0
Scaffold114:730420-730595	0	0.106202	0.386125	0.166165	0.0947846	0.0356546	0.117385	0.0777764	0.0255236
Scaffold114:732278-732513	0	0.0303433	0.100728	0.0383458	0.0118481	0.0118849	0	0	0
Scaffold1147:35235-35384	0	0	0	0.0766915	0.0473923	0	0	0	0.0255236
Scaffold114:737422-737836	0	0.0151717	0.134304	0.0383458	0	0	0	0.0388882	0
Scaffold114:738012-738470	0	0	1.07444	0.140601	0.130329	0.273352	0.152601	0.168516	0.0510471
Scaffold114:738968-739162	0	0	0.0839403	0	0	0	0	0	0.0127618
Scaffold114:741221-741509	0	0.166888	0.621158	0.102255	0.225114	0.297122	0.105647	0.155553	0.0765707
Scaffold114:742066-742318	0	0.0303433	0.218245	0	0.0829366	0.0237697	0	0	0.0382853
Scaffold114:746664-747084	0	0.0151717	0.251821	0.0639096	0.142177	0.0594243	0.117385	0.207404	0.114856
Scaffold114:754853-755078	0	0	0.0167881	0.0127819	0.0355442	0.0118849	0.0469541	0.0518509	0.0638089
Scaffold114:755675-755871	0	0.0151717	0.0503642	0.0127819	0.0710885	0.0356546	0.0352156	0.0907391	0.0382853
Scaffold11:475827-476195	0.0151042	0	0.0839403	0.0127819	0.118481	0.130733	0.0586927	0.0259255	0.0255236
Scaffold114:760198-760547	0	0	0.0671522	0.0383458	0.0236962	0	0.0234771	0.0129627	0
Scaffold114:761920-762386	0	0	0.134304	0.115037	0.0947846	0.118849	0.105647	0.194441	0.0893325
Scaffold114:768096-768694	15.2401	11.576	8.46118	5.41953	1.77721	2.44828	2.08946	2.98143	1.37827
Scaffold114:774638-775414	0.211458	0.743412	0.990495	0.536841	0.24881	0.190158	0.223032	0.298143	0.0510471
Scaffold114:778661-778943	0	0.0606867	0.0671522	0	0	0	0	0	0
Scaffold1148:10475-10890	0.0302083	0.0758583	0.0671522	0.127819	0.0236962	0.0356546	0.105647	0.103702	0.204189
Scaffold1148:106012-106363	0	0	0	0.0511277	0.0710885	0	0	0.0259255	0
Scaffold1148:125047-125079	0	0.0151717	0	0.0127819	0.0355442	0.0356546	0	0.0388882	0.0127618
Scaffold1148:133386-133757	0	0	0.0503642	0.0127819	0.0236962	0.0356546	0.0117385	0.0259255	0.0255236
Scaffold1148:148520-148868	0	0	0	0.0127819	0.0473923	0.0237697	0.0586927	0.129627	0.102094
Scaffold1148:204737-204900	0	0	0.0839403	0.0255638	0.0710885	0.0475395	0.0352156	0.0259255	0.0765707
Scaffold1148:205351-205506	0	0	0	0.0127819	0.0118481	0.0356546	0.0821697	0.0259255	0.0510471
Scaffold1148:205582-206014	0	0	0.100728	0.191729	0.130329	0.0356546	0.0469541	0.0648137	0.0382853
Scaffold1148:206175-206295	0	0	0.184669	0.166165	0.0947846	0.083194	0.140862	0.0907391	0.14038
Scaffold1148:47488-47848	0	0	0.184669	0.0511277	0.236962	0.237697	0.199555	0.0907391	0.0893325
Scaffold1148:53442-53451	0	0	0	0.0255638	0.0236962	0.0475395	0.0469541	0.0259255	0.0510471
Scaffold114:857366-857745	0	0	0	0.0255638	0.118481	0.106964	0.0117385	0.194441	0.0127618
Scaffold1148:74127-74333	0.0151042	0.0151717	0.167881	0.0383458	0.0592404	0.083194	0.105647	0.14259	0.280759
Scaffold114:879826-880249	0	0	0	0.191729	0.0118481	0	0	0.298143	0
Scaffold1148:81809-82116	0	0	0	0.0127819	0.0118481	0.0356546	0.0586927	0.0777764	0.331806
Scaffold1148:9646-9962	0	0.0151717	0.184669	0.0639096	0.0355442	0.0237697	0.0117385	0.0518509	0.0382853
Scaffold1148:99197-99367	0	0	0	0.102255	0	0.0118849	0.0234771	0.0518509	0.0638089
Scaffold114:95505-95677	0	0	0.167881	0	0.0710885	0	0	0	0
Scaffold114:962303-962347	0	0	0	0	0	0.0356546	0.0352156	0.0129627	0
Scaffold1:1502230-1502680	0	0	0.184669	0.115037	0.106633	0.46351	0.528234	0.57036	1.19961
Scaffold1150:299591-299812	0	0	0.0503642	0	0	0.0118849	0.0234771	0	0
Scaffold1150:329693-329926	0	0	0	0	0	0.083194	0.0939083	0.0907391	0.14038
Scaffold1150:346647-347013	0	0.0151717	0.0503642	0	0.0473923	0.154503	0.0586927	0.0648137	0.114856
Scaffold1150:348037-348216	0	0	0	0	0	0.0475395	0.0352156	0.0388882	0.114856
Scaffold1150:373028-373405	0.0604166	0.045515	0.0839403	0	0.0355442	0	0.0117385	0	0.0127618
Scaffold1150:386144-386327	0	0	0.251821	0	0.0947846	0	0	0.0648137	0
Scaffold115:101864-102053	0	0	0.0503642	0.370676	0.0118481	0.0356546	0.0117385	0.116665	0.0127618
Scaffold1151:122856-123092	0	0.045515	0	0	0	0.0118849	0.0117385	0.0129627	0.0382853
Scaffold1151:130089-130494	0.105729	0.0606867	0	0.0127819	0.0236962	0.0237697	0.0352156	0.0518509	0.102094
Scaffold115:162405-162604	0.0453125	0.0303433	0.134304	0.0766915	0.0592404	0.0475395	0.0352156	0.0259255	0.0510471
Scaffold1151:68993-69246	0.0151042	0.0151717	0.0503642	0.0127819	0	0	0	0.0259255	0.0255236
Scaffold115:227188-227411	0	0	0.0335761	0.0511277	0.0118481	0.0594243	0.0117385	0.129627	0.0382853
Scaffold115:254358-254761	0.0151042	0.0151717	0	0.0127819	0.260658	0.154503	0.223032	0.116665	0.153141
Scaffold115:2733-3029	0	0	0	0.0127819	0.130329	0.0237697	0.0234771	0.0259255	0
Scaffold1153:123486-123996	0	0.18206	7.5882	10.8518	7.93821	9.0325	7.54788	7.98504	8.19306
Scaffold115:319606-320107	0	0	0.0167881	0	0.106633	0.344661	0.434326	0.440733	0.267997
Scaffold115:330657-331033	0	0.045515	0	0.0127819	0.0473923	0.0950789	0.0352156	0.0388882	0.0127618
Scaffold115:341942-342004	0	0.0303433	0.117516	0.0255638	0	0.0237697	0	0.0129627	0
Scaffold115:345386-345418	0	0	0.0503642	0.0255638	0	0	0.0117385	0	0.0255236
Scaffold115:353501-353939	0	0.0151717	0.705098	0.115037	0.106633	0.0118849	0.0117385	0.0129627	0
Scaffold115:408792-409155	0.120833	0.0606867	0.0671522	0	0.0236962	0	0	0	0
Scaffold1154:117877-117976	0	0	0.167881	0	0.0118481	0	0	0	0
Scaffold115:518126-518316	0	0.0151717	0	0	0	0.0594243	0.0352156	0	0.0382853
Scaffold115:527874-528001	0	0	0.100728	0	0.0118481	0	0.0117385	0	0
Scaffold115:579574-579831	0	0	0.0335761	0.102255	0.0236962	0.0237697	0.0234771	0.0907391	0
Scaffold1156:103263-103457	0	0.0151717	0.218245	0.0127819	0.0118481	0.0237697	0.0352156	0.0259255	0.0510471
Scaffold1156:105087-105579	0	0	0.117516	0.230075	0.0947846	0.0950789	0.293463	0.440733	0.701898
Scaffold1156:105915-106289	0	0	0.0335761	0	0	0	0.0117385	0.0259255	0.0255236
Scaffold1156:107022-107462	0	0.0303433	0	0.0255638	0.0355442	0.0594243	0.340418	0.246292	0.727422
Scaffold1156:115258-115363	0	0	0.0503642	0	0	0.0237697	0.0469541	0.0129627	0.0127618
Scaffold1156:125492-125890	0	0	0	0.0127819	0.0592404	0.0356546	0.0704312	0.220366	0.178665
Scaffold1156:131312-131480	0	0	0.0335761	0	0	0	0	0.0648137	0.0255236
Scaffold1156:133536-133937	0	0	0.0839403	0.0511277	0.0236962	0.0118849	0.152601	0.207404	0.293521
Scaffold1156:135131-135337	0	0.0303433	0	0	0	0.0118849	0.0234771	0.272217	0.165903
Scaffold1156:140013-140193	0	0	0.0167881	0	0	0.0237697	0	0.0129627	0.0382853
Scaffold1156:185274-185515	0	0.121373	0.0503642	0.0255638	0.0118481	0.0356546	0.0352156	0.0259255	0
Scaffold1156:187999-188347	0	0.0606867	0.151093	0.0766915	0.0236962	0.0475395	0.0469541	0.103702	0.0765707
Scaffold1156:188799-189244	0.0151042	0.0758583	0.151093	0.0127819	0.0592404	0.0118849	0.0821697	0.0518509	0.0127618
Scaffold1156:194530-194767	0	0.09103	0.151093	0.651878	0.746429	0.558589	0	0.0129627	0.267997
Scaffold1156:339285-339695	0	0	0	0.140601	0.130329	0.118849	0.0939083	0.0648137	0.0893325
Scaffold115:655539-655735	0	0	0	0.0766915	0	0	0	0.14259	0
Scaffold1156:93027-93500	0	0	0	0	0	0.0118849	0.0586927	0.0388882	0.331806
Scaffold1156:94674-94944	0	0	0	0	0	0.0356546	0.0117385	0.0648137	0.102094
Scaffold1156:97238-97625	0.0151042	0.0303433	0.0503642	0.0255638	0.0118481	0.0594243	0.211294	0.168516	0.178665
Scaffold115:70861-70941	0	0	0.100728	0.153383	0	0.0237697	0.0469541	0.116665	0.0382853
Scaffold1157:105384-105637	0	0	0.100728	0	0	0.0237697	0.0821697	0.0777764	0.102094
Scaffold1157:31167-31183	0	0	0	0	0.0236962	0	0	0	0.0382853
Scaffold115:741390-741716	0	0	0	0.0383458	0.0355442	0.0118849	0.0117385	0	0.0255236
Scaffold115:742387-742526	0	0.0151717	0.235033	0	0.106633	0.0356546	0.105647	0.0388882	0
Scaffold1157:64718-64950	0.271875	0.151717	0.386125	0.102255	0.296202	0.106964	0.152601	0.14259	0.127618
Scaffold115:7878-8273	0	0	0.0167881	0.0511277	0.0947846	0.0950789	0.0469541	0.0518509	0.0382853
Scaffold1157:92595-92701	0	0	0.0335761	0.0639096	0	0	0.0352156	0.0518509	0.0893325
Scaffold1:1579738-1579963	0	0.0303433	0.201457	0.217293	0.0118481	0.0118849	0.0117385	0.259255	0
Scaffold1:1581453-1581791	0	0.0303433	0.167881	0.102255	0.260658	0.297122	0.328679	0.298143	0.331806
Scaffold1158:162667-162799	0.0755208	0.0606867	0.0503642	0.0255638	0.0118481	0.0594243	0.0117385	0.0129627	0.0638089
Scaffold1158:167822-168109	0	0	0	0.0127819	0.0118481	0.0237697	0.0234771	0.155553	0.0510471
Scaffold1158:205384-205487	0	0	0	0.0127819	0.0592404	0.0237697	0	0	0.0510471
Scaffold115:821145-821302	0	0	0.100728	0.0127819	0.0355442	0	0.0117385	0.0129627	0.0382853
Scaffold1158:38731-38979	0	0	0	0	0	0	0	0.155553	0
Scaffold1:1586934-1587325	0	0.0151717	0.0839403	0	0.0236962	0.0237697	0	0.0129627	0
Scaffold1158:72591-72893	0.0453125	0.045515	0.0839403	0.0127819	0.0236962	0.0237697	0.0117385	0.0259255	0.0255236
Scaffold1:1589896-1590164	0	0.0303433	0.184669	0.102255	0.0947846	0.083194	0.199555	0.272217	0.165903
Scaffold1:1596169-1596363	0	0.0606867	0.0335761	0.0127819	0	0.0118849	0	0.168516	0.0255236
Scaffold11:604319-604603	0	0	0.0335761	0.0511277	0.0236962	0.0237697	0.0117385	0.0259255	0.0638089
Scaffold11:608089-608783	0	0.697897	2.45106	0.306766	0.130329	0.083194	0.117385	0.0259255	0.114856
Scaffold1161:142459-142760	0	0.0758583	0.0671522	0	0.0473923	0.0356546	0.0117385	0.0259255	0.0127618
Scaffold11:611828-612161	0	0.166888	0.251821	0.0766915	0.0118481	0	0	0.0648137	0
Scaffold11:612602-613218	0	0.09103	0.453278	0.102255	0.0118481	0.0118849	0.0234771	0.0777764	0.0255236
Scaffold1161:26821-26937	0.0453125	0.0606867	0	0.0766915	0.0710885	0.0118849	0.0352156	0.0518509	0.0510471
Scaffold11:614231-614675	0	0.09103	0.402913	0.0511277	0	0.0237697	0	0	0
Scaffold1162:19390-19689	0	0	0	0	0.0118481	0.0237697	0	0.0518509	0.0127618
Scaffold116:22081-22450	0	0	0.0167881	0	0.0355442	0.0237697	0	0.0388882	0
Scaffold1162:245695-246112	0	0	0.134304	0.0766915	0.0236962	0.0237697	0.0234771	0.0388882	0.0382853
Scaffold1162:298002-298426	29.9667	22.272	15.3107	15.8879	26.2198	27.0737	27.8086	25.5884	23.2392
Scaffold1:1628333-1628483	0	0.106202	0.0335761	0.0127819	0	0	0	0	0.0127618
Scaffold116:283600-283750	0	0	0.0335761	0.178947	0.0592404	0.130733	0.199555	0.220366	0.127618
Scaffold116:284867-285323	0	0	0.0335761	0.0383458	0	0.0594243	0.0234771	0.233329	0.14038
Scaffold116:286232-286499	0	0.0303433	0.755463	0.818043	0.995239	1.4143	0.892129	0.635174	0.35733
Scaffold1163:126665-127128	0	0.0758583	0.0839403	0.0383458	0	0	0	0	0
Scaffold1163:164911-165205	0	0	0	0.0511277	0.0355442	0	0.0117385	0.0518509	0
Scaffold116:414995-415245	1.32917	0.925472	0.218245	0.409021	0.781973	0.653667	0.856913	0.635174	0.599804
Scaffold1164:344921-345335	0	0.0151717	0.0335761	0.0255638	0.0118481	0.0118849	0	0.0648137	0.0127618
Scaffold116:443086-443433	1.19323	1.0165	0.134304	0.830825	0.225114	1.08152	9.40257	0	1.0337
Scaffold116:455831-456081	0.090625	0.0758583	0.0671522	0	0.0829366	0.0118849	0.0234771	0.0129627	0.0510471
Scaffold116:463975-464270	0	0	0.0167881	0.178947	0.0118481	0	0	0.0518509	0
Scaffold116:469581-469923	0	0	0	0.153383	0.0118481	0	0	0.0648137	0
Scaffold116:470896-470929	0.0453125	0.121373	0.0671522	0.0639096	0.0473923	0.0950789	0.117385	0.0907391	0.102094
Scaffold116:486180-486560	0.18125	0.09103	0.117516	0.102255	0.106633	0.118849	0.117385	0.155553	0.102094
Scaffold116:497817-498027	0	0	0.184669	0.0383458	0.177721	0.106964	0.152601	0.0777764	0.114856
Scaffold116:499487-500005	0.0755208	0.121373	1.37662	1.6233	1.68243	3.09006	4.37847	2.00922	3.38187
Scaffold116:504379-504705	0	0	0.0167881	0.0766915	0	0.0594243	0.0234771	0.0129627	0.0255236
Scaffold116:504919-505384	0	0	0.151093	0.0639096	0.165873	0.166388	0.176078	0.0648137	0.21695
Scaffold1165:123745-123868	0	0	0	0	0.0473923	0.0118849	0.0117385	0.0388882	0.0255236
Scaffold1165:138829-139101	0.0453125	0.0303433	0.0503642	0.217293	0.0947846	0.083194	0.0469541	0.0518509	0.0127618
Scaffold1165:219834-219969	0	0	0.201457	0	0.0236962	0	0	0	0.0255236
Scaffold1165:267758-268118	0	0	0.134304	0	0	0	0.0117385	0	0
Scaffold1165:271815-272105	0	0	0.0503642	0	0.0236962	0	0	0.155553	0
Scaffold116:552491-552754	0	0	0	0.153383	0	0	0	0	0
Scaffold1165:69349-69579	0	0	0	0.0383458	0.0236962	0.0356546	0.0939083	0.103702	0.0510471
Scaffold116:572339-572460	0	0	0.0335761	0.0127819	0.0355442	0.0118849	0	0.0388882	0
Scaffold116:588691-588833	0	0	0.117516	0	0.0118481	0	0	0	0
Scaffold1166:100328-100506	0	0.0151717	0.184669	0.115037	0.0236962	0	0.0117385	0.0129627	0.0127618
Scaffold1166:118691-118911	0.0151042	0	0.100728	0.0383458	0	0.0118849	0	0.0388882	0.0127618
Scaffold1166:119022-119382	0.0151042	0.0758583	0.100728	0.0511277	0.0236962	0.0356546	0.0821697	0.0518509	0.0638089
Scaffold1166:125278-125672	0.151042	0.18206	0.268609	1.36767	0.319898	0.487279	0.516496	1.89256	0.293521
Scaffold1166:126408-126705	0.211458	0.151717	0.167881	0.0894734	0.0592404	0.0594243	0.0234771	0.0777764	0.0255236
Scaffold1166:132718-133060	0	0.0151717	0.0671522	0	0	0.0237697	0	0	0.0127618
Scaffold116:620562-620660	0	0	0.0335761	0.0511277	0.0592404	0.0237697	0.105647	0.0518509	0.0255236
Scaffold1:1662452-1662817	0.090625	0.121373	0.151093	0.115037	0.0829366	0.0475395	0.0704312	0.103702	0.0638089
Scaffold1166:39255-39648	0	0	0.0167881	0.0383458	0.0592404	0.0237697	0.0234771	0.0259255	0.0510471
Scaffold1:16645-16784	0.090625	0.0151717	0.0839403	0.0127819	0	0	0	0.0129627	0
Scaffold116:653063-653428	0	0.0303433	0.0167881	0.306766	0.106633	0.142618	0.117385	0.414807	0.114856
Scaffold116:668465-668808	0	0	0.0167881	0.0127819	0.0473923	0.118849	0.0234771	0.0518509	0.0255236
Scaffold116:671993-672217	0	0	0	0.0127819	0.0118481	0.0594243	0.0469541	0.0388882	0
Scaffold116:675610-676038	0	0.0606867	0.151093	0.204511	0.0710885	0.0475395	0.0704312	0.103702	0.0382853
Scaffold116:679577-680017	0.498437	0.45515	0.235033	0.255638	0.0710885	0.0594243	0.164339	0.155553	0.102094
Scaffold116:680496-680638	0	0	0	0.0639096	0.0236962	0.0475395	0.0352156	0	0
Scaffold116:689689-689905	0	0.0151717	0	0.0383458	0	0.0118849	0	0.129627	0
Scaffold1166:90023-90425	0.453125	0.227575	0	0.0639096	0.0473923	0	0	0	0
Scaffold116:691812-692000	0	0	0.0671522	0.0255638	0.0236962	0.0118849	0	0.0259255	0
Scaffold116:698591-698918	0	0	0.0167881	0.0383458	0	0.0475395	0.0469541	0.583323	0.0893325
Scaffold1167:115236-115596	0.0604166	0.09103	0	0	0	0	0	0.0518509	0
Scaffold11673:1298-1375	0	0	0.0671522	0	0.0118481	0.0118849	0.0117385	0.0129627	0.0255236
Scaffold116:774627-774901	6.94791	4.53633	2.01457	2.99097	2.96202	4.99164	7.09007	5.06843	6.82755
Scaffold1168:104593-104865	0	0	0.251821	0	0.130329	0.0594243	0.0117385	0.0907391	0
Scaffold1168:114336-114513	0	0	0	0	0.0236962	0.118849	0.234771	0.129627	0.280759
Scaffold1168:13094-13296	0	0.0151717	0.386125	0.306766	0.118481	0.083194	0.31694	0.220366	0.331806
Scaffold1168:13832-14360	0	0.0151717	0.117516	0.0383458	0.177721	0.154503	0.117385	0.233329	0.102094
Scaffold1168:22983-23447	0	0	0.117516	0.0127819	0.142177	0.106964	0.140862	0.14259	0.178665
Scaffold1168:24253-24400	0	0	0.100728	0.0639096	0.189569	0.213928	0.129124	0.0518509	0.191427
Scaffold1168:27081-27441	0	0	0	0	0.0473923	0.190158	0.0469541	0.0388882	0.0638089
Scaffold1168:39086-39313	0.0151042	0	0.0671522	0.0511277	0.0118481	0.0594243	0.117385	0.505547	0.0255236
Scaffold1168:73563-73806	0	0.0151717	1.00728	0.127819	0.201417	0.083194	0.105647	0.0777764	0.153141
Scaffold1168:79455-80018	0.0151042	0.0151717	0.151093	0.370676	0.0710885	0.0713092	0.0586927	0.103702	0.0893325
Scaffold1168:80586-82270	0.0453125	0.0758583	2.13208	1.87894	0.710885	0.713092	0.680835	0.907391	0.957134
Scaffold1168:83572-83919	0.0151042	0.0606867	0.251821	0.0127819	0.0473923	0.0356546	0.0234771	0.0259255	0
Scaffold116:88471-88866	0	0	0.167881	0.115037	0.177721	0.0237697	0.0352156	0.0777764	0
Scaffold1168:85164-85851	0.0151042	0.242747	0.251821	0.0255638	0.0592404	0.0356546	0	0.0518509	0
Scaffold1168:86538-86912	0	0.09103	0.117516	0	0	0.0237697	0	0	0
Scaffold1168:98463-98788	0.0453125	0.0606867	0.0335761	0.0127819	0.106633	0.0356546	0.0352156	0.298143	0.0638089
Scaffold11:693674-694033	0	0.0151717	0	0.0639096	0	0	0.0469541	0.116665	0.0765707
Scaffold11:699094-699256	0	0	0	0.0511277	0.0355442	0.0237697	0.0117385	0.103702	0.0127618
Scaffold116:9982-10410	0	0.0758583	1.05765	1.03534	0.0829366	0.237697	0.129124	0.129627	0.0382853
Scaffold1170:113226-113701	0	0	0.0839403	0.0511277	0.118481	0.106964	0.0821697	0.0518509	0.0255236
Scaffold1170:114097-114278	0	0	0	0.0127819	0.0829366	0.0237697	0.0586927	0.0129627	0.0382853
Scaffold1170:120300-120648	0	0	0	0.153383	0.0236962	0	0.0117385	0.116665	0
Scaffold1170:257873-257977	0	0.045515	0	0	0	0	0	0.0259255	0
Scaffold1170:348996-349183	0.0604166	0.0303433	0.117516	0	0.0118481	0	0.0352156	0	0.0510471
Scaffold1170:45450-45800	0.498437	0.18206	0.318973	0.0894734	0.0829366	0.190158	0.305202	0.220366	0.191427
Scaffold1170:50046-50426	0.770312	0.713068	1.09122	1.50827	0.734581	0.344661	0.305202	0.414807	0.0893325
Scaffold1170:85058-85229	0.0151042	0.0303433	0.0671522	0.0383458	0.0118481	0.0118849	0.0352156	0.0129627	0
Scaffold117:1105722-1105815	0	0	0	0.0766915	0	0	0	0.0259255	0
Scaffold117:1106058-1106409	0	0	0	0.0639096	0	0.0118849	0	0	0
Scaffold11:71366-71424	0	0	0.0839403	0.0127819	0.0118481	0	0	0.0777764	0
Scaffold117:21585-21776	0	0	0	0.0383458	0	0.0118849	0	0.129627	0
Scaffold117:219287-219444	0	0	0	0	0.0473923	0.0713092	0.0352156	0.0388882	0.0127618
Scaffold117:220346-220541	0	0	0.0503642	0.0255638	0.0355442	0.154503	0.0234771	0.0388882	0.0255236
Scaffold117:22702-22813	0	0	0	0.0255638	0.0118481	0	0.0117385	0.116665	0.0127618
Scaffold117:234325-234504	0.0151042	0	0.0335761	0	0	0.0356546	0.0352156	0.0518509	0.0127618
Scaffold1172:56114-56501	0	0	0.0167881	0.0255638	0.0473923	0.0237697	0.0586927	0.220366	0.0127618
Scaffold117:285874-286504	0.845833	0.697897	0.402913	0.0255638	0.0118481	0	0.0352156	0	0.0638089
Scaffold117:331912-332136	0	0.0303433	0.352549	0	0.0118481	0	0	0	0.0255236
Scaffold1173:330732-330841	0.0302083	0.151717	0.0839403	0.0127819	0.0355442	0.0356546	0	0.0129627	0.0255236
Scaffold1173:70957-71318	0	0	0	0.0383458	0.0355442	0	0	0.0388882	0
Scaffold1:1740006-1740191	0	0	0	0	0.0710885	0.0237697	0.0586927	0.0259255	0.0893325
Scaffold117:412422-412619	0	0	0.0503642	0.0255638	0.106633	0	0.0352156	0.0388882	0.0510471
Scaffold117:412762-413153	0	0.045515	0.503642	0	0.118481	0.0237697	0.0704312	0.0907391	0.0765707
Scaffold1175:155416-155529	0	0	0.0167881	0.0127819	0.0118481	0.0118849	0.0234771	0.103702	0.0382853
Scaffold117:517062-517463	0	0	0.0671522	0.0127819	0	0.0237697	0.0234771	0.0129627	0
Scaffold117:537126-537454	0	0	0.0167881	0.0127819	0.0236962	0.0118849	0.0234771	0	0.0510471
Scaffold1176:110677-111044	0	0	0	0	0	0.0475395	0.176078	0.116665	0.472186
Scaffold1176:128137-128354	0	0	0	0	0.0236962	0.130733	0.0469541	0.0777764	0.14038
Scaffold1176:128720-129146	0	0	0	0	0	0.0118849	0.0469541	0.0518509	0.127618
Scaffold1176:4703-5057	0	0.045515	0.0671522	0.0511277	0.154025	0.0356546	0.0821697	0.0777764	0.0510471
Scaffold117:657286-657439	0	0.0303433	0.285397	0.0383458	0.0355442	0.0118849	0.0352156	0	0
Scaffold117:661626-662322	0.0302083	0.106202	0.0839403	0.0511277	0.0710885	0.0237697	0.105647	0.0388882	0.0893325
Scaffold1176:62675-63007	0	0	0	0.0127819	0	0	0	0.0518509	0.0127618
Scaffold1176:89645-90031	0	0.0151717	0.0839403	0	0	0	0	0.0259255	0
Scaffold1177:116151-116386	0	0	0.218245	0	0.177721	0.0713092	0.129124	0.103702	1.53141
Scaffold1177:12349-12683	0	0	0	0	0	0.0118849	0.0352156	0.0518509	0
Scaffold1177:132102-132448	0	0.0303433	0	0	0.0355442	0.0118849	0.0234771	0.0259255	0.0510471
Scaffold1177:135951-136174	0	0	0.218245	0.0511277	0.0592404	0.0475395	0.0704312	0.0518509	0.0382853
Scaffold1177:136472-136885	0.0151042	0.0606867	1.04086	0.447367	0.580556	0.570473	0.457803	0.453696	0.319045
Scaffold1177:161650-162042	0	0	0	0.0127819	0.0118481	0	0.0469541	0.388882	0.102094
Scaffold1177:164294-164617	0	0	0	0	0.0236962	0.0356546	0.0352156	0.0777764	0.0127618
Scaffold1177:169529-169940	0	0.0303433	0.0167881	0.524059	0.0236962	0.0118849	0.0117385	0.557398	0
Scaffold1177:181502-181882	0.0302083	0.0151717	0.0503642	0.115037	0.165873	0.118849	0.0821697	0.0518509	0.127618
Scaffold1177:316591-316978	0.0302083	0.045515	0.0167881	0	0.0236962	0.0356546	0.0352156	0.0518509	0.0510471
Scaffold1177:50108-50781	0	0	0	0.0894734	0.296202	0.427855	0.56345	0.557398	0.267997
Scaffold1177:59557-59718	0	0	0	0.0639096	0.0473923	0.0237697	0.187817	0	0.114856
Scaffold1177:83088-83177	0	0	0	0	0.0236962	0	0	0.0388882	0
Scaffold1178:121990-122178	0	0	0.0503642	0	0.0355442	0.0237697	0	0	0.0382853
Scaffold1178:189373-189709	0	0	0	0.0127819	0	0.0237697	0.0117385	0.440733	0
Scaffold1178:219993-220374	0.0453125	0.045515	0	0.0511277	0.0118481	0.0118849	0.0586927	0.0259255	0.0255236
Scaffold1178:220455-220965	17.687	23.4554	7.62178	15.0188	20.7578	22.7833	20.0142	19.7941	22.8564
Scaffold1178:52329-52947	0.468229	0.470322	0.554006	0.140601	0.284354	0.41597	0.539973	0.362957	0.421139
Scaffold1178:56086-56720	0	0.18206	0.302185	0.0639096	0.118481	0.0118849	0.0117385	0.0259255	0
Scaffold11:785842-786162	0	0	0.0503642	0	0.0355442	0.0475395	0.0352156	0.0388882	0.0127618
Scaffold117:912553-912759	0	0.0303433	0.335761	0	0.0592404	0.0118849	0	0	0.0127618
Scaffold117:931909-932135	0	0	0.117516	0	0.0355442	0.0118849	0.0117385	0.0388882	0
Scaffold117:995775-995856	0	0	0	0	0.0118481	0.0356546	0.129124	0.0388882	0.0382853
Scaffold117:996982-997519	0	0	0	0.0255638	0.0947846	0.178273	0.199555	0.155553	0.127618
Scaffold118:124308-124842	0	0.121373	5.59042	1.64887	2.34592	4.14782	4.2963	3.38327	2.6034
Scaffold11:812852-813007	0	0.045515	0.218245	0.127819	0.0473923	0.0475395	0.0821697	0.0907391	0.0382853
Scaffold118:129233-129465	0	0	0.302185	0.127819	0.0592404	0.0356546	0.0939083	0.103702	0.0638089
Scaffold118:130549-130985	0	0.0606867	0.503642	0.127819	0.0710885	0.0118849	0.0352156	0.0388882	0.0127618
Scaffold1181:318307-318584	0	0	0.0167881	0.153383	0.0118481	0	0.0117385	0.14259	0.0255236
Scaffold1181:322665-323040	0.0302083	0	0	0.0255638	0.0236962	0.106964	0.0234771	0.14259	0.0510471
Scaffold1181:329844-330016	0	0	0	0.0255638	0.0355442	0.0237697	0.0469541	0.0518509	0.229712
Scaffold118:133641-134273	0	0.0151717	0.486854	0.140601	0.0592404	0.0475395	0.0117385	0.14259	0.0255236
Scaffold1181:366830-367151	0.0302083	0.63721	0.100728	0.856388	0.0236962	0.0713092	0.117385	1.23146	0.127618
Scaffold118:138657-138663	0	0	0.0503642	0	0.0236962	0	0.0234771	0	0.0255236
Scaffold1181:387001-387304	0	0	0	0	0	0.0118849	0.0234771	0.116665	0
Scaffold1181:390994-391086	0	0	0	0	0.177721	0.083194	0.0939083	0.103702	0.0127618
Scaffold118:140326-140474	0	0	0.100728	0.0766915	0	0.0237697	0	0.0388882	0
Scaffold1181:42290-42571	0	0.0303433	0	0.0255638	0.0473923	0.0118849	0.0234771	0.0259255	0.0382853
Scaffold1181:62682-63075	0	0.0303433	0	0	0.0355442	0.0950789	0.0352156	0.0129627	0.0765707
Scaffold118:164113-164455	0	0	0.117516	0.0511277	0.0829366	0.0713092	0.0704312	0.103702	0.0382853
Scaffold118:165626-166108	0	0	0.268609	0.255638	0.260658	0.130733	0.140862	0.168516	0.127618
Scaffold118:166634-166840	0	0	0.0335761	0.0511277	0.0710885	0	0.0117385	0.0518509	0.0127618
Scaffold118:171811-172027	0	0	0.0671522	0	0.0592404	0.0118849	0.0117385	0.0259255	0
Scaffold1181:82021-82305	0.0151042	0	0	0	0	0.0713092	0.129124	0.103702	0.0127618
Scaffold118:183567-183794	0	0	0.0503642	0	0.0118481	0.0237697	0.0234771	0	0
Scaffold1182:187066-187279	0	0	0.151093	0	0.0118481	0	0	0	0
Scaffold1182:279252-279624	0	0	0.268609	0	0.0829366	0.0237697	0	0	0.0382853
Scaffold118:262923-263227	0	0.0151717	0.151093	0	0.0355442	0	0	0.0129627	0
Scaffold1183:104790-105105	0	0	0	0	0.0355442	0	0.0234771	0.0518509	0.102094
Scaffold1183:184203-184511	0	0	0	0	0	0	0.0352156	0.129627	0.0127618
Scaffold1183:203060-203513	0	0	0	0	0	0	4.36673	2.86476	28.5481
Scaffold1183:207163-207347	0	0	0	0	0.0236962	0.0475395	0.187817	0.0648137	0.204189
Scaffold118:355865-356171	0	0	0	0.0766915	0.260658	0.130733	0.140862	0.233329	0.0510471
Scaffold1184:142580-142957	0	0	0.0167881	0.0127819	0.0118481	0.0118849	0.0234771	0.0518509	0.0255236
Scaffold1184:19833-20154	0	0	0	0.0255638	0	0.0118849	0	0.0388882	0
Scaffold1184:27970-28277	0	0	0.0839403	0.204511	0.0592404	0.0356546	0	0	0.0255236
Scaffold1184:37300-37407	0	0	0.0671522	0.0127819	0.0236962	0.0118849	0.0352156	0.0518509	0.0255236
Scaffold118:468128-468549	0.0151042	0	0.0335761	0.0255638	0.284354	0.190158	0.187817	0.0907391	0.0765707
Scaffold118:469449-469823	0	0.0303433	0.0167881	0.166165	0.142177	0.332776	0.469541	0.518509	0.803992
Scaffold118:470320-470484	0	0	0	0.0127819	0.0710885	0.154503	0.199555	0.0907391	0.153141
Scaffold118:470823-471145	0	0	0.0671522	0	0.0118481	0.0237697	0.0234771	0.0259255	0.0255236
Scaffold118:472051-472448	0	0	0.0167881	0	0.0592404	0.0594243	0.0704312	0.0129627	0.0382853
Scaffold118:474326-474699	0	0.045515	0.0335761	0.370676	0.426531	0.46351	0.575188	0.764801	0.752945
Scaffold118:47621-47987	0.0755208	0.045515	0.0503642	0.0127819	0.0355442	0.0118849	0.0234771	0.0129627	0
Scaffold1185:3170-3313	0	0	0	0.0511277	0.0592404	0.0356546	0.0469541	0.129627	0.0382853
Scaffold118:551515-551833	0	0	0.151093	0	0.0118481	0	0	0	0
Scaffold118:572-989	0.105729	0.121373	0.117516	0.0766915	0.0355442	0.0475395	0.0117385	0.0129627	0.0127618
Scaffold118:575489-575750	0	0	0.117516	0.0383458	0.0947846	0.0475395	0.0939083	0.220366	0.0127618
Scaffold118:588652-588834	0	0	0	0.0255638	0	0.0237697	0.0352156	0.0388882	0.114856
Scaffold1186:126054-126191	0	0	0	0	0	0.0118849	0.0586927	0	0.0127618
Scaffold11:862641-862897	0	0	0.151093	0	0	0.0594243	0	0.0129627	0.0127618
Scaffold1186:60693-60913	0	0.0151717	0.0503642	0	0.0355442	0.0475395	0.0469541	0.0777764	0.0382853
Scaffold118:685681-686013	0.0604166	0.0758583	0.0167881	0	0.0236962	0.0237697	0.0117385	0	0
Scaffold118:698620-699019	0	0	0.0167881	0.140601	0.0118481	0.0237697	0.0117385	0.14259	0.0127618
Scaffold1187:10271-10632	0	0	0.151093	0.140601	0.0473923	0.0356546	0	0.0129627	0
Scaffold1187:150108-150272	0	0	0	0.0127819	0.0355442	0.0475395	0	0.0648137	0.0638089
Scaffold1187:152920-153326	0.090625	0.106202	0.0671522	0.0511277	0.189569	0.190158	0.105647	0.0648137	0.191427
Scaffold1187:37979-38493	0	0	0	0	0	0.0356546	0	0.311106	0.0382853
Scaffold1187:39139-39458	0	0	0.0167881	0.0383458	0.0236962	0.0118849	0.0117385	0.14259	0.0510471
Scaffold1187:39495-40021	0	0	0	0.0511277	0	0.0356546	0.0117385	0.28518	0.0382853
Scaffold1187:40750-41128	0	0	0	0	0	0	0.0117385	0.0648137	0
Scaffold1:1874728-1874764	0.0151042	0	0.0167881	0.0255638	0.0236962	0.0950789	0.0821697	0.0648137	0.0510471
Scaffold1187:52325-52783	0	0	0.285397	0.460149	0.130329	0.213928	0.340418	0.609248	0.982657
Scaffold1187:67750-68065	0.0151042	0	0.0167881	0	0.0118481	0.0356546	0.0117385	0.0259255	0.0255236
Scaffold1187:73508-73762	0	0.0151717	0.0839403	0.0383458	0.0118481	0.0237697	0.0234771	0.0648137	0.0255236
Scaffold1187:83687-83789	0.120833	0.136545	0.0167881	0	0.0118481	0	0.0234771	0	0.0510471
Scaffold1:1878649-1878999	0	0	0	0.0255638	0.0355442	0.0237697	0.0234771	0	0.0255236
Scaffold118:80392-80700	0	0	0	0.0127819	0.0355442	0	0.0117385	0.0259255	0.0893325
Scaffold1188:107302-107834	0	0.0303433	0.0167881	0.0127819	0.0118481	0.0594243	0.0117385	0.194441	0.0638089
Scaffold1188:113508-113551	0	0	0	0.0127819	0.0118481	0	0.0586927	0.0259255	0.0510471
Scaffold118:82822-83271	0.0151042	0	0.0335761	0.115037	0.0355442	0.142618	0.117385	0.246292	0.127618
Scaffold118:83767-84204	0	0.0151717	0.151093	0.690224	0.402835	0.558589	0.774743	1.04998	1.04647
Scaffold11:88419-88569	0	0	0.151093	0	0.0236962	0	0	0	0.0127618
Scaffold1188:44236-44283	0	0	0	0	0	0.0237697	0.0117385	0.103702	0.0638089
Scaffold118:84842-85340	0	0	0.0839403	0.0894734	0.130329	0.166388	0.281725	0.337031	0.293521
Scaffold1188:58787-59053	0	0	0	0	0.0236962	0.0356546	0	0	0
Scaffold118:92516-92870	0	0	0	0	0.0236962	0.118849	0.129124	0.194441	0.165903
Scaffold1189:39837-40206	0	0	0.0503642	0	0.0473923	0.0594243	0.0234771	0	0.0382853
Scaffold118:99848-100238	0	0	0	0.0255638	0	0.0118849	0.0352156	0.0259255	0.0255236
Scaffold1190:85420-85732	0	0.121373	0.856191	0.230075	0.568708	0.713092	0.692574	0.440733	0.49771
Scaffold119:1075322-1075511	0	0	0.0335761	0	0	0.0356546	0.0117385	0	0.0127618
Scaffold119:1096644-1096698	0	0	0	0.0639096	0.0710885	0.0356546	0.0234771	0.0518509	0
Scaffold119:1103326-1103606	0.0755208	0.0606867	0.218245	0.140601	0.236962	0.190158	0.152601	0.168516	0.0765707
Scaffold1191:142797-143175	0	0.0151717	0.167881	0	0.0118481	0.0475395	0.0234771	0.0648137	0.114856
Scaffold1191:219919-220064	0	0	0.218245	0	0.0118481	0.0118849	0	0	0
Scaffold1191:290016-290398	44.089	31.6026	3.35761	6.21201	11.2557	13.3586	12.2902	12.3405	14.4591
Scaffold1191:343248-343560	0.0151042	0.0151717	0.251821	0.230075	0.142177	0.213928	0.140862	0.349994	0.0765707
Scaffold1191:347166-347374	0	0.0303433	0.0503642	0.0766915	0.0710885	0.0356546	0.0234771	0.0388882	0.0127618
Scaffold1191:351572-351834	0.0302083	0.0303433	0.0335761	0.485713	0.106633	0.106964	0.140862	0.194441	0.178665
Scaffold1191:375386-375669	0	0	0.0167881	0.0127819	0	0.0356546	0.0234771	0.0129627	0.0127618
Scaffold1191:411493-411791	0	0	0	0.0127819	0.0592404	0	0	0	0.0127618
Scaffold1191:44088-44424	47.9859	33.7873	9.40131	9.66313	4.39564	4.80148	4.46064	6.07952	5.69175
Scaffold119:238691-238933	0	0.0303433	0	0.0255638	0.0118481	0	0.0117385	0.129627	0.0255236
Scaffold119:239542-239928	0	0	0	0.0383458	0	0	0.0586927	0.181478	0.0510471
Scaffold1192:54778-55064	0	0	0.251821	0.0127819	0	0.0118849	0.0117385	0.0129627	0.0127618
Scaffold119:371064-371164	0.3625	0.379292	0.134304	0.0639096	0.0592404	0.0237697	0	0	0.0127618
Scaffold119:374061-374418	0	0.0151717	0.0335761	0.0127819	0.0236962	0.0237697	0.0234771	0.0648137	0.0893325
Scaffold119:385265-385447	0	0	0.0335761	0.0255638	0	0.0118849	0.0234771	0.116665	0.0255236
Scaffold1194:118376-118631	0	0	0.0167881	0.0766915	0.142177	0.0356546	0.0586927	0.0777764	0.0255236
Scaffold1194:168733-168811	0	0	0	0.0894734	0.0236962	0.0237697	0.0117385	0.103702	0
Scaffold1194:22754-23104	0	0.09103	0.218245	0.217293	0.0236962	0.0237697	0.0352156	0.116665	0.0127618
Scaffold119:503461-503709	0	0	0.100728	0	0.0236962	0.0118849	0	0	0.0255236
Scaffold1195:74538-74672	0.0151042	0.0606867	0.117516	0.204511	0.0118481	0.0356546	0.0234771	0.544435	0.0638089
Scaffold1195:92377-92422	0	0	0	0.0639096	0	0.0118849	0	0.0648137	0.0127618
Scaffold119:624483-624727	0	0	0	0.0127819	0	0.0237697	0.0821697	0.155553	0.165903
Scaffold1196:254325-254402	0	0	0	0	0.0236962	0	0	0.0388882	0
Scaffold1196:260238-260341	0.0755208	0.0303433	0.0839403	0.0127819	0.0355442	0.0594243	0.0234771	0.0777764	0.0255236
Scaffold1196:91549-91937	1.31406	1.13788	0.486854	0.33233	0.343594	0.43974	0.622142	0.479621	0.523233
Scaffold1197:139804-140220	0	0.0151717	0.117516	0.0766915	0.0710885	0.0594243	0.0352156	0.0129627	0
Scaffold1197:140620-140948	0	0.0303433	0.251821	0.0255638	0.0118481	0	0	0.0388882	0
Scaffold1197:141607-142098	0.211458	0.166888	0.940131	0.881952	0.521316	0.309006	0.692574	0.440733	0.459424
Scaffold1197:142196-143044	0.0755208	0.09103	0.721886	0.86917	0.639796	0.202043	0.129124	0.505547	0.0638089
Scaffold1197:208366-208481	0	0	0.0839403	0	0	0	0.0117385	0.0129627	0.0638089
Scaffold119:725069-725506	0	0	0	0.0511277	0.0473923	0	0.0586927	0.0259255	0.0127618
Scaffold119:732812-732998	0	0	0	0.0127819	0.0473923	0	0	0.0518509	0.0127618
Scaffold1197:55969-56184	0	0	0.134304	0.0255638	0.0592404	0.0118849	0.0117385	0.0777764	0.0382853
Scaffold119:795289-796098	0	0	0.0335761	0.230075	0.272506	0.332776	0.187817	0.129627	0.331806
Scaffold119:799432-799742	0	0	0	0.0127819	0.0947846	0.0713092	0	0.0259255	0.0127618
Scaffold119:807897-808533	0	0.0606867	0.0671522	0.127819	0.0947846	0.178273	0.269986	0.0907391	0.14038
Scaffold119:811535-812082	0	0.0151717	0.0335761	0.0511277	0.284354	0.511049	0.457803	0.349994	0.35733
Scaffold1198:124299-124387	0.0755208	0	0.0167881	0.0894734	0.0592404	0.0950789	0.305202	0.116665	0.229712
Scaffold119:813053-813299	0	0	0.0167881	0.0383458	0.0829366	0.178273	0.340418	0.0518509	0.229712
Scaffold119:818163-818454	0	0	0	0	0.106633	0.213928	0.0821697	0.0259255	0.102094
Scaffold1198:190507-190920	0	0	0	0.0255638	0.0829366	0.0713092	0.0352156	0.0388882	0
Scaffold1198:191920-192239	0	0	0	0.0511277	0	0.0118849	0.0117385	0.0129627	0.0255236
Scaffold119:887768-887946	0.0302083	0	0	0.0766915	0.0355442	0.0118849	0.0117385	0.0259255	0.0127618
Scaffold1199:165179-165516	0	0	0	0	0.0118481	0.0475395	0	0.0388882	0.0638089
Scaffold1199:165670-165844	0	0.0151717	0.0167881	0.0127819	0.0473923	0.0356546	0.0939083	0.0388882	0.0127618
Scaffold1199:168168-168940	0	0	0	0.0127819	0.0710885	0.225812	0.0704312	0.272217	0.280759
Scaffold119:954095-954398	0	0	0	0.0511277	0.0592404	0.0118849	0	0.0129627	0.0510471
Scaffold119:961205-961583	0	0	0	0	0.0118481	0.0118849	0.0469541	0.0777764	0
Scaffold11998:185-506	0	0.0151717	0.100728	0.0255638	0.0592404	0.0118849	0.0586927	0.0777764	0
Scaffold1200:15603-15948	0	0	0.0335761	0.0511277	0	0	0.0117385	0.103702	0.0127618
Scaffold1200:18694-18991	0	0	0.0839403	0.0255638	0.0355442	0	0	0.0648137	0.0127618
Scaffold1200:21924-21991	0	0	0.0839403	0.0127819	0.0473923	0.0356546	0.0352156	0.0648137	0.0382853
Scaffold120:106001-106422	0	0.0303433	0.0671522	0.0383458	0.0947846	0.237697	0.0586927	0.220366	0.102094
Scaffold120:107734-108092	0	0.106202	0.0839403	0.102255	0.142177	0.190158	0.0704312	0.14259	0.0893325
Scaffold120:109137-109474	0	0.0303433	0.0671522	0.0894734	0.0473923	0.0950789	0	0.168516	0.0510471
Scaffold120:112740-113363	0	0.0303433	0.637946	0.524059	0.30805	0.237697	0.281725	0.155553	0.255236
Scaffold120:124359-124726	0.0151042	0	0	0.0127819	0.0118481	0.106964	0.281725	0.0648137	0.165903
Scaffold1201:48883-49066	0	0	0	0.0383458	0	0.0118849	0	0.129627	0
Scaffold1202:106230-106564	0.0302083	0.0303433	0.0167881	0	0.0118481	0.0594243	0.164339	0.0388882	0.204189
Scaffold1202:154529-154954	0	0	0	0	0.0355442	0.0950789	0.152601	0.116665	0.0510471
Scaffold1202:99652-99966	0	0	0.0335761	0	0	0	0	0.0518509	0.0382853
Scaffold1203:104432-104721	0	1.56268	6.44661	8.30825	8.73204	8.59276	6.6088	5.14621	7.91231
Scaffold1203:129873-130279	0.0453125	0.0303433	0.0167881	0.0894734	0.154025	0.178273	0.258248	0.181478	0.71466
Scaffold1203:132450-132806	0	0	0	0	0	0	0.0117385	0.0129627	0.0510471
Scaffold1203:35629-36018	0	0	0.402913	0.319548	0.272506	0.261467	0.446064	0.362957	0.0510471
Scaffold1203:37393-37991	0	0.045515	0.134304	0.127819	0.201417	0.190158	0.0704312	0.311106	0.114856
Scaffold1203:40837-41042	0	0	0.0167881	0.0383458	0.0118481	0	0.0117385	0.0518509	0
Scaffold120:340923-341404	0.0151042	0.0758583	0.0335761	0.0383458	0.0947846	0.118849	0.0352156	0.0648137	0.0255236
Scaffold1203:52282-52671	0	0	0	0.0127819	0	0	0.0234771	0.194441	0
Scaffold120:357688-357959	0	0	0.0167881	0	0	0.130733	0.234771	0.0518509	0.153141
Scaffold1203:70661-71067	0	0	0.0167881	0.0511277	0.0118481	0.0356546	0.0234771	0.0388882	0
Scaffold1203:71494-71943	0.151042	0.166888	0.218245	0.0127819	0.0355442	0.0475395	0.0704312	0.0129627	0.102094
Scaffold120:410303-410641	0	0	0.184669	0	0	0	0.0117385	0	0
Scaffold1204:103811-104319	0.0604166	0.045515	0.0335761	0.0255638	0.0355442	0.0950789	0.0586927	0.28518	0.0510471
Scaffold120:412705-412929	0	0	0.0671522	0	0	0	0	0	0
Scaffold120:413677-413860	0	0.0151717	0.856191	0.0383458	0	0	0	0	0
Scaffold120:424271-424328	0	0.0151717	0.0503642	0.0127819	0.165873	0.0475395	0.0469541	0.0777764	0.0510471
Scaffold1204:82039-82190	0.0151042	0	0.0503642	0.26842	0.296202	0.487279	0.716051	0.544435	0.255236
Scaffold1204:82216-82565	0	0	0.0335761	0.140601	0.0829366	0.130733	0.199555	0.207404	0.0510471
Scaffold1206:127945-128282	0	0	0.235033	0	0.0829366	0	0	0.0259255	0.0127618
Scaffold1206:70857-71155	0	0.0303433	0.134304	0.0894734	0.0236962	0.106964	0.105647	0.194441	0.267997
Scaffold1207:123765-124394	0.120833	0.106202	0.167881	0.102255	0.0592404	0.178273	0.117385	0.129627	0.0510471
Scaffold1207:134133-134525	0.0302083	0.0151717	0.0167881	0.0383458	0.0236962	0.0118849	0.0117385	0.0388882	0
Scaffold1207:135195-135361	0.0604166	0	0.0503642	0.0127819	0.0355442	0.0237697	0	0	0.0255236
Scaffold1207:147255-147470	0	0	0.0839403	0	0.0473923	0.0475395	0.0586927	0.0129627	0.0510471
Scaffold1207:161137-161334	0	0	0	0.0383458	0	0	0.0234771	0.103702	0.0382853
Scaffold1207:18515-18755	0	0.0303433	0.0167881	0.0127819	0.0236962	0.0950789	0.0939083	0.181478	0.0638089
Scaffold1207:197293-197336	0	0	0.0335761	0	0	0.0237697	0.0234771	0.0388882	0
Scaffold1207:242102-242569	0.0302083	0.0151717	0	0.0127819	0.118481	0.0594243	0.0234771	0.0777764	0.0255236
Scaffold1207:261396-261662	0	0.0151717	0.0839403	0.0383458	0.0829366	0.118849	0.0704312	0.0777764	0.0382853
Scaffold1207:272662-273391	0.166146	0.212403	0.134304	0.370676	0.426531	0.558589	0.610404	0.751839	0.791231
Scaffold1207:283173-283905	0	0.18206	0.537218	0.102255	0.319898	0.344661	0.234771	0.311106	0.14038
Scaffold1207:285258-285435	0	0.0303433	0.0671522	0	0.0236962	0.0594243	0.129124	0.0518509	0.191427
Scaffold1207:292477-292856	0	0	0	0.0127819	0.0355442	0.0713092	0.281725	0.14259	0.229712
Scaffold1207:318762-319039	0	0.0606867	0.335761	0.33233	0.154025	0.106964	0.105647	0.220366	0.0255236
Scaffold1207:34424-34822	0	0	0.0839403	0	0.0236962	0.0237697	0.0352156	0.0129627	0.153141
Scaffold1207:370520-370849	0.0151042	0.0303433	0.0167881	0.0127819	0	0	0	0.0388882	0.0510471
Scaffold1207:375117-375239	0.135937	0.121373	0.151093	0.0127819	0.0473923	0.0594243	0.0234771	0.272217	0.0765707
Scaffold1207:378719-378953	0.0302083	0.0151717	0	0.153383	0.0473923	0.0356546	0	0.233329	0.0127618
Scaffold1207:379166-379458	0	0.0151717	0.0671522	0	0.0236962	0	0.0821697	0.0777764	0.0255236
Scaffold1207:403761-404004	0	0	0.0167881	0.0127819	0.0236962	0.0594243	0.0704312	0.0388882	0.0765707
Scaffold1207:406099-406503	0	0	0	0	0.0355442	0.118849	0.0234771	0.0259255	0.0638089
Scaffold1:2078595-2078771	0	0	0.201457	0	0.0592404	0	0	0.0129627	0.0510471
Scaffold1208:127429-127762	0	0.0151717	0	0	0.0355442	0.0713092	0.0704312	0.0777764	0.0893325
Scaffold1208:152567-152824	0	0	0	0.0127819	0.0355442	0.0118849	0.0234771	0.0388882	0.0382853
Scaffold1208:45757-46183	0	0.0151717	0.352549	0	0.106633	0	0.0352156	0.0129627	0
Scaffold1208:65602-66068	0	0	0.0167881	0.153383	0.296202	0.142618	0.269986	0.362957	0.204189
Scaffold1208:7234-7486	0	0	0	0.0639096	0.0710885	0.118849	0.0586927	0.155553	0.102094
Scaffold1208:73548-74033	0	0	0.0167881	0	0.0592404	0.130733	0.129124	0.0907391	0.178665
Scaffold1208:95106-95552	0	0	0.0167881	0.0511277	0.165873	0.118849	0.0704312	0.103702	0.0893325
Scaffold1:2090215-2090254	0	0	0.0335761	0.0383458	0.0118481	0.0118849	0	0.0129627	0.0510471
Scaffold1209:31507-31832	0	0.0151717	0.587582	0.0639096	0.0710885	0.0118849	0.0117385	0.0518509	0.0510471
Scaffold1209:32730-33122	0	0.0606867	0.637946	0.0511277	0.0118481	0.0118849	0.0117385	0	0
Scaffold1209:41084-41472	0	0	0.100728	0	0	0.0118849	0.0469541	0	0
Scaffold1209:48094-48300	0	0	0.0167881	0.102255	0.142177	0.130733	0.0939083	0.168516	0.0255236
Scaffold1209:59011-59345	0	0	0	0	0.0473923	0.0594243	0.0586927	0.0388882	0.0638089
Scaffold1209:84611-84883	0	0	0.0671522	0	0.0829366	0.225812	0.199555	0.14259	0.153141
Scaffold1209:96422-96736	0	0	0.0167881	0.166165	0.0118481	0.0118849	0.0234771	0.362957	0
Scaffold12:1000547-1001009	37.1109	27.3242	17.0063	32.1593	39.62	50.166	49.877	40.366	46.2104
Scaffold1210:178017-178402	0.0302083	0.106202	0.218245	0.0127819	0	0	0.0352156	0.0129627	0.0382853
Scaffold1210:192848-193182	0	0.0151717	0.0671522	0.0127819	0.0592404	0.0475395	0.0117385	0	0.0382853
Scaffold12:1043273-1043463	0	0	0	0.345112	0.0118481	0.0118849	0.0117385	0.0518509	0.0127618
Scaffold12:1044758-1045022	0	0	0	0.0255638	0.0118481	0.0118849	0.0469541	0.0129627	0
Scaffold12:113320-113686	0	0	0.318973	0.217293	0.0947846	0.166388	0.0821697	0.829615	0.153141
Scaffold121:133228-133490	0	0	0.184669	0.0255638	0.106633	0.0356546	0.0117385	0.0129627	0
Scaffold1211:33406-33424	0	0	0.0671522	0.0255638	0.0118481	0.0237697	0.0352156	0.0648137	0.0638089
Scaffold121:140071-140413	0	0.0151717	0.100728	0.0511277	0.142177	0.0475395	0.0117385	0.0388882	0.0255236
Scaffold121:172872-173226	0	0.0151717	0.0167881	0	0.0473923	0.0237697	0.0117385	0.0648137	0.0255236
Scaffold121:174547-174975	0.0151042	0.166888	0.117516	0.255638	0.0355442	0.083194	0.0586927	0.155553	0.0765707
Scaffold121:184268-184822	0	0	0.151093	0.0639096	0.118481	0.0356546	0.0821697	0.0777764	0.0510471
Scaffold121:195521-195720	0	0	0	0	0.0118481	0.0118849	0.0234771	0.0388882	0.0255236
Scaffold12:1204347-1204730	0	0	0	0	0	0.0594243	0.0234771	0	0.0510471
Scaffold1212:148593-148682	0	0.0151717	0.0671522	0.0127819	0.0710885	0	0.0352156	0.0777764	0.0510471
Scaffold1212:190303-190632	0	0	0.0671522	0.0894734	0	0	0	0.0388882	0.0127618
Scaffold1212:203204-203445	6.60052	5.03699	0.285397	5.79021	0.817518	2.15116	3.08723	0.751839	0.510471
Scaffold121:265626-265945	0	0	0	0.115037	0.0118481	0	0	0.0907391	0.0255236
Scaffold121:299034-299270	0.3625	0.106202	0.201457	0.153383	0.0592404	0.0237697	0.140862	0.233329	0.0765707
Scaffold121:302193-302291	0	0.045515	0.0335761	0.0639096	0.0118481	0.0118849	0	0.0777764	0.0893325
Scaffold121:308492-308885	0.0151042	0.0151717	0.100728	0.115037	0.0473923	0.0118849	0	0.0129627	0.0255236
Scaffold1213:116325-116741	0	0.045515	0.0503642	0.140601	0.0473923	0.0475395	0.0469541	0.129627	0.0382853
Scaffold1213:117069-117779	1.91823	1.65371	0.369337	1.53383	1.56395	1.99666	1.8899	1.64627	1.59522
Scaffold121:311774-312178	0.679687	0.652382	0.0839403	0.230075	0.154025	0.166388	0.187817	0.544435	0.280759
Scaffold1213:120665-120914	0	0	0.0671522	0.0255638	0.0710885	0.0475395	0	0.0518509	0.0127618
Scaffold1213:121689-122232	0.0151042	0.0303433	0.117516	0.26842	0.106633	0.225812	0.199555	0.349994	0.165903
Scaffold121:312373-312575	0	0	0.167881	0.0127819	0.0473923	0.0594243	0.0117385	0.0129627	0.0255236
Scaffold1213:126393-126979	0	0.18206	0.772251	0.562404	0.177721	0.130733	0.211294	0.349994	0.165903
Scaffold121:313929-314284	0.135937	0.121373	0.0671522	0.0127819	0.0236962	0	0	0.0129627	0.0127618
Scaffold1213:152475-152671	0	0	0.134304	0.0383458	0.0710885	0	0.0469541	0.0129627	0
Scaffold1213:156920-157319	0.0151042	0.0151717	0.0671522	0.0639096	0.0710885	0.0475395	0.0586927	0.0388882	0.0893325
Scaffold121:317108-317439	0.105729	0.0303433	0.117516	0.0383458	0.0236962	0	0	0	0
Scaffold12:131798-132147	0.0151042	0	0.0335761	0.102255	0.0236962	0	0.0117385	0.0129627	0
Scaffold1213:87406-87822	0	0	0.184669	0	0.106633	0.0237697	0.0469541	0.0259255	0.0255236
Scaffold12141:285-584	0.0151042	0	0.0167881	0.0255638	0.0947846	0	0.0352156	0.0259255	0
Scaffold1215:116709-117066	0	0.0151717	0.0503642	0.881952	0.0947846	0.0950789	2.42988	0.14259	0.0255236
Scaffold121:512433-512979	0	0	0.151093	0.127819	0.0710885	0.178273	0.199555	1.20553	0.21695
Scaffold121:514024-514274	0	0	0.0335761	0.0255638	0.0473923	0.0950789	0.0704312	0.155553	0.0638089
Scaffold121:515342-515704	0	0	0.0335761	0.0383458	0.0236962	0.0237697	0.0469541	0.181478	0.0127618
Scaffold121:515803-516261	0	0	0	0.0383458	0	0	0.0117385	0.311106	0.0765707
Scaffold121:525886-526064	0	0	0.0167881	0.0127819	0.0473923	0.0594243	0.105647	0.14259	0.255236
Scaffold12:153720-154036	0.0755208	0	0.0167881	0	0	0	0.0469541	0.0648137	0.0127618
Scaffold121:542163-542447	0	0	0	0.0127819	0	0.0118849	0.0117385	0.298143	0.0510471
Scaffold121:551863-552011	0	0	0	0.0127819	0	0.0118849	0.0821697	0.0648137	0.0765707
Scaffold121:568696-569012	0	0.045515	0.0167881	0	0.0236962	0.0118849	0.0704312	0.14259	0.306283
Scaffold1216:151118-151561	0.0151042	0	0.352549	0.0383458	0.0592404	0.0118849	0.0117385	0.103702	0.0893325
Scaffold1216:159914-160181	0	0	0.167881	0	0.0592404	0.0475395	0.0469541	0	0.0127618
Scaffold1216:195827-196101	0	0	0.0167881	0.357894	0.0118481	0	0	0.311106	0
Scaffold1216:197136-197512	0.0453125	0.106202	0.201457	0.26842	0.118481	0.178273	0.129124	0.207404	0.0255236
Scaffold1216:211062-211074	0	0.0303433	0.201457	0.102255	0.0355442	0.0237697	0.0352156	0.0907391	0.0127618
Scaffold1216:213250-213561	0.0151042	0.0151717	0.0335761	0.127819	0	0.0118849	0.0117385	0.0388882	0
Scaffold1216:254671-254728	0.0302083	0	0.100728	0.0766915	0.0236962	0.0475395	0.0234771	0.0259255	0
Scaffold1216:263627-263960	0	0	0.235033	0.0127819	0.118481	0.0713092	0.0586927	0	0.0638089
Scaffold1216:264294-264393	0	0	0.0335761	0.0639096	0.225114	0.0475395	0.152601	0	0
Scaffold1216:38192-38467	0	0	0.218245	0.0255638	0	0	0.0117385	0	0.0255236
Scaffold1217:128695-129086	0.0453125	0.0303433	0	0.0255638	0.0236962	0.0118849	0.0117385	0.0388882	0
Scaffold1217:86040-86306	0	0	0	0	0	0.0475395	0	0.0777764	0
Scaffold1218:245344-245943	0	0	0.0167881	0	0.0710885	0.190158	0.129124	0.0907391	0.14038
Scaffold1218:259633-259992	0.0302083	0.0303433	0.0671522	0	0	0.0118849	0.0352156	0	0.0255236
Scaffold12:184852-185185	0	0.045515	0.654734	0	0.189569	0.0237697	0.105647	0.0907391	0.0510471
Scaffold12:188122-188503	0	0	0.335761	0	0.0710885	0.0237697	0	0.0129627	0.0255236
Scaffold1219:119191-119953	0.0604166	0.0606867	0.470066	0.0127819	0.225114	0.154503	0.223032	0.0777764	0.331806
Scaffold1219:125280-125441	0	0.0303433	0.0335761	0.0639096	0	0.0237697	0.0352156	0.155553	0.0255236
Scaffold1219:129768-129854	0	0	0.0503642	0.127819	0.0473923	0.0475395	0.0234771	0.0388882	0.0127618
Scaffold1219:154288-154681	0	0	0.0839403	0	0.0118481	0.0237697	0	0.0259255	0.0127618
Scaffold1219:1588-1960	0.105729	0.0606867	0.0335761	0.0127819	0.0118481	0.0475395	0.0469541	0.0129627	0.0510471
Scaffold1220:194782-194955	0	0	0.0335761	0.0511277	0.0236962	0.0237697	0	0.0777764	0
Scaffold1220:198474-198771	0	0	0	0	0	0	0.0586927	0.0129627	0
Scaffold122:1004045-1004527	0	0.0606867	0.335761	0.0766915	0.0355442	0.0237697	0.0234771	0.0648137	0
Scaffold122:1018228-1018614	0	0.0606867	0.0671522	0	0.0236962	0.0356546	0	0.0388882	0.0127618
Scaffold122:1020188-1020863	0	0.227575	1.27589	0.255638	0.568708	0.46351	0.493018	0.868503	0.49771
Scaffold122:1022322-1022832	0	0.136545	0.386125	0.0511277	0.0947846	0.0475395	0.0469541	0.0907391	0.0510471
Scaffold122:1058802-1059084	0	0	0	0.178947	0.0118481	0	0	0.311106	0
Scaffold1221:104551-104867	0	0	0.0167881	0.0511277	0	0.0118849	0	0.0388882	0.0255236
Scaffold122:1137495-1138126	0	0	0.201457	0.191729	0.0473923	0.106964	0.0586927	0.28518	0.0510471
Scaffold122:1141878-1142304	0	0	0.369337	0.0894734	0.0829366	0.0713092	0.199555	0.103702	0.165903
Scaffold122:114344-114636	0	0.0758583	0.721886	0.0766915	0.130329	0.0356546	0.0117385	0.0388882	0.0127618
Scaffold122:1158161-1158461	0	0	0.0167881	0.0127819	0	0.0356546	0	0.0388882	0.0255236
Scaffold122:1172848-1173293	0	0	0.251821	0	0.0236962	0.0356546	0.0352156	0.0259255	0.0382853
Scaffold1221:176346-176721	0	0	0	0.0383458	0	0.0118849	0	0.0388882	0
Scaffold122:1179523-1179876	0	0.0151717	0.184669	0.115037	0.201417	0.178273	0.117385	0.14259	0.0638089
Scaffold1221:180383-180503	0	0	0	0.0127819	0.0947846	0.0475395	0.129124	0.0388882	0.0638089
Scaffold122:1180399-1180792	0	0	0.0839403	0.0127819	0.0355442	0.0118849	0.0352156	0.0518509	0.0765707
Scaffold122:1186706-1187307	0	0	0.0503642	0.0894734	0.24881	0.154503	0.187817	0.129627	0.0765707
Scaffold1221:190874-191179	0.105729	0.045515	0	0	0	0.0118849	0.0117385	0.0388882	0.0382853
Scaffold1221:191381-191588	0	0	0	0.0127819	0.0236962	0.0118849	0.0234771	0.0129627	0.0638089
Scaffold1221:198340-198438	0	0.0606867	0	0.102255	0.0118481	0.106964	0.0469541	0.0129627	0.0382853
Scaffold1221:201240-201617	0	0.0303433	0	0.0255638	0.0947846	0.178273	0.105647	0.116665	0.0765707
Scaffold1221:204317-204493	0	0	0	0.0766915	0.0710885	0.0475395	0	0.0129627	0.0510471
Scaffold1221:208682-208984	0	0	0	0	0	0	0.0234771	0.0518509	0
Scaffold1221:222802-223238	0.0151042	0.0606867	0	0	0.0118481	0.0356546	0.105647	0.0388882	0.102094
Scaffold1221:22993-23252	0	0	0	0.0255638	0.0236962	0	0.0352156	0	0.0382853
Scaffold1221:242111-242421	0	0	0	0	0	0.0475395	0.0704312	0.0518509	0.0127618
Scaffold1221:252670-253062	0	0	0	0.0383458	0	0	0	0.155553	0.0127618
Scaffold1221:254149-254503	0	0	0.117516	0.204511	0.0592404	0.142618	0.105647	0.362957	0.267997
Scaffold1221:271723-271851	0	0	0	0.0255638	0	0	0.0234771	0	0.0638089
Scaffold122:128775-128900	0	0	0.134304	0.0639096	0.0947846	0.0118849	0	0.0259255	0
Scaffold122:130715-131327	0	0.27309	1.8299	0.485713	0.758277	0.332776	0.340418	0.259255	0.0638089
Scaffold122:134206-134481	0	0.0151717	0.218245	0.0255638	0.0473923	0.0118849	0.0117385	0	0
Scaffold122:141295-141761	0	0.121373	0.117516	0.0255638	0.0947846	0.0594243	0.0352156	0.0777764	0.0382853
Scaffold122:146545-147114	0	0.394463	0.537218	0.230075	0.201417	0.166388	0.140862	0.116665	0.0510471
Scaffold122:148901-149398	0	0.0606867	0.151093	0.0639096	0.0236962	0.106964	0.0352156	0.0259255	0.0255236
Scaffold122:156336-156716	0	0.0151717	0.251821	0.0511277	0.106633	0.0713092	0.0939083	0.0518509	0.0893325
Scaffold122:156908-157652	0	0.0303433	0.235033	0.0255638	0.118481	0.130733	0.0117385	0.0388882	0.114856
Scaffold1221:69700-69828	0	0	0.0167881	0.0383458	0.0473923	0.0237697	0.0586927	0.0648137	0.0765707
Scaffold1221:74586-75003	0	0	0.318973	0.33233	0.106633	0.0237697	0.0352156	0.155553	0.0510471
Scaffold122:175954-176194	0	0	0.218245	0.0255638	0.0592404	0	0	0.0388882	0
Scaffold122:183318-183623	0	0	0.0671522	0	0	0	0.0234771	0.0129627	0.0255236
Scaffold12:222067-222457	0	0.045515	0.0167881	0.0511277	0.0118481	0.0475395	0.0117385	0	0.0638089
Scaffold122:224181-224721	0	0.09103	0.184669	0.0511277	0.106633	0.261467	0.152601	0.129627	0.102094
Scaffold122:226904-227514	0	0.0758583	0.184669	0.0511277	0.0947846	0.0356546	0.0352156	0.0648137	0.0510471
Scaffold122:229289-229779	0	0	0.0335761	0.0639096	0.0473923	0.118849	0.117385	0.0518509	0.0510471
Scaffold122:229849-230258	0	0.0606867	0.0167881	0.127819	0.177721	0.3922	0.493018	0.505547	0.319045
Scaffold1222:68000-68274	0	0.0151717	0	0.0127819	0.0236962	0	0.0234771	0.401845	0.0893325
Scaffold1223:133175-133274	0	0	0.167881	0	0	0	0	0	0
Scaffold1223:144130-144883	0.0151042	0.0606867	13.5815	0.396239	0.450227	0.106964	0.176078	0.233329	0.114856
Scaffold1223:147699-147882	0	0.0303433	0.184669	0	0	0	0	0.0129627	0
Scaffold1223:153410-153606	0	0	0.302185	0	0.0236962	0	0	0	0
Scaffold1223:158712-158904	0	0.0303433	0.0335761	0.0255638	0.0355442	0.0594243	0.117385	0.0388882	0.0893325
Scaffold1223:162466-162584	0	0	0	0.0383458	0.0236962	0.083194	0.0586927	0.103702	0.102094
Scaffold1223:168967-169174	0	0	0	0	0	0	0	0.194441	0.0127618
Scaffold122:324058-324414	0.0755208	0	0.0167881	0.0766915	0.0355442	0.0237697	0	0.0259255	0.0127618
Scaffold122:329138-329586	0	0.0303433	0.705098	0.0127819	0.118481	0	0.0234771	0	0.0127618
Scaffold1223:63415-63691	0	0	0	0	0.0829366	0.0594243	0.105647	0.129627	0.0638089
Scaffold1224:136464-136571	0	0	0.0503642	0	0	0	0	0.0259255	0
Scaffold1224:162061-162341	0	0	0	0.0383458	0.0592404	0.0237697	0.0469541	0.103702	0.0127618
Scaffold1224:179331-179697	0	0	0.0503642	0.0766915	0.0236962	0.0356546	0.0469541	0.103702	0
Scaffold1224:185626-185842	0	0	0.0167881	0.0639096	0.0473923	0.0475395	0	0.0388882	0.0127618
Scaffold1224:194282-194689	0.513541	0.561352	0.721886	0.0894734	0.225114	0.118849	0.0469541	0.129627	0.0510471
Scaffold1224:234948-235505	2.22031	1.8206	0.805827	0.434585	0.225114	0.083194	0.117385	0.259255	0.0765707
Scaffold122:425743-426093	0	0	0	0.140601	0	0.0118849	0.0234771	0.103702	0.0510471
Scaffold1224:371277-371503	0	0	0.134304	0.0383458	0.0710885	0.0118849	0.0352156	0.0388882	0.0255236
Scaffold1224:379555-379794	0.135937	0.0758583	0.0503642	0.0511277	0.130329	0.106964	0.0821697	0.0388882	0.114856
Scaffold1224:43506-43681	0	0	0	0	0	0.0713092	0.0234771	0.0259255	0.0638089
Scaffold1224:49949-50343	0.0453125	0.0303433	0.0335761	0.0127819	0.0118481	0	0.0352156	0.0518509	0
Scaffold1224:55219-55410	0	0	0	0.140601	0.0118481	0	0.0352156	0.168516	0
Scaffold1224:76540-76639	0	0	0.0167881	0.0255638	0.0355442	0.0713092	0.0704312	0.14259	0.267997
Scaffold122:504317-504762	0.0302083	0.0151717	0.134304	0.0383458	0.0829366	0.0356546	0.0469541	0.0518509	0.0638089
Scaffold122:510344-510808	0.0302083	0.0151717	0	0.0255638	0.165873	0.130733	0.105647	0.0648137	0.0255236
Scaffold122:515871-516343	0.0151042	0.0151717	0	0	0.106633	0.118849	0.187817	0.0648137	0.0510471
Scaffold122:54321-54332	0	0	0.0335761	0.0255638	0	0	0	0.0259255	0.0382853
Scaffold122:556305-556509	0.0151042	0	0.117516	0	0	0	0.0469541	0	0.0638089
Scaffold122:58132-58579	0.468229	0.379292	1.22553	0.690224	0.106633	0.083194	0.129124	0.155553	0.178665
Scaffold1226:100760-101148	0	0	0	0	0.0710885	0.106964	0.0939083	0.129627	0.0127618
Scaffold1226:131179-131345	0	0	0	0	0.0473923	0.0475395	0.0117385	0.0648137	0
Scaffold122:616255-616542	0	0.0303433	0.0839403	0.0383458	0	0	0.0117385	0.0259255	0
Scaffold1226:174996-175127	0	0	0.100728	0	0.0236962	0	0	0	0
Scaffold1226:178508-178871	0	0	0	0.0255638	0	0.0950789	0.0234771	0.0518509	0.0638089
Scaffold1226:223905-224195	0	0	0.117516	0	0.0473923	0.0118849	0	0.0129627	0.0127618
Scaffold122:660929-661009	0	0	0.0839403	0	0.0355442	0	0	0.0259255	0
Scaffold122:671800-672094	0	0	0.0167881	0.0383458	0.0236962	0.0118849	0.0117385	0	0.0255236
Scaffold1227:101235-101575	0.0151042	0	0	0.0255638	0.106633	0.0475395	0.0352156	0.0648137	0.0127618
Scaffold122:72592-72921	0	0	0	0	0.0236962	0.0118849	0.0117385	0.0388882	0
Scaffold12:27435-27580	0	0.045515	0.218245	0	0	0	0	0	0
Scaffold122:786585-786977	0	0	0	0.0127819	0.0355442	0.0356546	0	0.0259255	0.0127618
Scaffold12:28286-28663	0	0.0151717	0.117516	0.0127819	0.0118481	0.0118849	0.0352156	0	0
Scaffold1228:29912-30267	0	0	0	0.0383458	0.142177	0.202043	0.176078	0.155553	0.21695
Scaffold1228:33596-33958	0	0	0	0.0255638	0	0.0118849	0.0117385	0.0907391	0.0510471
Scaffold122:835826-836198	0.0755208	0.121373	0.0335761	0.0255638	0	0	0.0117385	0.0129627	0.0382853
Scaffold1228:54155-54401	0	0	0.554006	0	0.154025	0.0356546	0.0469541	0.0129627	0
Scaffold122:881465-881733	0	0	0.184669	0	0.0829366	0.0118849	0.0117385	0.0129627	0.0255236
Scaffold12:29140-29443	0	0	0.251821	0.127819	0.0118481	0	0.0117385	0.0129627	0
Scaffold122:972791-973235	0.0151042	0.0151717	0.0503642	0	0.0355442	0.0594243	0.0586927	0.116665	0.242474
Scaffold12:29788-30056	0	0.0303433	0.218245	0	0.0118481	0.0237697	0	0	0
Scaffold122:978934-979304	0.0302083	0	0.268609	0.0383458	0.0710885	0.0237697	0.0352156	0.0388882	0.0255236
Scaffold12:298745-298895	0	0	0.134304	0	0	0.0356546	0	0.0129627	0
Scaffold122:988924-989191	0	0.136545	0.218245	0.0766915	0.154025	0.0950789	0.199555	0.155553	0.127618
Scaffold122:989412-989684	0	0.045515	0.0167881	0	0.0118481	0	0.0117385	0.116665	0.0127618
Scaffold122:990686-990691	0	0.0151717	0.0671522	0	0	0.0118849	0.0821697	0.0518509	0.0127618
Scaffold122:991384-991566	0	0	0.0839403	0.0255638	0.0947846	0.106964	0.199555	0.311106	0.153141
Scaffold122:994246-994502	0	0	0.0167881	0.0639096	0.0473923	0	0	0.0259255	0
Scaffold1230:177547-177718	0	0	0.117516	0.0127819	0.0118481	0	0.0234771	0.0259255	0.0382853
Scaffold1230:184913-185269	0	0	0.0335761	0	0.0592404	0.0118849	0.0117385	0.0518509	0.0255236
Scaffold1230:58129-58512	0	0	0	0.0127819	0.0118481	0.0237697	0.0234771	0.0259255	0.0638089
Scaffold1230:5855-6212	0	0	0	0.0383458	0.118481	0.130733	0.0352156	0.116665	0
Scaffold1230:60045-60376	0	0.0606867	0.705098	0.472931	0.177721	0.0950789	0.234771	0.259255	0.14038
Scaffold1230:66638-67173	0	0	0	0.357894	0.0355442	0.0594243	0.0352156	0.194441	0.0382853
Scaffold1230:94254-94651	0	0.106202	0.0671522	0.0383458	0.0118481	0	0.0117385	0.103702	0
Scaffold123:1096948-1097437	0	0	0.251821	0	0.0355442	0.0118849	0	0	0
Scaffold123:1108705-1109068	0	0	0.184669	0.741351	0.24881	0.237697	0.199555	0.777764	0.14038
Scaffold12:31168-31801	0.0151042	0.0606867	0.570794	0.230075	0.0592404	0.0237697	0.0234771	0.103702	0.0510471
Scaffold1231:171068-171365	0	0	0.100728	0	0	0.0118849	0	0	0.0127618
Scaffold1231:27632-27761	0	0	0.0167881	0.0127819	0.0947846	0.118849	0.0821697	0.0388882	0.0638089
Scaffold123:172311-172550	0	0	0.134304	0	0	0	0	0.0259255	0
Scaffold123:182835-183070	0.0151042	0	0.0167881	0.0127819	0.0118481	0.0237697	0.0586927	0.0518509	0.0893325
Scaffold123:197781-198137	0	0	0.134304	0	0.0355442	0.0118849	0	0	0
Scaffold1232:232819-233205	0	0.0151717	0.151093	0.0894734	0.130329	0.106964	0.140862	0.246292	0.153141
Scaffold1232:258573-258967	0	0	0	0.0255638	0	0.0237697	0.0821697	0.0388882	0.0510471
Scaffold1232:39020-39238	0.347396	0.27309	0.0839403	0.166165	0.0710885	0.178273	0.129124	0.259255	0.0638089
Scaffold1232:83818-84243	0	0	0.0671522	0.102255	0.0236962	0.0713092	0.0352156	0.0518509	0.0127618
Scaffold1233:147206-147440	0	0.0303433	0.184669	0	0.0592404	0.0356546	0.0117385	0.0129627	0.0127618
Scaffold1233:147824-148172	0	0	0.0671522	0	0	0	0	0.0129627	0
Scaffold123:321206-321471	0	0	0	0.0511277	0.118481	0.225812	0.176078	0.116665	0.114856
Scaffold123:333619-333811	0	0	0.0167881	0	0.0118481	0.0118849	0.0704312	0.0129627	0
Scaffold123:34142-34285	0	0	0.151093	0	0	0.0118849	0	0	0.0127618
Scaffold1233:45352-45689	0	0.151717	0.151093	0.0383458	0.0710885	0.0356546	0.0234771	0.0907391	0.0127618
Scaffold1233:51585-51913	0	0.0303433	0	0	0.0473923	0.0118849	0.0939083	0.0388882	0.0510471
Scaffold123:355624-355842	0.0151042	0.045515	0	0	0	0.0118849	0.0469541	0.0518509	0.0127618
Scaffold1233:55775-55949	0	0	0	0.0127819	0.0118481	0.0237697	0	0.0129627	0.0382853
Scaffold1233:57413-57497	0.0151042	0	0	0.0255638	0.0710885	0.0475395	0.105647	0.0518509	0.0382853
Scaffold123:38000-38389	0	0	0.0167881	0.0255638	0.0355442	0.0237697	0.0939083	0.0129627	0.0638089
Scaffold123:387605-388008	0	0.0151717	0.369337	0.0255638	0.189569	0.106964	0.0821697	0.0259255	0.153141
Scaffold1234:32549-32985	0	0.0606867	0.352549	0.140601	0.0829366	0.0237697	0.0234771	0.0129627	0
Scaffold1234:36232-36504	0	0.106202	0.0167881	0	0.0118481	0	0	0.181478	0.0127618
Scaffold1234:37816-38033	0	0	0.0167881	0.0255638	0.0118481	0.0118849	0	0.0648137	0
Scaffold1234:42851-43141	0	0.121373	0.134304	0.0894734	0.0355442	0.130733	0.0117385	0.272217	0
Scaffold1234:65236-65448	0	0.0151717	0.218245	0.293984	0.0829366	0.083194	0.0234771	0.272217	0.0893325
Scaffold123:49393-49637	0	0	0.0167881	0.0127819	0.106633	0.0475395	0.117385	0.0259255	0.0893325
Scaffold123:51679-52032	0	0	0	0	0.0355442	0.0237697	0.0586927	0.0129627	0.0127618
Scaffold123:534799-535173	0.0302083	0.0151717	0.302185	0	0.0355442	0.0118849	0.0469541	0.0259255	0.791231
Scaffold1235:65828-65960	0	0.0303433	0.0503642	0	0.0355442	0.0118849	0.0234771	0.0129627	0
Scaffold1235:73070-73488	0	0	0.335761	0.178947	0.30805	0.166388	0.199555	0.362957	0.229712
Scaffold1235:74259-74447	0	0.0151717	0.100728	0.255638	0.106633	0.213928	0.0469541	0.194441	0.0638089
Scaffold1235:88209-88407	0	0	0	0	0	0.0356546	0.0821697	0.0648137	0.0893325
Scaffold123:642148-642396	0	0	0.0839403	0.0639096	0.0236962	0.0237697	0.0352156	0.0388882	0.0255236
Scaffold1236:74207-74603	0.0302083	0	0.151093	0.127819	0.154025	0.154503	0.117385	0.155553	0.114856
Scaffold1237:44875-45140	0.0302083	0.0758583	0.117516	0	0.0473923	0.0713092	0.0234771	0.0259255	0.0510471
Scaffold123:809003-809119	0	0	0.0671522	0.0127819	0.154025	0.118849	0.0586927	0.0259255	0.0255236
Scaffold123:811291-811488	0	0	0.218245	0	0.0355442	0.0356546	0.0469541	0.0388882	0.0382853
Scaffold1238:129979-130278	0.0151042	0.0151717	0.0671522	0	0	0.0237697	0.0469541	0.0129627	0.0255236
Scaffold123:813339-813560	0	0	0.100728	0.0127819	0.0236962	0.0356546	0.0469541	0.0388882	0
Scaffold1238:134540-134900	0	0.045515	0.856191	1.26541	0.130329	0.0475395	0.0469541	1.08887	0.0255236
Scaffold123:814961-815183	0	0.0151717	0.134304	0	0.0473923	0.0237697	0	0	0.0255236
Scaffold123:815668-815965	0	0	0.0335761	0.0127819	0.142177	0.0713092	0.0469541	0	0.0255236
Scaffold123:826852-827093	0	0.0151717	0.100728	0	0.0355442	0.0237697	0.0704312	0.0907391	0.0127618
Scaffold123:827560-827875	0	0	0.167881	0	0.0473923	0.0356546	0.0352156	0.0388882	0
Scaffold1238:284133-284534	0.347396	0.333777	0.100728	0.0255638	0.0592404	0.0118849	0	0.0129627	0.0127618
Scaffold123:850289-850689	0	0.0151717	0.218245	0.217293	0.355442	0.249582	0.152601	0.207404	0.153141
Scaffold12:385262-385902	0	0.303433	1.05765	0.33233	0.0473923	0.0475395	0.0117385	0.116665	0.0255236
Scaffold123:876094-876568	0.241667	0.106202	0.117516	0.127819	0.118481	0.142618	0.117385	0.129627	0.0893325
Scaffold12:387829-388154	0	0	0.134304	0.102255	0.0473923	0	0.0469541	0	0
Scaffold123:879768-880154	0	0	0.218245	0.0255638	0	0.0237697	0.0117385	0	0
Scaffold1238:89886-89932	0	0	0.0671522	0	0.0236962	0.0475395	0.0234771	0.0518509	0.0255236
Scaffold1239:114299-114693	0	0.121373	0.0839403	0.0127819	0.0355442	0	0.0234771	0.155553	0
Scaffold1239:121425-121761	0	0	0.100728	0	0.0592404	0.0118849	0.0352156	0.0259255	0.0127618
Scaffold123:933436-934543	0	0	0.0671522	0.370676	0.0829366	0.0237697	0.0704312	0.246292	0.0382853
Scaffold123:935651-935940	0	0	0.0503642	0	0.0829366	0.083194	0.0352156	0.0129627	0.0510471
Scaffold1239:42341-42493	0	0	0.117516	0	0	0.0356546	0	0	0
Scaffold1239:60947-61404	0	0	0	0.127819	0.0473923	0.142618	0.140862	0.103702	0.0893325
Scaffold1239:64429-64747	0	0	0.0335761	0.140601	0.177721	0.190158	0.0704312	0.14259	0.0765707
Scaffold1239:99283-99337	0.0151042	0.0606867	0.251821	0.0127819	0.142177	0.106964	0.129124	0.103702	0.0510471
Scaffold12:409572-409912	0	0	0	0	0	0.0713092	0.117385	0.0388882	0.165903
Scaffold124:109708-109858	0	0	0.0335761	0.0127819	0	0.0356546	0	0	0
Scaffold124:132873-133340	0	0	0	0.115037	0.0947846	0.130733	0.0586927	0.0648137	0.0382853
Scaffold12:413410-414137	0	0	0.0671522	0.0894734	0.0236962	0.0594243	0.269986	0.492584	0.433901
Scaffold1241:69477-69926	0	0	0.268609	0.230075	0.236962	0.344661	0.305202	0.648137	0.331806
Scaffold1241:73365-73838	0.241667	0.09103	0.302185	0.26842	0.260658	0.249582	0.375633	0.505547	0.370092
Scaffold1241:74823-75178	0	0	0.0167881	0	0.0236962	0	0.0234771	0.0388882	0.0255236
Scaffold124:183289-184044	0	0	0.0335761	0	0.0118481	0	0.0939083	0.0648137	0.344568
Scaffold124:184633-185028	0	0	0	0.0127819	0	0	0.0352156	0.0388882	0.153141
Scaffold1242:62177-62325	0	0	0.0671522	0.0639096	0.165873	0.0950789	0.0117385	0.0388882	0.0382853
Scaffold124:262210-262607	0	0.045515	0	0	0	0	0	0.0518509	0
Scaffold1242:70644-70906	0	0	0	0	0.0236962	0.0713092	0.0234771	0.168516	0.102094
Scaffold1244:44995-45586	0	0.0151717	0.318973	0	0.770125	0.43974	0.434326	0.207404	0.0638089
Scaffold1245:19502-19769	0	0.0151717	0.167881	0.0766915	0.0473923	0.0356546	0.0586927	0.0648137	0
Scaffold1245:24046-24210	0	0	0.0167881	0	0	0.0118849	0.0469541	0	0
Scaffold1245:32018-32411	0	0	0.0839403	0.0127819	0.0236962	0	0.0117385	0.0259255	0.0127618
Scaffold124:598227-598535	0	0.045515	0	0	0.0236962	0.0118849	0.0469541	0.0129627	0.0382853
Scaffold1246:150899-151535	0	0	0	0.0639096	0.118481	0.0475395	0.164339	0.181478	0.204189
Scaffold1246:167265-167654	0.0151042	0.0151717	0.0671522	0.178947	0	0.0237697	0	0.0648137	0.0127618
Scaffold1246:174355-174722	0.0453125	0.09103	0.218245	0.86917	0.189569	0.285237	0.234771	0.505547	0.255236
Scaffold1246:198912-199561	0	0	1.20874	0.0127819	0.0473923	0.0475395	0.0117385	0.0259255	0.0382853
Scaffold1246:220095-220355	0.105729	0.197232	0.100728	0.115037	0.0710885	0.0594243	0.0586927	0.0777764	0.0127618
Scaffold1246:24197-24394	0	0.0303433	0.0335761	0	0.0236962	0.0237697	0.0469541	0	0
Scaffold12:463423-463655	0.120833	0	0	0.0639096	0.0355442	0.0118849	0.0117385	0.0259255	0.0510471
Scaffold1246:6125-6347	0.0302083	0.0151717	0.0503642	0.0255638	0.118481	0.0237697	0.0234771	0.103702	0.0382853
Scaffold1247:159341-159739	0	0	0.0335761	0.0511277	0	0	0	0.0777764	0
Scaffold124:750294-750514	0	0	0	0.0383458	0	0	0	0.0648137	0.0255236
Scaffold1248:100782-101140	0	0.0151717	0.167881	0.0255638	0.0473923	0.083194	0.0234771	0.103702	0.0510471
Scaffold1248:101657-101999	0	0	0	0.166165	0	0	0.0117385	0.0907391	0.0255236
Scaffold1248:41698-41882	0	0	0.0839403	0.153383	0.201417	0.083194	0.105647	0.0907391	0.14038
Scaffold1248:63446-63776	0	0	0	0.0127819	0.0118481	0	0	0.116665	0.0127618
Scaffold1248:84694-85046	0.0453125	0.0303433	0.151093	0.0127819	0.130329	0.0356546	0.0586927	0.0388882	0.0255236
Scaffold1249:70915-71184	0	0	0	0	0.0118481	0.0118849	0.0586927	0	0
Scaffold1249:73659-73777	0.211458	0.09103	0.0839403	0.115037	0.189569	0.213928	0.152601	0.194441	0.153141
Scaffold1249:99696-100113	0	0	0.0167881	0.485713	1.24405	1.58069	1.47906	1.34812	2.05465
Scaffold1250:184890-185265	0	0	0.0671522	0.0639096	0.0236962	0.0237697	0.0704312	0.155553	0.0638089
Scaffold1250:185566-185925	0	0	0	0	0.0118481	0.0356546	0.0234771	0.0259255	0.102094
Scaffold1250:197201-197217	0	0	0	0.0127819	0	0	0.0234771	0.129627	0
Scaffold1250:297701-297970	0	0	0	0	0	0	0	0.0129627	0.0510471
Scaffold1250:54809-55007	0	0.0606867	0.0839403	0	0	0.0118849	0.0117385	0	0.0127618
Scaffold125:143078-143333	0	0	0.0503642	0.0127819	0.0592404	0.0118849	0.0352156	0.0648137	0
Scaffold125:157738-158133	0	0	0.0671522	0	0	0.0118849	0	0	0
Scaffold125:192154-192273	0.0151042	0.0151717	0.335761	0.115037	0.0829366	0.178273	0.234771	0.220366	0.114856
Scaffold125:21547-21726	0.0302083	0.0303433	0.0671522	0.0639096	0.0236962	0	0.0117385	0.0259255	0.0510471
Scaffold1252:166234-166554	77.2729	60.0191	41.2147	63.5389	76.8467	87.5914	81.9702	83.843	69.6793
Scaffold125:237607-237868	0	0	0.0503642	0.0127819	0.0118481	0.0594243	0.0704312	0.0648137	0.0638089
Scaffold125:239109-239421	0	0	0.0335761	0	0.0473923	0.0356546	0.0821697	0.0259255	0.0893325
Scaffold125:239696-239809	0	0	0	0.0127819	0.118481	0.0594243	0.0469541	0.0388882	0.0382853
Scaffold125:240141-240323	0	0	0	0	0.0236962	0.0356546	0.0117385	0.0259255	0.0382853
Scaffold1252:58362-58476	0	0	0	0.0127819	0.0473923	0.0118849	0.0469541	0.0907391	0.0893325
Scaffold1252:71704-71856	0	0	0	0	0.0118481	0	0	0.0259255	0.0510471
Scaffold125:302426-302740	0	0	0.0671522	0	0	0.0356546	0.0234771	0.0129627	0.0765707
Scaffold1253:11021-11187	0	0	0.0839403	0.0255638	0.130329	0	0.0117385	0	0.0127618
Scaffold1253:116387-116705	0	0	0.0671522	0	0	0	0.0234771	0	0
Scaffold1253:166584-166788	0	0	0.134304	0.0127819	0.0236962	0.0118849	0	0.0129627	0
Scaffold1253:228071-228833	0.105729	0.0758583	0.453278	0	0.0947846	0.0118849	0.0234771	0	0
Scaffold125:347646-347894	0	0	0.117516	0.0255638	0	0	0	0	0
Scaffold1253:68047-68444	0	0	0	0	0.0118481	0.0356546	0.0821697	0.129627	0.102094
Scaffold125:390685-390987	0.0151042	0.0151717	0	0.0383458	0.0355442	0.0356546	0.0234771	0.0648137	0.0382853
Scaffold1254:112223-112624	0	0	0	0.0255638	0.0236962	0.0475395	0.0117385	0.0388882	0.0765707
Scaffold1254:125685-126064	0	0	0	0	0	0	0	0.0648137	0.0127618
Scaffold1254:136127-136237	0.0604166	0.045515	0.0335761	0.0255638	0.0118481	0.0475395	0.0586927	0.0518509	0
Scaffold125:413853-414041	0	0	0	0	0	0.0475395	0.0117385	0	0
Scaffold1254:15250-15796	0.0604166	0.0606867	0.453278	0.0127819	0.177721	0.0594243	0.0352156	0	0.102094
Scaffold125:438055-438821	2.43177	1.77509	0.251821	0.677442	1.16111	0.760631	0.903867	0.596286	2.25884
Scaffold1254:84922-85310	0.0302083	0.0303433	0.0839403	0.0383458	0.0592404	0.0237697	0.0469541	0.0129627	0.0382853
Scaffold125:499822-500194	0	0	0	0	0	0.0356546	0.0352156	0.0648137	0.0127618
Scaffold1256:103208-103731	0	0.0151717	0.151093	0.0511277	0.0118481	0.0118849	0	0	0.0255236
Scaffold1256:215071-215197	0	0	0.0335761	0	0.0710885	0.0237697	0	0	0
Scaffold1256:245510-245751	0	0.0151717	0.453278	0.0255638	0.0947846	0.0118849	0.0234771	0	0.0255236
Scaffold1256:319039-319371	0	0	0.0167881	0	0	0	0	0	0.0638089
Scaffold1256:379735-380115	0	0	0.0503642	0.0127819	0.0118481	0.0237697	0.0117385	0.0518509	0.0255236
Scaffold1256:52331-52671	0.498437	0.379292	0.318973	0.0255638	0.0473923	0.083194	0.105647	0.0388882	0.114856
Scaffold1256:81478-81564	0	0	0.0503642	0.0255638	0.0592404	0.0356546	0	0	0.0127618
Scaffold1257:128231-128491	0	0	0	0.0511277	0.118481	0.0475395	0.0939083	0.0777764	0.0127618
Scaffold125:731092-731376	0.0151042	0.045515	0	0.0127819	0.0592404	0.083194	0.0821697	0.0388882	0.14038
Scaffold1257:33141-33196	0	0	0	0	0.0355442	0.0237697	0.0469541	0	0.0255236
Scaffold1257:71756-72040	0	0	0	0.0255638	0	0	0.0117385	0.0388882	0
Scaffold1259:120422-120635	0	0	0	0.0127819	0.0118481	0.0118849	0.0352156	0.0648137	0
Scaffold12:59876-59927	0	0	0.0167881	0.0127819	0.0473923	0.0237697	0	0	0.0255236
Scaffold1260:165577-165755	0	0	0.419701	0	0	0	0	0	0
Scaffold1260:58393-58763	0.211458	0.136545	0.218245	0.0511277	0.0592404	0.0356546	0.164339	0.155553	0.21695
Scaffold12608:915-1274	0	0	0	0	0	0	0.0586927	0.0259255	0.102094
Scaffold12608:93-380	0	0	0	0	0.0236962	0.0118849	0.0939083	0.0518509	0.102094
Scaffold1261:11574-11976	0.0302083	0.0151717	0	0.153383	0.130329	0	0.117385	0.272217	0
Scaffold1261:13776-14154	0	0	0	0.0255638	0.0355442	0.0237697	0.0234771	0.790727	0.0510471
Scaffold1261:23292-23400	0	0	0.0335761	0.0383458	0.0592404	0.0237697	0.0586927	0	0.0255236
Scaffold12612:573-929	0	0.0758583	0.235033	0	0	0	0	0.0259255	0
Scaffold1261:27891-28276	0	0	0	0.0383458	0.0829366	0.0594243	0	0.0129627	0.0127618
Scaffold1261:32796-33049	0	0	0.0167881	0.0127819	0.0236962	0	0.0117385	0.0518509	0.0510471
Scaffold1262:100665-100879	0	0	0	0.0255638	0	0.0594243	0.0234771	0.0259255	0.0255236
Scaffold1262:156257-156582	0	0	0	0.140601	0.154025	0.130733	0.140862	0.116665	0.0255236
Scaffold1262:157894-158187	0	0	0	0.0127819	0.0592404	0.0237697	0.105647	0.0388882	0.0765707
Scaffold1262:180312-180659	0.0302083	0	0.0167881	0.0639096	0	0.0237697	0	0.0388882	0.0255236
Scaffold126:218722-218769	0	0	0	0	0	0	0	0	0.102094
Scaffold126:219539-219922	0	0	0.0167881	0.0255638	0.130329	0.130733	0.258248	0.0907391	0.114856
Scaffold1262:25251-25569	0	0	0	0.0127819	0.0592404	0.0356546	0	0.0518509	0.0127618
Scaffold1262:28657-28746	0.0151042	0	0	0.0127819	0.0355442	0.0237697	0.0821697	0.103702	0.0255236
Scaffold126:263216-263630	0.0755208	0.045515	0.100728	0.0383458	0.0118481	0.0237697	0	0.0388882	0.229712
Scaffold1263:137714-138122	0	0.0151717	0.637946	0.0127819	0.225114	0.0713092	0.0117385	0.0129627	0.0765707
Scaffold126:341908-342452	245.986	211.569	78.3834	82.5712	120.436	146.647	147.389	179.443	150.793
Scaffold126:34520-34823	0	0.0151717	0.134304	0	0.0118481	0.0356546	0.0469541	0.0388882	0.229712
Scaffold12:638588-638839	0	0	0	0.127819	0	0	0.0117385	0.129627	0
Scaffold1264:104645-105120	0	0.18206	0.201457	0.115037	0.201417	0.46351	0.293463	0.272217	0.14038
Scaffold1264:129702-129933	0	0	0	0	0	0	0	0.0129627	0.114856
Scaffold1264:201664-201907	0	0.0151717	0	0	0	0	0.0117385	0.0259255	0.165903
Scaffold126:429032-429408	0	0.0151717	0.0503642	0.0127819	0	0	0	0	0.0255236
Scaffold1264:322927-323299	0.196354	0.394463	0.352549	0.0383458	0.142177	0.0713092	0.0939083	0.0648137	0.0510471
Scaffold126:485454-485613	0	0	0.0167881	0	0.0118481	0.0594243	0	0.0388882	0.0255236
Scaffold126:493841-494135	0	0	0	0.0127819	0.0236962	0.0118849	0	0.0388882	0.0382853
Scaffold1265:71298-71602	0	0	0	0	0.0829366	0.273352	0.199555	0.259255	0.229712
Scaffold126:574767-574983	0.120833	0.0151717	0.0335761	0.0255638	0.0592404	0.0594243	0.0234771	0	0
Scaffold126:598053-598632	0.0755208	0.18206	0.302185	0.421803	0.414683	0.3922	0.39911	0.375919	0.35733
Scaffold126:60126-60470	0	0	0.0839403	0	0.0473923	0.083194	0.129124	0.0388882	0.255236
Scaffold126:603781-604172	0	0	0.0503642	0	0	0.0237697	0.0234771	0.0259255	0
Scaffold126:604454-604607	0	0.0303433	0.386125	0.0127819	0.118481	0.0713092	0.0234771	0	0.0127618
Scaffold126:607766-608054	0	0.0303433	0.0671522	0.0383458	0.0236962	0	0.0586927	0.0259255	0
Scaffold1266:100577-100879	0	0	0.554006	0.345112	0.651644	0.641783	0.469541	0.85554	0.331806
Scaffold1266:101965-102036	0	0.0151717	0.470066	0.0127819	0.130329	0.0237697	0.0586927	0.0129627	0.0382853
Scaffold1266:48969-49209	0	0	0.0167881	0.102255	0.0592404	0	0	0.0388882	0
Scaffold126:65499-65722	0	0.0151717	0.0167881	0.0255638	0.0592404	0.130733	0.140862	0.207404	0.204189
Scaffold1266:81951-82388	0	0.106202	0.386125	0.178947	0.0947846	0.0713092	0.0352156	0.0907391	0.0255236
Scaffold1266:96442-96700	0	0	0.117516	0.0511277	0.0236962	0.0356546	0	0.0129627	0
Scaffold1267:137709-138125	0.135937	0.0303433	0.0839403	0.0127819	0.0236962	0.0237697	0.0117385	0.0129627	0
Scaffold1267:16008-16678	2.68854	2.53367	18.4669	44.2638	63.8849	74.1497	76.007	90.078	67.3312
Scaffold1268:115948-116254	0	0	0	0.0127819	0.0118481	0.0594243	0.140862	0.0648137	0.0893325
Scaffold1268:14598-14994	0	0	0.100728	0	0	0.0237697	0.0352156	0	0
Scaffold1268:17049-17218	0	0	0.0335761	0.0255638	0.0829366	0.0237697	0.0821697	0.0388882	0.0127618
Scaffold1268:181370-181647	0	0.485493	0.587582	0	0.0118481	0.0118849	0.0234771	0	0
Scaffold1269:132232-132586	0.090625	0.166888	0.0839403	0.0766915	0.24881	0.083194	0.0704312	0.116665	0.0510471
Scaffold12:692927-693012	0	0	0	0	0	0.0356546	0	0.0777764	0.0255236
Scaffold1269:34198-34561	0.0453125	0.0606867	0.117516	0.345112	0.580556	0.87948	0.833436	0.842578	1.4038
Scaffold1269:36134-36462	0	0.136545	0.318973	0.115037	0.0829366	0.0356546	0.0352156	0.207404	0.0510471
Scaffold12:694126-694606	0	0.0151717	0.0167881	0.102255	0.106633	0.213928	0.39911	0.362957	0.459424
Scaffold1269:41303-41525	0.18125	0.166888	0.0839403	0.0639096	0.0118481	0.0237697	0.0469541	0.0907391	0.0127618
Scaffold1269:43714-44004	0.0151042	0.0303433	0.0335761	0.166165	0.0592404	0	0.0117385	0.0518509	0.0255236
Scaffold1269:49931-50322	0.0453125	0.0151717	0.201457	0.0639096	0.0947846	0.0356546	0.0117385	0.0518509	0.0510471
Scaffold1269:68095-68386	0	0.0151717	0	0.0511277	0	0.0118849	0	0.0777764	0
Scaffold12:699129-699300	0	0	0	0.0127819	0.118481	0.0356546	0.0234771	0.0777764	0.0255236
Scaffold1270:45656-45892	0	0.0151717	0.352549	0	0.0829366	0	0	0	0
Scaffold127:1030188-1030487	127.6	100.861	8.61227	9.65035	19.3242	19.9666	20.8946	27.131	27.5399
Scaffold127:1030545-1031201	0.589062	0.697897	0.436489	0.140601	0.0473923	0.083194	0.0352156	0.0648137	0.102094
Scaffold127:1034140-1034296	0	0	0.0671522	0.0383458	0.0118481	0.0950789	0.0586927	0.103702	0.0893325
Scaffold127:1061456-1061694	0	0	0.0503642	0.0127819	0.0355442	0.0118849	0.0234771	0.0388882	0.0510471
Scaffold127:1180862-1181049	0	0	0	0	0	0	0	0.0259255	0.0510471
Scaffold12:713662-713820	0	0	0	0	0.0592404	0.0594243	0.0352156	0.0388882	0.0255236
Scaffold12:715231-715590	0	0	0	0.0639096	0.154025	0.130733	0.0352156	0.129627	0.0255236
Scaffold1272:126279-126404	0	0	0.0335761	0.0383458	0	0.0475395	0.0352156	0.0907391	0.0255236
Scaffold1272:17816-18082	0	0	0	0.357894	0.0118481	0.0237697	0.0117385	0.816652	0.0255236
Scaffold1272:210235-210787	6.79687	5.17354	0.436489	0.741351	1.10187	2.40074	3.72112	2.96847	3.0373
Scaffold1272:21870-22137	0	0	0	0.127819	0.0236962	0.0356546	0	0.362957	0.0127618
Scaffold1272:234902-235276	88.5104	58.5778	3.74374	14.2263	9.33629	14.6659	18.2065	27.844	17.9941
Scaffold1272:243398-243775	0	0.121373	0.0335761	0	0.0118481	0.0594243	0.0117385	0.0129627	0.0255236
Scaffold1272:253757-253760	0.0151042	0	0	0.0511277	0	0	0.0234771	0	0
Scaffold1272:259841-260273	0.0302083	0.0151717	0.923343	0.33233	0.402835	0.249582	0.352156	0.259255	0.229712
Scaffold1272:268385-268617	0	0	0	0.0255638	0.0118481	0.178273	0.164339	0.155553	0.0510471
Scaffold1272:31280-31447	0.0453125	0	0	0.0639096	0.118481	0.0118849	0.0352156	0.0259255	0.0127618
Scaffold12723:941-1291	0.0302083	0.045515	0.0335761	0.0383458	0	0	0	0.0129627	0.0255236
Scaffold127:247787-247854	0	0	0	0.0127819	0.0355442	0.083194	0.0352156	0.0129627	0.0127618
Scaffold127:257223-257552	0.0151042	0.0303433	0.0671522	0.0255638	0.0236962	0	0.0586927	0.0388882	0.0255236
Scaffold1272:74809-75540	0	0.0606867	0.570794	0.383458	0.130329	0.273352	0.281725	0.42777	0.408377
Scaffold1272:77679-77936	0	0.0151717	0.386125	0.0511277	0.177721	0.273352	0.152601	0.168516	0.127618
Scaffold127:30887-31191	0.0151042	0.045515	0.0503642	0.0127819	0.0118481	0	0	0.0129627	0
Scaffold127:326869-327206	0	0.106202	0.151093	0.0255638	0.0473923	0	0.0234771	0	0.0127618
Scaffold127:327376-327592	0	0.0151717	0.235033	0.0255638	0.201417	0.309006	0.39911	0.207404	0.446662
Scaffold127:328311-328599	0	0	0.167881	0.102255	0.0710885	0.0237697	0.0352156	0.0648137	0.0255236
Scaffold127:334584-334876	0	0.0303433	0.0167881	0.421803	0.331746	0.213928	0.0821697	0.362957	0.0510471
Scaffold127:336403-336436	0	0	0.0167881	0	0.0473923	0.0356546	0	0.0388882	0
Scaffold1273:42050-42159	0	0	0.0503642	0.0255638	0.0355442	0.0237697	0.0352156	0.181478	0
Scaffold127:371250-371358	0.0302083	0.0303433	0.0503642	0	0	0.0713092	0	0.0388882	0
Scaffold127:376333-376711	0.0151042	0.045515	0	0.0127819	0	0.0356546	0.0117385	0.0259255	0.0255236
Scaffold1273:81305-81541	0	0.0303433	0.0335761	0.0127819	0	0	0	0.0518509	0
Scaffold127:392709-393000	0.256771	0.166888	0.201457	0.191729	0.0710885	0.083194	0.0469541	0.129627	0.0382853
Scaffold127:427926-428301	0	0	0	0	0	0.0475395	0.0469541	0	0.0638089
Scaffold127:429943-430308	0	0	0.0671522	0	0.0473923	0.0594243	0.0939083	0.0129627	0.0382853
Scaffold127:433361-433657	0	0.0303433	0.0503642	0.0766915	0.106633	0.118849	0.223032	0.181478	0.0255236
Scaffold127:434596-434874	0	0	0	0.0255638	0.0236962	0.0237697	0.0234771	0.0648137	0
Scaffold127:436427-436692	0	0	0.134304	0	0.0236962	0.0594243	0.0352156	0.0129627	0
Scaffold127:438371-438516	0	0	0.0335761	0.0127819	0.0236962	0.0356546	0	0	0
Scaffold127:442250-442609	0	0	0.134304	0	0	0.0237697	0.0234771	0.0648137	0.0510471
Scaffold127:443327-443627	0	0	0.235033	0.0894734	0.0473923	0.142618	0.0586927	0.0777764	0.0255236
Scaffold127:444894-445144	0	0	0.0671522	0.115037	0.0236962	0.0237697	0.0821697	0.0518509	0.0765707
Scaffold1274:50745-51152	0	0	0	0.703005	0.0355442	0.0594243	0.0586927	0.907391	0.0255236
Scaffold127:45079-45303	0	0	0	0	0	0	0.0469541	0.272217	0.0510471
Scaffold1274:51528-51587	0	0	0	0.0511277	0	0.0237697	0	0.0648137	0
Scaffold1274:52243-52299	0	0	0	0.0766915	0.0236962	0.0237697	0	0.129627	0
Scaffold127:453397-453664	0	0	0.0671522	0	0	0	0.0117385	0.0129627	0
Scaffold127:456747-457042	0	0	0	0	0	0.0713092	0.0586927	0.0777764	0.0638089
Scaffold1274:84553-84895	0.0302083	0	0	0.0255638	0.0236962	0	0.0234771	0.0259255	0
Scaffold127:495239-495562	0	0	0	0.626314	0.0236962	0.0118849	0	0.388882	0.0255236
Scaffold1275:100926-101123	0	0.0151717	0.0671522	0.0511277	0.0355442	0.0475395	0.0704312	0.0648137	0.0382853
Scaffold1275:104059-104577	0	0.0606867	0.100728	0.0127819	0.0710885	0.0237697	0.0352156	0.0518509	0.0127618
Scaffold1275:104855-105309	0.0151042	0	0.167881	0.0639096	0.0236962	0.0237697	0.0469541	0.0129627	0.0765707
Scaffold1275:119567-119895	0	0.0303433	0	0.0766915	0.0118481	0	0.0352156	0.0388882	0.0382853
Scaffold127:513411-513773	0.0755208	0.0151717	0.0839403	0.217293	0.272506	0.356546	0.293463	0.324068	0.127618
Scaffold1275:20267-20648	37.3828	27.4759	0.940131	5.52179	9.47846	15.1057	17.3378	18.42	17.7516
Scaffold1275:206798-207314	0	0.0303433	0.184669	0.0639096	0.0592404	0	0.0117385	0.103702	0.0255236
Scaffold1275:207485-207768	0	0	0.0671522	0	0	0	0	0.0129627	0.0255236
Scaffold1275:230257-230478	0	0	0.0671522	0.0255638	0.0118481	0.0237697	0.0234771	0.0777764	0
Scaffold1275:231314-231507	0	0.0606867	0.0335761	0	0.0236962	0	0	0.0129627	0.0127618
Scaffold1275:25322-25601	0	0.0303433	0.201457	1.27819	2.84354	4.30232	4.57803	4.10919	4.35177
Scaffold127:532502-532825	0	0	0.0503642	0.0127819	0.0473923	0.0594243	0.0117385	0.0388882	0.0255236
Scaffold127:535735-536076	0	0	0.0503642	0.0511277	0.154025	0.0594243	0.0586927	0	0.0127618
Scaffold127:540053-540540	0	0.045515	0.184669	0.0511277	0.0947846	0.166388	0.105647	0.0648137	0.0127618
Scaffold127:540902-541004	0.0453125	0.0151717	0.0839403	0.0127819	0.0355442	0.0356546	0.0352156	0.103702	0.0893325
Scaffold127:541883-542180	0	0	0	0.0639096	0.0355442	0.0356546	0.0939083	0.0259255	0.0127618
Scaffold127:546959-547317	0.0151042	0.515837	2.21602	0.357894	0.841214	0.891365	0.504757	0.790727	0.395615
Scaffold127:547631-548142	0.120833	0.303433	3.03864	0.447367	0.983391	0.665552	0.434326	0.544435	0.229712
Scaffold127:548149-548313	0.0151042	0.0151717	0.100728	0.0639096	0.0473923	0.0356546	0.0352156	0.116665	0.0382853
Scaffold127:549231-549694	0	0.0151717	0.453278	0.536841	0.36729	0.356546	0.258248	1.6333	0.21695
Scaffold127:552183-552523	0	0	0.0503642	0.0127819	0.0947846	0.0475395	0.0117385	0.0518509	0.0510471
Scaffold127:555962-556018	0.0151042	0.0303433	0.0671522	0.0766915	0.0710885	0.0713092	0.0469541	0.0388882	0
Scaffold127:562814-562997	0	0	0	0.0511277	0.0236962	0	0.0234771	0	0
Scaffold127:585887-586082	0	0	0	0	0.0236962	0.106964	0.152601	0.0907391	0.0893325
Scaffold1275:95310-95865	0	0.0606867	0.117516	0.0639096	0.0710885	0.0713092	0.0821697	0.0907391	0.0638089
Scaffold127:603347-603736	0.0302083	0	0.0167881	0	0	0.0237697	0.0939083	0.0388882	0.114856
Scaffold127:608795-609174	0	0	0	0.0127819	0	0	0.0352156	0.103702	0.0638089
Scaffold127:610594-610706	0	0	0.0167881	0.0127819	0	0.0237697	0.0469541	0.0388882	0.0638089
Scaffold1276:112161-112447	0	0	0	0.0127819	0.0592404	0.0356546	0.0352156	0.0129627	0.0510471
Scaffold1276:116239-116543	0	0	0	0.0255638	0.0473923	0.0237697	0.0469541	0.0518509	0.0127618
Scaffold127:612908-613330	0	0	0	0.0127819	0.0118481	0	0.0352156	0.0648137	0.0765707
Scaffold1276:154959-155362	0	0	0	0	0.0355442	0.0713092	0.0234771	0.155553	0.0510471
Scaffold127:616714-617093	0	0	0	0.396239	0.0947846	0.190158	0.176078	1.86663	0.267997
Scaffold1276:174028-174738	14.8927	12.5621	4.81817	8.92178	18.1157	19.0752	19.9086	18.8997	17.6878
Scaffold1276:204989-205170	0	0	0.0335761	0.0127819	0.106633	0.0475395	0.0469541	0	0.0510471
Scaffold1276:205321-205696	0.0151042	0.045515	0.470066	0	0.142177	0.0594243	0.0352156	0	0.0510471
Scaffold127:621391-621631	0	0	0	0	0	0	0.0586927	0.233329	0.0638089
Scaffold127:625634-625884	0	0	0	0.0127819	0.0592404	0.0237697	0.0821697	0.349994	0.178665
Scaffold127:626166-626474	0	0.0151717	0.134304	0.0383458	0.106633	0.0237697	0.0469541	0.181478	0.127618
Scaffold127:628182-628596	0	0.0151717	0	0.383458	0.165873	0.0713092	0.199555	1.37405	0.331806
Scaffold1276:283986-284207	0	0.045515	0.0671522	0	0.0118481	0.0594243	0.0704312	0.0518509	0.0382853
Scaffold127:629703-629969	0	0	0	0.204511	0.0236962	0	0.0821697	0.544435	0.102094
Scaffold127:630228-630633	0	0	0.0335761	0.0511277	0.0118481	0	0	0.14259	0.0382853
Scaffold1276:334888-335081	0	0	0.0839403	0	0	0	0.0117385	0	0
Scaffold1276:353642-353997	0	0	0.0167881	0.0127819	0	0.0713092	0.117385	0.0648137	0.49771
Scaffold1276:386419-386730	0	0	0.0167881	0.0639096	0.0592404	0.0713092	0.0586927	0.0518509	0.0893325
Scaffold127:639298-639603	0	0.0151717	0	0.0127819	0	0	0	0.0777764	0.0127618
Scaffold1276:399118-399947	0.18125	0.257918	2.85397	3.08044	2.58288	2.88802	3.61547	5.89804	4.607
Scaffold1276:400527-400887	0	0	0.251821	0.127819	0.177721	0.154503	0.152601	0.168516	0.0510471
Scaffold1276:400922-401398	0	0	0.0839403	0.140601	0.130329	0.0950789	0.105647	0.181478	0.165903
Scaffold1276:401458-401584	0	0	0.0335761	0.0255638	0.0355442	0.0594243	0.0117385	0.0648137	0.114856
Scaffold1276:402070-402311	0	0	0.0335761	0.140601	0.0236962	0.0713092	0.129124	0.220366	0.0255236
Scaffold1276:402427-402973	0	0.0151717	0.184669	0.0639096	0.0473923	0.0950789	0.0939083	0.14259	0.14038
Scaffold1276:405518-405862	0	0.0151717	0.151093	0.0766915	0.0710885	0.0356546	0.0821697	0.0648137	0.14038
Scaffold1276:406531-406897	0	0.0151717	0.302185	0.127819	0.177721	0.0594243	0.117385	0.155553	0.229712
Scaffold1276:407337-408157	0	0	0.940131	0.255638	0.24881	0.178273	0.187817	0.298143	0.178665
Scaffold1276:426811-427211	0	0	0.0335761	0.0255638	0.0236962	0	0.0352156	0.0129627	0
Scaffold127:642803-643135	0	0	0	0.0127819	0.0236962	0.0475395	0	0.362957	0.0255236
Scaffold1276:60032-60395	0	0	0.0503642	0.0255638	0.379139	0.225812	0.164339	0.220366	0.153141
Scaffold127:678853-679193	0.0151042	0.0151717	0.100728	0.0127819	0	0.0118849	0.0234771	0	0
Scaffold127:693670-693925	0	0	0.0167881	0	0.0118481	0.0594243	0.0352156	0.0518509	0.0765707
Scaffold127:712947-713374	0.0302083	0.0151717	0.0335761	0.0639096	0.0592404	0.118849	0.117385	0.0907391	0.0765707
Scaffold12772:413-672	0	0.0303433	0.419701	0.115037	0.106633	0.273352	0.164339	0.0907391	0.165903
Scaffold127:756499-756868	0	0.0303433	0.0671522	0.0255638	0.0473923	0.0237697	0	0.0907391	0
Scaffold1277:6817-7241	0	0	0.201457	0.0894734	0.0118481	0.0118849	0	0.0259255	0
Scaffold127:776688-776760	0	0	0.0335761	0.0255638	0	0.0118849	0.0117385	0.0259255	0.0765707
Scaffold127:785021-785223	0	0	0	0.0383458	0.0236962	0.0356546	0.0117385	0.0777764	0.0127618
Scaffold1278:107443-107573	0	0.0151717	0.302185	0.0127819	0.0592404	0.0356546	0.0234771	0	0.0255236
Scaffold1278:111622-112019	0	0	0	0.0766915	0.0118481	0.225812	0.140862	0.362957	0.127618
Scaffold1278:142294-142643	0	0	0	0	0.0710885	0.0594243	0	0.0129627	0
Scaffold12:783482-783831	0.649479	1.45648	0.486854	0.0894734	0.343594	0.083194	0.305202	0.233329	0.127618
Scaffold127:856452-856947	0.0755208	0.227575	0.671522	0.255638	0.0710885	0.0594243	0.0704312	0.311106	0.0638089
Scaffold127:879469-879679	0	0	0.0671522	0	0.0236962	0.0118849	0.0117385	0.0129627	0
Scaffold1278:85654-86033	0.0453125	0.045515	0.0503642	0	0	0	0	0	0
[truncated: 16,079 more rows]

## Sheet: README
Supplemental Table S5: CAGE-seq expression data (TPM) of all eRNA peaks.
