# Supplementary material for: Global patterns of enhancer activity during sea urchin embryogenesis assessed by eRNA profiling
Source: HighWire-hosted journal article supplement (doi:10.1101/gr.275684.121), 2021-07-30
Supplement: Supplemental_Table_S6.xlsx [file Supplemental_Table_S6.xlsx]

## Sheet: Sheet1
Gene	0 hpf	6 hpf	12 hpf	18 hpf	24 hpf	30 hpf	36 hpf	42 hpf	48 hpf
SPU_005572	5693.71	4643.32	6173.32	3901.97	5115.88	3281.39	2292.86	2359.01	1446.64
SPU_012384	0	41.585	99.325	67.3	52.945	42.16	44.305	101.685	35.43
SPU_014722	0.03	9.67	0.45	0.215	0.1	0.21	0.11	0.63	0.105
SPU_019002	0	27.38	65.225	44.715	39.595	27.46	29.115	70.005	15.68
WHL22.10029	0	0	0	0.1	0.02	0.075	0.975	2.46	0.67
WHL22.100340	377.79	317.025	89.3	50.06	60.925	63.835	62.415	92.375	51.025
WHL22.100348	217.975	227.59	116.575	41.105	24.145	20.58	16.775	21.945	16.6
WHL22.100432	0	0	0	0.675	1.06	0.96	0.96	0.85	0.505
WHL22.100480	245.955	229.61	41.71	58.755	121.2	161.24	150.41	178.385	127.725
WHL22.100574	41.07	37.75	30.965	19.675	39.595	43.26	47.86	50.4	27.69
WHL22.100613	1.295	1.29	2.355	1.95	0.84	1.425	1.41	1.11	1.095
WHL22.100681	0	0	0	0	0.38	2.175	3.82	1.435	7.56
WHL22.100773	0	0.815	4.2	0.84	0.14	0.465	7.18	4.375	38.21
WHL22.100800	3.77	3.25	12.035	10.695	14.035	24.97	38.115	28.695	45.655
WHL22.100869	404.295	369.08	341.3	302.58	293.36	265.705	344.31	349.255	344.915
WHL22.100872	0.175	0.145	1.795	4.26	9.75	12.52	13.375	23.495	21.07
WHL22.100887	60.295	57.895	48.825	90.01	136.395	168.755	167.225	153.29	140.275
WHL22.100920	0	0	0.055	0.265	0.26	0.56	0.555	0.61	0.42
WHL22.100932	0	0.225	11.31	8.79	4.755	2.425	2.41	3.655	1.955
WHL22.100947	92.885	74.125	18.815	5.2	3.52	50.935	4.49	3.74	3.72
WHL22.100974	41.245	40.13	0	2.05	1.835	0.02	0	0	1.065
WHL22.101043	53.27	54.575	38.295	47.365	65.575	77.89	81.56	83.375	89.165
WHL22.101051	1.04	0.74	0	0.145	0.2	0.25	0.455	0.57	0.86
WHL22.101075	10.535	10.88	43.335	50.42	65.58	76.16	88.475	71.49	150.435
WHL22.101088	0.03	0.11	0.165	0.12	0.6	0.575	1.01	1.175	2.415
WHL22.101120	0	0	0	0.05	0.1	0	0	0	0
WHL22.101123	0	0	0.225	0.215	0.22	0.5	1.665	1.065	3.905
WHL22.101135	28.205	26.9	3.585	3.18	3.58	4.115	3.29	5.36	4.46
WHL22.101205	7.915	8.67	25.53	31.59	36.395	43.545	40.96	39.64	50.2
WHL22.101263	11.885	10.04	6.775	6.5	4.48	4.58	4.755	4.395	4.35
WHL22.101274	45.875	49.295	71.105	72.33	49.92	52.985	47.63	49.21	41.43
WHL22.101316	0.03	0.035	0.165	0.505	3.24	6.87	14.23	10.945	18.3
WHL22.10147	0	0	0	0	0	0.195	2.75	1.545	9.155
WHL22.10149	6.16	7.67	83.255	150.065	94.785	94.4	87.94	80.18	80.09
WHL22.101542	0	0.035	0	0	0	0.02	0.27	0.02	0.255
WHL22.101602	934.365	1279.96	1283.38	964.49	734.155	730.13	707.63	668.83	612.845
WHL22.101608	0	0	0.34	0	0.04	0	0	0	0
WHL22.101772	75.085	74.895	28.505	17.215	20.83	22.52	21.4	20.785	19.515
WHL22.101773	0.2	0.33	0.22	0.29	0.62	0.635	0.44	0.61	0.545
WHL22.101795	271.85	244.375	42.89	51.12	54.7	81.225	98.68	102.18	100.44
WHL22.101912	3.05	1.55	1.23	0.43	0.7	0.5	0.535	0.585	0.735
WHL22.101942	1.15	2.325	0.505	0.17	0.1	0.095	0.08	0.09	0.125
WHL22.10197	0	0	3.975	10.985	6.335	4.365	3.915	5.355	4.515
WHL22.102196	0.23	0.185	1.905	2.385	2.435	3.615	4.95	3.505	4.725
WHL22.1022	1.265	1.26	7.5	13.53	10.195	11.255	11.175	14.825	9.685
WHL22.10220	0.03	0.035	1.57	2.48	3.76	1.615	1.28	1.545	0.775
WHL22.102207	0	0.11	0.84	1.3	1.22	1	1.165	1.155	0.95
WHL22.102226	0.12	0.185	1.065	4.745	0.3	0.25	0.25	7.225	0.5
WHL22.102241	12.775	12.88	153.695	200	177.075	297.175	440.77	371.79	377.155
WHL22.102258	0.29	0.15	0.055	0	0.12	0.115	0.095	0.065	0.17
WHL22.102285	134.74	137.815	123.68	66.05	85.185	100.43	94.61	91.18	73.885
WHL22.102424	0.06	0.22	1.57	0.335	1.975	7.985	20	10.8	18.99
WHL22.102823	3.255	3.615	1.845	3.635	9.095	22.925	40.255	45.2	58.67
WHL22.102859	14.965	13.21	20.66	34.07	30.42	31.735	32.46	33.15	24.705
WHL22.102982	284.515	288.205	155.65	113.22	66.075	67.06	59.23	62.45	65.29
WHL22.103028	13.265	17.6	9.685	0.94	0.98	0.515	0.59	0.635	0.78
WHL22.103042	60.15	63.02	67.47	35.83	28.185	25.635	33.09	27.21	40.695
WHL22.103100	42.335	43.69	42.495	43.37	36.935	66.915	56.895	57.33	74.625
WHL22.103105	21.095	22.875	25.645	23.525	33.82	52.95	50.8	54.235	60.16
WHL22.103109	402.685	446.805	104.26	68.625	121.58	200.875	245.955	263.23	283.315
WHL22.103680	101.855	99.15	21.835	13.82	14.09	11.425	11.5	15.175	7.33
WHL22.103791	7.855	4.54	6.33	5.105	2.535	2.02	2.98	6.19	4.14
WHL22.103861	1.21	1.845	54.025	356.11	443.61	266.915	174.64	182.48	103.435
WHL22.103885	125.45	130.29	22.395	5.42	0.44	0.135	0.15	1.505	0
WHL22.103924	310.3	297.915	146.075	34.07	4.48	1.845	0.8	6.73	0.295
WHL22.104028	0.145	0.295	0.62	1.35	2.455	3.445	4.395	4.2	4.645
WHL22.104163	1564.24	1627.45	221.885	58.03	17.59	10.29	5.77	20.52	2.06
WHL22.104183	377.825	384.36	328.715	346.045	257.51	192.925	163.71	142.69	115.1
WHL22.104194	1.005	0.705	0.39	0.265	0.06	0.08	0.115	0.02	0
WHL22.104206	312.805	301.165	188.41	68.41	47.47	55.065	44.115	37.14	36.96
WHL22.104215	0.69	1.18	0.45	0.095	0.12	0.12	0.13	0.135	0.04
WHL22.104240	0.06	0.075	0.675	0.58	3.46	4.48	2.39	1.915	1.805
WHL22.104285	0	0.33	1.455	6.645	10.175	11.155	12.59	14.085	9.9
WHL22.104331	0.23	0.15	0.28	0.165	0.22	0.155	0.265	0.155	0.255
WHL22.104346	177.63	166.635	97.25	98.775	189.015	205.875	221.79	231.08	180.75
WHL22.104382	55.66	54.315	24.69	30.775	36.235	51.2	44.895	41.88	34.7
WHL22.104388	34.965	44.645	70.27	70.77	28.08	28.445	35.725	42.925	32.38
WHL22.104393	37.295	30.995	9.235	3.95	13.735	26.295	35.555	31.36	40.09
WHL22.104502	20.24	20.015	3.25	1.9	1.595	1.675	0.92	0.63	0.275
WHL22.104525	1178.68	1198.11	1229.53	883.325	758.89	581.285	550.11	706.595	425.645
WHL22.104556	0.35	0.33	11.42	16.23	7.795	11.81	9.075	8.54	10.695
WHL22.104606	4250.61	4355.37	7028.13	1673.69	1320.47	1352.34	1737.88	1885.83	1593.92
WHL22.104608	3.11	4.39	52.85	83.15	94.8	127.245	113.085	103.195	110.9
WHL22.104617	240.075	284.52	432.07	550.79	366.07	288.36	243.035	256.06	192.32
WHL22.104633	29.415	22.655	2.63	11.655	18.975	22.06	21.285	19.59	18.945
WHL22.104655	2.045	3.355	0	0	0	0	0.055	0	1.965
WHL22.104657	1.18	2.99	1.62	2.38	4.08	6.615	5.98	4.895	5.92
WHL22.104694	69.445	66.12	27.665	29.81	29.56	30.83	37.025	32.64	42.605
WHL22.104719	1.61	1.585	0.95	2.795	2.495	1.885	2.43	5.315	12.31
WHL22.10475	299.25	298.055	32.64	38.72	33.32	33.53	33.145	33.35	22.875
WHL22.104803	1.32	3.06	40.425	149.07	65.575	115.13	220.355	164.935	276.785
WHL22.104814	191.76	169.325	104.865	20.73	7.635	17.425	30.49	29.5	46.11
WHL22.104923	186.005	166.415	341.64	140.335	73.575	74.665	67.88	59.92	51.555
WHL22.104932	14.365	16.64	167.465	23.145	23.525	33.66	32.765	29.775	32.335
WHL22.104935	12.26	13.46	19.595	14.52	32.005	40.785	53.19	27.705	33.825
WHL22.105041	141.995	120.285	44.23	38.165	31.245	40.12	52.535	43.62	46.08
WHL22.105068	42.71	35.865	38.86	5.85	3.48	2.365	1.415	2.005	0.965
WHL22.105071	0.03	0	0.055	0.58	1.695	2.02	3.015	1.55	2.69
WHL22.105077	1.555	1.44	5.99	7.08	23.625	35.685	49.92	30.72	56.515
WHL22.10508	0.69	0.705	0	0	0.1	0.12	0.02	0.02	0.04
WHL22.105086	119.895	124.115	58.735	26.85	24.525	30.81	35.8	24.01	30.87
WHL22.105180	118.83	123.385	119.425	97.28	49.47	41.68	39.985	49.835	34.06
WHL22.10526	102.285	85.86	12.935	19.165	20.49	21.005	21.93	20.545	17.37
WHL22.10553	0.205	0.26	0	0.05	0	0	0	0	0
WHL22.105576	0.52	1.255	15.565	5.08	1.915	2	2.5	10.21	4.37
WHL22.105594	101.45	94.2	15.845	17.555	20.65	24.56	24.09	19.35	26.045
WHL22.10562	8.4	7.895	7.56	2.05	1.14	0.96	0.785	1.325	0.865
WHL22.10570	132.33	115.42	22.285	47.8	51.905	73.525	83.16	91.46	76.9
WHL22.105712	20.755	22.915	9.97	12.665	23.865	24.83	25.58	26.515	27.605
WHL22.105871	49.845	51.03	3.415	10.28	14.77	16.885	14.73	17.94	13.6
WHL22.105880	351.29	360.23	169.71	74.89	124.42	140.25	145.31	169.275	125.44
WHL22.105895	68.84	72.465	50.05	7.49	1.835	2.135	2.14	2.785	2.84
WHL22.105928	8.06	10.15	235.105	11.51	5.075	5.58	5.43	5.96	5.755
WHL22.105959	45.9	43.1	28.05	4	7.89	14.425	21.45	8.73	17.23
WHL22.10598	0.03	0.11	5.825	149.555	217.76	125.995	119.045	91.16	62.01
WHL22.106048	355.81	372.405	18.53	35.805	62.38	58.14	58.235	100.495	63.37
WHL22.106069	0	0.035	0	0.05	0.12	1.98	8.35	3.79	22.105
WHL22.106079	0.72	0.625	0	0.075	0.1	0.02	0.115	0.24	0.04
WHL22.106130	13.815	13.575	5.205	1.275	0.8	0.58	1.57	2.48	3.7
WHL22.106154	0.63	0.625	0.225	1.635	11.35	22.02	36.795	21.55	25.335
WHL22.106324	2.155	1.55	1.735	0.82	1.18	4.615	20.765	13.43	93.26
WHL22.106352	6.65	6.825	4.085	1.47	0.12	0.04	0.055	0.22	0.19
WHL22.106388	0.95	0.775	0.22	0.385	0.04	0.02	0	0.02	0
WHL22.106484	0.235	0.52	0.11	0.095	0.08	0.04	0.04	0.02	0.02
WHL22.10652	0	0	0.28	3.01	1.54	1.845	2.31	7.03	2.915
WHL22.106647	292.235	270.42	156.605	63.76	52.145	51.58	48.965	62.525	43.15
WHL22.106661	672.815	674.56	170.61	134.535	133.875	145.665	129.685	120.465	128.655
WHL22.106737	0.03	0.035	0.28	0.095	0.28	0.15	0.23	0.085	0.21
WHL22.106744	1.21	0.445	0.11	0.12	0.2	0.27	0.21	0.48	0.235
WHL22.106756	73.045	70.065	75.305	167.76	263.065	298.56	303.635	274.685	272.055
WHL22.106873	123.865	56.675	8.79	2.07	0.06	0.06	0.06	0.24	0.085
WHL22.107057	177.425	183.97	165.395	231.375	287.2	301.725	282.62	222.615	211.84
WHL22.107072	1.465	1.07	1.29	4.215	26.665	47.535	66.235	42.535	50.97
WHL22.107148	0	0	0.11	0.145	0.04	0.98	11.465	3.395	19.875
WHL22.107154	0	0	0	0	0.02	0.37	4.7	2.395	42.695
WHL22.107156	0	0	0	0	0	0	0	0	10.67
WHL22.107174	1.065	1.62	61.195	68.48	75.325	58.435	48.43	46.365	34.705
WHL22.107180	0.29	0.665	0.725	11.29	117.485	69.395	56.895	122.945	125.9
WHL22.107294	6.045	7.085	1.625	0.385	0.14	0.08	0.135	0.195	0.335
WHL22.107309	0.03	0.075	0.335	22.8	109.865	102.225	113.56	62.65	117.59
WHL22.107381	0.03	0	0.055	0.12	0.46	2.5	8.805	4.095	29.055
WHL22.10739	0.2	0.075	4.59	1.18	1.14	1.02	0.57	0.675	0.315
WHL22.107394	0.545	0.26	1.29	3.995	7.835	13.385	13.735	10.085	11.35
WHL22.107399	119.815	140.06	143.56	134.895	162.41	233.15	193.415	186.205	192.44
WHL22.10754	17.325	20.405	24.02	18.97	45.15	61.855	73.52	56.685	65.955
WHL22.10760	0	0	0	0.145	0	0	0.44	2.545	0.57
WHL22.107727	189.97	179.475	69.93	41.85	42.85	37.32	33.66	37.535	23.57
WHL22.107796	4.32	5.205	3.47	7.295	10.615	14.905	13.985	11.145	11.02
WHL22.10784	0.145	0.11	3.3	3.76	1.22	3.655	5.08	46.35	9.35
WHL22.107922	9.125	9.56	3.135	1.81	1.2	1.175	1.11	0.935	0.82
WHL22.107951	0	4.76	25.805	2.96	0.18	0.06	0.04	0.695	0.02
WHL22.107953	0	4.725	25.02	2.72	0.16	0.04	0.04	0.695	0.02
WHL22.107980	0	12.25	5.43	1.23	0.28	0.155	0.305	1.33	0.25
WHL22.108070	80.755	74.9	25.815	12.375	23.865	30.41	32.595	29.43	36.37
WHL22.108092	0.145	0.11	0.055	0	0	0	0.02	0	0
WHL22.10812	1.065	0.035	0.28	0.41	0.12	0.535	0.955	16.37	1.935
WHL22.108665	97.3	89.625	91.485	130.73	157.245	204.18	208.32	133.29	237.145
WHL22.108671	5.21	10.625	391.255	232.03	93.29	91.125	90.71	109.18	125.075
WHL22.108672	8.72	10.955	18.59	35.225	73.01	90.57	91.625	97.92	82.305
WHL22.108688	187.15	190.425	245.57	292.965	373.965	330.57	266.495	272.11	150.575
WHL22.108694	196.05	180.88	72.17	49.605	59.5	56.335	58.61	62.71	42.93
WHL22.108732	4.235	4.245	8.01	4.98	4.62	4.175	5.52	11.165	4.365
WHL22.108856	0.03	0	0.785	0.315	0.54	1.33	3.265	3.245	5.735
WHL22.108859	0	0	1.4	0.29	0.1	0.77	5.75	4.985	36.32
WHL22.108904	176.045	168.51	362.135	64.825	53.63	54.74	54.775	52.42	50.16
WHL22.108947	290.875	275.77	309.06	370.165	430.185	439.72	454.22	361.495	432.04
WHL22.1090	24.665	25.83	17.47	12.02	5.795	5.77	6.36	5.4	7.395
WHL22.109000	0.32	0.07	0.39	1.71	0.42	0.33	0.405	0.695	0.21
WHL22.109006	355.46	376.18	269.865	97.715	66.84	80.225	86.91	82.485	70
WHL22.109012	0.12	0.185	0.055	0.075	0	0.04	0.02	0.065	0
WHL22.109021	11.595	13.73	45.465	25.91	13.47	12.965	12.665	12.235	18.215
WHL22.109024	133.395	134.755	40.2	52.47	40.315	36.29	33.645	31.87	28.145
WHL22.109031	188.765	200.06	232.585	239.725	165.195	175.755	147.525	164.545	165.63
WHL22.109091	12.46	11.955	17.525	27.115	52.865	51.965	52.215	50.535	43.095
WHL22.109107	8.805	11.99	175.525	406.87	581.915	332.51	221.14	305.09	194.85
WHL22.109178	30.39	26.125	10.415	6.36	10.375	12.175	13.03	11.295	9.955
WHL22.109244	3.57	4.315	10.135	0.58	0.06	1.52	0.63	1.505	8.92
WHL22.1093	0.26	0.365	0.165	0.385	0.24	0.155	0.17	0.22	0.295
WHL22.109542	0.375	0.185	25.415	120.665	141.135	185.54	214.72	200.09	247.34
WHL22.10991	2.475	2.765	3.08	1.995	2.355	2.1	2.155	2.045	2.265
WHL22.109980	192.16	174.005	22.4	30.365	50.345	58.3	76.71	77.605	95.665
WHL22.11012	2.445	7.525	136.66	96.655	106.54	132.39	173.86	223.66	204.79
WHL22.110170	0	0.035	1.005	2.215	2.195	2	2.175	2.045	2.485
WHL22.110192	0.775	1.22	0.11	0	0.04	0.04	0.02	0.045	0
WHL22.110195	116.095	140.065	158.45	132.215	118.805	115.33	110.83	125.625	101.835
WHL22.110204	104.93	123.46	121	83.485	50.88	48.8	46.595	54.73	48.41
WHL22.110286	0.95	0.665	1.455	8.5	17.665	14.255	21.15	29.785	39.975
WHL22.110295	29.18	27.05	19.545	29.22	56.055	47.185	54.735	44.34	45.16
WHL22.110300	141.14	145.335	34.77	36.215	48.395	51.295	58.155	57.75	43.555
WHL22.110312	61.56	65.495	34.265	48.615	39.435	45.95	39.68	40.875	32.635
WHL22.110321	214.985	233.42	193.325	85.36	20.385	18.62	19.525	27.525	13.74
WHL22.11036	0.03	0.145	0.45	2.575	1.12	1.905	3.365	8.645	28.105
WHL22.110526	141.195	121.13	130.845	115.97	138.34	175.01	190.515	230.455	209.6
WHL22.110529	4.145	3.95	5.82	5.775	9.455	11.93	14.92	17.8	17.21
WHL22.110532	4.055	8.445	254.475	222.055	266.81	59.2	58.02	188.99	86.35
WHL22.110620	44.46	39.15	5.32	14.785	15.97	16.79	18.15	19.57	15.21
WHL22.110625	6.105	5.645	1.905	0.41	0.38	0.4	0.23	0.435	0.38
WHL22.110836	0.03	0	0.225	0.555	7.475	41.045	115.26	53.805	156.165
WHL22.110857	3.02	3.325	3.135	12.64	34	52.49	70.42	53.185	69.4
WHL22.111073	142.085	140.65	99.89	70.77	111.45	141.32	167.265	138.275	160.76
WHL22.111138	35.545	38.19	13.885	7.395	6.535	8.91	10.985	9.425	13.28
WHL22.111577	0	0	1.565	0.36	0.86	1.825	3.65	5.14	4.6
WHL22.111811	653.475	706.405	815.64	571.31	279.355	240.93	212.77	217.41	133.41
WHL22.111821	0.03	0.035	0.505	0.365	3.22	6.5	18.26	10.185	19.1
WHL22.111854	4.145	3.285	1.005	0.12	0.38	0.37	0.325	0.435	0.485
WHL22.111895	15.31	11.99	0.73	3.9	5.155	4.925	4.74	4.18	5.02
WHL22.111908	41.065	30.07	3.92	34.845	61.58	80.86	125.37	446.61	190.97
WHL22.111926	34.595	31.62	33.205	39.92	44.79	53.7	59.21	53.425	43.76
WHL22.112003	453.11	457.6	361.58	318.155	328.67	402.78	470.02	449.485	498.79
WHL22.112015	0	0	0.11	0.025	0.24	0.195	0.06	0.09	0.125
WHL22.112021	0.835	0.775	0.73	0.41	0.42	0.52	0.555	0.505	0.565
WHL22.112289	0.405	0.185	0	0.1	0.12	0.155	0.075	0.175	0.105
WHL22.112300	2.79	2.655	4.365	10.26	18.565	19.985	21.99	20.96	18.175
WHL22.112420	66.08	68.15	22.005	14.425	12.53	16.945	17.195	12.585	15.885
WHL22.112585	0.03	0	0	0.025	0.08	0.02	0	0.045	0.04
WHL22.11259	27.28	23.575	5.04	8.355	11.81	14.305	14.615	16.345	14.75
WHL22.11267	9.35	9.41	3.08	1.71	3.58	5.33	7.34	4.7	8.61
WHL22.112914	0.32	0.11	0.335	69.495	367.61	370.7	405.865	317.055	252.22
WHL22.112926	10.65	11.92	16.12	25.5	33.98	40.97	39.93	29.58	31.795
WHL22.112993	418.915	430.405	55.43	87.65	117.39	111.035	112.505	120.475	112.61
WHL22.113163	0	0	0	0.05	0	0	0.095	0	0
WHL22.113329	70.48	70.105	20.38	5.37	9.195	23.155	33.61	25.475	28.6
WHL22.113339	21.785	22.655	26.765	11.485	12.83	14.79	13.3	10.085	14.14
WHL22.113368	0.12	0.07	6.83	0.965	0.02	0.02	0	0.045	0.06
WHL22.113374	533.865	535.42	92.215	45.295	38.875	40.635	40.35	40.11	34.705
WHL22.11343	0	0	0.055	0.025	0.02	0.04	0.04	1.695	0.105
WHL22.113468	1.265	2.845	97.985	131.355	86.385	79.835	91.99	105.55	46.855
WHL22.113617	0	0	0	0	0.02	0.075	0.19	0.72	0.315
WHL22.113797	42.97	36.49	43.45	41.9	62.48	63.895	67.995	50.74	68.275
WHL22.113848	0	0.44	3.245	1.205	1.32	0.555	0.71	2.355	0.505
WHL22.113894	11.63	13.135	7.78	1.735	1.22	1.48	2.735	1.61	5.695
WHL22.114164	0.03	0	0	0.14	0.44	7.81	22.37	13.74	26.195
WHL22.114176	115.03	120.845	40.705	24.22	34.3	36.39	40.81	35.79	39.89
WHL22.114182	51.57	42.51	42.945	30.99	71.32	69.415	72.145	95.195	87.26
WHL22.11422	86.14	80.435	12.655	5.585	4.58	6.905	7.665	9.49	10.59
WHL22.114255	113.625	115.345	53.3	49.87	63.28	71.11	67.785	75.905	43.72
WHL22.114264	500.075	524.91	443.55	76.425	59.385	44.465	31.22	49.84	16.545
WHL22.114377	0.23	0.15	0.45	0.07	2.095	4.425	7.57	33.745	26.705
WHL22.11441	566.185	611.075	648.92	542.75	621.305	596.185	588.375	601.035	508.025
WHL22.11453	2.275	1.515	0.615	0.265	0.16	0.135	0.225	0.2	0.125
WHL22.114536	0.03	0.07	7.78	15.7	10.87	9.75	11.345	16.395	9.05
WHL22.114584	0	0	0.055	0.025	0	0.095	0.04	0.24	0
WHL22.114590	0	0	2.41	6.045	14.87	18.965	18.395	17.875	15.525
WHL22.114656	5.525	4.76	1.455	0.12	0.06	0.02	0.04	0.085	0.04
WHL22.114666	142.86	137.74	89.025	44.98	69.635	89.435	92.985	81.555	76.36
WHL22.114667	0.78	0.445	3.81	49.675	197.665	301.785	396.2	316.045	338.285
WHL22.114683	2.07	2.4	1.85	0.94	1.615	1.83	1.68	1.765	1.66
WHL22.114702	5.18	5.575	5.435	1.3	1.38	1.115	0.705	1.02	0.57
WHL22.114773	1.64	2.1	6.16	17.75	29.6	33.545	32.42	28.305	28.4
WHL22.114846	0	0.11	0.73	0.505	1.915	5.925	9.075	3.94	13.275
WHL22.114857	1347.92	1159.32	1274.26	638.72	604.105	513.64	436.625	367.285	366.085
WHL22.114906	16.955	17.45	10.975	2.335	0.12	0.115	0.04	0.325	0.02
WHL22.114961	76.815	74.61	25.93	12.955	16.97	17.965	17.71	19.53	16.15
WHL22.114983	0	0	0.055	0	0	0	0	0.11	0.04
WHL22.114989	3.83	3.725	0.73	0.31	0.12	0.25	0.08	0.13	0.085
WHL22.115007	77.935	69.805	57.28	63.57	50.53	49.03	47.59	50.4	58.89
WHL22.115008	5.5	4.685	3.135	5.32	7.035	7.155	7.41	8.3	9.18
WHL22.115078	1.7	1.81	0.84	19.55	57.5	42.99	42.95	33.965	14.835
WHL22.115244	12.435	10.59	12.595	43.125	45.59	51.525	38.115	31.78	33.065
WHL22.115251	9.265	9.15	5.265	16.445	28.9	33.905	37.35	35.79	34.65
WHL22.11539	0	0	0.165	0.05	0.02	0.08	0.02	0.02	0.02
WHL22.115406	18.74	28.93	16.965	4.84	3.035	2.785	1.775	2.415	2.205
WHL22.11541	31.6	19.565	15.285	10.4	5.575	5.79	7.085	6.865	6.455
WHL22.115549	0.03	0.035	0.84	3.42	1.24	4.175	3.855	103.5	7.12
WHL22.115647	6.65	4.24	1.01	1.015	0.7	1.015	0.67	1.48	0.525
WHL22.115687	0.66	0.335	0.28	2.745	1.52	1.94	2.195	11.58	2.165
WHL22.115700	96.9	99.92	97.03	58.97	73.975	79.065	73.915	90.625	40.75
WHL22.115743	89.39	74.865	39.92	17.12	20.265	28.735	25.85	28.93	26.33
WHL22.1161	0	0.035	0	0.385	0.68	0.5	0.63	0.475	0.715
WHL22.11612	0.12	0.335	0.055	0.025	0.34	0.365	1.45	1.57	9.165
WHL22.116189	0.375	0	0	0.24	0.9	2.055	1.665	1.545	1.135
WHL22.116291	170.755	172.28	316.29	464.975	1037.59	1337.61	1426.62	1308.82	1767.08
WHL22.116405	0.49	0.37	0	0	0.04	0	0.04	0	0
WHL22.116408	2.79	2.18	4.2	4.745	3.96	3.75	3.345	4.4	3.38
WHL22.116411	0.835	0.445	0.055	0.075	0.04	0.02	0.11	0.02	0.02
WHL22.116431	108.645	109.515	95.35	76.595	75.39	76.515	75.71	66.145	59.62
WHL22.116455	0	0	0.055	0.145	4.32	7.75	8.235	9.47	9.265
WHL22.116486	54.395	60.515	38.35	14.665	11.335	10.06	11.195	15.35	9.24
WHL22.116692	0.145	0.22	1.79	1.735	2.335	3.365	4.49	5.815	5.76
WHL22.116695	0.03	0	0	0	0	0	0.19	0.26	0.21
WHL22.116741	720.07	726.745	556.25	220.585	160.02	161.28	165.795	189.145	152.005
WHL22.116813	0	0.07	0.45	0.075	1.26	1.615	1.95	3.85	1.16
WHL22.116946	277.065	257.85	18.925	5.56	10.235	25.06	30.605	42.255	20.17
WHL22.116966	180.535	178.485	80.345	33.325	56.165	62.835	66.085	64.68	53.73
WHL22.117131	2.875	3.36	0.895	0.865	0.12	0.155	0.17	0.285	0.105
WHL22.117215	211.185	217.695	266.23	344.285	243.995	244.36	256.56	315.91	322.86
WHL22.117264	0	0	0	0.82	4.48	2.115	2.12	3.375	2.035
WHL22.117282	0.12	0.37	1.34	1.375	0.72	0.21	0.31	0.7	0.295
WHL22.117431	86.365	85.935	38.8	22.005	41.03	49.93	57.675	48.175	49.48
WHL22.117470	0	0	0	0.025	0	0.17	6.685	4.965	66.24
WHL22.117491	0.06	0	0	0	0	0.02	0.785	0.22	6.075
WHL22.117597	0.145	0.11	0.22	0.025	0.14	0.06	0.095	0.065	0.105
WHL22.117605	393.76	416.385	471.43	495.665	393.385	352.735	341.215	437.515	298.8
WHL22.117655	4.26	2.4	0.56	0.385	0.44	0.405	0.55	0.785	0.505
WHL22.117690	0	0.035	0.11	0	0.08	0.135	0.15	0.155	0.215
WHL22.117703	130.115	143.05	92.72	63.4	55.165	45.125	47.705	46.39	31.41
WHL22.117708	32.375	31.915	17.69	12.16	11.97	11.635	11.73	12.865	9.665
WHL22.117840	795.205	705.085	169.65	53.335	39.81	45.08	40.98	35.025	37.03
WHL22.117882	65.675	76.67	57.61	10.885	19.125	27.43	26.845	35.355	20.76
WHL22.118140	190.575	183.675	121.495	63.88	70.495	64.875	69.695	78.265	70.33
WHL22.118191	298.99	303.075	143.11	111.68	92.55	69.95	54.465	64.305	33.645
WHL22.118225	8.805	7.27	1.18	0.6	1.42	1.48	2.08	3.265	1.85
WHL22.118302	199.76	189.145	44.345	46.04	45.37	47.795	39.055	46.37	27.075
WHL22.118336	0.03	0.48	44.96	26.245	94.185	64.855	40.925	32.83	44.155
WHL22.118337	11.17	9.225	3.92	10.185	17.17	16.29	17.365	20.555	18.135
WHL22.118642	26.765	24.685	18.92	24.875	31.765	38.64	40.54	33.115	36.97
WHL22.1187	17.065	15.165	4.14	3.975	2.495	2.17	3.285	5.25	2.92
WHL22.118710	12.115	13.54	19.54	37.59	28.94	25.235	19.98	18.475	15.48
WHL22.119088	0.635	0.035	0.28	0.335	0.18	0.155	0.095	0.24	0.125
WHL22.119171	0	0	0	0	0.16	0.37	0.535	0.26	0.44
WHL22.119241	0.435	0.185	25.14	56.995	73.615	62.485	49.48	48.12	31.105
WHL22.119246	225.285	225.285	80.335	67.43	35.22	25.375	13.335	24.71	4.175
WHL22.119248	19.395	19.745	32.92	25.74	14.475	16.25	21.325	17.805	22.755
WHL22.119288	235.1	201.98	58.23	56.535	65.195	71.33	74.07	60.105	54.475
WHL22.119325	226.725	230.615	131.07	48.69	38.3	48.755	51.105	46.005	38.715
WHL22.119331	0.545	0.665	0.055	0.1	0.04	0	0.02	0	0.04
WHL22.119348	1.755	1.805	19.37	7.275	11.035	17.325	23.285	16.11	29.89
WHL22.119352	3.51	3.32	4.145	3.66	4.34	6.37	10.375	9.49	11.065
WHL22.119358	16.26	18.23	6.665	7.365	11.81	14.595	14.995	13.48	14.18
WHL22.119383	104.215	100.805	3.98	4.38	8.835	9.98	10.2	8.055	9.05
WHL22.119385	31.255	35.975	28.275	14.205	10.955	8.285	8.48	6.035	4.85
WHL22.119401	452.705	445.39	74.69	58.61	72.725	78.675	69.64	80.345	65.32
WHL22.119403	101.13	112.545	199.71	212.475	150.82	158.575	154.295	143.605	165.41
WHL22.119419	75.75	80.545	73.295	77.61	88.08	83.475	80.83	74.79	93.68
WHL22.119462	9.525	10.11	6.325	76.04	71.475	115.745	133.79	152.295	158.285
WHL22.119485	0	0.33	3.47	11.075	12.35	14.73	14.73	10.055	13.49
WHL22.119492	26.625	24.5	58.285	186.21	240.995	274.285	320.39	280.96	304.29
WHL22.119525	223.475	153.645	139.64	241.465	452.17	750.64	955.36	854.885	1299.33
WHL22.119534	94.455	86.155	37.01	26.56	20.45	19.965	17.06	19.37	15.88
WHL22.119567	17.7	20.075	81.13	83.245	88.255	87.905	91.455	67.245	70.645
WHL22.119578	0.145	0.11	14.22	52.49	70.75	80.15	77.245	56.39	69.165
WHL22.119629	39.37	30.105	24.745	95.975	142.41	163.54	140.84	121.89	190
WHL22.119632	0.09	0.145	0.84	1.685	3.02	5.535	4.49	3.03	2.775
WHL22.119641	0.72	2.03	52.3	96.965	78.635	68.43	65.475	67.14	68.81
WHL22.119644	120.5	118.88	65.85	111.345	155.82	157.905	154.065	145.81	129.63
WHL22.119652	493.06	533	420.49	264.73	317.33	326.76	278.605	267.13	261.52
WHL22.119725	12.345	7.9	3.025	2.07	1.4	1.25	1.53	1.26	1.58
WHL22.119815	17.41	15.975	11.48	3.875	3.48	5.195	6.78	6.075	4.79
WHL22.119881	0.175	0.22	0.505	38.07	168.965	150.795	117.365	61.1	84.105
WHL22.119959	0.12	0.035	0.615	1.975	25.095	28.21	113.505	64.415	339.91
WHL22.119983	130.6	136.225	578.08	251.215	150.735	161.715	174.465	175.25	157.975
WHL22.119986	0.375	0.26	0.17	0.24	0.04	0.06	0.02	0.48	0.02
WHL22.119996	1063.29	1186.32	866.21	413.39	366.48	315.965	288.56	343.86	286.39
WHL22.120016	11.025	11.775	10.805	12.4	20.265	30.775	35.19	31.59	33.635
WHL22.120017	103.09	115.715	83.035	57.045	45.975	55.355	53.665	55.78	52.88
WHL22.120026	243.935	235.66	52.52	21.865	19.525	25.37	37.92	29.195	42.055
WHL22.120071	180.42	196.295	199.27	91.525	89.865	116.955	129.725	121.61	128.84
WHL22.12014	73.615	18.195	131.18	302.005	768.49	1208.16	1549.43	1525.38	1735.28
WHL22.120750	18.765	17.97	8.68	5.73	3.9	4.31	6.4	5.38	9.915
WHL22.120758	0	0	0	0.025	0	0	0.075	0.175	3.615
WHL22.120853	15.165	7.97	2.185	1.875	3.5	2.94	3.325	6.53	3.3
WHL22.120870	107.175	110.365	72.68	21.53	20.27	20.255	19.925	24.035	14.735
WHL22.120873	54.45	47.345	7.505	9.125	48.325	76.78	88.725	99.135	86.42
WHL22.120874	17.93	16.755	1.29	0.335	0.76	1.9	1.775	1.175	1.365
WHL22.120892	61.905	62.985	57	35.615	34.56	46.1	46.805	44.25	49.945
WHL22.120896	53.585	53.395	109.295	79.1	60.465	52.01	47.115	61.69	37.7
WHL22.120939	0.175	0.44	0.17	0.195	0.38	0.48	0.265	0.155	0.42
WHL22.120945	51.89	43.87	467.005	206.575	78.93	83.6	72.405	78.01	92.02
WHL22.120984	0	0	0.22	0.095	0.16	0.155	0.13	0.325	0.06
WHL22.121109	0.06	0.035	0.395	1.325	1.835	3.27	3.36	3.9	4.77
WHL22.12122	1.84	2.145	6.33	21.24	27.68	47.945	59.8	75.66	54.325
WHL22.121322	15.315	16.27	13.605	5.9	6.195	5.135	4.315	4.875	3.445
WHL22.121375	19.255	17.195	14.445	15.365	26.625	29.18	29.115	29.415	22.825
WHL22.121380	3.915	3.36	6.665	17.19	27.545	22.905	22.905	24.55	14.325
WHL22.121456	0.23	0.295	11.87	10.355	11.59	10.91	13.985	13.435	13.365
WHL22.121483	6.705	9.965	58.73	25.815	45.635	59.89	58.04	49.235	39.52
WHL22.121654	0.09	4.83	237.785	77.03	145.37	112.42	100.72	118.895	73.195
WHL22.121729	263.825	236	211.19	236.87	189.795	159.84	143.535	152.3	122.27
WHL22.121768	0.515	0.37	2.35	1.735	0.8	0.88	0.9	1.305	0.86
WHL22.121777	0	0	0	1.445	1.22	1.715	1.335	1.875	1.03
WHL22.12194	1486.73	1570.07	932.835	298.265	236.125	220.18	222.38	232.26	188.275
WHL22.121963	92.185	96.085	12.6	10.255	11.15	9.31	10.11	14.8	9.915
WHL22.12203	2.615	0.92	0.95	0.6	0.44	0.365	0.34	0.61	0.29
WHL22.12207	526.785	545.04	457.28	298.295	212.085	238.955	271.065	333.035	271.18
WHL22.12209	34.19	32.545	28.555	30.745	57.46	66.485	72.025	94.195	67.18
WHL22.122099	96.695	98.63	112.145	225.715	356.105	401.025	422.62	348.39	388.385
WHL22.122101	93.215	103.17	111.745	135.615	203.935	237.38	237.02	247.39	259.26
WHL22.122167	32.375	33.87	6.27	2.145	1.935	1.445	1.395	1.76	1.285
WHL22.122209	0	0	1.905	19.96	13.77	12.345	11.235	13.585	10.065
WHL22.122424	0	0.035	2.69	13.145	21.53	41.005	60.965	64.235	84.035
WHL22.122619	0	0	0	0	0	0	0.075	0.02	0.52
WHL22.122762	0.66	0.665	0.445	0.12	0.04	0.06	0.13	0.11	0.165
WHL22.123215	3.6	8.52	723.71	374.14	94.425	82.57	91.435	182.53	93.655
WHL22.123232	21.815	22.135	7.725	10.79	12.435	17.445	19.735	19.09	19.95
WHL22.123524	42.16	37.265	42.77	48.155	55.625	69.3	73.04	58.905	58.995
WHL22.123729	78.915	84.755	26.875	10.16	23.185	29.31	48.885	40.505	73.605
WHL22.123745	118.085	117.22	66.17	39.75	51.665	55.915	52.885	57.4	43.97
WHL22.123763	7.77	6.9	14.165	35.565	49.71	52.07	54.125	49.33	40.755
WHL22.123772	207.815	222.895	284.265	160.22	134.46	146.96	137.73	155.26	172.005
WHL22.123928	0.03	0.075	0	0.025	0.08	0.02	0.04	0.09	0
WHL22.123936	0.32	1.51	54.7	92.775	48.705	27.215	24.895	29.76	40.3
WHL22.123939	67.4	66.08	27.6	30.075	28.46	28.39	27.565	32.28	24.69
WHL22.123976	229.665	245.03	222	88.61	86.82	90.75	86.62	114.435	86.145
WHL22.123987	0.09	0	0.95	38.6	120.94	134.445	110.77	86.26	56.165
WHL22.124051	291.305	343.66	89.425	11.7	1.04	0.48	0.59	4.135	0.46
WHL22.124093	0.06	0.035	0	0.6	0.76	0.73	0.555	0.61	0.15
WHL22.124257	60.9	59.96	45.635	14.35	29.8	32.215	34.945	33.02	31.405
WHL22.124334	173.565	167.74	147.52	196.875	173.845	388.815	559.39	726.02	689.15
WHL22.124379	287.74	280.215	221.165	106.385	95.4	104.095	126.78	123.46	154.085
WHL22.124535	112.96	110.13	112.145	128.415	193.045	222.72	206.235	216.145	179.025
WHL22.124698	99.64	56.71	8.905	3.255	0.2	0.06	0.04	0.305	0.04
WHL22.124701	12.115	18.415	8.23	1.055	0.9	0.46	0.405	0.61	0.25
WHL22.124766	150.805	131.8	73.4	13.34	17.41	24.98	35.305	22.29	33.545
WHL22.124787	483.76	463.44	100.89	68.625	70.255	91.76	98.505	235.985	97.35
WHL22.124861	24.38	23.615	17.08	33.23	32.18	44.39	60.81	55.365	61.76
WHL22.124951	39.4	44.615	33.815	24.7	28.84	31.91	28.35	24.58	24.585
WHL22.124991	0.32	0.59	98.095	234.58	93.515	40.2	24.01	60.475	17.99
WHL22.125013	126.575	117.33	92.155	34.965	43.245	49.005	48.3	43.06	53.915
WHL22.125061	0.03	0.035	0	0	0.04	0.08	0.06	0.175	0.02
WHL22.125220	2.13	2.175	5.205	29.06	45.09	50.99	55.98	46.325	51.53
WHL22.125221	27.225	26.565	17.13	21.91	28.68	36.945	32.995	26.93	23.2
WHL22.125362	0	0.07	2.575	1.18	0.8	1.54	3.04	1.63	3.21
WHL22.126248	2.795	2.475	8.34	26.415	21.845	22.425	21.095	22.38	27.37
WHL22.126269	320.81	315.545	32.92	137.25	121.8	150.94	162.855	137.5	160.815
WHL22.126276	0.665	0.665	49.66	54.32	54.54	53.49	49.73	44.15	38.98
WHL22.126320	0.23	0.22	0.395	2.34	6.975	7.29	10.03	7.645	7.54
WHL22.126335	11.165	11.325	25.585	32.965	49.405	59.22	62.645	72.36	42.615
WHL22.126336	114.425	118.33	132.875	109.92	48.635	40.635	41.995	62.87	47.36
WHL22.126343	46.195	59.59	70.55	88.66	69.65	91.07	86.645	128.895	123.75
WHL22.126388	55.26	59.225	28.665	6.695	7.855	7.525	7.985	9.475	7.36
WHL22.126389	0.2	0.145	0	0.05	0.04	0	0.02	0.045	0.06
WHL22.126474	0.375	0.74	1.68	21.985	4.4	5.195	9.665	21.46	30
WHL22.126491	13.93	14.095	7.56	3.3	5.775	7.98	9.305	7.75	8.78
WHL22.126516	109.475	118.81	41.04	21.575	22.545	20.6	19.315	24.685	16.24
WHL22.126519	18.25	19.41	7.95	6.645	12.29	19.405	21.075	22.565	25.02
WHL22.126531	124.185	122.5	109.405	106.36	115.945	130.38	132.78	145.02	133.915
WHL22.126542	426.225	385.285	408.67	240.845	116.38	120.47	131.9	142.96	123.52
WHL22.126546	324.86	346.06	562.305	777.01	751.54	389.68	247.235	319.39	174.775
WHL22.126588	151.785	149.615	4.76	21.235	30.995	38.26	43.6	40.75	45.46
WHL22.126611	0.29	0.7	0.11	3.685	22.825	30.1	42.55	30.865	47.795
WHL22.12679	1.38	1.695	1.4	0.265	0.32	0.135	0.08	0.195	0.21
WHL22.12683	113.365	113.68	160.235	73.8	52.125	47.255	50.325	57.34	41.325
WHL22.126839	86.34	71.805	70.155	24.485	22.685	38.45	40.14	44.065	40.535
WHL22.12689	15.86	13.985	6.38	3.78	4.24	20.845	58.785	29.495	110.78
WHL22.12691	406.43	441.37	755.625	686.38	652.15	732.71	627.735	538.41	279.055
WHL22.126947	85.965	71.58	12.26	5.925	8.39	9.52	9.155	7.78	8.15
WHL22.126954	75.375	67.38	39.81	37.705	29.1	31.195	32.325	57.385	29.515
WHL22.126978	19.48	17.895	42.16	21.215	17.33	21.81	21.285	43.195	28.33
WHL22.127355	4.985	6.19	0.335	37.285	89.255	46.48	78.79	60.855	92.97
WHL22.127400	1.465	1.66	1.455	2.89	4.6	7.77	9.535	8.505	8.945
WHL22.127418	0.925	3.135	206.38	18.16	17.39	22.06	34.635	29.765	35.675
WHL22.127430	2.53	1.92	2.91	5.95	11.27	13.615	14.16	12.97	13.715
WHL22.127442	56.84	52.135	40.985	38.815	42.51	42.99	37.71	40.025	39.835
WHL22.127461	1.095	0	0.73	0.43	0.76	0.535	0.4	0.435	0.4
WHL22.127558	0	2.92	0.11	0.24	0.14	1.12	1.28	2.735	1.16
WHL22.127689	12.605	9.67	15.73	5.01	2.255	1.58	2.14	2.025	1.72
WHL22.1278	0.515	0.52	5.88	1.23	10.115	38.585	96.71	51.815	90.34
WHL22.12780	21.96	20.555	7.73	1.42	3.72	13.68	11.655	4.77	5.945
WHL22.12802	1.035	0.55	6.27	21.84	10.795	28.83	49.195	33.76	36.315
WHL22.1281	0.03	0.035	0	0.05	0.04	0.06	0.8	0.525	3.385
WHL22.128157	2.045	5.055	14.225	0.84	1.875	1.06	1.085	1.155	2.06
WHL22.128160	18.045	15.645	15.12	3.18	5.04	4.96	5.33	9.62	6.91
WHL22.128205	0	0.15	0.335	1.28	1.14	1.42	1.735	1.63	1.745
WHL22.12823	45.13	34.315	16.235	12.615	9.695	9.945	10.6	7.925	8.34
WHL22.128264	170.81	150.805	178.66	140.99	177.945	221.285	237.055	216.965	190.68
WHL22.128298	2.16	3.1	0	0.025	0.12	0.02	0.31	0.175	0.375
WHL22.128311	1.785	1.995	1.68	51.745	30.74	35.12	21.11	18.695	22.455
WHL22.12836	82.655	85.525	64.33	34.335	27.8	32.465	39.76	47.125	32.145
WHL22.128376	0.49	0.48	0.055	0.05	1.18	8.965	19.965	10.47	12.25
WHL22.12838	1.64	4.2	3.08	3.445	9.745	16.21	12.435	8.75	13.93
WHL22.128401	1.04	1.22	0.445	0.625	1.16	1.885	1.91	1.475	1.635
WHL22.128424	34.1	8.635	40.925	151	389.645	622.17	734.34	776.735	1011.63
WHL22.12853	169.4	168.37	279.505	280.36	132.76	130.71	117.27	222.295	106.99
WHL22.128589	0	0.11	0.055	0.05	0.12	0.04	0	0.04	0.02
WHL22.128607	44.72	34.31	5.38	8.62	11.71	10.945	12.48	8.435	14.695
WHL22.128637	1.985	1.585	0.73	0.41	0.26	0.29	0.19	0.545	0.04
WHL22.128672	36.115	31.25	4.815	13.075	70.97	131.605	178.38	122.375	173.785
WHL22.128681	419.41	409.375	226.195	137.61	216.345	278.925	356.54	297.9	379.4
WHL22.128684	613.67	582.065	85.77	78.185	52.785	50.18	52.96	54.59	39.17
WHL22.128709	100.295	101.285	67.965	66.89	77.785	105.735	108.67	97.865	71.535
WHL22.12871	93.505	84.095	128.32	59.93	81.985	78.665	77.645	88.16	69.495
WHL22.128720	406.8	397.31	49.61	62.97	87.2	95.305	80.45	88.48	62.35
WHL22.128732	46.625	45.83	49.335	49.965	66.9	61.01	56.515	56.67	49.4
WHL22.128750	1.555	1.18	1.515	1.25	1.06	0.77	0.725	1.195	0.735
WHL22.128797	290.01	298.91	88.965	35.66	27.645	25.275	27.07	29.54	26.975
WHL22.128848	0.375	0.26	1.455	3.925	3.46	3.27	3.365	3.265	2.31
WHL22.1289	45.245	42.54	14.895	26.265	26.02	28.175	28.85	28.21	25.05
WHL22.128929	625.44	639.14	560.29	556.715	418.595	487.87	512.415	535.34	531.16
WHL22.128984	62.395	59.925	7.39	18.155	36.78	57.565	64.92	57.525	54.835
WHL22.129057	0.605	0.63	0.225	0.29	0.28	0.33	0.13	0.265	0.19
WHL22.129077	576.595	662.305	116.23	48.76	37.37	43.635	40.71	45.26	33.57
WHL22.129245	32.38	34.28	2.685	1.37	3.52	4.06	4.85	4.245	5.295
WHL22.129263	137.365	137.505	103.47	71.515	65.025	59.81	58.54	62.155	40.505
WHL22.129324	375.835	384	392.925	338	249.94	230.27	230.845	222.14	213.3
WHL22.129325	0	0	0.055	0	0	0.095	1.855	1.175	2.86
WHL22.12934	2.56	1.955	0.78	4.72	2.68	7.655	14.845	17.68	13.305
WHL22.129356	0.06	0	0	0.12	0	0.08	0.4	0.305	1.805
WHL22.12946	28.695	23.355	3.58	5.83	7.115	5.33	5.14	4.395	3.66
WHL22.129488	30.825	27.97	8.845	13.75	15.87	16.825	16.925	14.715	13.3
WHL22.12949	59.39	32.64	70.485	189.48	105.98	110.155	50.4	113.57	117.475
WHL22.12952	330.625	297.365	123.965	57.33	91.16	105.095	116.925	116.725	108.58
WHL22.129540	1.27	1.435	3.19	5.225	4.26	5.925	6.495	12.38	6.955
WHL22.12979	0	0.11	0.785	0.165	0.36	1.52	2.98	3.7	2.605
WHL22.129805	0	0	0.055	0	0.04	0.095	0.805	0.655	6.26
WHL22.129863	0.03	0	0.055	0.05	0.2	5.845	61.9	41.405	154.81
WHL22.12988	458.92	497.01	91.66	124.44	131.675	137.4	138.395	155.99	115.61
WHL22.129947	0.975	0.37	2.015	2.845	2.535	3.48	4.315	4.79	3.89
WHL22.129970	110.66	90.51	110.015	44.33	35.735	27.18	23.52	23.865	14.685
WHL22.130127	11.715	12.805	3.415	4.43	8.23	9.075	7.585	9.06	7.295
WHL22.130160	0.145	0	0.225	2.265	84.71	141.285	174.39	99.855	199.815
WHL22.130181	16.92	13.135	1.735	9.51	16.57	19.345	19.77	17.125	15.295
WHL22.130187	0	0	0	0	0.42	0.25	0.44	0.35	0.275
WHL22.1302	71.78	61.365	68.305	43.535	41.81	48.645	53.185	57.11	59.885
WHL22.13037	59.635	63.5	44.4	46.88	66.095	60.625	51.3	55.545	53.37
WHL22.1304	49.795	44.17	10.3	14.395	17.45	28	26.75	23.81	23.445
WHL22.130473	25.7	19.595	8.4	4.67	7.375	8.23	7.335	6.575	5.69
WHL22.130474	40.15	36.525	14.95	16.085	34.62	35.49	36.375	29.02	28.13
WHL22.130570	6.76	5.275	2.355	1.445	2.535	2.15	1.66	1.875	1.825
WHL22.13069	2.73	2.95	2.52	2.765	9.135	9.805	9.285	9.995	6.03
WHL22.130723	0.69	0.44	5.315	18.705	31.335	36.97	32.82	33.605	28.685
WHL22.13075	87.265	73.87	42.555	40.55	40.775	45.87	45.11	31.885	33.56
WHL22.130763	0.175	0.11	4.14	1.855	5.055	11.1	16.14	12.52	13.4
WHL22.130766	271.02	269.13	116.58	73.35	74.735	80.375	76.15	57.095	70.78
WHL22.130779	0.4	0.48	35.94	28.68	84.85	129.3	166.73	116.375	166.44
WHL22.130781	200.535	193.94	2833.88	3017.99	1449.44	1476.49	1384.38	1318.72	2092.57
WHL22.130787	0.145	0	0.11	0.72	0.3	0.425	1.915	4.2	11.03
WHL22.130796	16.665	15.715	7.165	6.575	10.455	14.605	17.905	13.305	16.915
WHL22.130805	10.935	11.18	2.915	0.335	0.08	0	0.02	0.415	0.04
WHL22.130821	0.32	0.035	0.11	0.1	0.08	0.06	0.06	0.2	0.085
WHL22.13089	0.515	0.255	0.11	0.075	0.1	0.06	0.13	0.09	0.02
WHL22.13090	18.185	19.46	0.055	0.46	0.02	3.32	3.095	0.02	0
WHL22.130939	0	0	0	0	0.02	0.155	0.075	0.505	0.23
WHL22.131057	0	0.295	2.015	5.975	8.52	10.175	13.335	9.97	15.11
WHL22.131060	4.315	3.175	21.78	26.1	44.235	63.935	81.365	55.815	73.895
WHL22.131186	196.565	252.78	137.79	53.77	51.945	69.805	65.87	75.475	64.655
WHL22.131192	1.87	2.25	11.985	11.895	19.605	20.58	19.815	22.71	13.86
WHL22.131218	1.73	0.96	0.39	0.24	0.6	0.425	0.55	0.785	0.585
WHL22.131237	99.925	96.38	14.84	30.825	49.155	62.11	62.165	59.095	46.12
WHL22.131239	0	0	1.235	0.265	0.44	0.56	0.67	1.09	0.5
WHL22.13135	8.72	9.52	30.235	111.68	96.555	106.725	144.855	119.965	153.185
WHL22.131363	0.06	0.44	0	0.36	2	3.265	10.985	8.355	17.88
WHL22.131501	0	0	0.17	0.05	0.46	3.81	9.63	3.875	8.57
WHL22.131510	0.06	0.035	5.77	7.685	10.595	9.29	5.525	5.98	4.855
WHL22.131526	18.36	17.23	0.67	0.195	0.3	0.135	0.245	0.175	0.105
WHL22.131608	1.385	2.875	327.09	131.565	89.85	72.57	66.885	70.335	87.655
WHL22.131620	0.085	0.075	0.11	0	0.18	0.135	0.135	0	0.085
WHL22.131638	44.84	46.56	399.535	316.085	164.18	129.025	99.63	107.205	62
WHL22.131652	11.975	8.08	2.24	2.985	3.28	2.23	2.675	3.485	2.205
WHL22.131957	0.145	0.075	2.635	4.31	12.57	11.48	14.865	16.3	15.145
WHL22.132135	1.005	2.03	0.335	0.095	0.44	0.17	0.285	0.26	0.25
WHL22.132138	0.06	0.48	3.305	0.195	0.22	1.015	1.68	9.71	20.685
WHL22.132187	56.93	67.63	100.545	172.335	218.22	265.595	270.3	294.325	224.54
WHL22.132192	0.03	0	0.22	0.07	0.06	0.19	0.115	0.175	0.105
WHL22.13221	0	0.035	0.11	0.41	0.46	1.135	1.875	1.42	3.445
WHL22.132210	17.41	16.415	309.56	216.715	120.8	108.98	98.105	108.145	118.97
WHL22.132211	33.645	35.16	42.105	34.215	30.7	33.66	32.44	30.085	26.55
WHL22.132295	12.23	12.36	40.145	42.955	38.09	42.385	40.98	38.38	37.095
WHL22.13233	1.815	2.84	0.11	0.12	0.32	0.325	0.265	0.415	0.23
WHL22.132347	186.2	187.74	49.775	34.845	35.14	33.72	30.13	32.915	25.61
WHL22.132359	0.06	0	0	0.07	0.26	0.425	0.765	0.61	0.335
WHL22.132608	161.515	170.505	80.46	118.35	85.425	104.55	98.62	88.535	107.985
WHL22.132809	22.505	23.39	21.78	11.92	6.255	6.25	8.14	9.62	9.895
WHL22.132817	149.74	149.585	54.365	14.11	10.815	10.1	10.015	11.235	7.35
WHL22.13285	299.6	308.055	241.555	162.34	127.975	115.185	103.395	116.76	78.235
WHL22.132878	132.675	131.76	86.895	48.715	42.815	50.275	52.365	48.7	54.085
WHL22.13294	95.03	87.56	14.95	30.245	45.61	60.195	60.755	58.45	59.025
WHL22.132987	0.12	0.995	0.565	0.17	0.32	0.15	0.095	2.44	0.82
WHL22.133057	6.075	3.99	1.85	8.26	9.035	11.445	17.845	31.525	17.795
WHL22.133157	5.925	7.525	3.415	6.55	10.875	16.465	19.965	21.035	17.355
WHL22.133181	0	0	0.055	0.1	0.06	0.27	2.175	1	5.485
WHL22.133421	44.955	42.285	8.51	7.875	13.65	13.73	13.01	12.23	10.295
WHL22.133476	0.29	0.035	0	0.1	0.06	0.08	0.04	0.085	0.02
WHL22.133565	0.2	0.335	0.055	0	0	0	0.02	0	0.02
WHL22.133583	0	0	0	0.05	0.16	1.25	4.28	2.44	3.635
WHL22.133593	0	0.035	0.165	0.075	0	0.04	0.04	0.915	0.06
WHL22.133665	162.98	169.8	147.815	60.97	27.025	31.295	32.04	34.005	28.01
WHL22.133681	1.035	0.775	0.895	0.745	0.28	0.19	0.15	0.265	0.145
WHL22.133774	0	0.11	0.445	0	0.38	0.44	0.265	0	0.4
WHL22.133790	146.255	128.03	10.19	15.725	17.25	21.39	28.58	37.295	50.465
WHL22.133963	6.705	7.6	14.895	14.665	13.11	13.235	13.085	8.88	11.225
WHL22.133999	1.035	1.515	239.015	94.32	41.31	43.275	61.865	41.65	80.94
WHL22.134005	141.485	130.39	58.225	33.735	34.1	32.965	31.065	31.005	24.585
WHL22.134200	0	0	0	0.265	0.24	0.385	0.27	0.325	0.15
WHL22.134516	33.645	39.04	23.905	16.4	30.1	48.195	57.695	59.645	65.18
WHL22.13463	0.52	0.515	0.39	0.29	0.36	0.345	0.82	0.935	1.155
WHL22.134696	0.745	2.065	0.615	0.335	0.42	0.31	0.23	0.805	0.465
WHL22.13472	0.835	1	41.035	87.36	151.275	156.87	158.09	121.075	127.685
WHL22.134728	10.275	14.57	63.385	23.33	32.16	42.045	43.315	44.6	37.085
WHL22.13474	4.55	2.88	0.785	1.905	1.44	1.04	0.785	1.2	0.25
WHL22.134748	211.675	200.615	64.72	20.13	8.16	9.945	12.8	13.59	10.195
WHL22.134762	130.86	137.18	215.285	145.92	90.06	71.64	63.14	73.055	51.92
WHL22.134764	3.6	14.965	7.34	11.93	8.96	5.28	3.19	5.445	3.84
WHL22.134822	2.075	2.1	33.705	3.76	3.86	5.655	7.7	11.845	9.73
WHL22.134836	99.55	103.275	49.105	22.395	24.105	23.235	19.43	21.875	15.525
WHL22.134837	80.9	83.125	107.165	86.565	79.11	83.62	88.44	74.55	68.745
WHL22.134847	67.835	61.95	17.975	36.045	47.51	56.7	60.065	52.095	65.235
WHL22.134892	50.48	47.01	38.295	15.245	3.8	2.155	3.44	4.965	3.78
WHL22.135434	0.605	61.93	34.935	60.15	32.76	11.19	0.385	0.565	6.33
WHL22.135615	91.265	95.565	26.815	7.635	7.135	6.25	6.02	26.84	10.32
WHL22.135677	3.51	5.015	44.175	153.35	363.62	304.855	305.015	363.66	386.765
WHL22.135679	236.66	223.445	86.33	132.92	109.31	125.235	129.495	131.64	130.995
WHL22.13574	0.145	0.295	0.445	0.58	1.14	2.1	1.895	3.745	1.41
WHL22.136019	0.06	0	0	1.735	1.18	2.35	3.575	3.31	3.215
WHL22.136064	0	0	0	0.05	0.02	0.04	0.17	3.51	3.34
WHL22.13625	0	0	0.055	0	0.36	0.385	0.34	5.77	0.8
WHL22.136291	0.72	0.515	0	0.12	0.12	0.02	0.04	0.09	0.02
WHL22.136296	0	0	0	0	0.02	1.27	8.695	3.785	26.85
WHL22.13636	26.735	94.935	105.375	14.375	15.95	6.695	6.075	7.185	5.9
WHL22.13640	15.4	9.78	7.615	3.945	3.18	1.635	1.875	3.655	1.325
WHL22.136498	6.13	4.76	4.31	3.47	2.015	2.055	1.68	1.96	2.545
WHL22.136538	18.39	17.415	27.88	33.28	60.995	64.72	49.675	60.07	34.07
WHL22.136718	59.605	61.84	52.58	19.215	29.82	36.465	47.705	53.335	43.055
WHL22.136730	128.475	123.025	12.315	2.72	4.4	9.25	9.345	9.275	6.765
WHL22.136737	244.395	211.065	151.385	90.32	104.59	95.67	112.435	119.06	141
WHL22.136781	0	0.075	0.895	0.195	0.1	0.155	1.795	1.96	13.865
WHL22.136791	8.26	7.49	5.715	16.54	12.99	19.025	18.705	25.95	17.345
WHL22.13682	0.03	0.035	0.165	0.19	0.4	0.6	0.935	0.83	0.82
WHL22.136888	13.295	13.325	7.84	1.615	1.935	1.945	3.785	2.285	4.665
WHL22.136937	17.47	16.05	4.645	2.53	3.4	4.365	5.425	5.185	5.525
WHL22.136942	162.49	151.725	93.34	64.63	76.77	84.8	90.6	118.785	77.005
WHL22.136948	5.465	4.87	8.57	30.725	75.51	68.09	70.745	49.06	43.955
WHL22.136963	83.205	76.97	17.02	8.405	13.97	16.175	17.905	19.07	15.645
WHL22.136975	4.55	4.1	3.195	1.855	0.86	0.905	1.41	1.5	3.84
WHL22.137017	0	0.035	0.055	0.845	2.135	2.325	3.725	2.135	3.91
WHL22.13708	0.03	0.075	7.22	90.465	128.9	84.295	78.92	52.51	69.22
WHL22.13711	165.02	174.495	22.845	64.895	80.93	106.365	110.045	62.48	54.895
WHL22.137309	2.305	3.025	1.905	4.24	3.34	3.08	2.615	2.915	2.75
WHL22.137327	0	0.075	0.055	0.335	0.16	0.37	0.385	0.785	0.44
WHL22.137331	375.255	335.035	61.87	24.175	20.17	32.62	55.92	55.465	84.38
WHL22.137347	298.325	338.835	231.175	201.64	119.12	100.685	89.985	97.085	80.575
WHL22.137352	124.215	120.11	52.685	36.045	49.25	58.565	63.37	59.665	55.185
WHL22.137391	0.115	0.26	0.22	0	0.4	0.485	0.535	2.505	0.55
WHL22.137808	0.03	0	0.505	0.29	7.035	11.485	17.96	8.75	25.595
WHL22.137836	1.24	0.815	0.395	0.12	0.18	0.115	0.15	0.215	0.21
WHL22.137954	0.03	0.035	2.3	1.325	0.12	0.805	4.68	3.485	18.085
WHL22.137967	670.425	680.575	658.335	404.775	255.675	241.05	227.29	217.085	160.305
WHL22.138002	82.77	68.22	26.43	24.22	29.02	42.41	62.165	58.775	69.045
WHL22.138288	30.535	29.48	20.385	9.85	2.195	1.69	3.17	3.79	6.595
WHL22.138300	0	0.255	0.955	0.385	0.9	0.615	0.84	0.655	4.14
WHL22.138327	91.72	91.025	82.08	45.37	8.055	14.255	21.15	14.96	23.59
WHL22.138491	0	0	0.11	0.145	0.12	0.04	0.075	0.155	0
WHL22.138614	32.11	36.53	20.95	3.85	5.66	1.865	3.78	3.41	2.6
WHL22.138654	4.52	4.615	3.245	0.77	0.28	0.325	0.325	0.525	0.36
WHL22.138660	0.695	1.77	3.305	0.53	1.24	0.58	0.765	0.675	1.175
WHL22.138666	23.11	21.625	19.705	17.605	25.885	24.275	26.27	30.885	25.29
WHL22.138671	212.825	161.235	46.52	20.61	28.48	31.145	32.59	48.055	29.39
WHL22.138683	86.51	92.545	36	14.855	25.31	21.54	22.14	23.75	17.725
WHL22.13878	0.03	0.11	0.45	0.025	0.08	0.04	0.075	0.15	0.06
WHL22.139065	102.57	112.465	534.15	345.345	243.365	172.97	121.07	165.825	99.955
WHL22.139068	5.01	8.265	879.825	965.79	453.005	426.375	398.51	472.905	474.72
WHL22.139213	171.61	163.125	304.13	345.175	463.28	388.005	348.935	379.655	175.925
WHL22.139221	54.97	52.685	109.415	124.15	148.105	141.97	134.995	114.805	116.39
WHL22.139230	0.03	0	0	0.07	0.02	0.08	0.17	2.61	0.23
WHL22.139325	0	0.035	3.415	1.445	0.1	0.02	0.04	0	0
WHL22.139556	525.23	575.19	230.28	147.825	121.2	100.415	97.185	122.17	89.7
WHL22.139582	6.305	5.945	6.83	4	4.04	3.215	1.89	3.7	1.64
WHL22.139825	13.67	13.21	2.575	2.095	4.54	7.365	12.745	22.205	22.355
WHL22.139858	3.685	2.99	3.245	3.925	3.1	1.71	1.435	1.915	1.22
WHL22.139860	3.485	1.77	2.295	1.3	1.38	0.505	0.65	1.545	0.585
WHL22.139878	0.03	0	0	0	0.08	0.115	0.075	1.83	0.21
WHL22.139911	2.445	2.47	0.84	0.55	0.48	0.52	0.515	4.46	0.695
WHL22.140308	207.555	200.87	20.045	26.055	27.625	28.33	31.885	41.605	28.095
WHL22.140407	304.11	307.435	97.76	79.2	45.55	44.16	44.745	57.4	63.845
WHL22.140436	134.285	133.42	125.475	44.665	34.695	32.35	25.735	24.645	19.79
WHL22.140451	40.98	32.835	3.355	0.745	2.075	2.54	3.21	3.045	4.68
WHL22.140635	43.2	44.98	45.235	30.145	16.79	10.745	9.595	13.955	7.055
WHL22.140641	0.29	0.515	0.11	0.075	0.04	0	0.04	0.04	0.04
WHL22.140863	38.42	40.92	258.445	541.94	244.905	232.645	256.58	241.21	267.29
WHL22.140865	14.88	13.395	2.41	2.89	6.435	7.095	6.23	4.79	5.34
WHL22.140866	128.185	127.63	169.825	155.58	54.1	61.24	52.065	49.885	60.795
WHL22.141361	2.13	1.585	0.17	0.025	0.08	0.255	0.4	0.04	0.755
WHL22.141450	92.01	87	10.19	13.82	32.98	40.585	52.25	52.985	52.905
WHL22.141618	36	30.81	13.885	5.465	0.54	0.69	0.725	2.98	1.28
WHL22.141621	358.08	377.575	826.21	1484.01	2339.64	1787.86	1221.51	1021.49	819.81
WHL22.141663	0.72	0.59	0.335	0.43	3.12	2.655	3.69	6.81	3.655
WHL22.141671	317.81	330.495	505.08	658.995	911.275	821.515	657.29	536.68	406.515
WHL22.1417	1410.2	1459.59	1030.44	666.225	866.73	1345.64	1834.23	1470.76	1986.61
WHL22.141935	206.065	189.945	25.25	29.325	25.14	22.33	20.785	22.82	15.15
WHL22.141945	64.785	68.375	48.99	13.655	8.755	9.1	8.85	9.52	6.49
WHL22.141951	2315.07	1725.62	1783.6	1839.01	4211.1	5129.41	5596.63	4543.08	5971.79
WHL22.142060	0.32	0.59	0.895	5.97	12.95	15.83	12.955	13.63	12.69
WHL22.142086	30.48	26.53	31.97	23.625	55.805	58.93	79.38	56.42	85.415
WHL22.142098	213.08	176.3	84.985	34.6	20.69	18.675	17.235	17.69	14.795
WHL22.142100	32.29	29.115	2.635	1.06	0.64	1.805	2.905	3.7	5.925
WHL22.142365	1.355	1.88	1.51	0.335	0.12	0.29	0.34	0.435	1.445
WHL22.1424	1.035	1.325	0.39	0.145	0.6	0.535	0.515	0.895	0.86
WHL22.142776	94.425	91.87	52.11	49.14	12.46	19.075	21.8	27.36	20.07
WHL22.143004	160.425	150.505	48.375	32.505	30.775	38.51	46.1	47.935	55.06
WHL22.143068	0	0	0	0.095	0.14	0.08	0.135	0.175	0.17
WHL22.143071	0.06	0.075	12.54	61.185	45.37	28.1	39.97	47.675	58.145
WHL22.143157	0	0	0.11	0.29	0.24	0.365	0.385	0.415	0.585
WHL22.143208	0.26	0.035	0.28	0.1	0.06	0.135	0.04	0.13	0.08
WHL22.143217	3.395	2.915	2.91	0.48	2.075	5.77	6.935	4.55	2.875
WHL22.143379	0.35	0.225	18.03	147.22	356.975	167.29	92.755	185.185	82.745
WHL22.143388	5.265	4.32	6.21	5.055	4.2	2.23	2.73	3.265	2.335
WHL22.143401	39.545	36.455	38.745	64.22	103.615	154.595	195.825	199.495	162.065
WHL22.143520	1205.32	1126.07	628.41	392.465	204.285	189.045	179.565	321.45	176.17
WHL22.143533	41.705	46.895	11.875	4.26	4.38	5.77	5.695	5.445	4.41
WHL22.143592	70.695	111.26	93.81	34.53	95.1	34.51	37.295	54.55	29.27
WHL22.143620	13.265	12.14	18.59	21.815	17.525	26.85	27.895	29.34	28.975
WHL22.143622	497	534.165	634.03	541.025	246.86	161.875	146.65	194.94	131.005
WHL22.143721	8.95	9.04	2.295	3.25	3.98	8.04	8.655	50.875	11.215
WHL22.143739	0.35	0.07	3.92	15.485	6.375	3.635	2.485	3.33	1.155
WHL22.143751	1.495	2.51	49.1	20.975	16.49	16.77	15.17	10.71	11.32
WHL22.143760	8.4	8.01	5.71	5.73	15.05	14.465	16.885	12.17	23.66
WHL22.143762	73.275	74.095	25.64	41.755	55.825	62.45	73.075	76.6	84.125
WHL22.143791	0.205	0.335	0.39	0.335	0.24	0.1	0.11	0.11	0.125
WHL22.143824	0.115	0.075	0	0.12	0	0	0	0	0
WHL22.143827	878.095	909.22	947.75	946.005	666.52	420.365	343.545	363.42	234.455
WHL22.143854	0.17	0.225	0.335	0.795	22.465	27.945	32.365	18.59	29.68
WHL22.143856	301.205	266.175	43.225	35.565	43.11	38.28	37.96	43.95	39.34
WHL22.143859	3.08	4.13	0.95	0.385	0.84	0.425	0.405	0.37	0.69
WHL22.143878	177.745	161.055	15.005	19.645	19.085	22.35	20.115	23.245	19.835
WHL22.143883	49.3	48.48	24.3	15.05	26.305	30.93	32.44	36.895	25.735
WHL22.143910	4.46	4.505	4.76	1.615	2.375	8.075	16.39	9.67	20.735
WHL22.143911	80.58	83.685	33.535	39.1	53.86	57.02	62.11	68.415	54.8
WHL22.143963	11.285	11.515	15.51	34.7	45.335	64.125	62.3	66.175	48.24
WHL22.143989	0	0	0.165	0.215	0.44	0.615	0.48	0.61	0.315
WHL22.144040	1.065	1.105	1.065	0.605	0.28	0.195	0.265	0.565	0.15
WHL22.144338	0.665	0.735	0.055	0.265	0.2	0.83	3.895	2.265	12.44
WHL22.144546	3.165	3.47	4.2	12.475	16.51	25.83	29.67	20.935	29.395
WHL22.144559	1.555	2.105	42.325	92.655	42.875	37.64	41.955	34.11	51.685
WHL22.144791	52.205	49.77	39.355	48.325	31.175	50.505	43.345	37.5	42.305
WHL22.144836	517.8	511.575	572.595	389.31	337.065	275.375	209.18	183.32	151.12
WHL22.144864	0.175	0.22	3.02	13.87	25.585	40.175	32.02	22.275	18.635
WHL22.14504	0.145	0.11	0	0	0.12	0	0.02	0.04	0
WHL22.145103	0.085	1.55	82.81	27.74	30.905	104.315	207.885	121.015	255.885
WHL22.145147	0.865	0.85	0.45	0.05	0.58	0.12	0.04	0.215	0.04
WHL22.145150	18.65	18.08	11.365	16.855	30.495	19.63	12.535	16.7	9.56
WHL22.145161	129.225	134.235	23.63	17.48	18.745	22.41	30.97	24.145	33.715
WHL22.145164	1.73	1.185	0.675	7.755	6.075	4.77	12.19	21.9	13.635
WHL22.145176	1.355	2.325	2.515	0.915	1.22	0.67	0.685	1.35	0.84
WHL22.145204	8.52	8.115	4.42	5.32	6.375	7.845	6.17	6.765	4.77
WHL22.145282	2.07	2.91	1.01	0.385	0.52	2.555	5.635	4.245	14.33
WHL22.145405	191.125	145.265	11.425	34.24	33.52	50.045	66.87	50.39	81.16
WHL22.145482	0.03	0.33	22.06	4.36	2.275	1.135	0.515	1.565	0.38
WHL22.145534	1.585	1.365	0.95	0.025	0.04	0	0	0.065	0.02
WHL22.145655	0	0	0	0	0	0	0.02	0	0.08
WHL22.145766	0.2	0.185	0.28	0.145	0.16	0.02	0	0.135	0.105
WHL22.145770	2.65	2.105	1.345	0.555	0.62	0.575	0.34	1.07	0.485
WHL22.145776	82.195	72.91	7.165	0.965	1.815	3.325	8.1	7.38	16.495
WHL22.145794	0.465	0.44	0.055	0.075	0.08	0.12	0.15	0.045	0.19
WHL22.145812	1.065	1.4	36.625	52.59	65.9	69.74	64.9	58.855	71.04
WHL22.145815	4.345	4.98	74.905	57.96	61.14	59.445	45.72	41.97	42.075
WHL22.145893	0.835	0.59	3.135	47.125	174.62	171.14	223.475	396.62	220.385
WHL22.145902	13.44	14.135	7.055	27.045	54.08	105.4	183.465	132.705	245.105
WHL22.145918	21.065	23.175	29.005	20.47	18.25	22.175	22.355	26.265	18.99
WHL22.14594	41.93	38.56	1.285	3.925	9.815	13.255	11.635	14.665	8.825
WHL22.146017	4.75	4.87	6.16	4.41	13.25	31.85	54.14	34.44	67.925
WHL22.146031	45.325	53.39	90.025	61.085	82.69	119.415	124.85	133.18	108.68
WHL22.146047	79.83	79	14.165	14.42	12.79	10.965	8.77	9.21	5.655
WHL22.146049	35.805	34.205	5.66	6.545	6.655	5.845	6.135	6.77	4.665
WHL22.146052	189.395	172.455	20.045	21.165	25.705	22.31	22.49	22.895	21.825
WHL22.146088	4.95	4.91	22.28	18.135	12.53	14.19	12.205	14.125	9.705
WHL22.146120	12.55	11.18	13.995	9.585	13.77	31.64	34.12	21.045	29.625
WHL22.146261	8.515	8.635	9.125	9.13	18.165	27.195	33.07	34.09	39.625
WHL22.146263	21.5	21.365	6.61	7.13	9.535	7.96	6.895	5.66	5.88
WHL22.146273	0.26	0.405	0.17	0.14	0.1	0.115	0.245	0.155	0.15
WHL22.146279	106.225	106.45	58.46	17.675	6.995	6.325	8.16	7.99	6.975
WHL22.146303	2.82	3.32	6.05	2.94	9.135	13.155	16.145	18.585	13.42
WHL22.146308	0.805	0.74	0.56	0.89	1.515	3.25	7.01	5.615	11.935
WHL22.146315	78.395	76.185	59.685	28.05	21.33	18.735	20.92	22.47	17.37
WHL22.146452	0.03	0.515	3.75	3.855	6.795	13.635	37.73	24.535	65.265
WHL22.146455	0	0	0.165	1.54	2.515	1.695	0.71	2.2	0.315
WHL22.146602	192.62	196.99	37.85	54.805	90.965	102.21	108.42	133.575	109.105
WHL22.146726	25.815	27.265	6.775	8.09	24.76	33.675	35.88	32.06	32.345
WHL22.146777	2.015	2.95	0.055	0.145	0.34	0.17	0.23	0.15	0.38
WHL22.146977	2.04	1.44	1.96	2.455	3.22	2.54	2.715	2.485	2.515
WHL22.146990	6.275	3.175	1.175	0.985	1.46	1.425	1.7	3.355	1.825
WHL22.147005	2.795	1.585	2.07	1.01	0.52	0.35	0.34	0.61	0.44
WHL22.147081	6.445	7.195	1.68	1.83	4.935	5.775	9.015	4.965	4.015
WHL22.147193	2.59	2.435	2.46	1.105	0.18	0.17	0.27	0.22	0.145
WHL22.147203	0.895	0.7	0.335	1.375	9.415	16.865	18.915	13.015	18.785
WHL22.147236	229.925	198.185	249.54	371.9	421.845	419.705	377.8	351.99	366.305
WHL22.147275	49.615	49.405	16.515	5.37	8.995	13.06	15.15	14.105	11.025
WHL22.147314	71.43	66.94	37.29	10.475	20.91	26.235	28.905	20.94	24.52
WHL22.147317	3.655	2.36	0.785	0.19	0.26	0.215	0.305	0.37	0.255
WHL22.147365	574.705	718.51	386.66	211.03	147.305	214.7	248.42	259.525	254.365
WHL22.147372	0.26	22.51	0.22	0.17	10.47	14.79	7.145	12.39	24.92
WHL22.147375	0.03	2.06	0	0	2.65	2.52	1.125	2.885	3.825
WHL22.147393	1.295	95.09	148.175	0.315	4.74	77.39	51.835	32.935	153.085
WHL22.147403	120.67	124.05	215.06	298.85	273.75	275.305	263.27	280.535	237.19
WHL22.147405	3.945	4.465	10.745	20.71	20.03	29.275	27.07	23.29	24.94
WHL22.147447	95.32	108.33	96.13	51.605	47.525	51.815	66.03	72.275	87.915
WHL22.147471	0.115	0.22	0.22	0.385	5.595	11.75	15.515	9.185	9.92
WHL22.147492	11.285	13.765	13.1	16.495	40.055	44.355	39.3	54.17	42.57
WHL22.147493	1.32	1.325	8.68	13.725	23.645	23.85	22.525	25.6	14.165
WHL22.147545	10.94	9.48	29.73	41.445	99.095	149.715	180.2	144.86	188.87
WHL22.147711	41.04	33.245	30.51	37.125	43.455	60.675	70.02	63.525	64.98
WHL22.147719	6.965	8.195	111.64	74.38	59.24	58.715	58.12	64.345	67.87
WHL22.147738	29.76	30.775	37.46	28.97	29.44	27.83	25.18	31.16	18.6
WHL22.147840	1.785	2.285	7.67	4.89	9.255	16.58	29.135	17.44	43.41
WHL22.147847	7.765	2.47	5.83	2.39	0.04	0	10.09	3.135	2.78
WHL22.147866	2.155	1.145	0.28	0.29	0.26	0.385	0.27	0.655	0.17
WHL22.147912	1.27	1.515	0.335	0.845	2.675	3.58	4.72	5.705	4.27
WHL22.147938	4.26	3.175	0.84	1.11	0.44	0.4	0.21	1.375	0.605
WHL22.147956	0	0.295	338.735	373.925	299.87	249.745	233.18	249.245	228.465
WHL22.147969	0.03	0.11	0.11	0.025	0.08	0.02	0	0.02	0.02
WHL22.147973	114.395	116.635	39.925	10.74	9.395	8.555	8.445	8.79	7.185
WHL22.148009	0.665	0.37	0.28	0.05	0.02	0	0.06	0.045	0
WHL22.148069	33.295	33.135	16.235	15.36	16.23	19.33	21.51	22.405	21.17
WHL22.148161	16.03	17.675	16.35	12.64	14.115	15.85	17.6	13.32	17.495
WHL22.148162	80.065	81.65	115.055	100.625	65.615	58.085	54.68	58.74	42.33
WHL22.148199	0	0.11	0.055	0.36	0.04	0.06	0.265	1.5	4.77
WHL22.148246	59	64.61	39.755	41.42	37.16	38.695	41.86	40.47	28.165
WHL22.148247	64.5	71.1	40.705	23.165	30.1	30.64	31.925	36.505	26.64
WHL22.148299	4.115	3.355	2.24	1.13	0.68	0.905	0.705	0.94	0.585
WHL22.148320	0	0	0.055	2.165	6.835	5.71	4.74	4.265	1.81
WHL22.14834	26.015	22.47	6.045	8.765	12.39	14.695	13.05	10.425	13.295
WHL22.14836	86.37	79.805	23.52	6.67	10.975	10.195	10.735	11.885	10.84
WHL22.148519	0	0	0	0.095	0.54	1.845	3.095	1.46	2.88
WHL22.14855	2.91	2.915	0.11	0.14	0.38	0.425	0.27	0.635	0.44
WHL22.148654	0.03	0	0.055	0.29	0.64	0.965	1.97	2.44	3.085
WHL22.148946	865.05	828.55	1049.07	980.445	962.645	915.16	954.31	905.505	809.855
WHL22.14902	3.54	2.88	1.79	2.405	2.695	2.035	1.205	1.87	3.34
WHL22.14903	72.35	72.8	91.54	72.43	65.865	62.545	56.65	54.82	35.48
WHL22.149141	62.365	58.11	63.55	32.77	29.96	30.5	29.475	29.26	20.3
WHL22.149181	0	0	0	0	0	0	0	0.065	0.13
WHL22.149268	0	0.035	0	1.06	0.18	0.25	0.785	3.745	4.245
WHL22.149371	0.03	0.075	0.395	0.46	0.66	8.74	0.515	2.645	0.335
WHL22.149379	1.415	1.185	1.175	2.05	0.68	2.095	4.7	19.09	8.49
WHL22.149389	24.23	24.39	7.67	16.52	20.83	37.425	47.095	72.98	45.335
WHL22.149403	319.305	340.86	296.86	273.66	170.8	180.18	179.895	188.305	115.225
WHL22.149409	7.22	7.045	82.87	42.645	33.06	27.715	26.155	25.01	21.635
WHL22.149463	75.89	70.4	112.595	79.655	47.05	38.24	35.075	42.445	19.07
WHL22.149482	197.195	201.79	201.72	108.62	107.07	86.535	74.315	117.775	63.405
WHL22.149487	12.375	13.87	25.98	13.605	8.87	5.73	4.36	3.16	3.085
WHL22.149489	625.125	618.07	41.77	40.36	66	78.585	81.595	86.485	75.72
WHL22.149509	0.465	0.705	0.11	0	0.02	0	0.06	0.04	0
WHL22.14951	64.895	61.845	37.85	29.305	46.49	33.025	27.015	29.23	22.73
WHL22.149578	167.93	162.64	31.63	46.04	57.085	65.145	65.03	68.45	53.065
WHL22.149584	1277.32	1306.71	653.945	128.31	161.97	140.65	111.285	181.66	74.595
WHL22.149647	0.03	0.22	2.185	7.245	10.395	12.815	13.53	12.125	15.915
WHL22.149720	20.46	21.84	6.775	6.745	9.715	12.675	15.32	14.35	13.28
WHL22.1498	1.525	1.66	0.395	0.555	0.32	0.325	0.365	0.325	0.255
WHL22.14988	4.465	4.43	9.18	14.715	20.57	26.35	29.595	42.02	33.13
WHL22.149935	2.19	1.255	1.4	0.215	0.22	0.135	0.17	0.305	0.185
WHL22.150037	0.09	0.255	0	0	0.06	0	0	0	0.04
WHL22.150097	4.92	5.94	2.91	0.435	0.08	0.08	0.15	0.13	0.125
WHL22.150127	3.34	3.21	1.955	0.215	0.22	0.08	0.08	0.435	0.105
WHL22.150131	586.93	570.85	691.29	403.975	334.46	322.975	357.265	495.77	396.105
WHL22.150172	39.11	49.515	15.735	7.035	8.48	12.905	13.275	12.52	15.045
WHL22.150199	0.06	0.11	0.335	0.05	29.46	0.25	0.345	0.305	0.23
WHL22.150227	0.52	0.22	11.14	16.58	27.865	26.105	41.365	33.135	21.02
WHL22.150230	214.095	210.83	123.905	75.415	66.42	84.05	91.165	97.405	76.69
WHL22.150232	115.12	107.77	5.43	4.865	10.895	19.215	21.38	17.135	17.63
WHL22.150242	71.055	81.805	122.84	120.68	91.42	92.565	85.685	86.805	82.855
WHL22.150251	0.145	0.33	4.03	5.49	9.235	13.985	18.395	55.06	17.185
WHL22.150302	2.36	2.29	0.56	0.12	0.36	0.46	0.495	0.655	0.42
WHL22.150420	10.33	8.23	0.34	1.325	1.66	1.25	1.53	1.745	1.66
WHL22.15048	2.445	2.14	12.32	23.12	28.4	29.215	28.58	30.17	18.325
WHL22.150496	8.575	7.415	4.085	4.45	8.555	13.65	21.915	11.315	34.5
WHL22.150512	10.68	10.48	36.785	25.355	17.905	16.35	13.735	14.89	12.625
WHL22.150808	6.53	5.795	5.545	2.02	1.16	0.6	0.15	0.41	0.04
WHL22.150852	165.655	173.93	67.915	47.315	55.02	54.89	49.005	57.155	40.405
WHL22.150919	127.29	124.16	101.395	18.66	11.315	18.44	17.195	18.595	14.91
WHL22.150931	160.96	152.545	260.06	202.435	128.84	122.535	116.405	123.595	134.34
WHL22.150955	0	0.035	0	0	0.02	0	0.88	0.455	13.44
WHL22.151009	209.685	217.955	67.355	109.73	70.735	75.28	78.6	86.545	73.765
WHL22.151079	0.72	0.55	0.395	0.075	0.3	0.23	0.305	0.24	0.585
WHL22.151151	0.085	0.035	2.35	8.93	9.655	10.655	10.565	10.95	11.32
WHL22.151281	0.375	0	0.165	0.025	0.12	0.155	0.17	0.37	0.19
WHL22.151308	619.89	560.59	630.825	244.43	251.715	331.04	313	327.265	252.57
WHL22.151560	0	0	0	0	0.26	2.6	0.975	3.46	1.135
WHL22.151614	4.375	4.505	32.53	38.115	34.475	33.85	33.24	31.505	25.22
WHL22.151633	1.125	1.18	0.62	1.83	10.415	27.545	49.635	28.255	67.165
WHL22.15187	62.71	48.26	25.76	18.37	13.175	14.1	14.905	17.715	14.345
WHL22.152063	0.49	1.07	0.615	15.77	75.97	154.325	132.875	84.705	150.05
WHL22.152284	0.06	0.035	0.11	0	0	1.345	6.17	4.745	11.77
WHL22.15236	32.44	1.105	2.295	6.855	3.31	11.935	0.115	5.04	1.695
WHL22.15245	0.12	0	0.505	6.215	12.03	6.635	4.18	81.095	4.98
WHL22.15250	140.275	129.66	10.525	9.39	15.19	19.475	34.73	33.31	37.2
WHL22.15257	1.01	1.035	0.22	2.915	11.95	16.35	21.245	17.57	33.16
WHL22.152594	4.805	3.985	0.445	0.94	2.555	4.04	6.555	11.775	15.3
WHL22.152622	186.005	157.515	48.88	37.785	39.83	32.54	22.965	23.085	17.38
WHL22.152875	73.73	74.865	134.825	329.455	405.38	344.705	270.945	236.015	190.515
WHL22.152885	0	0	0	0.1	0.16	0.19	0.365	0.24	1.345
WHL22.153028	41.21	34.655	17.97	7.15	6.075	7.42	14.805	9.165	13.075
WHL22.153031	14.795	6.53	26.32	41.95	7.255	7.16	9.115	52.55	10.61
WHL22.153041	0	0.11	17.575	30.675	22.025	26.295	32.365	30.355	40.275
WHL22.153386	137.135	142.175	142.84	117.17	153.085	153.73	170.395	183.79	201.32
WHL22.153693	16.87	17.05	3.805	4.885	5.595	9.04	11.04	20.845	15.14
WHL22.153705	147.635	158.95	145.23	80.495	6.975	0.825	0.515	5.05	0.59
WHL22.153735	2.015	2.985	48.88	15.99	13.51	11.16	9.97	11.28	9.745
WHL22.153742	376.095	376.28	328.21	252.805	560.36	1418.18	2286.09	1863.92	3263.16
WHL22.153756	17.24	18.815	1.625	2.07	2.635	2.575	2.29	2.96	2.795
WHL22.153757	194.725	207.33	105.265	36.315	36.075	40.41	34.66	54.535	41.545
WHL22.153936	2.1	0.48	0.28	0.215	0.3	0.845	0.88	0.895	1.74
WHL22.154126	0.09	0.11	0.055	0.12	0.18	0.21	0.19	0.26	0.19
WHL22.154262	23.2	23.06	9.125	5.105	8.55	6.29	6.21	5.555	4.415
WHL22.154302	134.32	134.09	120.495	69.785	72.715	84.05	86.565	69.46	71.285
WHL22.154311	60.815	57.485	31.805	9.705	19.19	26.69	27.515	27.735	27.21
WHL22.15432	0	0	0.055	2.84	13.83	12.985	13.62	13.325	5.825
WHL22.154338	1.005	0.595	0.45	0.335	0.3	0.175	0.13	0.545	0.105
WHL22.154446	0.835	0.74	1.175	0.94	0.56	0.485	0.305	0.52	0.38
WHL22.154464	183.73	154.085	16.345	27.93	19.345	18.75	21.285	17.29	16.68
WHL22.154524	358.505	331.455	495.065	352.98	480.91	309.255	222.69	260.305	152.855
WHL22.154567	0	0	0	0.17	0.32	0.81	0.665	0.825	0.545
WHL22.154813	57.1	59.995	13.94	18.855	19.53	21.045	22.925	27.21	31.665
WHL22.154960	11.34	10.33	14	9.585	16.09	23.135	28.045	24.11	28.84
WHL22.154966	0.175	0.26	0	0.095	0	0.02	0	0	0.15
WHL22.155316	0	0.035	0	0	0.06	0.17	1.355	2.025	3.34
WHL22.155335	0.145	0.185	0	0.22	0.32	0.365	0.325	0.085	0.08
WHL22.155350	0	0	0.395	0.025	0.02	0	0.135	0.02	0.19
WHL22.155370	0.09	0.515	28.385	13.505	1.535	1.075	1.145	3.175	1.465
WHL22.155374	85.475	80.475	9.91	14.95	26.365	29.64	29.84	29.85	35.015
WHL22.155770	35.775	34.32	33.71	18.52	3.36	0.96	0.86	2.395	0.82
WHL22.155773	37.065	37.485	35.27	19.43	4.68	1.655	1.93	3.24	1.45
WHL22.155787	24.4	22.84	10.47	24.445	6.175	8.095	13.465	50	29.025
WHL22.155817	0.085	0.145	0.895	0.725	0.38	0.175	0.19	0.37	0.4
WHL22.155866	0.115	0.11	0.11	0.215	0.84	2.215	2.54	3.55	3.74
WHL22.155902	0.69	0.52	1.005	1.035	2.495	1.845	2.885	1.955	2.12
WHL22.15612	7.335	9.505	0	0.17	0.1	0.58	0.06	0.045	44.395
WHL22.156125	140.3	137.04	74.58	39.13	42.61	38.195	41.08	47.63	39.185
WHL22.156127	2.59	1.215	5.545	18.08	68.135	90.34	115.565	143.945	155.275
WHL22.15613	2.075	2.14	9.685	12.905	21.225	25.68	25.465	16.22	21.43
WHL22.156161	0.2	0	0	0	0	0.02	0.02	0.04	0.04
WHL22.156558	81.505	78.105	31.745	26.97	32.525	36.045	38.495	30.905	31.845
WHL22.156559	0.285	0.295	0.395	0.19	0.14	0.15	0.075	0.11	0.02
WHL22.156591	4.75	4.76	4.03	0.51	0.34	0.27	0.21	0.46	0.185
WHL22.156714	84.205	76.965	46.13	41.395	29.82	29.12	27.725	34.485	28.865
WHL22.156977	0.345	0.665	10.695	7.01	19.425	26.79	28.735	21.085	18.88
WHL22.157150	0	0.075	3.75	0.19	0	0.095	0.21	1.78	0.525
WHL22.157153	3.565	3.395	0.11	0.36	0.86	0.635	0.19	0.37	0.23
WHL22.157208	8.92	8.855	18.7	17.53	22.145	23.25	21.245	21.775	15.55
WHL22.157255	4.145	4.13	4.475	4.07	5.875	7.905	8.365	10.995	10.42
WHL22.157421	2.705	2.51	0.615	0.29	0.4	0.33	0.285	0.285	0.315
WHL22.157424	78.485	77.705	45.57	19.89	17.49	18.215	14.69	14.785	12.81
WHL22.157457	44.64	41.325	12.26	16.065	15.315	13.38	13.125	14.995	7.835
WHL22.157483	39.715	33.835	10.415	9.365	9.535	9.635	9.515	6.99	6.995
WHL22.157484	68.325	80.395	144.285	83.34	107.57	133.195	148.08	126.735	96.095
WHL22.157602	0.03	0	0	0	0.04	0.365	2.805	2.025	23.66
WHL22.157722	9.93	9.335	10.47	17.72	21.725	24.35	24.74	22.405	17.065
WHL22.157791	92.585	90.95	50.67	40.185	47.425	43.25	37.62	37.545	35.305
WHL22.157821	54.74	26.75	29.605	28.145	26.38	45.93	55.9	34.72	28.7
WHL22.157835	0.145	0.07	4.82	8.91	11.45	10.77	11.555	13.695	12.14
WHL22.157856	0.03	0.26	0.28	0.075	0.16	0.195	0.02	0.11	0.085
WHL22.157863	1.035	0.885	1.565	11.1	17.47	22.735	23.325	22.075	21.975
WHL22.158312	0.03	0.035	20.55	24.755	33.44	25.52	10.49	14.255	9.14
WHL22.158340	0.805	1.07	0.73	0.075	0.26	0.385	0.06	0.26	0.295
WHL22.158406	440.785	452.105	176.755	149.58	103.235	114.305	118.205	138.335	114.075
WHL22.158418	0.86	1.33	0.505	0.095	0	0	0	0.045	0
WHL22.158545	57.39	55.9	86.955	70.43	40.615	46.835	45.355	36.685	36.245
WHL22.158552	24.145	26.42	22.395	11.99	5.835	4.695	4.605	8.015	3.55
WHL22.158566	73.995	60.55	73.57	46.785	33.64	25.885	28.355	34.715	30.27
WHL22.158600	0.2	0.185	0	0	0.02	0	0.04	0	0
WHL22.158627	15.02	11.695	1.905	1.635	1.38	0.885	0.935	0.915	0.67
WHL22.158686	2.935	4.39	110.465	181	162.46	148.635	150.28	176.795	109.735
WHL22.158697	240.45	227.47	37.675	13.125	18.33	20.565	19.885	19.725	14.07
WHL22.158782	237.575	223.455	768.055	821.27	276.535	233.72	218.045	237.37	251.89
WHL22.158789	5.38	6.64	779.375	1097.48	243.945	217.665	201.5	255.67	231.51
WHL22.158817	0.26	1.805	2.465	0.34	0.26	0.04	0.17	0.175	0.125
WHL22.158820	76.295	74.195	84.155	45.725	44.455	40.155	39.34	43.975	36.53
WHL22.158834	184.765	200.68	66.125	125.715	134.745	151.21	154.67	110.99	150.525
WHL22.158867	16.46	15.165	12.765	41.32	45.57	50.315	54.775	41.34	51.135
WHL22.158882	179.47	177.735	66.125	89.5	100.62	110.205	117.975	140.605	131.045
WHL22.158895	0	0	0.165	0.335	0.1	0.095	0.135	1.11	0.315
WHL22.159051	77.655	130.375	1.905	4.02	3.835	28.495	31.485	43.96	133.96
WHL22.159299	277.93	295.295	130.955	100.645	110.265	126.46	113.12	128.215	112.725
WHL22.159305	1.44	1.18	2.46	0.145	0.72	0.17	0.305	0.22	0.38
WHL22.159327	32.15	37.23	216.345	180.11	109.645	101.595	102.44	100.305	109.905
WHL22.159332	392.96	408.73	255.93	109.44	134.04	130.115	127.11	125.835	116.035
WHL22.159452	282.735	260.245	35.72	25.86	31.205	34.83	34.29	35.905	30.885
WHL22.159495	50.65	48.37	14.33	9.92	11.93	12.66	12.875	11.86	12.37
WHL22.15960	0.665	0.74	1.01	1.785	0.96	0.825	2.16	10.93	5.13
WHL22.159680	557.985	590.62	92.32	46.88	40.815	47.83	61.935	64.55	93.28
WHL22.159684	0.345	1.11	18.085	16.905	8.1	7.12	7.185	8.26	6.075
WHL22.159695	1.355	1.295	21.105	51.34	50.25	56.58	55.655	54.35	47.15
WHL22.159701	0.29	0.295	0.11	0.335	0.34	0.23	0.4	0.39	0.125
WHL22.159708	1491.74	1354.13	521.21	641.425	865.73	984.145	1094.03	1344.62	627.605
WHL22.159717	4.575	3.91	1.23	1.25	1.64	2.115	2.75	4.22	4.115
WHL22.159720	0.145	0.07	0.56	0.075	0.12	0.25	0.135	0.085	0.105
WHL22.159801	0	0.11	0	0	0.7	29.6	25.83	11.675	14.89
WHL22.159861	93.795	102.8	37.51	10.74	16.35	23.545	23.67	32.975	31.05
WHL22.159904	638.68	622.1	393.05	93.02	113.03	105.395	101.945	157.265	82.245
WHL22.159939	0.145	0.33	0.165	0.025	0.06	0.1	0.15	0.085	0.105
WHL22.159978	0	0	0	1.01	0.06	0.06	0	1.05	0.105
WHL22.16001	219.99	184.675	54.81	55.455	58.4	66.47	56.38	45.51	44.775
WHL22.160026	0.17	0.26	80.675	165.04	159.815	152.865	145.16	207.17	107.745
WHL22.160048	0.345	0.22	1.065	0.845	1	1	0.955	1.325	0.775
WHL22.160152	622.51	638.11	160.18	89.645	223.605	410.655	537.67	485.2	503.46
WHL22.160155	2.965	6.165	4.535	0.095	0.34	0.345	0.15	0.305	0.275
WHL22.160164	498.61	474.395	270.315	39.685	46.21	46.81	47.075	55.18	50.82
WHL22.160352	36.55	39.515	8.455	10.98	8.93	10.055	7.965	10.17	7.125
WHL22.160374	14.215	14.02	58.34	55.525	87.74	87.935	85.075	89.37	96.555
WHL22.160395	0.635	1.62	16.065	18.25	49.19	55.87	59.36	43.145	94.98
WHL22.160435	0.085	0.145	28.495	24.225	58.58	56.91	64.19	43.865	90.56
WHL22.160761	5800.7	5618.41	251.885	112.31	9.115	5.79	4.99	47.37	4.345
WHL22.16080	0.865	1	31.58	106.62	112.69	129.42	143.425	99.635	78.795
WHL22.16099	20.405	22.14	19.375	6.575	5.495	6.02	8.655	5.68	9.73
WHL22.161068	141.54	88.965	88.065	110.57	169.625	256.955	339.345	337.895	444.93
WHL22.161070	0.145	0.37	11.76	34.7	34.56	62.125	52.135	56.47	71.92
WHL22.161076	0	0.515	23.46	3.685	2.835	7.1	11.135	5.415	9.775
WHL22.16108	0.4	1.475	24.635	152.375	130.58	114.955	109.3	183.53	119.06
WHL22.16112	53.76	58.035	69.645	54.155	43.355	45.565	35.15	38.05	24.875
WHL22.161143	23.285	23.025	1.85	2.315	4	4.035	5.065	4.9	3.385
WHL22.161146	0	0	0	0.075	0.12	0.25	0.15	0.13	0.145
WHL22.161152	25.01	23.1	17.19	33.665	32.86	35.76	37.12	27.645	34.52
WHL22.161160	24.405	24.72	16.74	7.32	18.785	22.2	21.59	14.175	13.255
WHL22.161518	1.755	1.07	1.12	1.565	1.32	1.135	1.225	1.63	1.175
WHL22.16156	0	0	0	0	0	0	0.23	0.415	9.55
WHL22.161582	0	0	0.28	0	0	0	0	0	0
WHL22.161583	22.385	24.725	2.855	0.265	0	0.04	0.02	0.11	0
WHL22.161618	207.04	187.18	173.795	117.82	67.735	62.72	61.67	54.355	56.82
WHL22.161627	1.585	0.885	0	0.05	0.08	0.115	0.06	0.04	0.125
WHL22.16165	0.95	1.035	9.235	7.635	4.4	4.73	4.28	4.77	7.225
WHL22.161798	157.135	159.91	51.345	46.23	46.49	44.315	43.065	55.235	41.38
WHL22.161803	19.31	20.81	33.87	37.3	47.665	35.74	39.93	38.78	38.11
WHL22.16181	8.635	9.075	9.795	7.585	8.46	9.65	13.58	14.06	17.395
WHL22.161842	202.29	198.07	45.125	20.83	13.91	12.075	10.315	11.365	8.885
WHL22.161857	81.27	79.665	34.21	19.885	40.535	58.26	64.555	62.15	62.02
WHL22.161858	123.065	136.145	58.45	69.395	106.255	132.805	135.395	136.905	110.22
WHL22.16190	9.47	7.01	9.46	27.52	25.805	29.715	30.76	26.8	41.22
WHL22.161919	1.93	2.435	9.685	5.925	8.515	10.35	13.165	10.715	14.495
WHL22.16192	4.75	4.87	6.945	12.715	13.21	19.04	25.525	27.73	39.64
WHL22.162145	68.295	63.68	39.19	11.22	7.755	16.27	21.61	20.355	29.975
WHL22.162206	0	0	0	0.025	0	0.02	0.02	0.39	0.02
WHL22.162209	0	0	0	0.165	0.06	0.06	0.11	1.18	0.06
WHL22.162377	0.145	0.37	30.625	24.25	18.43	13.6	12.8	18.195	22.415
WHL22.162393	16.29	17.38	53.025	66.215	94.225	74.39	61.285	59.095	55.975
WHL22.162414	0.145	0.665	0.505	0.335	0.74	0.42	0.4	0.285	0.505
WHL22.162582	0.06	0.11	0.67	2.24	1.38	3.1	16.22	36.86	89.69
WHL22.162585	28.2	117.93	138.63	15.7	41.13	16.29	16.105	14.215	17.79
WHL22.162592	69.3	62.545	4.7	2.815	1.42	1.805	2.54	6.03	4.265
WHL22.162621	0.695	0.48	0	0.025	0.06	0.04	0.06	0.065	0
WHL22.162662	6.33	6.38	5.825	2.505	3.26	4.055	6.955	8.27	9.35
WHL22.162699	74.07	81.49	45.87	4.31	0.32	0.485	0.115	1.785	0.04
WHL22.162721	1.18	1.18	0	0	0	0	0	0.02	0
WHL22.162931	31.025	31.18	11.59	15.485	25.2	34.195	33.89	30.085	33.03
WHL22.162932	47.23	48.595	25.365	15.435	17.51	18.83	18.84	14.28	15.525
WHL22.162939	0.03	0.035	4.985	48.115	56.705	40.18	50.55	50.26	51.08
WHL22.162976	553.755	538.335	496.24	389.38	171.425	117.835	99.975	130.095	55.825
WHL22.16305	21.24	23.73	3.36	13.34	16.07	23.98	28.01	24.68	26.885
WHL22.163135	0.17	0.22	0	0	0.02	0	0	0	0.02
WHL22.163280	34.765	37.45	5.99	7.825	11.895	10.31	9.895	12.795	8.36
WHL22.163365	2.445	2.765	1.845	0.72	0.04	1.31	11.465	7.64	43.835
WHL22.163494	57.415	65.05	150.895	133.835	79.09	38.75	31.14	41.28	24.035
WHL22.163554	0.605	0.74	2.24	7.005	8.195	27.6	36.53	39.05	24.915
WHL22.163663	1.64	1.29	0.22	0.1	0	0.1	0.02	0.02	0
WHL22.163765	0.605	0.445	0.84	0.335	0.32	0.29	0.19	0.305	0.29
WHL22.1638	5.5	6.015	2.075	4.6	4.42	2.83	4.375	5.05	3.115
WHL22.1640	135.12	136.33	34.49	53.72	90.36	92.86	99.305	105.57	92.065
WHL22.164035	19.68	22.73	47.095	73.08	60.72	75.45	63.16	65.86	62.535
WHL22.164036	5.3	4.615	1.625	2.89	8.29	8.485	7.795	7.095	7.92
WHL22.164042	31.43	32.985	25.42	21.36	12.55	11.135	13.49	18.345	26.54
WHL22.164093	2.505	2.215	10.36	22.27	25.905	37	43.105	29.76	29.07
WHL22.164099	41.99	43.5	16.405	14.735	8.515	8.19	9.015	8.275	7.48
WHL22.164144	166.235	141.02	152.12	349.01	270.76	321.255	348.55	275.725	255.315
WHL22.164280	20.955	17.71	4.48	15.825	19.245	24.21	22.005	19.27	23.235
WHL22.164289	43.86	39.185	26.315	30.75	26.385	27.255	22.315	20.45	19.52
WHL22.164294	81.88	80.66	14	14.545	15.37	15.94	15.34	18.375	14.835
WHL22.164297	0.89	0.33	0	0.025	0	0.04	0.08	0.155	0.04
WHL22.164398	48.925	48.96	24.86	17.965	18.325	23.905	23.48	20.79	24.79
WHL22.164432	0.03	0	0	0.095	0.02	0.23	6.535	4.375	95.035
WHL22.164575	43.805	46.825	8.79	12.4	14.23	13.31	13.3	13.695	9.54
WHL22.164635	416.53	410.695	51.62	17.025	39.095	69.54	100.61	88.43	124.27
WHL22.16464	426.6	513.72	454.295	148.4	73.695	62.915	49.33	69.55	45.92
WHL22.164664	5.67	4.725	2.52	0.745	0.28	1.405	1.93	16.51	6.95
WHL22.16475	320.78	284.185	213.71	184.81	117.28	110.555	105.02	105.39	100.16
WHL22.164762	0.43	0.295	5.315	18.95	14.035	37.58	84.655	53.025	131.66
WHL22.164767	0	0	2.41	0.215	0	0	0	0.02	0.02
WHL22.16482	14.19	11.405	70.885	159.84	186.895	209.77	219.02	212.14	224.285
WHL22.165091	0.285	0.185	0.11	0.05	0.08	0.02	0.02	0.02	0.08
WHL22.165193	296.2	281.485	42.045	45.68	50.27	44.56	41.935	35.915	31.66
WHL22.165194	4.26	1.955	0.165	0.12	0.04	0.1	0.11	0.26	0
WHL22.165239	108.385	110.105	104.97	58.85	45.19	42.45	39.01	51.855	40.23
WHL22.165297	0.205	1.18	0	0	0	0.02	0.02	0.02	0
WHL22.165536	3.97	3.245	0.28	0.315	0.3	0.19	0.345	0.325	0.23
WHL22.16586	534.96	550.445	451.545	239.015	246.38	246.815	242.42	257.14	225.695
WHL22.165875	0.06	0	0	0	0.04	0.04	0.06	1.935	0.36
WHL22.165923	0	0	0.615	0	0.22	0.04	0	0	0.02
WHL22.166045	0.115	0.075	0.11	0.72	4.22	6.155	5.1	6.945	3.635
WHL22.16607	0.66	0.405	0.73	0.12	0.2	0.19	0.115	0.175	0.21
WHL22.166098	136.905	122.68	14.39	1.97	0.24	0.5	0.67	2.7	1.155
WHL22.16616	68.295	59.775	58.775	27.545	20.695	27.465	27.285	21.2	34.125
WHL22.166189	0.09	0.075	0.055	0	0.02	0.1	0.04	0.04	0
WHL22.166195	0.23	0.41	19.095	64.265	54.36	64.855	65.205	61.09	39.97
WHL22.166201	52.695	52.51	84.315	128.46	145.37	178.25	178.9	173.38	114.71
WHL22.166204	0.26	0.81	4.475	4.625	5.975	6.785	6.42	4.81	5.485
WHL22.166206	338.22	324.15	315.005	144.935	101.64	107.19	93.27	85.64	72.93
WHL22.166211	451.35	436.905	103.915	64.725	66.875	80.92	89.64	81.455	70.14
WHL22.166213	2.59	2.62	2.855	7.15	17.03	22.72	26.69	23.07	26.77
WHL22.166232	74.77	76.595	46.025	26.365	22.025	23.235	20.73	24.41	16.14
WHL22.166312	9.525	9.26	0.055	0.165	5.275	2.945	2.94	2.565	4.245
WHL22.166330	8.69	6.53	40.985	39.08	45.43	59.28	54.105	51.915	53.89
WHL22.16634	62.305	53.535	23.57	6.12	2.335	1.985	2.01	2.13	1.2
WHL22.166439	69.5	73.35	90.145	120.495	172.925	185.045	178.9	198.3	165.54
WHL22.166514	0.115	0.035	0.055	0.025	0.02	0.04	0.06	0.175	0.13
WHL22.16661	1.9	5.575	3.865	0.89	1.56	0.285	0.535	0.39	0.355
WHL22.166666	0.12	0.145	0	0.315	5.175	3.27	2.5	3.115	2.985
WHL22.166763	46.74	44.605	17.86	2.36	6.455	7.04	7.335	5.425	7.9
WHL22.166765	42.31	45.2	14.445	2.36	3.58	9.575	11.29	7.25	12.665
WHL22.166788	244.275	265.99	140.545	112.45	100.41	100.13	125.37	177.305	148.93
WHL22.166794	2.445	1.955	2.97	9.37	15.79	22.79	24.585	18.635	21.115
WHL22.16695	27.08	25.13	4.475	3.855	54.3	73.005	64.845	40.18	69.345
WHL22.166995	99.6	90.955	164.555	109.13	123.3	91.44	73.06	78.14	63.615
WHL22.167007	206.87	207.655	184.65	87.07	64.1	52.875	52.155	49.735	55.48
WHL22.167034	27.255	22.32	16.345	30.99	39.015	47.66	63.165	64.12	68.1
WHL22.167044	0.175	0.255	0.17	0.14	0.18	0.17	0.195	0	0.06
WHL22.167074	129.19	144.455	57.385	12.255	7.275	14.33	15.8	15.24	34.5
WHL22.167432	2.995	3.91	10.3	9.75	8.995	8.85	9.075	7.705	8.745
WHL22.167437	15.14	7.6	50.95	38.67	12.73	8.81	8.235	12.555	8.695
WHL22.167441	117.135	121.36	33.145	9.075	6.915	8.345	7.355	8.55	7.08
WHL22.167480	9.355	7.085	63.05	152.57	148.485	152.675	153.875	139.325	200.975
WHL22.167485	39.915	36.635	284.26	313.825	84.605	80.375	71.835	73.915	102.205
WHL22.16752	101.735	96.195	11.365	5.25	13.11	23.305	28.37	27.12	36.095
WHL22.167651	1.32	0.595	0.95	0.77	0.1	0.155	0.21	1.895	0.36
WHL22.167866	82.005	77.615	0.28	12.81	8.015	17.41	13.605	16.44	10.715
WHL22.167965	0	0.07	1.4	1.18	9.255	22.64	33.05	19.605	12.165
WHL22.168420	0.06	0.48	26.145	28.61	19.025	17.675	14.255	16.565	10.755
WHL22.168700	0.175	0.145	0	0	0.06	0	0	0	0
WHL22.168736	0.12	0.075	0.17	5.97	18.33	21.29	25.735	18.5	21.625
WHL22.169144	0.03	0	0.055	0	0.06	0.04	0.15	0.02	0.02
WHL22.169163	228.685	251.93	255.865	237.755	208.7	191.025	182.07	192.425	127.1
WHL22.169178	226.15	184.74	119.93	25.74	37.26	49	64.08	66.01	60.62
WHL22.169355	955.03	927.76	932.605	737.885	760.29	439.15	295.665	660.47	181.915
WHL22.169370	3.195	2.8	0.165	0.075	0.12	0.06	0.055	0.085	0.085
WHL22.169409	0.145	0.185	0.5	0.77	2.415	16.06	45.22	23.03	63.695
WHL22.169411	37.41	36.305	27.605	18.205	16.37	15.465	14.58	15.79	14.04
WHL22.169513	15.83	20.59	298.98	251.32	158.16	136.655	128.405	142.61	88.1
WHL22.169583	141.425	137.035	64.61	17.025	21.05	47.64	88.82	63.005	170.28
WHL22.169922	131.58	152.57	125.595	111.56	78.155	74.8	68.605	55.905	59.965
WHL22.169927	89.505	101.87	44.115	6.41	10.435	18.215	22.965	27.725	19.64
WHL22.170	2.88	3.025	1.515	1.95	1.595	1.925	2.81	4.07	6.35
WHL22.170078	25.7	27.415	50.05	32.75	35.295	44.365	48.225	53.26	52.4
WHL22.170162	93.07	98.075	95.57	100.985	144.705	204.795	222.685	186.52	192.835
WHL22.170167	730.69	699.475	286.165	160.535	206.325	212.955	213	241.195	195.625
WHL22.170171	90.195	94.125	201.275	102.435	85.905	72.585	58.595	64.625	41.64
WHL22.170174	13.295	11.365	4.085	3.35	3.98	2.65	2.485	3.595	3.13
WHL22.170210	159.93	163.56	209.17	351.68	503.155	623.925	697.655	596.73	553.795
WHL22.170291	42.595	40.295	7.9	1.565	4.36	8.62	17.08	18.285	31.445
WHL22.17034	2300.36	1592.95	13.945	4.885	1.42	1	1.105	1.825	0.59
WHL22.170369	362.48	365.28	370.09	406.045	351.84	298.5	293.145	327.78	212.565
WHL22.17057	0.03	4.13	910.165	105.42	19.425	8.595	4.965	6.97	2.585
WHL22.17059	0.03	4.095	908.09	105.395	19.425	8.595	4.965	6.97	2.585
WHL22.170742	0.375	0.37	4.2	62.87	143.905	142.205	114.67	110.45	44.155
WHL22.17115	0.835	0.81	0.73	0.22	0.12	0.15	0.095	0.325	0.15
WHL22.171180	15.425	14.245	8.51	46.33	43.255	44.16	48.565	44.42	31.285
WHL22.171226	164.94	172.615	264.665	248.885	158.805	131.425	132.875	166.205	116.08
WHL22.171231	463.61	422.48	352.84	164.775	144.305	126.435	138.285	159.49	141.13
WHL22.171238	47.975	53.275	60.47	92.49	150.4	172.78	161.075	129.275	144.565
WHL22.17128	0	0	2.855	9.125	25.285	58.175	50.15	37.335	13.935
WHL22.171286	0.925	0.74	9.07	12.835	7.815	6.08	3.435	4.205	2.9
WHL22.171318	8.175	4.28	2.41	2.58	5.235	5.525	5.845	6.42	6.745
WHL22.171325	45.3	37.155	10.19	42.065	14.985	22.44	33.51	27.73	21.16
WHL22.171348	79.085	81.99	11.98	2.765	5.28	5.25	4.755	5.18	4.285
WHL22.171389	0	0.11	0.055	0.12	0.26	5.52	12.19	6.135	11.635
WHL22.171410	61.185	67.78	25.085	51.845	77.43	74.185	81.845	97.755	82.54
WHL22.171417	23.37	16.05	13.665	10.62	8.575	8.485	9.265	10.41	8.07
WHL22.171443	0.26	0.15	0.055	0	0.04	0.1	0	0.04	0.065
WHL22.171529	136.965	145.19	57	38.48	56.645	60.645	58.365	61.33	50.57
WHL22.171684	26.075	25.425	31.58	57.525	53.785	63.895	65.185	59.315	71.255
WHL22.171845	329.12	302.16	304.805	199.16	69.455	50.545	47.055	69.385	36.38
WHL22.171861	2.995	3.395	13.215	17.65	15.07	24.79	26.825	31.585	25.595
WHL22.171869	0	0	0	0	0	0.04	0.745	0.565	5.505
WHL22.171881	9.9	9.415	3.975	1.755	1.52	3.81	4.72	2.545	3.59
WHL22.171888	17.295	22.69	2.91	1.08	1.1	1.405	1.605	7.185	1.995
WHL22.171890	158.78	151.645	15.17	13.195	21.49	24.715	23.405	18.96	18.385
WHL22.171896	168.075	160.51	20.945	36.435	41.87	64.91	83.18	100.055	91.565
WHL22.171905	0.17	0.225	0.165	0.145	0.1	0.04	0.02	0	0.04
WHL22.171908	0.835	3.065	2.575	0.43	0.44	0.115	0.04	0.175	0.06
WHL22.171911	6.705	6.42	3.755	2.43	1.975	1.965	1.835	1.61	1.615
WHL22.17194	0	0.075	0.165	1.465	22.325	30.675	30.89	24.43	19.265
WHL22.171949	0.32	0.295	0.22	0.385	0.26	0.52	0.46	0.285	0.275
WHL22.171970	404.785	393.995	94.79	77.775	97.82	109.59	99.42	88.675	98.805
WHL22.172402	20.285	27.53	4.36	3.52	16.72	2.12	17.805	14.78	19.515
WHL22.172411	0.145	0.11	0.165	0.265	0.32	0.235	0.285	0.44	0.105
WHL22.172778	0.12	0.035	0.335	2.215	2.555	3.155	5.14	5.49	5.565
WHL22.172784	0.09	0.075	0.73	0.29	0.54	0.5	0.575	0.635	0.695
WHL22.172853	0.03	0.18	0.055	0.075	0.46	1.865	2.465	2.72	3.7
WHL22.172854	99.06	102.17	49.83	9.825	9.955	13.25	13.625	14.175	14.315
WHL22.172891	146.455	128.63	76.365	77.155	66.02	63.915	60.52	65.995	61.035
WHL22.172894	119.21	115.265	124.465	52.49	33.6	41.06	54.755	47.875	55.115
WHL22.172906	0.605	0.7	0.56	0.025	0.04	0.02	0.04	0.04	0.04
WHL22.172911	0	0	0.11	0.19	2.775	2.42	2.79	2.025	3.57
WHL22.172929	43.89	42.505	35.5	24.995	21.55	32.465	41.095	40.99	38.64
WHL22.173034	70.62	77.34	19.76	32.1	42.685	48.125	47.725	48.65	39.28
WHL22.173069	298.16	310.895	68.865	24.32	16.19	23.1	32.705	69.22	46.77
WHL22.173075	156.335	145.52	59.695	5.61	1.38	0.98	1.09	2.28	1.05
WHL22.173117	43.685	39.48	31.245	16.66	19.245	19.775	22.24	27.1	22.025
WHL22.173123	6.645	6.27	72.725	119.025	98.595	98.49	93.21	92.71	129.2
WHL22.173136	0.26	0.145	1.735	0.095	0.02	0.12	0.02	0.04	0.02
WHL22.173151	0.23	0.295	0.335	0.025	0.06	0.02	0.02	0.02	0.105
WHL22.173168	25.15	25.53	18.03	11.895	21.165	21.79	21.835	32.785	18.195
WHL22.173175	34.39	32.135	22.225	13.775	13.15	16.235	20.955	16.2	30.035
WHL22.173177	0.52	0.295	0.895	1.035	1.18	1.94	3	2.285	2.185
WHL22.173213	98.46	49.295	98.935	159.4	400.23	497.115	644.545	757.735	702.93
WHL22.173241	0	0	0.785	0	0	0.02	0	0	0
WHL22.173450	16.175	15.715	6.665	1.11	0.36	0.25	0.21	0.5	0.275
WHL22.173504	83.835	99.03	38.75	11.365	15.59	16.445	15.225	18.7	10.8
WHL22.173514	175.185	161.42	75.355	88.88	62.8	55.72	55.33	60.11	50.59
WHL22.173519	88.38	83.5	20.045	24.825	13.79	17.33	17.575	16.48	14.37
WHL22.173528	43.745	46.975	12.545	15.12	19.625	23.545	21.32	25.695	19.275
WHL22.173562	0.17	0.41	0.22	0.1	0	0	0.02	0.02	0.04
WHL22.173564	0	0.075	28.56	44.09	106.415	89.015	73.075	112.155	87.255
WHL22.17392	38.015	41.36	99.995	76.355	95.32	102.68	104.255	105.51	114.775
WHL22.174072	0.43	0.37	0.39	0.075	0	0.04	0.06	0.065	0.04
WHL22.174304	0.435	0.33	0.45	0.165	0.16	0.06	0.095	0.175	0.15
WHL22.174438	0.03	0.185	0.895	0.14	0.12	0.1	0.15	0.11	0.105
WHL22.174471	0.115	0	1.46	0.435	0.96	0.945	1.05	0.785	1.28
WHL22.174492	55.23	55.675	9.52	14.565	19.425	17.355	14.555	8.88	8.175
WHL22.174614	1.21	1.03	0.335	0.265	0.32	0.305	0.4	0.28	0.23
WHL22.174772	0	0.52	6.775	1.3	2.235	1.54	1.28	1.025	0.925
WHL22.17507	30.1	28.115	21.215	27.86	31.9	43.43	37.62	33.615	35.595
WHL22.175358	0.2	0.075	0.22	0.12	0.42	0.75	0.82	0.72	0.86
WHL22.175424	0.775	0.74	0.11	0	0	0.06	0.15	0.7	1.09
WHL22.175612	22.595	24.645	7.335	0.435	0.52	0.54	0.65	2.285	1.03
WHL22.175730	0.145	0.885	6.27	3.42	0.68	0.23	0.325	2	0.775
WHL22.17629	0.06	0.075	0	0.025	2.175	5.23	9.015	5.175	14.58
WHL22.176298	0	0	2.13	0.625	0.02	0.04	0.13	0.475	0.4
WHL22.176321	73.73	81.43	58.675	29.86	10.395	11.945	14.955	12.625	13.53
WHL22.176382	193.23	211.82	139.465	168.555	172.455	196.545	222.785	228.16	202.335
WHL22.176403	56.235	66.34	67.405	30.53	18.085	18.405	15.685	18.02	16.18
WHL22.17644	90.825	81.395	46.975	27.33	29.22	29.965	37.71	24.685	37.565
WHL22.176480	81.33	75.79	58.4	33.905	27.62	26.885	27.075	21.115	21.9
WHL22.176487	89.59	101.28	77.995	124.275	129.6	112.92	95.98	120.255	74.585
WHL22.17652	361.675	368.385	65.895	64.815	73.535	82.48	87.195	78.32	98.51
WHL22.176642	0.665	0.625	0.615	8.985	15.255	22.29	41.63	103.605	42.36
WHL22.17667	52.18	56.715	109.345	68.99	57.1	41.815	38.995	35.03	27.715
WHL22.176695	0.145	0	0	0	0	0	0	0	0
WHL22.17678	12	11.29	4.255	2.41	6.155	6	5.155	5.005	3.825
WHL22.177151	12.98	13.58	3.86	3.01	1.24	1.325	1.59	2.355	1.24
WHL22.177408	106.57	105.525	3.695	7.655	13.55	17.655	21.61	20.16	19.68
WHL22.177463	0	0.625	0.17	0	0	0	0	0.02	0
WHL22.177493	681.105	800.295	778.245	303.57	230.315	183.215	161.9	155.74	100.37
WHL22.177504	132.96	118.15	147.975	132	111.265	99.705	100.245	124.655	106.085
WHL22.177541	0.06	0.255	0.225	0.095	0.1	0.115	0.06	0.065	0.13
WHL22.177574	147.21	124.605	70.83	39.875	86.205	114.01	114.845	101.73	117.085
WHL22.17762	84.47	88.7	28.61	74.07	52.325	62.68	57.025	64.355	51.395
WHL22.17771	0.69	0.665	0.165	0.145	0.26	0.12	0.38	0.46	0.63
WHL22.178228	0	0	0	0.05	0.18	0.6	0.495	0.24	0.21
WHL22.17844	10.56	12.065	14.67	6.385	16.15	17.06	18.21	15.54	12.225
WHL22.17850	1.96	1.885	0.895	0.095	0.04	0.1	0.25	0.2	0.17
WHL22.178580	56.67	60.22	29.56	36.165	85.36	71.95	61.555	62.495	61.35
WHL22.178817	0.03	0.185	46.135	100.32	53.46	27.155	9.665	27.17	3.615
WHL22.178838	1.845	0.625	0.11	0.095	0.16	0.17	0.25	0.26	0.17
WHL22.178841	4.375	2.255	1.12	0.12	0.44	0.46	0.595	0.63	1.18
WHL22.178865	0	0.07	0.165	0.025	0.1	1.485	7.07	5.245	48.3
WHL22.17887	26.305	25.165	2.18	4	12.39	13.965	16.315	17.45	13.51
WHL22.178879	0.405	0.52	36.45	9.925	1.995	1.27	0.645	1.59	0.715
WHL22.17892	67.865	64.57	18.08	10.26	26.865	32.28	33.34	33.88	20.36
WHL22.178943	0.03	0	0	0.05	0.84	0.94	0.67	0.435	0.44
WHL22.17913	25.41	87.555	1376.16	1050.6	583.22	514.665	492.51	1179.95	600.28
WHL22.179233	232.425	197.44	41.66	74.885	80.245	79.68	92.925	75.235	76.24
WHL22.179271	0	0	0	0.025	0.04	0.325	3.515	2.55	25.915
WHL22.179276	242.84	242.305	26.875	30.24	38.615	39.47	53.435	63.885	61.625
WHL22.179288	3.165	1.515	0.225	0.12	0.08	0.175	0.27	0.285	0.44
WHL22.179331	0	0	0	0.025	0.02	0.04	0.04	0.33	0
WHL22.179444	4.95	4.17	0.67	2.36	6.775	8.1	9.57	8.84	8.325
WHL22.179470	42.65	38.37	7.67	6.96	9.835	12.12	10.05	8.815	9.265
WHL22.179475	47.69	49.37	19.205	3.59	6.455	9.29	9.745	6.19	8.61
WHL22.179501	178.98	187.44	216.965	145.105	51.965	29.27	23.12	34.86	13.92
WHL22.179515	0.06	0	0.055	1.64	1.48	4.65	18.47	3.44	17.875
WHL22.179516	43.66	36.75	26.2	12.64	14.795	16.235	16.025	15.845	20.655
WHL22.179567	244.885	257.245	121.555	84.81	117.23	103.97	96.675	87.84	81.24
WHL22.179591	66.83	70.585	132.525	94.9	53.125	46.465	38.495	52.72	36.33
WHL22.179666	3.995	7.295	0.11	0	0.08	0.04	0.075	0.065	0
WHL22.179814	27.11	24.98	1.845	1.055	4.5	5.635	6.305	5.205	4.645
WHL22.180051	22.45	7.675	158.45	600.875	1364.43	2388.99	2844.61	3005.01	3943.37
WHL22.18009	332.17	308.465	157.61	146.645	182.78	224.385	173.145	231.265	251.52
WHL22.18052	0.605	0.255	0.11	0.335	0.48	0.31	0.4	0.61	0.275
WHL22.180554	1.355	0.52	0.45	1.59	0.8	0.44	0.325	0.505	0.25
WHL22.180561	79.515	93.98	126.655	95.21	85.585	102.8	122.08	125.54	147.635
WHL22.180583	0.26	0.035	0.785	0.095	0.04	0.06	0.08	0.63	0.82
WHL22.180585	0.03	0	0	0.12	0	0.04	0.23	0.135	0.8
WHL22.180621	3.855	3.505	5.49	4.885	5.675	7.25	8.275	6.86	5.925
WHL22.180622	87.58	83.13	3.415	4.79	8.775	14.305	17.365	10.98	18.255
WHL22.180719	0.46	0.225	1.79	0.48	0.04	0.08	0.06	0.085	0
WHL22.180831	199.645	184.115	31.355	12.74	9.835	11.08	11.08	16.545	10.86
WHL22.180832	39.025	41.4	10.02	30.05	25.585	39.55	43.275	38.68	41.12
WHL22.180869	0	0	0	0.795	2.835	1.175	1.315	0.895	1.975
WHL22.181079	18.365	19.04	5.15	1.445	3.58	4.095	3.48	3.765	3.57
WHL22.181114	22.735	22.915	17.525	8.16	7.215	17.64	23.215	21.445	28.945
WHL22.181124	3.625	3.58	2.405	0.48	0	0.135	0.08	0.26	0.085
WHL22.181134	119.555	114.53	145.685	145.125	126.745	153.555	160.345	145.735	158.615
WHL22.181156	16.635	17.53	6.05	2.94	2.335	2.805	5.825	5.51	9.195
WHL22.181158	3.11	2.805	1.905	0.435	0.26	0.27	0.4	0.655	0.335
WHL22.181207	30.45	25.275	19.09	35.515	37.19	30.87	30.835	37.92	34.76
WHL22.181321	0	0.37	41.79	148.16	129.26	90.46	84.12	69.2	57.925
WHL22.181380	711.2	742.105	631.855	527.675	420.465	572.175	643.125	699.785	695.21
WHL22.181416	0	0	0.11	1.81	10.195	18.58	20.445	17.415	14.915
WHL22.18154	152.88	155.895	238.34	142.02	74.975	61.43	57.085	75.925	42.33
WHL22.181594	0.03	0.11	0.055	0.075	0.54	7.21	15.57	7.775	28.95
WHL22.181611	3.51	5.09	74.185	123.575	58.91	21.43	12.875	106.6	8.38
WHL22.18204	5.585	3.84	12.54	8.355	9.415	10.37	10.24	8.78	9.79
WHL22.182076	3.8	3.47	0.45	0.605	0.44	0.54	0.515	0.46	0.46
WHL22.182085	46.965	45.275	27.885	6.26	4.595	5.385	9.475	9.275	11.98
WHL22.182089	0.17	0.295	0.225	2.965	4.52	6.02	5.52	5.33	4.895
WHL22.182098	8.26	8.82	4.875	4.525	5.515	4.555	5.31	5.27	4.04
WHL22.182160	449.74	453.355	400.735	280.255	402.88	416.75	449.905	418.16	308.22
WHL22.182208	1151.8	988.71	765.335	703.38	388.42	193.85	161.915	289.48	150.625
WHL22.182248	2.475	2.545	6.775	25.28	52.965	76.145	86.335	60.47	71.635
WHL22.182251	2.705	3.695	3.475	2.24	2.115	2.885	3.265	5.61	3.72
WHL22.18227	1.265	0.7	1.85	1.83	7.175	45.465	62.225	72.655	91.33
WHL22.182540	4.895	0.735	0.11	0.095	0.12	3.015	0.04	0.065	0
WHL22.182576	0.205	0.555	22.62	23.985	25.53	32.715	30.015	24.185	28.625
WHL22.182622	26.65	25.715	153.02	260.655	105.895	116.665	98.925	82.28	145.855
WHL22.182634	117.825	118.81	88.635	56.2	44.995	53.775	72.635	71.335	86.155
WHL22.182732	81.94	79.4	54.305	65.78	57.265	63.29	62.55	70.905	76
WHL22.182769	0.205	0.15	0.675	0.41	0.48	0.54	0.555	0.61	0.315
WHL22.183003	49.675	56.415	68.865	79.435	67.095	71.34	65.795	68.6	69.925
WHL22.183228	0	0	2.41	0.36	0.26	0.04	0.06	0.065	0.295
WHL22.183396	212.965	198.32	73.01	35.83	34.36	34.965	37.77	33.355	33.445
WHL22.183408	29.15	25.13	6.885	7.71	18.71	28.16	31.085	30.63	25.335
WHL22.183450	5.44	5.35	5.375	1.805	0.24	0.115	0.08	0.96	0.04
WHL22.183732	0	0	2.63	15.675	71.44	76.28	89.025	124.29	96.215
WHL22.183794	44.725	43.055	8.23	25.55	49.03	50.77	59.51	61.785	51.19
WHL22.1838	0.49	0.48	0.055	0.025	0.16	0.215	0.19	0.15	0.21
WHL22.183905	33.615	31.915	21.22	45.125	21.49	36.37	59.76	393.855	113.735
WHL22.183998	0.17	0.145	0.055	0	0	0	0	0.04	0.04
WHL22.184070	367.175	375.955	405.685	374.81	334.37	329.14	333.57	405.22	344.945
WHL22.184083	0.145	0.035	0	0.025	0	0	0.02	0	0.02
WHL22.1841	0.285	0.26	0.11	0.05	0.16	0.095	0.21	0.46	0.085
WHL22.184109	0	0.035	0.11	0.24	0.06	0.115	0.365	0.96	5.005
WHL22.184130	0.145	0.07	0.165	0.025	0	0.02	2.77	2.435	22.69
WHL22.184243	1.125	1.735	0.955	0.455	0.62	0.365	0.31	0.33	0.295
WHL22.184359	135.925	148.7	268.41	1088.3	2948.68	4798.09	6062.87	6601.88	6576.65
WHL22.1844	80.325	77.225	30.685	30.22	27.225	21.545	22.12	23.97	18.7
WHL22.184447	195.04	219.72	376.86	437.615	382.085	335.26	332.385	393.75	285.04
WHL22.184705	7.37	3.36	34.05	78.1	21.785	47.73	23.535	23.015	54.33
WHL22.184724	19.455	21.175	19.37	32.27	311.295	1187.91	2973.73	1515.62	5331.5
WHL22.184759	110.545	93.095	58.395	26.56	52.545	68.16	75.655	82.415	76.71
WHL22.184865	0	0.035	0.28	48.785	109.665	44.045	31.905	28.755	14.585
WHL22.184934	31.685	33.465	228.535	174.955	100	101.84	95.16	106.4	92.345
WHL22.184964	254.475	277.095	118.475	92.42	112.83	135.5	150.91	166.255	147.49
WHL22.185016	50.51	51.035	45.295	17.895	24.385	31.91	34.6	33.37	35.15
WHL22.185037	2.615	2.44	1.96	2.43	6.835	17.04	28.085	11.255	26.09
WHL22.185050	86.255	93.645	59.235	22.325	28.46	31.735	30.26	39.015	21.68
WHL22.185051	576.255	503.805	463.75	480.02	321.62	395.885	375.03	316.68	326.815
WHL22.185055	4.12	2.62	0.955	0.265	0.36	0.425	0.63	1.395	0.36
WHL22.185075	4.085	3.505	4.59	3.035	4.34	3.98	4.815	7.165	9.285
WHL22.185078	0.06	0.035	0.11	0.385	7.315	13.985	21.415	20.72	27.395
WHL22.185096	0.09	0	0	0	0.06	1.04	1.625	1.415	6.975
WHL22.185256	3.57	3.245	2.575	3.255	0.68	3.815	2.255	5.39	3.485
WHL22.185333	94.08	98.885	137.11	189.91	193.795	216.76	205.93	201.53	248.56
WHL22.185357	72.725	71.655	44.06	21.09	28.04	28.005	24.63	26.67	23.42
WHL22.185367	0	0.035	0.9	1.755	1.76	2.29	2.235	2.57	2.055
WHL22.185480	0.405	0.775	0	0.025	0.02	0	0	0	0
WHL22.185502	0.06	0.63	29.005	6.645	0.12	0.08	0.595	3.155	4.285
WHL22.18554	0.085	0.075	0	0.05	0.04	0.365	0.42	0.28	0.465
WHL22.18560	167.96	178.26	134.605	107.415	72.93	63.89	61.095	73.02	43.47
WHL22.18561	0.23	0.11	3.245	10.57	10.635	10.25	10.185	9.665	7.255
WHL22.185713	73.76	79.555	144.57	160.47	111.405	94.135	92.45	106.525	56.795
WHL22.1859	125.995	134.68	121.67	55.36	38.905	35.465	35.73	46.7	25.145
WHL22.185950	0.55	0.255	0.225	0.05	0.06	0.095	0.19	0.15	0.275
WHL22.186011	0	0.035	0.165	3.71	8.38	12.505	14.425	16.13	16.11
WHL22.186040	1.035	0.845	43.84	179.32	439.325	682.31	794.06	882.35	1288.11
WHL22.186130	6.88	6.97	5.265	14.035	19.945	29.29	36.74	27.79	29.31
WHL22.186176	39.23	39.92	9.515	7.22	8.15	6.825	6.285	6.99	6.615
WHL22.1862	93.59	95.825	33.875	56.59	45.97	49.025	45.145	39.46	37.185
WHL22.186266	0	0	0	0	0.28	10.075	27.4	16.375	107.7
WHL22.186269	10.22	9.74	15.79	22.875	71.68	157.715	258.45	129.09	236.67
WHL22.186283	0.66	0.185	0.28	0.385	0.32	0.345	0.285	0.52	0.38
WHL22.186396	34.045	30.11	30.74	25.55	75.89	138.19	203.085	126.435	366.005
WHL22.186591	0	0	0	0	0	0.02	0.245	0.48	8.57
WHL22.186660	0.115	0.07	0.22	2.6	67.035	180.29	236.88	87.635	215.795
WHL22.18680	4.95	4.13	4.42	2.215	3.76	5.345	6.535	4.725	6.68
WHL22.18689	300.03	320.605	106.88	31.975	27.425	32.075	39.3	34.285	28.77
WHL22.18706	0	0	0.165	0.075	0.38	0.595	0.69	0.41	0.63
WHL22.187431	2.39	1.955	1.845	0.34	0.22	0.365	0.475	0.24	0.27
WHL22.187455	12.49	14.1	5.095	11.345	36.235	59.485	61.9	31.405	53.575
WHL22.187805	1.355	2.765	3.36	0.845	0.68	0.325	0.305	0.155	0.42
WHL22.187923	0.06	0	1.235	2.215	6.335	18.6	40.655	67.375	127.21
WHL22.187954	470.86	383.035	196.02	250.88	277.465	266.51	300.29	272.65	237.815
WHL22.188087	0.115	0.335	8.455	10.74	24.105	34.255	68.89	155.48	232.215
WHL22.188090	0.92	0.85	0.45	0.34	1.26	15.615	57.62	32.34	84.945
WHL22.188306	0.925	0.59	0.28	0.36	0.3	0.365	0.435	0.65	0.375
WHL22.18832	0	0.035	0	0.025	0.02	0.1	0.23	0.22	0.295
WHL22.188398	4.29	4.28	3.75	4.07	3.52	5.905	6.44	6.05	5.92
WHL22.188406	132.19	132.69	117.745	100.92	118.805	85.44	74.645	81.88	43.965
WHL22.188466	1.525	1.105	5.765	6.21	9.535	9.77	8.845	6.505	8.45
WHL22.18870	109.19	97.12	48.99	16.95	16.87	18.405	20.405	19.26	25.665
WHL22.188780	113.13	107.515	75.25	36.53	24.58	33.405	35.615	38.67	30.395
WHL22.18880	0.695	0.555	0.56	0.96	0.66	1.595	0.095	1.53	1.105
WHL22.189077	815.47	844.815	98.425	77.465	75.83	77.84	80.185	93.23	69.355
WHL22.189383	218.58	229.1	234.65	320.205	298.635	267.01	247.485	258.605	189.705
WHL22.189392	206.495	221.425	160.02	74.98	54.425	68.705	77.45	85.125	73.425
WHL22.18994	0.085	0.145	0.11	0.025	0.06	0.115	0.19	0.325	0.21
WHL22.1900	29.01	26.565	26.705	13.36	29.555	70.51	126.86	76.77	166.17
WHL22.19005	0	0	0	0	0.02	0.1	1.245	0.675	4.855
WHL22.19008	329.53	314.44	78.67	49.385	42.715	46.68	41.99	38.51	35.805
WHL22.190096	19.025	20.44	62.82	140.715	64.665	59.565	50.63	57.875	63.67
WHL22.190105	10.765	11.405	59.91	98.965	84.025	72.815	65.775	80.435	46.65
WHL22.190108	0.03	0	0.055	0.12	0.12	0.04	0.04	0.09	0
WHL22.190151	125.225	90.955	8.79	13.87	19.445	29.595	35.975	42.83	49.57
WHL22.190274	89.65	101.1	679.2	813.3	745.305	454.68	271.06	402.245	158.495
WHL22.190669	35.11	33.135	111.145	58.055	68.255	54.835	47.38	59.69	34.645
WHL22.190948	0	0	0	0.1	1.4	1.095	0.975	0.5	0.105
WHL22.19105	9.5	1.915	5.765	7.03	2.015	16.845	106.265	254.165	840.67
WHL22.191069	105.68	104.38	12.6	13.41	12.29	14.195	15.605	17.07	14.83
WHL22.191089	417.79	401.6	260.285	111.61	93.485	95.8	87.54	94.885	87.545
WHL22.191099	0	0	0	1.495	24.37	11.655	6.225	10.705	5.695
WHL22.191104	130.285	147.705	97.085	81.025	48.885	38.615	39.855	42.65	39.795
WHL22.191113	29.155	25.865	20.55	24.68	40.755	45.08	43.905	34.375	32.7
WHL22.191170	2.62	1.96	1.23	0.625	0.42	0.23	0.515	0.78	0.335
WHL22.19119	141.945	150.36	16.795	14.64	24.065	23.04	25.425	25.95	23.255
WHL22.191492	0	0	0.45	1.155	2.92	6.005	9.685	5.135	14.685
WHL22.191619	2.995	5.055	6.555	10.81	17.15	18.02	16.83	16.46	14.475
WHL22.191634	1.095	0.11	0	0.025	0.14	0.04	0.095	0.22	0.06
WHL22.191647	2.215	2.325	2.185	1.01	0.26	0.345	0.21	0.655	0.185
WHL22.191655	16.2	16.745	29.95	31.615	18.15	16.14	15.495	17.07	14.875
WHL22.191686	0	0.63	28.835	15.775	10.695	12.985	31.085	19.92	49.095
WHL22.191689	25.035	20.845	4.48	8.36	4.02	4.485	9.65	9.585	4.33
WHL22.191727	289.95	383.14	576.81	890.005	526.715	459.325	410.835	453.065	481.405
WHL22.191730	12.23	9.52	19.595	33.785	14.13	15.48	16.01	16.125	14.225
WHL22.191742	143.985	129.81	81.41	21.65	33.16	34.6	34.965	39.97	32.24
WHL22.191744	400.415	362.04	22.73	47.8	47.295	50.565	50.93	47.045	47.685
WHL22.191745	209.78	200.91	157.165	118.375	138.56	138.27	137.385	161.18	119.64
WHL22.19177	36.175	38.15	16.18	14.66	25.62	27.31	27.815	29.215	18.27
WHL22.19179	0.03	0.07	6.44	2.19	0.8	3.21	13.315	10.8	11.66
WHL22.19186	5.615	4.465	1.12	1.955	5.995	9.52	12.345	13.43	8.43
WHL22.191866	154.98	126.595	42.94	31.835	37.615	41.26	43.235	36.37	34.47
WHL22.191889	52.12	46.82	16.85	15.845	16.29	14.155	14.65	13.845	12.23
WHL22.192028	283.91	285.8	225.46	181.605	187.98	172.445	166.025	175.97	126.815
WHL22.192068	3.31	3.69	4.315	4.31	6.115	6.69	7.735	6.415	6.35
WHL22.192209	12.895	12.285	153.3	110.4	593.6	893.42	1229.06	814.35	1934.01
WHL22.192210	11.54	14.055	103.69	96.535	83.4	94.06	83.225	85.705	109.17
WHL22.192278	236.165	242.525	211.53	189.43	149.105	157.925	191.275	160.23	225.105
WHL22.192334	29.99	23.095	6.775	6.765	8.535	9.305	9.745	9.885	6.24
WHL22.192539	25.615	25.645	12.765	5.415	20.9	31.065	39.185	25.905	32.62
WHL22.192541	26.88	26.94	30.625	53.77	57.605	68.58	69.43	63.635	74.145
WHL22.192550	169.97	160.655	174.98	122.055	93.465	78.43	77.89	101.545	80.575
WHL22.192583	0	0.22	0.055	0.075	0.02	0.1	0.08	0	0.06
WHL22.192596	12.2	14.465	131.015	241.97	364.805	441.265	467.48	531.23	331.595
WHL22.192605	105.65	101.06	126.71	144.43	67.7	102.055	136.98	794.86	161.31
WHL22.192611	3.685	4.095	54.985	85.12	144.545	212.475	223.7	245.445	222.5
WHL22.192617	4.29	3.135	7.565	10.245	53.085	68.32	102.655	103.105	92.32
WHL22.193100	1083.85	1120.98	1072.86	995.09	953.555	682.67	619.5	750.22	474.68
WHL22.193288	1.065	1.255	0.67	0.12	0.04	0.235	0.15	0.435	0.23
WHL22.19329	0.03	0	0.335	0.025	0.02	0	0	0.02	0
WHL22.19332	0.03	0.11	0.28	0	0	0	0.04	0	0
WHL22.193354	83.75	76.34	60.805	39.66	21.67	22.295	20.825	21.355	23.13
WHL22.193375	0.405	0.26	2.52	13.7	13.875	18.62	13.145	15.605	7.075
WHL22.193379	91.2	72.91	109.675	88.08	87.86	74.625	71.15	72.815	84.325
WHL22.193396	14.02	14.135	19.035	22.61	28.58	33.06	41.055	35.455	40.985
WHL22.193475	0	0	0.055	1.495	22.265	25.775	28.795	21.775	24.18
WHL22.19353	0.345	5.72	439.195	85.48	30.82	34.985	39.145	43.35	41.51
WHL22.193534	0.06	0.59	33.98	13.34	7.655	12.14	20.08	15.74	26.175
WHL22.19363	75.605	76.785	115.28	115.435	91.145	96.78	89.355	79.22	71.79
WHL22.193643	0.09	0.11	0.28	0.05	0.4	0.1	0.075	0.065	0.085
WHL22.193865	373.015	372.305	380.34	361.695	401.345	316.78	313	284.535	288.2
WHL22.193870	0.29	0.07	0.28	0.14	0.06	0.06	0.04	0.02	0
WHL22.193906	397.105	405.77	216.51	43.68	42.31	44.565	44.8	53.28	39.42
WHL22.19393	3.54	7.97	8.455	0.675	0.62	0.67	0.535	0.41	0.44
WHL22.193975	0	0.405	48.88	1.785	0.22	0.5	2.54	3.57	0.9
WHL22.193991	0	0	0.055	0.215	0.06	0.02	0.08	0.085	0.04
WHL22.194017	92.035	98.595	63.55	64.75	60.085	57.025	51.165	58.365	35.375
WHL22.194074	547.505	547.555	659.385	728.345	824.97	783.86	748.265	832.41	669.055
WHL22.194092	4.375	2.585	2.855	2.625	3.5	2.925	3.175	3.83	3.195
WHL22.194095	10.275	11.4	11.14	7.73	2.135	0.655	0.69	1.83	0.71
WHL22.194110	0.345	0.37	1.46	0.675	0.76	0.735	0.615	0.655	0.605
WHL22.194112	204.135	213.415	210.13	226.22	474.255	588.94	709.065	495.78	552.395
WHL22.194201	0.29	2.435	45.295	84.42	156.995	145.05	132.02	135.685	107.43
WHL22.194357	14.245	14.165	0.34	2.915	3.76	4.385	6.19	20.205	6.79
WHL22.194362	33.85	32.725	18.755	9.22	13.955	12.945	11.005	13.58	10.795
WHL22.194379	1.9	1.845	0.84	0.12	0.06	0.1	0.155	0.13	0.105
WHL22.194426	130.89	136.705	87.96	58.345	69.315	67.125	73	60.86	77.02
WHL22.194427	57.705	51.135	14.055	2.84	7.355	19.35	23.79	20.755	24.735
WHL22.194915	598.855	587.545	558.37	456.035	319.395	237.285	184.515	210.3	201.67
WHL22.194961	787.555	733.97	439.07	190.27	187.425	170.905	173.68	222.47	166.14
WHL22.195074	1.44	0.445	0.055	0.17	0.18	0.08	0.15	0.26	0.125
WHL22.195383	133.94	132.945	88.24	91.43	101.155	99.9	90.75	92.685	81.095
WHL22.195413	95.72	102.58	87.065	101.66	127.615	115.76	102.765	103.425	145.02
WHL22.195415	0.145	0.26	1.455	9.025	24.445	25.04	28.01	30.81	29.64
WHL22.195421	9.785	11.845	26.535	18.035	12.19	13.69	11.945	10.01	10.605
WHL22.195437	0.405	0.26	0.95	4.31	7.375	9.35	9.535	8.12	9.52
WHL22.195471	111.81	103.285	190.98	173.88	207.505	189.705	188.93	230.84	165.445
WHL22.195483	0.72	2.875	227.87	301.255	221.78	184.44	167.305	149.905	126.77
WHL22.19569	0.145	0.365	4.59	5.49	24.36	52.155	97.035	63.78	118.23
WHL22.1957	8.405	7.6	8.9	21.19	30.86	34.68	33.355	36.01	34.105
WHL22.195798	8.03	8.265	4.085	0.17	0.04	0	0.04	0.085	0.19
WHL22.195805	49.615	49.515	13.44	2.935	2.575	6.865	10.09	13.49	9.475
WHL22.195814	100.125	99.545	33.135	10.8	37.415	32.035	38.67	31.545	27.325
WHL22.195816	2.935	2.065	0.84	0.315	0.84	2.17	2.445	2.155	2.04
WHL22.195862	66.11	73.945	44.85	19.915	14.825	15.58	16.085	11.78	11.345
WHL22.195873	0	0	0	0	0.04	0.46	0.57	0.7	0.565
WHL22.195879	126.17	136.93	132.25	65.035	83.23	91.3	111.705	106.34	90.425
WHL22.195882	0	0	0	0	0.04	0.635	3.04	2.545	5.23
WHL22.195885	1.15	2.875	3.195	1.425	0.74	0.58	0.59	0.61	0.375
WHL22.195898	0	0	0.28	0	0.02	0.02	0.02	0.02	0.04
WHL22.195913	16.405	15.015	7.335	7.175	17.03	15.755	14.96	13.83	12.02
WHL22.195956	0.695	0.995	1.01	0.985	0.28	0.35	0.245	0.305	0.21
WHL22.19600	20.55	20.145	5.765	1.975	2.195	2.88	5.08	13.995	10.125
WHL22.196039	309.495	272.605	260.13	145.03	132.2	106.48	106.68	110.61	107.905
WHL22.196095	0	0.035	0.84	0.46	0.28	0.02	0.36	0.02	0.02
WHL22.196101	83.545	89.295	78.445	45.775	55.865	54.985	55.5	59.315	53.115
WHL22.196103	22.13	14.725	5.71	9.37	11.61	9.69	8.75	9.82	5.925
WHL22.196109	80.41	71.58	47.315	44.81	31.255	34.825	32.88	39.405	34.065
WHL22.196209	0.81	1.185	3.81	6.45	7.335	9.75	9.915	11.04	7.265
WHL22.196275	8.005	7.935	12.765	9.99	9.475	18.45	25.43	20.155	36.93
WHL22.196334	69.33	63.39	105.605	62.295	94.205	100.915	114.935	123.8	105.165
WHL22.19651	125.025	119.105	24.47	43.415	49.63	54.085	61.06	57.175	55.85
WHL22.19679	348.955	331.745	303.855	101.085	72.255	64.855	72.2	79.63	95.65
WHL22.196812	21.21	22.69	163.94	160.105	101.655	100.345	80.395	81.2	80.57
WHL22.19685	57.99	60.475	82.81	99.565	120	140.365	149.785	172.12	165.83
WHL22.19692	229.775	202.345	209.3	150.81	105.015	93.375	72.79	40.605	41.43
WHL22.197020	59.315	60.955	33.645	29.28	25.985	25.37	21.245	24.575	20.49
WHL22.197044	0	0	0.17	0	1.055	0.885	0.535	0.02	1.455
WHL22.197059	3.31	3.615	0.895	0.605	0.32	0.23	0.5	0.61	0.255
WHL22.197069	0.375	0.48	0.055	0.095	0.02	0.02	0.02	0.065	0
WHL22.197173	0.49	0.11	0.675	1.64	2.355	7.31	11.71	10.1	13.13
WHL22.19719	0.175	0.07	7.84	4.19	6.795	5.52	6.745	4.2	5.63
WHL22.197203	24.69	25.98	81.125	110.26	75.785	63.8	55.405	83.075	53.505
WHL22.197204	151.465	161.685	129.45	129.45	159.315	224.84	240.855	201.045	182.53
WHL22.197226	0.175	0	0	0	0.04	0.06	0.075	0.02	0.04
WHL22.197232	19.455	21.365	29.005	21.38	28.6	35.505	40.635	35.635	45.045
WHL22.197535	68.955	86.01	41.595	36.19	22.545	30.255	27.185	37.435	36.75
WHL22.19754	9.295	7.82	3.305	2.385	2.275	2	1.93	3.965	3.635
WHL22.197560	224.305	234.075	100.675	38.745	61.625	51.62	58.155	57.705	54.135
WHL22.197596	0.09	0.185	0.28	0.05	0.16	0.195	0.115	0.13	0.105
WHL22.197603	120.555	111.8	139.97	115.15	83.18	61.16	71.28	82.85	62.94
WHL22.197749	361.85	388.12	376.92	307.035	344.455	356.245	411.215	347.525	412.455
WHL22.197865	0	0	0	0.025	0.08	0.04	0.155	0.37	0.63
WHL22.197965	22.535	77.78	14.28	0.99	3.9	2.155	1.585	1.285	1.49
WHL22.197968	0.835	0.37	0.165	0.145	0.06	0.135	0.095	0.26	0.13
WHL22.197973	125.45	119.1	88.64	85.12	121.75	150.155	158.59	162.76	149.3
WHL22.198074	29.9	22.505	12.43	19.525	26.985	30.87	26.305	25.495	25.295
WHL22.198097	47.775	40.365	25.085	29.205	23.005	22.635	22.14	24.75	15.53
WHL22.1981	420.19	384.765	191.15	79.675	105.945	118.77	118.68	132.24	118.955
WHL22.198142	91.035	86.225	207.77	197.645	121.23	110.9	96.175	99.375	122.265
WHL22.198157	0	0	2.075	8.165	9.595	9.1	8.215	9.465	4.855
WHL22.198161	223.65	212.415	173.795	205.74	230.34	240.84	259.12	231.295	203.525
WHL22.198166	4.085	2.66	2.58	1.325	1.655	1.445	1.43	1.435	1.135
WHL22.198173	722.51	662.94	430.235	252.35	475.39	654.57	760.55	695.77	773.375
WHL22.198287	86.74	88.005	16.855	15.8	8.795	12.195	12.935	19.88	12.965
WHL22.198302	0.26	0.075	0.395	1.76	16.93	110.745	210.845	85.49	341.215
WHL22.198309	0	0	0.11	0.025	0.34	7.405	8.635	2.525	4.04
WHL22.198314	430.195	401.925	77.815	41.345	39.455	41.33	40.105	41.16	33.05
WHL22.198320	1.725	1.585	1.625	1.395	1.775	1.595	1.97	2.375	2.04
WHL22.198321	24.55	25.35	40.035	49.41	63.895	64.92	59.51	67.605	58.655
WHL22.198323	395.465	393.73	128.77	38.84	30.56	31.12	30.59	26.735	24.86
WHL22.198372	136.935	137.515	75.755	48.88	44.37	54.045	55.67	60.24	63.74
WHL22.198376	53.245	53.98	44.85	41.03	64.905	82.995	86.87	69.635	75.585
WHL22.198387	56.35	57.01	59.74	73.105	101.675	138.345	154.1	178.525	175.43
WHL22.198436	74.625	68.775	17.015	37.2	80.47	88.03	106.05	103.32	116.735
WHL22.198471	296.745	306.025	152.015	90.2	134.935	145.345	128.46	113.51	108.33
WHL22.198472	1.755	2.47	285.69	171.68	106.095	73.07	65.38	59.88	35.895
WHL22.198511	678.885	674.98	145.685	82.445	128.145	226.84	227.615	237.045	229.095
WHL22.198512	0.115	0.26	0	0.095	0.06	0.06	0.17	0.155	0.105
WHL22.198668	162.235	174	61.815	241.25	247.36	309.27	324.195	290.365	295.595
WHL22.198686	154.78	156.665	196.245	137.515	81.705	57.395	53.09	50.135	39.185
WHL22.19877	270.905	253.97	37.57	48.09	66.91	72.95	76.38	77.67	74.335
WHL22.198914	0.115	0.255	0.11	0.095	0.14	0.04	0.02	0.045	0
WHL22.198933	11.77	5.98	107.435	302.745	768.11	967.485	1137.89	1462.74	1245.24
WHL22.198934	9.96	9.48	5.77	1.035	0.04	0.08	0.17	0.285	0.13
WHL22.198938	0.575	0.295	0.225	0.095	0	0	0	0.045	0.02
WHL22.199040	55.515	33.61	33.315	52.78	28.48	37.215	58.595	44.945	38.5
WHL22.19911	0.925	1.145	1.795	2.6	3.115	3.825	3.875	3.875	4.54
WHL22.199122	5.465	5.98	54.085	58.345	42.47	47.215	47.285	43.52	46.065
WHL22.199140	0.03	0	0	0.05	0.02	0.615	1.545	1.135	3.93
WHL22.199284	8.58	6.005	15.765	44.575	106.685	104.825	107.07	227.67	167.925
WHL22.199286	7.165	6.345	1.57	1.085	0.8	0.77	0.92	1.87	0.4
WHL22.199353	181.655	171.32	144.165	95.57	88.73	105.185	103.415	80.995	84.63
WHL22.199396	1.065	1.03	0.165	0.17	0.08	0.06	0.04	0.135	0.02
WHL22.19951	6.56	4.795	0.505	0.025	0	0	0.04	0	0
WHL22.199557	3.25	2.805	535.035	281.17	156.755	148.58	141.145	130.475	159.585
WHL22.199735	0.03	0	0.11	0.025	0.16	0.155	0.19	0.28	0.15
WHL22.199889	52.205	40.29	19.205	13.58	16.93	14.465	16.755	20.09	16.04
WHL22.199906	263.56	218.47	10.245	14.185	17.15	17.25	18.57	20.345	16.555
WHL22.199912	15.86	12.915	5.88	7.08	11.715	11.31	12.115	14.865	12.395
WHL22.199994	33.79	34.125	37.23	20.975	9.655	9.115	8.385	5.96	5.805
WHL22.199999	326.765	317.065	102.405	43.15	59.365	58.355	53.55	43.36	42.775
WHL22.200017	151.87	138.225	62.035	90.64	139.965	142.075	145.81	171.23	130.425
WHL22.200035	1.985	3.025	4.365	2.455	2.295	1.985	2.465	2	2.44
WHL22.200056	0.23	0.185	14.445	10.935	1.66	4.365	8.175	6.88	8.99
WHL22.200072	15.34	13.795	6.775	1.06	0.38	0.27	0.25	0.48	0.17
WHL22.200087	0.06	0.035	0.055	0.795	5.135	12.06	9.095	9.45	4.1
WHL22.200189	44.96	177.675	12.485	28.09	44.495	27.625	31.98	10.56	17.98
WHL22.200192	44.96	177.675	12.485	28.09	44.495	27.625	31.98	10.56	17.98
WHL22.200299	5.53	6.605	6.89	37.925	35.635	32.655	45.22	81.725	75.615
WHL22.20032	1.15	1.29	4.425	6.43	7.035	5.175	5.465	4.18	4.265
WHL22.200752	351.285	321.45	266.225	147.945	85.58	90.61	82.55	140.51	80.265
WHL22.200779	6.99	4.91	0.785	0.12	0.06	0.12	0.075	0.22	0.105
WHL22.201070	0.2	0.185	0.17	0.05	0.12	0.04	0.115	0.11	0.17
WHL22.201159	27.915	24.685	6.16	14.615	16.27	20.465	17.58	17.745	17.685
WHL22.201172	526.295	525.375	279.895	164.39	218.945	163.29	160.23	184.23	150.505
WHL22.201286	0.665	0.48	1.565	0.65	0.48	0.425	0.59	0.59	0.36
WHL22.201519	133.365	127.26	23.68	22.225	30.14	31.56	28.885	28.01	21.645
WHL22.201539	0.145	0.255	1.06	1.925	7.695	12.1	18.38	13.235	31.55
WHL22.201742	38.275	40.59	9.295	38.65	39.075	27.545	18.015	19.635	8.15
WHL22.201760	0	0	0	0	0	0.02	0.055	0.065	1.6
WHL22.201906	93.79	91.1	36.5	17.845	31.88	37.08	38.075	30.675	29.62
WHL22.202301	0.205	1.33	467.965	633.72	305.585	253.89	207.56	592.505	269.355
WHL22.202303	0	0	0.505	0.65	0.3	0	0	0.195	0
WHL22.202430	1.01	1.22	14.56	63.98	64.7	68.64	71.605	74.49	68.215
WHL22.202449	46.505	38.815	4.085	4.96	5.615	6.66	6.645	7.075	5.71
WHL22.202593	0.4	0.185	0	0.05	0.08	0	0.02	0.11	0.02
WHL22.202596	81.71	79.07	63.825	32.915	31.205	30.025	28.01	33.365	22.25
WHL22.202707	0.345	0.145	11.65	253.485	1149.26	1085.56	944.685	782.37	265.85
WHL22.202712	58.165	51.73	132.75	137.515	108.63	109.86	103.495	100.965	83.325
WHL22.202812	2.245	3.285	1.625	0.34	0.46	0.385	0.515	0.305	0.61
WHL22.202839	102.57	108.995	106.21	81.22	67.04	70.7	64.385	60.57	50.86
WHL22.203148	142.85	198.065	185.945	206.41	100.16	71.97	69.79	81.305	77.275
WHL22.203249	140.79	133.525	34.15	65.93	77.265	108.97	140.635	133.28	209.77
WHL22.203443	89.07	79.11	92.775	85.96	115.865	124.095	118.07	103.39	87.3
WHL22.203461	0	0	0.28	1.155	1.26	1.58	1.355	1.85	0.965
WHL22.203663	99.75	104.79	90.59	24.63	34.335	40.965	40.045	31.385	27.035
WHL22.203665	15.37	22.545	9.13	2.12	0.86	0.67	0.285	1.2	0.21
WHL22.203677	58.65	50.59	42.1	44.905	87.06	124.135	127.26	135.19	118.695
WHL22.203678	16.49	17.675	34.765	32.82	16.83	25.945	39.395	27.45	53.885
WHL22.203705	14.215	13.21	3.25	2.885	1.12	1.23	1.775	2.175	1.3
WHL22.203708	0	0	0	0.025	0	0	0.17	0.065	0.8
WHL22.203764	179.76	181.73	44.455	32.44	33.32	35.965	35.825	29.625	31.77
WHL22.203776	1.01	1.66	18.755	50.42	74.295	81.645	83.795	61.18	63.11
WHL22.204028	709.135	818.425	805.6	595.795	476.145	632.11	665.235	736.34	874.95
WHL22.204032	0.405	0.48	1.065	2.625	4.4	5.79	15.075	18.37	49.5
WHL22.20422	0.605	0.625	1.345	1.565	4.18	9.155	13.205	7.335	17.665
WHL22.20424	0.545	0.15	2.125	37.54	2.415	4.345	8.33	52.655	13.22
WHL22.204314	77.39	75.605	92.22	106.355	184.78	184.76	192.92	155.06	140.05
WHL22.20436	17.855	23.325	17.2	1.01	2.885	19.275	63.715	1.44	2
WHL22.204455	0	0	0	0.025	0.2	0.29	0.42	1.125	1.09
WHL22.20446	0.49	0.405	0.28	0.1	0.28	0.31	0.325	0.39	0.295
WHL22.204513	158.115	164.49	44.57	43.965	38.395	39.24	41.095	37.99	35.465
WHL22.204563	0	0.145	5.6	0.65	0.8	6.075	29.57	17.195	49.83
WHL22.204641	2.905	2.84	1.4	2.695	6.835	14.135	15.3	14.935	9.6
WHL22.204854	65.445	65.68	131.855	99.06	27.785	22.505	19.235	140.93	11.38
WHL22.204898	296.775	296.25	304.025	242.015	285.31	268.875	275.36	221.325	226.125
WHL22.205236	6.335	4.76	2.075	1.085	1.06	0.925	1.09	1.655	1.18
WHL22.205272	0.06	0.41	6.1	10.11	4.64	6.635	8.905	7.84	8.635
WHL22.205278	12.52	13.465	1.735	5.9	7.81	11.465	12.055	11.47	10.625
WHL22.205291	0.145	0.44	0.11	0.05	0.02	0.06	0.04	0.065	0.105
WHL22.205300	11.05	13.65	5.935	12.04	25.685	28.885	30.795	28.025	24.095
WHL22.205328	1.845	2.105	0.28	0.7	2.315	3.095	3.27	2.07	3.425
WHL22.205480	7.77	21.805	3326.8	2324.44	1210.8	1136.66	993.365	916.665	789.68
WHL22.205540	0.175	0.26	0	0	0	0	0	0	0
WHL22.205772	7.595	5.61	3.81	1.495	0.22	0.345	0.21	0.395	0.125
WHL22.205787	1.41	2.07	10.695	17.075	29.5	38.14	42.295	37.57	33.59
WHL22.205797	0	0	0	0.31	1.14	1.62	2.905	1.415	8.825
WHL22.205830	0	0	0	0.1	0.16	0.31	0.21	1.59	2.06
WHL22.205854	1.93	1.81	4.76	8.405	45.55	73.24	71.45	56.8	66.315
WHL22.206051	47.2	41.66	9.745	10.835	17.925	14.58	14.305	13.34	11.68
WHL22.206086	0.52	0.555	0.34	0.265	0.16	0.27	0.13	0.345	0.19
WHL22.206200	0.09	0.185	0.395	0.1	0.02	0	0	0.04	0
WHL22.206206	604	559.4	494.71	229.09	173.235	159.77	155.345	172.775	164.29
WHL22.206233	53.875	55.35	36.67	39.535	37.89	31.1	29.805	30.35	21.515
WHL22.206240	0.09	0.775	0.055	0.075	0.2	0.04	0.15	0.045	0.06
WHL22.206263	162.115	160.355	32.7	24.78	27.025	30.1	29.02	42.25	28.01
WHL22.206278	36.175	33.36	57.11	64.965	93.935	93.13	113.215	125.715	120.6
WHL22.206347	0	0	0.055	0.025	0.04	0.08	0.02	0.175	0
WHL22.20638	0.835	0.995	5.04	6.77	9.495	13.31	20.535	18.685	22.645
WHL22.206392	0.06	0	0.225	0.48	0.36	0.595	1.395	1.68	1.64
WHL22.206393	18.25	12.25	1.51	0.65	0.22	0.445	0.615	1.11	0.735
WHL22.206457	154.58	166.775	44.175	64.485	29.34	33.155	33.78	44.89	38.975
WHL22.206501	0.55	0.295	0.22	0.12	0.02	0.08	0	0	0
WHL22.206768	0.115	0	0	0.025	0.02	0	0.06	0.09	0.04
WHL22.206774	21.495	22.545	15.79	14.57	16.13	15.175	14.35	16.61	11.81
WHL22.206776	389.71	408.495	424.285	383.77	362.495	264.715	240.4	207.21	191.855
WHL22.206984	36.955	34.535	11.76	11.56	17.05	23.64	33.05	29.8	28.97
WHL22.207	48.09	43.48	28.095	30.76	40.76	28.395	27.305	16.665	29.92
WHL22.207181	38.22	41.655	7.56	7.87	10.575	9.41	7.335	9.49	5.415
WHL22.207186	14.105	18.56	32.81	24.61	15.71	14.73	14.56	18.585	14.185
WHL22.207242	2.275	5.755	5.71	0.65	1.16	0.465	0.515	0.46	0.4
WHL22.207247	19.65	15.05	10.135	9.585	7.815	8.905	6.285	7.53	7.71
WHL22.207254	113.855	109	40.2	23.625	29.14	32.075	34.24	36.585	29.02
WHL22.207281	31.085	28.555	5.6	3.59	3.8	5.595	7.435	11.035	6.53
WHL22.20732	2.73	1.775	31.075	57.55	54.505	41.815	28.81	28.765	21.82
WHL22.207530	75.805	72.83	26.315	8.57	11.255	13.445	11.025	14.625	10.08
WHL22.207542	136.305	142.28	26.76	26.195	76.67	82.455	83.875	87.315	98.44
WHL22.208053	0.09	0.18	2.8	10.21	25.64	34.91	46.75	46.61	40.885
WHL22.208092	0.03	0.035	0	0.145	1.4	4.06	6.42	54.185	11.37
WHL22.208122	2.62	2.77	6.155	5.37	23.145	61.22	67.555	71.18	59.295
WHL22.208145	4.205	4.13	11.03	11.965	15.215	16.615	16.39	16.525	14.535
WHL22.208154	45.015	42.43	2.41	3.345	11.295	17.735	21.665	17.24	27.775
WHL22.208155	11.22	195.93	67.665	20.945	16.065	71.17	30.515	32.77	5.33
WHL22.208209	123.38	125.045	59.74	41.055	42.71	45.66	44.075	52.85	37.775
WHL22.208329	8.025	1.515	6.835	0.335	0.28	0.385	0.21	0.2	3.01
WHL22.208335	1113.78	1130.28	1009.73	447.445	16.13	3.46	2.425	33.84	2
WHL22.208359	1078.15	1183.5	932.665	297.595	202.85	174.515	190.305	257.525	217.07
WHL22.208398	1.61	1.55	1.905	0.53	1.1	0.71	0.71	0.785	0.635
WHL22.208401	649.135	676.3	267.345	106.935	108.85	123.88	147.09	146.185	170.7
WHL22.20842	156.16	138.88	95.575	31.35	31.025	33.795	36.625	22.27	35.145
WHL22.20848	20	24.795	11.87	10.305	16.11	13.08	13.7	15.39	11.935
WHL22.208530	13.99	17.345	26.315	40.165	43.875	44.62	47.605	52.405	51.595
WHL22.208533	0.405	0.185	0.28	0.17	0.32	0.21	0.19	0.455	0.38
WHL22.208570	0.06	0	3.245	18.83	33.995	27	27.11	26.915	15.255
WHL22.208572	46.535	49.225	10.865	7.66	19.825	35.97	55.04	37.15	56.155
WHL22.208602	16.78	15.2	5.54	7.395	8.43	8.79	7.95	7.295	7.815
WHL22.208651	85.42	93.68	38.295	14.855	11.99	16.885	16.18	16.98	14.18
WHL22.208703	27.6	28.485	33.93	40.505	29.64	27.715	32.075	26.755	33.735
WHL22.20888	10.245	23.47	2277	2250.14	1404.02	1533.34	1540.4	1517.53	1175.32
WHL22.209052	0	19.3	172.12	52.64	3.28	1.945	1.545	31.805	1.195
WHL22.209178	0	0	0	2.43	3.68	1.1	0.915	0.635	0.315
WHL22.209181	9.875	9.04	1.01	16.64	23.045	19.425	26.19	17.985	23.045
WHL22.209258	68.495	66.825	10.805	11.2	16.17	20.29	17.58	21.075	18.86
WHL22.209264	31.485	35.61	27.83	7.25	10.935	12.385	14.92	11.495	12.44
WHL22.209283	61.56	48.26	3.475	7.25	7.575	7.39	11.04	8.31	7.285
WHL22.209297	0	0	0	0	0	0.02	0.08	0.02	0.505
WHL22.20935	138.11	127.11	84.825	31.595	30.98	31.99	29.785	33.215	25.375
WHL22.209513	21.995	0.07	0	0.075	0.02	0.02	0.02	0.02	0.04
WHL22.209526	3.08	3.03	13.94	20.56	25.86	31.565	30.205	23.02	30.945
WHL22.20957	53.7	51.21	41.265	27.445	29.62	32.79	33.64	27.3	26.595
WHL22.209671	0.175	0.07	0.055	0.75	2.435	2.655	7.01	3.26	11.47
WHL22.209862	87.005	86.38	21.385	61.28	104.09	114.185	115.68	96.475	62.565
WHL22.209887	0.03	0.035	0	0	0.72	1.615	0.915	0.285	0.04
WHL22.209889	92.09	90.77	130.395	118.275	162.82	164.995	173.72	170.54	148.285
WHL22.209937	196.88	198.955	74.795	26.78	46.25	52.64	57.68	53.815	56.95
WHL22.20996	64.925	68.995	10.69	8.865	7.895	8.25	5.75	10.21	6.7
WHL22.210043	0	0	0	0	0.08	0.17	0.385	0.105	0.13
WHL22.210061	10.445	7.565	4.925	3.59	5.035	4.965	6.115	5.53	6.11
WHL22.210062	5.01	3.36	0	0.025	0	0.02	0.055	0.02	0
WHL22.210117	0	0	0.055	0.05	1.46	6.58	10.81	4.94	8.945
WHL22.21014	169.89	175.415	36.06	7.87	10.975	17.08	18.475	24.365	16.575
WHL22.210157	217.34	223.525	473.395	190.63	102.715	138.135	171.58	160.7	193.295
WHL22.21017	0.78	1.07	0.28	0.025	0.02	0	0	0.065	0.02
WHL22.210225	0.375	0.18	0.11	0	0.12	0.08	0.055	0.11	0.04
WHL22.210535	231.88	229.725	126.535	127.91	51.645	54.335	43.98	43.765	43.45
WHL22.21056	5.065	4.87	2.185	2.65	1.895	3.27	5.865	31.71	10.565
WHL22.210681	0	0	0	0.1	0.02	0.04	0.02	1.415	0.19
WHL22.210736	60.7	58.445	79.34	148.205	113.39	102.995	100.875	94.38	108.28
WHL22.210819	0.03	0	2.35	2.72	4.94	4.035	1.985	2.545	0.63
WHL22.211220	3.74	4.355	5.265	1.25	1.755	4.14	2.195	1.655	2.845
WHL22.211329	79.115	79.075	87.905	86.73	103.55	83.92	79.285	77.955	52.02
WHL22.211896	126.025	115.3	56.945	68.795	48.645	49.28	47.25	49.335	54.615
WHL22.211906	19.685	11.77	7.84	8.185	15.97	20.775	19.05	15.495	16.805
WHL22.211908	144.16	147.555	170.96	63.235	20.44	18.805	15.955	32.185	14.12
WHL22.211956	28.145	28.305	5.32	11.15	14.555	17.195	21.95	19.465	22.385
WHL22.211966	0.32	0.7	4.87	12.255	13.21	22.485	15.725	21.61	16.005
WHL22.211972	2.45	1.365	3.475	10.015	16.65	18.58	20.52	23.095	22.565
WHL22.211986	141.455	152.98	59.69	38.94	48.495	51.815	50.13	47.345	46.56
WHL22.212013	0.06	0.295	3.525	1.395	7.055	15.39	17.405	10.84	15.045
WHL22.212052	0.345	0.295	0.395	0.385	0.34	0.115	0.405	0.195	0.42
WHL22.212068	0.435	8.93	23.285	8.74	0.8	0.73	0.915	6.665	1.24
WHL22.212077	47.86	49	11.145	18.59	31.665	46.315	46.08	44.5	31.765
WHL22.212082	26.675	32.73	51.4	49.675	43.66	49.985	36.93	41.32	34.625
WHL22.212106	8.115	5.465	3.08	6.985	5.615	6.345	7.185	19.135	9.54
WHL22.212124	29.93	26.68	117.975	50.515	56.165	49.14	38.555	38.925	22.685
WHL22.212125	641.35	582.395	585.145	461.215	213.02	163.46	149.975	167.195	113.315
WHL22.212152	0.26	0.07	0.225	0.24	0.2	0.285	0.115	0.35	0.02
WHL22.212188	52.35	43.69	10.415	12.16	23.205	23.485	21.015	23.45	20.215
WHL22.212189	99.17	98.485	73.35	55.335	53.8	56.99	53.265	59.025	40.21
WHL22.21219	98.255	97.52	36.005	10.79	11.255	19.31	22.62	21.23	20.215
WHL22.212250	157.225	144.01	142.045	79.8	41.535	30.83	25.505	42.495	26.635
WHL22.212258	4.285	4.095	4.87	3.78	5.995	8.08	8.425	5.85	7.73
WHL22.212267	23.425	21.29	26.375	23.02	21.765	24.06	21.055	18.175	19.945
WHL22.21228	53.555	53.39	112.035	73.27	56.76	52.92	47.345	60.12	52.955
WHL22.212280	0.145	0.11	0.395	0.485	0.84	0.23	0.495	0.505	0.465
WHL22.21231	0.03	0.11	2.295	0.385	0.78	0.27	0.21	1.265	0.38
WHL22.212326	0.52	0.255	0	0.075	0.48	0.54	2.29	1.48	7.27
WHL22.21242	0	0.07	0	0.265	0.32	0.655	0.935	0.675	0.17
WHL22.212622	4.89	5.495	1.345	3.11	14.05	20.87	21.035	14.915	22.63
WHL22.212623	5.325	9.04	3.14	10.615	23.125	32.75	36.24	35.295	37.84
WHL22.212743	107.525	106.23	99.825	90.805	109.97	137.615	148.71	135.575	146.81
WHL22.212749	47.485	45.975	3.525	5.225	6.755	6.52	6.63	6.545	5.045
WHL22.212771	0.81	0.295	0.165	0.075	0.08	0.345	0.38	0.57	0.76
WHL22.212879	5.35	6.865	103.135	91.96	85.925	71.505	50.61	49.125	36.945
WHL22.212917	0	0	0	0	0.02	0.02	0.02	0.09	0
WHL22.212918	40.52	36.565	23.965	9.775	9.235	8.885	9.34	12.24	7.705
WHL22.21293	7.225	6.9	20.83	13.53	25.04	29.065	35.25	27.1	31.745
WHL22.212952	0	0	0	0	0.04	0.135	0.305	0.26	0.21
WHL22.213048	7.105	6.015	3.36	1.995	5.04	10.325	11.54	6.945	9.755
WHL22.213049	153.575	151.065	89.47	15.985	11.595	12.715	11.865	18.065	10.42
WHL22.213136	16.75	18.82	2.295	0.865	2.395	12.485	22.87	17.135	22.57
WHL22.21318	67.6	60.365	12.595	5.805	7.475	8.08	9.19	11.32	6.935
WHL22.21326	11.51	8.745	1.455	5.445	6.855	9.31	9.955	8.995	8.11
WHL22.213311	32.64	28.635	22.115	15.99	10.915	11.175	12.665	10.035	11.72
WHL22.213347	29.76	25.385	9.18	6.505	6.755	6.46	7.3	4.785	6.865
WHL22.213359	29.96	35.825	45.465	68.79	75.81	108.05	109.815	123.925	168.03
WHL22.213375	0.29	0.145	0.445	0.12	0.66	0.56	0.84	0.955	0.8
WHL22.213412	7.395	7.825	17.975	68.24	97.04	86.15	66.1	85.525	55.36
WHL22.21342	41.645	34.17	23.85	8.02	7.455	7.215	5.83	6.905	5.76
WHL22.213433	38.74	32.33	3.025	3.895	10.055	1.675	5.085	1.93	5.17
WHL22.213440	1.18	0.48	0.225	0.215	0.34	0.15	0.155	0.24	0.085
WHL22.213443	0.95	0.85	0.395	0.34	0.26	0.25	0.305	0.305	0.13
WHL22.213467	447.985	484.87	237.61	58.32	51.825	79.165	101.64	111.975	79.77
WHL22.21350	1.01	2.03	2.07	0.435	1	0.885	0.995	1.345	1.135
WHL22.213534	22.505	21.77	25.535	15.53	35.455	33.56	31.505	30.15	29.985
WHL22.213632	0	0.035	0.225	0.075	0.08	0.04	0.325	0.04	0.15
WHL22.214118	0	0.11	0.445	0.14	0	0.02	0.155	0.61	0.255
WHL22.214259	11.19	19.225	9.855	4.165	3.94	3.595	3.23	3.85	3.38
WHL22.214260	36.03	42.54	30.46	20.395	37.13	35.62	32.765	35.985	24.31
WHL22.214395	0.12	0.035	0.73	1.11	1.835	1.94	2.235	4.635	4.225
WHL22.214422	310.79	310.055	58.12	40.335	32.88	28.81	39.99	60.855	79.855
WHL22.214595	30.075	26.495	8.68	6.745	10.515	12	13.47	11.755	14.895
WHL22.214632	0	0.185	4.31	1.155	1.22	1.115	1.74	1.44	0.965
WHL22.214637	0.205	0.185	0.335	0.12	0.26	0.04	0.02	0.045	0
WHL22.214641	6.965	10.035	63.155	31.615	37.695	55.53	88.57	65.995	60.645
WHL22.21483	2.935	59.55	4609.51	4177.42	3708.75	3051.01	2518.7	2016.11	1517.26
WHL22.21486	23.25	65.16	42.94	10.835	29.44	16.93	16.905	13.67	18.025
WHL22.214916	0	0	0.165	0.095	0.16	0.25	0.265	0.215	0.23
WHL22.214967	0	0	0	0.025	0	0	0.095	0.22	0.945
WHL22.215	129.105	117.66	98.82	95.79	96.24	99.44	117.095	125.555	117.345
WHL22.215060	0.26	0.735	2.745	8.405	35.935	54.72	77.57	68.305	74.05
WHL22.215134	52.295	62.285	25.135	9.535	12.99	17.655	18.21	14.39	21.435
WHL22.215148	0	0	0	0	0	6.785	10.2	29.985	53.725
WHL22.215205	0.03	0	0.17	2.695	6.355	12.525	22.065	13.125	36.86
WHL22.215254	180.22	175.565	61.03	33.88	42.39	44.125	49.14	46.855	35.97
WHL22.215259	204.48	213.75	146.645	105.925	122.11	133.42	142.79	167.085	169.585
WHL22.215283	0	0	0	0.025	0.22	0.27	0.325	0.26	0.295
WHL22.215378	316.49	302.81	223.505	115.51	131.055	144.635	151.715	180.585	142.04
WHL22.215386	12.46	4.835	54.415	176.38	440.975	617.955	755.85	900.895	879.415
WHL22.215389	0.285	0.185	9.915	18.69	75.71	74.43	89.43	80.26	63.6
WHL22.215391	297.47	304.805	82.305	87.91	92.985	89.36	89.545	90.245	59.565
WHL22.215397	15.54	18.265	5.095	1.42	3.9	13.255	21.495	10.53	24.705
WHL22.215423	0.03	0	0	0.36	0.66	3.02	8.595	7.75	10.295
WHL22.215428	67.315	67.745	17.915	17.24	21.03	25	26.92	24.925	23.825
WHL22.215445	109.705	83.355	20.27	30.125	31.335	31.93	29.575	24.115	22.69
WHL22.215530	3.17	3.1	7	45.39	83.03	110.23	125.14	81.305	115.25
WHL22.215692	1010.72	983.325	972.605	614.74	351.89	293.935	276.205	450.27	236.34
WHL22.215707	1.355	1.77	42.435	29.285	27.585	23.21	23.46	25.635	19.415
WHL22.215713	37.04	37.045	4.705	6.335	18.045	0.31	9.38	24.6	25.74
WHL22.215724	90.57	85.495	167.97	187.43	169.86	180.08	188.32	210.82	158.975
WHL22.215733	0.375	0.15	0.95	6.07	5.95	3.27	5.87	6.615	3.505
WHL22.215802	0	0	0.11	0.075	0.08	0.175	0.4	0.11	0.06
WHL22.21590	2.36	1.77	6.55	2.045	6.035	5.4	6	5.75	11.47
WHL22.21598	0.09	0.035	0.055	0.14	0.16	1.9	7.03	4.065	7.1
WHL22.216263	3.57	3.985	1.065	0.19	0.18	0.23	0.325	0.285	0.42
WHL22.216374	0.75	0.37	1.285	1.01	2.135	3.445	5.04	7.905	6.93
WHL22.216388	0.03	0.035	2.185	1.28	2.415	3.23	2.315	2.155	1.365
WHL22.216465	0.06	0.07	0	0.7	2.275	2.96	2.94	1.7	1.97
WHL22.2167	398.08	387.655	158	64.46	91.14	111.555	109.565	110.02	77.055
WHL22.216878	0	0	0.055	0.315	2.395	2.345	1.95	0.74	0.38
WHL22.216908	0	0.075	0	0	0.12	0.15	0.095	0.24	0.125
WHL22.216998	56.235	57.12	44.175	31.52	38.035	39.2	37.255	27.42	33.01
WHL22.217164	135.785	139.735	103.41	146.185	161.455	181.565	205.515	214.37	222.39
WHL22.21737	199.995	197.33	15.17	20.515	12.27	15.715	16.85	32.455	16.35
WHL22.21747	0.03	0.07	0	0	0	0.06	0.02	0.135	0.02
WHL22.21762	0	0	0.055	0.36	5	3.83	2.485	3.64	0.885
WHL22.21770	0.81	0.96	1.455	1.155	0.9	0.29	0.135	0.435	0.19
WHL22.217788	0.2	0.075	0.11	5.105	4.28	4.095	10.355	43.955	6.675
WHL22.2178	5.845	15.31	5027.98	21057.4	16736.7	10456.9	8003.34	9156.08	4958.81
WHL22.21780	295.6	299.36	220.04	94.175	58.22	53.39	44.48	61.28	28.085
WHL22.217966	36.525	29.85	17.86	11.795	4.36	5.54	6.995	8.06	4.24
WHL22.217970	167.07	172.195	104.87	44.835	50.75	47.815	50.17	56.71	47.97
WHL22.2181	45.3	39.995	97.315	131.69	60.525	51.66	45.395	48.52	43.135
WHL22.218106	0	0.255	4.535	6.165	7.815	12.89	12.035	14.91	11.21
WHL22.218132	0	0	0.395	0.31	0.16	0.23	0.71	3.375	15.055
WHL22.218164	2.42	2.25	1.905	1.565	1.06	1.04	0.475	0.48	0.48
WHL22.21837	2.13	1.92	6.155	6.795	7.635	7.1	6.76	6.47	6.51
WHL22.218450	0.09	0.22	0.22	0.985	4.64	1.75	1.815	9.705	7.855
WHL22.218454	1.7	1.845	0.11	0.025	0.02	0.04	0.055	0.02	0
WHL22.218459	192.475	194.34	80.955	5.775	0.48	0.155	0.285	2.11	0.17
WHL22.218616	29.73	30.445	36.73	34.89	49.23	46.17	41.65	34.11	33.92
WHL22.218676	23.05	19.04	25.925	25.02	21.405	20.135	18.895	19.525	16.45
WHL22.218681	365.935	379.935	170.255	148.98	129.13	124.8	121.205	134.555	106.34
WHL22.219133	153.37	162.13	79.05	50.085	43.815	51.83	53.535	54.795	60.81
WHL22.219139	1.585	0.96	0.615	0.12	0.02	0.06	0.095	0.155	0.04
WHL22.219142	6.13	4.615	24.805	12.595	7.335	2.515	1.89	6.055	2.205
WHL22.219160	25.955	24.79	84.995	9.15	2.36	0.94	0.92	3.095	0.65
WHL22.21920	24.09	23.765	16.295	16.18	14.775	13.93	13.66	12.87	9.96
WHL22.219241	0.89	0.85	0.73	0.625	1.1	0.52	0.595	0.805	3.025
WHL22.219243	0.46	0.37	0.335	0.165	0.1	0.155	0.115	0.395	0.19
WHL22.219380	63.575	55.535	58.175	33.135	23.705	23.485	21.32	21.92	19.45
WHL22.219385	10.42	12.25	8.735	5.275	11.135	9.04	8.54	8.185	8.74
WHL22.219476	11.485	9.41	0.67	0.77	1.24	1.695	1.7	1.785	1.62
WHL22.219486	3.97	5.575	60.635	72.55	98.015	153.805	200.375	114.735	213.655
WHL22.21955	209.72	212.46	118.585	38.31	52.165	62.875	70.69	57.49	68.835
WHL22.21965	26.275	27.635	131.575	255.985	204.03	162.38	139.91	137.76	111.13
WHL22.219713	2.045	1.03	0.56	0.41	0.24	0.31	0.38	0.61	0.48
WHL22.219931	33.7	23.795	20.21	53.84	87.96	114.935	124.09	116.27	126.865
WHL22.219937	0.29	1.105	15.23	31.69	138.49	138.715	104.64	85.445	67.87
WHL22.220020	101.01	96.52	35.89	19.89	24.245	24.985	25.295	30.13	18.25
WHL22.220192	9.295	7.6	107.155	87.5	64.815	66.465	67.425	62.435	55.665
WHL22.220204	6.215	3.17	1.01	0.725	0.38	0.445	0.42	0.76	0.545
WHL22.220333	0.06	0	0.055	0.025	0.02	0	0.115	0.085	0.105
WHL22.220380	0	0.075	1.29	0.46	2.875	12.675	15.155	9.75	31.475
WHL22.220398	45.56	41.18	59.295	34.025	20.97	26.29	31.41	33.24	35.695
WHL22.220407	7.685	9.11	2.795	1.035	0.6	0.155	0.11	0.915	0.23
WHL22.220518	47.2	34.65	13.72	11.775	19.93	22.02	23.115	21.625	22.46
WHL22.22055	0.115	0.035	0.11	0.025	0.14	4.175	4.625	21.05	12.755
WHL22.220584	93.415	72.36	141.195	32.145	17.33	17.83	14.9	20.575	11.91
WHL22.220723	3.05	3.655	2.52	1.01	2.615	5.365	5.655	4.745	1.615
WHL22.220731	0.115	0.035	0.055	0.335	1.16	3.23	3.92	4.245	4.975
WHL22.220830	36.465	41.105	52.185	76.185	37.555	36.505	26.555	33	22.605
WHL22.220831	71.72	62.915	53.575	16.47	29.64	41.025	36.89	40.84	34.515
WHL22.220905	205.775	216.81	538.4	215.725	195.015	99.91	117.075	208.33	94.685
WHL22.220967	0.145	0.035	0	0.215	0.06	0.69	6.285	6.135	5.97
WHL22.220974	13.96	15.2	8.845	9.56	23.665	22.845	21.57	19.115	20.44
WHL22.22103	1.5	1.18	1.625	0.965	7.135	14.79	31.985	75.86	124.69
WHL22.221102	30.22	32.21	29.28	26.825	33.12	31.98	33.51	42.6	22.97
WHL22.221161	253.945	221.755	176.09	91.815	92.33	80.685	79.455	108.62	74.07
WHL22.221179	0.75	1.035	31.13	18.925	12.15	16.385	16.3	23.705	20.17
WHL22.221180	0.2	0.48	31.69	29.935	13.97	12.925	12.17	16.325	13.45
WHL22.221190	0.2	0.405	0.055	0.025	0.04	0.06	0.02	0.065	0.04
WHL22.221196	44.465	37.71	18.2	17.865	20.81	19.73	17.46	17.785	18.28
WHL22.221374	0	0	0.67	0.915	0.28	0.37	0.555	0.94	0.755
WHL22.221377	21.875	22.025	23.795	29.185	46.73	50.93	47.745	28.76	28.15
WHL22.22147	86.745	79.41	169.2	221.34	208.56	181.99	170.495	188.125	138.99
WHL22.221501	0.03	0.035	14.95	18.42	6.735	3.675	1.49	6.03	0.65
WHL22.221540	2.59	2.77	1.57	12.57	18.585	24.315	44.555	45.045	46.065
WHL22.221547	269.175	194.08	26.825	29.52	28.445	20.865	21.915	40.33	24.225
WHL22.221549	197.975	171.835	104.925	208.43	212.34	237.16	247.445	161.96	190.56
WHL22.221573	3.97	3.505	16.8	17.46	10.035	8.985	7.7	6.725	7.415
WHL22.221582	135.755	124.095	32.305	35.565	52.805	65.705	70.265	64.05	64.98
WHL22.221654	0	0	0	0	0.02	0.15	0.06	0.085	0.08
WHL22.221810	53.475	55.455	38.97	41.15	74.04	72.64	74.26	91.86	52.8
WHL22.221868	0.35	0	0	0.025	0.04	0.12	0.04	0.065	0.105
WHL22.221882	222.925	320.93	98.755	38.435	43.945	11.885	54.375	31.21	48.715
WHL22.22192	88.185	80.255	170.21	222.685	210.375	183.335	171.77	190.15	139.935
WHL22.221922	191.905	211.645	150.56	113.365	114.705	115.98	125.54	132.6	125.45
WHL22.221946	0.115	0	0.11	0.05	0.1	0.04	0.02	0.11	0.04
WHL22.22196	80.755	79.33	58.51	13.99	20.42	22.465	22.68	23.515	19.305
WHL22.222014	0.115	0.075	62.01	0.215	0.12	0.06	0.13	0.065	0.105
WHL22.222054	136.555	144.76	108.745	64.485	48.175	51.63	51.565	57.1	55.8
WHL22.222056	0	0.075	0.56	0.58	0.2	0.175	0.325	0.15	0.13
WHL22.222145	0.06	0.07	0	0	0.1	0.48	0.305	0.52	0.57
WHL22.222161	5.93	5.2	183.66	242.845	111.85	92.19	136.31	276.34	196.115
WHL22.22226	0.06	0.075	0.055	0.22	5.915	15.405	31.58	47.965	31.765
WHL22.222341	54.105	52.285	46.925	11.025	4.48	4.33	4.185	5.375	3.34
WHL22.222342	180.245	157.995	116.86	58.08	44.21	35.43	31.45	34.33	26.45
WHL22.222352	7.455	6.305	12.82	9.465	7.12	7.465	4.375	6.71	3.53
WHL22.222390	0.145	0	0.11	0	0.04	0.04	0.04	0.065	0.085
WHL22.222445	0.375	0.59	0.055	0.05	0.06	0.06	0.075	0.04	0.02
WHL22.222448	188.735	193.635	39.865	36.91	31.135	29.68	31.315	35.97	33.215
WHL22.222453	187.815	181.24	50.835	39.945	53.9	64.235	73.345	74.49	64.685
WHL22.222457	42.22	40.73	14.33	10.305	14.31	17	20.575	16.65	16.265
WHL22.222459	299.795	269.455	370.2	248.015	154.285	137.46	133.16	96.17	92.565
WHL22.22247	0	0	0	0	0	0	0.21	0.04	0.61
WHL22.22250	19.685	18.08	2.52	1.54	1.895	5.04	10.065	24.115	22.49
WHL22.22271	0.95	0.925	1.735	3.42	4.44	4.845	4.53	4.35	4.415
WHL22.222778	1.87	4.025	0.165	0.385	0.84	0.79	1.205	1.045	1.535
WHL22.22280	1.44	1.07	5.82	30.795	65.94	121.13	133.965	105.585	121.68
WHL22.222943	175.5	161.35	8.12	18.375	35.075	49.74	55.29	54.665	77.09
WHL22.222972	1.125	0.85	0.22	2.795	17.41	27.215	43.81	41.825	98.755
WHL22.22302	0.23	0.335	0.055	0	0	0	0.02	0.04	0
WHL22.22305	0.175	0.11	0	0	0	0.02	0.02	0.04	0.04
WHL22.223110	173.89	186.735	52.85	20.755	18.145	14.195	14.215	18.375	12.095
WHL22.22317	0.09	0.07	77.155	175.44	145.89	92.855	61.805	142.515	20.585
WHL22.223177	0.4	0.405	13.885	25.21	78.91	242.585	259.295	192.22	112.035
WHL22.223192	234.27	226.08	111.31	91.405	130.2	180.18	187.04	164.735	187.22
WHL22.223206	17.985	20.22	29.23	14.085	14.625	18.985	22.545	19.235	21
WHL22.223224	0.72	0.63	0.675	0.65	0.26	21.4	4.2	0.175	3.465
WHL22.223228	82.165	82.575	17.07	38.84	46.65	53.525	48.815	51.355	37.895
WHL22.223249	0.695	0.515	0.055	0.075	0.08	0.04	0.04	0.02	0
WHL22.223252	145.77	166.075	100.72	41.465	39.895	35.58	25.885	31.63	20.885
WHL22.223255	0.315	0.225	1.12	4.575	12.47	24.385	39.395	27.13	51.505
WHL22.223267	0.03	0.075	0.22	1.735	9.815	23.865	40.695	34.62	60.66
WHL22.223293	0	0.035	0	0	0.2	0.79	2.005	1.085	4.305
WHL22.223317	20	19.295	24.8	23.665	14.155	11.485	7.815	9.965	6.895
WHL22.223320	0.145	0.11	0.28	0.215	0.12	0.1	0.04	0.045	0.085
WHL22.223344	31.88	23.73	3.02	0.435	1.58	3.545	0.46	15.815	9.715
WHL22.223347	174.375	183.195	126.54	51.095	29.14	25.005	26.325	25.93	22.085
WHL22.223356	195.27	185.89	171.505	110.715	89.325	76.41	71.645	58.82	62.3
WHL22.223369	57.415	59.265	125.64	42.595	21.685	27.985	26.63	23.965	30.065
WHL22.223374	2.88	1.73	1.12	0.145	0.46	0.33	0.38	0.305	0.38
WHL22.223393	25.845	29.19	31.63	23.77	3.94	2.595	2.695	6.38	2.855
WHL22.223445	72.065	67.93	9.24	7.155	9.655	9.56	10.965	14.26	7.9
WHL22.223462	0.92	0.815	1.23	1.18	0.64	0.675	0.725	4.285	0.48
WHL22.2236	13.44	11.065	1.01	2.745	4.38	4.23	7.93	5.03	24.92
WHL22.223606	48.55	23.725	48.38	128.27	314.575	512.41	635.85	635.81	781.645
WHL22.223607	1.065	0.735	0.22	0.265	0.52	0.615	0.57	0.87	0.775
WHL22.223650	1.64	1.51	0.67	0.77	1.26	2.325	2.37	1.895	1.76
WHL22.223865	0	0	0	0	0	0.195	1.49	0.695	4.01
WHL22.223871	18.88	21.73	44.955	48.14	48.69	62.045	71.415	76.37	63.49
WHL22.223883	307.34	371.605	482.235	561.865	596.265	585.42	579.03	643.6	604.185
WHL22.223910	59.32	64.865	80.175	43.32	42.41	40.41	40.045	45.895	31.2
WHL22.223917	359.14	376.32	389.69	337.16	343.495	440.22	483.28	502.49	422.475
WHL22.223927	3.195	1.88	0.505	0.36	0.5	0.405	0.4	0.545	0.505
WHL22.223944	4.315	2.395	2.91	0.865	0.46	0.23	0.21	0.37	0.235
WHL22.223950	1.93	1.4	1.565	0.51	0.2	0.155	0.15	0.175	0.105
WHL22.223957	5.15	4.505	0.445	1.565	2.72	4.365	5.58	4.525	4.18
WHL22.223963	40.205	39.555	46.635	40.74	29.34	28	26.98	33.26	15.675
WHL22.224062	214.58	229.355	117.905	63.645	68.615	63.56	61.9	64.065	48.195
WHL22.22407	14.3	13.175	1.795	5.03	5.775	5.56	6.035	7.01	4.685
WHL22.224086	12.835	12.69	17.415	14.35	37.62	44.05	46.98	32.77	31.83
WHL22.224129	34.195	27.045	5.6	2.19	5.17	10.055	14.06	13.32	8.595
WHL22.224135	0.49	0.405	0.055	0.385	0.08	0.155	0.11	0.155	0.02
WHL22.224155	71.66	79.59	86.78	64.125	74.865	84.765	67.135	70.8	55.66
WHL22.224178	22.42	20.22	8.345	11.08	18.15	19.18	17.655	13.675	16.785
WHL22.224179	0	0	0	0	0.12	0	0	0	0
WHL22.224201	294.71	213.085	192.315	275.395	534.35	812.59	970.19	1113.45	1371.51
WHL22.224203	55.085	54.8	23.46	65.38	104.735	119.905	155.785	139.11	119.325
WHL22.224206	0.29	0.07	0.055	0.12	0.14	0.115	0.25	0.475	0.315
WHL22.224218	409.195	411.295	310.965	113.92	95.88	90.53	81.215	87.87	64.3
WHL22.224222	124.815	128.08	61.195	108.375	92.18	102.13	128.29	150.6	152.745
WHL22.224278	153.65	144.525	124.35	74.285	47.585	38	37.33	36.375	26.39
WHL22.224282	83.805	92.135	102.01	51.6	44.39	50.39	46.54	47.21	40.55
WHL22.224302	0.17	0.11	1.01	2.77	1.915	2.655	2.655	2.61	3.76
WHL22.224303	41.555	40.255	10.465	13	18.965	24.545	27.7	21.37	29.455
WHL22.224315	10.445	12.25	81.525	44.715	29.36	32.155	37.045	63.825	46.58
WHL22.224354	0.06	0.665	46.075	43.18	19.325	16.445	10.47	34.5	8.975
WHL22.224436	12.545	12.66	9.405	13.725	10.035	9.04	8.615	10.47	9.5
WHL22.224438	0	0.22	12.875	28.895	35.395	44.505	43.215	44.78	59.495
WHL22.224445	117.71	117.445	28.05	84.805	105.755	109.795	132.745	140.035	137.54
WHL22.224478	45.56	39.885	20.545	24.68	25.14	26.425	26.175	24.295	20.13
WHL22.224487	16.23	16.57	5.88	6.67	7.915	14.02	16.735	16.77	16.645
WHL22.224514	38.765	33.135	16.845	18.425	12.97	13.635	10.62	8.965	10.505
WHL22.224523	0.23	0.035	0.055	0	0.04	0.06	0.02	0.02	0
WHL22.224553	85.075	73.835	8.115	8.285	8.54	11.23	10.545	9.25	12.69
WHL22.224579	1.01	1.4	0.055	0.915	17.33	24.005	29.155	24.575	24.395
WHL22.224640	107.13	189.035	26.395	7.565	0.44	0.06	9.625	11.145	20.33
WHL22.224645	0.35	0.335	0.395	1.18	0.24	0.94	2.22	55.915	4.515
WHL22.224727	0.29	0.145	0	0	0	0	0	0	0
WHL22.224752	9.295	8.89	2.405	3.95	8.195	8.965	8.445	11.7	6.075
WHL22.224760	8.29	7.195	3.75	10.595	12.11	18.025	18.09	13.215	17.12
WHL22.224766	28.55	32.285	146.695	32.1	15.41	16.37	17.255	25.165	20.34
WHL22.224767	34.335	38.335	68.08	46.33	32.285	39.35	35.8	36.51	40.97
WHL22.224774	0.29	0.37	0.335	0.075	0.04	0.04	0.02	0.135	0
WHL22.224777	0	0.15	7.45	1.785	1.3	3.885	17.135	8.275	31.47
WHL22.224782	46.16	44.76	151.68	85.56	109.665	107.15	116.31	140.12	235.125
WHL22.224810	62.8	66.71	231.075	150.665	146.01	185.01	186.96	149.275	163.135
WHL22.224817	51.455	47.965	39.195	41.465	57.8	59.915	64.575	54.78	48.73
WHL22.224824	0	0.145	0.73	5.08	10.415	4.675	2.73	6.835	7.81
WHL22.224833	3.055	3.47	111.415	300.465	208.61	136.715	86.24	78.61	77.01
WHL22.224856	275.275	287.065	280.845	243.68	167.11	177.84	166.08	136.905	126.325
WHL22.224969	0.605	0.365	0.225	0.05	0.04	0.04	0.225	0.765	0.42
WHL22.225202	0	0	0	0.025	0.1	0.02	0.08	0.02	0.065
WHL22.225212	156.765	114.27	83.25	65.11	44.89	41.99	38.67	36.75	40.325
WHL22.225242	0.2	0.185	0.11	0.05	0.06	0.095	0.04	0.155	0.02
WHL22.225252	4.69	4.02	28.165	25.285	27.42	30.385	29.745	31.175	24.985
WHL22.225384	0.03	0.035	0.17	0.145	0.26	0.56	0.21	0.5	0.355
WHL22.225613	0	0	0.225	0.14	0.56	0.325	0.23	0.825	0.04
WHL22.22569	188.39	212.275	130.9	51.46	49.81	42.83	33.685	54.665	34.715
WHL22.22570	58.965	51.22	10.75	7.155	15.27	16.635	16.66	20	14.75
WHL22.225876	544.22	510.455	476.4	289.82	237.01	185.945	181.975	263.73	136.885
WHL22.225915	2.79	1.955	1.34	0.505	0.56	0.29	0.515	0.52	0.48
WHL22.22601	85.675	84.975	24.97	30.07	39.035	38.605	41.57	39.415	34.44
WHL22.226061	23.225	23.945	40.37	35.73	19.845	19.43	19.485	21.635	13.15
WHL22.226065	23.235	9.055	0.22	0.05	0.1	0.095	0.21	0.09	0.085
WHL22.226105	5.84	13.91	16.965	4.525	6.815	2.77	2.39	2.655	3.34
[truncated: 9,679 more rows]

## Sheet: README
Supplemental Table S6: CAGE-seq expression data (CPM) of annotated genes.
