# Supplementary material for: Global patterns of enhancer activity during sea urchin embryogenesis assessed by eRNA profiling
Source: HighWire-hosted journal article supplement (doi:10.1101/gr.275684.121), 2021-07-30
Supplement: Supplemental_Table_S7.xlsx [file Supplemental_Table_S7.xlsx]

## Sheet: eRNA overlap by fraction
	Fraction of eRNA required to overlap with secondary feature
	1 nt	0.25	0.5	1
ATAC-seq (sites selectively open in PMCs)	156	154	147	123
ATAC-seq reference peak set	14157	13630	12878	11165
DNase-seq (sites selectively open in PMCs)	566	556	544	486
DNase-seq reference peak set	11309	10824	10196	8822
Alx1 ChIP-seq	357	312	213	33

## Sheet: README
Supplemental Table S7: Effects of changing overlap stringency on co-localization of genomic features
