# Supplementary material for: Global patterns of enhancer activity during sea urchin embryogenesis assessed by eRNA profiling
Source: HighWire-hosted journal article supplement (doi:10.1101/gr.275684.121), 2021-07-30
Supplement: Supplemental_Table_S8.xlsx [file Supplemental_Table_S8.xlsx]

## Sheet: Sheet1
Gene	SPU ID	WHL ID	Gene position	Enhancer position	Sequence
Sp-vegfr10	SPU_000310	WHL22.240520	Scaffold1985:181585-255339	Scaffold1985:181118-181460	AATGTTTATGAGTCAGTCATTATTCGCGAAATCCTGTTATTTTGCCACCCGCTGCTGGGAACGCGCACGGCACGAGAACCGCACGCTCCTCAGCTCAAGAAAACTTTGAGATGATTGACTTAATATATGCCCCGCCCACATTTGACGCTACAAGTACTTTTTGGACTCCTCTTTCAAAAAGTTTGGAACTAAATTGTAAGATCTTTCTCGACCAATTACAAAAAAAAACGTAACTTATGAACCAATATAATAATTTTCAAATATATCTGAAAATGTTATGCAGTAAAATAATAATTCTTGCATTTCAAATGGTCTAGAAATGATATAATATTGCTAATCGAC
SP-clectin	SPU_007882	WHL22.728834	Scaffold878:201801-223749	Scaffold878:194028-194322	GAACCCGGCGTGTTTATTTATGTAGCGGAAAACAAACACGTTCTCCTTTTTTGTCAAGTAATGACAAGATTACTTAGCATGAAAATAATGGTTAACAAACCAGTGATAAATGATGACAAACGATTTATAAAAGGAATCAAATAACAAAAGAGGTTTAATAAATCAACAAAACCTGTTCAGACCTGCCTTACATTATCGATAGTTATGATCGTTATTTATCTCTTTTACCTTAAGTAATCAATTAGTGTTGTATATGATGTACACGATATACACGATCGAGTATATTGTTGAGTA
Sp-sm29	SPU_005990	WHL22.39470	Scaffold1119:167469-178375	Scaffold1119:169493-169889	GGGGTCGACGAAAAAACAAATCACATATTCCTTAACAAAAAGAGGACATTGGCATTTTCCGGTTGAATTATCACCATAAGAACATGTTCACACATTTGTGAAGGATTTGTTAAACCTATATCCTGTTAAAGAGTCTTGCGCGAAGTCGTCAAGTAACATTTTTTCAGTCACTAAAAGCGTGAATATTGGGTGAAGATTCTTTCTAGAAGCAGAACGATTTCGCCGTTAAGGTAATGGGTTTCAAATAATATTAAATTAACCTAACATTAGGTAAAGAGGGCACATGCAATTTCGTTTGGTGAAATAATCATCAATTTAGCGTTTATTCAACCCAATTCGGGGATGTTTATTTTACATTTATTTTTTTTACAACATTGTGTAGAAATTTATTTAGCG
Sp-p16	SPU_018408	WHL22.239394/WHL22.239481	Scaffold198:284768-289426/Scaffold198:296789-300768	Scaffold198:294374-294548	TGCCAGTCACCCACTCCAGAACCCACTAGACAGGACGTTACGATACGTCTGAAGGGGAAGGGCATCACAGCCACGACACTTCTTAATTGTTATTTCCTAAATCTAGATGCAGATAATTACAGGAAGACGATTCCCTGTTGTAAATAAACGCAATGCCATGGTTGTTTGGCCTAC
Sp-nk7	SPU_022573	WHL22.567485	Scaffold520:486732-510139	Scaffold520:512839-513272	GTGTGGGACCGAAGAAGAAGAAGAGCTCGCAGGGCCACAAAGAGCAGATATGGGTCACGCTAGAACAACAGCCACCCAGTTAAGTGGATAACCCTTGCCAGAAATAAAAACAGTCATAATGGCCGCTCTGTGCGTGCTATATTTTTTAACTTTCATGGTACCAACGTCTCCGCAGAGGCTAAAAAAAGAGAAAAGAGAGGAGCTTTTTTGCTCATCATCAGGGAGGTGGAGGCTATGATTAACCCAAGACAAAGGGTCAACAGTTCTTGGAAATACATTGAATCTTCAATAATCATGATAATAATATAGAGTCTTCTTATCTGTACGCCTCCCTCTCACCCCCTCTCGCTCTGTCTCTGTTGTTTCTTTCTGTCACACACACACAGACACACCCACACT…
Sp-mitf	SPU_008175	WHL22.677144	Scaffold743:168576-227785	Scaffold743:206992-207569	TGTTTCACTAATTTTAATCCAACATGTATTTATATGTAGCATCTACCGGTAATATAAAAGCATGTGTACTTGTTGACATGTTTATTATATATATATACCAGTACTTCGAATCTGATCTTAAAAGGTCGCTGTATAGGTTACAATCGTCAGTGAATGGGGGTGCCAATTTGGGGATGATCATATTACCCAGGACCAGGTGCGATTCAAGACTGTCAGAATAGATCATTACATCCATGTACCGTCGGTCGGCCGGGTGGGATCCAAATTGAAAGCCTGATTAAAAGAAATTTGTCATACGGGTAGTTGCCGACTTCCTGTTTAATTTGTGCGATATTGACTTGTGTAACTCAGTGATTAGATCGCTGCAGGAAGCACACTTGCTGTGTACTGTTGTGTGCT…
Sp-jun	SPU_003102	WHL22.318085	Scaffold2444:119491-122483	Scaffold2444:124662-125218	TTAATCGTGGTCAGACTTATAGATCTGTTCTTTTACTCTTTTTGTTTTTTCTTAAACACTTTGAAAAAGAAAGTTGTTTGCTGCAAACTCCTGTCTGCTTAGGAACCTATTTATTCAATTGTGGTTAGACTTATAGATCTGTTCTTTTACTCTGTTTGTTGCATGTATGACAAGCAGTATACATATTGACAATAGGGGATGGAGGGTTTGTCGATTCAGTGCTATTTTGGGTTGTAATTTCATCATAAGTTGTTTGTTGTTTCTTGGAAGAAGGGGGTTTTGAGTACTAATTGTTTTGATTGAAGTAGATTTGCAAGATAAAAATGGATGAGTCAGTAAGTGGTTTAAAAATAAAAATCTTCCCCAGCACAAAGACAAAAACAAGTATTGTCCAATAAG…
Sp-jun	SPU_003102	WHL22.318085	Scaffold2444:119491-122483	Scaffold2444:128312-128489	TGAGCTTAGCTAGCCAACAAAACGTAGTGTGAAACCCTGTTGATCTGTGTCCATGTAGGGTGCTTGGAAGAGGCTGATTCATGCAGGAGTTCTGCAGGAAATCAACACATCCTGTTCATACGAGCAAGGAGAGAAACAATCCATCAGCGCAAGACCCTAATTGTATTCCATTGAACC
Sp-jun	SPU_003102	WHL22.318085	Scaffold2444:119491-122483	Scaffold2444:136194-136711	CAAGACCTTTGTCAATTTCTTTCGCAGAGTGAAGCCGCAACAATCACTGCCCGGAAGCCATGTGTTGTCACTTAGCGCCAGCTGACCTAACTCGCAAGTCCCCGCTGACGGAGTACAGATTCTCCTGCGCGTGTTGTTCCTCGGCTCGGTCCAGGGGTAGCCTCATCAGATCCAATTTCCTCTGTGGCCATTGAGGTAACAGAGGTACCCCTCCGTCTTTTCATCTGCAGCGCTCCCTGAGAGGAGAGCCATAGAGAGAGGGAGAGAAGGCACGAGAGAAGGAGAGAGGGGGAGAGAGAGGGGTAAAGGAGACAAGAATGAGGCGTATTAAGTCCTTCCCCTTCCCCGTAATTTGCCAAGCCACGTCAGGCTGACTCACATCCCGTCCATTAAACCACA…
Sp-stk35L	SPU_003710	WHL22.600654	Scaffold5796:24357-27490	Scaffold5796:28303-28866	AGAAAAGACTTGGCAGGGGAGCAAACTAGCATTTCCTTGCGCAGAAAATGACATTGCTACGAAATGGGGGTAACGGATAAGGATACCACTAAGGCATGCAAGGAGGACTCGGTTACCTGGAAGGGGTTCGCTTTCTAACTATTCCATCATTTTGGACGGTAACTTGGGAAATGAATGATTTCCACATCGCTCCCTAGCTACCTTACATACTTTACGATGGTAATTGATGAGCTGTATTTAGTTCCGTTGCAAAAATGAGATGACGCTACCTACCGTAGAACGTCATTAGTCTATCCTGCTTATTATGCTCTTCTCAAAATAATTTATGGTTTATACAGTGTGGTGTATTTATAACAAAAATCATTTTAAAACCACCCTCCTCCAAACTTGTTCTTATTT…
Sp-pks1	SPU_002895	WHL22.202707	Scaffold174:166141-184094	Scaffold174:190972-191109	ATCACGAGAAAGCGGACTGAGGAAATCCCCGCTTTCGGAAGTCATAACAACGAGGCCCATGCAGCGCACACCATTTATCATGATCCGACTTTCTTGGAGAAGGACAAGCTAATTCCGTCCCAAATCGCAGTGACGTC
Sp-pks1	SPU_002895	WHL22.202707	Scaffold174:166141-184094	Scaffold174:192881-193344	GAATCATATAAATGGGATTCAGTGCACAAATTCATTGAAGTACCCTTCTAATTCTTCTTTGACATATACATGTATCTATTTATATTTTATGTGAAAGTTGACAAACCTCCATTGAGACAGGAAAGGAAACAGCGTTTTTCAAAGCTTTCTGGTGGTAGTATAATACTTTCAAGGAGGTTTTTTTTCCGCCCGCAACTCTCATCACTACCGGACGTCAGTGCTGAGTTAAGTTACCCGTAGTTAATAAAAGAAATAACCGACAGTTGATGCTGACAGCAGGGGCCCAGGATATTTCTGGTTTCTACTAATTTGTATAACTTGCATTCCTCCACGCCGGGGGAACGTGTTACTATAATACTCTTATGAGTTATGAGATCCGGCGCCGGAGTGTTTTTAAGG…
Sp-fmo2	SPU_002963	WHL22.720728	Scaffold856:137875-151240	Scaffold856:135856-136256	GCGGATTTGCCCCGGCCTGCCCCCGAGGGCCAATACAAGAAATGGCACGAAGCTCGTAGATAATGCAAACACAAACATCGTGGCCCGTAGCCTCCAATTTGTGCATACTTATAAAAGTAGCTTATCAAACTAATCTTTATGAAAGATTTCGACTCAAGTACAACCTTGTACCAGCATTTTAAAACGGTACTAAATTTACCAGCGAACAGGATAAAGCAGTCGTTAATTGTTACGAGGATATGGCACGAAATACACGTAAGTGCAGTGACGTAGATACAGGGCGCGTACCCCTCTCCCACAACGCTAGAGCGTCCTAGTGGCTGGACTACTCACGGTACACGCATGACGTATGCTAAATAAAAAAAAAATCCATTCGTCGATCTGTTGCAAGTCGAAACAT
Sp-sult1c_2	SPU_006187	WHL22.555128	Scaffold500:279725-292896	Scaffold500:293918-294295	GAATTAAATATGGGTCATGTTACGTGTTTATGTGACTGTGTTCAAACGACCGAATGACCAACCACTAGGCTTTCCCTCTAATGTATAATCATGTGTGTGCGTGTGTGTATGTGTGTATGTAGGTATGTGGTTGACCAATGCGAATGAGTTGAGGAAGTGACGTCATACTCGTTTATGCTTCTAATTGGACATGCGAAATAACGTGCGTGAGTGAGGGAGAGGAGTCTAGGGGGCGGATCAAGGGTATGAACAATTCCTCGAGGTTGATTTGATAAGCTTTAATACTTATTTCCATATTTCTAGTAAAAAAATACAGTTTGTGGATGTGGGTTCAAGAACAATTTATGATTATTTTATCAAAGCACTGCAACAAATGT
Sp-mif5	SPU_020036	WHL22.688866	Scaffold775:4678-8282	Scaffold775:9368-9884	ATCAACTGCAGCGAAATGTGAAAGTATTATATAGATATACTAAGCTCGTATAGAGAAAAGAAAAGTAATTCAAAATATGTTTAATAAGGTCTCATTTGAAATACGTTACATCAGCTTCCAAACTGTGCAAACCAAGAGTAAGCAAGCAATAAGAAGAAGAAGAAGAAAACGGAAGAAGTGAAGATGGTAATAATTTTGTTAAAAAACCTTGTGAAATAATTATGCAGGTATAAGTTCAGGGGAAAAAAAATCATTCTAACACTCTATAAAGTAAAGTAATAAGAAATAAAGACTTAATTGTACTGGTATCATTCTACGCTCTATAAAGTAAAGACAAAAATAAGAAACAATGACTTAATTGTACTGGTATCATTCCTATGCATCGAGGTCATCTTGCTG…
Sp-ese	SPU_024903	WHL22.110532	Scaffold1386:77061-92229	Scaffold1386:69345-69725	GAAGTAACCCGGAACTGCTAATTCTGTCCAACCTGACCGGTATACGACCGCAACGGGCGTTACTTTGTCCATGGACTTACTAGTTGACTAGTAAGTCCATGCTTCGTCTGAGCAAGAGCACAAGTCCGTGCAGGTGTGCCTAGGGTTATGGATACGAGCCCAGCTCGTCCAGTGTAGATGTCCAAACAACGAGTCAAGATGAGGTGAGGGCTGATGAGACTTCTAGCACGTACGGCCTGTGCTGCCTTGTCCTTGCCTGGTCCCATACTATAAGGAAAGTCTGCTATGCCAGCAGCAGCATGTATGTAGCCTGTGGCTGTAACATTCACCTTCGCGGCCCACACCCCTCACTCACTCCAAGATCAGACCAAGATAGGTCT
Sp-ese	SPU_024903	WHL22.110532	Scaffold1386:77061-92229	Scaffold1386:69919-70182	ACCTGCTGTACTAGAGAATCCAGTTAGTTGACCTAGGCCTTAGTTACTGCCTAAATTGCCGCCAAACACATCCATTCAGCTAGCACATGTCTATTACATTCTCTGCCTATACAACTCAACAGGGTCATGAGGGTTTAGAATGAAAGAAATTCCTGTCACATTGTGACATATCGTATGTATAATAAGATGAGGATCCTAATCAAATGATTGGTTGAGAGCGTACACGTGACCAGGCATTTATTTTGCCTTACACGTAATTTTAC
Sp-ese	SPU_024903	WHL22.110532	Scaffold1386:77061-92229	Scaffold1386:105544-106026	ATTTTATCGTCATTTTATTACAAGGCAAATGCGTGCTTTCAAACGCTAAAGAAATGTCAAGTAAACATGGTAAAACAAGAAGAGAAGGAGTACAACAACAATAACAACAACACCATCAAGGCATCAACAACAGCACGAAAGAAAAGAAAGCAAGAAACCAGATGACGAAACAAGTTTGTTACTCACCGACTCCGAGTTAATTCGAACGAAGACAAAAAAGGACAATTTGCTAAATGGTCTTCGCATACTCCACGAGAGTTGTCTGCATATTAGTTAAGCATGGATAGGCTTGTAAACAAACTATTAGAATCCTGGTTACTTTCATTTCTTCAAGAACAGATATCTATCTTTGTTGTAAAAGATCCCACGCTAATTCTGTCTATTCTTGAACAAGGCACT…
Sp-nfil3	SPU_024307	WHL22.733532	Scaffold89:637489-643966	Scaffold89:625203-625748	AATTAAAAGGAATAGGTTACAATAGACTTAGTAGATGTGTCTCAATTGAAATCAGATAGCGTAGTGTACGTTGCATTTCAATAAAGGAATGCATGGGCCATATGAAATGAGAAGAAAGGGACAAATAACCACATAAAAATTGGACTTCAAAAGACTCCAAGCAGATAGCGATCTTTTATCCTTTCAGGTCATTCACTCAACCCAACAAAGACCTCCTCTAAAAATAGCCCAAATCACAAAAGACATCTAAATATAACCTCCATAAATTCCCAAAATACATTTCTGCTTTGTGTGAGGATTCTATATTTAGAAGGGAGAATTCTACAGATATACCTTGCGGCGATTTGTTGCGTGAGAAATATAATCTATTATCCTAAACTAATCATTGTTTGTTGTTAG…
Sp-nfil3	SPU_024307	WHL22.733532	Scaffold89:637489-643966	Scaffold89:638821-639027	AGGCAATTTTTTCCAGAATAAGAGGATATCACAATCAATAGGCTATCTAGGTGTGTCTGTACGGCAAGACTAATATGTAGTATACTCCGAGCCCTAGCTGTGACGCTTGTGATTACGTAATGATTATGAATACGGGTCTCGGACCCGAAAAGGACGGTTTGCTTTATATCTTACCAGTGAGACGAACTTCCTGATCCTACTTGGAC

## Sheet: README
Supplemental Table S8: Coordinates and sequence information of eRNA peaks validated using GFP reporter constructs.
